# Supplementary material for: tRNA Fragments Show Intertwining with mRNAs of Specific Repeat Content and Have Links to Disparities
Source: Oxford University Press journal article supplement (doi:10.1158/0008-5472.can-19-0789), 2019-04-17
Supplement: 00085472can190789-sup-218537_1_supp_5440133_ppgclw.xlsx [file 00085472can190789-sup-218537_1_supp_5440133_ppgclw.xlsx]

## Sheet: S4
Supplemental Table S4: nuclear tRF--mRNA correlations
tRNA_fragment	mRNA (Gene Name|Entrez ID)	Spearman Correlation Coefficient	P-value	FDR
Cancer Type:	ACC
Positive Correlations
chr1.trna68-GlyGCC@1.29.29_2_10|Out	ELOVL1|64834	0.71	3.3e-13	5.9e-09
chr1.trna68-GlyGCC@1.29.29_2_10|Out	ACP1|52	0.71	3.3e-13	6e-09
chr1.trna35-GlyGCC@1.29.29_1_5	SLC31A1|1317	0.704	6.2e-13	9.6e-09
chr1.trna35-GlyGCC@1.29.29_1_5	ELOVL1|64834	0.687	3.8e-12	4.1e-08
chr1.trna111-HisGTG@9.29.21_1_10|Out	ACP1|52	0.677	9.7e-12	8.5e-08
chr1.trna68-GlyGCC@3.29.27_2_10|Out	ACP1|52	0.673	1.5e-11	1.2e-07
chr1.trna111-HisGTG@9.31.23_1_10	ELOVL1|64834	0.665	3e-11	2e-07
chr6.trna10-AlaCGC@1.23.23_3_8	GMNN|51053	0.664	3.5e-11	2.3e-07
chr1.trna35-GlyGCC@1.29.29_1_5	MOBKL3|25843	0.663	3.6e-11	2.3e-07
chr1.trna111-HisGTG@8.29.22_1_10|Out	POR|5447	0.66	4.9e-11	2.9e-07
chr1.trna35-GlyGCC@1.29.29_1_5	IDH1|3417	0.66	5e-11	3e-07
chr1.trna35-GlyGCC@1.29.29_1_5	ACP1|52	0.659	5.6e-11	3.2e-07
chr1.trna68-GlyGCC@1.29.29_2_10|Out	RTCD1|8634	0.658	5.9e-11	3.3e-07
chr1.trna111-HisGTG@9.29.21_1_10|Out	POR|5447	0.658	6e-11	3.4e-07
chr1.trna116-GluCTC@1.29.29_1_8|Out	ELOVL1|64834	0.657	6.2e-11	3.5e-07
chr6.trna10-AlaCGC@1.19.19_3_8	ELOVL1|64834	0.653	8.9e-11	4.6e-07
chr1.trna111-HisGTG@9.31.23_1_10	ACP1|52	0.653	9e-11	4.6e-07
chr1.trna111-HisGTG@9.31.23_1_10	TIMM17A|10440	0.653	9e-11	4.6e-07
chr1.trna35-GlyGCC@1.28.28_1_5	SLC31A1|1317	0.651	1.1e-10	5.2e-07
chr17.trna16-GlnTTG@11.33.23_2_12|Out	GMNN|51053	0.651	1.1e-10	5.4e-07
chr6.trna10-AlaCGC@1.23.23_3_8	AACS|65985	0.65	1.2e-10	5.6e-07
chr1.trna68-GlyGCC@1.29.29_2_10|Out	MOBKL3|25843	0.65	1.2e-10	5.6e-07
chr17.trna18-ArgCCT@1.19.19_1_3	POLR2J|5439	0.648	1.4e-10	6.5e-07
chr1.trna35-GlyGCC@1.29.29_1_5	TIMM17A|10440	0.648	1.5e-10	6.6e-07
chr1.trna68-GlyGCC@1.29.29_2_10|Out	SRP9|6726	0.648	1.5e-10	6.7e-07
chr1.trna111-HisGTG@-1A.23.24_1_9	GGT5|2687	0.647	1.6e-10	6.9e-07
chr6.trna10-AlaCGC@1.23.23_3_8	HMGCS1|3157	0.646	1.7e-10	7.5e-07
chr1.trna35-GlyGCC@1.22.22_1_5|Out	SLC31A1|1317	0.646	1.8e-10	7.6e-07
chr1.trna68-GlyGCC@1.29.29_2_10|Out	IDH1|3417	0.642	2.3e-10	9.3e-07
chr1.trna35-GlyGCC@1.30.30_1_5	SLC31A1|1317	0.642	2.5e-10	9.7e-07
chr1.trna111-HisGTG@5.30.26_1_10|Out	ELOVL1|64834	0.64	2.9e-10	1.1e-06
chr1.trna111-HisGTG@9.29.21_1_10|Out	CYP51A1|1595	0.639	3.1e-10	1.1e-06
chr6.trna10-AlaCGC@1.23.23_3_8	RAN|5901	0.639	3.1e-10	1.1e-06
chr1.trna111-HisGTG@9.29.21_1_10|Out	TIMM17A|10440	0.638	3.3e-10	1.2e-06
chr15.trna7-GlnCTG@11.34.24_1_7|Out	SLC31A1|1317	0.638	3.4e-10	1.2e-06
chr6.trna10-AlaCGC@1.23.23_3_8	LDLR|3949	0.637	3.7e-10	1.3e-06
chr1.trna116-GluCTC@1.29.29_1_8|Out	ACP1|52	0.636	4e-10	1.4e-06
chr1.trna111-HisGTG@-1T.23.24_1_9	GGT5|2687	0.635	4.4e-10	1.5e-06
chr6.trna10-AlaCGC@1.23.23_3_8	ELOVL1|64834	0.634	4.5e-10	1.5e-06
chr1.trna111-HisGTG@1.30.30_1_9	PDE6D|5147	0.634	4.7e-10	1.6e-06
chr6.trna10-AlaCGC@1.19.19_3_8	ACP1|52	0.633	4.8e-10	1.6e-06
chr1.trna111-HisGTG@8.31.24_1_10	SLC31A1|1317	0.632	5.3e-10	1.7e-06
chr1.trna35-GlyGCC@1.29.29_1_5	LRP11|84918	0.631	6e-10	1.9e-06
chr1.trna111-HisGTG@8.30.23_1_10|Out	ARL4A|10124	0.631	6.1e-10	1.9e-06
chr1.trna111-HisGTG@8.31.24_1_10	ELOVL1|64834	0.63	6.2e-10	1.9e-06
chr6.trna10-AlaCGC@1.23.23_3_8	NPTX1|4884	0.63	6.2e-10	1.9e-06
chr1.trna35-GlyGCC@1.29.29_1_5	RAN|5901	0.63	6.4e-10	1.9e-06
chr1.trna35-GlyGCC@1.29.29_1_5	YIF1A|10897	0.629	7e-10	2.1e-06
chr1.trna111-HisGTG@9.29.21_1_10|Out	SRP9|6726	0.629	7.2e-10	2.1e-06
chr1.trna35-GlyGCC@1.29.29_1_5	CEBPZ|10153	0.628	7.6e-10	2.2e-06
chr6.trna10-AlaCGC@1.23.23_3_8	HMGCR|3156	0.626	8.5e-10	2.4e-06
chr6.trna10-AlaCGC@1.23.23_3_8	CYP51A1|1595	0.625	9.3e-10	2.5e-06
chr1.trna111-HisGTG@1.30.30_1_9	LSM4|25804	0.625	9.8e-10	2.6e-06
chr1.trna111-HisGTG@9.31.23_1_10	IDH1|3417	0.625	9.9e-10	2.7e-06
chr1.trna35-GlyGCC@1.30.30_1_5	ELOVL1|64834	0.624	1e-09	2.7e-06
chr1.trna111-HisGTG@8.29.22_1_10|Out	ACP1|52	0.624	1e-09	2.7e-06
chr1.trna111-HisGTG@9.31.23_1_10	SLC31A1|1317	0.624	1e-09	2.8e-06
chr1.trna35-GlyGCC@1.29.29_1_5	CHEK2|11200	0.624	1.1e-09	2.8e-06
chr1.trna111-HisGTG@9.31.23_1_10	MOBKL3|25843	0.622	1.2e-09	3e-06
chr1.trna68-GlyGCC@1.29.29_2_10|Out	CYP51A1|1595	0.622	1.2e-09	3.1e-06
chr1.trna111-HisGTG@8.29.22_1_10|Out	SLC31A1|1317	0.622	1.3e-09	3.2e-06
chr1.trna35-GlyGCC@1.29.29_1_5	SRP9|6726	0.621	1.3e-09	3.2e-06
chr6.trna10-AlaCGC@1.22.22_3_8	MRPL4|51073	0.621	1.3e-09	3.3e-06
chr17.trna18-ArgCCT@1.19.19_1_3	ZNHIT1|10467	0.621	1.3e-09	3.3e-06
chr17.trna19-ArgTCG@1.19.19_1_1	NDUFA7|4701	0.621	1.4e-09	3.4e-06
chr1.trna68-GlyGCC@1.29.29_2_10|Out	CCT6A|908	0.62	1.4e-09	3.4e-06
chr1.trna68-GlyGCC@1.29.29_2_10|Out	PDIA6|10130	0.62	1.4e-09	3.5e-06
chr1.trna35-GlyGCC@1.29.29_1_5	CYP51A1|1595	0.62	1.5e-09	3.5e-06
chr1.trna111-HisGTG@-1A.23.24_1_9	FBLN1|2192	0.619	1.5e-09	3.6e-06
chr1.trna35-GlyGCC@1.29.29_1_5	EIF2S1|1965	0.619	1.6e-09	3.7e-06
chr1.trna111-HisGTG@9.29.21_1_10|Out	ELOVL1|64834	0.618	1.6e-09	3.9e-06
chr6.trna110-AlaTGC@58.75CCA.18_2_5	KDM1B|221656	0.618	1.7e-09	3.9e-06
chr1.trna35-GlyGCC@1.29.29_1_5	EPT1|85465	0.618	1.7e-09	3.9e-06
chr1.trna35-GlyGCC@1.29.29_1_5	PDIA6|10130	0.617	1.8e-09	4.1e-06
chr15.trna7-GlnCTG@20.42.23_1_6	ARF3|377	0.617	1.8e-09	4.1e-06
chr17.trna18-ArgCCT@1.19.19_1_3	NDUFA7|4701	0.616	1.9e-09	4.3e-06
chr17.trna19-ArgTCG@1.19.19_1_1	EIF5A|1984	0.616	1.9e-09	4.3e-06
chr17.trna18-ArgCCT@1.19.19_1_3	PSENEN|55851	0.616	1.9e-09	4.4e-06
chr17.trna18-ArgCCT@1.19.19_1_3	EIF5A|1984	0.616	2e-09	4.4e-06
chr1.trna111-HisGTG@9.29.21_1_10|Out	MOBKL3|25843	0.616	2e-09	4.4e-06
chr6.trna110-AlaTGC@1.19.19_5_13	CD83|9308	0.615	2e-09	4.5e-06
chr1.trna35-GlyGCC@1.29.29_1_5	DPH2|1802	0.615	2.1e-09	4.6e-06
chr1.trna35-GlyGCC@1.29.29_1_5	CCT6A|908	0.614	2.3e-09	5e-06
chr1.trna68-GlyGCC@1.29.29_2_10|Out	MSH6|2956	0.613	2.4e-09	5e-06
chr6.trna10-AlaCGC@1.23.23_3_8	MVD|4597	0.613	2.4e-09	5.1e-06
chr2.trna2-TyrGTA@59.76CCA.18_1_7	SLC31A1|1317	0.613	2.5e-09	5.2e-06
chr1.trna68-GlyGCC@1.29.29_2_10|Out	TIMM17A|10440	0.613	2.5e-09	5.2e-06
chr1.trna35-GlyGCC@1.27.27_1_5|Out	SLC31A1|1317	0.613	2.5e-09	5.2e-06
chr1.trna111-HisGTG@-1T.23.24_1_9	ISLR|3671	0.612	2.7e-09	5.5e-06
chr6.trna10-AlaCGC@1.23.23_3_8	NSDHL|50814	0.612	2.7e-09	5.5e-06
chr17.trna4-ArgTCT@1.19.19_1_4|Out	CCDC107|203260	0.612	2.7e-09	5.6e-06
chr1.trna111-HisGTG@8.29.22_1_10|Out	CEBPZ|10153	0.611	2.8e-09	5.7e-06
chr1.trna35-GlyGCC@1.29.29_1_5	RHOB|388	0.61	2.9e-09	5.9e-06
chr1.trna111-HisGTG@9.29.21_1_10|Out	SLC31A1|1317	0.61	3.1e-09	6e-06
chr1.trna111-HisGTG@9.29.21_1_10|Out	IDH1|3417	0.61	3.1e-09	6.1e-06
chr6.trna110-AlaTGC@59.75CCA.17_2_5	SLC31A1|1317	0.61	3.1e-09	6.1e-06
chr1.trna68-GlyGCC@1.29.29_2_10|Out	DPH2|1802	0.609	3.2e-09	6.2e-06
chr17.trna4-ArgTCT@1.19.19_1_4|Out	DMAP1|55929	0.609	3.3e-09	6.4e-06
chr1.trna35-GlyGCC@1.29.29_1_5	CD83|9308	0.608	3.4e-09	6.6e-06
chr17.trna16-GlnTTG@37.58.22_2_10	HSPE1|3336	0.606	4.1e-09	7.4e-06
chr15.trna4-ArgTCG@1.19.19_2_4	POLR2J|5439	0.606	4.1e-09	7.4e-06
chr15.trna7-GlnCTG@11.34.24_1_7|Out	ELOVL1|64834	0.606	4.1e-09	7.5e-06
chr1.trna111-HisGTG@8.29.22_1_10|Out	SRP9|6726	0.606	4.1e-09	7.5e-06
chr1.trna111-HisGTG@8.31.24_1_10	RNASEH1|246243	0.606	4.1e-09	7.5e-06
chr6.trna10-AlaCGC@1.22.22_3_8	ELOVL1|64834	0.606	4.2e-09	7.6e-06
chr1.trna111-HisGTG@1.30.30_1_9	ATG4D|84971	0.606	4.2e-09	7.6e-06
chr1.trna68-GlyGCC@1.29.29_2_10|Out	SLC31A1|1317	0.606	4.2e-09	7.6e-06
chr1.trna35-GlyGCC@1.29.29_1_5	HSPD1|3329	0.605	4.4e-09	7.8e-06
chr1.trna69-AspGTC@51.73C.23_1_12	YIPF4|84272	0.605	4.4e-09	7.9e-06
chr1.trna111-HisGTG@9.31.23_1_10	RNASEH1|246243	0.605	4.5e-09	8e-06
chr1.trna111-HisGTG@8.30.23_1_10|Out	SLC31A1|1317	0.604	4.7e-09	8.2e-06
chr17.trna19-ArgTCG@1.19.19_1_1	POLR2J|5439	0.604	4.8e-09	8.3e-06
chr17.trna18-ArgCCT@1.19.19_1_3	PFDN6|10471	0.604	4.9e-09	8.5e-06
chr1.trna35-GlyGCC@1.23.23_1_5|Out	SLC31A1|1317	0.604	4.9e-09	8.5e-06
chr1.trna116-GluCTC@1.28.28_1_8|Out	ACP1|52	0.603	5e-09	8.7e-06
chr1.trna68-GlyGCC@1.29.29_2_10|Out	FARSB|10056	0.603	5.1e-09	8.7e-06
chr1.trna68-GlyGCC@1.29.29_2_10|Out	RHOB|388	0.603	5.3e-09	8.9e-06
chr1.trna111-HisGTG@8.29.22_1_10|Out	TIMM17A|10440	0.602	5.4e-09	9e-06
chr7.trna5-CysGCA@10.33.24_1_7|Out	ELOVL1|64834	0.602	5.4e-09	9.1e-06
chr17.trna42-LeuTAG@1.22.22_2_9	SLC31A1|1317	0.602	5.5e-09	9.2e-06
chr17.trna16-GlnTTG@11.33.23_2_12|Out	RAN|5901	0.602	5.5e-09	9.3e-06
chr1.trna116-GluCTC@1.29.29_1_8|Out	SLC31A1|1317	0.601	5.8e-09	9.5e-06
chr1.trna35-GlyGCC@1.29.29_1_5	MRPL4|51073	0.601	5.9e-09	9.6e-06
chr1.trna111-HisGTG@8.29.22_1_10|Out	CCT6A|908	0.601	5.9e-09	9.7e-06
chr1.trna111-HisGTG@9.29.21_1_10|Out	CEBPZ|10153	0.601	6.1e-09	1e-05
chr1.trna111-HisGTG@5.30.26_1_10|Out	ACP1|52	0.6	6.4e-09	1e-05
chr6.trna10-AlaCGC@1.19.19_3_8	RHOB|388	0.6	6.4e-09	1e-05
chr1.trna111-HisGTG@5.30.26_1_10|Out	SLC31A1|1317	0.6	6.4e-09	1e-05
chr1.trna111-HisGTG@-1A.23.24_1_9	ISLR|3671	0.6	6.5e-09	1e-05
chr1.trna111-HisGTG@8.29.22_1_10|Out	RAN|5901	0.6	6.6e-09	1.1e-05
chr6.trna110-AlaTGC@1.19.19_5_13	ELOVL1|64834	0.599	6.7e-09	1.1e-05
chr1.trna111-HisGTG@9.31.23_1_10	DPH2|1802	0.599	6.7e-09	1.1e-05
chr1.trna111-HisGTG@3.30.28_1_9	CCT6A|908	0.599	6.9e-09	1.1e-05
chr17.trna18-ArgCCT@35.54.20_1_5	HNRNPM|4670	0.599	6.9e-09	1.1e-05
chr1.trna35-GlyGCC@1.29.29_1_5	FDPS|2224	0.599	7.1e-09	1.1e-05
chr1.trna68-GlyGCC@1.29.29_2_10|Out	CEBPZ|10153	0.599	7.1e-09	1.1e-05
chr1.trna35-GlyGCC@1.29.29_1_5	AACS|65985	0.599	7.1e-09	1.1e-05
chr1.trna111-HisGTG@5.30.26_1_10|Out	CCT6A|908	0.597	7.8e-09	1.2e-05
chr1.trna9-ArgTCT@1.19.19_1_1	POLR2J|5439	0.597	7.8e-09	1.2e-05
chr1.trna35-GlyGCC@1.28.28_1_5	IDH1|3417	0.597	7.9e-09	1.2e-05
chr13.trna3-GluTTC@1.22.22_1_2	NIPA2|81614	0.597	7.9e-09	1.2e-05
chr1.trna111-HisGTG@9.31.23_1_10	RTCD1|8634	0.597	8.2e-09	1.2e-05
chr13.trna3-GluTTC@1.30.30_1_2	ELOVL1|64834	0.597	8.2e-09	1.2e-05
chr1.trna111-HisGTG@9.31.23_1_10	PNPT1|87178	0.597	8.2e-09	1.2e-05
chr1.trna111-HisGTG@9.29.21_1_10|Out	CD83|9308	0.596	8.3e-09	1.2e-05
chr1.trna111-HisGTG@8.29.22_1_10|Out	CYP51A1|1595	0.596	8.3e-09	1.2e-05
chr1.trna35-GlyGCC@19.39.21_1_12	CHEK2|11200	0.596	8.4e-09	1.2e-05
chr17.trna19-ArgTCG@1.19.19_1_1	ZNHIT1|10467	0.596	8.5e-09	1.3e-05
chr6.trna10-AlaCGC@1.23.23_3_8	EBP|10682	0.596	8.7e-09	1.3e-05
chr1.trna68-GlyGCC@1.29.29_2_10|Out	MED8|112950	0.596	8.8e-09	1.3e-05
chr6.trna10-AlaCGC@1.19.19_3_8	PTPRF|5792	0.595	9e-09	1.3e-05
chr6.trna10-AlaCGC@58.75CCA.18_2_7	AIMP2|7965	0.595	9.1e-09	1.3e-05
chr1.trna32-MetCAT@34.56.23_1_8	CALM2|805	0.594	9.6e-09	1.4e-05
chr1.trna111-HisGTG@9.29.21_1_10|Out	FDPS|2224	0.594	9.6e-09	1.4e-05
chr1.trna111-HisGTG@8.31.24_1_10	EPT1|85465	0.594	9.6e-09	1.4e-05
chr1.trna111-HisGTG@9.31.23_1_10	CD83|9308	0.593	1e-08	1.4e-05
chr6.trna10-AlaCGC@1.22.22_3_8	PTPRF|5792	0.593	1e-08	1.4e-05
chr1.trna111-HisGTG@9.29.21_1_10|Out	PLD5|200150	0.593	1e-08	1.4e-05
chr1.trna111-HisGTG@8.29.22_1_10|Out	TYRO3|7301	0.593	1.1e-08	1.5e-05
chr1.trna35-GlyGCC@1.29.29_1_5	LDLR|3949	0.593	1.1e-08	1.5e-05
chr1.trna68-GlyGCC@1.29.29_2_10|Out	FDPS|2224	0.593	1.1e-08	1.5e-05
chr1.trna35-GlyGCC@1.29.29_1_5	LSM4|25804	0.593	1.1e-08	1.5e-05
chr1.trna111-HisGTG@-1T.23.24_1_9	AEBP1|165	0.592	1.1e-08	1.5e-05
chr1.trna111-HisGTG@9.29.21_1_10|Out	EPT1|85465	0.592	1.1e-08	1.5e-05
chr1.trna111-HisGTG@9.31.23_1_10	EPT1|85465	0.592	1.1e-08	1.5e-05
chr1.trna116-GluCTC@1.29.29_1_8|Out	IDH1|3417	0.592	1.1e-08	1.5e-05
chr1.trna35-GlyGCC@1.29.29_1_5	SCARB1|949	0.592	1.1e-08	1.6e-05
chr6.trna110-AlaTGC@1.19.19_5_13	TIMM17A|10440	0.592	1.1e-08	1.6e-05
chr1.trna35-GlyGCC@1.29.29_1_5	PSMB5|5693	0.591	1.2e-08	1.6e-05
chr1.trna35-GlyGCC@1.29.29_1_5	GREB1|9687	0.591	1.2e-08	1.6e-05
chr1.trna111-HisGTG@3.30.28_1_9	ACP1|52	0.591	1.2e-08	1.6e-05
chr13.trna5-GluTTC@1.30.30_1_2	SRP9|6726	0.591	1.2e-08	1.6e-05
chr6.trna10-AlaCGC@1.19.19_3_8	MOBKL3|25843	0.591	1.3e-08	1.7e-05
chr1.trna111-HisGTG@8.29.22_1_10|Out	EPT1|85465	0.591	1.3e-08	1.7e-05
chr1.trna111-HisGTG@8.29.22_1_10|Out	MOBKL3|25843	0.59	1.3e-08	1.7e-05
chr6.trna10-AlaCGC@1.23.23_3_8	IDI1|3422	0.589	1.4e-08	1.8e-05
chr6.trna10-AlaCGC@1.23.23_3_8	EPT1|85465	0.589	1.4e-08	1.8e-05
chr1.trna111-HisGTG@9.29.21_1_10|Out	CCT6A|908	0.589	1.4e-08	1.8e-05
chr15.trna7-GlnCTG@21.42.22_1_12|Out	ARF3|377	0.589	1.4e-08	1.8e-05
chr17.trna42-LeuTAG@1.20.20_2_9	CEBPZ|10153	0.589	1.5e-08	1.8e-05
chr1.trna68-GlyGCC@1.29.29_2_10|Out	CD83|9308	0.588	1.5e-08	1.9e-05
chr1.trna111-HisGTG@9.31.23_1_10	PLD5|200150	0.588	1.5e-08	1.9e-05
chr1.trna111-HisGTG@35.56.22_1_10	ANKDD1A|348094	0.588	1.5e-08	1.9e-05
chr17.trna18-ArgCCT@1.19.19_1_3	CCDC107|203260	0.588	1.5e-08	1.9e-05
chr1.trna111-HisGTG@8.29.22_1_10|Out	PNPT1|87178	0.588	1.5e-08	1.9e-05
chr15.trna7-GlnCTG@29.53.25_1_11	ARL4A|10124	0.588	1.6e-08	1.9e-05
chr6.trna10-AlaCGC@1.22.22_3_8	SLC31A1|1317	0.587	1.6e-08	2e-05
chr1.trna35-GlyGCC@1.30.30_1_5	LRP11|84918	0.587	1.6e-08	2e-05
chr14.trna18-TyrGTA@1.23.23_1_8|Out	CYCS|54205	0.587	1.6e-08	2e-05
chr1.trna35-GlyGCC@1.22.22_1_5|Out	ARL4A|10124	0.587	1.6e-08	2e-05
chr1.trna111-HisGTG@1.30.30_1_9	ACP1|52	0.587	1.7e-08	2e-05
chr19.trna2-GlyTCC@28.53.26_1_8	AIMP2|7965	0.586	1.7e-08	2e-05
chr1.trna111-HisGTG@5.30.26_1_10|Out	FARSB|10056	0.586	1.7e-08	2.1e-05
chr1.trna35-GlyGCC@1.28.28_1_5	MOBKL3|25843	0.586	1.7e-08	2.1e-05
chr17.trna19-ArgTCG@1.19.19_1_1	EIF5AL1|143244	0.586	1.8e-08	2.1e-05
chr6.trna10-AlaCGC@1.19.19_3_8	CD83|9308	0.586	1.8e-08	2.1e-05
chr1.trna35-GlyGCC@1.28.28_1_5	LSM4|25804	0.586	1.8e-08	2.1e-05
chr17.trna18-ArgCCT@35.54.20_1_5	IL1R2|7850	0.585	1.8e-08	2.2e-05
chr17.trna42-LeuTAG@1.20.20_2_9	SLC31A1|1317	0.585	1.8e-08	2.2e-05
chr1.trna35-GlyGCC@1.22.22_1_5|Out	LRP11|84918	0.585	1.9e-08	2.2e-05
chr15.trna7-GlnCTG@15.34.20_1_7|Out	ACP1|52	0.585	1.9e-08	2.2e-05
chr6.trna110-AlaTGC@1.19.19_5_13	MOBKL3|25843	0.584	1.9e-08	2.3e-05
chr6.trna110-AlaTGC@1.19.19_5_13	LDLR|3949	0.584	1.9e-08	2.3e-05
chr1.trna86-ArgTCT@1.19.19_1_1	PTS|5805	0.584	1.9e-08	2.3e-05
chr15.trna7-GlnCTG@29.53.25_1_11	CHEK2|11200	0.584	2e-08	2.3e-05
chr17.trna4-ArgTCT@1.19.19_1_4|Out	RBX1|9978	0.584	2e-08	2.3e-05
chr1.trna116-GluCTC@1.29.29_1_8|Out	MOBKL3|25843	0.584	2e-08	2.3e-05
chr1.trna111-HisGTG@8.30.23_1_10|Out	STRAP|11171	0.584	2e-08	2.3e-05
chr1.trna111-HisGTG@9.31.23_1_10	CYP51A1|1595	0.584	2e-08	2.3e-05
chr1.trna111-HisGTG@9.31.23_1_10	MRPL4|51073	0.584	2.1e-08	2.4e-05
chr6.trna10-AlaCGC@1.23.23_3_8	DHCR7|1717	0.583	2.1e-08	2.4e-05
chr13.trna5-GluTTC@1.22.22_1_2	TRABD|80305	0.583	2.1e-08	2.4e-05
chr17.trna18-ArgCCT@1.19.19_1_3	SHFM1|7979	0.583	2.2e-08	2.4e-05
chr16.trna11-ProAGG@1.30.30_3_18|Out	ELOVL1|64834	0.583	2.2e-08	2.5e-05
chr1.trna111-HisGTG@8.29.22_1_10|Out	CALM2|805	0.583	2.2e-08	2.5e-05
chr17.trna16-GlnTTG@8.30.23_2_13|Out	HNRNPM|4670	0.582	2.2e-08	2.5e-05
chr6.trna101-AlaAGC@1.30.30_2_6	BTN2A2|10385	0.582	2.2e-08	2.5e-05
chr1.trna111-HisGTG@-1T.21.22_1_9	ISLR|3671	0.582	2.2e-08	2.5e-05
chr1.trna111-HisGTG@8.31.24_1_10	TMEM120B|144404	0.582	2.3e-08	2.6e-05
chr1.trna111-HisGTG@8.31.24_1_10	MOBKL3|25843	0.582	2.3e-08	2.6e-05
chr2.trna2-TyrGTA@59.76CCA.18_1_7	ALDH1B1|219	0.582	2.3e-08	2.6e-05
chr1.trna111-HisGTG@8.29.22_1_10|Out	ELOVL1|64834	0.582	2.3e-08	2.6e-05
chr1.trna111-HisGTG@8.31.24_1_10	PTPRF|5792	0.581	2.4e-08	2.6e-05
chr1.trna35-GlyGCC@1.28.28_1_5	ACP1|52	0.581	2.4e-08	2.6e-05
chr6.trna10-AlaCGC@1.23.23_3_8	FDPS|2224	0.581	2.4e-08	2.6e-05
chr14.trna18-TyrGTA@1.23.23_1_8|Out	ZNF219|51222	0.581	2.4e-08	2.6e-05
chr1.trna68-GlyGCC@3.29.27_2_10|Out	MOBKL3|25843	0.581	2.4e-08	2.7e-05
chr16.trna11-ProAGG@1.30.30_3_18|Out	SLC31A1|1317	0.581	2.5e-08	2.7e-05
chr1.trna111-HisGTG@9.31.23_1_10	LOC90784|90784	0.581	2.5e-08	2.7e-05
chr19.trna2-GlyTCC@28.53.26_1_8	YIF1A|10897	0.581	2.5e-08	2.7e-05
chr6.trna110-AlaTGC@1.19.19_5_13	FDPS|2224	0.58	2.6e-08	2.8e-05
chr17.trna16-GlnTTG@11.33.23_2_12|Out	HMGCS1|3157	0.58	2.6e-08	2.8e-05
chr1.trna35-GlyGCC@1.29.29_1_5	TYRO3|7301	0.58	2.6e-08	2.8e-05
chr1.trna111-HisGTG@8.29.22_1_10|Out	IDH1|3417	0.58	2.6e-08	2.8e-05
chr1.trna68-GlyGCC@1.29.29_2_10|Out	EIF3J|8669	0.58	2.6e-08	2.8e-05
chr1.trna111-HisGTG@16.33.18_1_9	SLC31A1|1317	0.58	2.6e-08	2.8e-05
chr1.trna116-GluCTC@1.28.28_1_8|Out	COPS7B|64708	0.58	2.6e-08	2.8e-05
chr1.trna111-HisGTG@9.29.21_1_10|Out	IDI1|3422	0.58	2.7e-08	2.8e-05
chr6.trna110-AlaTGC@58.75CCA.18_2_5	SLC31A1|1317	0.58	2.7e-08	2.8e-05
chr1.trna111-HisGTG@8.30.23_1_10|Out	RAN|5901	0.58	2.7e-08	2.9e-05
chr1.trna111-HisGTG@9.31.23_1_10	CEBPZ|10153	0.58	2.7e-08	2.9e-05
chr1.trna111-HisGTG@8.31.24_1_10	SLC16A1|6566	0.58	2.7e-08	2.9e-05
chr6.trna16-TyrGTA@32.54.23_1_12	IL1R2|7850	0.579	2.7e-08	2.9e-05
chr1.trna116-GluCTC@1.28.28_1_8|Out	ELOVL1|64834	0.579	2.8e-08	2.9e-05
chr1.trna116-GluCTC@1.28.28_1_8|Out	LSM4|25804	0.579	2.8e-08	2.9e-05
chr1.trna111-HisGTG@8.29.22_1_10|Out	STRAP|11171	0.579	2.8e-08	2.9e-05
chr1.trna35-GlyGCC@1.29.29_1_5	STRAP|11171	0.579	2.8e-08	3e-05
chr15.trna4-ArgTCG@1.19.19_2_4	EIF5A|1984	0.579	2.8e-08	3e-05
chr17.trna16-GlnTTG@11.33.23_2_12|Out	GLO1|2739	0.579	2.8e-08	3e-05
chr1.trna35-GlyGCC@1.28.28_1_5	GREB1|9687	0.579	2.9e-08	3e-05
chr17.trna19-ArgTCG@1.19.19_1_1	TXNDC17|84817	0.578	2.9e-08	3e-05
chr6.trna110-AlaTGC@59.75CCA.17_2_5	KDM1B|221656	0.578	2.9e-08	3e-05
chr1.trna35-GlyGCC@12.32.21_4_18|Out	ELOVL1|64834	0.578	2.9e-08	3e-05
chr1.trna111-HisGTG@-1A.23.24_1_9	AEBP1|165	0.578	3e-08	3.1e-05
chr1.trna111-HisGTG@8.29.22_1_10|Out	FARSB|10056	0.577	3.1e-08	3.2e-05
chr1.trna35-GlyGCC@1.29.29_1_5	LOC90784|90784	0.577	3.1e-08	3.2e-05
chr1.trna9-ArgTCT@1.19.19_1_1	ZNHIT1|10467	0.577	3.2e-08	3.2e-05
chr1.trna111-HisGTG@-1T.22.23_1_9	GGT5|2687	0.577	3.2e-08	3.2e-05
chr17.trna18-ArgCCT@1.19.19_1_3	KRTCAP2|200185	0.577	3.2e-08	3.2e-05
chr1.trna111-HisGTG@9.31.23_1_10	PDIA6|10130	0.577	3.2e-08	3.2e-05
chr17.trna19-ArgTCG@1.19.19_1_1	NME1|4830	0.577	3.3e-08	3.3e-05
chr17.trna4-ArgTCT@1.19.19_1_4|Out	EIF5A|1984	0.576	3.4e-08	3.3e-05
chr1.trna111-HisGTG@-1T.23.24_1_9	IGFBP5|3488	0.576	3.4e-08	3.4e-05
chr1.trna35-GlyGCC@1.30.30_1_5	CHEK2|11200	0.576	3.4e-08	3.4e-05
chr17.trna23-ArgCCG@1.19.19_1_1|Out	POLR2J|5439	0.576	3.5e-08	3.4e-05
chr6.trna110-AlaTGC@58.75CCA.18_2_5	LRP11|84918	0.576	3.5e-08	3.5e-05
chr15.trna7-GlnCTG@20.41.22_1_7	ARF3|377	0.576	3.5e-08	3.5e-05
chr14.trna7-ArgACG@1.19.19_1_7|Out	POLR2J|5439	0.576	3.5e-08	3.5e-05
chr1.trna68-GlyGCC@1.29.29_2_10|Out	POLR2D|5433	0.575	3.6e-08	3.5e-05
chr1.trna111-HisGTG@9.29.21_1_10|Out	RAN|5901	0.575	3.6e-08	3.5e-05
chr13.trna3-GluTTC@1.22.22_1_2	SLTM|79811	0.575	3.7e-08	3.6e-05
chr1.trna35-GlyGCC@1.29.29_1_5	RTCD1|8634	0.575	3.7e-08	3.6e-05
chr1.trna35-GlyGCC@1.30.30_1_5	MOBKL3|25843	0.575	3.7e-08	3.6e-05
chr7.trna5-CysGCA@10.33.24_1_7|Out	CYP51A1|1595	0.575	3.7e-08	3.6e-05
chr17.trna42-LeuTAG@1.19.19_2_9	SLC31A1|1317	0.575	3.7e-08	3.6e-05
chr6.trna10-AlaCGC@1.23.23_3_8	ACAT2|39	0.575	3.8e-08	3.6e-05
chr17.trna16-GlnTTG@11.33.23_2_12|Out	SELS|55829	0.575	3.8e-08	3.6e-05
chr14.trna13-LysCTT@1.30.30_1_3	PDE6D|5147	0.575	3.8e-08	3.6e-05
chr1.trna111-HisGTG@8.31.24_1_10	SMAD2|4087	0.574	3.8e-08	3.7e-05
chr15.trna7-GlnCTG@19.40.22_1_7	TOMM34|10953	0.574	3.8e-08	3.7e-05
chr13.trna3-GluTTC@1.23.23_1_2	NIPA2|81614	0.574	3.9e-08	3.7e-05
chr1.trna86-ArgTCT@1.19.19_1_1	DMAP1|55929	0.574	3.9e-08	3.7e-05
chr1.trna116-GluCTC@1.29.29_1_8|Out	TIMM17A|10440	0.574	4e-08	3.8e-05
chr1.trna116-GluCTC@1.28.28_1_8|Out	SLC31A1|1317	0.574	4e-08	3.8e-05
chr17.trna42-LeuTAG@1.20.20_2_9	ACP1|52	0.574	4.1e-08	3.8e-05
chr1.trna111-HisGTG@8.29.22_1_10|Out	FDPS|2224	0.573	4.1e-08	3.9e-05
chr1.trna116-GluCTC@1.29.29_1_8|Out	SRP9|6726	0.573	4.1e-08	3.9e-05
chr6.trna10-AlaCGC@58.75CCA.18_2_7	DOLK|22845	0.573	4.1e-08	3.9e-05
chr1.trna68-GlyGCC@3.27.25_2_10|Out	LSM4|25804	0.573	4.2e-08	3.9e-05
chr1.trna111-HisGTG@11.34.24_1_9	PDE6D|5147	0.573	4.2e-08	3.9e-05
chr1.trna86-ArgTCT@1.19.19_1_1	CCDC107|203260	0.573	4.2e-08	3.9e-05
chr1.trna35-GlyGCC@1.29.29_1_5	PSMD1|5707	0.573	4.3e-08	4e-05
chr2.trna2-TyrGTA@59.76CCA.18_1_7	SELS|55829	0.573	4.3e-08	4e-05
chr1.trna68-GlyGCC@1.29.29_2_10|Out	LRP11|84918	0.573	4.3e-08	4e-05
chr6.trna110-AlaTGC@1.19.19_5_13	SLC31A1|1317	0.573	4.3e-08	4e-05
chr1.trna35-GlyGCC@1.29.29_1_5	IDI1|3422	0.572	4.4e-08	4e-05
chr6.trna10-AlaCGC@58.75CCA.18_2_7	SLC31A1|1317	0.572	4.4e-08	4.1e-05
chr14.trna18-TyrGTA@1.23.23_1_8|Out	NFIC|4782	0.572	4.5e-08	4.1e-05
chr1.trna35-GlyGCC@1.23.23_1_5|Out	EIF2S1|1965	0.572	4.6e-08	4.2e-05
chr1.trna35-GlyGCC@1.28.28_1_5	ELOVL1|64834	0.572	4.6e-08	4.2e-05
chr1.trna35-GlyGCC@1.30.30_1_5	MRPL4|51073	0.572	4.6e-08	4.2e-05
chr1.trna111-HisGTG@9.29.21_1_10|Out	RTCD1|8634	0.572	4.6e-08	4.2e-05
chr17.trna42-LeuTAG@1.20.20_2_9	SRP9|6726	0.571	4.7e-08	4.3e-05
chr2.trna2-TyrGTA@59.76CCA.18_1_7	TIMM17A|10440	0.571	4.8e-08	4.3e-05
chr14.trna18-TyrGTA@1.23.23_1_8|Out	DUSP16|80824	0.571	4.9e-08	4.4e-05
chr17.trna4-ArgTCT@1.19.19_1_4|Out	GLA|2717	0.571	4.9e-08	4.4e-05
chr1.trna111-HisGTG@35.56.22_1_10	DHCR24|1718	0.571	4.9e-08	4.4e-05
chr1.trna68-GlyGCC@1.30.30_2_10|Out	ELOVL1|64834	0.571	5e-08	4.4e-05
chr6.trna110-AlaTGC@1.19.19_5_13	CEBPZ|10153	0.57	5e-08	4.5e-05
chr16.trna11-ProAGG@1.30.30_3_18|Out	MOBKL3|25843	0.57	5e-08	4.5e-05
chr17.trna4-ArgTCT@1.19.19_1_4|Out	TRA2A|29896	0.57	5e-08	4.5e-05
chr1.trna35-GlyGCC@1.22.22_1_5|Out	EIF2S1|1965	0.57	5.1e-08	4.5e-05
chr1.trna68-GlyGCC@1.28.28_2_10|Out	ACP1|52	0.57	5.1e-08	4.5e-05
chr1.trna32-MetCAT@34.56.23_1_8	GMNN|51053	0.57	5.1e-08	4.5e-05
chr1.trna35-GlyGCC@1.29.29_1_5	TMEM120B|144404	0.57	5.1e-08	4.5e-05
chr1.trna111-HisGTG@5.30.26_1_10|Out	RHOB|388	0.57	5.1e-08	4.5e-05
chr1.trna35-GlyGCC@19.39.21_1_12	YIF1A|10897	0.57	5.2e-08	4.5e-05
chr1.trna9-ArgTCT@1.19.19_1_1	GNL2|29889	0.57	5.2e-08	4.6e-05
chr6.trna108-AlaAGC@58.75CCA.18_1_1	ARL4A|10124	0.57	5.2e-08	4.6e-05
chr6.trna10-AlaCGC@1.23.23_3_8	PTPRF|5792	0.57	5.2e-08	4.6e-05
chr1.trna35-GlyGCC@1.29.29_1_5	POR|5447	0.57	5.3e-08	4.6e-05
chr16.trna11-ProAGG@1.30.30_3_18|Out	ACP1|52	0.57	5.3e-08	4.6e-05
chr1.trna35-GlyGCC@1.29.29_1_5	PTPRF|5792	0.569	5.3e-08	4.6e-05
chr1.trna68-GlyGCC@1.29.29_2_10|Out	YWHAQ|10971	0.569	5.3e-08	4.7e-05
chr1.trna111-HisGTG@8.30.23_1_10|Out	CCT6A|908	0.569	5.3e-08	4.7e-05
chr1.trna116-GluCTC@1.28.28_1_8|Out	PDE6D|5147	0.569	5.5e-08	4.7e-05
chr15.trna7-GlnCTG@29.53.25_1_11	SLC31A1|1317	0.569	5.5e-08	4.8e-05
chr1.trna32-MetCAT@34.56.23_1_8	MED8|112950	0.569	5.5e-08	4.8e-05
chr1.trna69-AspGTC@51.73C.23_1_12	RTCD1|8634	0.569	5.6e-08	4.8e-05
chr1.trna111-HisGTG@9.29.21_1_10|Out	FARSB|10056	0.568	5.7e-08	4.9e-05
chr19.trna2-GlyTCC@28.53.26_1_8	ARL4A|10124	0.568	5.7e-08	4.9e-05
chr1.trna111-HisGTG@-1A.23.24_1_9	TAGLN|6876	0.568	5.7e-08	4.9e-05
chr6.trna110-AlaTGC@1.19.19_5_13	ACP1|52	0.568	5.7e-08	4.9e-05
chr1.trna111-HisGTG@8.31.24_1_10	RTCD1|8634	0.568	5.7e-08	4.9e-05
chr1.trna35-GlyGCC@1.29.29_1_5	MSH6|2956	0.568	5.7e-08	4.9e-05
chr1.trna32-MetCAT@34.56.23_1_8	ATP6V0B|533	0.568	5.8e-08	4.9e-05
chr1.trna111-HisGTG@8.31.24_1_10	DPH2|1802	0.568	5.8e-08	4.9e-05
chr1.trna111-HisGTG@9.29.21_1_10|Out	HMGCS1|3157	0.568	5.8e-08	4.9e-05
chr1.trna35-GlyGCC@1.29.29_1_5	NPTX1|4884	0.568	5.9e-08	5e-05
chr1.trna116-GluCTC@1.29.29_1_8|Out	CYP51A1|1595	0.568	5.9e-08	5e-05
chr6.trna10-AlaCGC@1.23.23_3_8	NCLN|56926	0.568	6e-08	5e-05
chr1.trna35-GlyGCC@1.28.28_1_5	LRP11|84918	0.568	6e-08	5.1e-05
chr1.trna68-GlyGCC@1.29.29_2_10|Out	E2F6|1876	0.567	6e-08	5.1e-05
chr1.trna111-HisGTG@5.30.26_1_10|Out	RTCD1|8634	0.567	6.1e-08	5.1e-05
chr6.trna110-AlaTGC@1.19.19_5_13	CYP51A1|1595	0.567	6.2e-08	5.2e-05
chr1.trna54-LysTTT@1.30.30_1_6	ACP1|52	0.567	6.2e-08	5.2e-05
chr15.trna7-GlnCTG@15.34.20_1_7|Out	SLC31A1|1317	0.567	6.2e-08	5.2e-05
chr6.trna10-AlaCGC@1.23.23_3_8	EIF2S1|1965	0.567	6.2e-08	5.2e-05
chr1.trna111-HisGTG@8.31.24_1_10	CHEK2|11200	0.567	6.3e-08	5.2e-05
chr1.trna116-GluCTC@1.28.28_1_8|Out	SRP9|6726	0.567	6.3e-08	5.3e-05
chr1.trna35-GlyGCC@1.29.29_1_5	EIF3J|8669	0.567	6.3e-08	5.3e-05
chr1.trna68-GlyGCC@1.29.29_2_10|Out	LOC90784|90784	0.567	6.4e-08	5.3e-05
chr1.trna111-HisGTG@9.29.21_1_10|Out	LDLR|3949	0.567	6.4e-08	5.3e-05
chr1.trna35-GlyGCC@1.29.29_1_5	YWHAQ|10971	0.566	6.5e-08	5.3e-05
chr1.trna35-GlyGCC@1.29.29_1_5	GMNN|51053	0.566	6.5e-08	5.3e-05
chr1.trna111-HisGTG@8.30.23_1_10|Out	EIF3B|8662	0.566	6.5e-08	5.3e-05
chr1.trna68-GlyGCC@3.29.27_2_10|Out	NOL10|79954	0.566	6.5e-08	5.3e-05
chr1.trna116-GluCTC@1.29.29_1_8|Out	RHOB|388	0.566	6.5e-08	5.3e-05
chr1.trna68-GlyGCC@1.29.29_2_10|Out	ZC3H15|55854	0.566	6.5e-08	5.4e-05
chr1.trna111-HisGTG@8.31.24_1_10	PNPT1|87178	0.566	6.5e-08	5.4e-05
chr7.trna5-CysGCA@10.33.24_1_7|Out	MOBKL3|25843	0.566	6.5e-08	5.4e-05
chr1.trna111-HisGTG@9.31.23_1_10	HSPD1|3329	0.566	6.6e-08	5.4e-05
chr14.trna18-TyrGTA@1.23.23_1_8|Out	LMBR1|64327	0.566	6.6e-08	5.4e-05
chr1.trna9-ArgTCT@1.19.19_1_1	EIF5A|1984	0.566	6.6e-08	5.4e-05
chr1.trna68-GlyGCC@1.29.29_2_10|Out	EPT1|85465	0.566	6.7e-08	5.4e-05
chr6.trna110-AlaTGC@1.19.19_5_13	RHOB|388	0.566	6.7e-08	5.5e-05
chr1.trna68-GlyGCC@1.29.29_2_10|Out	YIF1A|10897	0.566	6.7e-08	5.5e-05
chr1.trna35-GlyGCC@1.29.29_1_5	ACLY|47	0.566	6.7e-08	5.5e-05
chr6.trna10-AlaCGC@1.19.19_3_8	CEBPZ|10153	0.566	6.7e-08	5.5e-05
chr17.trna23-ArgCCG@1.19.19_1_1|Out	NDUFA7|4701	0.566	6.7e-08	5.5e-05
chr17.trna16-GlnTTG@11.33.23_2_12|Out	CYP51A1|1595	0.566	6.8e-08	5.5e-05
chr1.trna111-HisGTG@16.33.18_1_9	ARL4A|10124	0.566	6.8e-08	5.5e-05
chr15.trna7-GlnCTG@11.34.24_1_7|Out	EIF2S1|1965	0.565	6.9e-08	5.6e-05
chr17.trna18-ArgCCT@35.54.20_1_5	NIPA2|81614	0.565	6.9e-08	5.6e-05
chr6.trna10-AlaCGC@1.23.23_3_8	INSIG1|3638	0.565	6.9e-08	5.6e-05
chr1.trna111-HisGTG@-1T.23.24_1_9	FBLN1|2192	0.565	7e-08	5.6e-05
chr1.trna111-HisGTG@9.29.21_1_10|Out	MRPL4|51073	0.565	7.1e-08	5.7e-05
chr13.trna5-GluTTC@1.30.30_1_2	ELOVL1|64834	0.565	7.1e-08	5.7e-05
chr17.trna23-ArgCCG@1.19.19_1_1|Out	ARV1|64801	0.565	7.1e-08	5.7e-05
chr17.trna42-LeuTAG@1.18.18_2_9	SLC31A1|1317	0.565	7.2e-08	5.7e-05
chr1.trna68-GlyGCC@3.29.27_2_10|Out	TMEM18|129787	0.565	7.2e-08	5.8e-05
chr6.trna10-AlaCGC@1.19.19_3_8	CYP51A1|1595	0.565	7.3e-08	5.8e-05
chr1.trna111-HisGTG@16.33.18_1_9	CCT6A|908	0.564	7.4e-08	5.8e-05
chr1.trna111-HisGTG@-1T.23.24_1_9	NGFR|4804	0.564	7.4e-08	5.8e-05
chr17.trna16-GlnTTG@8.33.26_2_12|Out	GREB1|9687	0.564	7.5e-08	5.9e-05
chr17.trna18-ArgCCT@1.19.19_1_3	EIF5AL1|143244	0.564	7.5e-08	5.9e-05
chr1.trna111-HisGTG@9.32.24_1_9	CYP51A1|1595	0.564	7.6e-08	6e-05
chr14.trna18-TyrGTA@1.25.25_1_8|Out	TAF9|6880	0.564	7.6e-08	6e-05
chr1.trna111-HisGTG@9.29.21_1_10|Out	STRAP|11171	0.564	7.6e-08	6e-05
chr1.trna68-GlyGCC@1.29.29_2_10|Out	SLC5A6|8884	0.564	7.6e-08	6e-05
chr1.trna111-HisGTG@8.31.24_1_10	SNX10|29887	0.564	7.6e-08	6e-05
chr6.trna10-AlaCGC@1.19.19_3_8	RTCD1|8634	0.564	7.7e-08	6e-05
chr1.trna35-GlyGCC@1.29.29_1_5	FARSB|10056	0.564	7.7e-08	6e-05
chr19.trna2-GlyTCC@28.53.26_1_8	LRP11|84918	0.564	7.7e-08	6e-05
chr1.trna9-ArgTCT@1.19.19_1_1	NDUFA7|4701	0.564	7.8e-08	6.1e-05
chr1.trna35-GlyGCC@1.29.29_1_5	NOL10|79954	0.564	7.8e-08	6.1e-05
chr6.trna110-AlaTGC@1.19.19_5_13	PECI|10455	0.563	7.8e-08	6.1e-05
chr1.trna111-HisGTG@9.31.23_1_10	PTPRF|5792	0.563	7.8e-08	6.1e-05
chr1.trna111-HisGTG@8.31.24_1_10	TIMM17A|10440	0.563	7.9e-08	6.1e-05
chr1.trna68-GlyGCC@1.29.29_2_10|Out	PSMD1|5707	0.563	7.9e-08	6.1e-05
chr6.trna110-AlaTGC@1.19.19_5_13	HSD17B7|51478	0.563	7.9e-08	6.1e-05
chr6.trna10-AlaCGC@1.22.22_3_8	GREB1|9687	0.563	7.9e-08	6.1e-05
chr1.trna111-HisGTG@3.30.28_1_9	ELOVL1|64834	0.563	8e-08	6.2e-05
chr1.trna35-GlyGCC@1.29.29_1_5	NCLN|56926	0.563	8e-08	6.2e-05
chr6.trna110-AlaTGC@1.19.19_5_13	GLO1|2739	0.563	8.1e-08	6.2e-05
chr1.trna111-HisGTG@16.33.18_1_9	MTP18|51537	0.563	8.1e-08	6.2e-05
chr17.trna18-ArgCCT@1.19.19_1_3	ARV1|64801	0.563	8.2e-08	6.3e-05
chr1.trna35-GlyGCC@19.39.21_1_12	GLRX|2745	0.563	8.2e-08	6.3e-05
chr6.trna10-AlaCGC@1.22.22_3_8	RHOB|388	0.563	8.2e-08	6.3e-05
chr1.trna35-GlyGCC@1.30.30_1_5	ACP1|52	0.563	8.3e-08	6.3e-05
chr15.trna7-GlnCTG@21.44.24_1_12|Out	ARF3|377	0.563	8.3e-08	6.3e-05
chr17.trna18-ArgCCT@1.19.19_1_3	PRELID1|27166	0.563	8.3e-08	6.3e-05
chr1.trna35-GlyGCC@1.30.30_1_5	GREB1|9687	0.562	8.3e-08	6.4e-05
chr7.trna5-CysGCA@10.33.24_1_7|Out	ACP1|52	0.562	8.4e-08	6.4e-05
chr1.trna35-GlyGCC@1.30.30_1_5	RHOB|388	0.562	8.4e-08	6.4e-05
chr1.trna69-AspGTC@51.73C.23_1_12	ELOVL1|64834	0.562	8.5e-08	6.4e-05
chr6.trna110-AlaTGC@1.19.19_5_13	GMNN|51053	0.562	8.5e-08	6.4e-05
chr15.trna7-GlnCTG@15.34.20_1_7|Out	SRP9|6726	0.562	8.6e-08	6.5e-05
chr17.trna18-ArgCCT@35.54.20_1_5	YIF1A|10897	0.562	8.6e-08	6.5e-05
chr17.trna18-ArgCCT@35.54.20_1_5	TRIM25|7706	0.562	8.7e-08	6.5e-05
chr13.trna3-GluTTC@1.22.22_1_2	FAM82A2|55177	0.562	8.7e-08	6.6e-05
chr1.trna68-GlyGCC@1.29.29_2_10|Out	AACS|65985	0.562	8.7e-08	6.6e-05
chr1.trna111-HisGTG@5.30.26_1_10|Out	MED8|112950	0.562	8.8e-08	6.6e-05
chr1.trna68-GlyGCC@1.29.29_2_10|Out	PTPRF|5792	0.562	8.8e-08	6.6e-05
chr1.trna111-HisGTG@9.29.21_1_10|Out	HSPD1|3329	0.562	8.9e-08	6.6e-05
chr14.trna13-LysCTT@1.30.30_1_3	ACP1|52	0.561	9e-08	6.7e-05
chr6.trna10-AlaCGC@1.23.23_3_8	PANK3|79646	0.561	9.2e-08	6.8e-05
chr13.trna3-GluTTC@1.22.22_1_2	HERC1|8925	0.561	9.2e-08	6.8e-05
chr1.trna68-GlyGCC@1.30.30_2_10|Out	ACP1|52	0.561	9.2e-08	6.8e-05
chr15.trna4-ArgTCG@1.19.19_2_4	ZNHIT1|10467	0.561	9.2e-08	6.8e-05
chr13.trna3-GluTTC@1.28.28_1_2	RTCD1|8634	0.561	9.2e-08	6.8e-05
chr1.trna35-GlyGCC@1.28.28_1_5	CHEK2|11200	0.561	9.2e-08	6.8e-05
chr17.trna18-ArgCCT@1.19.19_1_3	GNL2|29889	0.561	9.3e-08	6.8e-05
chr17.trna42-LeuTAG@1.22.22_2_9	YIF1A|10897	0.561	9.3e-08	6.9e-05
chr6.trna10-AlaCGC@1.23.23_3_8	SQLE|6713	0.561	9.3e-08	6.9e-05
chr7.trna5-CysGCA@10.33.24_1_7|Out	EPT1|85465	0.561	9.4e-08	6.9e-05
chr1.trna111-HisGTG@9.31.23_1_10	RPS6KC1|26750	0.561	9.4e-08	6.9e-05
chr16.trna11-ProAGG@1.30.30_3_18|Out	GREB1|9687	0.561	9.4e-08	6.9e-05
chr14.trna18-TyrGTA@1.23.23_1_8|Out	FLJ10357|55701	0.561	9.4e-08	6.9e-05
chr1.trna68-GlyGCC@3.29.27_2_10|Out	CCT6A|908	0.561	9.4e-08	6.9e-05
chr6.trna110-AlaTGC@1.19.19_5_13	SRP9|6726	0.561	9.4e-08	6.9e-05
chr15.trna7-GlnCTG@11.34.24_1_7|Out	YIF1A|10897	0.561	9.5e-08	6.9e-05
chr1.trna111-HisGTG@11.34.24_1_9	FAM125A|93343	0.56	9.6e-08	7e-05
chr17.trna4-ArgTCT@1.19.19_1_4|Out	RHBDD2|57414	0.56	9.7e-08	7e-05
chr17.trna19-ArgTCG@1.19.19_1_1	SHFM1|7979	0.56	9.7e-08	7e-05
chr1.trna35-GlyGCC@1.27.27_1_5|Out	MRPL50|54534	0.56	9.7e-08	7e-05
chr17.trna19-ArgTCG@1.19.19_1_1	RBX1|9978	0.56	9.9e-08	7.2e-05
chr1.trna111-HisGTG@8.31.24_1_10	PURB|5814	0.559	1e-07	7.3e-05
chr7.trna5-CysGCA@10.33.24_1_7|Out	SLC31A1|1317	0.559	1e-07	7.3e-05
chr1.trna111-HisGTG@9.29.21_1_10|Out	AACS|65985	0.559	1e-07	7.4e-05
chr1.trna35-GlyGCC@1.28.28_1_5	PRPF4|9128	0.559	1e-07	7.4e-05
chr1.trna111-HisGTG@8.31.24_1_10	QSOX2|169714	0.559	1e-07	7.4e-05
chr6.trna10-AlaCGC@1.23.23_3_8	HSD17B7|51478	0.559	1e-07	7.4e-05
chr15.trna7-GlnCTG@11.34.24_1_7|Out	ARL4A|10124	0.559	1.1e-07	7.5e-05
chr1.trna35-GlyGCC@1.29.29_1_5	CHCHD2|51142	0.559	1.1e-07	7.5e-05
chr17.trna16-GlnTTG@8.33.26_2_12|Out	ELOVL1|64834	0.559	1.1e-07	7.5e-05
chr1.trna111-HisGTG@8.31.24_1_10	VKORC1L1|154807	0.559	1.1e-07	7.5e-05
chr1.trna32-MetCAT@34.56.23_1_8	TOE1|114034	0.559	1.1e-07	7.5e-05
chr17.trna42-LeuTAG@1.19.19_2_9	CEBPZ|10153	0.559	1.1e-07	7.5e-05
chr15.trna7-GlnCTG@11.34.24_1_7|Out	SRP9|6726	0.559	1.1e-07	7.5e-05
chr7.trna5-CysGCA@9.32.24_2_8|Out	ELOVL1|64834	0.559	1.1e-07	7.6e-05
chr6.trna10-AlaCGC@1.23.23_3_8	FDFT1|2222	0.558	1.1e-07	7.6e-05
chr1.trna68-GlyGCC@1.29.29_2_10|Out	EXTL2|2135	0.558	1.1e-07	7.7e-05
chr6.trna110-AlaTGC@1.19.19_5_13	HMGCS1|3157	0.558	1.1e-07	7.7e-05
chr1.trna111-HisGTG@9.31.23_1_10	PSMD1|5707	0.558	1.1e-07	7.7e-05
chr17.trna4-ArgTCT@1.19.19_1_4|Out	GNL2|29889	0.558	1.1e-07	7.8e-05
chr1.trna111-HisGTG@8.29.22_1_10|Out	RTCD1|8634	0.558	1.1e-07	7.8e-05
chr1.trna68-GlyGCC@1.28.28_2_10|Out	IDH1|3417	0.558	1.1e-07	7.8e-05
chr1.trna68-GlyGCC@1.29.29_2_10|Out	HSPD1|3329	0.558	1.1e-07	7.8e-05
chr17.trna16-GlnTTG@37.58.22_2_10	CYP11A1|1583	0.558	1.1e-07	7.9e-05
chr15.trna7-GlnCTG@11.34.24_1_7|Out	ACP1|52	0.557	1.1e-07	7.9e-05
chr1.trna111-HisGTG@1.30.30_1_9	POR|5447	0.557	1.1e-07	7.9e-05
chr15.trna7-GlnCTG@8.34.27_1_7|Out	TRIM25|7706	0.557	1.2e-07	7.9e-05
chr1.trna116-GluCTC@1.29.29_1_8|Out	LSM4|25804	0.557	1.2e-07	8e-05
chr1.trna35-GlyGCC@1.29.29_1_5	QSOX2|169714	0.557	1.2e-07	8e-05
chr6.trna10-AlaCGC@1.19.19_3_8	TIMM17A|10440	0.557	1.2e-07	8e-05
chr1.trna9-ArgTCT@1.19.19_1_1	TRA2A|29896	0.557	1.2e-07	8e-05
chr15.trna7-GlnCTG@11.34.24_1_7|Out	GMNN|51053	0.557	1.2e-07	8e-05
chr15.trna7-GlnCTG@11.34.24_1_7|Out	SELS|55829	0.557	1.2e-07	8e-05
chr1.trna68-GlyGCC@1.29.29_2_10|Out	YIPF4|84272	0.557	1.2e-07	8e-05
chr17.trna16-GlnTTG@17.33.17_2_12|Out	RHOB|388	0.557	1.2e-07	8.1e-05
chr6.trna10-AlaCGC@58.75CCA.18_2_7	LRP11|84918	0.557	1.2e-07	8.1e-05
chr6.trna110-AlaTGC@58.75CCA.18_2_5	C1GALT1|56913	0.557	1.2e-07	8.1e-05
chr1.trna111-HisGTG@9.29.21_1_10|Out	CHCHD2|51142	0.557	1.2e-07	8.1e-05
chr14.trna18-TyrGTA@1.23.23_1_8|Out	OPA3|80207	0.557	1.2e-07	8.1e-05
chr1.trna35-GlyGCC@1.30.30_1_5	IDH1|3417	0.557	1.2e-07	8.2e-05
chr7.trna5-CysGCA@10.33.24_1_7|Out	CBX3|11335	0.557	1.2e-07	8.2e-05
chr1.trna34-LeuCAG@70.86CCA.17_1_7|Out	LRP11|84918	0.557	1.2e-07	8.2e-05
chr15.trna4-ArgTCG@1.19.19_2_4	PSMG3|84262	0.557	1.2e-07	8.2e-05
chr15.trna7-GlnCTG@23.44.22_1_12|Out	ICMT|23463	0.557	1.2e-07	8.2e-05
chr1.trna54-LysTTT@1.30.30_1_6	SRP9|6726	0.556	1.2e-07	8.3e-05
chr13.trna3-GluTTC@1.22.22_1_2	AP4E1|23431	0.556	1.2e-07	8.3e-05
chr1.trna111-HisGTG@9.31.23_1_10	SRP9|6726	0.556	1.2e-07	8.3e-05
chr1.trna111-HisGTG@9.29.21_1_10|Out	RHOB|388	0.556	1.2e-07	8.3e-05
chr1.trna111-HisGTG@35.56.22_1_10	CYP11A1|1583	0.556	1.2e-07	8.3e-05
chr14.trna18-TyrGTA@1.23.23_1_8|Out	SLC1A2|6506	0.556	1.2e-07	8.3e-05
chr6.trna110-AlaTGC@1.19.19_5_13	PTPRF|5792	0.556	1.2e-07	8.4e-05
chr1.trna111-HisGTG@9.31.23_1_10	POR|5447	0.556	1.2e-07	8.4e-05
chr15.trna7-GlnCTG@21.42.22_1_12|Out	NAP1L3|4675	0.556	1.2e-07	8.4e-05
chr1.trna68-GlyGCC@1.29.29_2_10|Out	NOL10|79954	0.556	1.3e-07	8.4e-05
chr1.trna111-HisGTG@9.34.26_1_9	NDUFA7|4701	0.556	1.3e-07	8.4e-05
chr1.trna116-GluCTC@1.29.29_1_8|Out	CEBPZ|10153	0.556	1.3e-07	8.5e-05
chr14.trna18-TyrGTA@1.23.23_1_8|Out	DHX29|54505	0.556	1.3e-07	8.5e-05
chr1.trna111-HisGTG@9.29.21_1_10|Out	HMGCR|3156	0.556	1.3e-07	8.6e-05
chr1.trna111-HisGTG@5.30.26_1_10|Out	MOBKL3|25843	0.556	1.3e-07	8.6e-05
chr1.trna111-HisGTG@5.30.26_1_10|Out	EPT1|85465	0.556	1.3e-07	8.6e-05
chr17.trna16-GlnTTG@8.30.23_2_13|Out	NIPA2|81614	0.556	1.3e-07	8.6e-05
chr1.trna111-HisGTG@9.31.23_1_10	RAB4A|5867	0.556	1.3e-07	8.6e-05
chr17.trna16-GlnTTG@9.33.25_2_12|Out	ELOVL1|64834	0.555	1.3e-07	8.7e-05
chr14.trna7-ArgACG@1.19.19_1_7|Out	ZNHIT1|10467	0.555	1.3e-07	8.8e-05
chr7.trna5-CysGCA@10.33.24_1_7|Out	PTPRF|5792	0.555	1.3e-07	8.8e-05
chr1.trna68-GlyGCC@3.27.25_2_10|Out	PSMB7|5695	0.555	1.3e-07	8.8e-05
chr13.trna3-GluTTC@1.22.22_1_2	PTPN9|5780	0.555	1.3e-07	8.9e-05
chr1.trna116-GluCTC@1.28.28_1_8|Out	IDH1|3417	0.555	1.4e-07	8.9e-05
chr1.trna111-HisGTG@16.34.19_1_9	LSM4|25804	0.555	1.4e-07	8.9e-05
chr6.trna110-AlaTGC@1.19.19_5_13	IDI1|3422	0.555	1.4e-07	8.9e-05
chr1.trna68-GlyGCC@1.29.29_2_10|Out	PNPT1|87178	0.555	1.4e-07	9e-05
chr13.trna3-GluTTC@1.23.23_1_2	AP4E1|23431	0.555	1.4e-07	9e-05
chr6.trna16-TyrGTA@32.54.23_1_12	HNRNPM|4670	0.555	1.4e-07	9e-05
chr1.trna111-HisGTG@5.30.26_1_10|Out	YWHAQ|10971	0.555	1.4e-07	9e-05
chr14.trna18-TyrGTA@1.25.25_1_8|Out	DUSP16|80824	0.554	1.4e-07	9.1e-05
chr1.trna111-HisGTG@9.29.21_1_10|Out	PNPT1|87178	0.554	1.4e-07	9.2e-05
chr1.trna35-GlyGCC@12.32.21_4_18|Out	CBX3|11335	0.554	1.4e-07	9.2e-05
chr1.trna111-HisGTG@8.30.23_1_10|Out	PTPRF|5792	0.554	1.4e-07	9.3e-05
chr1.trna35-GlyGCC@1.29.29_1_5	PRPF4|9128	0.554	1.4e-07	9.3e-05
chr14.trna18-TyrGTA@1.23.23_1_8|Out	KLHDC10|23008	0.554	1.4e-07	9.3e-05
chr7.trna5-CysGCA@9.32.24_2_8|Out	CBX3|11335	0.554	1.5e-07	9.4e-05
chr6.trna10-AlaCGC@1.19.19_3_8	FDPS|2224	0.553	1.5e-07	9.4e-05
chr17.trna42-LeuTAG@1.20.20_2_9	CALM2|805	0.553	1.5e-07	9.5e-05
chr17.trna42-LeuTAG@1.20.20_2_9	TIMM17A|10440	0.553	1.5e-07	9.5e-05
chr15.trna7-GlnCTG@10.34.25_1_7|Out	ELOVL1|64834	0.553	1.5e-07	9.5e-05
chr17.trna16-GlnTTG@11.33.23_2_12|Out	ELOVL1|64834	0.553	1.5e-07	9.5e-05
chr17.trna42-LeuTAG@1.19.19_2_9	IER3IP1|51124	0.553	1.5e-07	9.5e-05
chr1.trna111-HisGTG@9.32.24_1_9	TIMM17A|10440	0.553	1.5e-07	9.6e-05
chr1.trna111-HisGTG@16.33.18_1_9	PNPT1|87178	0.553	1.5e-07	9.6e-05
chr2.trna2-TyrGTA@59.76CCA.18_1_7	ILF2|3608	0.553	1.5e-07	9.6e-05
chr6.trna10-AlaCGC@1.19.19_3_8	SRP9|6726	0.553	1.5e-07	9.6e-05
chr1.trna35-GlyGCC@1.23.23_1_5|Out	MRPL4|51073	0.553	1.5e-07	9.6e-05
chr1.trna35-GlyGCC@1.29.29_1_5	PIN1|5300	0.553	1.5e-07	9.7e-05
chr1.trna35-GlyGCC@1.29.29_1_5	ALDH1B1|219	0.553	1.5e-07	9.7e-05
chr17.trna16-GlnTTG@8.33.26_2_12|Out	TRIM25|7706	0.553	1.5e-07	9.7e-05
chr1.trna34-LeuCAG@69.86CCA.18_1_7|Out	DOLK|22845	0.553	1.5e-07	9.7e-05
chr15.trna4-ArgTCG@1.19.19_2_4	TAF6|6878	0.553	1.5e-07	9.7e-05
chr13.trna3-GluTTC@1.30.30_1_2	CYP51A1|1595	0.553	1.5e-07	9.7e-05
chr1.trna35-GlyGCC@1.29.29_1_5	SELS|55829	0.553	1.5e-07	9.8e-05
chr2.trna2-TyrGTA@59.76CCA.18_1_7	ARPC5L|81873	0.553	1.6e-07	9.8e-05
chr17.trna18-ArgCCT@1.19.19_1_3	PSMG4|389362	0.552	1.6e-07	9.8e-05
chr1.trna111-HisGTG@9.33.25_1_9	ELOVL1|64834	0.552	1.6e-07	9.9e-05
chr1.trna111-HisGTG@1.30.30_1_9	SRP9|6726	0.552	1.6e-07	9.9e-05
chr17.trna19-ArgTCG@1.19.19_1_1	PSENEN|55851	0.552	1.6e-07	9.9e-05
chr1.trna35-GlyGCC@1.30.30_1_5	LTB4R|1241	0.552	1.6e-07	9.9e-05
chr6.trna10-AlaCGC@1.23.23_3_8	STARD4|134429	0.552	1.6e-07	0.0001
chr6.trna108-AlaAGC@58.75CCA.18_1_1	CYCS|54205	0.552	1.6e-07	0.0001
chr17.trna16-GlnTTG@7.33.27_2_12	ELOVL1|64834	0.552	1.6e-07	0.0001
chr15.trna7-GlnCTG@11.34.24_1_7|Out	FDPS|2224	0.552	1.6e-07	0.0001
chr1.trna111-HisGTG@9.29.21_1_10|Out	TYRO3|7301	0.552	1.6e-07	0.0001
chr19.trna2-GlyTCC@28.53.26_1_8	CHEK2|11200	0.552	1.6e-07	0.0001
chr6.trna10-AlaCGC@1.19.19_3_8	SLC31A1|1317	0.552	1.6e-07	0.0001
chr1.trna32-MetCAT@34.56.23_1_8	WNT5A|7474	0.552	1.6e-07	0.0001
chr1.trna111-HisGTG@8.29.22_1_10|Out	SELS|55829	0.552	1.6e-07	0.0001
chr13.trna5-GluTTC@1.30.30_1_2	ACP1|52	0.552	1.6e-07	0.0001
chr15.trna4-ArgTCG@1.19.19_2_4	RBX1|9978	0.552	1.7e-07	0.0001
chr1.trna111-HisGTG@15.34.20_1_9	LSM4|25804	0.552	1.7e-07	0.0001
chr15.trna7-GlnCTG@11.34.24_1_7|Out	RCN2|5955	0.552	1.7e-07	0.0001
chr17.trna18-ArgCCT@1.19.19_1_3	NFKBIB|4793	0.551	1.7e-07	0.0001
chr19.trna2-GlyTCC@28.53.26_1_8	EIF2S1|1965	0.551	1.7e-07	0.0001
chr6.trna110-AlaTGC@1.19.19_5_13	ISG20|3669	0.551	1.7e-07	0.0001
chr17.trna18-ArgCCT@35.54.20_1_5	AIMP2|7965	0.551	1.7e-07	0.0001
chr7.trna5-CysGCA@10.33.24_1_7|Out	CEBPZ|10153	0.551	1.7e-07	0.0001
chr17.trna18-ArgCCT@1.19.19_1_3	RBX1|9978	0.551	1.7e-07	0.00011
chr1.trna68-GlyGCC@1.29.29_2_10|Out	IDI1|3422	0.551	1.7e-07	0.00011
chr15.trna7-GlnCTG@11.34.24_1_7|Out	CYP51A1|1595	0.551	1.7e-07	0.00011
chr1.trna35-GlyGCC@19.39.21_1_12	SLC31A1|1317	0.551	1.7e-07	0.00011
chr1.trna35-GlyGCC@1.29.29_1_5	HMGCR|3156	0.551	1.8e-07	0.00011
chr1.trna111-HisGTG@11.34.24_1_9	LSM4|25804	0.551	1.8e-07	0.00011
chr16.trna11-ProAGG@1.30.30_3_18|Out	SRP9|6726	0.551	1.8e-07	0.00011
chr1.trna68-GlyGCC@3.29.27_2_10|Out	SRP9|6726	0.551	1.8e-07	0.00011
chr1.trna111-HisGTG@8.30.23_1_10|Out	EPRS|2058	0.55	1.8e-07	0.00011
chr1.trna111-HisGTG@9.29.21_1_10|Out	CALM2|805	0.55	1.8e-07	0.00011
chr17.trna18-ArgCCT@35.54.20_1_5	CEBPZ|10153	0.55	1.8e-07	0.00011
chr1.trna111-HisGTG@16.33.18_1_9	COBRA1|25920	0.55	1.8e-07	0.00011
chr15.trna4-ArgTCG@1.19.19_2_4	PFDN6|10471	0.55	1.8e-07	0.00011
chr14.trna7-ArgACG@1.19.19_1_7|Out	EIF5A|1984	0.55	1.8e-07	0.00011
chr1.trna111-HisGTG@3.30.28_1_9	MED8|112950	0.55	1.9e-07	0.00011
chr17.trna16-GlnTTG@11.33.23_2_12|Out	FDPS|2224	0.55	1.9e-07	0.00011
chr13.trna5-GluTTC@1.22.22_1_2	EML3|256364	0.55	1.9e-07	0.00011
chr1.trna35-GlyGCC@1.29.29_1_5	GART|2618	0.55	1.9e-07	0.00011
chr1.trna111-HisGTG@8.31.24_1_10	PLD5|200150	0.55	1.9e-07	0.00011
chr14.trna18-TyrGTA@1.25.25_1_8|Out	PPP5C|5536	0.55	1.9e-07	0.00011
chr1.trna111-HisGTG@5.30.26_1_10|Out	IDH1|3417	0.549	1.9e-07	0.00011
chr1.trna111-HisGTG@3.30.28_1_9	PNPT1|87178	0.549	1.9e-07	0.00011
chr1.trna35-GlyGCC@1.30.30_1_5	YIF1A|10897	0.549	1.9e-07	0.00011
chr17.trna16-GlnTTG@8.30.23_2_13|Out	PHF5A|84844	0.549	1.9e-07	0.00011
chr14.trna18-TyrGTA@1.25.25_1_8|Out	FLJ10357|55701	0.549	1.9e-07	0.00011
chr1.trna35-GlyGCC@12.32.21_4_18|Out	CYP51A1|1595	0.549	1.9e-07	0.00011
chr17.trna18-ArgCCT@1.19.19_1_3	TRA2A|29896	0.549	1.9e-07	0.00011
chr17.trna16-GlnTTG@11.33.23_2_12|Out	SLC31A1|1317	0.549	1.9e-07	0.00011
chr16.trna11-ProAGG@1.30.30_3_18|Out	IDH1|3417	0.549	1.9e-07	0.00011
chr1.trna68-GlyGCC@1.29.29_2_10|Out	BACE1|23621	0.549	1.9e-07	0.00011
chr17.trna18-ArgCCT@1.19.19_1_3	C9orf142|286257	0.549	1.9e-07	0.00011
chr15.trna7-GlnCTG@11.34.24_1_7|Out	POLD2|5425	0.549	2e-07	0.00011
chr1.trna116-GluCTC@1.28.28_1_8|Out	MOBKL3|25843	0.549	2e-07	0.00011
chr1.trna68-GlyGCC@1.29.29_2_10|Out	RAN|5901	0.549	2e-07	0.00012
chr1.trna68-GlyGCC@3.29.27_2_10|Out	PPM1G|5496	0.549	2e-07	0.00012
chr1.trna68-GlyGCC@3.29.27_2_10|Out	RHOB|388	0.549	2e-07	0.00012
chr17.trna16-GlnTTG@16.31.16_2_12|Out	YIF1A|10897	0.549	2e-07	0.00012
chr1.trna116-GluCTC@1.29.29_1_8|Out	GREB1|9687	0.549	2e-07	0.00012
chr1.trna35-GlyGCC@1.23.23_1_5|Out	ALDH1B1|219	0.548	2e-07	0.00012
chr1.trna35-GlyGCC@1.28.28_1_5	DOLPP1|57171	0.548	2e-07	0.00012
chr1.trna68-GlyGCC@3.29.27_2_10|Out	LSM4|25804	0.548	2e-07	0.00012
chr14.trna18-TyrGTA@1.23.23_1_8|Out	UBE3C|9690	0.548	2e-07	0.00012
chr17.trna19-ArgTCG@1.19.19_1_1	KRTCAP2|200185	0.548	2e-07	0.00012
chr1.trna35-GlyGCC@1.22.22_1_5|Out	MRPL4|51073	0.548	2e-07	0.00012
chr1.trna111-HisGTG@8.29.22_1_10|Out	AAGAB|79719	0.548	2.1e-07	0.00012
chr1.trna69-AspGTC@51.73C.23_1_12	RNF216L|441191	0.548	2.1e-07	0.00012
chr1.trna116-GluCTC@1.28.28_1_8|Out	GREB1|9687	0.548	2.1e-07	0.00012
chr17.trna16-GlnTTG@17.33.17_2_12|Out	CD83|9308	0.548	2.1e-07	0.00012
chr1.trna86-ArgTCT@1.19.19_1_1	GLA|2717	0.548	2.1e-07	0.00012
chr1.trna111-HisGTG@35.56.22_1_10	CCDC69|26112	0.548	2.1e-07	0.00012
chr1.trna35-GlyGCC@1.27.27_1_5|Out	DOLPP1|57171	0.548	2.1e-07	0.00012
chr6.trna108-AlaAGC@58.75CCA.18_1_1	ALDH1B1|219	0.548	2.1e-07	0.00012
chr1.trna35-GlyGCC@1.28.28_1_5	TYRO3|7301	0.548	2.1e-07	0.00012
chr17.trna18-ArgCCT@1.19.19_1_3	C19orf53|28974	0.548	2.1e-07	0.00012
chr1.trna116-GluCTC@51.75CCA.25_3_11	LRP11|84918	0.548	2.1e-07	0.00012
chr1.trna35-GlyGCC@1.28.28_1_5	SRP9|6726	0.548	2.1e-07	0.00012
chr1.trna68-GlyGCC@1.29.29_2_10|Out	LDLR|3949	0.548	2.1e-07	0.00012
chr1.trna35-GlyGCC@1.29.29_1_5	IMMT|10989	0.548	2.1e-07	0.00012
chr1.trna35-GlyGCC@1.27.27_1_5|Out	PRPF4|9128	0.547	2.2e-07	0.00012
chr1.trna111-HisGTG@3.30.28_1_9	RTCD1|8634	0.547	2.2e-07	0.00012
chr1.trna111-HisGTG@11.34.24_1_9	ALKBH6|84964	0.547	2.2e-07	0.00012
chr2.trna2-TyrGTA@59.76CCA.18_1_7	YIF1A|10897	0.547	2.2e-07	0.00012
chr1.trna9-ArgTCT@1.19.19_1_1	PFDN6|10471	0.547	2.2e-07	0.00012
chr1.trna35-GlyGCC@1.28.28_1_5	RHOB|388	0.547	2.2e-07	0.00013
chr6.trna10-AlaCGC@1.23.23_3_8	RDH11|51109	0.547	2.2e-07	0.00013
chr14.trna7-ArgACG@1.19.19_1_7|Out	ARV1|64801	0.547	2.2e-07	0.00013
chr1.trna111-HisGTG@8.29.22_1_10|Out	YIF1A|10897	0.547	2.2e-07	0.00013
chr15.trna7-GlnCTG@11.34.24_1_7|Out	GLO1|2739	0.547	2.3e-07	0.00013
chr1.trna35-GlyGCC@1.29.29_1_5	SMAD2|4087	0.546	2.3e-07	0.00013
chr1.trna35-GlyGCC@1.27.27_1_5|Out	TLE1|7088	0.546	2.3e-07	0.00013
chr1.trna116-GluCTC@52.75CCA.24_3_13	GGCT|79017	0.546	2.3e-07	0.00013
chr1.trna68-GlyGCC@1.29.29_2_10|Out	NCLN|56926	0.546	2.3e-07	0.00013
chr1.trna111-HisGTG@8.31.24_1_10	IDH1|3417	0.546	2.3e-07	0.00013
chr1.trna35-GlyGCC@1.30.30_1_5	CD83|9308	0.546	2.3e-07	0.00013
chr1.trna35-GlyGCC@1.29.29_1_5	HMGCS1|3157	0.546	2.3e-07	0.00013
chr1.trna68-GlyGCC@3.30.28_2_10|Out	TMEM18|129787	0.546	2.3e-07	0.00013
chr2.trna2-TyrGTA@59.76CCA.18_1_7	CECR5|27440	0.546	2.3e-07	0.00013
chr13.trna3-GluTTC@1.22.22_1_2	ASB7|140460	0.546	2.3e-07	0.00013
chr16.trna11-ProAGG@1.25.25_3_19|Out	SLC26A6|65010	0.546	2.3e-07	0.00013
chr6.trna10-AlaCGC@1.22.22_3_8	EIF2S1|1965	0.546	2.3e-07	0.00013
chr1.trna111-HisGTG@8.31.24_1_10	POR|5447	0.546	2.3e-07	0.00013
chr17.trna16-GlnTTG@11.33.23_2_12|Out	AACS|65985	0.546	2.3e-07	0.00013
chr1.trna111-HisGTG@8.31.24_1_10	DBF4|10926	0.546	2.3e-07	0.00013
chr1.trna68-GlyGCC@1.29.29_2_10|Out	AAMP|14	0.546	2.4e-07	0.00013
chr1.trna111-HisGTG@5.30.26_1_10|Out	YIF1A|10897	0.546	2.4e-07	0.00013
chr1.trna68-GlyGCC@3.29.27_2_10|Out	IDH1|3417	0.546	2.4e-07	0.00013
chr6.trna10-AlaCGC@1.22.22_3_8	LDLR|3949	0.546	2.4e-07	0.00013
chr17.trna16-GlnTTG@11.33.23_2_12|Out	GREB1|9687	0.546	2.4e-07	0.00013
chr6.trna110-AlaTGC@59.75CCA.17_2_5	SLC27A4|10999	0.546	2.4e-07	0.00013
chr17.trna19-ArgTCG@1.19.19_1_1	UBL5|59286	0.546	2.4e-07	0.00013
chr3.trna7-CysGCA@1.29.29_1_1	FAM174A|345757	0.546	2.4e-07	0.00013
chr1.trna116-GluCTC@1.29.29_1_8|Out	GLO1|2739	0.546	2.4e-07	0.00013
chr15.trna4-ArgTCG@1.19.19_2_4	KRTCAP2|200185	0.546	2.4e-07	0.00013
chr6.trna110-AlaTGC@59.75CCA.17_2_5	DOLK|22845	0.546	2.4e-07	0.00013
chr1.trna47-AsnGTT@36.58.23_1_10	USP5|8078	0.546	2.4e-07	0.00013
chr1.trna35-GlyGCC@1.29.29_1_5	BACE1|23621	0.545	2.4e-07	0.00013
chr1.trna35-GlyGCC@1.28.28_1_5	TLE1|7088	0.545	2.4e-07	0.00013
chr1.trna111-HisGTG@8.29.22_1_10|Out	EIF3J|8669	0.545	2.4e-07	0.00013
chr15.trna7-GlnCTG@29.53.25_1_11	YIF1A|10897	0.545	2.5e-07	0.00013
chr1.trna116-GluCTC@1.29.29_1_8|Out	YWHAQ|10971	0.545	2.5e-07	0.00013
chr1.trna111-HisGTG@9.29.21_1_10|Out	DPH2|1802	0.545	2.5e-07	0.00014
chr7.trna5-CysGCA@10.33.24_1_7|Out	NPTX1|4884	0.545	2.5e-07	0.00014
chr17.trna18-ArgCCT@1.19.19_1_3	NDUFA3|4696	0.545	2.5e-07	0.00014
chr1.trna68-GlyGCC@1.28.28_2_10|Out	SLC31A1|1317	0.545	2.5e-07	0.00014
chr15.trna7-GlnCTG@11.34.24_1_7|Out	RARS2|57038	0.545	2.5e-07	0.00014
chr1.trna35-GlyGCC@1.29.29_1_5	MED8|112950	0.545	2.5e-07	0.00014
chr14.trna18-TyrGTA@1.23.23_1_8|Out	SEC24A|10802	0.545	2.6e-07	0.00014
chr1.trna111-HisGTG@8.29.22_1_10|Out	CD83|9308	0.545	2.6e-07	0.00014
chr1.trna111-HisGTG@5.30.26_1_10|Out	CYP51A1|1595	0.545	2.6e-07	0.00014
chr1.trna111-HisGTG@8.29.22_1_10|Out	CHCHD2|51142	0.544	2.6e-07	0.00014
chr6.trna10-AlaCGC@1.23.23_3_8	FOLH1|2346	0.544	2.6e-07	0.00014
chr1.trna111-HisGTG@9.31.23_1_10	SLC16A1|6566	0.544	2.6e-07	0.00014
chr1.trna111-HisGTG@-1T.22.23_1_9	ISLR|3671	0.544	2.6e-07	0.00014
chr1.trna111-HisGTG@16.33.18_1_9	ORC5L|5001	0.544	2.6e-07	0.00014
chr1.trna111-HisGTG@16.34.19_1_9	GLA|2717	0.544	2.6e-07	0.00014
chr1.trna111-HisGTG@8.31.24_1_10	ACP1|52	0.544	2.6e-07	0.00014
chr1.trna111-HisGTG@-1T.29.30_1_9	LSM4|25804	0.544	2.6e-07	0.00014
chr15.trna7-GlnCTG@11.34.24_1_7|Out	MOBKL3|25843	0.544	2.6e-07	0.00014
chr6.trna10-AlaCGC@1.19.19_3_8	POR|5447	0.544	2.6e-07	0.00014
chr1.trna111-HisGTG@15.34.20_1_9	GLA|2717	0.544	2.6e-07	0.00014
chr1.trna111-HisGTG@9.31.23_1_10	R3HDM1|23518	0.544	2.6e-07	0.00014
chr17.trna16-GlnTTG@8.31.24_2_12|Out	HNRNPM|4670	0.544	2.7e-07	0.00014
chr1.trna111-HisGTG@16.33.18_1_9	PES1|23481	0.544	2.7e-07	0.00014
chr1.trna111-HisGTG@9.29.21_1_10|Out	EIF3J|8669	0.544	2.7e-07	0.00014
chr14.trna7-ArgACG@1.19.19_1_7|Out	NDUFA7|4701	0.544	2.7e-07	0.00014
chr1.trna111-HisGTG@11.34.24_1_9	TPRKB|51002	0.544	2.7e-07	0.00014
chr1.trna111-HisGTG@-1T.23.24_1_9	SUSD2|56241	0.544	2.7e-07	0.00014
chr1.trna35-GlyGCC@1.27.27_1_5|Out	TMEM120B|144404	0.543	2.7e-07	0.00014
chr1.trna68-GlyGCC@1.29.29_2_10|Out	ACLY|47	0.543	2.7e-07	0.00014
chr1.trna68-GlyGCC@1.29.29_2_10|Out	POR|5447	0.543	2.7e-07	0.00014
chr1.trna111-HisGTG@9.31.23_1_10	FARSB|10056	0.543	2.7e-07	0.00014
chr1.trna35-GlyGCC@19.39.21_1_12	GSTT2|2953	0.543	2.7e-07	0.00014
chr1.trna111-HisGTG@8.29.22_1_10|Out	GMNN|51053	0.543	2.8e-07	0.00015
chr6.trna108-AlaAGC@58.75CCA.18_1_1	SLC27A4|10999	0.543	2.8e-07	0.00015
chr1.trna111-HisGTG@5.30.26_1_10|Out	PNPT1|87178	0.543	2.8e-07	0.00015
chr1.trna68-GlyGCC@1.29.29_2_10|Out	RAB4A|5867	0.543	2.8e-07	0.00015
chr1.trna35-GlyGCC@1.27.27_1_5|Out	LSM4|25804	0.543	2.8e-07	0.00015
chr17.trna18-ArgCCT@1.19.19_1_3	POP7|10248	0.543	2.9e-07	0.00015
chr17.trna18-ArgCCT@1.19.19_1_3	UBL5|59286	0.543	2.9e-07	0.00015
chr1.trna111-HisGTG@-1A.23.24_1_9	NGFR|4804	0.543	2.9e-07	0.00015
chr1.trna111-HisGTG@8.31.24_1_10	EIF3B|8662	0.543	2.9e-07	0.00015
chr1.trna35-GlyGCC@1.29.29_1_5	RAB4A|5867	0.543	2.9e-07	0.00015
chr1.trna111-HisGTG@9.29.21_1_10|Out	NCLN|56926	0.543	2.9e-07	0.00015
chr1.trna111-HisGTG@9.32.24_1_9	ELOVL1|64834	0.542	2.9e-07	0.00015
chr15.trna7-GlnCTG@11.34.24_1_7|Out	TIMM17A|10440	0.542	2.9e-07	0.00015
chr1.trna35-GlyGCC@1.27.27_1_5|Out	SLC27A4|10999	0.542	2.9e-07	0.00015
chr15.trna7-GlnCTG@12.34.23_1_7|Out	ACP1|52	0.542	2.9e-07	0.00015
chr1.trna35-GlyGCC@1.29.29_1_5	ORC5L|5001	0.542	2.9e-07	0.00015
chr1.trna116-GluCTC@1.29.29_1_8|Out	FDPS|2224	0.542	3e-07	0.00015
chr13.trna3-GluTTC@1.23.23_1_2	NUS1|116150	0.542	3e-07	0.00015
chr1.trna116-GluCTC@52.75CCA.24_3_13	PPIL5|122769	0.542	3e-07	0.00015
chr15.trna7-GlnCTG@11.34.24_1_7|Out	RAN|5901	0.542	3e-07	0.00015
chr1.trna35-GlyGCC@1.29.29_1_5	POLD2|5425	0.542	3e-07	0.00015
chr13.trna3-GluTTC@1.23.23_1_2	RCN2|5955	0.542	3e-07	0.00015
chr6.trna10-AlaCGC@1.19.19_3_8	CALM2|805	0.542	3e-07	0.00015
chr2.trna2-TyrGTA@59.76CCA.18_1_7	NIPA2|81614	0.542	3e-07	0.00015
chr1.trna111-HisGTG@9.31.23_1_10	SMAD2|4087	0.542	3e-07	0.00015
chr1.trna111-HisGTG@9.29.21_1_10|Out	LSM4|25804	0.542	3e-07	0.00015
chr1.trna111-HisGTG@9.29.21_1_10|Out	SCARB1|949	0.542	3e-07	0.00015
chr1.trna111-HisGTG@9.29.21_1_10|Out	PTPRF|5792	0.542	3e-07	0.00016
chr1.trna35-GlyGCC@1.30.30_1_5	EPT1|85465	0.542	3.1e-07	0.00016
chr6.trna10-AlaCGC@1.23.23_3_8	BNIP3|664	0.541	3.1e-07	0.00016
chr1.trna111-HisGTG@8.31.24_1_10	HSPD1|3329	0.541	3.1e-07	0.00016
chr1.trna111-HisGTG@9.31.23_1_10	AAMP|14	0.541	3.1e-07	0.00016
chr6.trna10-AlaCGC@1.23.23_3_8	MRPL4|51073	0.541	3.1e-07	0.00016
chr6.trna10-AlaCGC@1.23.23_3_8	FASN|2194	0.541	3.1e-07	0.00016
chr1.trna35-GlyGCC@1.27.27_1_5|Out	IDH1|3417	0.541	3.1e-07	0.00016
chr15.trna7-GlnCTG@29.53.25_1_11	HNRNPM|4670	0.541	3.1e-07	0.00016
chr1.trna35-GlyGCC@1.29.29_1_5	FBXL18|80028	0.541	3.1e-07	0.00016
chr17.trna42-LeuTAG@1.20.20_2_9	EPT1|85465	0.541	3.1e-07	0.00016
chr15.trna7-GlnCTG@11.34.24_1_7|Out	GREB1|9687	0.541	3.1e-07	0.00016
chr1.trna116-GluCTC@1.28.28_1_8|Out	GLO1|2739	0.541	3.1e-07	0.00016
chr17.trna19-ArgTCG@1.19.19_1_1	POP7|10248	0.541	3.1e-07	0.00016
chr1.trna68-GlyGCC@1.29.29_2_10|Out	TIPRL|261726	0.541	3.1e-07	0.00016
chr1.trna35-GlyGCC@1.29.29_1_5	PPIL5|122769	0.541	3.1e-07	0.00016
chr1.trna111-HisGTG@9.29.21_1_10|Out	NPTX1|4884	0.541	3.2e-07	0.00016
chr19.trna2-GlyTCC@28.53.26_1_8	FTSJ2|29960	0.541	3.2e-07	0.00016
chr15.trna7-GlnCTG@10.34.25_1_7|Out	ACP1|52	0.541	3.2e-07	0.00016
chr1.trna111-HisGTG@3.30.28_1_9	DPH3|285381	0.541	3.2e-07	0.00016
chr1.trna68-GlyGCC@1.29.29_2_10|Out	DCUN1D5|84259	0.541	3.2e-07	0.00016
chr1.trna111-HisGTG@8.31.24_1_10	MRPL4|51073	0.541	3.2e-07	0.00016
chr6.trna108-AlaAGC@58.75CCA.18_1_1	CHEK2|11200	0.541	3.2e-07	0.00016
chr1.trna35-GlyGCC@1.29.29_1_5	ZC3H15|55854	0.541	3.2e-07	0.00016
chr1.trna35-GlyGCC@19.39.21_1_12	SELS|55829	0.541	3.2e-07	0.00016
chr17.trna19-ArgTCG@1.19.19_1_1	CCDC107|203260	0.541	3.2e-07	0.00016
chr1.trna35-GlyGCC@1.30.30_1_5	PTPRF|5792	0.541	3.2e-07	0.00016
chr1.trna47-AsnGTT@1.20.20_2_19	ACP1|52	0.541	3.2e-07	0.00016
chr17.trna16-GlnTTG@11.33.23_2_12|Out	RHOB|388	0.541	3.2e-07	0.00016
chr17.trna16-GlnTTG@11.33.23_2_12|Out	ACAT2|39	0.541	3.2e-07	0.00016
chr14.trna7-ArgACG@1.19.19_1_7|Out	RBX1|9978	0.541	3.3e-07	0.00016
chr17.trna42-LeuTAG@1.22.22_2_9	POLD2|5425	0.541	3.3e-07	0.00016
chr6.trna10-AlaCGC@1.23.23_3_8	POMT2|29954	0.54	3.3e-07	0.00016
chr17.trna18-ArgCCT@1.19.19_1_3	INO80E|283899	0.54	3.3e-07	0.00016
chr1.trna111-HisGTG@9.29.21_1_10|Out	GLO1|2739	0.54	3.3e-07	0.00016
chr2.trna2-TyrGTA@59.76CCA.18_1_7	RRM1|6240	0.54	3.3e-07	0.00016
chr1.trna111-HisGTG@1.30.30_1_9	UBE2M|9040	0.54	3.3e-07	0.00016
chr17.trna16-GlnTTG@17.33.17_2_12|Out	PNPT1|87178	0.54	3.3e-07	0.00016
chr1.trna116-GluCTC@1.29.29_1_8|Out	RTCD1|8634	0.54	3.3e-07	0.00016
chr1.trna35-GlyGCC@1.29.29_1_5	ARL4A|10124	0.54	3.3e-07	0.00016
chr1.trna111-HisGTG@8.34.27_1_9	GLA|2717	0.54	3.3e-07	0.00016
chr17.trna42-LeuTAG@1.20.20_2_9	ELOVL1|64834	0.54	3.3e-07	0.00016
chr1.trna35-GlyGCC@1.29.29_1_5	CBX3|11335	0.54	3.3e-07	0.00017
chr1.trna111-HisGTG@13.34.22_1_9	PDE6D|5147	0.54	3.4e-07	0.00017
chr1.trna35-GlyGCC@3.30.28_1_5	RAN|5901	0.54	3.4e-07	0.00017
chr6.trna10-AlaCGC@1.22.22_3_8	GMNN|51053	0.54	3.4e-07	0.00017
chr1.trna35-GlyGCC@1.28.28_1_5	TMEM120B|144404	0.54	3.4e-07	0.00017
chr1.trna111-HisGTG@8.29.22_1_10|Out	IDI1|3422	0.54	3.4e-07	0.00017
chr1.trna35-GlyGCC@3.30.28_1_5	ACP1|52	0.54	3.4e-07	0.00017
chr1.trna116-GluCTC@1.29.29_1_8|Out	DPH2|1802	0.54	3.4e-07	0.00017
chr1.trna68-GlyGCC@3.27.25_2_10|Out	DMAP1|55929	0.54	3.4e-07	0.00017
chr1.trna35-GlyGCC@1.29.29_1_5	DCUN1D5|84259	0.54	3.4e-07	0.00017
chr14.trna18-TyrGTA@1.25.25_1_8|Out	ZNF616|90317	0.54	3.5e-07	0.00017
chr6.trna10-AlaCGC@58.75CCA.18_2_7	IFI27|3429	0.539	3.5e-07	0.00017
chr7.trna5-CysGCA@7.32.26_2_7|Out	ELOVL1|64834	0.539	3.5e-07	0.00017
chr6.trna110-AlaTGC@1.19.19_5_13	PLD5|200150	0.539	3.5e-07	0.00017
chr15.trna7-GlnCTG@29.53.25_1_11	PGAM1|5223	0.539	3.5e-07	0.00017
chr17.trna19-ArgTCG@1.19.19_1_1	GNL2|29889	0.539	3.5e-07	0.00017
chr1.trna111-HisGTG@5.30.26_1_10|Out	DPH2|1802	0.539	3.5e-07	0.00017
chr1.trna9-ArgTCT@1.19.19_1_1	CCDC107|203260	0.539	3.5e-07	0.00017
chr1.trna35-GlyGCC@1.28.28_1_5	YIF1A|10897	0.539	3.5e-07	0.00017
chr1.trna9-ArgTCT@1.19.19_1_1	RBX1|9978	0.539	3.5e-07	0.00017
chr6.trna110-AlaTGC@1.19.19_5_13	HMGCR|3156	0.539	3.6e-07	0.00017
chr6.trna10-AlaCGC@1.23.23_3_8	SC4MOL|6307	0.539	3.6e-07	0.00017
chr17.trna42-LeuTAG@1.22.22_2_9	TYRO3|7301	0.539	3.6e-07	0.00017
chr7.trna5-CysGCA@10.33.24_1_7|Out	CD83|9308	0.539	3.6e-07	0.00017
chr1.trna35-GlyGCC@1.29.29_1_5	SOAT1|6646	0.539	3.6e-07	0.00017
chr15.trna7-GlnCTG@11.34.24_1_7|Out	CEBPZ|10153	0.539	3.6e-07	0.00017
chr1.trna68-GlyGCC@1.28.28_2_10|Out	SRP9|6726	0.539	3.6e-07	0.00017
chr7.trna5-CysGCA@9.32.24_2_8|Out	CYP51A1|1595	0.539	3.6e-07	0.00017
chr5.trna15-ValAAC@1.20.20_1_1	FAM174A|345757	0.539	3.6e-07	0.00018
chr1.trna32-MetCAT@34.56.23_1_8	YIF1A|10897	0.539	3.7e-07	0.00018
chr17.trna19-ArgTCG@1.19.19_1_1	EDF1|8721	0.538	3.7e-07	0.00018
chr1.trna111-HisGTG@8.34.27_1_9	NDUFA7|4701	0.538	3.7e-07	0.00018
chr6.trna10-AlaCGC@1.23.23_3_8	PLD5|200150	0.538	3.7e-07	0.00018
chr1.trna111-HisGTG@16.31.16_1_10|Out	POR|5447	0.538	3.7e-07	0.00018
chr6.trna10-AlaCGC@1.22.22_3_8	RAN|5901	0.538	3.7e-07	0.00018
chr1.trna68-GlyGCC@3.29.27_2_10|Out	FARSB|10056	0.538	3.7e-07	0.00018
chr15.trna7-GlnCTG@11.34.24_1_7|Out	TYRO3|7301	0.538	3.7e-07	0.00018
chr1.trna111-HisGTG@8.31.24_1_10	TYRO3|7301	0.538	3.7e-07	0.00018
chr1.trna111-HisGTG@8.30.23_1_10|Out	EPT1|85465	0.538	3.7e-07	0.00018
chr6.trna10-AlaCGC@58.75CCA.18_2_7	YIF1A|10897	0.538	3.8e-07	0.00018
chr1.trna35-GlyGCC@1.29.29_1_5	PNPT1|87178	0.538	3.8e-07	0.00018
chr13.trna3-GluTTC@1.24.24_1_2	NIPA2|81614	0.538	3.8e-07	0.00018
chr14.trna18-TyrGTA@1.25.25_1_8|Out	MTHFD1|4522	0.538	3.8e-07	0.00018
chr17.trna19-ArgTCG@1.19.19_1_1	PFDN6|10471	0.538	3.8e-07	0.00018
chr17.trna18-ArgCCT@35.54.20_1_5	SELS|55829	0.538	3.8e-07	0.00018
chr15.trna4-ArgTCG@1.19.19_2_4	SERF2|10169	0.538	3.9e-07	0.00018
chr1.trna111-HisGTG@9.29.21_1_10|Out	E2F6|1876	0.538	3.9e-07	0.00018
chr17.trna16-GlnTTG@9.33.25_2_12|Out	GLO1|2739	0.538	3.9e-07	0.00018
chr7.trna5-CysGCA@10.33.24_1_7|Out	RHOB|388	0.538	3.9e-07	0.00018
chr1.trna35-GlyGCC@1.28.28_1_5	SLC27A4|10999	0.538	3.9e-07	0.00018
chr13.trna3-GluTTC@1.24.24_1_2	EIF3J|8669	0.538	3.9e-07	0.00018
chr2.trna2-TyrGTA@59.76CCA.18_1_7	EIF4A3|9775	0.538	3.9e-07	0.00018
chr1.trna111-HisGTG@5.30.26_1_10|Out	SRP9|6726	0.537	3.9e-07	0.00018
chr1.trna111-HisGTG@-1A.23.24_1_9	IGFBP5|3488	0.537	3.9e-07	0.00018
chr17.trna18-ArgCCT@1.19.19_1_3	MAGOH|4116	0.537	3.9e-07	0.00018
chr19.trna2-GlyTCC@28.53.26_1_8	RAET1G|353091	0.537	3.9e-07	0.00018
chr6.trna108-AlaAGC@58.75CCA.18_1_1	SLC31A1|1317	0.537	3.9e-07	0.00018
chr1.trna35-GlyGCC@1.22.22_1_5|Out	CHEK2|11200	0.537	3.9e-07	0.00018
chr14.trna13-LysCTT@1.30.30_1_3	COPS7B|64708	0.537	4e-07	0.00019
chr1.trna35-GlyGCC@1.29.29_1_5	NSDHL|50814	0.537	4e-07	0.00019
chr1.trna111-HisGTG@5.30.26_1_10|Out	NOL10|79954	0.537	4e-07	0.00019
chr1.trna111-HisGTG@-1T.21.22_1_9	GGT5|2687	0.537	4e-07	0.00019
chr1.trna35-GlyGCC@1.30.30_1_5	SCARB1|949	0.537	4e-07	0.00019
chr1.trna35-GlyGCC@1.30.30_1_5	EIF2S1|1965	0.537	4e-07	0.00019
chr17.trna16-GlnTTG@11.33.23_2_12|Out	HMGCR|3156	0.537	4e-07	0.00019
chr17.trna19-ArgTCG@1.19.19_1_1	C19orf53|28974	0.537	4e-07	0.00019
chr15.trna7-GlnCTG@11.34.24_1_7|Out	MED8|112950	0.537	4e-07	0.00019
chr14.trna7-ArgACG@1.19.19_1_7|Out	PFDN6|10471	0.537	4e-07	0.00019
chr1.trna111-HisGTG@16.33.18_1_9	EIF3B|8662	0.537	4e-07	0.00019
chr1.trna35-GlyGCC@3.30.28_1_5	TMEM18|129787	0.537	4e-07	0.00019
chr6.trna10-AlaCGC@1.23.23_3_8	PDXP|57026	0.537	4e-07	0.00019
chr17.trna42-LeuTAG@68.85CCA.18_2_11	DOLK|22845	0.537	4e-07	0.00019
chr17.trna16-GlnTTG@11.33.23_2_12|Out	POLD2|5425	0.537	4.1e-07	0.00019
chr17.trna16-GlnTTG@8.33.26_2_12|Out	SLC31A1|1317	0.537	4.1e-07	0.00019
chr17.trna16-GlnTTG@37.58.22_2_10	MMAB|326625	0.537	4.1e-07	0.00019
chr17.trna16-GlnTTG@11.33.23_2_12|Out	STRAP|11171	0.537	4.1e-07	0.00019
chr1.trna111-HisGTG@9.31.23_1_10	YIPF4|84272	0.537	4.1e-07	0.00019
chr14.trna13-LysCTT@1.30.30_1_3	SRP9|6726	0.537	4.1e-07	0.00019
chr1.trna9-ArgTCT@1.19.19_1_1	PSENEN|55851	0.537	4.1e-07	0.00019
chr14.trna18-TyrGTA@1.23.23_1_8|Out	UTP15|84135	0.536	4.1e-07	0.00019
chr1.trna111-HisGTG@8.31.24_1_10	LTB4R|1241	0.536	4.1e-07	0.00019
chr1.trna35-GlyGCC@1.23.23_1_5|Out	KCNJ8|3764	0.536	4.1e-07	0.00019
chr17.trna18-ArgCCT@1.19.19_1_3	PABPN1|8106	0.536	4.1e-07	0.00019
chr1.trna69-AspGTC@51.75CCA.25_1_12	XPO5|57510	0.536	4.2e-07	0.00019
chr1.trna111-HisGTG@9.29.21_1_10|Out	YIF1A|10897	0.536	4.2e-07	0.00019
chr1.trna111-HisGTG@9.29.21_1_10|Out	SOAT1|6646	0.536	4.2e-07	0.00019
chr6.trna10-AlaCGC@1.23.23_3_8	SLC31A1|1317	0.536	4.2e-07	0.00019
chr14.trna18-TyrGTA@1.25.25_1_8|Out	UTP15|84135	0.536	4.2e-07	0.00019
chr1.trna111-HisGTG@3.30.28_1_9	EPT1|85465	0.536	4.2e-07	0.00019
chr1.trna111-HisGTG@8.31.24_1_10	PPIL5|122769	0.536	4.2e-07	0.00019
chr2.trna2-TyrGTA@59.76CCA.18_1_7	PDIA6|10130	0.536	4.3e-07	0.0002
chr6.trna110-AlaTGC@1.19.19_5_13	RARS2|57038	0.536	4.3e-07	0.0002
chr1.trna111-HisGTG@8.30.23_1_10|Out	NIPA2|81614	0.536	4.3e-07	0.0002
chr1.trna34-LeuCAG@1.25.25_1_9|Out	KCNJ8|3764	0.536	4.3e-07	0.0002
chr14.trna18-TyrGTA@1.25.25_1_8|Out	PPIL5|122769	0.536	4.3e-07	0.0002
chr1.trna47-AsnGTT@36.58.23_1_10	GM2A|2760	0.536	4.3e-07	0.0002
chr16.trna11-ProAGG@1.30.30_3_18|Out	FARSB|10056	0.536	4.3e-07	0.0002
chr2.trna2-TyrGTA@59.76CCA.18_1_7	CRAT|1384	0.536	4.3e-07	0.0002
chr1.trna117-GlyTCC@1.30.30_1_6|Out	SRP9|6726	0.536	4.3e-07	0.0002
chr6.trna110-AlaTGC@1.24.24_5_13	GMNN|51053	0.536	4.3e-07	0.0002
chr1.trna111-HisGTG@35.56.22_1_10	FAM54B|56181	0.536	4.3e-07	0.0002
chr1.trna111-HisGTG@8.31.24_1_10	ATF5|22809	0.536	4.3e-07	0.0002
chr17.trna16-GlnTTG@11.33.23_2_12|Out	POR|5447	0.536	4.3e-07	0.0002
chr1.trna111-HisGTG@11.34.24_1_9	MRPL41|64975	0.536	4.4e-07	0.0002
chr6.trna110-AlaTGC@1.19.19_5_13	SLC30A10|55532	0.535	4.4e-07	0.0002
chr17.trna18-ArgCCT@1.19.19_1_3	DRAP1|10589	0.535	4.4e-07	0.0002
chr1.trna99-ValCAC@1.30.30_2_2	TIMM17A|10440	0.535	4.4e-07	0.0002
chr19.trna2-GlyTCC@28.53.26_1_8	TAP2|6891	0.535	4.4e-07	0.0002
chr17.trna16-GlnTTG@9.33.25_2_12|Out	CYP51A1|1595	0.535	4.4e-07	0.0002
chr6.trna10-AlaCGC@1.19.19_3_8	PLD5|200150	0.535	4.5e-07	0.0002
chr17.trna42-LeuTAG@1.22.22_2_9	ARL4A|10124	0.535	4.5e-07	0.0002
chr1.trna111-HisGTG@1.30.30_1_9	PTS|5805	0.535	4.5e-07	0.0002
chr1.trna111-HisGTG@8.29.22_1_10|Out	HMGCS1|3157	0.535	4.5e-07	0.0002
chr6.trna110-AlaTGC@59.75CCA.17_2_5	CDKN2B|1030	0.535	4.5e-07	0.0002
chr15.trna7-GlnCTG@11.34.24_1_7|Out	C6orf153|88745	0.535	4.5e-07	0.0002
chr1.trna116-GluCTC@1.29.29_1_8|Out	FARSB|10056	0.535	4.5e-07	0.0002
chr1.trna111-HisGTG@8.29.22_1_10|Out	NOL10|79954	0.535	4.5e-07	0.0002
chr1.trna116-GluCTC@1.29.29_1_8|Out	CD83|9308	0.535	4.5e-07	0.0002
chr15.trna7-GlnCTG@11.34.24_1_7|Out	RHOB|388	0.535	4.5e-07	0.0002
chr13.trna3-GluTTC@1.22.22_1_2	ZFP106|64397	0.535	4.5e-07	0.0002
chr15.trna7-GlnCTG@1.29.29_1_7|Out	MAPKAP1|79109	0.535	4.6e-07	0.0002
chr17.trna16-GlnTTG@9.33.25_2_12|Out	GREB1|9687	0.535	4.6e-07	0.00021
chr6.trna10-AlaCGC@1.23.23_3_8	RHOB|388	0.535	4.6e-07	0.00021
chr1.trna111-HisGTG@8.30.23_1_10|Out	AIMP2|7965	0.535	4.6e-07	0.00021
chr1.trna47-AsnGTT@36.58.23_1_10	GNPDA1|10007	0.535	4.6e-07	0.00021
chr1.trna111-HisGTG@9.29.21_1_10|Out	ZC3H15|55854	0.534	4.7e-07	0.00021
chr1.trna68-GlyGCC@1.27.27_2_10|Out	LSM4|25804	0.534	4.7e-07	0.00021
chr1.trna111-HisGTG@8.31.24_1_10	CYP51A1|1595	0.534	4.7e-07	0.00021
chr6.trna10-AlaCGC@1.23.23_3_8	TIMM17A|10440	0.534	4.7e-07	0.00021
chr1.trna35-GlyGCC@1.30.30_1_5	GMNN|51053	0.534	4.7e-07	0.00021
chr1.trna116-GluCTC@52.75CCA.24_3_13	ARL4A|10124	0.534	4.7e-07	0.00021
chr1.trna68-GlyGCC@1.29.29_2_10|Out	C6orf153|88745	0.534	4.7e-07	0.00021
chr17.trna18-ArgCCT@1.19.19_1_3	USMG5|84833	0.534	4.7e-07	0.00021
chr6.trna110-AlaTGC@1.19.19_5_13	CBX3|11335	0.534	4.7e-07	0.00021
chr6.trna10-AlaCGC@1.22.22_3_8	NPTX1|4884	0.534	4.7e-07	0.00021
chr14.trna18-TyrGTA@1.25.25_1_8|Out	DHX29|54505	0.534	4.7e-07	0.00021
chr6.trna110-AlaTGC@1.19.19_5_13	SLC26A6|65010	0.534	4.7e-07	0.00021
chr1.trna116-GluCTC@1.29.29_1_8|Out	MSH6|2956	0.534	4.7e-07	0.00021
chr14.trna13-LysCTT@1.30.30_1_3	PTS|5805	0.534	4.7e-07	0.00021
chr1.trna111-HisGTG@8.29.22_1_10|Out	AACS|65985	0.534	4.8e-07	0.00021
chr1.trna34-LeuCAG@70.86CCA.17_1_7|Out	RAB4A|5867	0.534	4.8e-07	0.00021
chr6.trna110-AlaTGC@59.75CCA.17_2_5	C1GALT1|56913	0.534	4.8e-07	0.00021
chr1.trna35-GlyGCC@1.30.30_1_5	CYP51A1|1595	0.534	4.8e-07	0.00021
chr1.trna35-GlyGCC@1.29.29_1_5	SLC25A17|10478	0.534	4.8e-07	0.00021
chr7.trna5-CysGCA@10.33.24_1_7|Out	MRPL4|51073	0.534	4.8e-07	0.00021
chr1.trna111-HisGTG@15.35.21_1_9	ELOVL1|64834	0.534	4.8e-07	0.00021
chr17.trna4-ArgTCT@1.19.19_1_4|Out	PFDN6|10471	0.534	4.8e-07	0.00021
chr1.trna111-HisGTG@5.30.26_1_10|Out	SLC5A6|8884	0.534	4.8e-07	0.00021
chr1.trna111-HisGTG@9.31.23_1_10	CBX3|11335	0.534	4.9e-07	0.00021
chr6.trna110-AlaTGC@58.75CCA.18_2_5	SLC27A4|10999	0.534	4.9e-07	0.00021
chr1.trna86-ArgTCT@1.19.19_1_1	GEMIN6|79833	0.534	4.9e-07	0.00021
chr1.trna117-GlyTCC@1.23.23_1_7|Out	TIMM17A|10440	0.534	4.9e-07	0.00021
chr1.trna68-GlyGCC@1.27.27_2_10|Out	ACP1|52	0.534	4.9e-07	0.00021
chr17.trna4-ArgTCT@1.19.19_1_4|Out	ZMYND19|116225	0.534	4.9e-07	0.00021
chr1.trna111-HisGTG@9.29.21_1_10|Out	UBE2M|9040	0.533	4.9e-07	0.00022
chr1.trna32-MetCAT@34.56.23_1_8	ELOVL1|64834	0.533	4.9e-07	0.00022
chr1.trna35-GlyGCC@1.30.30_1_5	RAN|5901	0.533	5e-07	0.00022
chr16.trna11-ProAGG@1.30.30_3_18|Out	CYP51A1|1595	0.533	5e-07	0.00022
chr1.trna35-GlyGCC@1.23.23_1_5|Out	ARL4A|10124	0.533	5e-07	0.00022
chr15.trna7-GlnCTG@11.34.24_1_7|Out	EIF3J|8669	0.533	5e-07	0.00022
chr1.trna32-MetCAT@34.56.23_1_8	TACC3|10460	0.533	5e-07	0.00022
chr17.trna16-GlnTTG@12.33.22_2_12|Out	ELOVL1|64834	0.533	5e-07	0.00022
chr17.trna42-LeuTAG@1.20.20_2_9	IER3IP1|51124	0.533	5e-07	0.00022
chr1.trna111-HisGTG@9.29.21_1_10|Out	AAGAB|79719	0.533	5e-07	0.00022
chr1.trna111-HisGTG@8.29.22_1_10|Out	HMGCR|3156	0.533	5e-07	0.00022
chr17.trna42-LeuTAG@1.25.25_2_9	ELOVL1|64834	0.533	5.1e-07	0.00022
chr1.trna35-GlyGCC@1.29.29_1_5	HNRNPM|4670	0.533	5.1e-07	0.00022
chr14.trna13-LysCTT@1.30.30_1_3	E2F6|1876	0.533	5.1e-07	0.00022
chr1.trna111-HisGTG@5.30.26_1_10|Out	TIMM17A|10440	0.533	5.1e-07	0.00022
chr17.trna4-ArgTCT@1.19.19_1_4|Out	EIF5AL1|143244	0.533	5.1e-07	0.00022
chr6.trna108-AlaAGC@58.75CCA.18_1_1	C1GALT1|56913	0.533	5.1e-07	0.00022
chr1.trna116-GluCTC@51.75CCA.25_3_11	SLC31A1|1317	0.533	5.1e-07	0.00022
chr1.trna116-GluCTC@1.29.29_1_8|Out	NCLN|56926	0.533	5.1e-07	0.00022
chr1.trna68-GlyGCC@3.27.25_2_10|Out	MRPL50|54534	0.533	5.2e-07	0.00022
chr1.trna111-HisGTG@9.34.26_1_9	PDE6D|5147	0.533	5.2e-07	0.00022
chr1.trna9-ArgTCT@1.19.19_1_1	PFDN2|5202	0.533	5.2e-07	0.00022
chr1.trna34-LeuCAG@65.86CCA.22_1_7	HNRNPM|4670	0.533	5.2e-07	0.00022
chr17.trna42-LeuTAG@1.19.19_2_9	EIF3B|8662	0.532	5.2e-07	0.00022
chr1.trna32-MetCAT@35.56.22_1_8	UBE2K|3093	0.532	5.3e-07	0.00023
chr1.trna35-GlyGCC@1.29.29_1_5	EXTL2|2135	0.532	5.3e-07	0.00023
chr1.trna111-HisGTG@8.31.24_1_10	ARL4A|10124	0.532	5.3e-07	0.00023
chr1.trna35-GlyGCC@1.29.29_1_5	FDX1|2230	0.532	5.3e-07	0.00023
chr17.trna4-ArgTCT@1.19.19_1_4|Out	PTS|5805	0.532	5.3e-07	0.00023
chr6.trna110-AlaTGC@59.75CCA.17_2_5	NCBP1|4686	0.532	5.3e-07	0.00023
chr1.trna35-GlyGCC@1.22.22_1_5|Out	LTB4R|1241	0.532	5.3e-07	0.00023
chr1.trna116-GluCTC@1.29.29_1_8|Out	EPT1|85465	0.532	5.3e-07	0.00023
chr6.trna10-AlaCGC@1.23.23_3_8	PPFIA3|8541	0.532	5.3e-07	0.00023
chr17.trna42-LeuTAG@1.25.25_2_9	ERO1L|30001	0.532	5.3e-07	0.00023
chr1.trna35-GlyGCC@1.28.28_1_5	MRPL4|51073	0.532	5.3e-07	0.00023
chr1.trna35-GlyGCC@1.28.28_1_5	EIF2S1|1965	0.532	5.3e-07	0.00023
chr1.trna111-HisGTG@8.29.22_1_10|Out	LDLR|3949	0.532	5.4e-07	0.00023
chr1.trna111-HisGTG@-1T.29.30_1_9	PTS|5805	0.532	5.4e-07	0.00023
chr19.trna2-GlyTCC@28.53.26_1_8	SLC31A1|1317	0.532	5.4e-07	0.00023
chr7.trna5-CysGCA@9.32.24_2_8|Out	SLC31A1|1317	0.532	5.4e-07	0.00023
chr1.trna111-HisGTG@9.32.24_1_9	ACP1|52	0.532	5.4e-07	0.00023
chr1.trna111-HisGTG@9.31.23_1_10	RHOB|388	0.532	5.4e-07	0.00023
chr6.trna110-AlaTGC@1.19.19_5_13	CALM2|805	0.532	5.5e-07	0.00023
chr6.trna10-AlaCGC@1.23.23_3_8	TMEM120B|144404	0.532	5.5e-07	0.00023
chr1.trna111-HisGTG@13.34.22_1_9	LSM4|25804	0.532	5.5e-07	0.00023
chr1.trna111-HisGTG@5.30.26_1_10|Out	QSOX2|169714	0.532	5.5e-07	0.00023
chr1.trna111-HisGTG@8.31.24_1_10	EPRS|2058	0.532	5.5e-07	0.00023
chr17.trna4-ArgTCT@1.19.19_1_4|Out	MXD3|83463	0.532	5.5e-07	0.00023
chr17.trna23-ArgCCG@1.19.19_1_1|Out	EIF5A|1984	0.532	5.5e-07	0.00023
chr16.trna11-ProAGG@1.30.30_3_18|Out	SCARB1|949	0.532	5.5e-07	0.00023
chr1.trna86-ArgTCT@1.19.19_1_1	GGPS1|9453	0.532	5.5e-07	0.00023
chr1.trna111-HisGTG@9.29.21_1_10|Out	SELS|55829	0.532	5.5e-07	0.00023
chr6.trna110-AlaTGC@1.19.19_5_13	GREB1|9687	0.531	5.5e-07	0.00023
chr1.trna111-HisGTG@9.31.23_1_10	YIF1A|10897	0.531	5.6e-07	0.00023
chr1.trna111-HisGTG@8.30.23_1_10|Out	PDXP|57026	0.531	5.6e-07	0.00023
chr16.trna11-ProAGG@1.25.25_3_19|Out	GREB1|9687	0.531	5.6e-07	0.00023
chr17.trna42-LeuTAG@1.20.20_2_9	IDH1|3417	0.531	5.6e-07	0.00023
chr17.trna42-LeuTAG@1.22.22_2_9	SLC19A1|6573	0.531	5.6e-07	0.00023
chr1.trna111-HisGTG@-1T.29.30_1_9	PDE6D|5147	0.531	5.6e-07	0.00024
chr16.trna11-ProAGG@1.30.30_3_18|Out	LTB4R|1241	0.531	5.6e-07	0.00024
chr1.trna35-GlyGCC@1.27.27_1_5|Out	PSMB7|5695	0.531	5.6e-07	0.00024
chr13.trna3-GluTTC@1.28.28_1_2	ELOVL1|64834	0.531	5.7e-07	0.00024
chr17.trna4-ArgTCT@1.19.19_1_4|Out	PDE6D|5147	0.531	5.7e-07	0.00024
chr1.trna9-ArgTCT@1.19.19_1_1	TAF6|6878	0.531	5.7e-07	0.00024
chr17.trna16-GlnTTG@11.33.23_2_12|Out	YIF1A|10897	0.531	5.7e-07	0.00024
chr14.trna18-TyrGTA@1.23.23_1_8|Out	RINT1|60561	0.531	5.7e-07	0.00024
chr17.trna18-ArgCCT@35.54.20_1_5	SLC31A1|1317	0.531	5.7e-07	0.00024
chr14.trna18-TyrGTA@1.23.23_1_8|Out	PNPLA8|50640	0.531	5.8e-07	0.00024
chr1.trna9-ArgTCT@1.19.19_1_1	USMG5|84833	0.531	5.8e-07	0.00024
chr15.trna4-ArgTCG@1.19.19_2_4	PFDN2|5202	0.531	5.8e-07	0.00024
chr1.trna111-HisGTG@8.29.22_1_10|Out	CBX3|11335	0.531	5.8e-07	0.00024
chr17.trna42-LeuTAG@1.20.20_2_9	FDPS|2224	0.531	5.8e-07	0.00024
chr1.trna35-GlyGCC@1.28.28_1_5	SCARB1|949	0.531	5.9e-07	0.00024
chr1.trna68-GlyGCC@3.29.27_2_10|Out	HSPD1|3329	0.53	5.9e-07	0.00024
chr6.trna10-AlaCGC@1.23.23_3_8	CHCHD2|51142	0.53	5.9e-07	0.00024
chr1.trna35-GlyGCC@1.29.29_1_5	RARS2|57038	0.53	5.9e-07	0.00024
chr1.trna35-GlyGCC@1.29.29_1_5	PCSK6|5046	0.53	5.9e-07	0.00024
chr1.trna32-MetCAT@34.56.23_1_8	UBE2T|29089	0.53	5.9e-07	0.00024
chr14.trna18-TyrGTA@1.23.23_1_8|Out	SNX13|23161	0.53	6e-07	0.00025
chr6.trna16-TyrGTA@32.54.23_1_12	CST2|1470	0.53	6e-07	0.00025
chr17.trna4-ArgTCT@1.19.19_1_4|Out	TXNDC17|84817	0.53	6e-07	0.00025
chr1.trna68-GlyGCC@1.30.30_2_10|Out	RHOB|388	0.53	6.1e-07	0.00025
chr15.trna7-GlnCTG@11.34.24_1_7|Out	MRPL4|51073	0.53	6.1e-07	0.00025
chr1.trna111-HisGTG@35.56.22_1_10	GRAMD1B|57476	0.53	6.1e-07	0.00025
chr17.trna42-LeuTAG@1.20.20_2_9	AAMP|14	0.53	6.1e-07	0.00025
chr1.trna32-MetCAT@34.56.23_1_8	NRD1|4898	0.53	6.1e-07	0.00025
chr6.trna130-GlnTTG@1.30.30_1_3	GLO1|2739	0.53	6.1e-07	0.00025
chr6.trna110-AlaTGC@1.19.19_5_13	PDE6D|5147	0.53	6.1e-07	0.00025
chr1.trna111-HisGTG@11.34.24_1_9	MXD3|83463	0.53	6.1e-07	0.00025
chr1.trna111-HisGTG@9.31.23_1_10	FDPS|2224	0.53	6.1e-07	0.00025
chr1.trna35-GlyGCC@1.30.30_1_5	SLC16A1|6566	0.53	6.2e-07	0.00025
chr17.trna42-LeuTAG@1.22.22_2_9	CALM2|805	0.529	6.2e-07	0.00025
chr1.trna68-GlyGCC@1.29.29_2_10|Out	PDE6D|5147	0.529	6.2e-07	0.00025
chr1.trna68-GlyGCC@3.27.25_2_10|Out	TUBB2C|10383	0.529	6.2e-07	0.00025
chr1.trna111-HisGTG@16.31.16_1_10|Out	TMEM120B|144404	0.529	6.2e-07	0.00025
chr1.trna111-HisGTG@8.29.22_1_10|Out	LRP11|84918	0.529	6.2e-07	0.00025
chr16.trna34-GlyCCC@1.27.27_1_2	PNPT1|87178	0.529	6.3e-07	0.00025
chr1.trna9-ArgTCT@1.19.19_1_1	PABPN1|8106	0.529	6.3e-07	0.00025
chr1.trna35-GlyGCC@10.32.23_4_18|Out	ELOVL1|64834	0.529	6.4e-07	0.00026
chr17.trna16-GlnTTG@17.33.17_2_12|Out	CYP51A1|1595	0.529	6.4e-07	0.00026
chr1.trna111-HisGTG@3.30.28_1_9	CHCHD2|51142	0.529	6.4e-07	0.00026
chr6.trna110-AlaTGC@1.19.19_5_13	ACAT2|39	0.529	6.4e-07	0.00026
chr1.trna9-ArgTCT@1.19.19_1_1	KRTCAP2|200185	0.529	6.4e-07	0.00026
chr1.trna68-GlyGCC@3.29.27_2_10|Out	TBXA2R|6915	0.529	6.4e-07	0.00026
chr1.trna35-GlyGCC@1.29.29_1_5	RAPGEF1|2889	0.529	6.4e-07	0.00026
chr1.trna35-GlyGCC@1.29.29_1_5	MAPK8IP1|9479	0.529	6.4e-07	0.00026
chr17.trna16-GlnTTG@8.33.26_2_12|Out	HNRNPM|4670	0.529	6.4e-07	0.00026
chr1.trna35-GlyGCC@1.28.28_1_5	PSMB7|5695	0.529	6.5e-07	0.00026
chr1.trna35-GlyGCC@1.23.23_1_5|Out	SNX6|58533	0.529	6.5e-07	0.00026
chr6.trna10-AlaCGC@1.19.19_3_8	IDH1|3417	0.529	6.5e-07	0.00026
chr1.trna68-GlyGCC@3.27.25_2_10|Out	CCDC107|203260	0.529	6.5e-07	0.00026
chr1.trna111-HisGTG@9.29.21_1_10|Out	CBX3|11335	0.529	6.5e-07	0.00026
chr17.trna42-LeuTAG@68.85CCA.18_2_11	UBQLN1|29979	0.529	6.5e-07	0.00026
chr6.trna110-AlaTGC@59.75CCA.17_2_5	LRP11|84918	0.529	6.6e-07	0.00026
chr1.trna111-HisGTG@8.30.23_1_10|Out	ELOVL1|64834	0.528	6.6e-07	0.00026
chr6.trna10-AlaCGC@1.23.23_3_8	GREB1|9687	0.528	6.6e-07	0.00026
chr6.trna10-AlaCGC@1.24.24_3_8	KIAA1715|80856	0.528	6.6e-07	0.00026
chr6.trna108-AlaAGC@58.75CCA.18_1_1	TMEM209|84928	0.528	6.6e-07	0.00026
chr1.trna35-GlyGCC@1.29.29_1_5	EPRS|2058	0.528	6.6e-07	0.00026
chr1.trna68-GlyGCC@1.29.29_2_10|Out	HMGCR|3156	0.528	6.7e-07	0.00026
chr15.trna7-GlnCTG@21.44.24_1_12|Out	DDX51|317781	0.528	6.7e-07	0.00026
chr17.trna42-LeuTAG@1.22.22_2_9	GNAI3|2773	0.528	6.7e-07	0.00026
chr1.trna111-HisGTG@9.31.23_1_10	ACLY|47	0.528	6.7e-07	0.00027
chr6.trna10-AlaCGC@1.19.19_3_8	E2F6|1876	0.528	6.7e-07	0.00027
chr1.trna47-AsnGTT@36.58.23_1_10	ASB8|140461	0.528	6.7e-07	0.00027
chr16.trna11-ProAGG@1.30.30_3_18|Out	CHEK2|11200	0.528	6.7e-07	0.00027
chr15.trna7-GlnCTG@8.34.27_1_7|Out	ZDHHC18|84243	0.528	6.7e-07	0.00027
chr1.trna111-HisGTG@9.29.21_1_10|Out	ACAT2|39	0.528	6.8e-07	0.00027
chr1.trna111-HisGTG@9.31.23_1_10	POLR2D|5433	0.528	6.8e-07	0.00027
chr1.trna116-GluCTC@1.29.29_1_8|Out	PDE6D|5147	0.528	6.8e-07	0.00027
chr1.trna68-GlyGCC@1.29.29_2_10|Out	SCARB1|949	0.528	6.8e-07	0.00027
chr17.trna16-GlnTTG@8.30.23_2_13|Out	CHEK2|11200	0.528	6.8e-07	0.00027
chr1.trna111-HisGTG@8.30.23_1_10|Out	GNAI3|2773	0.528	6.9e-07	0.00027
chr6.trna10-AlaCGC@1.22.22_3_8	CSNK1G2|1455	0.528	6.9e-07	0.00027
chr1.trna111-HisGTG@9.31.23_1_10	SNX10|29887	0.528	6.9e-07	0.00027
chr1.trna35-GlyGCC@1.28.28_1_5	CYP51A1|1595	0.528	6.9e-07	0.00027
chr17.trna18-ArgCCT@35.54.20_1_5	KIAA0100|9703	0.528	6.9e-07	0.00027
chr1.trna111-HisGTG@-1T.22.23_1_9	SUSD2|56241	0.528	6.9e-07	0.00027
chr13.trna3-GluTTC@1.22.22_1_2	RCN2|5955	0.528	6.9e-07	0.00027
chr16.trna11-ProAGG@1.30.30_3_18|Out	TYRO3|7301	0.528	6.9e-07	0.00027
chr6.trna108-AlaAGC@58.75CCA.18_1_1	NCBP1|4686	0.528	6.9e-07	0.00027
chr1.trna116-GluCTC@51.75CCA.25_3_11	LTB4R|1241	0.528	6.9e-07	0.00027
chr6.trna10-AlaCGC@1.19.19_3_8	PECI|10455	0.527	7e-07	0.00027
chr17.trna23-ArgCCG@1.19.19_1_1|Out	KRTCAP2|200185	0.527	7e-07	0.00027
chr1.trna111-HisGTG@5.30.26_1_10|Out	TYRO3|7301	0.527	7e-07	0.00027
chr17.trna18-ArgCCT@1.19.19_1_3	LOC388955|388955	0.527	7e-07	0.00027
chr17.trna42-LeuTAG@1.20.20_2_9	RHOB|388	0.527	7.1e-07	0.00027
chr15.trna7-GlnCTG@11.34.24_1_7|Out	SLC26A6|65010	0.527	7.1e-07	0.00027
chr1.trna35-GlyGCC@3.30.28_1_5	HEATR3|55027	0.527	7.1e-07	0.00028
chr17.trna16-GlnTTG@17.33.17_2_12|Out	POR|5447	0.527	7.1e-07	0.00028
chr1.trna111-HisGTG@9.34.26_1_9	MRPL41|64975	0.527	7.1e-07	0.00028
chr6.trna10-AlaCGC@1.19.19_3_8	YIF1A|10897	0.527	7.1e-07	0.00028
chr17.trna19-ArgTCG@1.19.19_1_1	FBXL6|26233	0.527	7.1e-07	0.00028
chr6.trna110-AlaTGC@1.19.19_5_13	RAB4A|5867	0.527	7.1e-07	0.00028
chr1.trna35-GlyGCC@1.27.27_1_5|Out	TYRO3|7301	0.527	7.1e-07	0.00028
chr1.trna35-GlyGCC@3.30.28_1_5	MOBKL3|25843	0.527	7.1e-07	0.00028
chr1.trna34-LeuCAG@70.86CCA.17_1_7|Out	ISG20|3669	0.527	7.2e-07	0.00028
chr17.trna4-ArgTCT@1.19.19_1_4|Out	KRTCAP2|200185	0.527	7.2e-07	0.00028
chr1.trna111-HisGTG@4.28.25_1_9|Out	MED27|9442	0.527	7.2e-07	0.00028
chr15.trna7-GlnCTG@29.53.25_1_11	PHF5A|84844	0.527	7.3e-07	0.00028
chr17.trna42-LeuTAG@1.20.20_2_9	EXTL2|2135	0.527	7.3e-07	0.00028
chr1.trna111-HisGTG@8.34.27_1_9	LSM4|25804	0.527	7.3e-07	0.00028
chr6.trna110-AlaTGC@1.19.19_5_13	LRP11|84918	0.527	7.3e-07	0.00028
chr1.trna35-GlyGCC@19.39.21_1_12	AIMP2|7965	0.527	7.3e-07	0.00028
chr17.trna16-GlnTTG@17.33.17_2_12|Out	SLC31A1|1317	0.527	7.4e-07	0.00028
chr17.trna18-ArgCCT@1.19.19_1_3	TXNDC17|84817	0.526	7.4e-07	0.00028
chr6.trna10-AlaCGC@58.75CCA.18_2_7	MAPK8IP1|9479	0.526	7.4e-07	0.00028
chr6.trna10-AlaCGC@1.23.23_3_8	GLO1|2739	0.526	7.4e-07	0.00028
chr6.trna10-AlaCGC@1.19.19_3_8	HSD17B7|51478	0.526	7.4e-07	0.00028
chr1.trna68-GlyGCC@1.29.29_2_10|Out	NPTX1|4884	0.526	7.4e-07	0.00028
chr6.trna10-AlaCGC@1.23.23_3_8	CBX3|11335	0.526	7.4e-07	0.00028
chr1.trna111-HisGTG@9.29.21_1_10|Out	NOL10|79954	0.526	7.5e-07	0.00029
chr17.trna18-ArgCCT@1.19.19_1_3	DMAP1|55929	0.526	7.5e-07	0.00029
chr15.trna7-GlnCTG@11.34.24_1_7|Out	ATP6V0B|533	0.526	7.5e-07	0.00029
chr17.trna16-GlnTTG@15.33.19_2_12|Out	ACP1|52	0.526	7.5e-07	0.00029
chr2.trna2-TyrGTA@59.76CCA.18_1_7	DUSP5|1847	0.526	7.5e-07	0.00029
chr1.trna111-HisGTG@5.30.26_1_10|Out	POR|5447	0.526	7.6e-07	0.00029
chr1.trna35-GlyGCC@1.30.30_1_5	TIMM17A|10440	0.526	7.6e-07	0.00029
chr1.trna111-HisGTG@16.33.18_1_9	RTCD1|8634	0.526	7.6e-07	0.00029
chr1.trna111-HisGTG@35.56.22_1_10	MYT1|4661	0.526	7.6e-07	0.00029
chr1.trna35-GlyGCC@1.27.27_1_5|Out	ACP1|52	0.526	7.6e-07	0.00029
chr17.trna16-GlnTTG@11.33.23_2_12|Out	LRP11|84918	0.526	7.6e-07	0.00029
chr1.trna116-GluCTC@1.29.29_1_8|Out	GMNN|51053	0.526	7.6e-07	0.00029
chr1.trna35-GlyGCC@3.30.28_1_5	OGFOD1|55239	0.526	7.7e-07	0.00029
chr1.trna111-HisGTG@8.29.22_1_10|Out	LRWD1|222229	0.526	7.7e-07	0.00029
chr17.trna16-GlnTTG@7.33.27_2_12	CYP51A1|1595	0.526	7.7e-07	0.00029
chr1.trna111-HisGTG@8.29.22_1_10|Out	MRPL4|51073	0.526	7.7e-07	0.00029
chr17.trna23-ArgCCG@1.19.19_1_1|Out	ZNHIT1|10467	0.526	7.7e-07	0.00029
chr1.trna111-HisGTG@1.30.30_1_9	EPB41L1|2036	0.526	7.7e-07	0.00029
chr17.trna18-ArgCCT@1.19.19_1_3	PSMG3|84262	0.526	7.7e-07	0.00029
chr6.trna110-AlaTGC@1.19.19_5_13	FDX1|2230	0.526	7.8e-07	0.00029
chr19.trna2-GlyTCC@1.30.30_1_1|Out	ACP1|52	0.526	7.8e-07	0.00029
chr17.trna42-LeuTAG@1.20.20_2_9	SLC26A6|65010	0.526	7.8e-07	0.00029
chr16.trna11-ProAGG@1.30.30_3_18|Out	LOC90784|90784	0.526	7.8e-07	0.00029
chr1.trna86-ArgTCT@1.19.19_1_1	ARV1|64801	0.526	7.8e-07	0.00029
chr1.trna116-GluCTC@1.29.29_1_8|Out	LRP11|84918	0.526	7.8e-07	0.00029
chr17.trna16-GlnTTG@17.33.17_2_12|Out	CEBPZ|10153	0.525	7.8e-07	0.00029
chr1.trna35-GlyGCC@1.29.29_1_5	NR5A1|2516	0.525	7.9e-07	0.0003
chr7.trna5-CysGCA@10.33.24_1_7|Out	HSPD1|3329	0.525	7.9e-07	0.0003
chr1.trna35-GlyGCC@1.30.30_1_5	LSM4|25804	0.525	7.9e-07	0.0003
chr1.trna9-ArgTCT@1.19.19_1_1	MAGOH|4116	0.525	8e-07	0.0003
chr17.trna16-GlnTTG@1.30.30_1_3	BTN2A2|10385	0.525	8e-07	0.0003
chr1.trna111-HisGTG@9.32.24_1_9	PNPT1|87178	0.525	8e-07	0.0003
chr19.trna2-GlyTCC@1.30.30_1_1|Out	ELOVL1|64834	0.525	8e-07	0.0003
chr6.trna10-AlaCGC@1.22.22_3_8	MOBKL3|25843	0.525	8e-07	0.0003
chr1.trna111-HisGTG@8.30.23_1_10|Out	QSOX2|169714	0.525	8e-07	0.0003
chr1.trna35-GlyGCC@19.39.21_1_12	TRIM25|7706	0.525	8e-07	0.0003
chr14.trna18-TyrGTA@1.25.25_1_8|Out	RDH11|51109	0.525	8.1e-07	0.0003
chr1.trna35-GlyGCC@1.29.29_1_5	E2F6|1876	0.525	8.1e-07	0.0003
chr13.trna3-GluTTC@1.23.23_1_2	ARPP19|10776	0.525	8.1e-07	0.0003
chr17.trna16-GlnTTG@11.33.23_2_12|Out	MVD|4597	0.525	8.1e-07	0.0003
chr7.trna5-CysGCA@10.33.24_1_7|Out	IDH1|3417	0.525	8.1e-07	0.0003
chr1.trna111-HisGTG@16.31.16_1_10|Out	SLC31A1|1317	0.525	8.1e-07	0.0003
chr7.trna5-CysGCA@10.33.24_1_7|Out	CHCHD2|51142	0.525	8.1e-07	0.0003
chr13.trna3-GluTTC@1.22.22_1_2	ZNF592|9640	0.525	8.1e-07	0.0003
chr1.trna111-HisGTG@8.29.22_1_10|Out	TMEM120B|144404	0.525	8.1e-07	0.0003
chr1.trna111-HisGTG@8.31.24_1_10	CEBPZ|10153	0.525	8.1e-07	0.0003
chr13.trna3-GluTTC@1.22.22_1_2	ZFAND6|54469	0.525	8.1e-07	0.0003
chr6.trna108-AlaAGC@58.75CCA.18_1_1	SOCS4|122809	0.525	8.1e-07	0.0003
chr1.trna111-HisGTG@8.31.24_1_10	YIF1A|10897	0.525	8.1e-07	0.0003
chr1.trna111-HisGTG@8.29.22_1_10|Out	DPH2|1802	0.525	8.2e-07	0.0003
chr6.trna10-AlaCGC@1.23.23_3_8	FDX1|2230	0.525	8.2e-07	0.0003
chr17.trna42-LeuTAG@1.22.22_2_9	ACP1|52	0.525	8.2e-07	0.0003
chr1.trna111-HisGTG@1.30.30_1_9	CYP51A1|1595	0.525	8.2e-07	0.0003
chr1.trna68-GlyGCC@1.29.29_2_10|Out	SF3B14|51639	0.525	8.2e-07	0.0003
chr1.trna111-HisGTG@8.31.24_1_10	KPNA2|3838	0.525	8.2e-07	0.0003
chr6.trna10-AlaCGC@1.24.24_3_8	ELOVL1|64834	0.525	8.2e-07	0.0003
chr14.trna18-TyrGTA@1.23.23_1_8|Out	ZNF562|54811	0.525	8.3e-07	0.00031
chr3.trna7-CysGCA@1.29.29_1_1	C7orf30|115416	0.524	8.3e-07	0.00031
chr1.trna111-HisGTG@8.30.23_1_10|Out	RTCD1|8634	0.524	8.3e-07	0.00031
chr19.trna10-IleTAT@1.20.20_1_5|Out	MRPL4|51073	0.524	8.3e-07	0.00031
chr1.trna111-HisGTG@8.30.23_1_10|Out	AAGAB|79719	0.524	8.3e-07	0.00031
chr1.trna116-GluCTC@1.29.29_1_8|Out	CCT6A|908	0.524	8.3e-07	0.00031
chr17.trna4-ArgTCT@1.19.19_1_4|Out	PSMG3|84262	0.524	8.4e-07	0.00031
chr1.trna111-HisGTG@8.29.22_1_10|Out	HSPD1|3329	0.524	8.4e-07	0.00031
chr13.trna3-GluTTC@1.30.30_1_2	LRP11|84918	0.524	8.4e-07	0.00031
chr1.trna116-GluCTC@1.28.28_1_8|Out	GMNN|51053	0.524	8.4e-07	0.00031
chr1.trna111-HisGTG@9.31.23_1_10	REN|5972	0.524	8.4e-07	0.00031
chr1.trna111-HisGTG@8.29.22_1_10|Out	E2F6|1876	0.524	8.4e-07	0.00031
chr15.trna7-GlnCTG@11.34.24_1_7|Out	NIPA2|81614	0.524	8.4e-07	0.00031
chr1.trna34-LeuCAG@70.86CCA.17_1_7|Out	CEBPZ|10153	0.524	8.4e-07	0.00031
chr1.trna116-GluCTC@51.75CCA.25_3_11	CHEK2|11200	0.524	8.4e-07	0.00031
chr7.trna5-CysGCA@10.33.24_1_7|Out	ZNF92|168374	0.524	8.4e-07	0.00031
chr16.trna11-ProAGG@1.30.30_3_18|Out	LRP11|84918	0.524	8.4e-07	0.00031
chr1.trna111-HisGTG@3.30.28_1_9	CYP51A1|1595	0.524	8.4e-07	0.00031
chr17.trna18-ArgCCT@1.19.19_1_3	PFDN2|5202	0.524	8.4e-07	0.00031
chr1.trna9-ArgTCT@1.19.19_1_1	RHBDD2|57414	0.524	8.4e-07	0.00031
chr14.trna18-TyrGTA@1.23.23_1_8|Out	C10orf18|54906	0.524	8.4e-07	0.00031
chr1.trna111-HisGTG@9.31.23_1_10	E2F6|1876	0.524	8.5e-07	0.00031
chr1.trna35-GlyGCC@1.30.30_1_5	LDLR|3949	0.524	8.5e-07	0.00031
chr13.trna3-GluTTC@1.23.23_1_2	SELS|55829	0.524	8.5e-07	0.00031
chr1.trna111-HisGTG@5.30.26_1_10|Out	MSH6|2956	0.524	8.5e-07	0.00031
chr14.trna18-TyrGTA@1.25.25_1_8|Out	CYCS|54205	0.524	8.6e-07	0.00031
chr13.trna3-GluTTC@1.22.22_1_2	ARPP19|10776	0.524	8.6e-07	0.00031
chr1.trna35-GlyGCC@1.28.28_1_5	CD83|9308	0.524	8.6e-07	0.00031
chr13.trna5-GluTTC@1.23.23_1_2	EML3|256364	0.524	8.6e-07	0.00031
chr15.trna7-GlnCTG@11.34.24_1_7|Out	DCUN1D5|84259	0.524	8.7e-07	0.00032
chr17.trna42-LeuTAG@1.20.20_2_9	CBX3|11335	0.524	8.7e-07	0.00032
chr1.trna111-HisGTG@9.29.21_1_10|Out	NAA25|80018	0.524	8.7e-07	0.00032
chr5.trna15-ValAAC@1.20.20_1_1	TP53TG1|11257	0.523	8.8e-07	0.00032
chr1.trna32-MetCAT@34.56.23_1_8	SNRPA1|6627	0.523	8.8e-07	0.00032
chr1.trna68-GlyGCC@3.30.28_2_10|Out	ACP1|52	0.523	8.8e-07	0.00032
chr17.trna23-ArgCCG@1.19.19_1_1|Out	PFDN6|10471	0.523	8.8e-07	0.00032
chr17.trna19-ArgTCG@1.19.19_1_1	MAGOH|4116	0.523	8.8e-07	0.00032
chr6.trna110-AlaTGC@1.19.19_5_13	FDFT1|2222	0.523	8.8e-07	0.00032
chr1.trna111-HisGTG@8.31.24_1_10	WNT5A|7474	0.523	8.8e-07	0.00032
chr1.trna111-HisGTG@15.34.20_1_9	NDUFA7|4701	0.523	8.8e-07	0.00032
chr6.trna110-AlaTGC@59.75CCA.17_2_5	TOR1B|27348	0.523	8.8e-07	0.00032
chr2.trna2-TyrGTA@59.76CCA.18_1_7	NDEL1|81565	0.523	8.8e-07	0.00032
chr1.trna111-HisGTG@15.34.20_1_9	PDE6D|5147	0.523	8.9e-07	0.00032
chr17.trna42-LeuTAG@1.20.20_2_9	PTPRF|5792	0.523	8.9e-07	0.00032
chr15.trna7-GlnCTG@11.34.24_1_7|Out	GNAI3|2773	0.523	8.9e-07	0.00032
chr15.trna7-GlnCTG@11.34.24_1_7|Out	E2F6|1876	0.523	8.9e-07	0.00032
chr1.trna68-GlyGCC@3.29.27_2_10|Out	PNPT1|87178	0.523	8.9e-07	0.00032
chr1.trna35-GlyGCC@19.39.21_1_12	LRP11|84918	0.523	8.9e-07	0.00032
chr6.trna10-AlaCGC@1.22.22_3_8	UBE2M|9040	0.523	8.9e-07	0.00032
chr1.trna111-HisGTG@8.30.23_1_10|Out	COBRA1|25920	0.523	9e-07	0.00032
chr17.trna4-ArgTCT@1.19.19_1_4|Out	POLR2J|5439	0.523	9e-07	0.00032
chr1.trna68-GlyGCC@1.30.30_2_10|Out	SRP9|6726	0.523	9e-07	0.00032
chr1.trna111-HisGTG@-1T.29.30_1_9	ATG4D|84971	0.523	9e-07	0.00032
chr1.trna35-GlyGCC@1.30.30_1_5	CBX3|11335	0.523	9.1e-07	0.00033
chr1.trna47-AsnGTT@1.20.20_2_19	SRP9|6726	0.523	9.1e-07	0.00033
chr17.trna4-ArgTCT@1.19.19_1_4|Out	LSM4|25804	0.523	9.1e-07	0.00033
chr15.trna7-GlnCTG@3.32.30_1_7	NDUFB4|4710	0.523	9.1e-07	0.00033
chr1.trna68-GlyGCC@1.29.29_2_10|Out	STRAP|11171	0.523	9.1e-07	0.00033
chr6.trna10-AlaCGC@1.19.19_3_8	EPT1|85465	0.523	9.1e-07	0.00033
chr1.trna111-HisGTG@-1T.23.24_1_9	CFH|3075	0.523	9.2e-07	0.00033
chr17.trna16-GlnTTG@11.33.23_2_12|Out	LDLR|3949	0.523	9.2e-07	0.00033
chr1.trna116-GluCTC@1.28.28_1_8|Out	EIF4E2|9470	0.523	9.2e-07	0.00033
chr13.trna3-GluTTC@1.30.30_1_2	ACP1|52	0.523	9.2e-07	0.00033
chr1.trna116-GluCTC@1.29.29_1_8|Out	IDI1|3422	0.522	9.3e-07	0.00033
chr1.trna68-GlyGCC@3.27.25_2_10|Out	TXNDC17|84817	0.522	9.3e-07	0.00033
chr6.trna110-AlaTGC@1.24.24_5_13	ELOVL1|64834	0.522	9.3e-07	0.00033
chr16.trna11-ProAGG@1.30.30_3_18|Out	EPT1|85465	0.522	9.3e-07	0.00033
chr15.trna7-GlnCTG@21.42.22_1_12|Out	CCDC64|92558	0.522	9.3e-07	0.00033
chr17.trna18-ArgCCT@35.54.20_1_5	CST2|1470	0.522	9.3e-07	0.00033
chr1.trna111-HisGTG@9.29.21_1_10|Out	TMEM120B|144404	0.522	9.4e-07	0.00033
chr1.trna117-GlyTCC@1.30.30_1_6|Out	ACP1|52	0.522	9.4e-07	0.00033
chr1.trna111-HisGTG@9.29.21_1_10|Out	LRP11|84918	0.522	9.4e-07	0.00033
chr1.trna111-HisGTG@4.29.26_1_9|Out	TMEM120B|144404	0.522	9.4e-07	0.00033
chr2.trna2-TyrGTA@59.76CCA.18_1_7	CEBPZ|10153	0.522	9.4e-07	0.00033
chr1.trna111-HisGTG@16.33.18_1_9	ISG20L2|81875	0.522	9.4e-07	0.00033
chr17.trna16-GlnTTG@1.29.29_1_3	MAPKAP1|79109	0.522	9.4e-07	0.00033
chr1.trna69-AspGTC@51.75CCA.25_1_12	WDR46|9277	0.522	9.4e-07	0.00033
chr1.trna111-HisGTG@9.34.26_1_9	ALKBH6|84964	0.522	9.4e-07	0.00033
chr15.trna7-GlnCTG@15.34.20_1_7|Out	SLC26A6|65010	0.522	9.4e-07	0.00033
chr6.trna110-AlaTGC@1.19.19_5_13	POR|5447	0.522	9.4e-07	0.00033
chr1.trna35-GlyGCC@1.29.29_1_5	SLC16A1|6566	0.522	9.5e-07	0.00033
chr1.trna111-HisGTG@5.30.26_1_10|Out	ARL4A|10124	0.522	9.5e-07	0.00033
chr13.trna5-GluTTC@1.22.22_1_2	PHF5A|84844	0.522	9.5e-07	0.00033
chr6.trna10-AlaCGC@1.19.19_3_8	IDI1|3422	0.522	9.5e-07	0.00033
chr1.trna35-GlyGCC@1.28.28_1_5	HSPD1|3329	0.522	9.5e-07	0.00033
chr1.trna68-GlyGCC@1.29.29_2_10|Out	PSMB5|5693	0.522	9.5e-07	0.00033
chr1.trna35-GlyGCC@1.28.28_1_5	TIMM17A|10440	0.522	9.5e-07	0.00034
chr17.trna18-ArgCCT@35.54.20_1_5	GLRX|2745	0.522	9.5e-07	0.00034
chr15.trna7-GlnCTG@12.34.23_1_7|Out	ELOVL1|64834	0.522	9.5e-07	0.00034
chr1.trna111-HisGTG@16.33.18_1_9	GGCT|79017	0.522	9.5e-07	0.00034
chr1.trna35-GlyGCC@1.29.29_1_5	NDEL1|81565	0.522	9.5e-07	0.00034
chr1.trna35-GlyGCC@1.22.22_1_5|Out	ALDH1B1|219	0.522	9.5e-07	0.00034
chr1.trna35-GlyGCC@1.30.30_1_5	SRP9|6726	0.522	9.6e-07	0.00034
chr1.trna111-HisGTG@8.30.23_1_10|Out	YIF1A|10897	0.522	9.6e-07	0.00034
chr15.trna7-GlnCTG@11.34.24_1_7|Out	CD83|9308	0.522	9.6e-07	0.00034
chr1.trna68-GlyGCC@1.29.29_2_10|Out	CHCHD2|51142	0.522	9.6e-07	0.00034
chr17.trna42-LeuTAG@1.20.20_2_9	CYP51A1|1595	0.522	9.6e-07	0.00034
chr1.trna68-GlyGCC@1.29.29_2_10|Out	SELS|55829	0.522	9.6e-07	0.00034
chr1.trna68-GlyGCC@3.29.27_2_10|Out	POR|5447	0.522	9.6e-07	0.00034
chr16.trna11-ProAGG@1.30.30_3_18|Out	LSM4|25804	0.522	9.6e-07	0.00034
chr1.trna35-GlyGCC@1.28.28_1_5	ALDH1B1|219	0.522	9.7e-07	0.00034
chr17.trna42-LeuTAG@1.22.22_2_9	EIF3B|8662	0.522	9.7e-07	0.00034
chr1.trna68-GlyGCC@3.28.26_2_10|Out	MTRF1L|54516	0.522	9.7e-07	0.00034
chr2.trna2-TyrGTA@59.76CCA.18_1_7	TTLL12|23170	0.522	9.7e-07	0.00034
chr1.trna68-GlyGCC@3.27.25_2_10|Out	ZMYND19|116225	0.522	9.8e-07	0.00034
chr14.trna18-TyrGTA@1.23.23_1_8|Out	DAAM1|23002	0.521	9.8e-07	0.00034
chr1.trna35-GlyGCC@1.22.22_1_5|Out	PPIL5|122769	0.521	9.8e-07	0.00034
chr6.trna110-AlaTGC@1.19.19_5_13	EBP|10682	0.521	9.8e-07	0.00034
chr6.trna10-AlaCGC@1.23.23_3_8	MVK|4598	0.521	9.8e-07	0.00034
chr15.trna7-GlnCTG@15.34.20_1_7|Out	REN|5972	0.521	9.8e-07	0.00034
chr1.trna111-HisGTG@8.31.24_1_10	EXTL2|2135	0.521	9.8e-07	0.00034
chr17.trna16-GlnTTG@17.33.17_2_12|Out	ACP1|52	0.521	9.9e-07	0.00034
chr17.trna16-GlnTTG@16.31.16_2_12|Out	SLC31A1|1317	0.521	9.9e-07	0.00034
chr6.trna10-AlaCGC@1.19.19_3_8	MRPL4|51073	0.521	9.9e-07	0.00034
chr1.trna111-HisGTG@-1T.29.30_1_9	MXD3|83463	0.521	9.9e-07	0.00034
chr6.trna110-AlaTGC@1.19.19_5_13	REN|5972	0.521	9.9e-07	0.00034
chr2.trna2-TyrGTA@59.76CCA.18_1_7	PDXP|57026	0.521	9.9e-07	0.00035
chr1.trna35-GlyGCC@1.27.27_1_5|Out	GREB1|9687	0.521	9.9e-07	0.00035
chr1.trna69-AspGTC@51.75CCA.25_1_12	BYSL|705	0.521	1e-06	0.00035
chr1.trna111-HisGTG@16.35.20_1_9	POR|5447	0.521	1e-06	0.00035
chr17.trna4-ArgTCT@1.19.19_1_4|Out	MPV17L2|84769	0.521	1e-06	0.00035
chr17.trna4-ArgTCT@1.19.19_1_4|Out	MIF|4282	0.521	1e-06	0.00035
chr17.trna4-ArgTCT@1.19.19_1_4|Out	NOP16|51491	0.521	1e-06	0.00035
chr1.trna68-GlyGCC@3.29.27_2_10|Out	SF3B14|51639	0.521	1e-06	0.00035
chr1.trna86-ArgTCT@1.19.19_1_1	RHBDD2|57414	0.521	1e-06	0.00035
chr6.trna108-AlaAGC@58.75CCA.18_1_1	CLPTM1L|81037	0.521	1e-06	0.00035
chr14.trna8-CysGCA@1.29.29_1_10	GK|2710	0.521	1e-06	0.00035
chr1.trna35-GlyGCC@1.30.30_1_5	HSPD1|3329	0.521	1e-06	0.00035
chr16.trna34-GlyCCC@1.27.27_1_2	C7orf28A|51622	0.521	1e-06	0.00035
chr1.trna111-HisGTG@16.33.18_1_9	QSOX2|169714	0.521	1e-06	0.00035
chr1.trna117-GlyTCC@1.23.23_1_7|Out	RPS12|6206	0.521	1e-06	0.00035
chr14.trna13-LysCTT@1.30.30_1_3	SLC26A6|65010	0.521	1e-06	0.00035
chr6.trna10-AlaCGC@1.22.22_3_8	TIMM17A|10440	0.521	1e-06	0.00035
chr13.trna3-GluTTC@1.22.22_1_2	SELS|55829	0.521	1e-06	0.00035
chr1.trna111-HisGTG@8.29.22_1_10|Out	PLD5|200150	0.521	1e-06	0.00035
chr1.trna111-HisGTG@8.34.27_1_9	PDE6D|5147	0.521	1e-06	0.00035
chr14.trna13-LysCTT@1.30.30_1_3	GLO1|2739	0.521	1e-06	0.00035
chr1.trna99-ValCAC@1.30.30_2_2	FDPS|2224	0.521	1e-06	0.00035
chr1.trna68-GlyGCC@1.29.29_2_10|Out	CHEK2|11200	0.521	1e-06	0.00035
chr1.trna111-HisGTG@3.30.28_1_9	C7orf28A|51622	0.521	1e-06	0.00035
chr1.trna111-HisGTG@9.29.21_1_10|Out	FSCN1|6624	0.521	1e-06	0.00035
chr17.trna16-GlnTTG@11.33.23_2_12|Out	NCLN|56926	0.521	1e-06	0.00035
chr1.trna111-HisGTG@8.29.22_1_10|Out	NIPA2|81614	0.52	1e-06	0.00036
chr1.trna35-GlyGCC@1.28.28_1_5	PIN1|5300	0.52	1e-06	0.00036
chr1.trna35-GlyGCC@1.29.29_1_5	PPP2R3C|55012	0.52	1e-06	0.00036
chr1.trna35-GlyGCC@1.29.29_1_5	AAGAB|79719	0.52	1e-06	0.00036
chr15.trna4-ArgTCG@1.19.19_2_4	SHFM1|7979	0.52	1e-06	0.00036
chr15.trna4-ArgTCG@1.19.19_2_4	PSENEN|55851	0.52	1e-06	0.00036
chr1.trna111-HisGTG@8.34.27_1_9	FAM125A|93343	0.52	1.1e-06	0.00036
chr1.trna68-GlyGCC@1.29.29_2_10|Out	PSMD14|10213	0.52	1.1e-06	0.00036
chr1.trna111-HisGTG@16.33.18_1_9	PURB|5814	0.52	1.1e-06	0.00036
chr1.trna116-GluCTC@1.29.29_1_8|Out	PIN1|5300	0.52	1.1e-06	0.00036
chr1.trna111-HisGTG@8.31.24_1_10	EIF2S1|1965	0.52	1.1e-06	0.00036
chr1.trna111-HisGTG@8.29.22_1_10|Out	QSOX2|169714	0.52	1.1e-06	0.00036
chr14.trna7-ArgACG@1.19.19_1_7|Out	SHFM1|7979	0.52	1.1e-06	0.00036
chr17.trna42-LeuTAG@1.20.20_2_9	MOBKL3|25843	0.52	1.1e-06	0.00036
chr19.trna10-IleTAT@1.19.19_1_5|Out	RTCD1|8634	0.52	1.1e-06	0.00036
chr1.trna111-HisGTG@15.34.20_1_9	FAM125A|93343	0.52	1.1e-06	0.00036
chr2.trna2-TyrGTA@59.76CCA.18_1_7	CDK5RAP2|55755	0.52	1.1e-06	0.00036
chr17.trna16-GlnTTG@11.33.23_2_12|Out	ARL4A|10124	0.52	1.1e-06	0.00036
chr17.trna16-GlnTTG@1.30.30_1_3	SLC31A1|1317	0.52	1.1e-06	0.00036
chr14.trna18-TyrGTA@1.23.23_1_8|Out	PVR|5817	0.52	1.1e-06	0.00036
chr1.trna35-GlyGCC@1.22.22_1_5|Out	NCBP1|4686	0.52	1.1e-06	0.00036
chr17.trna18-ArgCCT@1.19.19_1_3	ABHD14A|25864	0.52	1.1e-06	0.00036
chr2.trna2-TyrGTA@59.76CCA.18_1_7	CHEK2|11200	0.52	1.1e-06	0.00036
chr1.trna111-HisGTG@8.29.22_1_10|Out	LSM4|25804	0.52	1.1e-06	0.00036
chr1.trna35-GlyGCC@12.32.21_4_18|Out	LDLR|3949	0.52	1.1e-06	0.00036
chr1.trna35-GlyGCC@1.29.29_1_5	CNIH|10175	0.52	1.1e-06	0.00036
chr17.trna16-GlnTTG@17.33.17_2_12|Out	SRP9|6726	0.52	1.1e-06	0.00036
chr2.trna2-TyrGTA@59.76CCA.18_1_7	SLC25A17|10478	0.52	1.1e-06	0.00036
chr6.trna10-AlaCGC@1.23.23_3_8	POLD2|5425	0.52	1.1e-06	0.00036
chr1.trna68-GlyGCC@3.29.27_2_10|Out	SLC5A6|8884	0.52	1.1e-06	0.00036
chr6.trna110-AlaTGC@59.75CCA.17_2_5	PTPDC1|138639	0.52	1.1e-06	0.00036
chr1.trna111-HisGTG@9.31.23_1_10	SCARB1|949	0.52	1.1e-06	0.00036
chr1.trna111-HisGTG@16.34.19_1_9	RHBDD2|57414	0.52	1.1e-06	0.00037
chr1.trna111-HisGTG@8.31.24_1_10	CD83|9308	0.52	1.1e-06	0.00037
chr1.trna111-HisGTG@8.31.24_1_10	RAN|5901	0.52	1.1e-06	0.00037
chr1.trna111-HisGTG@16.34.19_1_9	CKS2|1164	0.52	1.1e-06	0.00037
chr14.trna18-TyrGTA@1.23.23_1_8|Out	PPM1A|5494	0.52	1.1e-06	0.00037
chr15.trna7-GlnCTG@12.34.23_1_7|Out	YIPF4|84272	0.52	1.1e-06	0.00037
chr1.trna68-GlyGCC@1.29.29_2_10|Out	ZNF92|168374	0.52	1.1e-06	0.00037
chr13.trna5-GluTTC@1.23.23_1_2	TRABD|80305	0.52	1.1e-06	0.00037
chr17.trna42-LeuTAG@1.20.20_2_9	TYRO3|7301	0.519	1.1e-06	0.00037
chr17.trna16-GlnTTG@12.33.22_2_12|Out	CYP51A1|1595	0.519	1.1e-06	0.00037
chr1.trna68-GlyGCC@1.29.29_2_10|Out	FAM136A|84908	0.519	1.1e-06	0.00037
chr1.trna111-HisGTG@-1T.22.23_1_9	AEBP1|165	0.519	1.1e-06	0.00037
chr1.trna116-GluCTC@52.75CCA.24_3_13	SLC25A17|10478	0.519	1.1e-06	0.00037
chr1.trna111-HisGTG@13.34.22_1_9	ALKBH6|84964	0.519	1.1e-06	0.00037
chr6.trna110-AlaTGC@1.19.19_5_13	TMEM9|252839	0.519	1.1e-06	0.00037
chr1.trna111-HisGTG@5.34.30_1_9	LSM4|25804	0.519	1.1e-06	0.00037
chr15.trna7-GlnCTG@11.34.24_1_7|Out	PTPRF|5792	0.519	1.1e-06	0.00037
chr17.trna16-GlnTTG@17.33.17_2_12|Out	TIMM17A|10440	0.519	1.1e-06	0.00037
chr17.trna18-ArgCCT@35.54.20_1_5	ALDH1B1|219	0.519	1.1e-06	0.00037
chr1.trna35-GlyGCC@1.28.28_1_5	QSOX2|169714	0.519	1.1e-06	0.00037
chr6.trna110-AlaTGC@58.75CCA.18_2_5	CDKN2B|1030	0.519	1.1e-06	0.00037
chr1.trna35-GlyGCC@1.29.29_1_5	SLC5A6|8884	0.519	1.1e-06	0.00037
chr1.trna35-GlyGCC@1.29.29_1_5	MVD|4597	0.519	1.1e-06	0.00037
chr1.trna116-GluCTC@1.29.29_1_8|Out	POR|5447	0.519	1.1e-06	0.00037
chr1.trna116-GluCTC@1.29.29_1_8|Out	LDLR|3949	0.519	1.1e-06	0.00037
chr1.trna68-GlyGCC@1.27.27_2_10|Out	TOMM5|401505	0.519	1.1e-06	0.00037
chr6.trna10-AlaCGC@1.23.23_3_8	MED8|112950	0.519	1.1e-06	0.00037
chr14.trna18-TyrGTA@1.25.25_1_8|Out	MSI2|124540	0.519	1.1e-06	0.00037
chr1.trna47-AsnGTT@1.20.20_2_19	CD83|9308	0.519	1.1e-06	0.00038
chr15.trna4-ArgTCG@1.19.19_2_4	NDUFA7|4701	0.519	1.1e-06	0.00038
chr17.trna19-ArgTCG@1.19.19_1_1	PSMG3|84262	0.519	1.1e-06	0.00038
chr6.trna110-AlaTGC@1.24.24_5_13	TIMM17A|10440	0.519	1.1e-06	0.00038
chr14.trna18-TyrGTA@1.23.23_1_8|Out	RBM27|54439	0.519	1.1e-06	0.00038
chr17.trna42-LeuTAG@1.20.20_2_9	SLC19A1|6573	0.519	1.1e-06	0.00038
chr1.trna35-GlyGCC@1.29.29_1_5	NIPA2|81614	0.519	1.1e-06	0.00038
chr17.trna16-GlnTTG@15.33.19_2_12|Out	SRP9|6726	0.519	1.1e-06	0.00038
chr17.trna18-ArgCCT@35.54.20_1_5	PHF5A|84844	0.519	1.1e-06	0.00038
chr1.trna68-GlyGCC@1.29.29_2_10|Out	SMAD2|4087	0.519	1.1e-06	0.00038
chr1.trna35-GlyGCC@3.30.28_1_5	SCARB1|949	0.519	1.1e-06	0.00038
chr1.trna35-GlyGCC@1.23.23_1_5|Out	SLC25A17|10478	0.519	1.1e-06	0.00038
chr1.trna68-GlyGCC@3.29.27_2_10|Out	ZC3H15|55854	0.519	1.1e-06	0.00038
chr1.trna111-HisGTG@8.30.23_1_10|Out	PNPT1|87178	0.519	1.1e-06	0.00038
chr6.trna10-AlaCGC@58.75CCA.18_2_7	MOCOS|55034	0.519	1.1e-06	0.00038
chr1.trna68-GlyGCC@1.28.28_2_10|Out	MTRF1L|54516	0.519	1.1e-06	0.00038
chr1.trna111-HisGTG@8.30.23_1_10|Out	C9orf30|91283	0.519	1.2e-06	0.00038
chr1.trna68-GlyGCC@1.29.29_2_10|Out	ACAT2|39	0.519	1.2e-06	0.00038
chr15.trna7-GlnCTG@11.34.24_1_7|Out	TMEM120B|144404	0.519	1.2e-06	0.00038
chr6.trna110-AlaTGC@59.75CCA.17_2_5	UBQLN1|29979	0.519	1.2e-06	0.00038
chr1.trna116-GluCTC@1.29.29_1_8|Out	MRPL4|51073	0.519	1.2e-06	0.00038
chr13.trna5-GluTTC@1.30.30_1_2	TIMM17A|10440	0.519	1.2e-06	0.00038
chr17.trna16-GlnTTG@11.33.23_2_12|Out	CALM2|805	0.519	1.2e-06	0.00038
chr17.trna16-GlnTTG@11.33.23_2_12|Out	AAGAB|79719	0.519	1.2e-06	0.00038
chr1.trna68-GlyGCC@1.29.29_2_10|Out	COPS7B|64708	0.519	1.2e-06	0.00038
chr1.trna35-GlyGCC@1.29.29_1_5	ACAT2|39	0.519	1.2e-06	0.00038
chr1.trna111-HisGTG@4.29.26_1_9|Out	ATG4D|84971	0.518	1.2e-06	0.00038
chr1.trna99-ValCAC@1.30.30_2_2	CBX3|11335	0.518	1.2e-06	0.00038
chr1.trna116-GluCTC@1.26.26_1_8|Out	PPIL5|122769	0.518	1.2e-06	0.00038
chr1.trna111-HisGTG@9.29.21_1_10|Out	NR5A1|2516	0.518	1.2e-06	0.00038
chr16.trna11-ProAGG@1.25.25_3_19|Out	PURB|5814	0.518	1.2e-06	0.00038
chr1.trna35-GlyGCC@1.28.28_1_5	GMNN|51053	0.518	1.2e-06	0.00039
chr14.trna18-TyrGTA@1.23.23_1_8|Out	NOM1|64434	0.518	1.2e-06	0.00039
chr1.trna111-HisGTG@5.30.26_1_10|Out	CHEK2|11200	0.518	1.2e-06	0.00039
chr17.trna4-ArgTCT@1.19.19_1_4|Out	USMG5|84833	0.518	1.2e-06	0.00039
chr1.trna116-GluCTC@1.29.29_1_8|Out	RARS2|57038	0.518	1.2e-06	0.00039
chr1.trna111-HisGTG@8.31.24_1_10	SHMT2|6472	0.518	1.2e-06	0.00039
chr6.trna10-AlaCGC@1.19.19_3_8	LDLR|3949	0.518	1.2e-06	0.00039
chr1.trna35-GlyGCC@1.29.29_1_5	DDTL|100037417	0.518	1.2e-06	0.00039
chr1.trna111-HisGTG@9.31.23_1_10	EGLN1|54583	0.518	1.2e-06	0.00039
chr17.trna18-ArgCCT@35.54.20_1_5	ARL4A|10124	0.518	1.2e-06	0.00039
chr1.trna34-LeuCAG@65.86CCA.22_1_7	TMEM63B|55362	0.518	1.2e-06	0.00039
chr17.trna4-ArgTCT@1.19.19_1_4|Out	SEC61B|10952	0.518	1.2e-06	0.00039
chr14.trna18-TyrGTA@1.23.23_1_8|Out	C5orf44|80006	0.518	1.2e-06	0.00039
chr1.trna69-AspGTC@51.73C.23_1_12	TIPRL|261726	0.518	1.2e-06	0.00039
chr19.trna2-GlyTCC@28.53.26_1_8	ALDH1B1|219	0.518	1.2e-06	0.00039
chr14.trna18-TyrGTA@1.25.25_1_8|Out	SLC1A2|6506	0.518	1.2e-06	0.00039
chr1.trna68-GlyGCC@1.29.29_2_10|Out	GLO1|2739	0.518	1.2e-06	0.00039
chr15.trna7-GlnCTG@15.34.20_1_7|Out	RTCD1|8634	0.518	1.2e-06	0.00039
chr14.trna18-TyrGTA@1.25.25_1_8|Out	NPTX2|4885	0.518	1.2e-06	0.00039
chr1.trna117-GlyTCC@1.30.30_1_6|Out	PTS|5805	0.518	1.2e-06	0.00039
chr6.trna10-AlaCGC@1.23.23_3_8	PGRMC1|10857	0.518	1.2e-06	0.00039
chr1.trna35-GlyGCC@1.28.28_1_5	NPTX1|4884	0.518	1.2e-06	0.00039
chr17.trna16-GlnTTG@11.33.23_2_12|Out	SFXN1|94081	0.518	1.2e-06	0.00039
chr1.trna35-GlyGCC@1.28.28_1_5	TBXA2R|6915	0.518	1.2e-06	0.00039
chr14.trna18-TyrGTA@1.23.23_1_8|Out	SLC35B4|84912	0.518	1.2e-06	0.00039
chr1.trna111-HisGTG@9.31.23_1_10	PON2|5445	0.518	1.2e-06	0.00039
chr1.trna111-HisGTG@9.29.21_1_10|Out	GMNN|51053	0.518	1.2e-06	0.00039
chr1.trna116-GluCTC@1.29.29_1_8|Out	C6orf153|88745	0.518	1.2e-06	0.00039
chr15.trna7-GlnCTG@29.53.25_1_11	GNAI3|2773	0.518	1.2e-06	0.00039
chr16.trna11-ProAGG@1.25.25_3_19|Out	SLC31A1|1317	0.518	1.2e-06	0.0004
chr15.trna7-GlnCTG@21.42.22_1_12|Out	FAH|2184	0.518	1.2e-06	0.0004
chr17.trna18-ArgCCT@1.19.19_1_3	EDF1|8721	0.518	1.2e-06	0.0004
chr6.trna10-AlaCGC@1.23.23_3_8	MOBKL3|25843	0.518	1.2e-06	0.0004
chr1.trna116-GluCTC@51.75CCA.25_3_11	ARL4A|10124	0.518	1.2e-06	0.0004
chr17.trna16-GlnTTG@17.33.17_2_12|Out	LDLR|3949	0.517	1.2e-06	0.0004
chr1.trna111-HisGTG@13.34.22_1_9	FAM125A|93343	0.517	1.2e-06	0.0004
chr17.trna16-GlnTTG@8.30.23_2_13|Out	SBF1|6305	0.517	1.2e-06	0.0004
chr1.trna111-HisGTG@8.29.22_1_10|Out	EIF3B|8662	0.517	1.2e-06	0.0004
chr17.trna16-GlnTTG@8.33.26_2_12|Out	EIF2S1|1965	0.517	1.2e-06	0.0004
chr1.trna86-ArgTCT@1.19.19_1_1	UFD1L|7353	0.517	1.2e-06	0.0004
chr17.trna18-ArgCCT@35.54.20_1_5	GSTT2|2953	0.517	1.2e-06	0.0004
chr1.trna68-GlyGCC@1.27.27_2_10|Out	ZMYND19|116225	0.517	1.2e-06	0.0004
chr1.trna116-GluCTC@1.29.29_1_8|Out	NPTX1|4884	0.517	1.2e-06	0.0004
chr1.trna35-GlyGCC@19.39.21_1_12	NIPA2|81614	0.517	1.2e-06	0.0004
chr17.trna42-LeuTAG@1.19.19_2_9	MRPL4|51073	0.517	1.2e-06	0.0004
chr1.trna35-GlyGCC@1.29.29_1_5	NR4A3|8013	0.517	1.2e-06	0.0004
chr1.trna35-GlyGCC@1.30.30_1_5	STRAP|11171	0.517	1.2e-06	0.0004
chr17.trna16-GlnTTG@11.33.23_2_12|Out	PSMA4|5685	0.517	1.2e-06	0.0004
chr14.trna18-TyrGTA@1.23.23_1_8|Out	ACTR3B|57180	0.517	1.3e-06	0.0004
chr1.trna35-GlyGCC@1.28.28_1_5	NAA35|60560	0.517	1.3e-06	0.0004
chr1.trna9-ArgTCT@1.19.19_1_1	DMAP1|55929	0.517	1.3e-06	0.0004
chr1.trna35-GlyGCC@1.29.29_1_5	ASB4|51666	0.517	1.3e-06	0.0004
chr13.trna5-GluTTC@1.22.22_1_2	DDT|1652	0.517	1.3e-06	0.0004
chr13.trna5-GluTTC@1.30.30_1_2	SLC31A1|1317	0.517	1.3e-06	0.0004
chr15.trna7-GlnCTG@29.53.25_1_11	WDR5|11091	0.517	1.3e-06	0.0004
chr16.trna11-ProAGG@1.25.25_3_19|Out	POLR2D|5433	0.517	1.3e-06	0.0004
chr17.trna18-ArgCCT@1.19.19_1_3	NOL12|79159	0.517	1.3e-06	0.0004
chr1.trna35-GlyGCC@1.29.29_1_5	CALM2|805	0.517	1.3e-06	0.0004
chr1.trna111-HisGTG@16.34.19_1_9	NDOR1|27158	0.517	1.3e-06	0.00041
chr17.trna4-ArgTCT@1.19.19_1_4|Out	ZNHIT1|10467	0.517	1.3e-06	0.00041
chr1.trna68-GlyGCC@1.28.28_2_10|Out	LSM4|25804	0.517	1.3e-06	0.00041
chr1.trna99-ValCAC@1.30.30_2_2	CYP51A1|1595	0.517	1.3e-06	0.00041
chr6.trna10-AlaCGC@1.23.23_3_8	ERO1L|30001	0.517	1.3e-06	0.00041
chr6.trna10-AlaCGC@1.23.23_3_8	C14orf1|11161	0.517	1.3e-06	0.00041
chr1.trna35-GlyGCC@1.22.22_1_5|Out	FAM108B1|51104	0.517	1.3e-06	0.00041
chr13.trna3-GluTTC@1.23.23_1_2	SLTM|79811	0.517	1.3e-06	0.00041
chr1.trna111-HisGTG@1.30.30_1_9	ZNF92|168374	0.516	1.3e-06	0.00041
chr6.trna10-AlaCGC@1.22.22_3_8	SNX6|58533	0.516	1.3e-06	0.00041
chr15.trna7-GlnCTG@8.34.27_1_7|Out	ARL4A|10124	0.516	1.3e-06	0.00041
chr1.trna111-HisGTG@16.33.18_1_9	PSPH|5723	0.516	1.3e-06	0.00041
chr1.trna111-HisGTG@9.29.21_1_10|Out	ATP6V0B|533	0.516	1.3e-06	0.00041
chr15.trna7-GlnCTG@10.34.25_1_7|Out	SRP9|6726	0.516	1.3e-06	0.00041
chr6.trna10-AlaCGC@1.19.19_3_8	HMGCS1|3157	0.516	1.3e-06	0.00041
chr6.trna108-AlaAGC@58.75CCA.18_1_1	CDKN2B|1030	0.516	1.3e-06	0.00041
chr14.trna18-TyrGTA@1.25.25_1_8|Out	PANK3|79646	0.516	1.3e-06	0.00041
chr19.trna2-GlyTCC@28.53.26_1_8	GLRX|2745	0.516	1.3e-06	0.00041
chr2.trna2-TyrGTA@59.76CCA.18_1_7	AKR7A2|8574	0.516	1.3e-06	0.00041
chr1.trna111-HisGTG@8.29.22_1_10|Out	CHEK2|11200	0.516	1.3e-06	0.00042
chr1.trna69-AspGTC@52.75CCA.24_1_12	RPS12|6206	0.516	1.3e-06	0.00042
chr1.trna111-HisGTG@15.34.20_1_9	ATG4D|84971	0.516	1.3e-06	0.00042
chr6.trna10-AlaCGC@1.23.23_3_8	TSPAN17|26262	0.516	1.3e-06	0.00042
chr1.trna111-HisGTG@15.34.20_1_9	MRPL41|64975	0.516	1.3e-06	0.00042
chr19.trna2-GlyTCC@28.53.26_1_8	ETF1|2107	0.516	1.3e-06	0.00042
chr1.trna116-GluCTC@51.75CCA.25_3_11	ISG20|3669	0.516	1.3e-06	0.00042
chr1.trna111-HisGTG@9.31.23_1_10	PSMB5|5693	0.516	1.3e-06	0.00042
chr1.trna35-GlyGCC@1.27.27_1_5|Out	CHEK2|11200	0.516	1.3e-06	0.00042
chr1.trna111-HisGTG@11.34.24_1_9	CKS2|1164	0.516	1.3e-06	0.00042
chr1.trna32-MetCAT@35.57.23_1_8	TATDN3|128387	0.516	1.3e-06	0.00042
chr1.trna9-ArgTCT@1.19.19_1_1	PSMG3|84262	0.516	1.3e-06	0.00042
chr1.trna111-HisGTG@9.32.24_1_9	CD83|9308	0.516	1.3e-06	0.00042
chr1.trna111-HisGTG@8.29.22_1_10|Out	ZC3H15|55854	0.516	1.3e-06	0.00042
chr1.trna35-GlyGCC@1.27.27_1_5|Out	MED27|9442	0.516	1.4e-06	0.00042
chr7.trna5-CysGCA@10.33.24_1_7|Out	CALM2|805	0.516	1.4e-06	0.00042
chr1.trna35-GlyGCC@1.30.30_1_5	TYRO3|7301	0.516	1.4e-06	0.00042
chr1.trna111-HisGTG@3.30.28_1_9	SLC5A6|8884	0.516	1.4e-06	0.00042
chr1.trna68-GlyGCC@3.27.25_2_10|Out	TOMM5|401505	0.516	1.4e-06	0.00042
chr1.trna111-HisGTG@5.30.26_1_10|Out	PPM1G|5496	0.516	1.4e-06	0.00043
chr1.trna68-GlyGCC@3.27.25_2_10|Out	RBX1|9978	0.516	1.4e-06	0.00043
chr17.trna15-CysGCA@1.29.29_1_5|Out	PPAT|5471	0.516	1.4e-06	0.00043
chr1.trna69-AspGTC@52.75CCA.24_1_12	GGCT|79017	0.516	1.4e-06	0.00043
chr1.trna35-GlyGCC@1.30.30_1_5	POR|5447	0.515	1.4e-06	0.00043
chr1.trna35-GlyGCC@1.29.29_1_5	GUSB|2990	0.515	1.4e-06	0.00043
chr14.trna7-ArgACG@1.19.19_1_7|Out	PSENEN|55851	0.515	1.4e-06	0.00043
chr16.trna11-ProAGG@1.30.30_3_18|Out	FDPS|2224	0.515	1.4e-06	0.00043
chr17.trna16-GlnTTG@8.30.23_2_13|Out	ARL4A|10124	0.515	1.4e-06	0.00043
chr1.trna111-HisGTG@8.29.22_1_10|Out	NCLN|56926	0.515	1.4e-06	0.00043
chr1.trna111-HisGTG@11.34.24_1_9	RBX1|9978	0.515	1.4e-06	0.00043
chr1.trna35-GlyGCC@1.22.22_1_5|Out	SLC1A2|6506	0.515	1.4e-06	0.00043
chr17.trna18-ArgCCT@35.54.20_1_5	MRPL4|51073	0.515	1.4e-06	0.00043
chr17.trna19-ArgTCG@1.19.19_1_1	PFDN2|5202	0.515	1.4e-06	0.00043
chr1.trna35-GlyGCC@1.22.22_1_5|Out	SLC25A17|10478	0.515	1.4e-06	0.00043
chr1.trna111-HisGTG@16.33.18_1_9	RAN|5901	0.515	1.4e-06	0.00043
chr15.trna7-GlnCTG@12.34.23_1_7|Out	SRP9|6726	0.515	1.4e-06	0.00043
chr17.trna19-ArgTCG@1.19.19_1_1	NOL12|79159	0.515	1.4e-06	0.00043
chr13.trna3-GluTTC@1.22.22_1_2	HERC2|8924	0.515	1.4e-06	0.00043
chr6.trna110-AlaTGC@1.19.19_5_13	IDH1|3417	0.515	1.4e-06	0.00043
chr1.trna117-GlyTCC@1.30.30_1_6|Out	TIMM17A|10440	0.515	1.4e-06	0.00043
chr17.trna16-GlnTTG@10.33.24_2_12|Out	ELOVL1|64834	0.515	1.4e-06	0.00043
chr1.trna111-HisGTG@9.31.23_1_10	WNT5A|7474	0.515	1.4e-06	0.00043
chr1.trna68-GlyGCC@1.29.29_2_10|Out	QSOX2|169714	0.515	1.4e-06	0.00043
chr1.trna35-GlyGCC@1.23.23_1_5|Out	MSI2|124540	0.515	1.4e-06	0.00044
chr1.trna35-GlyGCC@12.32.21_4_18|Out	PTPRF|5792	0.515	1.4e-06	0.00044
chr1.trna68-GlyGCC@3.29.27_2_10|Out	LOC90784|90784	0.515	1.4e-06	0.00044
chr15.trna7-GlnCTG@11.34.24_1_7|Out	EPT1|85465	0.515	1.4e-06	0.00044
chr19.trna2-GlyTCC@28.53.26_1_8	EPRS|2058	0.515	1.4e-06	0.00044
chr1.trna47-AsnGTT@1.20.20_2_19	SLC31A1|1317	0.515	1.4e-06	0.00044
chr17.trna18-ArgCCT@1.19.19_1_3	TRAPPC5|126003	0.515	1.4e-06	0.00044
chr1.trna111-HisGTG@3.30.28_1_9	FARSB|10056	0.515	1.4e-06	0.00044
chr17.trna16-GlnTTG@11.33.23_2_12|Out	FASN|2194	0.515	1.4e-06	0.00044
chr1.trna116-GluCTC@1.29.29_1_8|Out	PTPRF|5792	0.515	1.4e-06	0.00044
chr15.trna4-ArgTCG@1.19.19_2_4	TRA2A|29896	0.515	1.4e-06	0.00044
chr6.trna110-AlaTGC@1.19.19_5_13	EPT1|85465	0.514	1.4e-06	0.00044
chr1.trna35-GlyGCC@1.28.28_1_5	PSMB5|5693	0.514	1.4e-06	0.00044
chr17.trna18-ArgCCT@1.19.19_1_3	ELOF1|84337	0.514	1.4e-06	0.00044
chr6.trna10-AlaCGC@1.23.23_3_8	SCARB1|949	0.514	1.4e-06	0.00044
chr17.trna16-GlnTTG@7.33.27_2_12	ACP1|52	0.514	1.5e-06	0.00044
chr1.trna68-GlyGCC@1.28.28_2_10|Out	RHOB|388	0.514	1.5e-06	0.00044
chr13.trna3-GluTTC@1.24.24_1_2	PPIL5|122769	0.514	1.5e-06	0.00044
chr6.trna108-AlaAGC@58.75CCA.18_1_1	STX2|2054	0.514	1.5e-06	0.00044
chr1.trna111-HisGTG@9.29.21_1_10|Out	WNT5A|7474	0.514	1.5e-06	0.00044
chr1.trna54-LysTTT@1.30.30_1_6	TIPRL|261726	0.514	1.5e-06	0.00045
chr1.trna116-GluCTC@1.29.29_1_8|Out	AACS|65985	0.514	1.5e-06	0.00045
chr14.trna13-LysCTT@1.30.30_1_3	DHX57|90957	0.514	1.5e-06	0.00045
chr17.trna19-ArgTCG@1.19.19_1_1	NFKBIB|4793	0.514	1.5e-06	0.00045
chr16.trna11-ProAGG@1.30.30_3_18|Out	SLC16A1|6566	0.514	1.5e-06	0.00045
chr3.trna7-CysGCA@1.29.29_1_1	ATG4A|115201	0.514	1.5e-06	0.00045
chr1.trna34-LeuCAG@65.86CCA.22_1_7	CLPTM1L|81037	0.514	1.5e-06	0.00045
chr16.trna11-ProAGG@1.30.30_3_18|Out	TMCO1|54499	0.514	1.5e-06	0.00045
chr1.trna35-GlyGCC@1.22.22_1_5|Out	UST|10090	0.514	1.5e-06	0.00045
chr1.trna111-HisGTG@8.30.23_1_10|Out	TIMM17A|10440	0.514	1.5e-06	0.00045
chr14.trna18-TyrGTA@1.25.25_1_8|Out	HMGCR|3156	0.514	1.5e-06	0.00045
chr1.trna32-MetCAT@34.56.23_1_8	DHCR7|1717	0.514	1.5e-06	0.00045
chr14.trna18-TyrGTA@1.23.23_1_8|Out	SLC30A5|64924	0.514	1.5e-06	0.00045
chr1.trna68-GlyGCC@1.29.29_2_10|Out	EIF4E2|9470	0.514	1.5e-06	0.00045
chr7.trna5-CysGCA@8.32.25_2_8|Out	CBX3|11335	0.514	1.5e-06	0.00045
chr15.trna7-GlnCTG@11.34.24_1_7|Out	NPTX1|4884	0.514	1.5e-06	0.00045
chr1.trna116-GluCTC@1.28.28_1_8|Out	ATG4D|84971	0.514	1.5e-06	0.00045
chr17.trna16-GlnTTG@8.30.23_2_13|Out	RCN2|5955	0.514	1.5e-06	0.00045
chr1.trna111-HisGTG@9.32.24_1_9	ASL|435	0.514	1.5e-06	0.00045
chr17.trna19-ArgTCG@1.19.19_1_1	ZMYND19|116225	0.514	1.5e-06	0.00045
chr1.trna35-GlyGCC@1.29.29_1_5	PGRMC1|10857	0.514	1.5e-06	0.00045
chr1.trna86-ArgTCT@1.19.19_1_1	WDR77|79084	0.514	1.5e-06	0.00045
chr14.trna18-TyrGTA@1.23.23_1_8|Out	YTHDC2|64848	0.514	1.5e-06	0.00045
chr6.trna10-AlaCGC@1.19.19_3_8	CBX3|11335	0.514	1.5e-06	0.00045
chr7.trna5-CysGCA@10.33.24_1_7|Out	LDLR|3949	0.514	1.5e-06	0.00045
chr1.trna111-HisGTG@9.31.23_1_10	ZC3H15|55854	0.514	1.5e-06	0.00045
chr1.trna68-GlyGCC@3.29.27_2_10|Out	MEMO1|51072	0.514	1.5e-06	0.00045
chr17.trna16-GlnTTG@11.33.23_2_12|Out	IDI1|3422	0.514	1.5e-06	0.00045
chr1.trna111-HisGTG@8.30.23_1_10|Out	FBXL18|80028	0.514	1.5e-06	0.00046
chr1.trna116-GluCTC@52.75CCA.24_3_13	RIOK1|83732	0.514	1.5e-06	0.00046
chr17.trna16-GlnTTG@11.33.23_2_12|Out	NSDHL|50814	0.514	1.5e-06	0.00046
chr7.trna5-CysGCA@10.33.24_1_7|Out	MSH6|2956	0.514	1.5e-06	0.00046
chr2.trna2-TyrGTA@59.76CCA.18_1_7	NSDHL|50814	0.514	1.5e-06	0.00046
chr15.trna4-ArgTCG@1.19.19_2_4	RHBDD2|57414	0.514	1.5e-06	0.00046
chr1.trna32-MetCAT@34.56.23_1_8	C1orf212|113444	0.514	1.5e-06	0.00046
chr1.trna111-HisGTG@8.31.24_1_10	STRAP|11171	0.513	1.5e-06	0.00046
chr1.trna111-HisGTG@8.30.23_1_10|Out	TMEM120B|144404	0.513	1.5e-06	0.00046
chr17.trna16-GlnTTG@16.31.16_2_12|Out	GSTT2|2953	0.513	1.5e-06	0.00046
chr1.trna68-GlyGCC@1.29.29_2_10|Out	HAT1|8520	0.513	1.5e-06	0.00046
chr1.trna111-HisGTG@35.56.22_1_10	CPLX2|10814	0.513	1.5e-06	0.00046
chr15.trna7-GlnCTG@20.41.22_1_7	TMBIM6|7009	0.513	1.5e-06	0.00046
chr1.trna111-HisGTG@9.31.23_1_10	AACS|65985	0.513	1.5e-06	0.00046
chr1.trna68-GlyGCC@1.29.29_2_10|Out	GMNN|51053	0.513	1.5e-06	0.00046
chr1.trna111-HisGTG@3.30.28_1_9	YIF1A|10897	0.513	1.5e-06	0.00046
chr1.trna111-HisGTG@8.29.22_1_10|Out	DBF4|10926	0.513	1.5e-06	0.00046
chr6.trna108-AlaAGC@58.75CCA.18_1_1	AIMP2|7965	0.513	1.5e-06	0.00046
chr3.trna7-CysGCA@1.29.29_1_1	GK|2710	0.513	1.5e-06	0.00046
chr14.trna7-ArgACG@1.19.19_1_7|Out	KRTCAP2|200185	0.513	1.5e-06	0.00046
chr17.trna42-LeuTAG@1.18.18_2_9	IDH1|3417	0.513	1.5e-06	0.00046
chr1.trna111-HisGTG@2.30.29_1_9	CCT6A|908	0.513	1.5e-06	0.00046
chr17.trna42-LeuTAG@1.20.20_2_9	TMEM9|252839	0.513	1.5e-06	0.00046
chr6.trna110-AlaTGC@1.19.19_5_13	NR5A1|2516	0.513	1.5e-06	0.00046
chr6.trna10-AlaCGC@58.75CCA.18_2_7	CEBPZ|10153	0.513	1.5e-06	0.00046
chr1.trna111-HisGTG@5.34.30_1_9	GLA|2717	0.513	1.6e-06	0.00046
chr1.trna32-MetCAT@34.56.23_1_8	RAN|5901	0.513	1.6e-06	0.00046
chr17.trna16-GlnTTG@10.33.24_2_12|Out	CYP51A1|1595	0.513	1.6e-06	0.00046
chr1.trna116-GluCTC@1.28.28_1_8|Out	RHOB|388	0.513	1.6e-06	0.00047
chr6.trna10-AlaCGC@1.19.19_3_8	UBE2M|9040	0.513	1.6e-06	0.00047
chr15.trna7-GlnCTG@15.34.20_1_7|Out	IER3IP1|51124	0.513	1.6e-06	0.00047
chr15.trna7-GlnCTG@15.34.20_1_7|Out	ELOVL1|64834	0.513	1.6e-06	0.00047
chr1.trna35-GlyGCC@1.28.28_1_5	NCLN|56926	0.513	1.6e-06	0.00047
chr1.trna111-HisGTG@8.29.22_1_10|Out	PTPRF|5792	0.513	1.6e-06	0.00047
chr17.trna19-ArgTCG@1.19.19_1_1	INO80E|283899	0.513	1.6e-06	0.00047
chr1.trna111-HisGTG@8.30.23_1_10|Out	VKORC1L1|154807	0.513	1.6e-06	0.00047
chr1.trna111-HisGTG@16.33.18_1_9	NOL10|79954	0.513	1.6e-06	0.00047
chr1.trna35-GlyGCC@1.29.29_1_5	LIPA|3988	0.513	1.6e-06	0.00047
chr1.trna86-ArgTCT@1.19.19_1_1	PDE6D|5147	0.513	1.6e-06	0.00047
chr1.trna111-HisGTG@13.34.22_1_9	MRPL41|64975	0.513	1.6e-06	0.00047
chr1.trna111-HisGTG@9.33.25_1_9	ACP1|52	0.513	1.6e-06	0.00047
chr1.trna9-ArgTCT@1.19.19_1_1	SERF2|10169	0.513	1.6e-06	0.00047
chr1.trna35-GlyGCC@1.30.30_1_5	TMEM120B|144404	0.513	1.6e-06	0.00047
chr2.trna2-TyrGTA@59.76CCA.18_1_7	IDH1|3417	0.513	1.6e-06	0.00047
chr6.trna10-AlaCGC@1.22.22_3_8	CYP51A1|1595	0.513	1.6e-06	0.00047
chr1.trna111-HisGTG@-1T.21.22_1_9	SUSD2|56241	0.513	1.6e-06	0.00047
chr1.trna111-HisGTG@9.29.21_1_10|Out	PIN1|5300	0.513	1.6e-06	0.00047
chr1.trna35-GlyGCC@1.27.27_1_5|Out	MOBKL3|25843	0.513	1.6e-06	0.00047
chr1.trna68-GlyGCC@1.29.29_2_10|Out	RARS2|57038	0.512	1.6e-06	0.00048
chr6.trna10-AlaCGC@1.19.19_3_8	RARS2|57038	0.512	1.6e-06	0.00048
chr6.trna110-AlaTGC@58.75CCA.18_2_5	NCBP1|4686	0.512	1.6e-06	0.00048
chr1.trna9-ArgTCT@1.19.19_1_1	PRELID1|27166	0.512	1.6e-06	0.00048
chr1.trna111-HisGTG@8.30.23_1_10|Out	C9orf119|375757	0.512	1.6e-06	0.00048
chr17.trna42-LeuTAG@68.85CCA.18_2_11	PPP6C|5537	0.512	1.6e-06	0.00048
chr17.trna18-ArgCCT@35.54.20_1_5	CHEK2|11200	0.512	1.6e-06	0.00048
chr17.trna16-GlnTTG@16.31.16_2_12|Out	PHF5A|84844	0.512	1.6e-06	0.00048
chr17.trna42-LeuTAG@1.20.20_2_9	GNAI3|2773	0.512	1.6e-06	0.00048
chr1.trna111-HisGTG@8.29.22_1_10|Out	POLD2|5425	0.512	1.6e-06	0.00048
chr1.trna35-GlyGCC@1.29.29_1_5	PON2|5445	0.512	1.6e-06	0.00048
chr1.trna111-HisGTG@16.33.18_1_9	HAUS2|55142	0.512	1.6e-06	0.00048
chr1.trna111-HisGTG@9.29.21_1_10|Out	INSIG1|3638	0.512	1.6e-06	0.00048
chr17.trna23-ArgCCG@1.19.19_1_1|Out	PFDN2|5202	0.512	1.6e-06	0.00048
chr1.trna68-GlyGCC@1.28.28_2_10|Out	EIF4E2|9470	0.512	1.6e-06	0.00048
chr16.trna11-ProAGG@1.30.30_3_18|Out	E2F6|1876	0.512	1.6e-06	0.00048
chr17.trna42-LeuTAG@1.19.19_2_9	SRP9|6726	0.512	1.6e-06	0.00048
chr1.trna35-GlyGCC@1.29.29_1_5	ZNF92|168374	0.512	1.6e-06	0.00048
chr13.trna3-GluTTC@1.23.23_1_2	EIF3J|8669	0.512	1.6e-06	0.00048
chr17.trna18-ArgCCT@1.19.19_1_3	SERF2|10169	0.512	1.6e-06	0.00048
chr1.trna111-HisGTG@8.30.23_1_10|Out	CHEK2|11200	0.512	1.6e-06	0.00048
chr15.trna7-GlnCTG@21.42.22_1_12|Out	C2CD2|25966	0.512	1.7e-06	0.00048
chr1.trna68-GlyGCC@1.29.29_2_10|Out	TROVE2|6738	0.512	1.7e-06	0.00048
chr17.trna16-GlnTTG@8.31.24_2_12|Out	PHF5A|84844	0.512	1.7e-06	0.00048
chr1.trna68-GlyGCC@1.29.29_2_10|Out	MRPL4|51073	0.512	1.7e-06	0.00048
chr1.trna111-HisGTG@5.30.26_1_10|Out	LSM4|25804	0.512	1.7e-06	0.00048
chr15.trna7-GlnCTG@11.34.24_1_7|Out	IDI1|3422	0.512	1.7e-06	0.00048
chr1.trna35-GlyGCC@1.29.29_1_5	UBE2S|27338	0.512	1.7e-06	0.00048
chr1.trna111-HisGTG@16.33.18_1_9	LRWD1|222229	0.512	1.7e-06	0.00049
chr1.trna111-HisGTG@13.34.22_1_9	GLA|2717	0.512	1.7e-06	0.00049
chr1.trna111-HisGTG@8.29.22_1_10|Out	GNRHR|2798	0.512	1.7e-06	0.00049
chr1.trna111-HisGTG@8.29.22_1_10|Out	ARL4A|10124	0.512	1.7e-06	0.00049
chr15.trna7-GlnCTG@21.42.22_1_12|Out	CCDC69|26112	0.512	1.7e-06	0.00049
chr1.trna35-GlyGCC@1.23.23_1_5|Out	PPP2R5C|5527	0.512	1.7e-06	0.00049
chr1.trna35-GlyGCC@1.22.22_1_5|Out	HNRNPH1|3187	0.512	1.7e-06	0.00049
chr15.trna7-GlnCTG@1.30.30_1_7	ACP1|52	0.512	1.7e-06	0.00049
chr19.trna2-GlyTCC@28.53.26_1_8	IFIT1|3434	0.512	1.7e-06	0.00049
chr1.trna111-HisGTG@9.31.23_1_10	EPRS|2058	0.512	1.7e-06	0.00049
chr1.trna111-HisGTG@9.29.21_1_10|Out	MVD|4597	0.512	1.7e-06	0.00049
chr1.trna116-GluCTC@1.29.29_1_8|Out	YIF1A|10897	0.512	1.7e-06	0.00049
chr1.trna111-HisGTG@9.29.21_1_10|Out	ZNF92|168374	0.512	1.7e-06	0.00049
chr1.trna111-HisGTG@16.35.20_1_9	ELOVL1|64834	0.512	1.7e-06	0.00049
chr1.trna116-GluCTC@1.29.29_1_8|Out	E2F6|1876	0.512	1.7e-06	0.00049
chr6.trna110-AlaTGC@1.24.24_5_13	RTCD1|8634	0.512	1.7e-06	0.00049
chr1.trna68-GlyGCC@1.29.29_2_10|Out	GREB1|9687	0.512	1.7e-06	0.00049
chr15.trna7-GlnCTG@12.34.23_1_7|Out	SLC31A1|1317	0.512	1.7e-06	0.00049
chr1.trna54-LysTTT@1.30.30_1_6	CYP51A1|1595	0.512	1.7e-06	0.00049
chr1.trna111-HisGTG@9.31.23_1_10	NPTX1|4884	0.512	1.7e-06	0.00049
chr7.trna5-CysGCA@10.33.24_1_7|Out	TIMM17A|10440	0.512	1.7e-06	0.00049
chr19.trna2-GlyTCC@28.53.26_1_8	SELS|55829	0.512	1.7e-06	0.00049
chr1.trna111-HisGTG@-1T.29.30_1_9	TPRKB|51002	0.512	1.7e-06	0.00049
chr1.trna111-HisGTG@16.35.20_1_9	SRP9|6726	0.512	1.7e-06	0.00049
chr17.trna18-ArgCCT@1.19.19_1_3	MRPS15|64960	0.512	1.7e-06	0.00049
chr1.trna111-HisGTG@9.31.23_1_10	CCT6A|908	0.512	1.7e-06	0.00049
chr1.trna32-MetCAT@33.56.24_1_8	SLC25A22|79751	0.511	1.7e-06	0.00049
chr2.trna2-TyrGTA@59.76CCA.18_1_7	EPRS|2058	0.511	1.7e-06	0.00049
chr6.trna10-AlaCGC@1.22.22_3_8	RAB4A|5867	0.511	1.7e-06	0.00049
chr1.trna111-HisGTG@9.31.23_1_10	PIN1|5300	0.511	1.7e-06	0.00049
chr1.trna35-GlyGCC@1.27.27_1_5|Out	NAA35|60560	0.511	1.7e-06	0.00049
chr1.trna32-MetCAT@34.56.23_1_8	CCNB2|9133	0.511	1.7e-06	0.00049
chr1.trna35-GlyGCC@19.39.21_1_12	ALDH1B1|219	0.511	1.7e-06	0.00049
chr1.trna35-GlyGCC@1.29.29_1_5	RNASEH1|246243	0.511	1.7e-06	0.00049
chr6.trna110-AlaTGC@1.24.24_5_13	PANK3|79646	0.511	1.7e-06	0.00049
chr1.trna47-AsnGTT@1.20.20_2_19	TIMM17A|10440	0.511	1.7e-06	0.0005
chr15.trna7-GlnCTG@8.34.27_1_7|Out	HNRNPM|4670	0.511	1.7e-06	0.0005
chr2.trna2-TyrGTA@59.76CCA.18_1_7	HSPD1|3329	0.511	1.7e-06	0.0005
chr5.trna15-ValAAC@1.20.20_1_1	GM2A|2760	0.511	1.7e-06	0.0005
chr1.trna111-HisGTG@1.30.30_1_9	UBE2S|27338	0.511	1.7e-06	0.0005
chr1.trna111-HisGTG@13.35.23_1_9	ELOVL1|64834	0.511	1.7e-06	0.0005
chr1.trna35-GlyGCC@3.30.28_1_5	ELOVL1|64834	0.511	1.7e-06	0.0005
chr1.trna35-GlyGCC@19.39.21_1_12	IL1R2|7850	0.511	1.7e-06	0.0005
chr1.trna47-AsnGTT@1.20.20_2_19	CBX3|11335	0.511	1.7e-06	0.0005
chr6.trna110-AlaTGC@1.19.19_5_13	TYRO3|7301	0.511	1.7e-06	0.0005
chr1.trna35-GlyGCC@1.22.22_1_5|Out	TYRO3|7301	0.511	1.7e-06	0.0005
chr1.trna9-ArgTCT@1.19.19_1_1	LOC388955|388955	0.511	1.7e-06	0.0005
chr14.trna18-TyrGTA@1.23.23_1_8|Out	RALGAPA1|253959	0.511	1.8e-06	0.0005
chr17.trna18-ArgCCT@35.54.20_1_5	GAS2L1|10634	0.511	1.8e-06	0.0005
chr1.trna69-AspGTC@51.73C.23_1_12	LYSMD1|388695	0.511	1.8e-06	0.0005
chr16.trna11-ProAGG@1.30.30_3_18|Out	CEBPZ|10153	0.511	1.8e-06	0.0005
chr1.trna116-GluCTC@1.28.28_1_8|Out	NCLN|56926	0.511	1.8e-06	0.0005
chr1.trna116-GluCTC@1.28.28_1_8|Out	ILKAP|80895	0.511	1.8e-06	0.0005
chr13.trna5-GluTTC@1.22.22_1_2	DDTL|100037417	0.511	1.8e-06	0.0005
chr1.trna111-HisGTG@8.31.24_1_10	SLC30A7|148867	0.511	1.8e-06	0.0005
chr17.trna18-ArgCCT@35.54.20_1_5	FBXL18|80028	0.511	1.8e-06	0.00051
chr6.trna10-AlaCGC@1.24.24_3_8	GMNN|51053	0.511	1.8e-06	0.0005
chr1.trna111-HisGTG@16.34.19_1_9	MRPL41|64975	0.511	1.8e-06	0.00051
chr13.trna3-GluTTC@1.30.30_1_2	SRP9|6726	0.511	1.8e-06	0.00051
chr6.trna110-AlaTGC@58.75CCA.18_2_5	DPH3|285381	0.511	1.8e-06	0.00051
chr1.trna111-HisGTG@5.30.26_1_10|Out	SLC16A1|6566	0.511	1.8e-06	0.00051
chr1.trna111-HisGTG@15.34.20_1_9	UBE2M|9040	0.511	1.8e-06	0.00051
chr1.trna35-GlyGCC@1.23.23_1_5|Out	RCN2|5955	0.511	1.8e-06	0.00051
chr1.trna34-LeuCAG@70.86CCA.17_1_7|Out	KDM1B|221656	0.511	1.8e-06	0.00051
chr15.trna7-GlnCTG@15.34.20_1_7|Out	CHCHD2|51142	0.511	1.8e-06	0.00051
chr15.trna7-GlnCTG@11.34.24_1_7|Out	LOC90784|90784	0.51	1.8e-06	0.00051
chr7.trna5-CysGCA@10.33.24_1_7|Out	POLD2|5425	0.51	1.8e-06	0.00051
chr1.trna32-MetCAT@34.56.23_1_8	RHOB|388	0.51	1.8e-06	0.00051
chr6.trna10-AlaCGC@1.22.22_3_8	CBX3|11335	0.51	1.8e-06	0.00051
chr17.trna42-LeuTAG@1.20.20_2_9	CD83|9308	0.51	1.8e-06	0.00051
chr1.trna35-GlyGCC@3.30.28_1_5	LSM4|25804	0.51	1.8e-06	0.00051
chr13.trna3-GluTTC@1.30.30_1_2	HMGCR|3156	0.51	1.8e-06	0.00051
chr17.trna16-GlnTTG@37.58.22_2_10	PPCDC|60490	0.51	1.8e-06	0.00052
chr1.trna35-GlyGCC@1.23.23_1_5|Out	CNIH|10175	0.51	1.8e-06	0.00052
chr1.trna111-HisGTG@35.56.22_1_10	LONP1|9361	0.51	1.8e-06	0.00052
chr1.trna111-HisGTG@9.31.23_1_10	VKORC1L1|154807	0.51	1.8e-06	0.00052
chr2.trna2-TyrGTA@59.76CCA.18_1_7	EPT1|85465	0.51	1.8e-06	0.00052
chr1.trna116-GluCTC@1.30.30_1_8|Out	ELOVL1|64834	0.51	1.8e-06	0.00052
chr1.trna111-HisGTG@8.29.22_1_10|Out	ORC5L|5001	0.51	1.8e-06	0.00052
chr14.trna18-TyrGTA@1.23.23_1_8|Out	ZNF131|7690	0.51	1.8e-06	0.00052
chr1.trna35-GlyGCC@1.29.29_1_5	AIMP2|7965	0.51	1.8e-06	0.00052
chr17.trna18-ArgCCT@1.19.19_1_3	TRAPPC1|58485	0.51	1.8e-06	0.00052
chr16.trna11-ProAGG@1.25.25_3_19|Out	SRP9|6726	0.51	1.8e-06	0.00052
chr1.trna111-HisGTG@8.31.24_1_10	CBX3|11335	0.51	1.8e-06	0.00052
chr13.trna3-GluTTC@1.22.22_1_2	EIF3J|8669	0.51	1.8e-06	0.00052
chr13.trna3-GluTTC@1.30.30_1_2	RTCD1|8634	0.51	1.8e-06	0.00052
chr6.trna16-TyrGTA@1.25.25_1_3|Out	LOC729082|729082	0.51	1.9e-06	0.00052
chr1.trna111-HisGTG@5.30.26_1_10|Out	LOC729082|729082	0.51	1.9e-06	0.00052
chr1.trna111-HisGTG@3.30.28_1_9	PIN1|5300	0.51	1.9e-06	0.00052
chr1.trna68-GlyGCC@1.29.29_2_10|Out	SCAP|22937	0.51	1.9e-06	0.00052
chr1.trna68-GlyGCC@1.27.27_2_10|Out	COPS7B|64708	0.51	1.9e-06	0.00052
chr1.trna69-AspGTC@51.73C.23_1_12	CCT6A|908	0.51	1.9e-06	0.00052
chr2.trna2-TyrGTA@59.76CCA.18_1_7	SCAP|22937	0.51	1.9e-06	0.00052
chr17.trna16-GlnTTG@15.33.19_2_12|Out	POR|5447	0.51	1.9e-06	0.00052
chr14.trna7-ArgACG@1.19.19_1_7|Out	PSMG3|84262	0.51	1.9e-06	0.00052
chr7.trna5-CysGCA@10.33.24_1_7|Out	SMAD2|4087	0.51	1.9e-06	0.00052
chr1.trna111-HisGTG@11.34.24_1_9	PFDN2|5202	0.51	1.9e-06	0.00052
chr1.trna111-HisGTG@2.30.29_1_9	DPH3|285381	0.51	1.9e-06	0.00053
chr15.trna7-GlnCTG@11.34.24_1_7|Out	CHEK2|11200	0.51	1.9e-06	0.00053
chr6.trna10-AlaCGC@1.19.19_3_8	DPH2|1802	0.51	1.9e-06	0.00053
chr3.trna7-CysGCA@1.29.29_1_1	TMEM33|55161	0.51	1.9e-06	0.00053
chr17.trna18-ArgCCT@1.19.19_1_3	POLR2I|5438	0.51	1.9e-06	0.00053
chr1.trna111-HisGTG@-1A.23.24_1_9	PRELP|5549	0.51	1.9e-06	0.00053
chr1.trna111-HisGTG@5.30.26_1_10|Out	GMNN|51053	0.51	1.9e-06	0.00053
chr1.trna116-GluCTC@52.75CCA.24_3_13	CHEK2|11200	0.51	1.9e-06	0.00053
chr7.trna5-CysGCA@9.32.24_2_8|Out	HMGCR|3156	0.509	1.9e-06	0.00053
chr17.trna18-ArgCCT@1.19.19_1_3	NOP16|51491	0.509	1.9e-06	0.00053
chr1.trna111-HisGTG@8.30.23_1_10|Out	MRPL4|51073	0.509	1.9e-06	0.00053
chr6.trna10-AlaCGC@1.22.22_3_8	ERO1L|30001	0.509	1.9e-06	0.00053
chr1.trna35-GlyGCC@1.30.30_1_5	ALDH1B1|219	0.509	1.9e-06	0.00053
chr1.trna111-HisGTG@9.29.21_1_10|Out	PDE6D|5147	0.509	1.9e-06	0.00053
chr17.trna4-ArgTCT@1.19.19_1_4|Out	MPHOSPH10|10199	0.509	1.9e-06	0.00053
chr1.trna111-HisGTG@13.34.22_1_9	NDUFA7|4701	0.509	1.9e-06	0.00053
chr1.trna111-HisGTG@13.33.21_1_9	YIPF4|84272	0.509	1.9e-06	0.00053
chr1.trna68-GlyGCC@1.29.29_2_10|Out	SLC16A1|6566	0.509	1.9e-06	0.00053
chr6.trna110-AlaTGC@1.19.19_5_13	BTN2A2|10385	0.509	1.9e-06	0.00053
chr1.trna111-HisGTG@8.30.23_1_10|Out	SELS|55829	0.509	1.9e-06	0.00053
chr15.trna7-GlnCTG@11.34.24_1_7|Out	HMGCS1|3157	0.509	1.9e-06	0.00054
chr17.trna18-ArgCCT@35.54.20_1_5	CALM2|805	0.509	1.9e-06	0.00054
chr6.trna101-AlaAGC@1.30.30_2_6	GK|2710	0.509	1.9e-06	0.00054
chr1.trna111-HisGTG@8.30.23_1_10|Out	CEBPZ|10153	0.509	2e-06	0.00054
chr1.trna35-GlyGCC@1.29.29_1_5	RDH11|51109	0.509	2e-06	0.00054
chr1.trna35-GlyGCC@1.29.29_1_5	KPNA2|3838	0.509	2e-06	0.00054
chr1.trna111-HisGTG@8.30.23_1_10|Out	SEC61G|23480	0.509	2e-06	0.00054
chr17.trna23-ArgCCG@1.19.19_1_1|Out	SHFM1|7979	0.509	2e-06	0.00054
chr1.trna54-LysTTT@1.30.30_1_6	PTS|5805	0.509	2e-06	0.00054
chr13.trna5-GluTTC@1.22.22_1_2	SRP9|6726	0.509	2e-06	0.00054
chr17.trna42-LeuTAG@1.24.24_2_9	SLC25A39|51629	0.509	2e-06	0.00054
chr6.trna16-TyrGTA@32.54.23_1_12	GSTT2|2953	0.509	2e-06	0.00054
chr2.trna2-TyrGTA@59.76CCA.18_1_7	POC1A|25886	0.509	2e-06	0.00054
chr7.trna5-CysGCA@10.33.24_1_7|Out	POR|5447	0.509	2e-06	0.00054
chr1.trna68-GlyGCC@1.29.29_2_10|Out	YBX1|4904	0.509	2e-06	0.00054
chr1.trna34-LeuCAG@65.86CCA.22_1_7	NIPA2|81614	0.509	2e-06	0.00054
chr6.trna10-AlaCGC@1.23.23_3_8	CSNK1G2|1455	0.509	2e-06	0.00054
chr1.trna35-GlyGCC@1.28.28_1_5	NR5A1|2516	0.509	2e-06	0.00054
chr17.trna18-ArgCCT@1.19.19_1_3	TAF6|6878	0.509	2e-06	0.00054
chr1.trna111-HisGTG@8.34.27_1_9	PSENEN|55851	0.509	2e-06	0.00054
chr17.trna42-LeuTAG@1.19.19_2_9	C9orf119|375757	0.509	2e-06	0.00054
chr1.trna111-HisGTG@-1A.23.24_1_9	SUSD2|56241	0.509	2e-06	0.00054
chr6.trna10-AlaCGC@1.19.19_3_8	C6orf211|79624	0.509	2e-06	0.00054
chr17.trna16-GlnTTG@8.30.23_2_13|Out	SLC31A1|1317	0.509	2e-06	0.00055
chr1.trna35-GlyGCC@1.27.27_1_5|Out	LRP11|84918	0.509	2e-06	0.00055
chr1.trna111-HisGTG@8.29.22_1_10|Out	RHOB|388	0.509	2e-06	0.00055
chr15.trna7-GlnCTG@12.34.23_1_7|Out	SF3B14|51639	0.509	2e-06	0.00055
chr15.trna7-GlnCTG@24.44.21_1_12|Out	UBA1|7317	0.509	2e-06	0.00055
chr1.trna111-HisGTG@16.31.16_1_10|Out	EPT1|85465	0.509	2e-06	0.00055
chr1.trna35-GlyGCC@1.27.27_1_5|Out	ATG4D|84971	0.509	2e-06	0.00055
chr1.trna35-GlyGCC@1.30.30_1_5	PSMB5|5693	0.508	2e-06	0.00055
chr1.trna111-HisGTG@8.31.24_1_10	AIMP2|7965	0.508	2e-06	0.00055
chr15.trna7-GlnCTG@11.34.24_1_7|Out	FARSB|10056	0.508	2e-06	0.00055
chr14.trna18-TyrGTA@1.23.23_1_8|Out	SLC36A1|206358	0.508	2e-06	0.00055
chr6.trna10-AlaCGC@1.24.24_3_8	ERO1L|30001	0.508	2e-06	0.00055
chr1.trna111-HisGTG@5.30.26_1_10|Out	TMEM120B|144404	0.508	2e-06	0.00055
chr13.trna5-GluTTC@1.22.22_1_2	NUP50|10762	0.508	2e-06	0.00055
chr1.trna116-GluCTC@1.27.27_1_8|Out	ELOVL1|64834	0.508	2e-06	0.00055
chr15.trna4-ArgTCG@1.19.19_2_4	ARV1|64801	0.508	2e-06	0.00055
chr1.trna116-GluCTC@1.28.28_1_8|Out	TIMM17A|10440	0.508	2e-06	0.00055
chr1.trna35-GlyGCC@1.23.23_1_5|Out	NKAIN1|79570	0.508	2e-06	0.00055
chr1.trna111-HisGTG@16.34.19_1_9	PDE6D|5147	0.508	2e-06	0.00055
chr1.trna111-HisGTG@8.34.27_1_9	DDA1|79016	0.508	2e-06	0.00055
chr15.trna7-GlnCTG@11.34.24_1_7|Out	PSMB5|5693	0.508	2e-06	0.00055
chr17.trna42-LeuTAG@1.19.19_2_9	ELOVL1|64834	0.508	2e-06	0.00055
chr1.trna111-HisGTG@9.31.23_1_10	RRM1|6240	0.508	2e-06	0.00055
chr1.trna35-GlyGCC@1.22.22_1_5|Out	CNIH|10175	0.508	2e-06	0.00055
chr17.trna18-ArgCCT@1.19.19_1_3	ATP5J2|9551	0.508	2e-06	0.00055
chr6.trna10-AlaCGC@1.23.23_3_8	CDKN2D|1032	0.508	2e-06	0.00056
chr1.trna111-HisGTG@2.30.29_1_9	ARL4A|10124	0.508	2e-06	0.00056
chr1.trna116-GluCTC@1.29.29_1_8|Out	RAN|5901	0.508	2.1e-06	0.00056
chr1.trna69-AspGTC@51.75CCA.25_1_12	TOMM6|100188893	0.508	2.1e-06	0.00056
chr7.trna5-CysGCA@10.33.24_1_7|Out	CCT6A|908	0.508	2.1e-06	0.00056
chr1.trna111-HisGTG@16.35.20_1_9	CCT6A|908	0.508	2.1e-06	0.00056
chr1.trna111-HisGTG@9.29.21_1_10|Out	PECI|10455	0.508	2.1e-06	0.00056
chr7.trna5-CysGCA@10.33.24_1_7|Out	FDPS|2224	0.508	2.1e-06	0.00056
chr7.trna5-CysGCA@9.32.24_2_8|Out	PTPRF|5792	0.508	2.1e-06	0.00056
chr17.trna18-ArgCCT@1.19.19_1_3	AGAP4|119016	0.508	2.1e-06	0.00056
chr1.trna68-GlyGCC@1.28.28_2_10|Out	MOBKL3|25843	0.508	2.1e-06	0.00056
chr1.trna111-HisGTG@1.30.30_1_9	ELOVL1|64834	0.508	2.1e-06	0.00056
chr15.trna7-GlnCTG@11.34.24_1_7|Out	ISG20|3669	0.508	2.1e-06	0.00056
chr1.trna111-HisGTG@15.34.20_1_9	RHBDD2|57414	0.508	2.1e-06	0.00056
chr1.trna68-GlyGCC@1.29.29_2_10|Out	PEX10|5192	0.508	2.1e-06	0.00056
chr17.trna42-LeuTAG@1.22.22_2_9	SRP9|6726	0.508	2.1e-06	0.00056
chr17.trna16-GlnTTG@11.33.23_2_12|Out	EBP|10682	0.508	2.1e-06	0.00056
chr1.trna35-GlyGCC@1.28.28_1_5	PCSK6|5046	0.508	2.1e-06	0.00056
chr1.trna68-GlyGCC@1.27.27_2_10|Out	MRPL50|54534	0.508	2.1e-06	0.00056
chr1.trna111-HisGTG@4.29.26_1_9|Out	LSM4|25804	0.508	2.1e-06	0.00056
chr1.trna111-HisGTG@9.31.23_1_10	ALPL|249	0.508	2.1e-06	0.00056
chr1.trna35-GlyGCC@1.28.28_1_5	ATG4D|84971	0.508	2.1e-06	0.00056
chr14.trna18-TyrGTA@1.23.23_1_8|Out	VDAC1|7416	0.508	2.1e-06	0.00056
chr1.trna32-MetCAT@33.56.24_1_8	ATP6V0B|533	0.508	2.1e-06	0.00056
chr7.trna5-CysGCA@10.33.24_1_7|Out	EIF2S1|1965	0.508	2.1e-06	0.00056
chr1.trna35-GlyGCC@1.27.27_1_5|Out	MAPKAP1|79109	0.508	2.1e-06	0.00057
chr6.trna10-AlaCGC@1.22.22_3_8	PLEKHJ1|55111	0.508	2.1e-06	0.00057
chr1.trna68-GlyGCC@1.29.29_2_10|Out	PON2|5445	0.508	2.1e-06	0.00057
chr1.trna111-HisGTG@9.34.26_1_9	PFDN6|10471	0.508	2.1e-06	0.00057
chr17.trna42-LeuTAG@1.20.20_2_9	YIF1A|10897	0.508	2.1e-06	0.00057
chr1.trna35-GlyGCC@1.22.22_1_5|Out	KIAA1715|80856	0.508	2.1e-06	0.00057
chr6.trna110-AlaTGC@1.19.19_5_13	STK19|8859	0.508	2.1e-06	0.00057
chr1.trna111-HisGTG@3.30.28_1_9	SRP9|6726	0.508	2.1e-06	0.00057
chr1.trna111-HisGTG@13.34.22_1_9	TPRKB|51002	0.508	2.1e-06	0.00057
chr1.trna35-GlyGCC@1.30.30_1_5	AACS|65985	0.507	2.1e-06	0.00057
chr1.trna111-HisGTG@9.34.26_1_9	UCK1|83549	0.507	2.1e-06	0.00057
chr7.trna5-CysGCA@9.32.24_2_8|Out	MOBKL3|25843	0.507	2.1e-06	0.00057
chr1.trna111-HisGTG@9.31.23_1_10	QSOX2|169714	0.507	2.1e-06	0.00057
chr1.trna35-GlyGCC@1.29.29_1_5	LTB4R|1241	0.507	2.1e-06	0.00057
chr17.trna16-GlnTTG@11.33.23_2_12|Out	TYRO3|7301	0.507	2.1e-06	0.00057
chr1.trna54-LysTTT@1.30.30_1_6	WDR77|79084	0.507	2.1e-06	0.00057
chr6.trna10-AlaCGC@1.19.19_3_8	RAB4A|5867	0.507	2.1e-06	0.00057
chr1.trna111-HisGTG@5.34.30_1_9	MRPL41|64975	0.507	2.1e-06	0.00057
chr1.trna116-GluCTC@1.28.28_1_8|Out	E2F6|1876	0.507	2.1e-06	0.00057
chr7.trna5-CysGCA@10.33.24_1_7|Out	SRP9|6726	0.507	2.1e-06	0.00057
chr1.trna111-HisGTG@8.30.23_1_10|Out	EIF2S1|1965	0.507	2.1e-06	0.00057
chr1.trna47-AsnGTT@1.20.20_2_19	IER3IP1|51124	0.507	2.2e-06	0.00057
chr17.trna42-LeuTAG@1.19.19_2_9	PTPRF|5792	0.507	2.2e-06	0.00057
chr1.trna35-GlyGCC@1.29.29_1_5	NCBP1|4686	0.507	2.2e-06	0.00057
chr14.trna18-TyrGTA@1.23.23_1_8|Out	ING3|54556	0.507	2.2e-06	0.00057
chr1.trna111-HisGTG@9.31.23_1_10	DCUN1D5|84259	0.507	2.2e-06	0.00057
chr17.trna18-ArgCCT@35.54.20_1_5	ABLIM2|84448	0.507	2.2e-06	0.00058
chr1.trna35-GlyGCC@12.32.21_4_18|Out	HMGCR|3156	0.507	2.2e-06	0.00058
chr14.trna18-TyrGTA@1.23.23_1_8|Out	BDP1|55814	0.507	2.2e-06	0.00058
chr15.trna7-GlnCTG@29.53.25_1_11	IL1R2|7850	0.507	2.2e-06	0.00058
chr1.trna35-GlyGCC@1.29.29_1_5	WNT5A|7474	0.507	2.2e-06	0.00058
chr1.trna111-HisGTG@-1T.23.24_1_9	TAGLN|6876	0.507	2.2e-06	0.00058
chr6.trna10-AlaCGC@1.22.22_3_8	CHCHD2|51142	0.507	2.2e-06	0.00058
chr6.trna10-AlaCGC@1.22.22_3_8	TMEM120B|144404	0.507	2.2e-06	0.00058
chr1.trna116-GluCTC@1.29.29_1_8|Out	COPS7B|64708	0.507	2.2e-06	0.00058
chr17.trna4-ArgTCT@1.19.19_1_4|Out	CKS2|1164	0.507	2.2e-06	0.00058
chr1.trna35-GlyGCC@1.29.29_1_5	PLD5|200150	0.507	2.2e-06	0.00058
chr1.trna111-HisGTG@8.31.24_1_10	PDXP|57026	0.507	2.2e-06	0.00058
chr1.trna68-GlyGCC@3.27.25_2_10|Out	DDA1|79016	0.507	2.2e-06	0.00058
chr13.trna3-GluTTC@1.30.30_1_2	LDLR|3949	0.507	2.2e-06	0.00058
chr1.trna69-AspGTC@51.73C.23_1_12	C18orf19|125228	0.507	2.2e-06	0.00058
chr1.trna35-GlyGCC@1.23.23_1_5|Out	LRP11|84918	0.507	2.2e-06	0.00058
chr1.trna111-HisGTG@5.30.26_1_10|Out	LRP11|84918	0.507	2.2e-06	0.00058
chr17.trna19-ArgTCG@1.19.19_1_1	ARV1|64801	0.507	2.2e-06	0.00058
chr17.trna4-ArgTCT@1.19.19_1_4|Out	WDR77|79084	0.507	2.2e-06	0.00058
chr17.trna18-ArgCCT@35.54.20_1_5	TFIP11|24144	0.507	2.2e-06	0.00058
chr1.trna35-GlyGCC@1.23.23_1_5|Out	SAMM50|25813	0.507	2.2e-06	0.00058
chr1.trna68-GlyGCC@1.24.24_2_10|Out	ELOVL1|64834	0.507	2.2e-06	0.00058
chr1.trna69-AspGTC@51.73C.23_1_12	TIMM17A|10440	0.507	2.2e-06	0.00058
chr13.trna3-GluTTC@1.30.30_1_2	RHOB|388	0.507	2.2e-06	0.00059
chr1.trna111-HisGTG@8.29.22_1_10|Out	FSCN1|6624	0.507	2.2e-06	0.00059
chr5.trna15-ValAAC@1.20.20_1_1	ATP6V0E2|155066	0.507	2.2e-06	0.00059
chr19.trna10-IleTAT@1.20.20_1_5|Out	UBE2M|9040	0.507	2.2e-06	0.00059
chr15.trna7-GlnCTG@11.34.24_1_7|Out	BYSL|705	0.506	2.2e-06	0.00059
chr17.trna16-GlnTTG@16.31.16_2_12|Out	ARF4|378	0.506	2.2e-06	0.00059
chr1.trna68-GlyGCC@1.27.27_2_10|Out	PSMB7|5695	0.506	2.2e-06	0.00059
chr15.trna7-GlnCTG@11.34.24_1_7|Out	KPNB1|3837	0.506	2.2e-06	0.00059
chr1.trna35-GlyGCC@1.30.30_1_5	CCT6A|908	0.506	2.2e-06	0.00059
chr1.trna111-HisGTG@3.30.28_1_9	IDH1|3417	0.506	2.3e-06	0.00059
chr1.trna68-GlyGCC@1.28.28_2_10|Out	ELOVL1|64834	0.506	2.3e-06	0.00059
chr1.trna35-GlyGCC@1.23.23_1_5|Out	PDXP|57026	0.506	2.3e-06	0.00059
chr6.trna110-AlaTGC@1.19.19_5_13	C9orf84|158401	0.506	2.3e-06	0.00059
chr1.trna111-HisGTG@5.30.26_1_10|Out	KPNA2|3838	0.506	2.3e-06	0.00059
chr1.trna116-GluCTC@1.28.28_1_8|Out	FDPS|2224	0.506	2.3e-06	0.00059
chr17.trna19-ArgTCG@1.19.19_1_1	TIMM50|92609	0.506	2.3e-06	0.00059
chr15.trna7-GlnCTG@11.34.24_1_7|Out	NOL10|79954	0.506	2.3e-06	0.00059
chr16.trna11-ProAGG@1.25.25_3_19|Out	ELOVL1|64834	0.506	2.3e-06	0.0006
chr13.trna3-GluTTC@1.30.30_1_2	MRPL4|51073	0.506	2.3e-06	0.0006
chr6.trna16-TyrGTA@1.25.25_1_3|Out	LYRM2|57226	0.506	2.3e-06	0.0006
chr1.trna68-GlyGCC@1.29.29_2_10|Out	NVL|4931	0.506	2.3e-06	0.0006
chr17.trna16-GlnTTG@8.30.23_2_13|Out	ZDHHC18|84243	0.506	2.3e-06	0.0006
chr1.trna116-GluCTC@1.28.28_1_8|Out	QSOX2|169714	0.506	2.3e-06	0.0006
chr1.trna68-GlyGCC@1.29.29_2_10|Out	WDR12|55759	0.506	2.3e-06	0.0006
chr17.trna18-ArgCCT@1.19.19_1_3	H3F3A|3020	0.506	2.3e-06	0.0006
chr1.trna111-HisGTG@9.31.23_1_10	CHEK2|11200	0.506	2.3e-06	0.0006
chr1.trna35-GlyGCC@1.30.30_1_5	DPH2|1802	0.506	2.3e-06	0.0006
chr1.trna35-GlyGCC@1.30.30_1_5	ARL4A|10124	0.506	2.3e-06	0.0006
chr1.trna116-GluCTC@52.75CCA.24_3_13	DBF4|10926	0.506	2.3e-06	0.0006
chr17.trna16-GlnTTG@11.33.23_2_12|Out	CEBPZ|10153	0.506	2.3e-06	0.0006
chr17.trna19-ArgTCG@1.19.19_1_1	NDUFA8|4702	0.506	2.3e-06	0.0006
chr1.trna32-MetCAT@34.56.23_1_8	NOC2L|26155	0.506	2.3e-06	0.0006
chr1.trna111-HisGTG@11.34.24_1_9	NAT14|57106	0.506	2.3e-06	0.0006
chr1.trna35-GlyGCC@1.29.29_1_5	BYSL|705	0.506	2.3e-06	0.0006
chr14.trna7-ArgACG@1.19.19_1_7|Out	NFKBIB|4793	0.506	2.3e-06	0.0006
chr14.trna18-TyrGTA@1.23.23_1_8|Out	PANK3|79646	0.506	2.3e-06	0.0006
chr13.trna3-GluTTC@1.23.23_1_2	FAM82A2|55177	0.506	2.3e-06	0.0006
chr13.trna3-GluTTC@1.23.23_1_2	ASB7|140460	0.506	2.3e-06	0.0006
chr6.trna110-AlaTGC@1.19.19_5_13	EPB41L1|2036	0.506	2.3e-06	0.0006
chr1.trna99-ValCAC@1.30.30_2_2	ISG20|3669	0.506	2.3e-06	0.0006
chr1.trna111-HisGTG@35.56.22_1_10	ARF3|377	0.506	2.3e-06	0.0006
chr14.trna7-ArgACG@1.19.19_1_7|Out	PSMG4|389362	0.506	2.3e-06	0.0006
chr1.trna35-GlyGCC@1.29.29_1_5	POLR2D|5433	0.506	2.3e-06	0.00061
chr1.trna116-GluCTC@1.28.28_1_8|Out	FARSB|10056	0.506	2.3e-06	0.00061
chr17.trna18-ArgCCT@1.19.19_1_3	SEC61B|10952	0.506	2.3e-06	0.00061
chr1.trna35-GlyGCC@1.28.28_1_5	LDLR|3949	0.506	2.3e-06	0.00061
chr1.trna111-HisGTG@9.31.23_1_10	BACE1|23621	0.506	2.3e-06	0.00061
chr6.trna10-AlaCGC@1.23.23_3_8	ACLY|47	0.506	2.3e-06	0.00061
chr7.trna5-CysGCA@10.33.24_1_7|Out	FARSB|10056	0.506	2.3e-06	0.00061
chr1.trna35-GlyGCC@1.22.22_1_5|Out	SNX6|58533	0.505	2.4e-06	0.00061
chr17.trna42-LeuTAG@1.20.20_2_9	POR|5447	0.505	2.4e-06	0.00061
chr16.trna11-ProAGG@1.30.30_3_18|Out	SLC26A6|65010	0.505	2.4e-06	0.00061
chr1.trna35-GlyGCC@1.29.29_1_5	TSPAN17|26262	0.505	2.4e-06	0.00061
chr1.trna111-HisGTG@9.32.24_1_9	EPT1|85465	0.505	2.4e-06	0.00061
chr1.trna35-GlyGCC@1.22.22_1_5|Out	PPP2R5C|5527	0.505	2.4e-06	0.00061
chr1.trna111-HisGTG@-1T.22.23_1_9	C14orf139|79686	0.505	2.4e-06	0.00061
chr15.trna7-GlnCTG@11.34.24_1_7|Out	EIF4E2|9470	0.505	2.4e-06	0.00061
chr6.trna10-AlaCGC@1.22.22_3_8	HNRNPM|4670	0.505	2.4e-06	0.00061
chr1.trna68-GlyGCC@1.28.28_2_10|Out	TOMM5|401505	0.505	2.4e-06	0.00061
chr1.trna116-GluCTC@1.28.28_1_8|Out	CYP51A1|1595	0.505	2.4e-06	0.00061
chr17.trna4-ArgTCT@1.19.19_1_4|Out	DDA1|79016	0.505	2.4e-06	0.00061
chr1.trna111-HisGTG@9.31.23_1_10	LIPA|3988	0.505	2.4e-06	0.00061
chr1.trna68-GlyGCC@1.29.29_2_10|Out	AAGAB|79719	0.505	2.4e-06	0.00061
chr17.trna16-GlnTTG@37.58.22_2_10	PQLC2|54896	0.505	2.4e-06	0.00061
chr17.trna18-ArgCCT@35.54.20_1_5	CST5|1473	0.505	2.4e-06	0.00061
chr1.trna111-HisGTG@16.33.18_1_9	TIMM17A|10440	0.505	2.4e-06	0.00061
chr1.trna35-GlyGCC@1.29.29_1_5	PDXP|57026	0.505	2.4e-06	0.00062
chr1.trna68-GlyGCC@1.28.28_2_10|Out	GLO1|2739	0.505	2.4e-06	0.00062
chr1.trna117-GlyTCC@1.30.30_1_6|Out	SLC26A6|65010	0.505	2.4e-06	0.00062
chr1.trna35-GlyGCC@1.23.23_1_5|Out	JKAMP|51528	0.505	2.4e-06	0.00062
chr17.trna23-ArgCCG@1.19.19_1_1|Out	PSENEN|55851	0.505	2.4e-06	0.00062
chr1.trna68-GlyGCC@1.29.29_2_10|Out	NIPA2|81614	0.505	2.4e-06	0.00062
chr1.trna34-LeuCAG@1.25.25_1_9|Out	IL1R1|3554	0.505	2.4e-06	0.00062
chr1.trna47-AsnGTT@36.58.23_1_10	SLC41A3|54946	0.505	2.4e-06	0.00062
chr15.trna7-GlnCTG@29.53.25_1_11	KPNA2|3838	0.505	2.4e-06	0.00062
chr17.trna18-ArgCCT@35.54.20_1_5	HAUS2|55142	0.505	2.4e-06	0.00062
chr17.trna4-ArgTCT@1.19.19_1_4|Out	PSENEN|55851	0.505	2.4e-06	0.00062
chr15.trna7-GlnCTG@11.34.24_1_7|Out	NUS1|116150	0.505	2.4e-06	0.00062
chr14.trna7-ArgACG@1.19.19_1_7|Out	PRELID1|27166	0.505	2.4e-06	0.00062
chr1.trna68-GlyGCC@3.27.25_2_10|Out	HSDL2|84263	0.505	2.4e-06	0.00062
chr1.trna68-GlyGCC@1.29.29_2_10|Out	IMMT|10989	0.505	2.4e-06	0.00062
chr15.trna4-ArgTCG@1.19.19_2_4	PRELID1|27166	0.505	2.4e-06	0.00062
chr1.trna111-HisGTG@9.29.21_1_10|Out	LRWD1|222229	0.505	2.4e-06	0.00062
chr17.trna19-ArgTCG@1.19.19_1_1	TMEM208|29100	0.505	2.4e-06	0.00062
chr1.trna116-GluCTC@1.29.29_1_8|Out	UBE2M|9040	0.505	2.4e-06	0.00062
chr1.trna116-GluCTC@1.29.29_1_8|Out	MED8|112950	0.505	2.4e-06	0.00062
chr1.trna116-GluCTC@52.75CCA.24_3_13	ISG20|3669	0.505	2.4e-06	0.00062
chr1.trna35-GlyGCC@1.23.23_1_5|Out	LDOC1L|84247	0.505	2.4e-06	0.00062
chr1.trna111-HisGTG@9.29.21_1_10|Out	LOC90784|90784	0.505	2.4e-06	0.00062
chr1.trna111-HisGTG@5.30.26_1_10|Out	TOR2A|27433	0.505	2.4e-06	0.00063
chr6.trna10-AlaCGC@1.19.19_3_8	FDFT1|2222	0.505	2.5e-06	0.00063
chr14.trna18-TyrGTA@1.23.23_1_8|Out	ZNF616|90317	0.505	2.5e-06	0.00063
chr1.trna111-HisGTG@9.31.23_1_10	AIMP2|7965	0.505	2.5e-06	0.00063
chr1.trna35-GlyGCC@1.30.30_1_5	GART|2618	0.505	2.5e-06	0.00063
chr1.trna111-HisGTG@9.31.23_1_10	CPN2|1370	0.505	2.5e-06	0.00063
chr1.trna111-HisGTG@5.30.26_1_10|Out	RNF216L|441191	0.505	2.5e-06	0.00063
chr1.trna111-HisGTG@35.56.22_1_10	SRRM3|222183	0.505	2.5e-06	0.00063
chr14.trna7-ArgACG@1.19.19_1_7|Out	PFDN2|5202	0.505	2.5e-06	0.00063
chr1.trna111-HisGTG@9.33.25_1_9	CYP51A1|1595	0.505	2.5e-06	0.00063
chr1.trna111-HisGTG@16.33.18_1_9	FBXL18|80028	0.505	2.5e-06	0.00063
chr1.trna34-LeuCAG@1.25.25_1_9|Out	MXRA5|25878	0.505	2.5e-06	0.00063
chr6.trna110-AlaTGC@1.24.24_5_13	SLC31A1|1317	0.505	2.5e-06	0.00063
chr15.trna7-GlnCTG@11.34.24_1_7|Out	DAD1|1603	0.505	2.5e-06	0.00063
chr1.trna111-HisGTG@35.56.22_1_10	RAB5B|5869	0.505	2.5e-06	0.00063
chr15.trna7-GlnCTG@20.42.23_1_6	CLU|1191	0.505	2.5e-06	0.00063
chr15.trna4-ArgTCG@1.19.19_2_4	EIF5AL1|143244	0.505	2.5e-06	0.00063
chr1.trna68-GlyGCC@1.29.29_2_10|Out	FBXL18|80028	0.504	2.5e-06	0.00063
chr1.trna111-HisGTG@8.30.23_1_10|Out	KPNA2|3838	0.504	2.5e-06	0.00063
chr1.trna117-GlyTCC@1.23.23_1_7|Out	SHB|6461	0.504	2.5e-06	0.00063
chr1.trna68-GlyGCC@1.29.29_2_10|Out	RNF216L|441191	0.504	2.5e-06	0.00063
chr1.trna68-GlyGCC@1.27.27_2_10|Out	MTRF1L|54516	0.504	2.5e-06	0.00063
chr1.trna68-GlyGCC@1.29.29_2_10|Out	LOC729082|729082	0.504	2.5e-06	0.00063
chr1.trna68-GlyGCC@1.29.29_2_10|Out	HMGCS1|3157	0.504	2.5e-06	0.00063
chr6.trna10-AlaCGC@1.23.23_3_8	AAGAB|79719	0.504	2.5e-06	0.00063
chr14.trna18-TyrGTA@1.23.23_1_8|Out	STX2|2054	0.504	2.5e-06	0.00063
chr1.trna35-GlyGCC@12.32.21_4_18|Out	MRPL4|51073	0.504	2.5e-06	0.00063
chr6.trna10-AlaCGC@1.19.19_3_8	PDE6D|5147	0.504	2.5e-06	0.00064
chr1.trna111-HisGTG@35.56.22_1_10	USP5|8078	0.504	2.5e-06	0.00064
chr1.trna54-LysTTT@1.30.30_1_6	ELOVL1|64834	0.504	2.5e-06	0.00064
chr17.trna18-ArgCCT@1.19.19_1_3	NME1|4830	0.504	2.5e-06	0.00064
chr1.trna35-GlyGCC@1.28.28_1_5	DPH2|1802	0.504	2.5e-06	0.00064
chr1.trna35-GlyGCC@3.30.28_1_5	CCT6A|908	0.504	2.5e-06	0.00064
chr1.trna68-GlyGCC@1.27.27_2_10|Out	PDE6D|5147	0.504	2.5e-06	0.00064
chr1.trna116-GluCTC@1.29.29_1_8|Out	SLC16A1|6566	0.504	2.5e-06	0.00064
chr17.trna42-LeuTAG@68.85CCA.18_2_11	SLC27A4|10999	0.504	2.5e-06	0.00064
chr17.trna16-GlnTTG@15.33.19_2_12|Out	CCT6A|908	0.504	2.5e-06	0.00064
chr1.trna116-GluCTC@1.26.26_1_8|Out	ERO1L|30001	0.504	2.5e-06	0.00064
chr1.trna34-LeuCAG@70.86CCA.17_1_7|Out	GABARAPL1|23710	0.504	2.5e-06	0.00064
chr1.trna111-HisGTG@16.33.18_1_9	TYRO3|7301	0.504	2.5e-06	0.00064
[truncated: 286,602+ more rows]
