# Supplementary material for: tRNA Fragments Show Intertwining with mRNAs of Specific Repeat Content and Have Links to Disparities
Source: Oxford University Press journal article supplement (doi:10.1158/0008-5472.can-19-0789), 2019-04-17
Supplement: 00085472can190789-sup-218537_1_supp_5440137_pp9clw.xlsx [file 00085472can190789-sup-218537_1_supp_5440137_pp9clw.xlsx]

## Sheet: S8
Supplemental Table S8: DAVID analysis on the mRNAs of the mitochondrial tRF--mRNA correlations
Note: DAVID was run on the gene sets of the mRNAs that were positively (Sections: Positive Correlations) or negatively (Sections: Negative Correlations) correlated with mitochondrial tRNA fragments.
Category	Term	Count	%	Pvalue	Genes	List Total	Pop Hits	Pop Total	Fold Enrichment	Bonferroni	Benjamini	FDR
Cancer Type:	ACC
Positive Correlations
GOTERM_BP_FAT	GO:0045333~cellular respiration	53	4.99529	4.6507e-16	2647, 1350, 4698, 4697, 10891, 5160, 8013, 374291, 2109, 6392, 4967, 65018, 1349, 1345, 1340, 6648, 201163, 1327, 7381, 80219, 4695, 4696, 93058, 1337, 4694, 7385, 9016, 7384, 54539, 3420, 4707, 4704, 4701, 4702, 27089, 3417, 55526, 57017, 10514, 4716, 6622, 4717, 4729, 4724, 4713, 4714, 4710, 7915, 6389, 8802, 8801, 3421, 50	944	148	9027	3.42441	3.01981e-12	3.01981e-12	8.77076e-13
KEGG_PATHWAY	hsa00190:Oxidative phosphorylation	45	4.24128	2.63659e-15	54539, 1350, 9550, 4698, 4707, 4697, 155066, 4704, 4701, 4702, 9551, 27089, 51606, 374291, 6392, 533, 1349, 1346, 1345, 10063, 1340, 4716, 4717, 10312, 4729, 4724, 4713, 1327, 4714, 9296, 4710, 521, 7381, 523, 6389, 10476, 4695, 4696, 1337, 4694, 526, 528, 7385, 7384, 527	473	105	3968	3.59529	7.30083e-13	7.30083e-13	3.5083e-12
GOTERM_BP_FAT	GO:0022904~respiratory electron transport chain	38	3.58153	4.25071e-14	54539, 1350, 4698, 4707, 10891, 4697, 4704, 4701, 4702, 27089, 374291, 2109, 6392, 65018, 1349, 1345, 57017, 10514, 1340, 6622, 4716, 6648, 4717, 4729, 4724, 4713, 1327, 4714, 4710, 7915, 7381, 6389, 4695, 4696, 1337, 4694, 7385, 7384	944	91	9027	3.99313	2.89146e-10	1.44573e-10	8.35443e-11
GOTERM_BP_FAT	GO:0015980~energy derivation by oxidation of organic compounds	62	5.84354	5.03833e-14	2647, 1350, 5167, 4698, 10891, 4697, 5160, 37, 8013, 374291, 2109, 4967, 6392, 65018, 1349, 112464, 1345, 1340, 6648, 201163, 1327, 7381, 5834, 80219, 4695, 4696, 93058, 1337, 4694, 5509, 7385, 7384, 9016, 54539, 3420, 4707, 5255, 4704, 4701, 4702, 27089, 221395, 3417, 55526, 79660, 57017, 10514, 6622, 4716, 4717, 4729, 4724, 4713, 4714, 2778, 4710, 7915, 6389, 8802, 8801, 3421, 50	944	212	9027	2.79658	3.42748e-10	1.14249e-10	9.90208e-11
GOTERM_BP_FAT	GO:0022900~electron transport chain	38	3.58153	6.40391e-14	54539, 1350, 4698, 4707, 10891, 4697, 4704, 4701, 4702, 27089, 374291, 2109, 6392, 65018, 1349, 1345, 57017, 10514, 1340, 6622, 4716, 6648, 4717, 4729, 4724, 4713, 1327, 4714, 4710, 7915, 7381, 6389, 4695, 4696, 1337, 4694, 7385, 7384	944	92	9027	3.94973	4.35607e-10	1.08902e-10	1.25855e-10
GOTERM_CC_FAT	GO:0044429~mitochondrial part	152	14.3261	6.31024e-13	2647, 6770, 686, 5164, 4698, 26164, 4697, 84274, 5160, 35, 83875, 9551, 37, 2744, 38, 374291, 23305, 26073, 90624, 1327, 80221, 5366, 1593, 4891, 10628, 23479, 9868, 4830, 10476, 80219, 4695, 4696, 80179, 80724, 4694, 345778, 54539, 51025, 3420, 10229, 3313, 18, 8760, 54534, 217, 373156, 3028, 27089, 55217, 55526, 51300, 51110, 132671, 2639, 10493, 51117, 7915, 521, 125170, 29093, 6389, 25915, 79…	907	802	8395	1.75421	5.31976e-10	5.31976e-10	9.75331e-10
GOTERM_BP_FAT	GO:0042775~mitochondrial ATP synthesis coupled electron transport	33	3.11027	7.16578e-13	54539, 1350, 4698, 4707, 4697, 4704, 4701, 4702, 27089, 374291, 6392, 65018, 1349, 1345, 57017, 1340, 6622, 4716, 4717, 4729, 4724, 4713, 1327, 4714, 4710, 7381, 6389, 4695, 4696, 1337, 4694, 7385, 7384	944	76	9027	4.15214	4.87246e-09	9.74492e-10	1.40774e-09
GOTERM_CC_FAT	GO:0005739~mitochondrion	223	21.0179	8.93519e-13	6770, 84277, 10891, 84274, 35, 55848, 37, 38, 374291, 22906, 90624, 1327, 80221, 54995, 5366, 1593, 4891, 10628, 9868, 10476, 84896, 80219, 2021, 80724, 345778, 1819, 823, 10229, 215, 18, 8760, 217, 55217, 27089, 114294, 55526, 10312, 132671, 10493, 521, 7052, 523, 6389, 25915, 91647, 11222, 10245, 440957, 2109, 4967, 6392, 57380, 65018, 84869, 10440, 708, 10063, 64981, 5601, 92259, 10059, 64432,…	907	1337	8395	1.54379	7.53227e-10	3.76613e-10	1.38097e-09
GOTERM_BP_FAT	GO:0042773~ATP synthesis coupled electron transport	33	3.11027	1.10583e-12	54539, 1350, 4698, 4707, 4697, 4704, 4701, 4702, 27089, 374291, 6392, 65018, 1349, 1345, 57017, 1340, 6622, 4716, 4717, 4729, 4724, 4713, 1327, 4714, 4710, 7381, 6389, 4695, 4696, 1337, 4694, 7385, 7384	944	77	9027	4.09821	7.51932e-09	1.25322e-09	2.17247e-09
GOTERM_BP_FAT	GO:0055114~oxidation-reduction process	129	12.1583	1.30933e-12	2647, 7291, 5167, 4698, 4697, 10891, 7295, 5160, 35, 1577, 83875, 79689, 51171, 1576, 37, 38, 8013, 374291, 112464, 25979, 2157, 1327, 79912, 1593, 734, 10005, 5834, 11001, 80219, 4695, 4696, 4694, 80724, 219743, 54539, 3420, 215, 10229, 5255, 26063, 217, 10327, 55163, 3028, 373156, 55217, 27089, 221395, 3417, 55526, 221, 10514, 226, 2639, 10493, 2778, 7915, 79966, 6389, 10495, 1632, 3421, 192286…	944	666	9027	1.8522	8.90314e-09	1.27188e-09	2.57229e-09
GOTERM_BP_FAT	GO:0006091~generation of precursor metabolites and energy	70	6.59755	5.76772e-12	2647, 1350, 5167, 4698, 10891, 4697, 5160, 37, 8013, 374291, 2109, 4967, 6392, 65018, 1349, 538, 112464, 1346, 1345, 10063, 1340, 6648, 201163, 1327, 7381, 5834, 80219, 4695, 4696, 93058, 10007, 1337, 4694, 5509, 7385, 7384, 9016, 54539, 669, 3420, 4707, 5255, 4704, 4701, 4702, 27089, 221395, 5208, 3417, 55526, 79660, 57017, 10514, 6622, 4716, 4717, 226, 4729, 4724, 4713, 4714, 2778, 5467, 4710, …	944	282	9027	2.37367	3.92205e-08	4.90256e-09	1.13315e-08
GOTERM_CC_FAT	GO:0098803~respiratory chain complex	29	2.73327	3.42685e-11	54539, 1350, 4698, 4707, 4697, 4704, 4701, 4702, 27089, 374291, 6392, 1349, 6622, 4716, 4717, 4729, 4724, 4713, 1327, 4714, 4710, 7381, 6389, 4695, 4696, 1337, 4694, 7385, 7384	907	66	8395	4.06694	2.88884e-08	9.62947e-09	5.29642e-08
GOTERM_CC_FAT	GO:0070469~respiratory chain	31	2.92177	8.91804e-11	54539, 1350, 4698, 4707, 4697, 4704, 4701, 4702, 27089, 374291, 6392, 1349, 1346, 6622, 4716, 4717, 4729, 4724, 4713, 1327, 4714, 4710, 7381, 6389, 4695, 4696, 1337, 4694, 192286, 7385, 7384	907	77	8395	3.72636	7.51791e-08	1.87948e-08	1.37834e-07
GOTERM_CC_FAT	GO:0005743~mitochondrial inner membrane	88	8.29406	1.04324e-10	6770, 1350, 23203, 4698, 90580, 4697, 26164, 11222, 10245, 84274, 9551, 37, 38, 374291, 6392, 57380, 3052, 65018, 1349, 1346, 10440, 1345, 64981, 1340, 92259, 6648, 64432, 10058, 2806, 1327, 60488, 64975, 1593, 51264, 7381, 64976, 10476, 80219, 4695, 54968, 4696, 93058, 1337, 4358, 4694, 7385, 7384, 9016, 54539, 51025, 4707, 10229, 4704, 8760, 54534, 4701, 4702, 373156, 27089, 197257, 54977, 5130…	907	405	8395	2.01113	8.79448e-08	1.7589e-08	1.61238e-07
GOTERM_CC_FAT	GO:0005746~mitochondrial respiratory chain	30	2.82752	1.05457e-10	54539, 1350, 4698, 4707, 4697, 4704, 4701, 4702, 27089, 374291, 6392, 1349, 1346, 6622, 4716, 4717, 4729, 4724, 4713, 1327, 4714, 4710, 7381, 6389, 4695, 4696, 1337, 4694, 7385, 7384	907	73	8395	3.80375	8.89005e-08	1.48168e-08	1.62991e-07
GOTERM_BP_FAT	GO:0006119~oxidative phosphorylation	33	3.11027	1.07427e-10	54539, 1350, 4698, 4707, 4697, 4704, 4701, 4702, 27089, 374291, 6392, 65018, 1349, 1345, 57017, 1340, 6622, 4716, 4717, 4729, 4724, 4713, 1327, 4714, 4710, 7381, 6389, 4695, 4696, 1337, 4694, 7385, 7384	944	89	9027	3.54565	7.30505e-07	8.11673e-08	2.11057e-07
GOTERM_CC_FAT	GO:0044455~mitochondrial membrane part	48	4.52403	3.67632e-10	6770, 54539, 51025, 1350, 4707, 10229, 4698, 90580, 4697, 84274, 10245, 4704, 4701, 4702, 9551, 27089, 374291, 6392, 65018, 1349, 1346, 10440, 65991, 6622, 4716, 4717, 4729, 10058, 4724, 4713, 1327, 4714, 4710, 521, 7381, 9868, 6389, 79135, 10476, 120892, 4695, 54968, 4696, 1337, 4694, 4067, 7385, 7384	907	168	8395	2.64451	3.09914e-07	4.42734e-08	5.68198e-07
GOTERM_CC_FAT	GO:1990204~oxidoreductase complex	32	3.01602	4.35406e-10	54539, 4698, 5164, 4707, 4697, 5160, 4704, 4701, 4702, 27089, 374291, 4967, 6392, 55526, 84869, 92259, 6622, 4716, 4717, 4729, 4724, 4713, 4714, 4710, 7381, 6389, 4695, 4696, 4694, 1536, 7385, 7384	907	86	8395	3.44401	3.67047e-07	4.58809e-08	6.72946e-07
GOTERM_CC_FAT	GO:0098798~mitochondrial protein complex	43	4.05278	4.93111e-10	54539, 51025, 1350, 5164, 4698, 90580, 4707, 4697, 10245, 4704, 4701, 4702, 9551, 27089, 374291, 2109, 6392, 65018, 10440, 92259, 6622, 4716, 4717, 4729, 4724, 4713, 1327, 4714, 4710, 6832, 521, 7381, 9868, 6389, 79135, 10476, 8801, 4695, 4696, 1337, 4694, 7385, 7384	907	142	8395	2.80281	4.15693e-07	4.61881e-08	7.62133e-07
GOTERM_BP_FAT	GO:1901657~glycosyl compound metabolic process	71	6.6918	6.82851e-10	22875, 1350, 5167, 4698, 10891, 4354, 4697, 9551, 38, 374291, 4967, 6392, 65018, 1349, 538, 84869, 1345, 79717, 1340, 10059, 201163, 139596, 1327, 272, 7381, 10476, 4830, 81890, 4695, 283927, 4696, 1337, 4694, 7385, 7384, 54539, 669, 1741, 132, 4707, 4704, 4701, 4702, 27089, 1806, 5208, 55526, 7084, 57017, 6622, 4716, 4717, 10312, 226, 4729, 4724, 4713, 4714, 6818, 4710, 521, 51071, 523, 23433, 6…	944	318	9027	2.13502	4.64337e-06	4.64338e-07	1.34156e-06
GOTERM_BP_FAT	GO:0009141~nucleoside triphosphate metabolic process	56	5.27804	7.62479e-10	1350, 5167, 4698, 10891, 4697, 9551, 374291, 4967, 6392, 65018, 538, 1349, 1345, 1340, 201163, 1327, 272, 7381, 10476, 4830, 4695, 4696, 1337, 4694, 7385, 7384, 54539, 669, 132, 4707, 4704, 4701, 4702, 27089, 5208, 55526, 57017, 6622, 4716, 10312, 4717, 226, 4729, 4724, 4713, 4714, 4710, 521, 523, 23433, 6389, 8802, 120892, 4338, 526, 83549	944	224	9027	2.39062	5.18485e-06	4.71351e-07	1.498e-06
GOTERM_BP_FAT	GO:0009116~nucleoside metabolic process	69	6.5033	7.90409e-10	22875, 1350, 5167, 4698, 10891, 4354, 4697, 9551, 38, 374291, 4967, 6392, 65018, 1349, 538, 1345, 79717, 1340, 10059, 201163, 139596, 1327, 272, 7381, 10476, 4830, 81890, 4695, 283927, 4696, 1337, 4694, 7385, 7384, 54539, 669, 1741, 132, 4707, 4704, 4701, 4702, 27089, 1806, 5208, 55526, 7084, 57017, 6622, 4716, 4717, 10312, 226, 4729, 4724, 4713, 4714, 6818, 4710, 521, 51071, 523, 23433, 6389, 12…	944	306	9027	2.15625	5.37477e-06	4.47898e-07	1.55287e-06
GOTERM_BP_FAT	GO:0009199~ribonucleoside triphosphate metabolic process	53	4.99529	1.13029e-09	1350, 4698, 4697, 10891, 9551, 374291, 4967, 6392, 65018, 538, 1349, 1345, 1340, 201163, 1327, 272, 7381, 10476, 4830, 4695, 4696, 1337, 4694, 7385, 7384, 54539, 669, 4707, 4704, 4701, 4702, 27089, 5208, 55526, 57017, 4716, 6622, 10312, 4717, 226, 4729, 4724, 4713, 4714, 4710, 521, 6389, 523, 23433, 120892, 4338, 83549, 526	944	208	9027	2.4366	7.68597e-06	5.91231e-07	2.22063e-06
GOTERM_CC_FAT	GO:0098800~inner mitochondrial membrane protein complex	36	3.39303	1.23699e-09	54539, 51025, 1350, 4698, 90580, 4707, 4697, 10245, 4704, 4701, 4702, 9551, 27089, 374291, 6392, 10440, 6622, 4716, 4717, 4729, 4724, 4713, 1327, 4714, 4710, 521, 7381, 6389, 79135, 10476, 4695, 4696, 1337, 4694, 7385, 7384	907	109	8395	3.05696	1.04278e-06	1.04278e-07	1.91184e-06
GOTERM_BP_FAT	GO:0009144~purine nucleoside triphosphate metabolic process	53	4.99529	1.35688e-09	1350, 4698, 4697, 10891, 9551, 374291, 4967, 6392, 65018, 538, 1349, 1345, 1340, 201163, 1327, 272, 7381, 10476, 4830, 4695, 4696, 1337, 4694, 7385, 7384, 54539, 669, 132, 4707, 4704, 4701, 4702, 27089, 5208, 55526, 57017, 4716, 6622, 10312, 4717, 226, 4729, 4724, 4713, 4714, 4710, 521, 6389, 523, 23433, 120892, 4338, 526	944	209	9027	2.42494	9.22675e-06	6.59057e-07	2.66579e-06
GOTERM_BP_FAT	GO:0009205~purine ribonucleoside triphosphate metabolic process	52	4.90104	1.36301e-09	1350, 4698, 4697, 10891, 9551, 374291, 6392, 4967, 65018, 538, 1349, 1345, 1340, 201163, 1327, 272, 7381, 10476, 4830, 4695, 4696, 1337, 4694, 7385, 7384, 54539, 669, 4707, 4704, 4701, 4702, 27089, 5208, 55526, 57017, 4716, 6622, 10312, 4717, 226, 4729, 4724, 4713, 4714, 4710, 521, 6389, 523, 23433, 120892, 4338, 526	944	203	9027	2.44951	9.2684e-06	6.17896e-07	2.67783e-06
GOTERM_BP_FAT	GO:0009119~ribonucleoside metabolic process	65	6.1263	1.37989e-09	22875, 1350, 5167, 4698, 10891, 4354, 4697, 9551, 38, 374291, 4967, 6392, 65018, 1349, 538, 1345, 79717, 1340, 201163, 139596, 1327, 272, 7381, 10476, 4830, 81890, 4695, 283927, 4696, 1337, 4694, 7385, 7384, 54539, 669, 1741, 132, 4707, 4704, 4701, 4702, 27089, 5208, 55526, 57017, 6622, 4716, 4717, 10312, 226, 4729, 4724, 4713, 4714, 6818, 4710, 521, 523, 23433, 6389, 120892, 4338, 526, 83549, 84…	944	284	9027	2.1886	9.38322e-06	5.86454e-07	2.711e-06
GOTERM_CC_FAT	GO:0031966~mitochondrial membrane	107	10.0848	1.91885e-09	6770, 4698, 4697, 26164, 84274, 9551, 37, 38, 374291, 23305, 1327, 5366, 1593, 4891, 9868, 10476, 4830, 80219, 4695, 4696, 4694, 80179, 345778, 54539, 51025, 10229, 8760, 54534, 373156, 27089, 51300, 132671, 51117, 10493, 521, 29093, 125170, 6389, 79135, 25915, 1632, 192286, 2182, 1350, 23203, 90580, 11222, 5578, 10245, 6392, 4967, 57380, 3052, 65018, 1349, 1346, 10440, 1345, 64981, 92259, 1340, …	907	559	8395	1.77168	1.61759e-06	1.47053e-07	2.96569e-06
KEGG_PATHWAY	hsa05323:Rheumatoid arthritis	22	2.07352	2.13158e-09	3113, 3127, 3111, 9550, 3115, 1435, 10312, 155066, 8741, 9296, 51606, 6387, 6352, 523, 7099, 3689, 533, 526, 528, 3123, 3122, 527	473	43	3968	4.29205	5.84053e-07	2.92026e-07	2.80903e-06
GOTERM_BP_FAT	GO:0046128~purine ribonucleoside metabolic process	62	5.84354	2.25415e-09	22875, 1350, 5167, 4698, 10891, 4354, 4697, 9551, 38, 374291, 4967, 6392, 65018, 538, 1349, 1345, 79717, 1340, 201163, 1327, 272, 7381, 10476, 4830, 4695, 283927, 4696, 1337, 4694, 7385, 7384, 54539, 669, 1741, 132, 4707, 4704, 4701, 4702, 27089, 5208, 55526, 57017, 6622, 4716, 4717, 10312, 226, 4729, 4724, 4713, 4714, 6818, 4710, 521, 523, 23433, 6389, 120892, 4338, 526, 84836	944	268	9027	2.21222	1.53281e-05	9.0166e-07	4.42861e-06
GOTERM_CC_FAT	GO:0019866~organelle inner membrane	90	8.48256	2.59385e-09	6770, 1350, 23203, 4698, 90580, 4697, 26164, 11222, 10245, 84274, 9551, 37, 38, 374291, 6392, 57380, 3052, 65018, 1349, 1346, 10440, 1345, 64981, 1340, 92259, 6648, 64432, 10058, 2806, 1327, 60488, 64975, 1593, 283417, 51264, 7381, 64976, 10476, 80219, 4695, 144404, 54968, 4696, 93058, 1337, 4358, 4694, 7385, 7384, 9016, 54539, 51025, 4707, 10229, 4704, 8760, 54534, 4701, 4702, 373156, 27089, 197…	907	444	8395	1.87617	2.18662e-06	1.82218e-07	4.00896e-06
GOTERM_BP_FAT	GO:0042278~purine nucleoside metabolic process	62	5.84354	3.06326e-09	22875, 1350, 5167, 4698, 10891, 4354, 4697, 9551, 38, 374291, 4967, 6392, 65018, 538, 1349, 1345, 79717, 1340, 201163, 1327, 272, 7381, 10476, 4830, 4695, 283927, 4696, 1337, 4694, 7385, 7384, 54539, 669, 1741, 132, 4707, 4704, 4701, 4702, 27089, 5208, 55526, 57017, 6622, 4716, 4717, 10312, 226, 4729, 4724, 4713, 4714, 6818, 4710, 521, 523, 23433, 6389, 120892, 4338, 526, 84836	944	270	9027	2.19583	2.08299e-05	1.15723e-06	6.01821e-06
GOTERM_CC_FAT	GO:0005740~mitochondrial envelope	111	10.4618	3.42653e-09	2647, 6770, 4698, 4697, 26164, 84274, 9551, 37, 38, 374291, 23305, 1327, 5366, 1593, 4891, 10628, 9868, 4830, 10476, 80219, 4695, 4696, 4694, 80179, 345778, 54539, 51025, 10229, 8760, 54534, 373156, 27089, 51300, 132671, 51117, 10493, 521, 29093, 125170, 6389, 79135, 25915, 1632, 192286, 2182, 1350, 23203, 90580, 11222, 5578, 10245, 6821, 6392, 4967, 57380, 3052, 65018, 1349, 1346, 10440, 1345, 1…	907	593	8395	1.73253	2.88856e-06	2.22198e-07	5.29591e-06
KEGG_PATHWAY	hsa04145:Phagosome	36	3.39303	3.89656e-09	3127, 3111, 9550, 11151, 10952, 155066, 51606, 10383, 533, 3920, 5868, 3134, 3133, 3105, 4360, 3113, 3115, 10312, 9296, 7879, 929, 718, 523, 7099, 3689, 84617, 8411, 2212, 526, 1536, 2214, 528, 83547, 3123, 3122, 527	473	105	3968	2.87623	1.06766e-06	3.55885e-07	5.13495e-06
GOTERM_BP_FAT	GO:0046034~ATP metabolic process	48	4.52403	4.13433e-09	54539, 669, 1350, 4698, 4707, 10891, 4697, 4704, 4701, 4702, 9551, 27089, 374291, 4967, 6392, 5208, 65018, 538, 55526, 1349, 1345, 57017, 1340, 6622, 4716, 4717, 10312, 226, 201163, 4729, 4724, 4713, 1327, 4714, 272, 4710, 521, 7381, 523, 6389, 10476, 4695, 4696, 1337, 4694, 526, 7385, 7384	944	185	9027	2.48108	2.81131e-05	1.47966e-06	8.12251e-06
GOTERM_BP_FAT	GO:0006120~mitochondrial electron transport, NADH to ubiquinone	21	1.97926	4.88329e-09	54539, 4698, 4707, 4716, 6622, 4697, 4717, 4729, 4724, 4704, 4713, 4701, 4714, 4702, 4710, 374291, 4695, 65018, 4696, 4694, 57017	944	45	9027	4.4625	3.32058e-05	1.66032e-06	9.59394e-06
KEGG_PATHWAY	hsa05012:Parkinson's disease	36	3.39303	1.55172e-08	54539, 1350, 4698, 4707, 4697, 9627, 4704, 4701, 4702, 27089, 374291, 6392, 65018, 1349, 1346, 1345, 1340, 6622, 4716, 4717, 4729, 4724, 4713, 1327, 4714, 4710, 7381, 6389, 10476, 120892, 4695, 4696, 1337, 4694, 7385, 7384	473	110	3968	2.74549	4.2517e-06	1.06293e-06	2.04488e-05
GOTERM_BP_FAT	GO:0009161~ribonucleoside monophosphate metabolic process	53	4.99529	1.75606e-08	1350, 4698, 4354, 4697, 10891, 9551, 374291, 4967, 6392, 65018, 538, 1349, 1345, 1340, 201163, 139596, 1327, 272, 7381, 10476, 4695, 4696, 1337, 4694, 7385, 7384, 54539, 669, 132, 1741, 4707, 4704, 4701, 4702, 27089, 5208, 55526, 57017, 4716, 6622, 10312, 4717, 226, 4729, 4724, 4713, 4714, 4710, 521, 523, 6389, 83549, 526	944	224	9027	2.26256	0.000119405	5.68626e-06	3.45003e-05
GOTERM_BP_FAT	GO:0009123~nucleoside monophosphate metabolic process	54	5.08954	3.11044e-08	1350, 4698, 10891, 4354, 4697, 9551, 374291, 4967, 6392, 65018, 538, 1349, 1345, 1340, 201163, 139596, 1327, 272, 7381, 10476, 4695, 4696, 1337, 4694, 7385, 7384, 54539, 669, 132, 1741, 4707, 4704, 4701, 4702, 27089, 5208, 55526, 7084, 57017, 4716, 6622, 10312, 4717, 226, 4729, 4724, 4713, 4714, 4710, 521, 523, 6389, 83549, 526	944	234	9027	2.20673	0.000211488	9.61405e-06	6.11092e-05
GOTERM_BP_FAT	GO:0019693~ribose phosphate metabolic process	71	6.6918	3.22442e-08	1350, 5167, 4698, 10891, 4354, 4697, 5578, 9551, 38, 374291, 4967, 6392, 65018, 1349, 538, 1345, 79717, 1340, 4846, 201163, 139596, 1327, 272, 7381, 10476, 4830, 4695, 283927, 4696, 1337, 4694, 7385, 7384, 54539, 669, 1741, 132, 4707, 4704, 4701, 4702, 27089, 3357, 5208, 55526, 57017, 23729, 10411, 6622, 4716, 4717, 10312, 226, 4729, 4724, 4713, 4714, 6818, 2778, 4710, 521, 51071, 523, 23433, 638…	944	347	9027	1.95659	0.000219237	9.53303e-06	6.33485e-05
GOTERM_BP_FAT	GO:0009126~purine nucleoside monophosphate metabolic process	51	4.80679	3.66103e-08	1350, 4698, 4354, 4697, 10891, 9551, 374291, 6392, 4967, 65018, 538, 1349, 1345, 1340, 201163, 1327, 272, 7381, 10476, 4695, 4696, 1337, 4694, 7385, 7384, 54539, 669, 132, 1741, 4707, 4704, 4701, 4702, 27089, 5208, 55526, 57017, 4716, 6622, 10312, 4717, 226, 4729, 4724, 4713, 4714, 4710, 521, 6389, 523, 526	944	216	9027	2.25781	0.000248919	1.03729e-05	7.19263e-05
GOTERM_BP_FAT	GO:0009167~purine ribonucleoside monophosphate metabolic process	51	4.80679	3.66103e-08	1350, 4698, 4354, 4697, 10891, 9551, 374291, 6392, 4967, 65018, 538, 1349, 1345, 1340, 201163, 1327, 272, 7381, 10476, 4695, 4696, 1337, 4694, 7385, 7384, 54539, 669, 132, 1741, 4707, 4704, 4701, 4702, 27089, 5208, 55526, 57017, 4716, 6622, 10312, 4717, 226, 4729, 4724, 4713, 4714, 4710, 521, 6389, 523, 526	944	216	9027	2.25781	0.000248919	1.03729e-05	7.19263e-05
GOTERM_BP_FAT	GO:0015992~proton transport	31	2.92177	4.03623e-08	7291, 1350, 9550, 9368, 4697, 155066, 9551, 27089, 51606, 533, 1349, 1346, 1345, 1340, 10312, 29988, 1327, 9296, 114134, 4891, 521, 7381, 523, 10476, 1337, 526, 285195, 528, 7384, 9016, 527	944	99	9027	2.99432	0.000274426	1.09785e-05	7.92976e-05
GOTERM_CC_FAT	GO:0031988~membrane-bounded vesicle	322	30.3487	4.7504e-08	153364, 10890, 8741, 38, 80210, 80208, 533, 8878, 538, 11320, 3920, 6498, 1829, 2202, 11326, 51368, 79717, 79812, 6780, 100037417, 1327, 50618, 7879, 929, 6609, 9868, 10476, 1984, 7076, 3911, 8411, 2212, 11336, 1495, 2214, 1435, 823, 347735, 829, 84299, 826, 10875, 51596, 214, 27183, 18, 217, 10327, 23011, 21, 175, 23295, 114876, 149951, 23390, 629, 221, 112483, 140885, 3837, 130589, 10312, 226, …	907	2327	8395	1.28078	4.00451e-05	2.86041e-06	7.34202e-05
GOTERM_MF_FAT	GO:0015078~hydrogen ion transmembrane transporter activity	25	2.35627	4.9133e-08	9550, 1350, 1340, 4697, 10312, 155066, 1327, 9296, 51606, 27089, 521, 4891, 7381, 523, 10476, 533, 1349, 1337, 1346, 526, 285195, 1345, 528, 7384, 527	845	71	8342	3.47612	7.3009e-05	7.3009e-05	8.15437e-05
GOTERM_BP_FAT	GO:0006818~hydrogen transport	31	2.92177	5.20132e-08	7291, 1350, 9550, 9368, 4697, 155066, 9551, 27089, 51606, 533, 1349, 1346, 1345, 1340, 10312, 29988, 1327, 9296, 114134, 4891, 521, 7381, 523, 10476, 1337, 526, 285195, 528, 7384, 9016, 527	944	100	9027	2.96437	0.000353627	1.36034e-05	0.000102188
GOTERM_BP_FAT	GO:0009259~ribonucleotide metabolic process	68	6.40905	9.13925e-08	1350, 5167, 4698, 10891, 4354, 4697, 5578, 9551, 38, 374291, 4967, 6392, 65018, 1349, 538, 1345, 79717, 1340, 4846, 201163, 139596, 1327, 272, 7381, 10476, 4830, 4695, 283927, 4696, 1337, 4694, 7385, 7384, 54539, 669, 1741, 132, 4707, 4704, 4701, 4702, 27089, 3357, 5208, 55526, 57017, 10411, 6622, 4716, 4717, 10312, 226, 4729, 4724, 4713, 4714, 6818, 2778, 4710, 521, 523, 23433, 6389, 120892, 433…	944	335	9027	1.94104	0.000621276	2.30171e-05	0.000179554
GOTERM_BP_FAT	GO:1902600~hydrogen ion transmembrane transport	26	2.45052	9.16886e-08	9550, 1350, 1340, 4697, 10312, 155066, 1327, 9296, 9551, 51606, 27089, 521, 4891, 7381, 523, 10476, 533, 1349, 1337, 1346, 526, 285195, 1345, 528, 7384, 527	944	76	9027	3.27138	0.000623288	2.2267e-05	0.000180136
GOTERM_CC_FAT	GO:0005747~mitochondrial respiratory chain complex I	19	1.79076	9.51809e-08	54539, 4698, 4707, 4716, 6622, 4697, 4717, 4729, 4724, 4704, 4713, 4701, 4714, 4702, 4710, 374291, 4695, 4696, 4694	907	42	8395	4.18714	8.02343e-05	5.34915e-06	0.000147108
GOTERM_CC_FAT	GO:0045271~respiratory chain complex I	19	1.79076	9.51809e-08	54539, 4698, 4707, 4716, 6622, 4697, 4717, 4729, 4724, 4704, 4713, 4701, 4714, 4702, 4710, 374291, 4695, 4696, 4694	907	42	8395	4.18714	8.02343e-05	5.34915e-06	0.000147108
GOTERM_CC_FAT	GO:0030964~NADH dehydrogenase complex	19	1.79076	9.51809e-08	54539, 4698, 4707, 4716, 6622, 4697, 4717, 4729, 4724, 4704, 4713, 4701, 4714, 4702, 4710, 374291, 4695, 4696, 4694	907	42	8395	4.18714	8.02343e-05	5.34915e-06	0.000147108
GOTERM_BP_FAT	GO:0009150~purine ribonucleotide metabolic process	66	6.22055	1.12618e-07	1350, 5167, 4698, 10891, 4354, 4697, 5578, 9551, 38, 374291, 4967, 6392, 65018, 1349, 538, 1345, 79717, 1340, 4846, 201163, 1327, 272, 7381, 10476, 4830, 4695, 283927, 4696, 1337, 4694, 7385, 7384, 54539, 669, 1741, 132, 4707, 4704, 4701, 4702, 27089, 3357, 5208, 55526, 57017, 10411, 6622, 4716, 4717, 10312, 226, 4729, 4724, 4713, 4714, 6818, 2778, 4710, 521, 523, 23433, 6389, 120892, 4338, 526, …	944	323	9027	1.95395	0.00076551	2.64067e-05	0.000221255
GOTERM_CC_FAT	GO:0031967~organelle envelope	146	13.7606	2.17427e-07	2647, 6770, 23511, 4698, 26164, 4697, 84274, 9551, 37, 38, 374291, 23305, 1327, 51230, 5366, 1593, 4891, 10628, 9868, 4830, 10476, 1984, 80219, 4695, 4696, 80179, 4694, 345778, 54881, 54539, 51025, 10229, 8760, 54534, 7329, 55219, 373156, 27089, 84514, 51300, 57142, 3837, 3836, 3838, 128866, 132671, 10493, 51117, 6272, 521, 125170, 29093, 6389, 25915, 79135, 1471, 1632, 192286, 2182, 23203, 1350,…	907	905	8395	1.4932	0.000183274	1.14556e-05	0.000336046
GOTERM_CC_FAT	GO:0031975~envelope	146	13.7606	2.533e-07	2647, 6770, 23511, 4698, 26164, 4697, 84274, 9551, 37, 38, 374291, 23305, 1327, 51230, 5366, 1593, 4891, 10628, 9868, 4830, 10476, 1984, 80219, 4695, 4696, 80179, 4694, 345778, 54881, 54539, 51025, 10229, 8760, 54534, 7329, 55219, 373156, 27089, 84514, 51300, 57142, 3837, 3836, 3838, 128866, 132671, 10493, 51117, 6272, 521, 125170, 29093, 6389, 25915, 79135, 1471, 1632, 192286, 2182, 23203, 1350,…	907	907	8395	1.48991	0.000213509	1.25606e-05	0.000391489
GOTERM_MF_FAT	GO:0050136~NADH dehydrogenase (quinone) activity	17	1.60226	2.73089e-07	4698, 4707, 4716, 4697, 4717, 4729, 4724, 4704, 4713, 4701, 4714, 4702, 4710, 374291, 4695, 4696, 4694	845	38	8342	4.41651	0.000405729	0.000202885	0.000453232
GOTERM_MF_FAT	GO:0008137~NADH dehydrogenase (ubiquinone) activity	17	1.60226	2.73089e-07	4698, 4707, 4716, 4697, 4717, 4729, 4724, 4704, 4713, 4701, 4714, 4702, 4710, 374291, 4695, 4696, 4694	845	38	8342	4.41651	0.000405729	0.000202885	0.000453232
GOTERM_MF_FAT	GO:0003954~NADH dehydrogenase activity	17	1.60226	2.73089e-07	4698, 4707, 4716, 4697, 4717, 4729, 4724, 4704, 4713, 4701, 4714, 4702, 4710, 374291, 4695, 4696, 4694	845	38	8342	4.41651	0.000405729	0.000202885	0.000453232
GOTERM_BP_FAT	GO:0006163~purine nucleotide metabolic process	67	6.3148	4.55076e-07	1350, 5167, 4698, 10891, 4354, 4697, 5578, 9551, 38, 374291, 4967, 6392, 65018, 1349, 538, 1345, 79717, 1340, 4846, 10059, 201163, 1327, 272, 7381, 10476, 4830, 4695, 283927, 4696, 1337, 4694, 7385, 7384, 54539, 669, 1741, 132, 4707, 4704, 4701, 4702, 27089, 3357, 5208, 55526, 57017, 10411, 6622, 4716, 4717, 10312, 226, 4729, 4724, 4713, 4714, 6818, 2778, 4710, 521, 523, 23433, 6389, 120892, 4338…	944	342	9027	1.87336	0.00308973	0.000103145	0.00089406
GOTERM_BP_FAT	GO:0070663~regulation of leukocyte proliferation	27	2.54477	9.06648e-07	4208, 920, 3127, 1435, 11151, 966, 1604, 6352, 3965, 4254, 199, 3659, 5777, 3133, 3105, 11326, 3635, 3113, 5880, 3115, 972, 3718, 7099, 6385, 6777, 4067, 3123	944	90	9027	2.86875	0.00614625	0.000198858	0.00178123
GOTERM_BP_FAT	GO:0072521~purine-containing compound metabolic process	69	6.5033	1.05114e-06	22875, 1350, 5167, 4698, 10891, 4354, 4697, 5578, 9551, 38, 374291, 4967, 6392, 65018, 1349, 538, 1345, 79717, 1340, 4846, 10059, 201163, 1327, 272, 7381, 10476, 4830, 4695, 283927, 4696, 1337, 4694, 7385, 7384, 54539, 669, 1741, 132, 4707, 4704, 4701, 4702, 27089, 1806, 3357, 5208, 55526, 57017, 10411, 6622, 4716, 4717, 10312, 226, 4729, 4724, 4713, 4714, 6818, 2778, 4710, 521, 523, 23433, 6389,…	944	364	9027	1.81267	0.00712227	0.000223342	0.0020651
GOTERM_BP_FAT	GO:0006811~ion transport	111	10.4618	1.31538e-06	4208, 7291, 9550, 10999, 5167, 4697, 11151, 10891, 682, 1193, 1317, 79689, 9551, 2744, 288, 6352, 533, 538, 6769, 1186, 10809, 29988, 1327, 10916, 4891, 80228, 6406, 10476, 11001, 117247, 920, 215, 347735, 9368, 18, 51606, 27089, 6584, 2170, 10312, 26133, 30061, 114134, 6387, 521, 523, 54946, 28232, 51185, 29098, 7531, 526, 528, 2182, 527, 3934, 1350, 10955, 84102, 10396, 65010, 9104, 57380, 1349…	944	682	9027	1.55636	0.00890469	0.000271011	0.00258422
KEGG_PATHWAY	hsa05150:Staphylococcus aureus infection	15	1.41376	1.33907e-06	3113, 3127, 3111, 3115, 6404, 718, 713, 712, 3689, 714, 2212, 2214, 3123, 629, 3122	473	29	3968	4.33914	0.000366839	7.33785e-05	0.00176464
GOTERM_BP_FAT	GO:0006753~nucleoside phosphate metabolic process	78	7.35156	1.37457e-06	1350, 5167, 4698, 10891, 4697, 4354, 5578, 5160, 9551, 38, 374291, 4967, 6392, 65018, 1349, 538, 1345, 79717, 1340, 4846, 10059, 201163, 139596, 1327, 272, 7381, 10476, 4830, 4695, 283927, 4696, 1337, 4694, 7385, 7384, 54539, 3420, 669, 1741, 132, 4707, 4704, 4701, 4702, 27089, 83594, 3357, 5208, 3417, 55526, 7084, 57017, 23729, 10411, 6622, 4716, 4717, 10312, 226, 4729, 4724, 4713, 4714, 6818, 2…	944	432	9027	1.72656	0.00930357	0.000274877	0.00270052
GOTERM_BP_FAT	GO:1901135~carbohydrate derivative metabolic process	123	11.5928	1.38442e-06	57171, 22875, 5167, 4698, 4697, 10891, 51005, 9551, 38, 22906, 374291, 92579, 374907, 538, 11320, 23071, 79717, 64122, 1280, 139596, 1327, 272, 3718, 11285, 79158, 6609, 10005, 4830, 10476, 2760, 4695, 283927, 4696, 10007, 4694, 54539, 10327, 27089, 55526, 23729, 10411, 10312, 226, 6818, 2778, 427, 7915, 521, 6389, 523, 23433, 6385, 1471, 526, 83549, 1350, 4354, 5578, 84572, 57134, 6392, 4967, 10…	944	777	9027	1.51375	0.00936989	0.000268937	0.00271986
GOTERM_CC_FAT	GO:0070062~extracellular exosome	262	24.6937	1.48066e-06	153364, 10890, 8741, 38, 80210, 80208, 8878, 11320, 3920, 1829, 2202, 11326, 51368, 79717, 79812, 6780, 100037417, 1327, 50618, 7879, 929, 6609, 9868, 10476, 1984, 7076, 3911, 8411, 2212, 2214, 1435, 823, 347735, 829, 826, 84299, 51596, 10875, 214, 27183, 18, 217, 10327, 23011, 175, 23295, 114876, 149951, 629, 221, 112483, 140885, 3837, 130589, 226, 128866, 10493, 55207, 427, 6387, 112574, 7052, …	907	1887	8395	1.28512	0.00124742	6.9342e-05	0.00228843
GOTERM_CC_FAT	GO:0043230~extracellular organelle	263	24.7879	1.52764e-06	153364, 10890, 8741, 38, 80210, 80208, 8878, 11320, 3920, 1829, 2202, 11326, 51368, 79717, 79812, 6780, 100037417, 1327, 50618, 7879, 929, 6609, 9868, 10476, 1984, 7076, 3911, 8411, 2212, 2214, 1435, 823, 347735, 829, 826, 84299, 51596, 10875, 214, 27183, 18, 217, 10327, 23011, 175, 23295, 114876, 149951, 629, 221, 112483, 140885, 3837, 130589, 226, 128866, 10493, 55207, 427, 6387, 112574, 7052, …	907	1896	8395	1.2839	0.00128697	6.77766e-05	0.00236103
GOTERM_CC_FAT	GO:1903561~extracellular vesicle	263	24.7879	1.52764e-06	153364, 10890, 8741, 38, 80210, 80208, 8878, 11320, 3920, 1829, 2202, 11326, 51368, 79717, 79812, 6780, 100037417, 1327, 50618, 7879, 929, 6609, 9868, 10476, 1984, 7076, 3911, 8411, 2212, 2214, 1435, 823, 347735, 829, 826, 84299, 51596, 10875, 214, 27183, 18, 217, 10327, 23011, 175, 23295, 114876, 149951, 629, 221, 112483, 140885, 3837, 130589, 226, 128866, 10493, 55207, 427, 6387, 112574, 7052, …	907	1896	8395	1.2839	0.00128697	6.77766e-05	0.00236103
GOTERM_BP_FAT	GO:0032944~regulation of mononuclear cell proliferation	26	2.45052	1.63415e-06	4208, 920, 3127, 1435, 11151, 966, 1604, 6352, 3965, 199, 3659, 5777, 3133, 3105, 11326, 3635, 3113, 3115, 5880, 972, 3718, 7099, 6385, 6777, 4067, 3123	944	87	9027	2.85776	0.0110507	0.000308625	0.00321048
GOTERM_BP_FAT	GO:0009117~nucleotide metabolic process	77	7.2573	1.70851e-06	1350, 5167, 4698, 10891, 4354, 4697, 5578, 5160, 9551, 38, 374291, 4967, 6392, 65018, 1349, 538, 1345, 79717, 1340, 4846, 10059, 201163, 139596, 1327, 272, 7381, 10476, 4830, 4695, 283927, 4696, 1337, 4694, 7385, 7384, 54539, 3420, 669, 1741, 132, 4707, 4704, 4701, 4702, 27089, 83594, 3357, 5208, 3417, 55526, 7084, 57017, 23729, 10411, 6622, 4716, 4717, 10312, 226, 4729, 4724, 4713, 4714, 6818, 2…	944	427	9027	1.72439	0.0115507	0.000313948	0.00335657
GOTERM_BP_FAT	GO:0010257~NADH dehydrogenase complex assembly	20	1.88501	1.88859e-06	54539, 4698, 4707, 4716, 4717, 4729, 4724, 4704, 4713, 4701, 4714, 4702, 4710, 374291, 25915, 4695, 4696, 4694, 51300, 9131	944	56	9027	3.41518	0.0127603	0.000337901	0.00371034
GOTERM_BP_FAT	GO:0097031~mitochondrial respiratory chain complex I biogenesis	20	1.88501	1.88859e-06	54539, 4698, 4707, 4716, 4717, 4729, 4724, 4704, 4713, 4701, 4714, 4702, 4710, 374291, 25915, 4695, 4696, 4694, 51300, 9131	944	56	9027	3.41518	0.0127603	0.000337901	0.00371034
GOTERM_BP_FAT	GO:0032981~mitochondrial respiratory chain complex I assembly	20	1.88501	1.88859e-06	54539, 4698, 4707, 4716, 4717, 4729, 4724, 4704, 4713, 4701, 4714, 4702, 4710, 374291, 25915, 4695, 4696, 4694, 51300, 9131	944	56	9027	3.41518	0.0127603	0.000337901	0.00371034
KEGG_PATHWAY	hsa01100:Metabolic pathways	138	13.0066	1.89792e-06	9453, 221830, 686, 9550, 5167, 4698, 4697, 5438, 5439, 84274, 54107, 5160, 35, 1577, 280, 9551, 1576, 2744, 37, 38, 374291, 92579, 533, 11320, 23305, 56994, 79717, 55224, 139596, 1327, 272, 54995, 11285, 1593, 6609, 10005, 4830, 5834, 10476, 4695, 10621, 4696, 10007, 4694, 54539, 3420, 10229, 18, 8760, 217, 10327, 55163, 3028, 27089, 51606, 3417, 221, 5051, 112483, 55304, 10312, 130589, 226, 1128…	473	816	3968	1.41873	0.000519896	8.66681e-05	0.00250108
GOTERM_BP_FAT	GO:0055086~nucleobase-containing small molecule metabolic process	82	7.72856	2.04321e-06	22875, 1350, 5167, 4698, 10891, 4697, 7295, 4354, 5578, 5160, 9551, 38, 374291, 4967, 6392, 65018, 1349, 538, 1345, 79717, 1340, 4846, 10059, 201163, 139596, 1327, 272, 7381, 10476, 4830, 81890, 4695, 4696, 283927, 1337, 4694, 7385, 7384, 54539, 3420, 669, 1741, 132, 4707, 4704, 4701, 4702, 27089, 83594, 1806, 3357, 5208, 3417, 55526, 7084, 57017, 23729, 10411, 6622, 4716, 4717, 10312, 226, 4729,…	944	466	9027	1.68267	0.0137978	0.000356189	0.00401411
GOTERM_BP_FAT	GO:0032787~monocarboxylic acid metabolic process	65	6.1263	2.07183e-06	6770, 686, 7291, 10999, 5164, 10891, 682, 64801, 35, 5160, 83875, 37, 38, 8013, 9104, 747, 79993, 2109, 4967, 23038, 84869, 80142, 23305, 197322, 1382, 972, 80221, 54995, 80270, 1593, 10005, 11001, 6777, 6776, 80724, 219743, 669, 2938, 215, 26063, 10327, 5208, 2879, 3417, 55526, 2170, 26027, 145482, 6622, 54704, 5096, 226, 112817, 2639, 5467, 7915, 79966, 718, 58526, 1056, 50640, 1632, 51248, 553…	944	342	9027	1.81743	0.0139897	0.000352149	0.00407033
GOTERM_BP_FAT	GO:0043436~oxoacid metabolic process	91	8.57681	2.47236e-06	6770, 686, 7291, 10999, 5164, 10891, 682, 64801, 5160, 35, 51005, 83875, 6821, 2744, 37, 8013, 38, 9104, 747, 79993, 2109, 4967, 23038, 84869, 80142, 23305, 4846, 92259, 197322, 2806, 1382, 501, 972, 80221, 54995, 80270, 2805, 1593, 10005, 11001, 6777, 6776, 4357, 10007, 80724, 219743, 3420, 669, 2938, 215, 2937, 26063, 18, 10327, 5188, 3035, 5208, 4677, 2879, 3417, 55526, 2170, 26027, 145482, 66…	944	536	9027	1.62348	0.0166716	0.000409967	0.00485721
GOTERM_CC_FAT	GO:0010008~endosome membrane	63	5.93779	3.1871e-06	3111, 10890, 26088, 55275, 5912, 202915, 533, 3920, 3105, 4360, 223082, 90203, 80230, 55697, 84440, 9779, 10058, 6293, 23643, 8027, 7879, 25978, 93343, 4891, 929, 9482, 11230, 55652, 8411, 80772, 285195, 3127, 55062, 968, 79666, 155066, 55317, 51201, 27183, 6845, 114883, 23011, 5868, 55529, 3134, 3133, 3113, 3115, 10312, 27243, 128866, 6272, 55207, 55823, 112574, 7099, 9842, 567, 64089, 3123, 835…	907	322	8395	1.81092	0.00268312	0.000134327	0.00492573
GOTERM_BP_FAT	GO:0019752~carboxylic acid metabolic process	90	8.48256	3.5118e-06	6770, 686, 7291, 10999, 5164, 10891, 682, 64801, 5160, 35, 51005, 83875, 2744, 37, 8013, 38, 9104, 747, 79993, 2109, 4967, 23038, 84869, 80142, 23305, 4846, 92259, 197322, 2806, 1382, 501, 972, 80221, 54995, 80270, 2805, 1593, 10005, 11001, 6777, 6776, 4357, 10007, 80724, 219743, 3420, 669, 2938, 215, 2937, 26063, 18, 10327, 5188, 3035, 5208, 4677, 2879, 3417, 55526, 2170, 26027, 145482, 6622, 54…	944	533	9027	1.61468	0.0235974	0.000568416	0.00689921
GOTERM_BP_FAT	GO:0006082~organic acid metabolic process	96	9.04807	3.57093e-06	6770, 686, 7291, 10999, 5164, 10891, 682, 64801, 5160, 35, 51005, 83875, 6821, 2744, 37, 8013, 38, 9104, 747, 79993, 2109, 4967, 6392, 538, 23038, 84869, 80142, 23305, 64122, 4846, 92259, 197322, 2806, 1382, 501, 972, 80221, 54995, 80270, 2805, 1593, 10005, 11001, 6777, 6776, 4357, 10007, 80724, 219743, 3420, 669, 2938, 215, 2937, 26063, 18, 10327, 3028, 5188, 3035, 1806, 5208, 4677, 2879, 3417, …	944	579	9027	1.58549	0.0239899	0.000564547	0.00701538
GOTERM_CC_FAT	GO:0044440~endosomal part	66	6.22055	3.59334e-06	3111, 10890, 26088, 55275, 5912, 202915, 533, 3920, 3105, 4360, 223082, 90203, 80230, 55697, 84440, 9779, 10058, 6293, 23643, 8027, 25978, 7879, 93343, 929, 4891, 9482, 11230, 55652, 8411, 80772, 285195, 3127, 55062, 968, 5618, 79666, 155066, 55317, 51201, 27183, 6845, 114883, 23011, 5868, 3134, 55529, 3133, 3113, 3115, 10312, 128866, 27243, 6272, 55207, 55823, 112574, 120892, 7099, 9842, 567, 64…	907	344	8395	1.77582	0.00302461	0.000144237	0.00555358
GOTERM_CC_FAT	GO:0030670~phagocytic vesicle membrane	18	1.69651	3.73314e-06	5880, 9367, 10890, 10312, 11151, 155066, 6845, 7879, 533, 3920, 567, 5868, 3134, 3133, 1536, 3105, 83547, 527	907	47	8395	3.54477	0.0031421	0.000143037	0.00576964
GOTERM_CC_FAT	GO:0030666~endocytic vesicle membrane	29	2.73327	3.85771e-06	3127, 9367, 10890, 11151, 155066, 6845, 533, 3920, 5868, 3134, 3133, 3105, 3113, 5880, 3115, 4846, 8976, 10312, 9779, 2892, 972, 7879, 23166, 567, 1536, 83547, 3123, 3122, 527	907	105	8395	2.55636	0.00324678	0.000141384	0.00596216
GOTERM_MF_FAT	GO:0016655~oxidoreductase activity, acting on NAD(P)H, quinone or similar compound as acceptor	18	1.69651	4.07457e-06	4698, 4707, 4716, 4697, 4717, 4729, 4724, 4704, 4713, 4701, 4714, 4702, 4710, 374291, 4695, 4696, 84869, 4694	845	50	8342	3.55399	0.00603654	0.00201624	0.00676216
GOTERM_CC_FAT	GO:0044437~vacuolar part	95	8.95382	4.1134e-06	2647, 3111, 9550, 5167, 10890, 26088, 5912, 55275, 202915, 80208, 533, 3920, 7805, 3105, 4360, 223082, 1186, 90203, 80230, 84440, 55697, 9779, 10058, 29988, 7780, 6293, 8027, 23643, 2717, 9296, 972, 25978, 7879, 93343, 929, 10437, 4891, 6609, 9482, 2760, 11230, 55652, 80772, 8411, 285195, 11337, 3127, 55062, 968, 5618, 79666, 155066, 55317, 27183, 51201, 114883, 6845, 23011, 51606, 9672, 114876, …	907	556	8395	1.58147	0.0034616	0.000144473	0.00635732
GOTERM_CC_FAT	GO:0005759~mitochondrial matrix	69	6.5033	4.34412e-06	2647, 686, 23203, 5164, 26164, 11222, 35, 5160, 60528, 83875, 6821, 37, 2744, 38, 374291, 2109, 4967, 84869, 708, 64981, 26073, 92259, 6648, 90624, 197322, 92399, 2806, 501, 80221, 60488, 6832, 64975, 1593, 51264, 64976, 23479, 80724, 6742, 51025, 3420, 3313, 4704, 18, 54534, 4701, 217, 3028, 373156, 55217, 55526, 7084, 5303, 51110, 54704, 5096, 2639, 64949, 7915, 29093, 8802, 120892, 8801, 23438…	907	367	8395	1.74019	0.00365541	0.000146473	0.00671389
GOTERM_BP_FAT	GO:0050670~regulation of lymphocyte proliferation	25	2.35627	4.6357e-06	3113, 4208, 3127, 920, 5880, 3115, 11151, 966, 972, 3718, 1604, 6352, 3965, 7099, 199, 6385, 6777, 3659, 5777, 4067, 3133, 3105, 3123, 3635, 11326	944	86	9027	2.7798	0.0310312	0.000716171	0.00910712
GOTERM_BP_FAT	GO:0070665~positive regulation of leukocyte proliferation	19	1.79076	4.69106e-06	4208, 3113, 920, 1435, 3115, 11151, 966, 972, 3718, 1604, 6352, 3965, 4254, 7099, 199, 6777, 4067, 3133, 3105	944	54	9027	3.36458	0.0313959	0.000708621	0.00921587
GOTERM_BP_FAT	GO:0007005~mitochondrion organization	92	8.67107	5.13136e-06	23203, 4698, 10891, 26164, 11222, 10245, 60528, 59286, 728489, 374291, 3433, 79680, 8878, 65018, 538, 2101, 10440, 708, 10063, 64981, 26073, 5880, 4846, 92259, 6648, 10059, 201163, 64432, 92399, 10533, 3791, 5695, 1759, 60488, 6832, 5366, 9821, 64975, 51264, 7381, 64976, 9868, 81892, 4695, 54968, 4696, 4358, 4694, 345778, 6742, 54539, 51025, 55062, 4707, 4704, 54534, 4701, 4702, 3028, 5188, 64756…	944	553	9027	1.59087	0.0342916	0.000758263	0.0100808
GOTERM_BP_FAT	GO:0051186~cofactor metabolic process	56	5.27804	5.17456e-06	686, 5164, 10891, 84274, 5160, 645, 38, 79993, 4967, 84869, 23305, 79717, 56997, 10058, 197322, 80221, 54995, 4891, 23479, 10005, 80219, 283927, 93058, 7389, 669, 3420, 10229, 4682, 4704, 55163, 83594, 5208, 3417, 54977, 55526, 57017, 23729, 26027, 54704, 6622, 5096, 226, 5092, 2639, 51647, 51117, 51071, 79966, 8802, 2539, 27102, 8801, 64428, 4338, 51248, 2182	944	287	9027	1.86585	0.0345752	0.000748382	0.0101657
GOTERM_CC_FAT	GO:0005774~vacuolar membrane	85	8.01131	5.33679e-06	2647, 3111, 9550, 5167, 10890, 26088, 5912, 55275, 202915, 80208, 533, 3920, 7805, 3105, 4360, 223082, 1186, 90203, 80230, 55697, 84440, 9779, 10058, 29988, 7780, 6293, 23643, 8027, 9296, 972, 25978, 7879, 93343, 929, 4891, 9482, 11230, 55652, 80772, 8411, 285195, 11337, 3127, 55062, 968, 79666, 155066, 55317, 27183, 51201, 114883, 6845, 23011, 51606, 114876, 11345, 5868, 3134, 55529, 3133, 3113,…	907	485	8395	1.62215	0.00448882	0.00017302	0.008248
GOTERM_BP_FAT	GO:0090383~phagosome acidification	11	1.03676	5.64661e-06	9550, 523, 10312, 533, 155066, 9296, 526, 7879, 528, 51606, 527	944	19	9027	5.53618	0.0376692	0.000799618	0.011093
GOTERM_CC_FAT	GO:0000323~lytic vacuole	74	6.97455	6.38206e-06	2647, 3111, 9550, 5167, 10404, 8674, 8013, 288, 80208, 8878, 3920, 7805, 55850, 223082, 1186, 201163, 29988, 7780, 64129, 2717, 972, 25978, 7879, 2805, 10437, 4891, 6609, 9482, 2760, 55652, 11337, 3127, 9367, 10268, 823, 968, 55317, 27183, 6809, 6845, 51606, 9672, 175, 114876, 55529, 3113, 3115, 6622, 10312, 6272, 55207, 427, 1203, 5476, 55823, 523, 28962, 120892, 2495, 1201, 9842, 6385, 79443, 1…	907	407	8395	1.68287	0.00536565	0.000199243	0.0098634
GOTERM_CC_FAT	GO:0005764~lysosome	74	6.97455	6.38206e-06	2647, 3111, 9550, 5167, 10404, 8674, 8013, 288, 80208, 8878, 3920, 7805, 55850, 223082, 1186, 201163, 29988, 7780, 64129, 2717, 972, 25978, 7879, 2805, 10437, 4891, 6609, 9482, 2760, 55652, 11337, 3127, 9367, 10268, 823, 968, 55317, 27183, 6809, 6845, 51606, 9672, 175, 114876, 55529, 3113, 3115, 6622, 10312, 6272, 55207, 427, 1203, 5476, 55823, 523, 28962, 120892, 2495, 1201, 9842, 6385, 79443, 1…	907	407	8395	1.68287	0.00536565	0.000199243	0.0098634
GOTERM_CC_FAT	GO:0042611~MHC protein complex	11	1.03676	7.57316e-06	3113, 3127, 3111, 3115, 567, 3134, 972, 3133, 3105, 3123, 3122	907	19	8395	5.35861	0.00636386	0.000227981	0.0117041
KEGG_PATHWAY	hsa04932:Non-alcoholic fatty liver disease (NAFLD)	33	3.11027	7.85894e-06	54539, 1350, 4698, 4707, 4697, 4704, 4701, 4702, 27089, 374291, 6392, 1349, 1346, 1345, 5601, 1340, 4716, 4717, 4729, 4724, 4713, 1327, 3551, 4714, 4710, 7381, 6389, 4695, 4696, 1337, 4694, 7385, 7384	473	122	3968	2.26916	0.00215104	0.000307575	0.0103561
GOTERM_MF_FAT	GO:0016651~oxidoreductase activity, acting on NAD(P)H	22	2.07352	8.21942e-06	84817, 4698, 4707, 4716, 4697, 7295, 4717, 4729, 4724, 4704, 4713, 4701, 4714, 4702, 4710, 374291, 4695, 4696, 84869, 4694, 1536, 9131	845	74	8342	2.93498	0.0121398	0.00304887	0.0136405
GOTERM_CC_FAT	GO:0005773~vacuole	137	12.9123	8.5122e-06	2647, 9550, 5167, 10890, 11151, 26088, 1317, 10404, 79689, 8674, 8013, 288, 22906, 80208, 533, 8878, 538, 3920, 7805, 55850, 1186, 80230, 10807, 29988, 64129, 79890, 6293, 23643, 8027, 25978, 7879, 93343, 4891, 929, 6609, 2760, 55652, 8411, 11337, 3127, 920, 9367, 55062, 823, 5618, 55317, 51201, 27183, 6809, 114883, 23011, 51606, 23484, 175, 23295, 114876, 9777, 11345, 23325, 3134, 55529, 3133, 3…	907	891	8395	1.42317	0.00715013	0.000247411	0.0131553
GOTERM_BP_FAT	GO:0033108~mitochondrial respiratory chain complex assembly	23	2.16777	9.52234e-06	54539, 4698, 4707, 4716, 4717, 4729, 4724, 4704, 4713, 4701, 4714, 4702, 4710, 55245, 374291, 7381, 25915, 4695, 4696, 4694, 51300, 9131, 10063	944	78	9027	2.81971	0.0627003	0.0013206	0.0187064
GOTERM_CC_FAT	GO:0033176~proton-transporting V-type ATPase complex	10	0.942507	1.08192e-05	9550, 523, 10312, 533, 155066, 9296, 526, 528, 51606, 527	907	16	8395	5.78487	0.00907915	0.000303974	0.0167204
KEGG_PATHWAY	hsa05010:Alzheimer's disease	35	3.29877	1.26864e-05	54539, 1350, 823, 4698, 4707, 4697, 4704, 4701, 4702, 3028, 27089, 374291, 6392, 1349, 1346, 1345, 1340, 6622, 4716, 4717, 4729, 4724, 4713, 1327, 4714, 4710, 7381, 6389, 10476, 4695, 4696, 1337, 4694, 7385, 7384	473	136	3968	2.15894	0.00347007	0.000434419	0.0167171
GOTERM_CC_FAT	GO:0005768~endosome	99	9.33082	1.44667e-05	2647, 10890, 11151, 26088, 1317, 79689, 8674, 22906, 533, 8878, 538, 3920, 80230, 10807, 6293, 79890, 23643, 8027, 7879, 25978, 93343, 4891, 929, 6609, 55652, 8411, 920, 3127, 9367, 55062, 5618, 55317, 27183, 51201, 114883, 23011, 23484, 9777, 114876, 23295, 23325, 55529, 3134, 3133, 3113, 3115, 10312, 30061, 128866, 6272, 55207, 112574, 79443, 64089, 58528, 1471, 83547, 3123, 527, 3122, 3111, 59…	907	603	8395	1.51961	0.0121214	0.000393325	0.0223568
GOTERM_BP_FAT	GO:0006959~humoral immune response	21	1.97926	1.54246e-05	4208, 3127, 966, 6590, 1604, 7942, 718, 713, 6406, 712, 54209, 714, 567, 5777, 708, 3133, 3105, 629, 3123, 5699, 11326	944	69	9027	2.91033	0.0995746	0.00209556	0.0302995
GOTERM_BP_FAT	GO:0051453~regulation of intracellular pH	17	1.60226	1.58051e-05	9550, 10312, 155066, 9296, 51606, 7879, 65010, 1203, 523, 120892, 9777, 533, 1201, 526, 285195, 528, 527	944	48	9027	3.38672	0.101902	0.00210515	0.0310469
KEGG_PATHWAY	hsa05016:Huntington's disease	37	3.48728	1.8736e-05	54539, 1350, 4698, 4707, 10891, 4697, 5438, 5439, 4704, 4701, 4702, 27089, 374291, 6392, 1349, 1346, 1345, 1340, 4716, 6648, 4717, 4729, 4724, 4713, 1327, 4714, 4710, 7381, 6389, 7052, 10476, 4695, 4696, 1337, 4694, 7385, 7384	473	150	3968	2.06929	0.00512057	0.000570251	0.0246878
GOTERM_BP_FAT	GO:0006885~regulation of pH	18	1.69651	2.02932e-05	9550, 5164, 10312, 155066, 9296, 51606, 7879, 65010, 1203, 523, 120892, 9777, 533, 1201, 526, 285195, 528, 527	944	54	9027	3.1875	0.128897	0.00265024	0.0398615
GOTERM_BP_FAT	GO:0042592~homeostatic process	135	12.7238	2.06032e-05	6770, 4208, 9550, 5167, 5164, 11151, 10891, 7295, 1193, 1317, 35, 79689, 37, 8013, 288, 6352, 27338, 533, 2207, 538, 6498, 3920, 23071, 10161, 6780, 1280, 6358, 6688, 282809, 272, 25978, 7879, 3718, 5366, 4891, 23479, 8195, 4830, 6777, 55651, 2021, 80724, 3127, 1436, 920, 1435, 8550, 9368, 3313, 18, 3315, 55869, 51606, 29085, 9777, 221395, 6584, 2170, 9991, 10312, 226, 128866, 30061, 2639, 2778, …	944	918	9027	1.40625	0.130731	0.00263996	0.0404702
GOTERM_BP_FAT	GO:0006826~iron ion transport	15	1.41376	2.06046e-05	9550, 10312, 155066, 30061, 79689, 9296, 51606, 4891, 523, 533, 2495, 567, 526, 528, 527	944	39	9027	3.67788	0.13074	0.00259132	0.0404731
GOTERM_BP_FAT	GO:0030641~regulation of cellular pH	17	1.60226	2.12208e-05	9550, 10312, 155066, 9296, 51606, 7879, 65010, 1203, 523, 120892, 9777, 533, 1201, 526, 285195, 528, 527	944	49	9027	3.3176	0.134375	0.00262025	0.0416832
GOTERM_CC_FAT	GO:0044421~extracellular region part	293	27.6155	2.39335e-05	51575, 153364, 10890, 8741, 38, 80210, 6352, 80208, 8878, 11320, 3920, 1829, 2202, 11326, 51368, 79717, 79812, 6780, 100037417, 63935, 6358, 1327, 23643, 50618, 7879, 929, 6609, 9868, 3914, 10476, 1984, 7076, 3911, 8411, 2212, 2214, 1435, 823, 347735, 829, 84299, 826, 51596, 10875, 214, 27183, 18, 217, 10327, 23011, 21, 175, 23295, 114876, 149951, 629, 221, 112483, 140885, 3837, 130589, 226, 1288…	907	2220	8395	1.2216	0.019974	0.000630308	0.0369843
GOTERM_BP_FAT	GO:0006631~fatty acid metabolic process	47	4.42978	2.43798e-05	7291, 10999, 2938, 5164, 215, 10891, 26063, 5160, 35, 37, 38, 8013, 9104, 747, 2109, 79993, 2879, 23038, 84869, 80142, 2170, 23305, 26027, 145482, 6622, 54704, 5096, 197322, 2639, 972, 80221, 5467, 54995, 7915, 79966, 718, 10005, 58526, 1056, 11001, 50640, 6777, 6776, 1632, 80724, 219743, 2182	944	238	9027	1.88839	0.152772	0.00295607	0.0478869
GOTERM_BP_FAT	GO:0072512~trivalent inorganic cation transport	12	1.13101	2.68252e-05	4891, 9550, 523, 10312, 533, 155066, 79689, 9296, 526, 528, 51606, 527	944	26	9027	4.41346	0.166744	0.00319513	0.0526889
GOTERM_BP_FAT	GO:0015682~ferric iron transport	12	1.13101	2.68252e-05	4891, 9550, 523, 10312, 533, 155066, 79689, 9296, 526, 528, 51606, 527	944	26	9027	4.41346	0.166744	0.00319513	0.0526889
GOTERM_CC_FAT	GO:0005576~extracellular region	311	29.312	2.86145e-05	51575, 153364, 10890, 8741, 5638, 38, 80210, 6352, 80208, 8878, 11320, 3920, 6614, 1829, 2202, 11326, 51368, 79717, 79812, 6780, 59084, 100037417, 63935, 6358, 1327, 80830, 23643, 2324, 50618, 7879, 929, 6609, 9868, 3914, 10476, 1984, 7076, 3911, 8411, 2212, 2214, 1435, 823, 347735, 5618, 829, 84299, 826, 51596, 10875, 214, 27183, 18, 217, 10327, 23011, 21, 175, 23295, 114876, 149951, 629, 221, 1…	907	2383	8395	1.20795	0.0238337	0.000730713	0.0442162
GOTERM_BP_FAT	GO:0051452~intracellular pH reduction	13	1.22526	3.37053e-05	1203, 9550, 523, 10312, 533, 1201, 155066, 9296, 526, 7879, 528, 51606, 527	944	31	9027	4.01008	0.20483	0.00394392	0.0661982
GOTERM_BP_FAT	GO:0042129~regulation of T cell proliferation	20	1.88501	3.51766e-05	3113, 920, 3127, 5880, 3115, 11151, 966, 3718, 1604, 6352, 3965, 199, 6385, 6777, 3659, 5777, 3133, 3105, 3123, 11326	944	67	9027	2.85448	0.212746	0.00404611	0.0690869
GOTERM_BP_FAT	GO:0070661~leukocyte proliferation	29	2.73327	3.7391e-05	4208, 920, 3127, 1435, 11151, 966, 1604, 6352, 3965, 4254, 199, 3659, 5777, 3133, 3105, 5699, 3635, 11326, 3113, 5880, 3115, 972, 3718, 7099, 6385, 6777, 4067, 3123, 896	944	121	9027	2.29184	0.224512	0.00422875	0.0734344
GOTERM_BP_FAT	GO:0019637~organophosphate metabolic process	107	10.0848	4.44707e-05	9453, 57171, 5167, 4698, 4697, 10891, 5160, 9551, 38, 374291, 92579, 538, 56994, 79717, 55224, 139596, 1327, 272, 113791, 6609, 10476, 4830, 4695, 4696, 283927, 4694, 54539, 3420, 1436, 347735, 8760, 10327, 27089, 221395, 3417, 55526, 2170, 55529, 23729, 10411, 10312, 226, 6818, 2778, 521, 7915, 6389, 523, 23433, 56623, 526, 83549, 1350, 5781, 4354, 5578, 10955, 4254, 6392, 4967, 65018, 1349, 134…	944	703	9027	1.45546	0.260963	0.00494523	0.0873329
GOTERM_BP_FAT	GO:0051188~cofactor biosynthetic process	33	3.11027	4.5392e-05	5164, 10229, 4682, 84274, 5160, 4704, 55163, 38, 79993, 54977, 23305, 57017, 79717, 26027, 54704, 56997, 10058, 197322, 5092, 2639, 51647, 51117, 80221, 4891, 79966, 23479, 10005, 64428, 80219, 4338, 93058, 7389, 2182	944	148	9027	2.13218	0.265579	0.00496622	0.0891415
GOTERM_BP_FAT	GO:0032943~mononuclear cell proliferation	28	2.63902	4.59286e-05	4208, 920, 3127, 1435, 11151, 966, 1604, 6352, 3965, 199, 3659, 5777, 3133, 3105, 5699, 3635, 11326, 3113, 5880, 3115, 972, 3718, 7099, 6385, 6777, 4067, 3123, 896	944	116	9027	2.30819	0.268254	0.00494522	0.0901949
GOTERM_BP_FAT	GO:0032946~positive regulation of mononuclear cell proliferation	17	1.60226	4.85765e-05	4208, 3113, 920, 1435, 3115, 11151, 966, 972, 3718, 1604, 6352, 3965, 7099, 199, 6777, 3133, 3105	944	52	9027	3.1262	0.281312	0.00514808	0.0953924
GOTERM_BP_FAT	GO:0045851~pH reduction	13	1.22526	4.88469e-05	1203, 9550, 523, 10312, 533, 1201, 155066, 9296, 526, 7879, 528, 51606, 527	944	32	9027	3.88477	0.282633	0.00509723	0.0959232
GOTERM_BP_FAT	GO:1903039~positive regulation of leukocyte cell-cell adhesion	25	2.35627	5.03508e-05	3113, 3127, 920, 3115, 5781, 11151, 966, 972, 79109, 3718, 1604, 8013, 6352, 64223, 3965, 199, 6777, 2113, 253260, 5777, 4067, 3133, 3105, 3123, 3122	944	98	9027	2.43941	0.289932	0.00517436	0.0988752
GOTERM_CC_FAT	GO:0044433~cytoplasmic vesicle part	67	6.3148	5.15915e-05	5919, 10890, 682, 11151, 55275, 1861, 10396, 65010, 202915, 533, 3920, 9144, 3105, 223082, 90203, 6645, 2157, 5880, 4846, 8976, 10059, 9779, 29988, 51014, 2892, 6293, 972, 7879, 23166, 6249, 7076, 2162, 11336, 9052, 3959, 3127, 9367, 22818, 5147, 966, 155066, 6809, 6845, 23011, 21, 5868, 3134, 3133, 23390, 3113, 3115, 6622, 10312, 226, 26958, 6854, 388662, 23433, 112574, 120892, 567, 7531, 1536, …	907	380	8395	1.63194	0.0425605	0.00127838	0.079708
GOTERM_CC_FAT	GO:0030659~cytoplasmic vesicle membrane	58	5.46654	5.26156e-05	10890, 682, 11151, 1861, 10396, 65010, 202915, 533, 3920, 9144, 3105, 90203, 6645, 223082, 5880, 4846, 8976, 10059, 9779, 51014, 29988, 2892, 972, 7879, 23166, 6249, 11336, 9052, 3127, 9367, 22818, 5147, 966, 155066, 6809, 6845, 23011, 21, 5868, 3134, 3133, 23390, 3113, 3115, 6622, 10312, 26958, 6854, 388662, 112574, 120892, 567, 7531, 1536, 83547, 3123, 527, 3122	907	315	8395	1.70424	0.0433867	0.00126651	0.0812896
GOTERM_BP_FAT	GO:0090382~phagosome maturation	12	1.13101	6.12389e-05	9550, 523, 10312, 11151, 533, 155066, 9296, 526, 7879, 528, 51606, 527	944	28	9027	4.09821	0.340608	0.00619621	0.120244
GOTERM_BP_FAT	GO:0007041~lysosomal transport	20	1.88501	6.82458e-05	55850, 6293, 84572, 55275, 51361, 6845, 6272, 7879, 25978, 22906, 79158, 55823, 4534, 9482, 120892, 23295, 64089, 83547, 22898, 6653	944	70	9027	2.73214	0.371291	0.00680158	0.133994
GOTERM_BP_FAT	GO:1903037~regulation of leukocyte cell-cell adhesion	32	3.01602	7.44055e-05	920, 3127, 3111, 5781, 11151, 966, 2934, 8013, 1604, 6352, 3965, 199, 3659, 253260, 5777, 3133, 3105, 11326, 3113, 5880, 3115, 972, 79109, 3718, 6387, 64223, 6385, 6777, 2113, 4067, 3123, 3122	944	145	9027	2.11034	0.397083	0.00730617	0.146079
GOTERM_BP_FAT	GO:0022409~positive regulation of cell-cell adhesion	27	2.54477	7.76911e-05	920, 3127, 5781, 11151, 966, 8013, 1604, 288, 6352, 3965, 199, 253260, 5777, 3133, 3105, 3113, 3115, 972, 79109, 3718, 64223, 6777, 2113, 4067, 3123, 2039, 3122	944	113	9027	2.28485	0.410405	0.00751901	0.152525
GOTERM_BP_FAT	GO:0009060~aerobic respiration	17	1.60226	8.08838e-05	2647, 3420, 5160, 7381, 6389, 4967, 8802, 6392, 8801, 3417, 55526, 1337, 3421, 7385, 7384, 9016, 50	944	54	9027	3.01042	0.423069	0.007717	0.158788
GOTERM_BP_FAT	GO:0046651~lymphocyte proliferation	27	2.54477	9.08676e-05	4208, 920, 3127, 11151, 966, 1604, 6352, 3965, 199, 3659, 5777, 3133, 3105, 5699, 11326, 3635, 3113, 3115, 5880, 972, 3718, 7099, 6385, 6777, 4067, 3123, 896	944	114	9027	2.2648	0.46094	0.0085456	0.178372
GOTERM_CC_FAT	GO:0097225~sperm midpiece	7	0.659755	9.79673e-05	65010, 9368, 79925, 8878, 26160, 11020, 11337	907	9	8395	7.19895	0.0792719	0.00229155	0.151307
GOTERM_BP_FAT	GO:0046395~carboxylic acid catabolic process	30	2.82752	0.00010006	7291, 10999, 215, 35, 18, 51005, 10327, 2744, 37, 38, 2109, 4967, 4846, 5096, 112817, 197322, 2806, 92675, 5092, 2639, 501, 5467, 2805, 7915, 10005, 11001, 1056, 10007, 1632, 80724	944	134	9027	2.14086	0.493608	0.00927784	0.1964
GOTERM_MF_FAT	GO:0036442~hydrogen-exporting ATPase activity	10	0.942507	0.000101698	9550, 523, 10312, 533, 155066, 9296, 526, 528, 51606, 527	845	21	8342	4.70104	0.140265	0.029774	0.16865
GOTERM_BP_FAT	GO:0033572~transferrin transport	11	1.03676	0.000111119	4891, 9550, 523, 10312, 533, 155066, 9296, 526, 528, 51606, 527	944	25	9027	4.2075	0.530296	0.0101596	0.218084
GOTERM_BP_FAT	GO:0050867~positive regulation of cell activation	31	2.92177	0.000121376	4208, 920, 3127, 5781, 11151, 966, 8741, 6845, 8013, 1604, 6352, 3965, 199, 2207, 253260, 5777, 3133, 3105, 3635, 3113, 3115, 972, 79109, 3718, 64223, 7099, 6777, 4067, 3123, 2039, 3122	944	142	9027	2.08759	0.561942	0.0109451	0.238191
GOTERM_BP_FAT	GO:0050671~positive regulation of lymphocyte proliferation	16	1.50801	0.000147358	3113, 4208, 920, 3115, 11151, 966, 972, 3718, 1604, 6352, 3965, 7099, 199, 6777, 3133, 3105	944	51	9027	3	0.632895	0.0130991	0.289109
GOTERM_BP_FAT	GO:0071346~cellular response to interferon-gamma	20	1.88501	0.000153658	10346, 4360, 3113, 6770, 3127, 3115, 2634, 6358, 65010, 10437, 6352, 3965, 199, 3659, 567, 3134, 3133, 3105, 3123, 3122	944	74	9027	2.58446	0.648291	0.0134791	0.301451
GOTERM_BP_FAT	GO:0019725~cellular homeostasis	72	6.78605	0.000157792	6770, 4208, 9550, 5167, 10891, 11151, 7295, 1317, 1193, 7301, 65010, 6352, 9104, 27338, 533, 23371, 65018, 538, 3920, 23038, 80142, 5777, 23071, 56255, 10161, 4846, 10058, 6358, 7780, 9296, 25978, 7879, 4891, 23479, 9709, 4830, 2021, 285195, 3127, 920, 2030, 9368, 4682, 155066, 51606, 1604, 3357, 4534, 29085, 9777, 169714, 6622, 10312, 226, 30061, 794, 1203, 6387, 523, 7052, 120892, 2495, 1201, 6…	944	445	9027	1.54719	0.658042	0.0136631	0.309549
GOTERM_CC_FAT	GO:0042613~MHC class II protein complex	8	0.754006	0.000159123	3113, 3127, 3111, 3115, 972, 3105, 3123, 3122	907	13	8395	5.69587	0.125542	0.00361914	0.245651
GOTERM_BP_FAT	GO:0043648~dicarboxylic acid metabolic process	17	1.60226	0.000164312	6770, 3420, 92259, 112817, 197322, 2806, 2744, 2805, 7915, 6389, 4967, 8802, 10005, 8801, 3417, 6777, 6776	944	57	9027	2.85197	0.672876	0.0140449	0.322321
GOTERM_BP_FAT	GO:0002696~positive regulation of leukocyte activation	30	2.82752	0.00017269	4208, 920, 3127, 5781, 11151, 966, 8741, 6845, 8013, 1604, 6352, 3965, 199, 2207, 253260, 5777, 3133, 3105, 3635, 3113, 3115, 972, 79109, 3718, 64223, 7099, 6777, 4067, 3123, 3122	944	138	9027	2.0788	0.690994	0.0145727	0.33873
GOTERM_BP_FAT	GO:0098927~vesicle-mediated transport between endosomal compartments	12	1.13101	0.000179858	55823, 11151, 9482, 8411, 5868, 64089, 51361, 4642, 23011, 83547, 7879, 6653	944	31	9027	3.70161	0.705696	0.0149871	0.352765
GOTERM_BP_FAT	GO:0050865~regulation of cell activation	44	4.14703	0.00018232	4208, 3127, 920, 3111, 5781, 11151, 966, 5578, 2934, 8741, 18, 6845, 7301, 1604, 8013, 6352, 3965, 199, 221395, 2207, 3659, 253260, 5777, 3133, 3105, 3635, 11326, 3113, 23729, 5880, 3115, 4846, 6622, 972, 79109, 3718, 64223, 7099, 6385, 6777, 4067, 3123, 3122, 2039	944	236	9027	1.78284	0.710583	0.0150068	0.357585
GOTERM_BP_FAT	GO:0042102~positive regulation of T cell proliferation	13	1.22526	0.0001824	3113, 920, 3115, 11151, 966, 3718, 1604, 6352, 3965, 199, 6777, 3133, 3105	944	36	9027	3.45312	0.710741	0.0148339	0.357743
GOTERM_BP_FAT	GO:0042098~T cell proliferation	21	1.97926	0.000185467	3113, 920, 3127, 3115, 11151, 966, 3718, 1604, 6352, 3965, 199, 6385, 6777, 3659, 5777, 3133, 3105, 3123, 5699, 896, 11326	944	81	9027	2.47917	0.716713	0.0149032	0.363748
GOTERM_BP_FAT	GO:0006732~coenzyme metabolic process	43	4.05278	0.000186088	669, 3420, 5164, 10229, 10891, 84274, 5160, 4704, 55163, 83594, 38, 79993, 4967, 5208, 3417, 55526, 23305, 57017, 79717, 23729, 26027, 6622, 54704, 56997, 226, 197322, 5092, 2639, 51117, 80221, 54995, 79966, 51071, 8802, 2539, 10005, 80219, 8801, 4338, 283927, 93058, 51248, 2182	944	229	9027	1.79558	0.717905	0.0147781	0.364963
KEGG_PATHWAY	hsa05152:Tuberculosis	27	2.54477	0.000189552	3127, 3111, 11151, 3313, 51606, 533, 2207, 3920, 5868, 5601, 3113, 4360, 3115, 10312, 972, 7879, 929, 718, 3689, 7099, 8411, 2212, 3587, 3123, 2214, 3122, 527	473	106	3968	2.13682	0.0506161	0.00518074	0.249506
GOTERM_CC_FAT	GO:0012506~vesicle membrane	58	5.46654	0.000194479	10890, 682, 11151, 1861, 10396, 65010, 202915, 533, 3920, 9144, 3105, 90203, 6645, 223082, 5880, 4846, 8976, 10059, 9779, 51014, 29988, 2892, 972, 7879, 23166, 6249, 11336, 9052, 3127, 9367, 22818, 5147, 966, 155066, 6809, 6845, 23011, 21, 5868, 3134, 3133, 23390, 3113, 3115, 6622, 10312, 26958, 6854, 388662, 112574, 120892, 567, 7531, 1536, 83547, 3123, 527, 3122	907	330	8395	1.62677	0.151226	0.00430549	0.300157
KEGG_PATHWAY	hsa05332:Graft-versus-host disease	9	0.848256	0.000203891	3113, 3127, 3111, 3115, 3134, 3133, 3105, 3123, 3122	473	16	3968	4.71882	0.0543397	0.00506638	0.268358
GOTERM_MF_FAT	GO:0015399~primary active transmembrane transporter activity	20	1.88501	0.000211391	9550, 215, 10312, 10952, 10245, 10058, 155066, 9296, 51606, 10396, 21, 4891, 523, 10476, 533, 538, 10440, 526, 528, 527	845	78	8342	2.53133	0.269598	0.0510129	0.350258
GOTERM_MF_FAT	GO:0015405~P-P-bond-hydrolysis-driven transmembrane transporter activity	20	1.88501	0.000211391	9550, 215, 10312, 10952, 10245, 10058, 155066, 9296, 51606, 10396, 21, 4891, 523, 10476, 533, 538, 10440, 526, 528, 527	845	78	8342	2.53133	0.269598	0.0510129	0.350258
GOTERM_CC_FAT	GO:0016471~vacuolar proton-transporting V-type ATPase complex	7	0.659755	0.000222535	9550, 10312, 533, 9296, 528, 51606, 527	907	10	8395	6.47905	0.171068	0.00479915	0.343388
GOTERM_BP_FAT	GO:0055067~monovalent inorganic cation homeostasis	19	1.79076	0.000222895	9550, 5164, 10312, 155066, 9296, 51606, 7879, 65010, 1203, 523, 3757, 120892, 9777, 533, 1201, 526, 285195, 528, 527	944	70	9027	2.59554	0.78038	0.0174718	0.437001
GOTERM_MF_FAT	GO:0009055~electron carrier activity	22	2.07352	0.000226389	3420, 1350, 1340, 4697, 4729, 35, 1327, 217, 2639, 10327, 37, 2109, 6389, 6392, 1349, 1346, 1337, 80724, 80142, 1345, 1536, 9131	845	91	8342	2.38668	0.2857	0.0469279	0.375065
GOTERM_BP_FAT	GO:0006744~ubiquinone biosynthetic process	8	0.754006	0.000235321	10229, 56997, 80219, 84274, 4704, 93058, 51117, 57017	944	14	9027	5.46429	0.798179	0.0182269	0.46131
GOTERM_BP_FAT	GO:0006103~2-oxoglutarate metabolic process	8	0.754006	0.000235321	3420, 92259, 4967, 2806, 6777, 3417, 6776, 2805	944	14	9027	5.46429	0.798179	0.0182269	0.46131
GOTERM_BP_FAT	GO:1901663~quinone biosynthetic process	8	0.754006	0.000235321	10229, 56997, 80219, 84274, 4704, 93058, 51117, 57017	944	14	9027	5.46429	0.798179	0.0182269	0.46131
GOTERM_BP_FAT	GO:0015672~monovalent inorganic cation transport	41	3.86428	0.000235589	7291, 1350, 9550, 4697, 9368, 155066, 4704, 9551, 27089, 51606, 288, 3757, 533, 6584, 1349, 1346, 26249, 1345, 11060, 1340, 4846, 10312, 29988, 1327, 9296, 114134, 521, 4891, 10916, 7381, 523, 10476, 29098, 1337, 7531, 526, 285195, 528, 7384, 527, 9016	944	217	9027	1.80674	0.798545	0.018042	0.461833
GOTERM_BP_FAT	GO:0006099~tricarboxylic acid cycle	11	1.03676	0.000236026	3420, 6389, 6392, 4967, 8802, 8801, 3417, 5160, 55526, 3421, 50	944	27	9027	3.89583	0.799144	0.0178739	0.462689
GOTERM_BP_FAT	GO:0045785~positive regulation of cell adhesion	39	3.67578	0.000242531	3127, 920, 1435, 5781, 11151, 966, 5578, 6809, 25890, 57580, 8013, 1604, 288, 6352, 3965, 3675, 199, 253260, 5777, 708, 3133, 3105, 3113, 3115, 201163, 3791, 972, 79109, 3718, 6387, 64223, 7052, 6385, 6777, 2113, 4067, 3123, 2039, 3122	944	203	9027	1.83713	0.807836	0.0181598	0.475411
GOTERM_BP_FAT	GO:0050870~positive regulation of T cell activation	23	2.16777	0.000245025	3113, 920, 3127, 3115, 5781, 11151, 966, 972, 79109, 3718, 1604, 6352, 3965, 64223, 199, 6777, 253260, 5777, 4067, 3133, 3105, 3123, 3122	944	95	9027	2.31513	0.811069	0.0181452	0.48029
GOTERM_BP_FAT	GO:0007034~vacuolar transport	46	4.33553	0.000252303	2647, 9367, 55062, 10890, 11151, 55317, 27183, 84572, 55275, 6845, 23011, 23484, 22906, 4534, 23295, 8878, 5868, 23325, 22898, 55850, 10807, 9779, 128866, 27243, 64129, 6293, 8027, 51361, 6272, 25978, 7879, 1203, 79158, 112574, 144717, 55823, 9482, 90196, 120892, 1201, 65009, 8411, 64089, 4642, 83547, 6653	944	254	9027	1.73179	0.820194	0.018478	0.494522
GOTERM_CC_FAT	GO:0005770~late endosome	36	3.39303	0.000261508	3127, 9367, 1317, 55317, 27183, 114883, 6845, 4534, 114876, 8878, 538, 3920, 55529, 55697, 7780, 30061, 27243, 128866, 55207, 972, 7879, 25978, 93343, 4891, 55823, 29058, 120892, 9482, 1201, 79443, 1471, 64089, 285195, 83547, 3123, 3122	907	177	8395	1.88253	0.197867	0.00549685	0.403414
GOTERM_BP_FAT	GO:0044255~cellular lipid metabolic process	96	9.04807	0.000267249	9453, 6770, 57171, 7291, 5919, 10999, 5781, 5164, 10891, 64801, 5160, 35, 1577, 83875, 10955, 1576, 37, 8013, 38, 9104, 747, 79993, 2109, 4254, 23038, 84869, 80142, 23305, 3635, 29956, 56994, 55224, 55697, 55852, 197322, 1382, 85365, 2717, 972, 80221, 113791, 54995, 7879, 6609, 10005, 11001, 2760, 6777, 6776, 283927, 80772, 80724, 219743, 1436, 2938, 8439, 347735, 215, 23054, 26063, 8760, 9091, 3…	944	645	9027	1.42326	0.837574	0.0193536	0.523743
GOTERM_BP_FAT	GO:0016197~endosomal transport	41	3.86428	0.000316767	2647, 9367, 55062, 10890, 11151, 55317, 27183, 55275, 6845, 23011, 23484, 22906, 4534, 23295, 8878, 5868, 23325, 22898, 10807, 9779, 128866, 64129, 27243, 6293, 8027, 51361, 6272, 25978, 7879, 1203, 112574, 144717, 55823, 9482, 90196, 120892, 8411, 64089, 4642, 83547, 6653	944	220	9027	1.7821	0.884022	0.0226581	0.620501
GOTERM_BP_FAT	GO:0006637~acyl-CoA metabolic process	18	1.69651	0.000323589	26027, 5164, 54704, 197322, 5160, 2639, 80221, 54995, 38, 79993, 79966, 8802, 10005, 4967, 8801, 283927, 23305, 2182	944	66	9027	2.60795	0.889281	0.0228997	0.633824
GOTERM_BP_FAT	GO:0035383~thioester metabolic process	18	1.69651	0.000323589	26027, 5164, 54704, 197322, 5160, 2639, 80221, 54995, 38, 79993, 79966, 8802, 10005, 4967, 8801, 283927, 23305, 2182	944	66	9027	2.60795	0.889281	0.0228997	0.633824
GOTERM_BP_FAT	GO:0000041~transition metal ion transport	19	1.79076	0.000325523	9550, 10312, 1317, 7780, 155066, 30061, 79689, 9296, 51606, 4891, 523, 2495, 533, 538, 567, 526, 528, 10063, 527	944	72	9027	2.52344	0.890728	0.0227978	0.637601
GOTERM_CC_FAT	GO:0016469~proton-transporting two-sector ATPase complex	13	1.22526	0.000331359	521, 9550, 523, 10312, 10476, 533, 155066, 9296, 526, 9551, 528, 51606, 527	907	37	8395	3.25203	0.243749	0.00679103	0.510911
GOTERM_BP_FAT	GO:0016054~organic acid catabolic process	31	2.92177	0.000334619	7291, 10999, 215, 35, 18, 51005, 10327, 3028, 2744, 37, 38, 2109, 4967, 4846, 5096, 112817, 197322, 2806, 92675, 5092, 2639, 501, 5467, 2805, 7915, 10005, 11001, 1056, 10007, 1632, 80724	944	150	9027	1.97625	0.897285	0.0231887	0.655362
GOTERM_BP_FAT	GO:0022407~regulation of cell-cell adhesion	36	3.39303	0.000341882	920, 3127, 3111, 5781, 11151, 966, 5578, 2934, 18, 8013, 1604, 288, 6352, 3965, 199, 3659, 253260, 5777, 3133, 3105, 11326, 3113, 5880, 3115, 972, 79109, 3718, 6387, 64223, 6385, 6777, 2113, 4067, 3123, 2039, 3122	944	185	9027	1.86081	0.902236	0.0234472	0.66954
KEGG_PATHWAY	hsa05320:Autoimmune thyroid disease	9	0.848256	0.000345443	3113, 3127, 3111, 3115, 3134, 3133, 3105, 3123, 3122	473	17	3968	4.44124	0.0903249	0.00785794	0.454274
KEGG_PATHWAY	hsa05330:Allograft rejection	9	0.848256	0.000345443	3113, 3127, 3111, 3115, 3134, 3133, 3105, 3123, 3122	473	17	3968	4.44124	0.0903249	0.00785794	0.454274
GOTERM_BP_FAT	GO:0030004~cellular monovalent inorganic cation homeostasis	17	1.60226	0.000385558	9550, 10312, 155066, 9296, 51606, 7879, 65010, 1203, 523, 120892, 9777, 533, 1201, 526, 285195, 528, 527	944	61	9027	2.66496	0.927364	0.0261401	0.754768
GOTERM_CC_FAT	GO:0045335~phagocytic vesicle	18	1.69651	0.000389677	5880, 9367, 10890, 10312, 11151, 155066, 6845, 7879, 533, 3920, 567, 5868, 3134, 3133, 1536, 3105, 83547, 527	907	65	8395	2.56314	0.280042	0.00779238	0.600576
GOTERM_BP_FAT	GO:0009108~coenzyme biosynthetic process	25	2.35627	0.000393087	5164, 10229, 84274, 5160, 4704, 55163, 38, 79993, 23305, 57017, 79717, 26027, 54704, 56997, 197322, 5092, 2639, 51117, 80221, 79966, 10005, 80219, 4338, 93058, 2182	944	111	9027	2.15372	0.930991	0.0263809	0.769453
GOTERM_BP_FAT	GO:0006743~ubiquinone metabolic process	8	0.754006	0.000401606	10229, 56997, 80219, 84274, 4704, 93058, 51117, 57017	944	15	9027	5.1	0.934876	0.0266818	0.786066
GOTERM_BP_FAT	GO:0050863~regulation of T cell activation	29	2.73327	0.000408692	920, 3127, 3111, 5781, 11151, 966, 2934, 1604, 6352, 3965, 199, 253260, 3659, 5777, 3133, 3105, 11326, 3113, 5880, 3115, 972, 79109, 3718, 64223, 6385, 6777, 4067, 3123, 3122	944	138	9027	2.00951	0.937941	0.0268837	0.799884
GOTERM_BP_FAT	GO:0098655~cation transmembrane transport	53	4.99529	0.000412887	1350, 9550, 4697, 11151, 1317, 1193, 84102, 9551, 10396, 288, 9104, 533, 1349, 538, 1346, 5777, 1345, 6769, 1340, 7780, 1327, 9296, 55129, 4891, 7381, 80228, 10476, 1337, 285195, 7384, 9368, 155066, 51606, 27089, 3357, 3757, 6584, 93129, 11060, 6622, 10312, 26133, 30061, 521, 523, 2539, 54946, 29098, 7531, 526, 4067, 528, 527	944	312	9027	1.6244	0.939687	0.0268959	0.808061
GOTERM_BP_FAT	GO:0006629~lipid metabolic process	114	10.7446	0.000412992	9453, 6770, 57171, 7291, 10999, 5164, 10891, 64801, 5160, 35, 1577, 83875, 51171, 1576, 37, 38, 8013, 747, 79993, 23305, 56994, 55224, 55852, 1382, 80221, 7879, 54995, 113791, 1593, 6609, 10005, 11001, 2760, 6777, 5934, 6776, 283927, 80724, 219743, 1436, 8439, 347735, 215, 5618, 26063, 8760, 3028, 114876, 221395, 3417, 2170, 55529, 221, 5051, 55304, 6818, 2639, 427, 7915, 79966, 718, 345557, 5852…	944	802	9027	1.35926	0.93973	0.0266474	0.808267
GOTERM_BP_FAT	GO:0008333~endosome to lysosome transport	13	1.22526	0.000424095	22906, 55823, 4534, 9482, 23295, 64089, 51361, 6845, 6272, 83547, 7879, 22898, 25978	944	39	9027	3.1875	0.944115	0.0270971	0.829911
GOTERM_MF_FAT	GO:0046961~proton-transporting ATPase activity, rotational mechanism	9	0.848256	0.000441006	523, 10312, 533, 155066, 9296, 526, 528, 51606, 527	845	20	8342	4.44249	0.480807	0.0786681	0.729405
GOTERM_BP_FAT	GO:0006790~sulfur compound metabolic process	45	4.24128	0.000446188	2938, 5167, 2939, 5164, 7295, 2937, 1193, 4682, 5160, 10327, 6821, 373156, 38, 79993, 4967, 3417, 23305, 26027, 6622, 54704, 6648, 197322, 266722, 6818, 2639, 51647, 80221, 54995, 7915, 79966, 23479, 10005, 2539, 8802, 64428, 8801, 6777, 4357, 283927, 6776, 8704, 55790, 84836, 4166, 2182	944	253	9027	1.70084	0.951914	0.0282238	0.872964
GOTERM_BP_FAT	GO:0043623~cellular protein complex assembly	65	6.1263	0.000463847	4698, 11151, 8674, 57580, 6352, 374291, 27338, 199, 3052, 65018, 253260, 10063, 2801, 8976, 10059, 7979, 1759, 7381, 64223, 8195, 6249, 4695, 54968, 4696, 4694, 2059, 54539, 4707, 5618, 829, 9535, 2934, 4704, 4701, 6845, 4702, 64756, 9777, 51300, 5829, 25802, 7111, 57142, 6622, 4716, 3837, 3059, 4717, 10312, 4729, 4724, 27243, 4713, 4714, 55245, 4710, 5997, 7099, 25915, 58526, 91647, 9131, 3123, …	944	406	9027	1.53094	0.957357	0.0290545	0.907365
GOTERM_BP_FAT	GO:0006812~cation transport	71	6.6918	0.000480649	7291, 1350, 9550, 11151, 4697, 1317, 1193, 84102, 79689, 9551, 10396, 288, 6352, 9104, 57380, 533, 1349, 538, 1346, 5777, 1345, 10063, 6769, 1340, 4846, 29988, 7780, 1327, 9296, 55129, 10916, 4891, 7381, 6406, 80228, 10476, 1337, 285195, 7384, 9016, 920, 10268, 9368, 155066, 4704, 51606, 27089, 3357, 3757, 6584, 93129, 26249, 11060, 6622, 10312, 26133, 30061, 114134, 521, 6387, 523, 54946, 2539, …	944	454	9027	1.49546	0.961963	0.0298168	0.940085
GOTERM_MF_FAT	GO:0015077~monovalent inorganic cation transmembrane transporter activity	27	2.54477	0.000496819	9550, 1350, 1340, 4697, 10312, 155066, 1327, 9296, 51606, 27089, 521, 4891, 388662, 7381, 523, 3757, 10476, 533, 1349, 1337, 1346, 526, 1345, 285195, 528, 7384, 527	845	130	8342	2.05038	0.522149	0.0787747	0.821359
GOTERM_BP_FAT	GO:0002694~regulation of leukocyte activation	40	3.77003	0.000523371	4208, 3127, 920, 3111, 5781, 11151, 966, 2934, 8741, 6845, 7301, 1604, 8013, 6352, 3965, 199, 221395, 2207, 3659, 253260, 5777, 3133, 3105, 3635, 11326, 3113, 23729, 5880, 3115, 6622, 972, 79109, 3718, 64223, 7099, 6385, 6777, 4067, 3123, 3122	944	218	9027	1.75459	0.971557	0.0321317	1.02324
GOTERM_MF_FAT	GO:0022804~active transmembrane transporter activity	32	3.01602	0.000528147	117247, 9550, 215, 10952, 10245, 155066, 51606, 10396, 65010, 21, 533, 538, 11309, 6584, 10440, 8402, 1186, 219855, 10312, 10058, 29988, 9296, 114134, 388662, 4891, 523, 28232, 10476, 526, 285195, 528, 527	845	166	8342	1.90307	0.543896	0.0755011	0.87294
GOTERM_BP_FAT	GO:0050801~ion homeostasis	56	5.27804	0.000568695	9550, 5167, 5164, 11151, 1317, 1193, 79689, 288, 65010, 6352, 9104, 533, 538, 5777, 10161, 6648, 10058, 7780, 6358, 3791, 9296, 7879, 4891, 23479, 9709, 285195, 920, 9368, 4682, 155066, 51606, 1604, 3357, 3757, 9777, 26249, 6622, 10312, 30061, 794, 1203, 6387, 523, 7052, 120892, 27102, 2495, 1201, 6915, 29098, 567, 526, 4067, 528, 3934, 527	944	339	9027	1.57965	0.979105	0.0345546	1.11138
GOTERM_BP_FAT	GO:0098771~inorganic ion homeostasis	53	4.99529	0.000569294	9550, 5167, 5164, 11151, 1317, 1193, 79689, 288, 65010, 9104, 6352, 533, 538, 5777, 10161, 6648, 10058, 7780, 6358, 9296, 7879, 4891, 23479, 9709, 285195, 920, 9368, 4682, 155066, 51606, 1604, 3357, 3757, 9777, 6622, 10312, 30061, 794, 6387, 1203, 523, 7052, 120892, 2495, 27102, 1201, 6915, 567, 526, 4067, 528, 3934, 527	944	316	9027	1.60384	0.97919	0.0342841	1.11255
KEGG_PATHWAY	hsa05120:Epithelial cell signaling in Helicobacter pylori infection	16	1.50801	0.000582547	5601, 9550, 5781, 10312, 155066, 3551, 9296, 51606, 6352, 6416, 523, 533, 526, 4067, 528, 527	473	51	3968	2.63185	0.14757	0.0122068	0.764972
GOTERM_BP_FAT	GO:0051251~positive regulation of lymphocyte activation	27	2.54477	0.000637137	4208, 920, 3127, 5781, 11151, 966, 8741, 1604, 6352, 3965, 199, 253260, 5777, 3133, 3105, 3635, 3113, 3115, 972, 79109, 3718, 64223, 7099, 6777, 4067, 3123, 3122	944	128	9027	2.01709	0.986884	0.0379566	1.24434
GOTERM_BP_FAT	GO:0034341~response to interferon-gamma	21	1.97926	0.000698118	10346, 4360, 3113, 6770, 3127, 3115, 2634, 6622, 6358, 65010, 10437, 6352, 3965, 199, 3659, 567, 3134, 3133, 3105, 3123, 3122	944	89	9027	2.25632	0.991338	0.0411545	1.36267
GOTERM_CC_FAT	GO:0031902~late endosome membrane	22	2.07352	0.000741844	3127, 55697, 27243, 128866, 55317, 27183, 6845, 114883, 55207, 7879, 25978, 93343, 4891, 55823, 9482, 3920, 64089, 55529, 285195, 83547, 3123, 3122	907	93	8395	2.18954	0.465063	0.0144437	1.14044
GOTERM_BP_FAT	GO:0031294~lymphocyte costimulation	12	1.13101	0.000782534	3113, 3127, 920, 64223, 3115, 5781, 253260, 5777, 79109, 4067, 3123, 3122	944	36	9027	3.1875	0.995123	0.0456223	1.52624
GOTERM_BP_FAT	GO:0031295~T cell costimulation	12	1.13101	0.000782534	3113, 3127, 920, 64223, 3115, 5781, 253260, 5777, 79109, 4067, 3123, 3122	944	36	9027	3.1875	0.995123	0.0456223	1.52624
GOTERM_MF_FAT	GO:0048037~cofactor binding	35	3.29877	0.000869076	3420, 2582, 35, 18, 4704, 6821, 55163, 37, 38, 374291, 1806, 4967, 6392, 197257, 3417, 55526, 84869, 11212, 4846, 55304, 2806, 51741, 2639, 2805, 8804, 6389, 8802, 2539, 5834, 80219, 93058, 80724, 1536, 3421, 9131	845	193	8342	1.79029	0.725281	0.11082	1.43263
GOTERM_MF_FAT	GO:0008324~cation transmembrane transporter activity	43	4.05278	0.000880284	1350, 9550, 4697, 1317, 155066, 84102, 51606, 27089, 10396, 3757, 57380, 533, 538, 6584, 1349, 1346, 93129, 1345, 23390, 1340, 26133, 10312, 29988, 7780, 30061, 1327, 9296, 55129, 114134, 521, 388662, 4891, 7381, 523, 54946, 80228, 10476, 1337, 526, 285195, 528, 7384, 527	845	254	8342	1.67128	0.729823	0.10332	1.45098
GOTERM_MF_FAT	GO:0044769~ATPase activity, coupled to transmembrane movement of ions, rotational mechanism	10	0.942507	0.00092775	523, 10312, 10476, 533, 155066, 9296, 526, 528, 51606, 527	845	27	8342	3.65637	0.748239	0.100664	1.52865
GOTERM_BP_FAT	GO:0048871~multicellular organismal homeostasis	29	2.73327	0.000931062	1435, 5781, 10891, 11151, 18, 37, 3315, 8013, 221395, 23371, 84059, 6584, 3635, 6662, 1280, 5880, 201163, 582, 30061, 128866, 2778, 272, 282809, 7879, 4891, 8195, 7099, 567, 4069	944	145	9027	1.9125	0.998225	0.0535903	1.81342
GOTERM_BP_FAT	GO:0030595~leukocyte chemotaxis	18	1.69651	0.0009559	5880, 5919, 1435, 4354, 11151, 6358, 972, 57580, 80270, 6387, 6352, 3965, 3689, 199, 2207, 2350, 4067, 708	944	72	9027	2.39062	0.998501	0.0545198	1.86136
GOTERM_CC_FAT	GO:0030133~transport vesicle	41	3.86428	0.000956917	3127, 9367, 22818, 966, 79666, 9627, 6809, 1861, 6845, 8674, 1604, 202915, 538, 5868, 9144, 3134, 3133, 3105, 3113, 6645, 2157, 3115, 2801, 6622, 10059, 51014, 29988, 30061, 26958, 6854, 2778, 6272, 1759, 972, 388662, 29058, 120892, 1201, 567, 3123, 3122	907	225	8395	1.68661	0.553835	0.0181752	1.46879
GOTERM_BP_FAT	GO:0044712~single-organism catabolic process	80	7.54006	0.000971228	22875, 7291, 10999, 5167, 10891, 5334, 2582, 10952, 35, 645, 1861, 83875, 51005, 51171, 2744, 37, 1576, 38, 747, 2109, 4967, 10585, 8975, 1280, 4846, 197322, 2806, 2717, 501, 272, 7879, 258010, 2805, 6609, 10005, 9709, 5834, 11001, 2760, 283927, 4357, 10007, 80724, 219743, 669, 215, 5255, 18, 217, 10327, 3028, 83594, 1806, 5208, 3417, 55526, 2170, 26232, 221, 10411, 5051, 5096, 130589, 26090, 226…	944	538	9027	1.42193	0.99865	0.0549098	1.89094
GOTERM_BP_FAT	GO:0071621~granulocyte chemotaxis	11	1.03676	0.00111111	6352, 5880, 1435, 5919, 3689, 4354, 6358, 2207, 708, 972, 57580	944	32	9027	3.28711	0.999479	0.0620565	2.16047
GOTERM_BP_FAT	GO:0098662~inorganic cation transmembrane transport	48	4.52403	0.00112606	9550, 1350, 11151, 4697, 9368, 1317, 1193, 155066, 9551, 51606, 27089, 288, 9104, 3357, 3757, 533, 538, 1349, 1346, 93129, 5777, 1345, 6769, 11060, 1340, 6622, 26133, 10312, 7780, 30061, 1327, 9296, 521, 4891, 7381, 523, 2539, 80228, 10476, 29098, 1337, 7531, 526, 4067, 285195, 528, 7384, 527	944	287	9027	1.5993	0.999529	0.0623536	2.18923
GOTERM_BP_FAT	GO:0055080~cation homeostasis	51	4.80679	0.00114157	9550, 5164, 11151, 1317, 1193, 79689, 288, 65010, 9104, 6352, 533, 538, 5777, 10161, 6648, 10058, 7780, 6358, 9296, 7879, 4891, 23479, 9709, 285195, 920, 4682, 155066, 51606, 1604, 3357, 3757, 9777, 6622, 10312, 30061, 794, 6387, 1203, 523, 7052, 120892, 2495, 27102, 1201, 6915, 567, 526, 4067, 528, 3934, 527	944	310	9027	1.57319	0.999577	0.0626755	2.21906
GOTERM_BP_FAT	GO:1903543~positive regulation of exosomal secretion	7	0.659755	0.00114932	10015, 6386, 6385, 27243, 27183, 8027, 7879	944	13	9027	5.14904	0.999598	0.0625827	2.23397
GOTERM_BP_FAT	GO:0071622~regulation of granulocyte chemotaxis	7	0.659755	0.00114932	6352, 5880, 1435, 5919, 4354, 708, 972	944	13	9027	5.14904	0.999598	0.0625827	2.23397
GOTERM_MF_FAT	GO:0022890~inorganic cation transmembrane transporter activity	37	3.48728	0.00123793	1350, 9550, 4697, 1317, 155066, 84102, 27089, 51606, 3757, 57380, 533, 538, 1349, 1346, 93129, 1345, 23390, 1340, 26133, 10312, 7780, 30061, 1327, 9296, 521, 388662, 4891, 7381, 523, 80228, 10476, 1337, 526, 285195, 528, 7384, 527	845	212	8342	1.72298	0.841295	0.123202	2.03482
GOTERM_BP_FAT	GO:0098660~inorganic ion transmembrane transport	52	4.90104	0.00124803	1350, 9550, 4697, 11151, 1317, 1193, 9551, 288, 65010, 9104, 533, 1349, 538, 1346, 5777, 1345, 6769, 1186, 219855, 1340, 7780, 1327, 9296, 55129, 4891, 7381, 80228, 10476, 1337, 285195, 7384, 9368, 155066, 51606, 27089, 3357, 3757, 93129, 11060, 6622, 10312, 26133, 30061, 521, 523, 2539, 29098, 7531, 526, 4067, 528, 527	944	319	9027	1.55878	0.999795	0.0672383	2.42361
KEGG_PATHWAY	hsa05310:Asthma	7	0.659755	0.00135012	3113, 3127, 3111, 3115, 2207, 3123, 3122	473	12	3968	4.89359	0.309392	0.0260951	1.76465
GOTERM_BP_FAT	GO:0034220~ion transmembrane transport	67	6.3148	0.00145991	4208, 1350, 9550, 10891, 11151, 4697, 1317, 1193, 84102, 9551, 10396, 288, 65010, 9104, 533, 1349, 538, 1346, 5777, 1345, 6769, 1186, 1340, 219855, 133418, 2892, 7780, 1327, 9296, 55129, 4891, 7381, 80228, 10476, 84230, 1337, 285195, 80131, 7384, 1741, 9368, 155066, 27089, 51606, 3357, 3757, 6584, 93129, 11060, 6622, 10312, 26133, 30061, 81831, 521, 523, 54946, 2539, 28962, 51185, 29098, 7531, 51…	944	440	9027	1.45611	0.999952	0.0775938	2.82951
GOTERM_MF_FAT	GO:0019829~cation-transporting ATPase activity	13	1.22526	0.00160887	9550, 523, 10312, 10476, 533, 155066, 538, 9296, 526, 528, 51606, 527, 10396	845	46	8342	2.78997	0.908618	0.147442	2.63693
GOTERM_BP_FAT	GO:0015988~energy coupled proton transmembrane transport, against electrochemical gradient	9	0.848256	0.00160952	523, 10312, 533, 155066, 9296, 526, 528, 51606, 527	944	23	9027	3.74185	0.999983	0.0845459	3.11513
GOTERM_BP_FAT	GO:0015991~ATP hydrolysis coupled proton transport	9	0.848256	0.00160952	523, 10312, 533, 155066, 9296, 526, 528, 51606, 527	944	23	9027	3.74185	0.999983	0.0845459	3.11513
GOTERM_CC_FAT	GO:0033180~proton-transporting V-type ATPase, V1 domain	5	0.471254	0.00169045	523, 9296, 526, 528, 51606	907	6	8395	7.71316	0.759794	0.0311976	2.58102
KEGG_PATHWAY	hsa05110:Vibrio cholerae infection	13	1.22526	0.00169284	9550, 10312, 10952, 5578, 155066, 2778, 9296, 51606, 523, 533, 526, 528, 527	473	40	3968	2.72643	0.371382	0.0304747	2.208
KEGG_PATHWAY	hsa04640:Hematopoietic cell lineage	11	1.03676	0.00169399	1436, 929, 3127, 920, 1435, 3675, 4254, 966, 3123, 1604, 3122	473	30	3968	3.07597	0.371579	0.0286167	2.20948
GOTERM_BP_FAT	GO:0006123~mitochondrial electron transport, cytochrome c to oxygen	7	0.659755	0.00183481	1350, 1340, 4697, 1349, 1327, 1337, 1345	944	14	9027	4.78125	0.999996	0.095077	3.54375
KEGG_PATHWAY	hsa04940:Type I diabetes mellitus	9	0.848256	0.00187491	3113, 3127, 3111, 3115, 3134, 3133, 3105, 3123, 3122	473	21	3968	3.59529	0.402026	0.0297946	2.44278
GOTERM_BP_FAT	GO:0051249~regulation of lymphocyte activation	34	3.20452	0.00189197	4208, 920, 3127, 3111, 5781, 11151, 966, 2934, 8741, 7301, 1604, 6352, 3965, 199, 3659, 253260, 5777, 3133, 3105, 3635, 11326, 3113, 5880, 3115, 972, 79109, 3718, 64223, 7099, 6385, 6777, 4067, 3123, 3122	944	188	9027	1.72939	0.999997	0.0971539	3.65222
GOTERM_MF_FAT	GO:0038023~signaling receptor activity	50	4.71254	0.00191569	3111, 10990, 23554, 7301, 190, 8013, 2207, 2101, 5777, 2202, 10161, 4360, 1944, 2892, 3791, 23643, 2324, 972, 27077, 929, 2516, 3689, 5786, 3587, 5787, 9052, 6653, 920, 1436, 10268, 5618, 57556, 92737, 3357, 3757, 221395, 84059, 269, 3113, 3115, 93, 6272, 5467, 2825, 7099, 6385, 8431, 6915, 3123, 3122	845	320	8342	1.54253	0.942124	0.163133	3.13232
GOTERM_BP_FAT	GO:0055082~cellular chemical homeostasis	56	5.27804	0.00195704	4208, 6770, 9550, 5167, 10891, 11151, 1317, 1193, 65010, 9104, 6352, 533, 538, 23038, 5777, 10161, 10058, 7780, 6358, 9296, 7879, 4891, 23479, 9709, 4830, 2021, 285195, 920, 3127, 2030, 9368, 4682, 155066, 51606, 1604, 3357, 29085, 9777, 6622, 10312, 30061, 794, 1203, 6387, 523, 7052, 120892, 2495, 1201, 6915, 526, 4067, 528, 3123, 3934, 527	944	357	9027	1.5	0.999998	0.0995756	3.77554
GOTERM_BP_FAT	GO:0098581~detection of external biotic stimulus	6	0.565504	0.00197888	3127, 7099, 54209, 23643, 3105, 3123	944	10	9027	5.7375	0.999999	0.0998844	3.8169
GOTERM_CC_FAT	GO:0070069~cytochrome complex	9	0.848256	0.0019865	1350, 7381, 4697, 1349, 1327, 1337, 7385, 27089, 7384	907	23	8395	3.62183	0.812933	0.035785	3.02656
GOTERM_CC_FAT	GO:0098553~lumenal side of endoplasmic reticulum membrane	9	0.848256	0.0019865	3113, 3127, 3115, 3134, 972, 3133, 3105, 3123, 3122	907	23	8395	3.62183	0.812933	0.035785	3.02656
GOTERM_CC_FAT	GO:0071556~integral component of lumenal side of endoplasmic reticulum membrane	9	0.848256	0.0019865	3113, 3127, 3115, 3134, 972, 3133, 3105, 3123, 3122	907	23	8395	3.62183	0.812933	0.035785	3.02656
GOTERM_BP_FAT	GO:0042181~ketone biosynthetic process	10	0.942507	0.00206734	6770, 10229, 56997, 10891, 80219, 84274, 4704, 93058, 51117, 57017	944	29	9027	3.29741	0.999999	0.103349	3.98425
GOTERM_BP_FAT	GO:0007159~leukocyte cell-cell adhesion	40	3.77003	0.002082	3127, 920, 3111, 5781, 5618, 11151, 966, 2934, 57580, 1604, 8013, 6352, 3965, 199, 2207, 538, 3659, 253260, 5777, 3133, 3105, 5699, 11326, 3113, 5880, 3115, 972, 79109, 3718, 6387, 64223, 3689, 6385, 6777, 2113, 567, 4067, 3123, 896, 3122	944	234	9027	1.63462	0.999999	0.103286	4.01196
GOTERM_BP_FAT	GO:0006873~cellular ion homeostasis	46	4.33553	0.00208927	920, 9550, 5167, 9368, 11151, 1317, 4682, 1193, 155066, 51606, 1604, 65010, 6352, 9104, 3357, 533, 9777, 538, 5777, 10161, 6622, 10312, 10058, 7780, 6358, 30061, 9296, 794, 7879, 1203, 4891, 6387, 23479, 523, 7052, 9709, 120892, 2495, 1201, 6915, 526, 4067, 285195, 528, 3934, 527	944	280	9027	1.57098	0.999999	0.102879	4.02571
GOTERM_BP_FAT	GO:0016337~single organismal cell-cell adhesion	57	5.37229	0.00209098	3111, 5781, 11151, 5578, 5912, 7301, 10398, 57580, 8013, 288, 6352, 3965, 199, 2207, 253260, 538, 6614, 5777, 1829, 3105, 11326, 6662, 5880, 972, 3718, 64223, 3689, 6777, 2113, 1495, 920, 3127, 4685, 5618, 966, 2934, 18, 3315, 1604, 84059, 7373, 3659, 3133, 5699, 3113, 3115, 2778, 79109, 6387, 1056, 6385, 567, 4067, 3123, 2039, 896, 3122	944	366	9027	1.48924	0.999999	0.10222	4.02892
KEGG_PATHWAY	hsa04966:Collecting duct acid secretion	8	0.754006	0.00214997	9550, 523, 10312, 155066, 9296, 526, 528, 527	473	17	3968	3.94777	0.445521	0.0322317	2.79647
KEGG_PATHWAY	hsa04672:Intestinal immune network for IgA production	8	0.754006	0.00214997	3113, 6387, 3127, 3111, 3115, 8741, 3123, 3122	473	17	3968	3.94777	0.445521	0.0322317	2.79647
GOTERM_BP_FAT	GO:0002455~humoral immune response mediated by circulating immunoglobulin	9	0.848256	0.00219623	3127, 718, 713, 712, 714, 5777, 708, 3123, 1604	944	24	9027	3.58594	1	0.106324	4.2276
GOTERM_CC_FAT	GO:0098552~side of membrane	38	3.58153	0.00223058	920, 3127, 966, 84299, 214, 23011, 3675, 2207, 1540, 5868, 3134, 3133, 3105, 3113, 3115, 128866, 3551, 2778, 972, 3718, 929, 6387, 5997, 5476, 112574, 10495, 2539, 7099, 120892, 2760, 2350, 52, 567, 4067, 2214, 3123, 1837, 3122	907	213	8395	1.65127	0.847788	0.0392612	3.39247
GOTERM_CC_FAT	GO:0030139~endocytic vesicle	32	3.01602	0.00228354	3127, 9367, 10890, 11151, 155066, 6845, 533, 3920, 5868, 3134, 3133, 3105, 3113, 5880, 3115, 4846, 8976, 10312, 84440, 9779, 2892, 972, 7879, 23166, 9135, 55823, 567, 1536, 83547, 3123, 3122, 527	907	170	8395	1.74227	0.854449	0.0393552	3.47169
GOTERM_BP_FAT	GO:0001894~tissue homeostasis	20	1.88501	0.00235264	1280, 5880, 1435, 5781, 11151, 582, 128866, 2778, 282809, 7879, 3315, 8195, 7099, 221395, 84059, 6584, 567, 6662, 4069, 3635	944	91	9027	2.10165	1	0.112661	4.52211
GOTERM_MF_FAT	GO:0060089~molecular transducer activity	64	6.03205	0.00242444	3111, 5167, 10990, 23554, 9862, 7301, 190, 8013, 2207, 2101, 5777, 2202, 10161, 4360, 1944, 55697, 2892, 64129, 3791, 23643, 2324, 972, 27077, 23166, 929, 2516, 6404, 3689, 5786, 3587, 5787, 9052, 3959, 6653, 920, 1436, 1741, 10268, 5618, 57556, 92737, 1604, 3357, 3757, 221395, 84059, 269, 3113, 3115, 93, 30061, 6272, 5467, 2825, 7099, 1056, 54209, 6385, 8431, 6915, 2350, 7095, 3123, 3122	845	439	8342	1.43923	0.972869	0.191182	3.94854
GOTERM_MF_FAT	GO:0004872~receptor activity	64	6.03205	0.00242444	3111, 5167, 10990, 23554, 9862, 7301, 190, 8013, 2207, 2101, 5777, 2202, 10161, 4360, 1944, 55697, 2892, 64129, 3791, 23643, 2324, 972, 27077, 23166, 929, 2516, 6404, 3689, 5786, 3587, 5787, 9052, 3959, 6653, 920, 1436, 1741, 10268, 5618, 57556, 92737, 1604, 3357, 3757, 221395, 84059, 269, 3113, 3115, 93, 30061, 6272, 5467, 2825, 7099, 1056, 54209, 6385, 8431, 6915, 2350, 7095, 3123, 3122	845	439	8342	1.43923	0.972869	0.191182	3.94854
GOTERM_BP_FAT	GO:0006914~autophagy	56	5.27804	0.00251268	10346, 9550, 10891, 7942, 533, 8975, 8878, 65018, 3920, 26073, 2801, 10059, 9779, 201163, 3791, 10533, 8027, 7879, 258010, 25978, 93343, 9821, 64223, 9868, 11337, 823, 55062, 826, 155066, 27183, 6845, 51606, 29100, 84749, 3357, 4534, 11345, 5868, 65991, 6622, 10312, 27243, 128866, 132671, 5476, 523, 55823, 120892, 1201, 9842, 79443, 84971, 58528, 526, 528, 527	944	361	9027	1.48338	1	0.119023	4.82257
GOTERM_MF_FAT	GO:0016676~oxidoreductase activity, acting on a heme group of donors, oxygen as acceptor	8	0.754006	0.00251708	1350, 1340, 4697, 1349, 1346, 1327, 1337, 1345	845	20	8342	3.94888	0.976367	0.187843	4.09648
GOTERM_MF_FAT	GO:0042605~peptide antigen binding	8	0.754006	0.00251708	3113, 3127, 3115, 3134, 3133, 3105, 3123, 3122	845	20	8342	3.94888	0.976367	0.187843	4.09648
GOTERM_MF_FAT	GO:0015002~heme-copper terminal oxidase activity	8	0.754006	0.00251708	1350, 1340, 4697, 1349, 1346, 1327, 1337, 1345	845	20	8342	3.94888	0.976367	0.187843	4.09648
GOTERM_MF_FAT	GO:0004129~cytochrome-c oxidase activity	8	0.754006	0.00251708	1350, 1340, 4697, 1349, 1346, 1327, 1337, 1345	845	20	8342	3.94888	0.976367	0.187843	4.09648
GOTERM_CC_FAT	GO:0005765~lysosomal membrane	41	3.86428	0.00281666	2647, 3127, 3111, 9550, 5167, 968, 55317, 6845, 51606, 80208, 114876, 3920, 7805, 55529, 3113, 1186, 223082, 3115, 10312, 29988, 7780, 6272, 55207, 972, 7879, 1203, 4891, 5476, 523, 55823, 28962, 9482, 1201, 9842, 55652, 526, 528, 83547, 3123, 527, 3122	907	238	8395	1.59448	0.907245	0.0473679	4.2658
GOTERM_CC_FAT	GO:0098852~lytic vacuole membrane	41	3.86428	0.00281666	2647, 3127, 3111, 9550, 5167, 968, 55317, 6845, 51606, 80208, 114876, 3920, 7805, 55529, 3113, 1186, 223082, 3115, 10312, 29988, 7780, 6272, 55207, 972, 7879, 1203, 4891, 5476, 523, 55823, 28962, 9482, 1201, 9842, 55652, 526, 528, 83547, 3123, 527, 3122	907	238	8395	1.59448	0.907245	0.0473679	4.2658
GOTERM_CC_FAT	GO:0016023~cytoplasmic, membrane-bounded vesicle	104	9.80207	0.00295646	10890, 11151, 682, 8674, 533, 538, 3920, 6498, 9144, 2157, 29988, 51014, 6293, 79890, 7879, 6609, 7076, 2162, 11336, 1495, 9052, 3127, 9367, 55062, 5147, 9627, 6809, 23011, 21, 10015, 149951, 3134, 3133, 23390, 3113, 3115, 10312, 53344, 226, 30061, 2778, 1114, 6272, 23433, 112574, 6386, 397, 7531, 526, 83547, 3123, 527, 3122, 5919, 1861, 55275, 10396, 65010, 202915, 10585, 3105, 6645, 90203, 2230…	907	738	8395	1.30434	0.917585	0.0486943	4.47303
KEGG_PATHWAY	hsa00020:Citrate cycle (TCA cycle)	10	0.942507	0.00380277	3420, 6389, 6392, 4967, 8802, 8801, 3417, 5160, 3421, 50	473	28	3968	2.99607	0.647937	0.0534623	4.89694
Negative Correlations
GOTERM_BP_FAT	GO:0051276~chromosome organization	148	14.1491	3.88515e-12	55746, 6018, 3720, 29127, 8535, 54107, 332, 8125, 10541, 6421, 10615, 51176, 6418, 1386, 2956, 10714, 51773, 10155, 11091, 3150, 26155, 58499, 79892, 9918, 51366, 79813, 11004, 8726, 7175, 1810, 8019, 55055, 5934, 84893, 23310, 9646, 9055, 10728, 4609, 11335, 7517, 10524, 55723, 11130, 113130, 22992, 1788, 81565, 54934, 144108, 55165, 7422, 9219, 5347, 7520, 26147, 64708, 4173, 4172, 23592, 4175,…	939	819	9027	1.73722	2.58904e-08	2.58904e-08	7.61716e-09
GOTERM_CC_FAT	GO:0005654~nucleoplasm	329	31.4532	6.23728e-11	1196, 4796, 1479, 84271, 3720, 29127, 23513, 6621, 23514, 63922, 54107, 332, 57205, 10992, 8125, 10482, 8013, 11329, 10615, 51176, 6612, 2956, 10714, 51773, 11091, 6618, 116028, 84285, 23, 9877, 51366, 79813, 4605, 1719, 8726, 7073, 7175, 1810, 56928, 6778, 11080, 10728, 4609, 55215, 54881, 55723, 51593, 11340, 403341, 1432, 51496, 1454, 57228, 10087, 5612, 10730, 1997, 23294, 5347, 2972, 22926, …	875	2350	8395	1.3432	5.2705e-08	5.2705e-08	9.64307e-08
GOTERM_BP_FAT	GO:0051301~cell division	87	8.3174	2.06688e-10	84930, 7846, 64151, 29127, 332, 23172, 22974, 9700, 983, 8324, 27338, 51176, 10615, 9493, 3925, 9798, 259266, 8872, 3619, 10807, 11140, 79892, 9918, 7443, 10376, 11004, 7073, 7175, 9585, 10096, 5499, 55055, 23310, 9055, 4609, 2119, 55038, 10460, 11130, 11200, 5413, 113130, 219771, 6188, 6790, 55165, 90417, 7422, 57787, 83461, 5347, 85440, 10112, 55660, 22897, 55143, 4174, 11065, 890, 699, 3833, 3…	939	418	9027	2.00088	1.37737e-06	6.88684e-07	4.05232e-07
GOTERM_CC_FAT	GO:0044427~chromosomal part	107	10.2294	3.60607e-10	4796, 55746, 332, 54107, 63922, 79809, 6421, 10615, 1386, 6612, 2956, 23076, 10714, 10155, 3150, 79892, 9918, 4605, 11004, 8726, 7175, 55055, 23310, 84893, 6778, 10728, 9646, 11335, 7517, 55723, 10524, 11130, 113130, 1788, 81565, 9219, 5347, 7520, 4173, 4172, 4175, 4174, 5424, 4176, 699, 4436, 1063, 3014, 53615, 9183, 85456, 5814, 23435, 5810, 9184, 891, 10189, 23030, 6599, 64151, 10856, 57820, 6…	875	563	8395	1.82343	3.04713e-07	1.52357e-07	5.57513e-07
GOTERM_BP_FAT	GO:0000280~nuclear division	82	7.83939	7.50325e-10	84930, 64151, 29127, 332, 23172, 22974, 57820, 9700, 983, 27338, 10615, 9493, 4659, 2956, 259266, 55719, 3619, 79892, 9918, 7443, 9702, 4605, 11004, 7175, 9585, 10096, 55055, 23310, 9055, 10460, 23636, 7517, 9319, 11130, 11200, 113130, 9221, 6188, 6790, 81565, 55165, 90417, 57787, 83461, 5347, 7272, 22897, 55143, 23592, 11065, 55872, 890, 699, 329, 80198, 9088, 4436, 3833, 3832, 7153, 10419, 7465…	939	394	9027	2.00076	5.00015e-06	1.66672e-06	1.47109e-06
GOTERM_BP_FAT	GO:0006259~DNA metabolic process	123	11.7591	8.49892e-10	5436, 4796, 6018, 23514, 63922, 54107, 7298, 51008, 6421, 10926, 51176, 64210, 6418, 6612, 2956, 10714, 10155, 116028, 3150, 81620, 55031, 79892, 51366, 79813, 7175, 84893, 6778, 4931, 10728, 4609, 55215, 54881, 7517, 10524, 1454, 113130, 9768, 22992, 1788, 6188, 9219, 4784, 6749, 29089, 7520, 2176, 64708, 51514, 4173, 5428, 4172, 4175, 4174, 5424, 4176, 3838, 4436, 10419, 2305, 1063, 3014, 53615…	939	689	9027	1.71618	5.66367e-06	1.41592e-06	1.6663e-06
GOTERM_CC_FAT	GO:0005694~chromosome	116	11.0899	1.51165e-09	4796, 55746, 23514, 332, 54107, 63922, 79809, 6421, 10615, 1386, 6612, 2956, 23076, 10714, 10155, 3150, 79892, 9918, 79813, 4605, 11004, 8726, 7175, 55055, 23310, 84893, 6778, 10728, 9646, 11335, 7517, 10524, 55723, 11130, 113130, 1788, 81565, 9219, 5347, 7520, 6749, 51514, 4173, 4172, 4175, 4174, 5424, 4176, 699, 329, 4436, 1063, 3014, 53615, 9183, 85456, 5814, 23435, 5810, 9184, 891, 10189, 230…	875	643	8395	1.73085	1.27734e-06	4.25781e-07	2.33707e-06
GOTERM_BP_FAT	GO:0006974~cellular response to DNA damage stimulus	110	10.5163	3.73514e-09	5436, 4796, 84930, 23514, 51008, 6421, 64210, 1386, 6612, 2956, 10714, 10155, 116028, 3150, 55031, 51366, 5934, 84893, 112399, 4609, 55215, 7517, 10524, 4776, 1432, 1454, 113130, 9768, 22992, 6188, 5347, 29089, 7520, 6749, 2176, 64708, 79624, 51514, 10413, 5428, 890, 5424, 4176, 4436, 2305, 54541, 3014, 9232, 85456, 9766, 5810, 26471, 891, 5433, 10189, 2968, 571, 7027, 10856, 10397, 6591, 983, 11…	939	608	9027	1.73927	2.48907e-05	4.97819e-06	7.32313e-06
GOTERM_BP_FAT	GO:0048285~organelle fission	84	8.03059	5.38437e-09	84930, 64151, 29127, 332, 23172, 22974, 57820, 9700, 983, 27338, 10615, 54708, 9493, 4659, 2956, 259266, 55719, 3619, 79892, 9918, 1759, 7443, 9702, 4605, 11004, 7175, 9585, 10096, 55055, 23310, 9055, 10460, 23636, 7517, 9319, 11130, 11200, 113130, 9221, 6188, 6790, 81565, 55165, 90417, 57787, 83461, 5347, 7272, 22897, 55143, 23592, 11065, 55872, 890, 699, 329, 80198, 9088, 4436, 3833, 3832, 7153…	939	424	9027	1.90455	3.58808e-05	5.98023e-06	1.05566e-05
GOTERM_BP_FAT	GO:0007067~mitotic nuclear division	70	6.69216	6.14806e-09	84930, 64151, 29127, 23172, 332, 22974, 9700, 983, 27338, 10615, 9493, 4659, 259266, 55719, 3619, 79892, 9918, 7443, 9702, 4605, 11004, 7175, 9585, 55055, 23310, 9055, 10460, 23636, 7517, 11130, 11200, 113130, 9221, 6188, 6790, 81565, 55165, 90417, 57787, 83461, 5347, 7272, 22897, 55143, 11065, 55872, 890, 699, 329, 9088, 3833, 3832, 7465, 1063, 257364, 11113, 5901, 54443, 9232, 9183, 80346, 9133…	939	329	9027	2.04541	4.09698e-05	5.85294e-06	1.20539e-05
GOTERM_BP_FAT	GO:0098813~nuclear chromosome segregation	48	4.58891	7.31092e-09	7517, 10460, 9319, 11130, 55746, 64151, 29127, 113130, 332, 23172, 57820, 6421, 9700, 81565, 55165, 90417, 10615, 9493, 5347, 7272, 55719, 55143, 23592, 3619, 11065, 699, 80198, 3833, 7153, 79892, 1063, 9918, 9232, 9183, 9702, 11004, 2237, 7175, 10096, 10459, 991, 9184, 55055, 23310, 891, 23047, 9055, 10783	939	189	9027	2.4415	4.87188e-05	6.08998e-06	1.43338e-05
GOTERM_BP_FAT	GO:1903047~mitotic cell cycle process	121	11.5679	9.70391e-09	84930, 55746, 23511, 29127, 332, 7298, 22974, 10926, 6868, 27338, 10615, 1386, 3925, 677, 81620, 55031, 79892, 9918, 5546, 4605, 1719, 11004, 7175, 55055, 5934, 23310, 9055, 23636, 55215, 7517, 11130, 1454, 113130, 128239, 9221, 6188, 81565, 55165, 83461, 5347, 10112, 58480, 4173, 4172, 4175, 4174, 55872, 890, 4176, 699, 329, 4436, 3833, 3832, 2305, 257364, 1063, 9232, 9183, 85456, 1781, 991, 918…	939	701	9027	1.65938	6.46648e-05	7.18518e-06	1.90255e-05
GOTERM_BP_FAT	GO:0022402~cell cycle process	157	15.0096	1.19366e-08	84930, 55746, 23511, 29127, 332, 7298, 22974, 6421, 10926, 6868, 27338, 10615, 51176, 3925, 1386, 2956, 8872, 677, 10807, 81620, 55031, 79892, 9918, 5546, 1719, 4605, 11004, 7175, 10096, 55055, 5934, 23310, 9055, 4609, 7517, 23636, 55215, 11130, 1432, 1454, 113130, 5413, 128239, 9221, 6188, 81565, 55165, 5565, 83461, 5347, 10112, 55660, 58480, 51514, 4173, 4172, 23592, 4175, 4174, 890, 55872, 417…	939	984	9027	1.53385	7.95427e-05	7.95455e-06	2.3403e-05
GOTERM_BP_FAT	GO:0000278~mitotic cell cycle	128	12.2371	1.30272e-08	84930, 55746, 23511, 23513, 29127, 332, 7298, 22974, 10926, 6868, 27338, 10615, 1386, 3925, 677, 81620, 55031, 79892, 9918, 5546, 1719, 4605, 11004, 7175, 55055, 5934, 23310, 9055, 23636, 55215, 7517, 11130, 1454, 113130, 128239, 9221, 1788, 6188, 81565, 55165, 83461, 5347, 10112, 58480, 4173, 4172, 4175, 4174, 55872, 890, 4176, 699, 329, 4436, 3833, 3832, 10419, 2305, 257364, 1063, 9232, 9183, 8…	939	758	9027	1.62337	8.68096e-05	7.89209e-06	2.55412e-05
GOTERM_BP_FAT	GO:0007049~cell cycle	182	17.3996	3.70103e-08	84930, 55746, 23511, 23513, 29127, 63922, 332, 7298, 22974, 6422, 6421, 8013, 10926, 6868, 2342, 27338, 10615, 51176, 3925, 1386, 7803, 2956, 6494, 8872, 677, 10807, 81620, 55031, 11140, 79892, 9918, 5546, 1719, 4605, 11004, 7175, 10096, 55055, 5934, 23310, 9055, 4609, 7517, 23636, 55215, 11130, 1432, 1454, 113130, 5413, 128239, 9221, 6188, 1788, 81565, 55165, 1841, 5565, 83461, 5347, 10112, 5566…	939	1203	9027	1.4544	0.000246606	2.05528e-05	7.25624e-05
GOTERM_BP_FAT	GO:0007059~chromosome segregation	52	4.97132	4.65728e-08	55746, 64151, 29127, 23172, 332, 57820, 6421, 9700, 64210, 10615, 9493, 55719, 3619, 79892, 9918, 9702, 11004, 7175, 10096, 55055, 23310, 9055, 10460, 7517, 9319, 11130, 113130, 6188, 81565, 55165, 90417, 5347, 7272, 55143, 23592, 11065, 699, 80198, 3833, 3832, 7153, 1063, 9232, 9183, 2237, 10459, 9184, 991, 23047, 891, 10783, 998	939	225	9027	2.22177	0.000310313	2.38737e-05	9.13107e-05
GOTERM_BP_FAT	GO:0006260~DNA replication	50	4.78011	7.14983e-08	4796, 54107, 63922, 983, 11198, 10926, 6418, 10714, 50485, 116028, 81620, 5883, 22944, 5983, 51053, 79892, 9401, 84893, 10432, 54881, 56652, 1602, 10524, 11200, 6240, 3508, 9768, 6241, 11177, 4784, 6749, 51514, 4173, 10038, 5428, 4172, 4175, 10036, 4174, 5424, 4176, 80198, 9837, 7153, 23560, 2237, 5810, 10189, 142, 998	939	215	9027	2.23568	0.000476351	3.40326e-05	0.00014018
GOTERM_BP_FAT	GO:0051983~regulation of chromosome segregation	24	2.29446	2.0692e-07	7517, 10460, 11065, 699, 29127, 113130, 1063, 6421, 9700, 9183, 90417, 11004, 2237, 7175, 10459, 4288, 10615, 9184, 5347, 891, 7272, 10783, 998, 55719	939	69	9027	3.3438	0.00137797	9.19236e-05	0.000405687
GOTERM_BP_FAT	GO:0000819~sister chromatid segregation	41	3.91969	2.86572e-07	7517, 10460, 11130, 55746, 64151, 29127, 113130, 332, 6421, 9700, 81565, 55165, 90417, 10615, 9493, 5347, 7272, 55719, 55143, 3619, 11065, 699, 3833, 7153, 79892, 1063, 9918, 9183, 9702, 11004, 2237, 7175, 10459, 9184, 991, 55055, 23310, 23047, 891, 9055, 10783	939	167	9027	2.36018	0.00190789	0.00011935	0.000561851
GOTERM_CC_FAT	GO:0000228~nuclear chromosome	70	6.69216	2.99511e-07	4796, 23030, 6599, 10856, 23514, 54107, 332, 79809, 6591, 57820, 983, 6929, 57332, 2956, 10714, 50485, 10155, 3619, 5883, 79892, 6256, 84787, 9918, 5977, 8726, 5499, 4088, 23028, 23310, 6778, 4084, 4087, 6934, 11335, 7517, 10524, 55723, 113130, 1788, 6790, 9219, 84365, 5347, 7520, 8289, 8520, 57459, 26012, 4173, 4172, 4175, 4174, 10036, 4176, 699, 5424, 8507, 4436, 9837, 7153, 3014, 53615, 85456,…	875	361	8395	1.86039	0.000253055	6.32697e-05	0.000463054
GOTERM_CC_FAT	GO:0098687~chromosomal region	53	5.06692	3.33446e-07	23030, 55746, 332, 983, 10615, 6612, 4659, 3619, 84444, 84787, 9918, 11004, 7175, 5499, 55055, 23310, 23028, 10728, 11335, 7517, 11200, 11130, 113130, 1788, 6790, 81565, 90417, 5347, 7520, 8520, 7272, 54780, 4173, 55143, 4172, 4175, 4174, 4176, 699, 5424, 4436, 1063, 3014, 9183, 85456, 2237, 5527, 4288, 9184, 23047, 891, 10189, 142	875	245	8395	2.0755	0.000281722	5.63508e-05	0.000515519
GOTERM_CC_FAT	GO:0044454~nuclear chromosome part	66	6.30975	3.34618e-07	4796, 23030, 6599, 10856, 54107, 79809, 6591, 57820, 983, 6929, 57332, 2956, 10714, 50485, 10155, 3619, 5883, 79892, 6256, 84787, 9918, 5977, 8726, 5499, 4088, 23310, 23028, 6778, 4084, 4087, 6934, 11335, 7517, 55723, 10524, 113130, 1788, 6790, 9219, 5347, 7520, 8289, 8520, 57459, 26012, 4173, 4172, 4175, 4174, 10036, 4176, 699, 5424, 8507, 4436, 9837, 3014, 53615, 85456, 5814, 2237, 23435, 5810,…	875	334	8395	1.89588	0.000282712	4.71242e-05	0.00051733
GOTERM_BP_FAT	GO:0033554~cellular response to stress	191	18.26	4.15712e-07	5436, 4796, 10130, 84930, 10897, 55746, 23511, 5164, 23514, 6422, 6421, 51008, 8013, 8324, 64210, 1386, 6612, 2956, 10714, 10155, 116028, 6494, 3150, 677, 6781, 55031, 9354, 11140, 3551, 51366, 5831, 1719, 55658, 7175, 26353, 5934, 84893, 5936, 6778, 4792, 10728, 112399, 4609, 7517, 23636, 55215, 10524, 4776, 1432, 1454, 113130, 7327, 9768, 23480, 22992, 10087, 6188, 1788, 81565, 4638, 7422, 9776…	939	1319	9027	1.39209	0.00276647	0.000162946	0.000815042
GOTERM_BP_FAT	GO:0000070~mitotic sister chromatid segregation	31	2.96367	5.83242e-07	7517, 10460, 11130, 64151, 29127, 113130, 9700, 55165, 90417, 10615, 9493, 5347, 7272, 55719, 55143, 11065, 699, 3833, 1063, 9918, 9183, 9702, 11004, 7175, 10459, 9184, 23310, 23047, 891, 10783, 9055	939	111	9027	2.68483	0.00387918	0.000215906	0.0011435
KEGG_PATHWAY	hsa04110:Cell cycle	28	2.67686	1.61895e-06	10971, 11200, 7027, 983, 9700, 10926, 5347, 7272, 4173, 4172, 4175, 4174, 890, 4176, 699, 9088, 7465, 9232, 1021, 9133, 10459, 9184, 991, 5934, 4088, 891, 4609, 4087	403	102	3968	2.70287	0.000399802	0.000399802	0.00209916
GOTERM_BP_FAT	GO:0006281~DNA repair	70	6.69216	3.30322e-06	5436, 4796, 571, 23514, 10856, 51008, 6421, 983, 11198, 57332, 64210, 6612, 2956, 10714, 10155, 116028, 3150, 7398, 55719, 1137, 55031, 5883, 22944, 84444, 5983, 51366, 9401, 9112, 23028, 84893, 10432, 55215, 7517, 9319, 10524, 11200, 1454, 113130, 3508, 9768, 10363, 22992, 6188, 29089, 6749, 7520, 9320, 2176, 64708, 54780, 22897, 51514, 4862, 10038, 5428, 10036, 5424, 80198, 4436, 2305, 3014, 92…	939	385	9027	1.74789	0.0217722	0.00115789	0.0064761
GOTERM_BP_FAT	GO:0010629~negative regulation of gene expression	141	13.4799	6.42471e-06	5436, 55746, 23511, 3720, 8535, 332, 6422, 6421, 1390, 221937, 8013, 51176, 1386, 58533, 6418, 51773, 10155, 1488, 26155, 677, 56998, 55031, 4686, 79813, 8726, 7175, 1810, 5934, 5936, 6778, 9646, 4609, 11335, 23636, 10524, 51593, 4776, 58487, 128239, 1788, 6188, 10522, 7422, 9775, 9219, 2274, 23090, 5347, 4784, 7520, 5138, 26147, 8427, 9991, 23521, 329, 9759, 2305, 1063, 3014, 53615, 5054, 23186,…	939	952	9027	1.42384	0.0419108	0.00213843	0.0125955
GOTERM_BP_FAT	GO:0000075~cell cycle checkpoint	40	3.82409	6.63361e-06	55215, 7517, 11130, 11200, 1432, 7027, 332, 10397, 983, 6790, 51322, 1386, 5347, 7272, 51514, 81620, 890, 699, 5883, 80198, 4436, 84444, 7153, 1063, 84446, 4849, 3014, 5546, 9183, 85456, 7175, 10459, 5527, 55571, 5810, 9184, 5934, 55055, 891, 10783	939	181	9027	2.12451	0.0432436	0.00210286	0.013005
GOTERM_BP_FAT	GO:0044772~mitotic cell cycle phase transition	73	6.97897	6.75098e-06	84930, 571, 7846, 7027, 7298, 332, 22974, 9700, 983, 10926, 6929, 6868, 27338, 8462, 4659, 677, 81620, 55031, 5707, 4849, 9702, 1719, 7175, 5934, 10106, 55215, 7517, 10460, 11200, 5087, 1454, 113130, 128239, 219771, 6241, 5520, 6790, 57787, 5347, 7272, 58480, 22897, 4173, 4172, 4175, 4174, 890, 11065, 4176, 699, 80198, 9088, 2305, 7465, 1063, 11113, 54443, 9183, 85456, 1021, 9133, 1781, 10459, 55…	939	415	9027	1.69104	0.0439917	0.00204285	0.0132351
GOTERM_BP_FAT	GO:0051726~regulation of cell cycle	111	10.6119	6.87536e-06	84930, 29127, 23513, 332, 22974, 6422, 6421, 8013, 6868, 2342, 51176, 10615, 1386, 6494, 677, 8872, 81620, 10807, 55031, 11140, 5546, 4605, 7175, 5934, 55055, 4609, 55215, 7517, 11130, 113130, 9768, 5565, 5347, 104, 55660, 51514, 890, 699, 329, 4436, 3832, 10419, 2305, 1063, 9183, 85456, 23435, 5810, 9184, 26471, 991, 29766, 891, 7057, 998, 7027, 10397, 9700, 983, 6929, 9493, 6926, 259266, 55719,…	939	710	9027	1.50294	0.0447838	0.00199008	0.013479
GOTERM_CC_FAT	GO:0005819~spindle	47	4.49331	1.23726e-05	23636, 10460, 79801, 55689, 1432, 29127, 332, 23172, 22974, 6188, 9700, 983, 6790, 81565, 90417, 10615, 64210, 9493, 5347, 7803, 10112, 7272, 259266, 55143, 3619, 329, 3833, 3832, 1063, 26586, 84902, 7443, 1400, 9183, 7175, 9585, 10459, 991, 57448, 891, 4957, 9055, 10783, 998, 55142, 55012, 11335	875	233	8395	1.93533	0.0104005	0.00149245	0.0191268
GOTERM_BP_FAT	GO:0071103~DNA conformation change	37	3.53728	1.28235e-05	56652, 55723, 64151, 10856, 113130, 3508, 8125, 10541, 983, 144108, 6418, 84629, 7520, 51773, 4676, 8520, 8971, 4173, 26155, 4172, 4175, 10036, 4174, 4176, 9837, 7153, 1660, 3014, 9918, 9401, 57680, 7175, 23310, 84893, 891, 2968, 142	939	166	9027	2.14275	0.0819066	0.00355434	0.0251387
GOTERM_MF_FAT	GO:0003678~DNA helicase activity	16	1.52964	1.46497e-05	4173, 4172, 56652, 4175, 4174, 4176, 10856, 9837, 3508, 10363, 1660, 9401, 57680, 84893, 7520, 2968	892	42	8342	3.56267	0.0198271	0.0198271	0.0240649
GOTERM_BP_FAT	GO:0051172~negative regulation of nitrogen compound metabolic process	139	13.2887	1.52625e-05	7536, 4796, 3720, 8535, 332, 6422, 6421, 1390, 221937, 8013, 51176, 1386, 58533, 6418, 2956, 51773, 10155, 1488, 26155, 677, 56998, 55031, 51366, 79813, 8726, 7175, 1810, 84893, 5936, 6778, 9646, 4609, 11335, 10524, 51593, 4776, 58487, 1788, 6188, 10522, 7422, 9775, 9219, 2274, 23090, 5347, 4784, 7520, 5138, 26147, 10413, 8427, 9991, 3223, 23521, 4436, 9759, 10419, 2305, 1063, 54541, 2773, 3014, …	939	951	9027	1.40512	0.0967087	0.00406014	0.0299194
GOTERM_BP_FAT	GO:0051304~chromosome separation	18	1.72084	1.89216e-05	10460, 7517, 11065, 699, 80198, 7153, 1063, 9918, 9700, 9183, 7175, 10459, 9184, 5347, 23310, 891, 7272, 10783	939	54	9027	3.20447	0.118469	0.00483805	0.0370911
GOTERM_BP_FAT	GO:0044770~cell cycle phase transition	74	7.07457	2.07035e-05	84930, 571, 7846, 7027, 7298, 332, 22974, 9700, 983, 10926, 6929, 6868, 27338, 8462, 4659, 677, 81620, 55031, 5707, 4849, 9702, 1719, 7175, 5934, 10106, 55215, 7517, 10460, 11200, 5087, 1454, 113130, 128239, 219771, 6241, 5520, 6790, 57787, 5347, 7272, 22809, 58480, 22897, 4173, 4172, 4175, 4174, 890, 11065, 4176, 699, 80198, 9088, 2305, 7465, 1063, 11113, 54443, 9183, 85456, 1021, 9133, 1781, 10…	939	436	9027	1.63164	0.128875	0.00509696	0.0405835
GOTERM_BP_FAT	GO:0010558~negative regulation of macromolecule biosynthetic process	131	12.5239	2.45111e-05	7536, 4796, 3720, 8535, 332, 6422, 6421, 1390, 221937, 8013, 51176, 1386, 58533, 6418, 51773, 10155, 1488, 26155, 677, 56998, 55031, 79813, 8726, 7175, 1810, 84893, 5936, 6778, 9646, 4609, 11335, 10524, 51593, 4776, 58487, 1788, 6188, 10522, 7422, 9775, 9219, 2274, 23090, 5347, 4784, 7520, 5138, 26147, 10413, 8427, 3223, 23521, 9759, 10419, 2305, 1063, 3014, 53615, 23186, 57680, 5814, 10608, 5448…	939	893	9027	1.41026	0.150701	0.00581672	0.0480454
GOTERM_BP_FAT	GO:0006261~DNA-dependent DNA replication	27	2.58126	2.61427e-05	54881, 1602, 56652, 11200, 4796, 63922, 11177, 10714, 50485, 4173, 5428, 10038, 4172, 4175, 81620, 4174, 5424, 4176, 80198, 9837, 7153, 5983, 79892, 2237, 84893, 10189, 142	939	107	9027	2.42582	0.159885	0.00598947	0.0512429
GOTERM_BP_FAT	GO:0006325~chromatin organization	83	7.93499	3.1779e-05	23030, 6599, 55746, 6018, 55689, 3720, 6829, 8535, 10856, 3621, 54107, 6591, 8125, 10541, 6421, 983, 11198, 51322, 55818, 57332, 51176, 6418, 1386, 84629, 5587, 51773, 8971, 10155, 3150, 11091, 26155, 58499, 84444, 56950, 84787, 7443, 51366, 79813, 8726, 7175, 1810, 9112, 8019, 5934, 23028, 10432, 10765, 9646, 4609, 11335, 10524, 55723, 10363, 22992, 1788, 6790, 54934, 144108, 11176, 7422, 11177,…	939	511	9027	1.56148	0.190856	0.00703443	0.0622875
GOTERM_BP_FAT	GO:0009628~response to abiotic stimulus	99	9.46463	3.28496e-05	1196, 23514, 159, 3728, 6422, 6868, 60626, 1386, 2956, 3150, 6494, 26155, 677, 6781, 55031, 7175, 5936, 11080, 112399, 4792, 4609, 83759, 7517, 10524, 4776, 1432, 9768, 2626, 5351, 1788, 10522, 4638, 7422, 7520, 5138, 51514, 10413, 5428, 55872, 890, 5424, 329, 9379, 4436, 9759, 54541, 3014, 491, 3939, 5810, 891, 5433, 2185, 7057, 840, 571, 10856, 10397, 6591, 6513, 80781, 7398, 50848, 1137, 56262…	939	638	9027	1.49174	0.196609	0.00703684	0.0643852
GOTERM_BP_FAT	GO:0051783~regulation of nuclear division	28	2.67686	3.55339e-05	7517, 10460, 113130, 332, 6790, 9700, 5347, 7272, 55719, 11065, 699, 9088, 4436, 3832, 10419, 1063, 54443, 9183, 7175, 10459, 9585, 4288, 5810, 9184, 991, 891, 10783, 998	939	115	9027	2.34066	0.210853	0.00737276	0.0696448
GOTERM_BP_FAT	GO:0033045~regulation of sister chromatid segregation	18	1.72084	4.14766e-05	10460, 7517, 11065, 699, 113130, 1063, 6421, 9700, 9183, 2237, 7175, 10459, 9184, 5347, 891, 7272, 10783, 55719	939	57	9027	3.03582	0.241495	0.00834095	0.0812877
GOTERM_BP_FAT	GO:0031327~negative regulation of cellular biosynthetic process	133	12.7151	4.37377e-05	1196, 7536, 4796, 3720, 8535, 332, 6422, 6421, 1390, 221937, 8013, 51176, 1386, 58533, 6418, 51773, 10155, 1488, 26155, 677, 56998, 55031, 79813, 8726, 7175, 1810, 84893, 5936, 6778, 9646, 4609, 11335, 10524, 51593, 4776, 58487, 1788, 6188, 10522, 7422, 9775, 9219, 2274, 23090, 5347, 4784, 7520, 5138, 26147, 10413, 8427, 3223, 23521, 9759, 10419, 2305, 1063, 2773, 3014, 53615, 23186, 57680, 5814,…	939	921	9027	1.38826	0.252839	0.00853613	0.0857173
GOTERM_MF_FAT	GO:0003682~chromatin binding	60	5.73614	5.37671e-05	6599, 3720, 6829, 8535, 10856, 6591, 6421, 983, 11198, 51322, 55818, 51176, 1386, 84629, 2956, 10155, 3150, 1488, 26155, 79892, 6256, 9918, 7443, 8726, 7175, 8019, 9112, 5934, 4088, 23310, 23028, 4087, 54881, 23636, 113130, 9768, 2626, 2313, 1788, 9219, 8289, 6749, 29089, 57459, 22809, 10413, 5428, 23592, 4174, 10036, 5424, 26053, 9759, 7153, 1063, 2737, 5901, 53615, 57680, 26471	892	333	8342	1.68505	0.0708654	0.0360837	0.0882959
GOTERM_CC_FAT	GO:0005667~transcription factor complex	40	3.82409	6.66365e-05	1602, 10524, 865, 4776, 5087, 7027, 6621, 2626, 6421, 51008, 1390, 8013, 10522, 6929, 9219, 64210, 51176, 2972, 55502, 5307, 22809, 10155, 9329, 10413, 4862, 9442, 79101, 8543, 27097, 6256, 129685, 23186, 5934, 4088, 23028, 10432, 2968, 142, 6934, 4087	875	199	8395	1.9285	0.0547537	0.007014	0.102973
GOTERM_BP_FAT	GO:0009890~negative regulation of biosynthetic process	134	12.8107	6.98835e-05	1196, 7536, 4796, 3720, 8535, 332, 6422, 6421, 1390, 221937, 8013, 51176, 1386, 58533, 6418, 51773, 10155, 1488, 26155, 677, 56998, 55031, 79813, 8726, 7175, 1810, 84893, 5936, 6778, 9646, 4609, 11335, 10524, 51593, 4776, 58487, 1788, 6188, 10522, 7422, 9775, 9219, 2274, 23090, 5347, 4784, 7520, 5138, 26147, 10413, 8427, 3223, 23521, 9759, 10419, 2305, 1063, 2773, 3014, 53615, 23186, 57680, 5814,…	939	938	9027	1.37335	0.372317	0.0132181	0.136925
GOTERM_CC_FAT	GO:0042612~MHC class I protein complex	7	0.669216	7.97587e-05	3136, 3106, 567, 3134, 3133, 3105, 3140	875	9	8395	7.46222	0.0651777	0.00746078	0.123239
GOTERM_CC_FAT	GO:0042555~MCM complex	7	0.669216	7.97587e-05	4173, 4172, 4175, 4796, 4174, 4176, 79892	875	9	8395	7.46222	0.0651777	0.00746078	0.123239
GOTERM_CC_FAT	GO:0000785~chromatin	55	5.25813	8.16107e-05	23030, 6599, 10856, 79809, 6591, 6421, 6929, 55818, 57332, 84629, 2956, 23076, 8971, 10155, 3150, 55719, 3619, 79892, 6256, 84787, 5977, 8726, 1656, 4088, 23310, 84893, 23028, 6778, 4084, 9646, 4087, 6934, 11335, 55723, 10524, 113130, 27429, 1788, 11176, 9219, 5347, 8289, 8520, 57459, 26012, 10036, 4176, 8507, 1063, 3014, 5901, 53615, 85456, 23435, 23047	875	309	8395	1.70772	0.0666395	0.00687266	0.126099
GOTERM_CC_FAT	GO:0030496~midbody	27	2.58126	8.5085e-05	23636, 79801, 29127, 23172, 332, 6790, 6513, 983, 55165, 1500, 10615, 9493, 5347, 9798, 10112, 259266, 55143, 3619, 10807, 1063, 3309, 2773, 5901, 9585, 57448, 9055, 998	875	114	8395	2.27233	0.0693759	0.00651504	0.131464
GOTERM_CC_FAT	GO:0000775~chromosome, centromeric region	31	2.96367	8.59923e-05	11130, 23030, 55746, 113130, 332, 1788, 6790, 81565, 90417, 10615, 5347, 6612, 4659, 7272, 55143, 3619, 699, 1063, 84787, 9918, 9183, 11004, 7175, 5527, 4288, 9184, 55055, 23310, 23047, 891, 11335	875	140	8395	2.12445	0.0700892	0.00603725	0.132865
GOTERM_BP_FAT	GO:0007088~regulation of mitotic nuclear division	25	2.39006	9.17313e-05	10460, 7517, 113130, 332, 6790, 9700, 5347, 7272, 55719, 11065, 699, 9088, 3832, 10419, 1063, 54443, 9183, 7175, 10459, 9585, 4288, 9184, 891, 10783, 998	939	102	9027	2.35623	0.457369	0.0168379	0.179695
GOTERM_BP_FAT	GO:2001251~negative regulation of chromosome organization	23	2.19885	9.75363e-05	7517, 22823, 26155, 23030, 3720, 699, 1063, 51366, 9700, 9183, 55818, 7175, 10459, 9184, 5347, 6418, 23028, 7520, 9320, 891, 7272, 142, 55011	939	90	9027	2.45676	0.477961	0.0174145	0.191056
GOTERM_BP_FAT	GO:0006366~transcription from RNA polymerase II promoter	156	14.914	0.000112345	5436, 6018, 84271, 1479, 3720, 8535, 6621, 6422, 6421, 1390, 8013, 51176, 1386, 10155, 11091, 6618, 1488, 26155, 9442, 58499, 56998, 4686, 8543, 3551, 9877, 79813, 4605, 8726, 7175, 1810, 6778, 4691, 9646, 4792, 112399, 4609, 10524, 51593, 4776, 1432, 51496, 2626, 2313, 1788, 10522, 1997, 7422, 9775, 9219, 2274, 23090, 5347, 22926, 4784, 6749, 5138, 26147, 10413, 23592, 26053, 9759, 27097, 2305, …	939	1135	9027	1.32132	0.527024	0.0195101	0.220034
GOTERM_BP_FAT	GO:1902679~negative regulation of RNA biosynthetic process	107	10.2294	0.000117391	7536, 4796, 3720, 8535, 332, 6422, 6421, 1390, 221937, 8013, 51176, 1386, 58533, 6418, 51773, 10155, 1488, 26155, 56998, 55031, 79813, 8726, 7175, 1810, 6778, 9646, 4609, 11335, 10524, 4776, 58487, 1788, 10522, 7422, 2274, 9219, 23090, 5347, 4784, 7520, 5138, 26147, 10413, 8427, 3223, 9759, 10419, 2305, 1063, 3014, 53615, 23186, 57680, 5814, 10608, 23435, 571, 55689, 6829, 25920, 6591, 6929, 8462…	939	724	9027	1.42077	0.542665	0.0198601	0.229905
GOTERM_BP_FAT	GO:0010965~regulation of mitotic sister chromatid separation	14	1.33843	0.000125381	10460, 7517, 11065, 699, 1063, 9700, 9183, 7175, 10459, 5347, 9184, 891, 7272, 10783	939	40	9027	3.3647	0.566382	0.0206731	0.245536
GOTERM_BP_FAT	GO:0044784~metaphase/anaphase transition of cell cycle	14	1.33843	0.000125381	10460, 7517, 11065, 699, 1063, 9700, 9183, 7175, 10459, 5347, 9184, 891, 7272, 10783	939	40	9027	3.3647	0.566382	0.0206731	0.245536
GOTERM_BP_FAT	GO:0010212~response to ionizing radiation	25	2.39006	0.000126953	1196, 7517, 10524, 11200, 1432, 23514, 6240, 6794, 6591, 6422, 1788, 7520, 10413, 5428, 5883, 4436, 79073, 84446, 3014, 836, 9112, 5810, 23028, 142, 4609	939	104	9027	2.31092	0.570903	0.0204244	0.248611
GOTERM_BP_FAT	GO:0007093~mitotic cell cycle checkpoint	29	2.77247	0.00013051	7517, 55215, 11130, 11200, 7027, 6790, 983, 5347, 1386, 7272, 890, 699, 5883, 80198, 4436, 7153, 1063, 4849, 5546, 9183, 85456, 7175, 10459, 5527, 55571, 9184, 55055, 5934, 891	939	130	9027	2.14453	0.580954	0.020496	0.255567
GOTERM_BP_FAT	GO:0009314~response to radiation	48	4.58891	0.000132098	7517, 1196, 10524, 11200, 840, 4776, 1432, 23514, 10856, 6240, 9768, 6794, 6591, 6422, 1788, 10522, 22954, 60626, 2956, 7520, 7398, 3150, 51514, 50848, 10413, 26155, 5428, 55872, 55031, 5424, 5883, 4436, 79073, 1965, 84446, 3014, 836, 2237, 9112, 5810, 5499, 8704, 23028, 5936, 5295, 142, 4609, 83759	939	263	9027	1.75454	0.585366	0.0202653	0.258673
GOTERM_BP_FAT	GO:0031577~spindle checkpoint	12	1.14723	0.000171472	9183, 7517, 7175, 10459, 699, 9184, 5347, 332, 891, 1063, 7272, 10397	939	31	9027	3.72132	0.68107	0.025638	0.335652
GOTERM_BP_FAT	GO:0008283~cell proliferation	148	14.1491	0.000176351	7536, 79801, 3720, 23513, 29127, 332, 7298, 2335, 22974, 6422, 8013, 747, 6868, 2342, 8324, 51176, 1386, 6494, 3150, 1488, 8872, 677, 6781, 56998, 2013, 10536, 1903, 55959, 51366, 11004, 7073, 6778, 3912, 85004, 9055, 10728, 4609, 8862, 23636, 51593, 823, 1432, 128239, 10087, 10522, 5612, 10730, 81565, 1841, 7422, 5347, 7520, 104, 85440, 102, 3133, 10413, 890, 4176, 699, 9759, 10419, 2305, 1063, …	939	1076	9027	1.32229	0.691276	0.0257798	0.345187
GOTERM_CC_FAT	GO:0000793~condensed chromosome	30	2.86807	0.000183936	11130, 55746, 64151, 113130, 332, 57820, 6790, 81565, 90417, 10615, 84365, 5347, 54780, 3619, 699, 5883, 7153, 1063, 84787, 3014, 9918, 9183, 11004, 4288, 5810, 9184, 55055, 23310, 891, 11335	875	139	8395	2.07071	0.143962	0.0118858	0.283995
GOTERM_BP_FAT	GO:0033047~regulation of mitotic sister chromatid segregation	15	1.43403	0.000198595	10460, 7517, 11065, 699, 1063, 9700, 9183, 7175, 10459, 9184, 5347, 891, 7272, 10783, 55719	939	47	9027	3.06811	0.733817	0.0283633	0.388647
GOTERM_BP_FAT	GO:0002480~antigen processing and presentation of exogenous peptide antigen via MHC class I, TAP-independent	6	0.573614	0.00021047	3136, 3106, 567, 3134, 3133, 3105	939	7	9027	8.24007	0.754072	0.0294041	0.41184
GOTERM_BP_FAT	GO:0051306~mitotic sister chromatid separation	14	1.33843	0.000218318	10460, 7517, 11065, 699, 1063, 9700, 9183, 7175, 10459, 5347, 9184, 891, 7272, 10783	939	42	9027	3.20447	0.766606	0.0298583	0.427166
GOTERM_BP_FAT	GO:0033044~regulation of chromosome organization	42	4.0153	0.00022776	7517, 10460, 23030, 3720, 10856, 113130, 6591, 6421, 9700, 144108, 55818, 7422, 6418, 5347, 5587, 7520, 9320, 26147, 7272, 10155, 55719, 22823, 26155, 11065, 699, 26053, 1063, 51366, 9183, 8726, 2237, 7175, 10459, 4288, 9184, 23028, 891, 9646, 10783, 55011, 142, 4609	939	225	9027	1.7945	0.780843	0.0305039	0.445601
GOTERM_BP_FAT	GO:0010605~negative regulation of macromolecule metabolic process	195	18.6424	0.000233859	4796, 23511, 55746, 3720, 332, 8013, 221937, 11329, 51176, 2956, 51773, 1488, 51366, 79813, 8726, 7175, 1810, 84893, 6778, 4609, 11335, 23636, 51593, 4776, 58487, 128239, 7327, 5347, 4784, 1847, 8427, 9991, 55872, 23521, 329, 2305, 10318, 1063, 53615, 80851, 718, 10608, 54487, 9184, 7057, 23030, 571, 6599, 6591, 983, 8462, 55502, 7850, 10658, 11236, 5707, 10236, 84444, 51665, 55269, 4849, 10766, …	939	1491	9027	1.25729	0.789573	0.0306915	0.457508
GOTERM_BP_FAT	GO:2000113~negative regulation of cellular macromolecule biosynthetic process	119	11.3767	0.000238475	3720, 8535, 332, 6422, 6421, 1390, 221937, 8013, 51176, 1386, 58533, 6418, 51773, 10155, 1488, 26155, 677, 56998, 55031, 79813, 8726, 7175, 1810, 84893, 5936, 6778, 9646, 4609, 11335, 10524, 51593, 4776, 58487, 1788, 6188, 10522, 7422, 9775, 9219, 2274, 23090, 5347, 4784, 7520, 5138, 26147, 8427, 23521, 9759, 2305, 1063, 3014, 53615, 23186, 57680, 5814, 10608, 54487, 571, 55689, 6829, 25920, 8570…	939	837	9027	1.36678	0.795949	0.0306838	0.466518
GOTERM_BP_FAT	GO:0045934~negative regulation of nucleobase-containing compound metabolic process	120	11.4723	0.000242135	7536, 4796, 3720, 8535, 332, 6422, 6421, 1390, 221937, 8013, 51176, 1386, 58533, 6418, 2956, 51773, 10155, 1488, 26155, 56998, 55031, 51366, 79813, 8726, 7175, 1810, 84893, 6778, 9646, 4609, 11335, 10524, 4776, 58487, 1788, 6188, 10522, 7422, 9219, 2274, 23090, 5347, 4784, 7520, 5138, 26147, 10413, 8427, 9991, 3223, 4436, 9759, 10419, 2305, 1063, 54541, 3014, 2773, 53615, 23186, 57680, 5814, 1060…	939	846	9027	1.36361	0.800867	0.0305577	0.473663
GOTERM_BP_FAT	GO:0036211~protein modification process	304	29.0631	0.000267792	1196, 55746, 90135, 23511, 140459, 3720, 54107, 332, 54492, 25797, 2335, 23275, 11329, 6868, 2342, 8324, 51176, 6612, 2011, 11320, 55230, 55643, 11091, 92912, 84287, 2013, 9870, 3716, 51366, 79813, 80829, 10090, 55658, 8726, 7175, 1810, 84893, 4609, 55215, 23636, 1432, 1455, 51496, 1454, 7327, 128239, 10087, 5351, 4638, 5347, 85440, 1847, 79624, 6764, 55872, 329, 27097, 2305, 10318, 8754, 53615, …	939	2475	9027	1.1808	0.83217	0.0331148	0.523727
GOTERM_BP_FAT	GO:0006464~cellular protein modification process	304	29.0631	0.000267792	1196, 55746, 90135, 23511, 140459, 3720, 54107, 332, 54492, 25797, 2335, 23275, 11329, 6868, 2342, 8324, 51176, 6612, 2011, 11320, 55230, 55643, 11091, 92912, 84287, 2013, 9870, 3716, 51366, 79813, 80829, 10090, 55658, 8726, 7175, 1810, 84893, 4609, 55215, 23636, 1432, 1455, 51496, 1454, 7327, 128239, 10087, 5351, 4638, 5347, 85440, 1847, 79624, 6764, 55872, 329, 27097, 2305, 10318, 8754, 53615, …	939	2475	9027	1.1808	0.83217	0.0331148	0.523727
GOTERM_BP_FAT	GO:0051253~negative regulation of RNA metabolic process	109	10.4207	0.000294511	7536, 4796, 3720, 8535, 332, 6422, 6421, 1390, 221937, 8013, 51176, 1386, 58533, 6418, 51773, 10155, 1488, 26155, 56998, 55031, 79813, 8726, 7175, 1810, 6778, 9646, 4609, 11335, 10524, 4776, 58487, 1788, 10522, 7422, 2274, 9219, 23090, 5347, 4784, 7520, 5138, 26147, 10413, 8427, 9991, 3223, 9759, 10419, 2305, 1063, 3014, 53615, 23186, 57680, 5814, 10608, 23435, 571, 55689, 6829, 25920, 6591, 6929…	939	758	9027	1.3824	0.85955	0.0356974	0.575838
GOTERM_BP_FAT	GO:1902099~regulation of metaphase/anaphase transition of cell cycle	13	1.24283	0.00030825	7517, 11065, 699, 1063, 9700, 9183, 7175, 10459, 5347, 9184, 891, 7272, 10783	939	38	9027	3.2888	0.871842	0.0366654	0.602625
GOTERM_BP_FAT	GO:0030071~regulation of mitotic metaphase/anaphase transition	13	1.24283	0.00030825	7517, 11065, 699, 1063, 9700, 9183, 7175, 10459, 5347, 9184, 891, 7272, 10783	939	38	9027	3.2888	0.871842	0.0366654	0.602625
GOTERM_BP_FAT	GO:0045930~negative regulation of mitotic cell cycle	34	3.25048	0.000312132	55215, 7517, 11130, 11200, 7027, 23513, 6790, 983, 1386, 5347, 7272, 677, 890, 55031, 699, 5883, 80198, 4436, 7153, 1063, 4849, 5546, 9183, 85456, 7175, 10459, 5527, 55571, 9184, 4088, 55055, 5934, 891, 10106	939	171	9027	1.91144	0.875116	0.0364679	0.610192
GOTERM_MF_FAT	GO:0008094~DNA-dependent ATPase activity	17	1.62524	0.000327292	4173, 7517, 4175, 4176, 10856, 3508, 63922, 7153, 5983, 10363, 1660, 9401, 57680, 84893, 7520, 50485, 2968	892	59	8342	2.69465	0.360764	0.138569	0.536344
GOTERM_BP_FAT	GO:1903507~negative regulation of nucleic acid-templated transcription	103	9.84704	0.000384736	7536, 4796, 3720, 8535, 332, 6422, 6421, 1390, 221937, 8013, 51176, 1386, 58533, 6418, 51773, 10155, 1488, 26155, 56998, 55031, 79813, 8726, 7175, 1810, 6778, 9646, 4609, 11335, 10524, 4776, 58487, 1788, 10522, 7422, 2274, 9219, 23090, 5347, 4784, 7520, 5138, 26147, 10413, 8427, 3223, 9759, 2305, 10419, 1063, 3014, 53615, 23186, 57680, 5814, 10608, 571, 55689, 6829, 25920, 6591, 6929, 8462, 57332…	939	713	9027	1.38875	0.923033	0.043992	0.75162
GOTERM_BP_FAT	GO:0044839~cell cycle G2/M phase transition	32	3.05927	0.00038994	55215, 11200, 84930, 571, 5087, 7846, 1454, 332, 219771, 22974, 5520, 6790, 983, 57787, 5347, 4659, 22809, 22897, 890, 55031, 80198, 9088, 2305, 7465, 1063, 11113, 9702, 9133, 1781, 891, 4957, 55142	939	159	9027	1.93478	0.925657	0.0438223	0.761749
GOTERM_BP_FAT	GO:0008630~intrinsic apoptotic signaling pathway in response to DNA damage	21	2.00765	0.000406686	11200, 4776, 55031, 5883, 4436, 79073, 54541, 6591, 83596, 27429, 6188, 27141, 666, 22954, 5527, 26471, 23028, 2956, 84893, 51246, 5295	939	86	9027	2.34746	0.93351	0.0449048	0.79434
GOTERM_MF_FAT	GO:0003677~DNA binding	183	17.4952	0.000408627	10152, 5436, 6018, 57209, 3720, 8535, 6621, 63922, 54107, 1316, 9925, 6421, 1390, 221937, 8013, 57862, 51176, 6418, 1386, 2956, 10155, 116028, 3150, 677, 58499, 81620, 8543, 54620, 4605, 11004, 1810, 7690, 7552, 5934, 84893, 6778, 4691, 4609, 115950, 7517, 55215, 9880, 51593, 403341, 4776, 58487, 54531, 2626, 22992, 91012, 2313, 6188, 1788, 10522, 5612, 144108, 1997, 9219, 23090, 22926, 4784, 674…	892	1364	8342	1.25471	0.428052	0.130361	0.66921
GOTERM_CC_FAT	GO:0000779~condensed chromosome, centromeric region	20	1.91205	0.000432688	11130, 3619, 55746, 699, 332, 1063, 84787, 9918, 6790, 9183, 81565, 11004, 90417, 10615, 9184, 5347, 55055, 23310, 891, 11335	875	80	8395	2.39857	0.306289	0.0257832	0.666863
GOTERM_BP_FAT	GO:0009892~negative regulation of metabolic process	204	19.5029	0.000439754	1196, 4796, 23511, 55746, 3720, 332, 8013, 221937, 11329, 51176, 2956, 51773, 1488, 51366, 79813, 8726, 7175, 1810, 84893, 6778, 4609, 11335, 23636, 51593, 4776, 58487, 128239, 7327, 5347, 4784, 1847, 8427, 9991, 55872, 23521, 329, 2305, 10318, 1063, 53615, 80851, 718, 10608, 54487, 9184, 7057, 23030, 571, 6599, 6591, 983, 8462, 55502, 7850, 10658, 11236, 5707, 10236, 84444, 51665, 4849, 55269, 1…	939	1588	9027	1.23497	0.946665	0.0476786	0.858663
GOTERM_BP_FAT	GO:0006351~transcription, DNA-templated	266	25.4302	0.000445193	1479, 84271, 3720, 57209, 6621, 1316, 332, 79809, 8125, 3728, 8013, 221937, 57862, 8324, 51176, 51773, 11091, 6618, 1488, 58499, 9877, 79813, 4605, 1719, 7073, 8726, 7175, 8019, 1810, 6778, 4792, 4609, 11335, 115950, 23636, 55723, 9880, 51593, 403341, 4776, 58487, 1432, 51496, 2313, 5612, 1997, 5347, 22926, 2972, 4784, 6749, 8427, 55205, 329, 27097, 2305, 10318, 1063, 53615, 10608, 2968, 23030, 5…	939	2145	9027	1.19215	0.948565	0.0474821	0.86924
GOTERM_BP_FAT	GO:0000226~microtubule cytoskeleton organization	50	4.78011	0.000450517	9648, 29127, 23172, 332, 22974, 983, 9700, 10615, 9493, 3925, 4659, 2011, 6566, 259266, 84446, 10376, 4605, 9702, 11004, 7175, 10432, 9055, 10460, 7517, 11200, 9768, 6188, 6790, 81565, 90417, 57787, 5347, 7272, 85440, 10112, 22809, 50810, 329, 3833, 3832, 7465, 55172, 26586, 1400, 9183, 4287, 4140, 10783, 55012, 55142	939	292	9027	1.64613	0.950358	0.04728	0.879592
GOTERM_BP_FAT	GO:0031324~negative regulation of cellular metabolic process	190	18.1644	0.000459423	1196, 7536, 4796, 84930, 3720, 8535, 332, 6422, 6421, 8013, 1390, 221937, 11329, 51176, 6418, 1386, 58533, 2956, 23076, 51773, 10155, 1488, 677, 10160, 26155, 56998, 55031, 3551, 51232, 51366, 79813, 8726, 7175, 1810, 84893, 5936, 6778, 871, 9646, 4609, 11335, 23636, 10524, 51593, 4776, 58487, 2764, 6188, 1788, 10522, 7422, 9775, 9219, 2274, 23090, 5347, 4784, 7520, 104, 5138, 26147, 1847, 10413,…	939	1465	9027	1.24679	0.95322	0.0474454	0.896905
GOTERM_BP_FAT	GO:0018193~peptidyl-amino acid modification	111	10.6119	0.00046491	1196, 10152, 84930, 6018, 23511, 55746, 3720, 8535, 332, 25797, 54107, 2289, 6422, 11329, 6868, 51176, 1386, 58533, 6418, 6612, 2011, 10155, 11091, 54814, 26155, 30815, 10536, 11140, 53944, 3551, 3716, 79813, 8726, 7175, 1810, 112399, 9646, 23636, 10524, 1432, 1455, 1454, 7327, 9360, 54934, 122830, 7422, 5347, 26147, 85440, 26053, 9759, 27097, 10419, 54541, 53615, 80851, 51602, 891, 129401, 2185,…	939	784	9027	1.36108	0.9549	0.0472665	0.907572
GOTERM_BP_FAT	GO:0031570~DNA integrity checkpoint	27	2.58126	0.000518213	55215, 11200, 1432, 7027, 6790, 983, 51322, 5347, 1386, 51514, 81620, 890, 5883, 80198, 4436, 84444, 7153, 84446, 4849, 3014, 85456, 5527, 55571, 5810, 5934, 891, 10783	939	127	9027	2.0438	0.96839	0.0517552	1.01113
GOTERM_BP_FAT	GO:0032508~DNA duplex unwinding	17	1.62524	0.000537564	4173, 4172, 56652, 4175, 4174, 4176, 10856, 9837, 3508, 7153, 1660, 9401, 57680, 84893, 7520, 2968, 142	939	63	9027	2.5941	0.972216	0.0528448	1.04869
GOTERM_BP_FAT	GO:0007051~spindle organization	21	2.00765	0.000559081	11200, 329, 29127, 23172, 332, 3833, 3832, 22974, 6188, 6790, 4605, 90417, 7175, 10615, 5347, 9493, 7272, 10783, 9055, 259266, 55142	939	88	9027	2.29411	0.975929	0.0541046	1.09045
GOTERM_BP_FAT	GO:0051252~regulation of RNA metabolic process	272	26.0038	0.000592654	1196, 4796, 55746, 3720, 57209, 92906, 6621, 1316, 332, 79809, 8125, 3728, 8013, 221937, 57862, 8324, 51176, 51773, 11091, 6618, 1488, 58499, 79813, 4605, 1719, 8726, 7073, 7175, 1810, 8019, 6778, 4792, 4609, 11335, 115950, 23636, 55723, 51593, 9880, 403341, 4776, 58487, 1432, 51496, 2313, 5612, 1997, 5347, 22926, 2972, 4784, 6749, 8427, 55205, 9991, 329, 27097, 2305, 10318, 1063, 53615, 10608, 2…	939	2208	9027	1.18426	0.980757	0.0564418	1.15557
GOTERM_BP_FAT	GO:0018205~peptidyl-lysine modification	52	4.97132	0.000596225	23030, 55689, 6018, 23511, 55746, 3720, 8535, 10856, 54107, 332, 6591, 55818, 57332, 51176, 6418, 1386, 6612, 10155, 11091, 26155, 10054, 3619, 56950, 84444, 84787, 79813, 8726, 7175, 9112, 1810, 23028, 9646, 23636, 10524, 10363, 54934, 8520, 26147, 54780, 9329, 22823, 55143, 26053, 10847, 9759, 27097, 7153, 53615, 51602, 129401, 55011, 142	939	311	9027	1.60739	0.98121	0.0559729	1.1625
GOTERM_BP_FAT	GO:0051321~meiotic cell cycle	24	2.29446	0.000599502	7517, 9319, 23592, 84930, 80198, 4436, 7153, 57820, 3014, 9918, 9232, 6790, 9700, 9183, 10096, 4288, 9184, 5810, 5347, 991, 2956, 23310, 7272, 259266	939	108	9027	2.13632	0.981616	0.0554907	1.16885
GOTERM_BP_FAT	GO:0019219~regulation of nucleobase-containing compound metabolic process	294	28.1071	0.000604693	1196, 4796, 55746, 3720, 57209, 92906, 6621, 23514, 63922, 1316, 332, 79809, 8125, 3728, 8013, 221937, 57862, 8324, 51176, 2956, 51773, 11091, 6618, 1488, 58499, 51366, 79813, 4605, 1719, 8726, 7073, 7175, 1810, 8019, 84893, 6778, 4792, 4609, 11335, 115950, 54881, 23636, 55723, 51593, 9880, 403341, 4776, 58487, 1432, 51496, 2313, 5612, 1997, 5347, 22926, 2972, 4784, 6749, 8427, 55205, 9991, 329, …	939	2410	9027	1.17276	0.982242	0.0551916	1.17892
GOTERM_BP_FAT	GO:0000086~G2/M transition of mitotic cell cycle	30	2.86807	0.000611148	55215, 11200, 84930, 571, 5087, 7846, 1454, 332, 219771, 22974, 5520, 6790, 983, 57787, 5347, 4659, 22897, 890, 55031, 80198, 9088, 2305, 7465, 11113, 9702, 9133, 1781, 891, 4957, 55142	939	149	9027	1.93559	0.98299	0.0550114	1.19143
GOTERM_BP_FAT	GO:0017148~negative regulation of translation	25	2.39006	0.000627279	3609, 51593, 8570, 57510, 6188, 9470, 9775, 23405, 3658, 10658, 677, 11236, 23521, 10236, 8507, 26523, 1965, 4849, 5901, 7175, 54487, 4088, 5936, 3181, 4087	939	115	9027	2.08987	0.984724	0.0556712	1.22269
GOTERM_BP_FAT	GO:1903046~meiotic cell cycle process	21	2.00765	0.00065229	7517, 9319, 23592, 84930, 80198, 4436, 7153, 57820, 9918, 9232, 6790, 9700, 9183, 10096, 4288, 5810, 5347, 2956, 23310, 7272, 259266	939	89	9027	2.26833	0.987071	0.0570674	1.27115
GOTERM_MF_FAT	GO:0003729~mRNA binding	29	2.77247	0.000654093	1479, 6829, 92906, 8570, 7298, 57510, 10482, 6188, 6187, 9775, 1973, 3658, 104, 10658, 29894, 677, 9939, 23521, 10236, 6625, 8629, 1719, 80153, 5814, 7175, 23435, 6428, 5936, 3181	892	139	8342	1.95114	0.591162	0.1638	1.06919
GOTERM_MF_FAT	GO:0042393~histone binding	27	2.58126	0.000689103	55723, 4796, 8535, 3621, 8125, 10541, 11198, 144108, 11176, 57332, 51176, 6418, 2956, 26147, 51773, 8520, 11091, 22823, 26155, 3014, 9918, 7443, 57680, 8019, 23310, 1163, 55011	892	126	8342	2.004	0.610281	0.145343	1.12611
GOTERM_BP_FAT	GO:0034249~negative regulation of cellular amide metabolic process	26	2.48566	0.000736247	51593, 3609, 8570, 57510, 6188, 9470, 9775, 23405, 3658, 10658, 677, 11236, 23521, 10236, 8507, 26523, 1965, 4849, 5901, 7175, 54487, 4088, 5936, 3181, 4087, 6653	939	123	9027	2.0321	0.992614	0.0633467	1.43364
GOTERM_BP_FAT	GO:0007091~metaphase/anaphase transition of mitotic cell cycle	12	1.14723	0.000748056	9183, 7517, 10460, 7175, 10459, 699, 9184, 5347, 891, 1063, 7272, 9700	939	36	9027	3.20447	0.993173	0.0635108	1.45648
GOTERM_BP_FAT	GO:0051171~regulation of nitrogen compound metabolic process	318	30.4015	0.000751363	1196, 4796, 55746, 84271, 57209, 3720, 92906, 6621, 23514, 63922, 1316, 332, 79809, 8125, 3728, 8013, 10480, 221937, 57862, 1973, 8324, 51176, 2956, 51773, 11091, 6618, 1488, 8872, 58499, 23, 51366, 79813, 4605, 1719, 8726, 7073, 7175, 1810, 8019, 84893, 6778, 4792, 4609, 115950, 11335, 54881, 23636, 55723, 51593, 9880, 403341, 4776, 58487, 1432, 51496, 1454, 2313, 5612, 1997, 5347, 2972, 22926, …	939	2639	9027	1.15842	0.993322	0.0629808	1.46287
GOTERM_BP_FAT	GO:0006357~regulation of transcription from RNA polymerase II promoter	148	14.1491	0.000752953	6018, 3720, 8535, 6621, 79809, 6422, 6421, 1390, 221937, 8013, 51176, 1386, 10155, 11091, 3150, 1488, 26155, 9442, 58499, 56998, 8543, 3551, 79813, 4605, 7073, 8726, 7175, 1810, 8019, 7690, 5934, 6778, 4691, 9646, 4792, 112399, 4609, 10524, 4776, 1432, 51496, 2626, 2313, 1788, 10522, 5612, 1997, 7422, 9775, 9219, 2274, 23090, 5347, 22926, 4784, 5138, 26147, 10413, 23592, 3223, 26053, 9759, 2305, …	939	1111	9027	1.28064	0.993393	0.0623265	1.46595
GOTERM_MF_FAT	GO:0003690~double-stranded DNA binding	68	6.50096	0.000789345	6599, 571, 3720, 10856, 6421, 8013, 221937, 1390, 6929, 55818, 51176, 1386, 84629, 2956, 55502, 6926, 8543, 26523, 22944, 55893, 6256, 55269, 5977, 4605, 11004, 147912, 9112, 7552, 4088, 2909, 84893, 2114, 6778, 4084, 4609, 2118, 4087, 6934, 2119, 7003, 7517, 4776, 5087, 2626, 2313, 1997, 11176, 9219, 22926, 7520, 5307, 57459, 22809, 170463, 10413, 4174, 4436, 10419, 53615, 2737, 9183, 9667, 5814…	892	429	8342	1.48237	0.660221	0.142907	1.28893
GOTERM_BP_FAT	GO:0000910~cytokinesis	20	1.91205	0.00081046	3619, 29127, 5413, 332, 257364, 11113, 26586, 54443, 9700, 55165, 10096, 9585, 3925, 5347, 9493, 9798, 10112, 10783, 9055, 998	939	84	9027	2.28891	0.995497	0.0661072	1.57706
GOTERM_BP_FAT	GO:0016569~covalent chromatin modification	65	6.21415	0.000816641	23030, 6599, 55689, 6018, 3720, 8535, 10856, 54107, 3621, 6591, 6421, 983, 51322, 55818, 57332, 51176, 6418, 1386, 5587, 51773, 10155, 11091, 26155, 56950, 84444, 84787, 7443, 51366, 79813, 8726, 1810, 9112, 8019, 5934, 23028, 10432, 10765, 9646, 11335, 55723, 10524, 10363, 22992, 1788, 6790, 54934, 7422, 11176, 9219, 8289, 9320, 8520, 26147, 9329, 22823, 26053, 10847, 27097, 9759, 10419, 53615, …	939	417	9027	1.49849	0.995679	0.06579	1.589
GOTERM_BP_FAT	GO:0010564~regulation of cell cycle process	67	6.40535	0.000859125	7027, 29127, 332, 22974, 10397, 6422, 6421, 9700, 983, 6929, 6868, 51176, 10615, 9493, 55719, 677, 10807, 81620, 55031, 5707, 4849, 7175, 9585, 5934, 10432, 10106, 55215, 10460, 7517, 1602, 11200, 5087, 113130, 6790, 90417, 5347, 7272, 22809, 55660, 890, 11065, 699, 80198, 9088, 4436, 3832, 10419, 2305, 1063, 11113, 54443, 9183, 85456, 2237, 10459, 4288, 5527, 5810, 5526, 991, 9184, 55571, 29766,…	939	434	9027	1.4841	0.996745	0.0682698	1.67101
GOTERM_CC_FAT	GO:0000790~nuclear chromatin	37	3.53728	0.000926782	55723, 10524, 23030, 6599, 10856, 113130, 79809, 6591, 1788, 6929, 57332, 9219, 8289, 2956, 57459, 8520, 10155, 26012, 10036, 8507, 79892, 6256, 3014, 84787, 53615, 5977, 85456, 8726, 23435, 4088, 23028, 23310, 6778, 4084, 6934, 4087, 11335	875	203	8395	1.74871	0.543193	0.0508922	1.42328
GOTERM_BP_FAT	GO:0097659~nucleic acid-templated transcription	273	26.0994	0.000966937	4796, 55746, 1479, 84271, 3720, 57209, 6621, 1316, 332, 79809, 8125, 3728, 8013, 221937, 57862, 8324, 51176, 51773, 11091, 6618, 1488, 58499, 9877, 79813, 4605, 1719, 7073, 8726, 7175, 1810, 8019, 6778, 4792, 4609, 11335, 115950, 23636, 55723, 51593, 9880, 403341, 4776, 58487, 1432, 51496, 2313, 5612, 1997, 5347, 22926, 2972, 4784, 6749, 8427, 55205, 329, 27097, 2305, 10318, 1063, 53615, 10608, 2…	939	2234	9027	1.17478	0.998414	0.0756083	1.87882
GOTERM_MF_FAT	GO:0004003~ATP-dependent DNA helicase activity	11	1.05163	0.00100007	4173, 4175, 4176, 10856, 3508, 7520, 84893, 10363, 1660, 9401, 2968	892	31	8342	3.31846	0.745328	0.157155	1.63037
GOTERM_BP_FAT	GO:2000112~regulation of cellular macromolecule biosynthetic process	290	27.7247	0.00100527	55746, 84271, 3720, 57209, 6621, 63922, 1316, 332, 79809, 8125, 3728, 8013, 10480, 221937, 57862, 1973, 8324, 51176, 51773, 11091, 6618, 1488, 8872, 58499, 23, 79813, 4605, 1719, 8726, 7073, 7175, 1810, 8019, 84893, 6778, 4792, 4609, 11335, 115950, 54881, 23636, 55723, 51593, 9880, 403341, 4776, 58487, 1432, 51496, 2313, 5612, 1997, 5347, 22926, 2972, 4784, 6749, 8427, 55205, 23521, 329, 27097, 2…	939	2391	9027	1.16599	0.998772	0.0775785	1.95261
GOTERM_BP_FAT	GO:0051254~positive regulation of RNA metabolic process	121	11.5679	0.00104983	5436, 6018, 92906, 1316, 6422, 1390, 221937, 8013, 8324, 51176, 64210, 1386, 51773, 10155, 3150, 11091, 1488, 677, 58499, 4686, 8543, 3551, 4605, 7552, 6778, 4691, 4792, 9646, 4609, 23636, 10524, 4776, 1432, 2626, 2313, 10522, 1997, 7422, 9775, 9219, 2274, 23090, 2972, 22926, 4784, 10413, 890, 26053, 9759, 2305, 10318, 129685, 5054, 57680, 891, 5433, 10189, 23082, 55011, 571, 6599, 6829, 7027, 25…	939	886	9027	1.31289	0.999088	0.0799531	2.03833
GOTERM_BP_FAT	GO:0051985~negative regulation of chromosome segregation	11	1.05163	0.00106599	9183, 7517, 7175, 10459, 699, 9184, 5347, 891, 1063, 7272, 9700	939	32	9027	3.30461	0.999181	0.0802179	2.06939
GOTERM_BP_FAT	GO:0033046~negative regulation of sister chromatid segregation	11	1.05163	0.00106599	9183, 7517, 7175, 10459, 699, 9184, 5347, 891, 1063, 7272, 9700	939	32	9027	3.30461	0.999181	0.0802179	2.06939
GOTERM_BP_FAT	GO:0010468~regulation of gene expression	315	30.1147	0.00109162	1196, 55746, 84271, 23511, 57209, 3720, 92906, 6621, 1316, 332, 2335, 79809, 8125, 3728, 8013, 10480, 221937, 23275, 57862, 1973, 8324, 51176, 51773, 11091, 6618, 1488, 8872, 58499, 23, 79813, 4605, 1719, 8726, 7073, 7175, 1810, 8019, 6778, 4792, 730, 4609, 11335, 115950, 23636, 55723, 51593, 9880, 11340, 403341, 4776, 58487, 1432, 51496, 1454, 128239, 2313, 5612, 1997, 5347, 22926, 2972, 4784, 6…	939	2625	9027	1.15361	0.99931	0.0811514	2.11863
GOTERM_BP_FAT	GO:0032392~DNA geometric change	17	1.62524	0.00110852	4173, 4172, 56652, 4175, 4174, 4176, 10856, 9837, 3508, 7153, 1660, 9401, 57680, 84893, 7520, 2968, 142	939	67	9027	2.43923	0.999383	0.0814482	2.15109
GOTERM_BP_FAT	GO:0071173~spindle assembly checkpoint	9	0.860421	0.00111412	9183, 7517, 7175, 10459, 699, 9184, 5347, 1063, 7272	939	22	9027	3.93276	0.999406	0.0809512	2.16185
GOTERM_BP_FAT	GO:0007094~mitotic spindle assembly checkpoint	9	0.860421	0.00111412	9183, 7517, 7175, 10459, 699, 9184, 5347, 1063, 7272	939	22	9027	3.93276	0.999406	0.0809512	2.16185
GOTERM_BP_FAT	GO:0006310~DNA recombination	31	2.96367	0.00116047	7517, 10524, 9319, 4796, 571, 10856, 23514, 3508, 57820, 6421, 6929, 51176, 7520, 2956, 10714, 116028, 54780, 5424, 80198, 22944, 4436, 7153, 5983, 3014, 9401, 2237, 23028, 84893, 6778, 10432, 142	939	162	9027	1.8396	0.999564	0.08327	2.25082
GOTERM_BP_FAT	GO:0045935~positive regulation of nucleobase-containing compound metabolic process	137	13.0975	0.0011664	5436, 6018, 92906, 23514, 63922, 1316, 6422, 1390, 221937, 8013, 8324, 51176, 64210, 1386, 2956, 51773, 10155, 3150, 11091, 1488, 677, 58499, 4686, 8543, 3551, 5032, 4605, 7552, 6778, 4931, 4691, 9646, 4792, 4609, 23636, 10524, 4776, 1432, 2626, 2313, 6188, 10522, 1997, 7422, 9775, 9219, 2274, 23090, 2972, 22926, 4784, 10413, 890, 26053, 9759, 2305, 10318, 129685, 3014, 5054, 57680, 891, 5433, 21…	939	1027	9027	1.28241	0.999581	0.0827875	2.26221
GOTERM_BP_FAT	GO:0010556~regulation of macromolecule biosynthetic process	296	28.2983	0.0011835	4796, 55746, 84271, 3720, 57209, 6621, 63922, 1316, 332, 79809, 8125, 3728, 8013, 10480, 221937, 57862, 1973, 2342, 8324, 51176, 51773, 11091, 6618, 1488, 8872, 58499, 23, 79813, 4605, 1719, 8726, 7073, 7175, 1810, 8019, 84893, 6778, 4792, 4609, 11335, 115950, 54881, 23636, 55723, 51593, 9880, 403341, 4776, 58487, 1432, 51496, 2313, 5612, 1997, 5347, 22926, 2972, 4784, 6749, 8427, 55205, 23521, 3…	939	2453	9027	1.16004	0.999626	0.083066	2.29499
GOTERM_MF_FAT	GO:0044877~macromolecular complex binding	125	11.9503	0.00121115	10152, 3720, 8535, 3680, 2335, 6421, 6868, 51176, 1386, 2956, 8425, 10155, 3150, 1488, 26155, 2013, 23, 79892, 1903, 9918, 5358, 8726, 7175, 10096, 8019, 5934, 23310, 4931, 871, 9646, 4792, 4609, 23636, 54881, 113130, 9768, 2626, 2764, 2313, 1788, 81565, 9775, 9219, 5347, 6749, 29089, 7520, 102, 10413, 5428, 23592, 4174, 5424, 26053, 4436, 9759, 3832, 10419, 1063, 8754, 2773, 53615, 57680, 991, 2…	892	900	8342	1.29889	0.809222	0.168124	1.97128
GOTERM_BP_FAT	GO:0006397~mRNA processing	62	5.92734	0.00125017	5436, 7536, 1479, 84271, 6829, 8570, 92906, 10992, 6421, 3191, 10658, 29894, 677, 5411, 10236, 4686, 22944, 9877, 1660, 55269, 22984, 3187, 25888, 84950, 3189, 84991, 23028, 5936, 3181, 9646, 84811, 83759, 79869, 55760, 51593, 27254, 11030, 9775, 9129, 9128, 104, 55660, 84844, 8189, 9939, 6432, 4670, 9991, 22827, 55149, 6625, 10419, 57794, 10285, 23435, 11129, 6428, 5433, 6632, 891, 10189, 2968	939	400	9027	1.49008	0.99976	0.0866283	2.42278
GOTERM_BP_FAT	GO:0000077~DNA damage checkpoint	25	2.39006	0.00133169	55215, 11200, 1432, 7027, 983, 6790, 51322, 5347, 1386, 51514, 890, 80198, 5883, 4436, 84444, 84446, 3014, 4849, 85456, 5527, 55571, 5810, 5934, 891, 10783	939	121	9027	1.98624	0.999861	0.0910702	2.57883
GOTERM_CC_FAT	GO:0035770~ribonucleoprotein granule	24	2.29446	0.00133702	5436, 677, 53339, 90135, 7846, 8570, 6737, 26523, 1965, 4849, 1660, 11030, 23185, 80153, 1656, 7073, 3191, 5433, 5936, 51441, 4691, 8189, 55643, 998	875	114	8395	2.01985	0.677141	0.0682202	2.04722
GOTERM_BP_FAT	GO:0007062~sister chromatid cohesion	21	2.00765	0.00134673	55143, 11130, 3619, 55746, 699, 113130, 332, 79892, 1063, 6421, 9700, 9183, 81565, 11004, 2237, 9184, 5347, 991, 55055, 23047, 55719	939	94	9027	2.14768	0.999874	0.0911167	2.60757
GOTERM_BP_FAT	GO:1902850~microtubule cytoskeleton organization involved in mitosis	11	1.05163	0.00138923	10460, 11200, 4605, 329, 29127, 9493, 23172, 3833, 332, 3832, 22974	939	33	9027	3.20447	0.999905	0.0929146	2.68881
GOTERM_BP_FAT	GO:0006417~regulation of translation	46	4.39771	0.00139965	5436, 3609, 51593, 84271, 8570, 7298, 57510, 6188, 10480, 9470, 9775, 1973, 23405, 3658, 51441, 10658, 9939, 677, 8872, 11236, 23521, 26523, 8507, 10236, 4686, 23, 1965, 6256, 4849, 5901, 10289, 23185, 6199, 1656, 54487, 7175, 55571, 5499, 4088, 5936, 5433, 2185, 3181, 7057, 83759, 4087	939	276	9027	1.60224	0.999912	0.0926502	2.70872
GOTERM_CC_FAT	GO:0000922~spindle pole	22	2.10325	0.00143394	10460, 23636, 1432, 23172, 3832, 1063, 22974, 84902, 26586, 6790, 9183, 90417, 9585, 10615, 5347, 991, 57448, 891, 4957, 9055, 10783, 259266	875	101	8395	2.08984	0.702561	0.068842	2.19409
GOTERM_BP_FAT	GO:0051173~positive regulation of nitrogen compound metabolic process	145	13.8623	0.00144031	5436, 6018, 84271, 92906, 23514, 63922, 1316, 6422, 1390, 221937, 8013, 8324, 51176, 64210, 1386, 2956, 51773, 10155, 11091, 3150, 1488, 8872, 677, 58499, 8543, 4686, 23, 5032, 3551, 4605, 7552, 6778, 4931, 4691, 9646, 4792, 4609, 23636, 10524, 4776, 1432, 1454, 2626, 2313, 6188, 10522, 1997, 7422, 9775, 9219, 2274, 23090, 2972, 22926, 4784, 10413, 890, 26053, 9759, 2305, 10318, 129685, 3014, 505…	939	1102	9027	1.26492	0.999933	0.0942772	2.78635
GOTERM_BP_FAT	GO:0016458~gene silencing	30	2.86807	0.00144962	5436, 23636, 51593, 23511, 55746, 57510, 1788, 11176, 23405, 84629, 8289, 8520, 10155, 10658, 4686, 26523, 84444, 4849, 3014, 53615, 5901, 7175, 54487, 55571, 4088, 129401, 5433, 5936, 3181, 4087	939	157	9027	1.83696	0.999937	0.0939364	2.80413
GOTERM_MF_FAT	GO:0035326~enhancer binding	16	1.52964	0.00150364	571, 6599, 10856, 8543, 55893, 2626, 2313, 53615, 6421, 6929, 9219, 51176, 1386, 4088, 57459, 4087	892	61	8342	2.45299	0.872166	0.185924	2.44184
GOTERM_BP_FAT	GO:0045841~negative regulation of mitotic metaphase/anaphase transition	10	0.956023	0.00151069	9183, 7517, 7175, 10459, 699, 9184, 5347, 891, 1063, 7272	939	28	9027	3.43336	0.999958	0.0967594	2.92061
GOTERM_BP_FAT	GO:2000816~negative regulation of mitotic sister chromatid separation	10	0.956023	0.00151069	9183, 7517, 7175, 10459, 699, 9184, 5347, 891, 1063, 7272	939	28	9027	3.43336	0.999958	0.0967594	2.92061
GOTERM_BP_FAT	GO:1902100~negative regulation of metaphase/anaphase transition of cell cycle	10	0.956023	0.00151069	9183, 7517, 7175, 10459, 699, 9184, 5347, 891, 1063, 7272	939	28	9027	3.43336	0.999958	0.0967594	2.92061
GOTERM_BP_FAT	GO:0071174~mitotic spindle checkpoint	10	0.956023	0.00151069	9183, 7517, 7175, 10459, 699, 9184, 5347, 891, 1063, 7272	939	28	9027	3.43336	0.999958	0.0967594	2.92061
GOTERM_MF_FAT	GO:1990837~sequence-specific double-stranded DNA binding	59	5.64054	0.00160467	6599, 571, 3720, 10856, 6421, 221937, 8013, 1390, 6929, 55818, 51176, 1386, 84629, 55502, 6926, 26523, 8543, 55893, 6256, 55269, 5977, 4605, 11004, 147912, 9112, 4088, 7552, 2909, 2114, 6778, 4084, 4609, 2118, 4087, 6934, 2119, 7003, 4776, 5087, 2626, 2313, 1997, 11176, 9219, 22926, 5307, 57459, 22809, 170463, 10413, 4174, 4436, 10419, 2737, 53615, 9183, 5814, 84166, 55011	892	370	8342	1.49127	0.88868	0.180923	2.60389
GOTERM_BP_FAT	GO:0051098~regulation of binding	38	3.63289	0.00161818	53339, 4776, 1454, 10856, 6790, 115908, 9775, 51176, 5347, 51773, 267, 10155, 1488, 23228, 58499, 56998, 5792, 9759, 84444, 1965, 3309, 5901, 1400, 23560, 9709, 10459, 5499, 4088, 84893, 23028, 567, 4792, 998, 142, 4609, 6934, 6653, 4087	939	217	9027	1.68346	0.999979	0.102303	3.1253
GOTERM_BP_FAT	GO:0045892~negative regulation of transcription, DNA-templated	96	9.17782	0.00166681	571, 55689, 3720, 6829, 25920, 8535, 332, 6591, 6422, 6421, 8013, 221937, 1390, 6929, 8462, 57332, 51176, 23405, 1386, 58533, 6418, 84629, 55502, 51773, 10155, 6926, 1488, 26155, 56998, 55031, 84444, 56950, 6256, 51053, 55269, 79813, 8726, 147912, 7175, 80139, 1810, 4088, 2909, 23028, 2114, 6778, 3181, 4084, 10765, 9646, 4609, 11335, 6934, 4087, 10524, 10971, 1602, 3609, 4776, 58487, 10363, 1788,…	939	685	9027	1.34728	0.999985	0.104227	3.21778
GOTERM_BP_FAT	GO:0010628~positive regulation of gene expression	138	13.1931	0.00171083	5436, 6018, 84271, 92906, 1316, 2335, 6422, 1390, 221937, 8013, 8324, 51176, 64210, 1386, 51773, 10155, 3150, 11091, 1488, 8872, 58499, 4686, 8543, 23, 3551, 4605, 7552, 6778, 4691, 4792, 9646, 4609, 83759, 23636, 10524, 4776, 1432, 128239, 2626, 2313, 6188, 10522, 1997, 7422, 9775, 9219, 2274, 23090, 2972, 22926, 4784, 10413, 890, 26053, 9759, 2305, 10318, 129685, 5054, 57680, 718, 23185, 891, 5…	939	1046	9027	1.26831	0.999989	0.105839	3.30139
GOTERM_MF_FAT	GO:0004386~helicase activity	25	2.39006	0.00171307	56652, 55760, 10856, 3508, 10363, 9775, 1973, 23405, 7520, 79009, 50485, 4173, 4172, 4175, 4174, 4176, 10847, 9837, 1660, 9401, 57680, 1656, 84893, 64794, 2968	892	120	8342	1.94834	0.904035	0.177424	2.77747
GOTERM_BP_FAT	GO:2001141~regulation of RNA biosynthetic process	258	24.6654	0.00178536	4796, 55746, 3720, 57209, 6621, 1316, 332, 79809, 8125, 3728, 8013, 221937, 57862, 8324, 51176, 51773, 11091, 6618, 1488, 58499, 79813, 4605, 1719, 7073, 8726, 7175, 8019, 1810, 6778, 4792, 4609, 11335, 115950, 23636, 55723, 9880, 51593, 403341, 4776, 58487, 1432, 51496, 2313, 5612, 1997, 5347, 22926, 2972, 4784, 6749, 8427, 55205, 329, 27097, 2305, 10318, 1063, 53615, 10608, 2968, 23030, 571, 65…	939	2120	9027	1.16993	0.999993	0.109181	3.44284
GOTERM_BP_FAT	GO:0051225~spindle assembly	17	1.62524	0.00181752	11200, 329, 29127, 23172, 3833, 332, 3832, 22974, 6188, 6790, 4605, 7175, 5347, 9493, 10783, 55142, 259266	939	70	9027	2.33469	0.999995	0.11003	3.50382
GOTERM_BP_FAT	GO:0007126~meiotic nuclear division	19	1.81644	0.00183368	7517, 9319, 23592, 84930, 80198, 4436, 7153, 57820, 9232, 6790, 9700, 9183, 10096, 4288, 5347, 5810, 2956, 7272, 259266	939	83	9027	2.20066	0.999995	0.109956	3.53444
GOTERM_CC_FAT	GO:0036464~cytoplasmic ribonucleoprotein granule	22	2.10325	0.0018557	5436, 677, 53339, 90135, 7846, 8570, 6737, 26523, 1965, 4849, 1660, 11030, 23185, 80153, 1656, 7073, 5433, 5936, 51441, 4691, 55643, 998	875	103	8395	2.04926	0.791855	0.0835021	2.8308
GOTERM_BP_FAT	GO:0051784~negative regulation of nuclear division	12	1.14723	0.00195387	9183, 7517, 7175, 10459, 699, 9184, 5347, 5810, 4436, 891, 1063, 7272	939	40	9027	2.88403	0.999998	0.115697	3.76192
GOTERM_BP_FAT	GO:0000281~mitotic cytokinesis	10	0.956023	0.00199163	55165, 9585, 29127, 3925, 9493, 5347, 257364, 10112, 26586, 54443	939	29	9027	3.31497	0.999998	0.116764	3.83327
GOTERM_CC_FAT	GO:0000794~condensed nuclear chromosome	13	1.24283	0.00205845	3619, 699, 5883, 5810, 84365, 5347, 23310, 891, 3014, 57820, 84787, 9918, 6790	875	46	8395	2.71143	0.824688	0.0875677	3.13552
GOTERM_CC_FAT	GO:0072686~mitotic spindle	13	1.24283	0.00205845	55689, 29127, 6188, 9700, 6790, 983, 90417, 9585, 7175, 10615, 9493, 998, 259266	875	46	8395	2.71143	0.824688	0.0875677	3.13552
GOTERM_BP_FAT	GO:1903506~regulation of nucleic acid-templated transcription	256	24.4742	0.00208109	4796, 55746, 3720, 57209, 6621, 332, 1316, 79809, 8125, 3728, 8013, 221937, 57862, 8324, 51176, 51773, 11091, 6618, 1488, 58499, 79813, 4605, 1719, 7073, 8726, 7175, 8019, 1810, 6778, 4792, 4609, 11335, 115950, 23636, 55723, 9880, 51593, 403341, 4776, 58487, 1432, 51496, 2313, 5612, 1997, 5347, 22926, 2972, 4784, 6749, 8427, 55205, 329, 27097, 2305, 10318, 1063, 53615, 10608, 2968, 23030, 571, 65…	939	2106	9027	1.16858	0.999999	0.120626	4.00215
GOTERM_BP_FAT	GO:0072331~signal transduction by p53 class mediator	26	2.48566	0.00209993	10524, 11200, 5164, 7027, 6794, 6591, 10397, 83596, 666, 6790, 983, 4436, 56950, 80196, 79073, 2305, 54541, 4849, 85456, 5527, 55571, 26471, 5934, 23028, 51246, 891	939	132	9027	1.89355	0.999999	0.120604	4.03768
GOTERM_BP_FAT	GO:0045786~negative regulation of cell cycle	54	5.16252	0.00216748	23513, 7027, 983, 9700, 1386, 6494, 677, 8872, 55031, 5883, 51053, 4849, 5546, 7175, 9585, 7128, 4088, 55055, 5934, 10432, 4609, 6934, 10106, 10668, 55215, 7517, 11200, 11130, 6794, 27429, 6790, 5565, 5347, 7272, 22809, 890, 11065, 699, 80198, 4436, 7153, 1063, 9183, 85456, 1021, 10459, 5527, 5810, 55571, 9184, 26471, 5526, 891, 7057	939	345	9027	1.50471	0.999999	0.123179	4.16495
GOTERM_BP_FAT	GO:0034248~regulation of cellular amide metabolic process	48	4.58891	0.00223078	5436, 3609, 51593, 84271, 8570, 1454, 7298, 57510, 6188, 10480, 9470, 9775, 1973, 23405, 3658, 51441, 10658, 9939, 677, 8872, 11236, 23521, 26523, 8507, 10236, 4686, 23, 1965, 6256, 4849, 5901, 10289, 23185, 6199, 1656, 54487, 7175, 55571, 5499, 4088, 5936, 5433, 2185, 3181, 7057, 83759, 6653, 4087	939	298	9027	1.54847	1	0.125477	4.28407
GOTERM_BP_FAT	GO:0061640~cytoskeleton-dependent cytokinesis	11	1.05163	0.00227397	55165, 9585, 10096, 29127, 3925, 9493, 5347, 257364, 10112, 26586, 54443	939	35	9027	3.02136	1	0.126682	4.36528
GOTERM_BP_FAT	GO:1901988~negative regulation of cell cycle phase transition	26	2.48566	0.00233808	7517, 55215, 11200, 7027, 6790, 983, 5347, 22809, 7272, 677, 890, 699, 55031, 80198, 1063, 4849, 9183, 85456, 7175, 10459, 5527, 9184, 55571, 5934, 891, 10106	939	133	9027	1.87931	1	0.128941	4.48568
GOTERM_BP_FAT	GO:1901991~negative regulation of mitotic cell cycle phase transition	25	2.39006	0.00235985	7517, 55215, 11200, 7027, 6790, 983, 5347, 7272, 677, 890, 699, 55031, 80198, 1063, 4849, 9183, 85456, 7175, 10459, 5527, 9184, 55571, 5934, 891, 10106	939	126	9027	1.90742	1	0.128998	4.52654
GOTERM_MF_FAT	GO:0000976~transcription regulatory region sequence-specific DNA binding	55	5.25813	0.00237748	571, 6599, 3720, 10856, 6421, 1390, 221937, 8013, 6929, 55818, 51176, 1386, 84629, 55502, 6926, 26523, 8543, 55893, 6256, 55269, 5977, 4605, 147912, 9112, 4088, 7552, 2909, 2114, 6778, 4084, 4609, 2118, 4087, 6934, 2119, 7003, 4776, 5087, 2626, 2313, 1997, 11176, 9219, 22926, 5307, 57459, 22809, 170463, 10413, 10419, 2737, 53615, 5814, 84166, 55011	892	345	8342	1.4909	0.961376	0.221432	3.83507
GOTERM_CC_FAT	GO:0000781~chromosome, telomeric region	23	2.19885	0.00240625	7517, 4173, 4172, 4175, 11200, 4174, 4176, 5424, 4436, 84444, 3014, 983, 85456, 2237, 5499, 23028, 7520, 8520, 10189, 10728, 54780, 142, 11335	875	112	8395	1.97026	0.869415	0.0967778	3.65613
GOTERM_BP_FAT	GO:0033048~negative regulation of mitotic sister chromatid segregation	10	0.956023	0.0025872	9183, 7517, 7175, 10459, 699, 9184, 5347, 891, 1063, 7272	939	30	9027	3.20447	1	0.139393	4.95221
GOTERM_BP_FAT	GO:0031057~negative regulation of histone modification	10	0.956023	0.0025872	22823, 26155, 23030, 55818, 3720, 6418, 23028, 9320, 55011, 51366	939	30	9027	3.20447	1	0.139393	4.95221
KEGG_PATHWAY	hsa03030:DNA replication	10	0.956023	0.00272018	4173, 4172, 4175, 4174, 2237, 5424, 4176, 54107, 10714, 5983	403	31	3968	3.17618	0.489723	0.285663	3.47023
GOTERM_MF_FAT	GO:0044212~transcription regulatory region DNA binding	68	6.50096	0.0027934	6599, 571, 3720, 8535, 6621, 10856, 6421, 8013, 221937, 1390, 6929, 55818, 8462, 51176, 1386, 3191, 84629, 55502, 6926, 8543, 26523, 55893, 6256, 10379, 55269, 55290, 5977, 4605, 147912, 9112, 7552, 4088, 2909, 23028, 2114, 6778, 4084, 4609, 2118, 4087, 6934, 2119, 7003, 4776, 5087, 2626, 2313, 1997, 11176, 9219, 22926, 7520, 5307, 57459, 22809, 170463, 2553, 10413, 4862, 55205, 9759, 10419, 2737…	892	450	8342	1.41319	0.978158	0.239012	4.49163
GOTERM_MF_FAT	GO:0000975~regulatory region DNA binding	68	6.50096	0.00292037	6599, 571, 3720, 8535, 6621, 10856, 6421, 8013, 221937, 1390, 6929, 55818, 8462, 51176, 1386, 3191, 84629, 55502, 6926, 8543, 26523, 55893, 6256, 10379, 55269, 55290, 5977, 4605, 147912, 9112, 7552, 4088, 2909, 23028, 2114, 6778, 4084, 4609, 2118, 4087, 6934, 2119, 7003, 4776, 5087, 2626, 2313, 1997, 11176, 9219, 22926, 7520, 5307, 57459, 22809, 170463, 2553, 10413, 4862, 55205, 9759, 10419, 2737…	892	451	8342	1.41006	0.981648	0.233969	4.69122
GOTERM_MF_FAT	GO:0001067~regulatory region nucleic acid binding	68	6.50096	0.00308227	6599, 571, 3720, 8535, 6621, 10856, 6421, 8013, 221937, 1390, 6929, 55818, 8462, 51176, 1386, 3191, 84629, 55502, 6926, 8543, 26523, 55893, 6256, 10379, 55269, 55290, 5977, 4605, 147912, 9112, 7552, 4088, 2909, 23028, 2114, 6778, 4084, 4609, 2118, 4087, 6934, 2119, 7003, 4776, 5087, 2626, 2313, 1997, 11176, 9219, 22926, 7520, 5307, 57459, 22809, 170463, 2553, 10413, 4862, 55205, 9759, 10419, 2737…	892	452	8342	1.40694	0.985301	0.231833	4.94514
GOTERM_CC_FAT	GO:0000940~condensed chromosome outer kinetochore	5	0.478011	0.00315483	55746, 699, 5347, 891, 1063	875	7	8395	6.85306	0.930751	0.119394	4.76779
GOTERM_CC_FAT	GO:0045120~pronucleus	6	0.573614	0.00326634	890, 8726, 3191, 1063, 6790, 6513	875	11	8395	5.23325	0.936997	0.118087	4.93235
Cancer Type:	BLCA
Positive Correlations
GOTERM_BP_FAT	GO:0000280~nuclear division	31	20	1.43386e-12	5719, 84930, 29127, 23397, 113130, 332, 983, 6790, 55165, 90417, 55839, 9493, 5347, 890, 10592, 9088, 3832, 8607, 1018, 5901, 9232, 4605, 9133, 84501, 4288, 991, 891, 9787, 9055, 4085, 1164	143	421	9095	4.68324	3.63338e-09	3.63338e-09	2.53335e-09
GOTERM_BP_FAT	GO:0048285~organelle fission	31	20	7.89539e-12	5719, 84930, 29127, 23397, 113130, 332, 983, 6790, 55165, 90417, 55839, 9493, 5347, 890, 10592, 9088, 3832, 8607, 1018, 5901, 9232, 4605, 9133, 84501, 4288, 991, 891, 9787, 9055, 4085, 1164	143	450	9095	4.38143	2.00068e-08	1.00034e-08	1.39496e-08
GOTERM_BP_FAT	GO:0000278~mitotic cell cycle	41	26.4516	1.37333e-11	51379, 5719, 84930, 23511, 29127, 23397, 113130, 332, 5537, 8318, 5062, 983, 6790, 1033, 55165, 90417, 55839, 9493, 5347, 80279, 81620, 890, 10592, 5707, 9088, 3832, 8607, 2305, 1018, 5695, 5901, 9232, 4605, 9133, 4288, 991, 891, 9787, 9055, 4085, 1164	143	801	9095	3.2555	3.48e-08	1.16e-08	2.42641e-08
GOTERM_BP_FAT	GO:1903047~mitotic cell cycle process	39	25.1613	2.76693e-11	51379, 5719, 84930, 23511, 29127, 23397, 113130, 332, 5537, 8318, 983, 6790, 1033, 55165, 90417, 55839, 9493, 5347, 80279, 81620, 890, 10592, 5707, 9088, 3832, 8607, 2305, 1018, 5695, 5901, 9232, 4605, 9133, 991, 891, 9787, 9055, 4085, 1164	143	745	9095	3.32947	7.0114e-08	1.75285e-08	4.88865e-08
GOTERM_BP_FAT	GO:0007067~mitotic nuclear division	27	17.4194	3.03957e-11	84930, 29127, 23397, 113130, 332, 6790, 983, 55165, 90417, 55839, 9493, 5347, 890, 10592, 9088, 3832, 8607, 1018, 5901, 9232, 4605, 9133, 991, 891, 9787, 4085, 9055	143	355	9095	4.83729	7.70227e-08	1.54045e-08	5.37035e-08
GOTERM_BP_FAT	GO:0022402~cell cycle process	43	27.7419	1.8859e-09	51379, 5719, 84930, 23511, 29127, 23397, 113130, 332, 5537, 8318, 983, 6790, 1033, 55165, 90417, 55839, 9493, 5347, 80279, 81620, 890, 10592, 5707, 9088, 3832, 8607, 2305, 1018, 5695, 5901, 9232, 4605, 9133, 7248, 84501, 4288, 991, 891, 9787, 79019, 9055, 4085, 1164	143	1024	9095	2.67076	4.77886e-06	7.96479e-07	3.33204e-06
GOTERM_BP_FAT	GO:0051301~cell division	27	17.4194	4.55854e-09	84930, 29127, 23397, 113130, 332, 6790, 983, 55165, 90417, 9493, 5347, 84790, 890, 10592, 3832, 8607, 1018, 5901, 9232, 9133, 84501, 991, 891, 905, 4085, 9055, 1164	143	447	9095	3.8417	1.15513e-05	1.65019e-06	8.05408e-06
GOTERM_BP_FAT	GO:0007059~chromosome segregation	20	12.9032	7.1333e-09	29127, 23397, 113130, 10592, 332, 3832, 9232, 8940, 55165, 90417, 55839, 991, 5347, 9493, 55355, 79019, 9787, 891, 4085, 9055	143	245	9095	5.19195	1.80756e-05	2.25947e-06	1.26032e-05
GOTERM_BP_FAT	GO:0007049~cell cycle	47	30.3226	9.43863e-09	51379, 5719, 84930, 23511, 29127, 23397, 113130, 332, 5537, 8318, 5062, 983, 6790, 1033, 55165, 90417, 55839, 5347, 9493, 55355, 80279, 81620, 890, 10592, 5707, 9088, 3832, 8607, 2305, 1018, 5695, 5901, 9232, 4605, 9133, 7248, 84501, 4288, 991, 891, 9787, 79019, 905, 9055, 4085, 1164, 9156	143	1256	9095	2.37999	2.39172e-05	2.65749e-06	1.66763e-05
GOTERM_BP_FAT	GO:0044772~mitotic cell cycle phase transition	25	16.129	7.27389e-08	5719, 51379, 84930, 113130, 332, 5537, 8318, 6790, 983, 1033, 5347, 80279, 81620, 890, 5707, 9088, 2305, 1018, 5695, 9133, 991, 891, 9787, 4085, 1164	143	442	9095	3.59736	0.000184304	1.84319e-05	0.000128516
GOTERM_BP_FAT	GO:0051726~regulation of cell cycle	33	21.2903	9.40186e-08	5719, 51379, 84930, 29127, 113130, 332, 9768, 8318, 983, 6790, 1033, 90417, 9493, 5347, 80279, 81620, 890, 5707, 9088, 3832, 2305, 1018, 5695, 4605, 9133, 7248, 4288, 991, 891, 9787, 905, 4085, 1164	143	745	9095	2.81724	0.000238215	2.16582e-05	0.000166113
GOTERM_BP_FAT	GO:0098813~nuclear chromosome segregation	17	10.9677	1.10224e-07	29127, 23397, 113130, 10592, 332, 9232, 55165, 90417, 55839, 991, 5347, 9493, 79019, 891, 9787, 9055, 4085	143	205	9095	5.27426	0.000279269	2.32754e-05	0.000194745
GOTERM_BP_FAT	GO:0000819~sister chromatid segregation	16	10.3226	1.10996e-07	29127, 23397, 113130, 10592, 332, 55165, 90417, 55839, 991, 5347, 9493, 79019, 891, 9787, 9055, 4085	143	179	9095	5.68504	0.000281225	2.16355e-05	0.00019611
GOTERM_BP_FAT	GO:0051276~chromosome organization	35	22.5806	1.84931e-07	29127, 23397, 113130, 332, 8318, 10541, 983, 6790, 2648, 55165, 90417, 11177, 55839, 6418, 9493, 5347, 5887, 55355, 55352, 11091, 9329, 5245, 10592, 8607, 3015, 9232, 8940, 8473, 4288, 991, 891, 9787, 79019, 9055, 4085	143	849	9095	2.62197	0.000468507	3.3472e-05	0.000326739
GOTERM_BP_FAT	GO:0044770~cell cycle phase transition	25	16.129	2.03696e-07	5719, 51379, 84930, 113130, 332, 5537, 8318, 6790, 983, 1033, 5347, 80279, 81620, 890, 5707, 9088, 2305, 1018, 5695, 9133, 991, 891, 9787, 4085, 1164	143	467	9095	3.40479	0.000516033	3.44105e-05	0.000359893
GOTERM_CC_FAT	GO:0000793~condensed chromosome	14	9.03226	5.22354e-07	23397, 113130, 10592, 332, 6790, 8940, 90417, 55839, 4288, 5347, 55355, 79019, 891, 4085	128	156	8480	5.94551	0.000196908	0.000196908	0.000722298
GOTERM_BP_FAT	GO:0010564~regulation of cell cycle process	24	15.4839	6.1465e-07	80279, 5719, 51379, 81620, 890, 29127, 113130, 5707, 9088, 332, 3832, 2305, 8318, 5695, 6790, 983, 90417, 4288, 991, 5347, 9493, 9787, 891, 4085	143	460	9095	3.31833	0.00155631	9.73406e-05	0.00108597
GOTERM_BP_FAT	GO:0031145~anaphase-promoting complex-dependent catabolic process	10	6.45161	2.23922e-06	5719, 5347, 991, 5707, 891, 5695, 4085, 983, 9232, 6790	143	75	9095	8.48019	0.00565811	0.000333719	0.0039562
GOTERM_BP_FAT	GO:0071103~DNA conformation change	14	9.03226	2.30766e-06	23397, 113130, 10592, 8607, 8318, 10541, 983, 8940, 55839, 6418, 5887, 55355, 891, 79019	143	170	9095	5.23776	0.00583055	0.000324815	0.00407713
GOTERM_BP_FAT	GO:0000070~mitotic sister chromatid segregation	12	7.74194	2.68426e-06	55165, 90417, 29127, 23397, 113130, 9493, 10592, 5347, 891, 9787, 9055, 4085	143	121	9095	6.30758	0.00677883	0.000357931	0.00474247
GOTERM_BP_FAT	GO:0006323~DNA packaging	11	7.09677	4.68299e-06	55839, 23397, 113130, 10592, 6418, 55355, 891, 79019, 8607, 10541, 983	143	104	9095	6.72707	0.0117966	0.00059316	0.00827365
GOTERM_BP_FAT	GO:0051321~meiotic cell cycle	11	7.09677	1.15582e-05	5719, 84930, 84501, 4288, 10592, 5347, 991, 1164, 9156, 9232, 6790	143	115	9095	6.08361	0.0288639	0.00139372	0.0204192
GOTERM_BP_FAT	GO:0007052~mitotic spindle organization	7	4.51613	1.22252e-05	29127, 9493, 3832, 891, 9055, 5901, 6790	143	34	9095	13.0944	0.030504	0.00140714	0.0215975
GOTERM_BP_FAT	GO:1904668~positive regulation of ubiquitin protein ligase activity	9	5.80645	2.02408e-05	5719, 84930, 5347, 991, 5707, 891, 5695, 4085, 983	143	75	9095	7.63217	0.0499976	0.00222755	0.0357557
GOTERM_BP_FAT	GO:0051783~regulation of nuclear division	11	7.09677	2.09206e-05	4288, 113130, 5347, 991, 9088, 332, 3832, 891, 9787, 4085, 6790	143	123	9095	5.68793	0.0516327	0.00220645	0.0369564
GOTERM_CC_FAT	GO:0005819~spindle	15	9.67742	2.16192e-05	79801, 29127, 332, 3832, 2648, 6790, 983, 90417, 991, 5347, 9493, 9787, 891, 9055, 4085	128	251	8480	3.95916	0.00811739	0.00406697	0.0298904
GOTERM_BP_FAT	GO:1904666~regulation of ubiquitin protein ligase activity	9	5.80645	2.45911e-05	5719, 84930, 5347, 991, 5707, 891, 5695, 4085, 983	143	77	9095	7.43393	0.0604127	0.00248948	0.0434389
GOTERM_BP_FAT	GO:0042787~protein ubiquitination involved in ubiquitin-dependent protein catabolic process	13	8.3871	3.77031e-05	80279, 5719, 991, 5347, 5707, 23327, 891, 6921, 5695, 4085, 9232, 6790, 983	143	189	9095	4.3747	0.0911193	0.00366793	0.0665934
GOTERM_BP_FAT	GO:2000060~positive regulation of protein ubiquitination involved in ubiquitin-dependent protein catabolic process	9	5.80645	3.90088e-05	80279, 5719, 5347, 991, 5707, 891, 5695, 4085, 983	143	82	9095	6.98064	0.0941217	0.00365443	0.0688989
GOTERM_CC_FAT	GO:0005654~nucleoplasm	58	37.4194	4.5408e-05	84930, 646, 29127, 332, 8318, 5062, 983, 2648, 9493, 6418, 5887, 6921, 11091, 81620, 5707, 5695, 4605, 27327, 79019, 9055, 9156, 54881, 5719, 10527, 113130, 11103, 9768, 6790, 55839, 5347, 9128, 29089, 23327, 55355, 55352, 9329, 11267, 6431, 6626, 890, 51585, 10592, 3838, 5245, 9088, 2305, 8607, 5901, 51747, 57085, 8473, 9133, 991, 891, 10189, 905, 11260, 55635	128	2402	8480	1.59971	0.0169735	0.00569016	0.0627711
GOTERM_BP_FAT	GO:0007088~regulation of mitotic nuclear division	10	6.45161	5.6001e-05	4288, 113130, 5347, 9088, 332, 3832, 891, 9787, 4085, 6790	143	111	9095	5.72986	0.132301	0.00505541	0.0988972
GOTERM_BP_FAT	GO:0007346~regulation of mitotic cell cycle	19	12.2581	5.77645e-05	80279, 5719, 890, 113130, 5707, 9088, 332, 3832, 8318, 5695, 6790, 983, 4288, 991, 5347, 9787, 891, 4085, 1164	143	406	9095	2.97642	0.13617	0.00503485	0.10201
GOTERM_BP_FAT	GO:0007126~meiotic nuclear division	9	5.80645	5.98966e-05	5719, 84930, 84501, 4288, 10592, 5347, 1164, 9232, 6790	143	87	9095	6.57946	0.140825	0.00504664	0.105773
GOTERM_CC_FAT	GO:0000779~condensed chromosome, centromeric region	9	5.80645	6.09033e-05	90417, 55839, 5347, 332, 55355, 891, 79019, 4085, 6790	128	91	8480	6.5522	0.0226997	0.00572387	0.0841831
GOTERM_CC_FAT	GO:0030496~midbody	10	6.45161	6.89396e-05	79801, 55165, 29127, 9493, 5347, 332, 9055, 5901, 983, 6790	128	119	8480	5.56723	0.0256563	0.00518474	0.0952862
GOTERM_BP_FAT	GO:1901990~regulation of mitotic cell cycle phase transition	15	9.67742	7.27697e-05	80279, 5719, 890, 113130, 5707, 332, 8318, 5695, 983, 6790, 991, 5347, 891, 9787, 4085	143	268	9095	3.55978	0.168401	0.0059309	0.128493
GOTERM_BP_FAT	GO:2000058~regulation of protein ubiquitination involved in ubiquitin-dependent protein catabolic process	9	5.80645	7.63933e-05	80279, 5719, 5347, 991, 5707, 891, 5695, 4085, 983	143	90	9095	6.36014	0.176003	0.00603137	0.134887
GOTERM_BP_FAT	GO:0051443~positive regulation of ubiquitin-protein transferase activity	9	5.80645	8.26664e-05	5719, 84930, 5347, 991, 5707, 891, 5695, 4085, 983	143	91	9095	6.29025	0.188998	0.00632793	0.145955
GOTERM_CC_FAT	GO:0072686~mitotic spindle	7	4.51613	8.27219e-05	90417, 29127, 9493, 4085, 983, 6790, 2648	128	49	8480	9.46429	0.0307061	0.00518442	0.114326
GOTERM_CC_FAT	GO:0000775~chromosome, centromeric region	11	7.09677	8.37457e-05	90417, 4288, 55839, 113130, 5347, 332, 55355, 891, 79019, 4085, 6790	128	151	8480	4.82616	0.0310802	0.00450034	0.11574
GOTERM_BP_FAT	GO:0051439~regulation of ubiquitin-protein ligase activity involved in mitotic cell cycle	8	5.16129	8.53856e-05	5719, 5347, 991, 5707, 891, 5695, 4085, 983	143	68	9095	7.48252	0.194568	0.0063438	0.150753
GOTERM_BP_FAT	GO:0007051~spindle organization	9	5.80645	8.9361e-05	4605, 90417, 29127, 9493, 5347, 332, 3832, 9055, 6790	143	92	9095	6.22188	0.202642	0.00644914	0.157767
GOTERM_BP_FAT	GO:1903046~meiotic cell cycle process	9	5.80645	0.000104103	5719, 84930, 84501, 4288, 10592, 5347, 1164, 9232, 6790	143	94	9095	6.0895	0.231882	0.00730132	0.183772
GOTERM_BP_FAT	GO:0051437~positive regulation of ubiquitin-protein ligase activity involved in regulation of mitotic cell cycle transition	8	5.16129	0.00011266	5719, 5347, 991, 5707, 891, 5695, 4085, 983	143	71	9095	7.16635	0.248359	0.00768643	0.198863
KEGG_PATHWAY	hsa04110:Cell cycle	10	6.45161	0.000116143	9133, 890, 5347, 991, 9088, 891, 8318, 4085, 983, 9232	72	110	3999	5.04924	0.0148716	0.0148716	0.134985
GOTERM_BP_FAT	GO:0045732~positive regulation of protein catabolic process	13	8.3871	0.000125225	11267, 80279, 4478, 5719, 991, 5347, 5707, 23327, 891, 5695, 4085, 6790, 983	143	214	9095	3.86364	0.271917	0.00831628	0.221018
GOTERM_BP_FAT	GO:1901987~regulation of cell cycle phase transition	15	9.67742	0.000140126	80279, 5719, 890, 113130, 5707, 332, 8318, 5695, 983, 6790, 991, 5347, 891, 9787, 4085	143	285	9095	3.34744	0.2989	0.00906392	0.247288
GOTERM_BP_FAT	GO:0051983~regulation of chromosome segregation	8	5.16129	0.000146631	90417, 29127, 4288, 113130, 5347, 891, 9787, 4085	143	74	9095	6.87583	0.310363	0.00924672	0.258753
GOTERM_BP_FAT	GO:0000086~G2/M transition of mitotic cell cycle	11	7.09677	0.000175246	80279, 84930, 9133, 890, 5347, 9088, 332, 891, 2305, 983, 6790	143	158	9095	4.42795	0.358606	0.0107735	0.309174
GOTERM_CC_FAT	GO:0015630~microtubule cytoskeleton	26	16.7742	0.000191331	79801, 64770, 84930, 29127, 332, 8318, 6790, 2648, 983, 55165, 90417, 9493, 5347, 84790, 80279, 8398, 3832, 8607, 5901, 9133, 4830, 991, 9787, 891, 4085, 9055	128	780	8480	2.20833	0.0695981	0.00897679	0.264244
GOTERM_BP_FAT	GO:1903364~positive regulation of cellular protein catabolic process	11	7.09677	0.000204407	80279, 4478, 5719, 5347, 991, 5707, 891, 5695, 4085, 983, 6790	143	161	9095	4.34544	0.404301	0.012258	0.360534
GOTERM_BP_FAT	GO:0009896~positive regulation of catabolic process	14	9.03226	0.000205576	11267, 80279, 440503, 4478, 5719, 5347, 991, 5707, 23327, 891, 5695, 4085, 6790, 983	143	260	9095	3.42469	0.406063	0.0120428	0.362593
GOTERM_BP_FAT	GO:0051438~regulation of ubiquitin-protein transferase activity	9	5.80645	0.000211334	5719, 84930, 5347, 991, 5707, 891, 5695, 4085, 983	143	104	9095	5.50397	0.414669	0.0120984	0.372732
GOTERM_BP_FAT	GO:0042176~regulation of protein catabolic process	15	9.67742	0.000231043	11267, 80279, 4478, 5719, 5245, 5347, 991, 5707, 5887, 23327, 891, 5695, 4085, 6790, 983	143	299	9095	3.19071	0.44319	0.0129275	0.407426
GOTERM_CC_FAT	GO:0000777~condensed chromosome kinetochore	8	5.16129	0.000231316	90417, 55839, 5347, 332, 55355, 891, 79019, 4085	128	83	8480	6.38554	0.083521	0.00964388	0.319385
GOTERM_CC_FAT	GO:0000922~spindle pole	9	5.80645	0.000262186	90417, 5347, 991, 3832, 891, 9787, 9055, 4085, 6790	128	112	8480	5.32366	0.094128	0.00983702	0.361937
GOTERM_BP_FAT	GO:0044839~cell cycle G2/M phase transition	11	7.09677	0.000317471	80279, 84930, 9133, 890, 5347, 9088, 332, 891, 2305, 983, 6790	143	170	9095	4.11538	0.552733	0.0173392	0.559431
GOTERM_CC_FAT	GO:0005813~centrosome	16	10.3226	0.000389274	80279, 84930, 64770, 332, 8318, 5901, 6790, 983, 55165, 9133, 4830, 991, 5347, 9493, 891, 9787	128	369	8480	2.87263	0.13652	0.0132554	0.536938
GOTERM_BP_FAT	GO:0009894~regulation of catabolic process	17	10.9677	0.000390355	11267, 80279, 5719, 5707, 5245, 5695, 6790, 983, 440503, 4478, 8473, 991, 5347, 5887, 23327, 891, 4085	143	392	9095	2.75822	0.628183	0.0208301	0.687446
GOTERM_CC_FAT	GO:0044427~chromosomal part	21	13.5484	0.000451102	23397, 113130, 10592, 332, 8607, 8318, 5901, 3015, 6790, 2648, 983, 4605, 90417, 55839, 4288, 5347, 55355, 79019, 891, 10189, 4085	128	590	8480	2.35805	0.156423	0.0140753	0.621974
GOTERM_BP_FAT	GO:1903362~regulation of cellular protein catabolic process	12	7.74194	0.000469466	80279, 4478, 5719, 5347, 991, 5707, 5887, 891, 5695, 4085, 983, 6790	143	212	9095	3.60008	0.69575	0.0244849	0.826221
GOTERM_CC_FAT	GO:0098687~chromosomal region	13	8.3871	0.000519614	113130, 332, 983, 6790, 90417, 55839, 4288, 5347, 55355, 891, 79019, 10189, 4085	128	261	8480	3.29981	0.177943	0.0149597	0.716122
GOTERM_BP_FAT	GO:0031398~positive regulation of protein ubiquitination	10	6.45161	0.000523863	80279, 5719, 84930, 5347, 991, 5707, 891, 5695, 4085, 983	143	149	9095	4.26855	0.734944	0.0267344	0.921538
GOTERM_BP_FAT	GO:1903052~positive regulation of proteolysis involved in cellular protein catabolic process	10	6.45161	0.000523863	80279, 5719, 5347, 991, 5707, 891, 5695, 4085, 983, 6790	143	149	9095	4.26855	0.734944	0.0267344	0.921538
GOTERM_BP_FAT	GO:0030261~chromosome condensation	5	3.22581	0.000558299	23397, 113130, 10592, 891, 983	143	25	9095	12.7203	0.757105	0.0279058	0.981835
GOTERM_BP_FAT	GO:0031331~positive regulation of cellular catabolic process	12	7.74194	0.00057128	80279, 440503, 4478, 5719, 5347, 991, 5707, 891, 5695, 4085, 983, 6790	143	217	9095	3.51713	0.764969	0.0279936	1.00455
GOTERM_BP_FAT	GO:0051436~negative regulation of ubiquitin-protein ligase activity involved in mitotic cell cycle	7	4.51613	0.000594643	5719, 991, 5707, 891, 5695, 4085, 983	143	67	9095	6.64492	0.778487	0.0285699	1.04543
GOTERM_BP_FAT	GO:0045787~positive regulation of cell cycle	13	8.3871	0.000626046	51379, 29127, 113130, 9493, 332, 9787, 891, 8318, 905, 4085, 1164, 6790, 983	143	255	9095	3.24242	0.795441	0.0294977	1.10036
GOTERM_BP_FAT	GO:1904667~negative regulation of ubiquitin protein ligase activity	7	4.51613	0.000643925	5719, 991, 5707, 891, 5695, 4085, 983	143	68	9095	6.5472	0.804507	0.0297743	1.13161
KEGG_PATHWAY	hsa04914:Progesterone-mediated oocyte maturation	7	4.51613	0.000650104	9133, 890, 5347, 9088, 891, 4085, 983	72	61	3999	6.37363	0.0804682	0.0410778	0.75343
GOTERM_BP_FAT	GO:0090068~positive regulation of cell cycle process	11	7.09677	0.000702888	51379, 29127, 113130, 9493, 332, 891, 9787, 8318, 4085, 983, 6790	143	188	9095	3.72136	0.831656	0.0318762	1.23462
GOTERM_CC_FAT	GO:0005815~microtubule organizing center	18	11.6129	0.000719311	80279, 8398, 84930, 64770, 332, 8607, 8318, 5901, 6790, 983, 55165, 9133, 4830, 991, 5347, 9493, 9787, 891	128	477	8480	2.5	0.237595	0.0191905	0.990074
GOTERM_BP_FAT	GO:0045931~positive regulation of mitotic cell cycle	8	5.16129	0.000730486	113130, 332, 891, 9787, 8318, 4085, 983, 6790	143	96	9095	5.30012	0.843034	0.0325259	1.28281
GOTERM_BP_FAT	GO:0000082~G1/S transition of mitotic cell cycle	11	7.09677	0.000762963	1033, 51379, 81620, 113130, 9088, 891, 5537, 8318, 1018, 983, 6790	143	190	9095	3.68219	0.855444	0.0333621	1.33948
GOTERM_BP_FAT	GO:0000079~regulation of cyclin-dependent protein serine/threonine kinase activity	7	4.51613	0.000810965	80279, 1033, 890, 5347, 9088, 905, 1164	143	71	9095	6.27056	0.872012	0.0348243	1.42318
GOTERM_BP_FAT	GO:1904029~regulation of cyclin-dependent protein kinase activity	7	4.51613	0.000810965	80279, 1033, 890, 5347, 9088, 905, 1164	143	71	9095	6.27056	0.872012	0.0348243	1.42318
GOTERM_CC_FAT	GO:0005829~cytosol	57	36.7742	0.000899984	23239, 2584, 29127, 332, 9924, 5537, 5062, 983, 8833, 440503, 9493, 6418, 23230, 6921, 8681, 4199, 3099, 8398, 81620, 5707, 5695, 3308, 8940, 7248, 84501, 4830, 27327, 79019, 4085, 9055, 5719, 10527, 55763, 23397, 113130, 9669, 6790, 6888, 55839, 5347, 23327, 7378, 1175, 11267, 10592, 3838, 9088, 3832, 6818, 5901, 9232, 8473, 9133, 991, 891, 10189, 11260	128	2601	8480	1.45185	0.287836	0.0223757	1.23732
GOTERM_BP_FAT	GO:1903050~regulation of proteolysis involved in cellular protein catabolic process	11	7.09677	0.000931895	80279, 5719, 5347, 991, 5707, 5887, 891, 5695, 4085, 983, 6790	143	195	9095	3.58777	0.905818	0.0392516	1.63376
GOTERM_BP_FAT	GO:0051225~spindle assembly	7	4.51613	0.00100964	4605, 29127, 9493, 5347, 332, 3832, 6790	143	74	9095	6.01635	0.922674	0.0417649	1.76892
GOTERM_CC_FAT	GO:0005694~chromosome	22	14.1935	0.00102706	23397, 113130, 10592, 332, 8607, 8318, 5901, 3015, 6790, 983, 2648, 8940, 4605, 90417, 55839, 4288, 5347, 55355, 79019, 891, 10189, 4085	128	677	8480	2.15288	0.32118	0.0239217	1.41088
GOTERM_CC_FAT	GO:0005876~spindle microtubule	6	3.87097	0.00103013	5347, 332, 3832, 9055, 983, 6790	128	52	8480	7.64423	0.321967	0.0225972	1.41507
GOTERM_BP_FAT	GO:1903322~positive regulation of protein modification by small protein conjugation or removal	10	6.45161	0.00104351	80279, 5719, 84930, 5347, 991, 5707, 891, 5695, 4085, 983	143	164	9095	3.87813	0.929039	0.0424439	1.82774
GOTERM_BP_FAT	GO:0051444~negative regulation of ubiquitin-protein transferase activity	7	4.51613	0.00108356	5719, 991, 5707, 891, 5695, 4085, 983	143	75	9095	5.93613	0.935894	0.0433427	1.89725
GOTERM_BP_FAT	GO:0043486~histone exchange	5	3.22581	0.00113853	55839, 55355, 79019, 8607, 10541	143	30	9095	10.6002	0.944239	0.0447864	1.99259
GOTERM_CC_FAT	GO:0000776~kinetochore	8	5.16129	0.00120453	90417, 55839, 5347, 332, 55355, 891, 79019, 4085	128	109	8480	4.86239	0.365159	0.0249275	1.65279
GOTERM_BP_FAT	GO:0044843~cell cycle G1/S phase transition	11	7.09677	0.00146537	1033, 51379, 81620, 113130, 9088, 891, 5537, 8318, 1018, 983, 6790	143	207	9095	3.37978	0.975668	0.0564087	2.55766
GOTERM_BP_FAT	GO:0033043~regulation of organelle organization	26	16.7742	0.00150074	113130, 332, 9924, 8318, 6790, 2648, 5347, 6418, 11267, 3099, 8398, 9088, 3832, 8607, 5695, 55245, 4478, 414059, 8473, 7248, 84501, 4288, 991, 9787, 891, 4085	143	855	9095	1.93408	0.977757	0.0568688	2.61863
GOTERM_BP_FAT	GO:0031396~regulation of protein ubiquitination	11	7.09677	0.00151921	80279, 5719, 84930, 8473, 5347, 991, 5707, 891, 5695, 4085, 983	143	208	9095	3.36354	0.978776	0.0567018	2.65044
GOTERM_BP_FAT	GO:0045862~positive regulation of proteolysis	13	8.3871	0.00179329	80279, 5719, 8473, 5245, 991, 5347, 5707, 891, 5695, 4085, 10541, 6790, 983	143	288	9095	2.8709	0.989414	0.0656317	3.12149
GOTERM_MF_FAT	GO:0019901~protein kinase binding	16	10.3226	0.00193557	80279, 4478, 8398, 890, 4830, 29127, 5347, 3832, 891, 2305, 905, 5062, 9055, 23162, 1164, 6790	135	404	8380	2.45838	0.600823	0.600823	2.73106
GOTERM_BP_FAT	GO:0090307~mitotic spindle assembly	5	3.22581	0.00204792	4605, 29127, 9493, 332, 3832	143	35	9095	9.08591	0.994454	0.0735483	3.55719
GOTERM_BP_FAT	GO:0031397~negative regulation of protein ubiquitination	8	5.16129	0.00220782	5719, 8473, 991, 5707, 891, 5695, 4085, 983	143	116	9095	4.3863	0.996305	0.0779642	3.82986
GOTERM_BP_FAT	GO:1902850~microtubule cytoskeleton organization involved in mitosis	5	3.22581	0.00227632	4605, 29127, 9493, 332, 3832	143	36	9095	8.83353	0.996895	0.0791855	3.94643
GOTERM_BP_FAT	GO:0031329~regulation of cellular catabolic process	13	8.3871	0.00231856	80279, 440503, 4478, 5719, 5347, 991, 5707, 5887, 891, 5695, 4085, 983, 6790	143	297	9095	2.7839	0.997211	0.0795069	4.01825
GOTERM_BP_FAT	GO:0000022~mitotic spindle elongation	3	1.93548	0.00234706	29127, 9493, 9055	143	5	9095	38.1608	0.997406	0.0793732	4.06669
KEGG_PATHWAY	hsa04114:Oocyte meiosis	7	4.51613	0.00237225	5347, 991, 9088, 4085, 983, 9232, 6790	72	78	3999	4.98451	0.263896	0.097086	2.72428
GOTERM_BP_FAT	GO:0000910~cytokinesis	7	4.51613	0.00247214	55165, 84501, 29127, 9493, 5347, 332, 9055	143	88	9095	5.0592	0.998112	0.0823324	4.27897
GOTERM_BP_FAT	GO:0061640~cytoskeleton-dependent cytokinesis	5	3.22581	0.00252168	55165, 84501, 29127, 9493, 5347	143	37	9095	8.59478	0.998335	0.0828275	4.36293
GOTERM_BP_FAT	GO:0007143~female meiotic division	4	2.58065	0.00256037	84930, 84501, 5347, 6790	143	18	9095	14.1336	0.998491	0.0829719	4.42844
GOTERM_CC_FAT	GO:0031967~organelle envelope	25	16.129	0.00273259	6182, 54881, 10527, 23511, 51629, 28977, 516, 57017, 8681, 3099, 169714, 51012, 5245, 3838, 64432, 5901, 55245, 64928, 4830, 84895, 64951, 1337, 55326, 4085, 11260	128	884	8480	1.87359	0.643562	0.0528468	3.71305
GOTERM_CC_FAT	GO:0031975~envelope	25	16.129	0.00281494	6182, 54881, 10527, 23511, 51629, 28977, 516, 57017, 8681, 3099, 169714, 51012, 5245, 3838, 64432, 5901, 55245, 64928, 4830, 84895, 64951, 1337, 55326, 4085, 11260	128	886	8480	1.86936	0.654488	0.0517494	3.82294
GOTERM_CC_FAT	GO:0005643~nuclear pore	6	3.87097	0.00363959	10527, 23511, 3838, 4085, 5901, 11260	128	69	8480	5.76087	0.747066	0.063362	4.91694
Negative Correlations
GOTERM_CC_FAT	GO:0031012~extracellular matrix	98	18.9555	3.69116e-52	1292, 1293, 2006, 64094, 1290, 1291, 1296, 1191, 3339, 2335, 6423, 1311, 29995, 1289, 284297, 2200, 4313, 1281, 1284, 8404, 5176, 5549, 165, 3490, 3491, 6695, 3913, 6366, 2331, 7177, 1277, 7077, 1490, 3910, 7076, 1278, 4320, 22795, 2316, 22918, 6678, 7041, 25903, 10082, 83716, 1462, 7045, 4015, 7043, 6586, 4016, 1307, 10516, 1306, 4239, 1301, 1300, 10418, 10417, 1116, 5054, 7431, 7052, 4811, 1634…	433	312	8480	6.15148	1.79021e-49	1.79021e-49	5.29266e-49
GOTERM_CC_FAT	GO:0005578~proteinaceous extracellular matrix	73	14.1199	4.31081e-46	1292, 1293, 2006, 64094, 1290, 1291, 1296, 3339, 2335, 127435, 145864, 1311, 4256, 115908, 2199, 9509, 1289, 80781, 9507, 2200, 7837, 4313, 1281, 1284, 5176, 8404, 633, 5549, 3956, 3491, 6366, 3913, 6695, 2331, 7077, 1490, 1277, 3910, 7076, 1278, 4320, 22795, 54829, 6678, 8076, 1805, 25903, 10631, 10082, 4053, 83716, 1462, 151887, 7045, 64175, 8483, 4015, 4016, 6586, 10516, 1307, 1306, 4239, 3371…	433	185	8480	7.72786	2.09074e-43	1.04537e-43	6.18116e-43
GOTERM_BP_FAT	GO:0043062~extracellular structure organization	80	15.4739	5.8871e-46	1292, 1293, 83700, 1290, 64094, 2006, 1291, 1296, 3339, 2335, 6423, 1311, 90993, 3679, 3678, 9509, 1289, 80781, 22801, 2191, 9507, 2200, 7837, 4313, 1281, 1284, 5175, 4035, 23213, 633, 3611, 55959, 3693, 3685, 2, 7412, 1513, 3491, 3913, 2331, 7177, 1490, 7077, 1277, 7076, 3910, 1278, 4320, 2621, 22795, 6678, 8076, 1805, 25903, 10631, 5654, 4053, 83716, 1462, 151887, 7045, 4323, 4015, 4016, 10516,…	474	224	9095	6.85277	2.80932e-42	2.80932e-42	1.11484e-42
GOTERM_BP_FAT	GO:0030198~extracellular matrix organization	80	15.4739	5.8871e-46	1292, 1293, 83700, 1290, 64094, 2006, 1291, 1296, 3339, 2335, 6423, 1311, 90993, 3679, 3678, 9509, 1289, 80781, 22801, 2191, 9507, 2200, 7837, 4313, 1281, 1284, 5175, 4035, 23213, 633, 3611, 55959, 3693, 3685, 2, 7412, 1513, 3491, 3913, 2331, 7177, 1490, 7077, 1277, 7076, 3910, 1278, 4320, 2621, 22795, 6678, 8076, 1805, 25903, 10631, 5654, 4053, 83716, 1462, 151887, 7045, 4323, 4015, 4016, 10516,…	474	224	9095	6.85277	2.80932e-42	2.80932e-42	1.11484e-42
GOTERM_CC_FAT	GO:0005615~extracellular space	110	21.2766	6.73806e-33	1292, 1293, 83700, 1191, 3339, 8742, 2335, 6423, 1311, 114897, 29995, 5740, 284297, 2200, 4313, 1281, 5175, 5176, 8404, 5549, 3487, 55959, 165, 7412, 2, 929, 1513, 3490, 23263, 6366, 23452, 6695, 2331, 7177, 7077, 1490, 1277, 2162, 7076, 1278, 1519, 2621, 1435, 10875, 56034, 10272, 6678, 7424, 10082, 720, 1462, 7045, 1508, 4015, 4016, 7043, 6586, 10516, 1306, 56975, 10418, 10417, 1116, 5054, 716,…	433	622	8480	3.46346	3.26796e-30	1.08932e-30	9.66152e-30
GOTERM_CC_FAT	GO:0044420~extracellular matrix component	33	6.38298	1.33645e-19	1293, 2006, 64094, 1290, 1291, 1296, 22795, 3339, 2335, 6678, 8076, 1289, 80781, 151887, 7045, 2200, 4016, 10516, 1306, 1281, 4239, 1284, 5176, 3371, 1301, 4811, 3913, 4060, 1277, 3910, 7076, 1634, 1278	433	89	8480	7.26159	6.48179e-17	1.62045e-17	1.9163e-16
KEGG_PATHWAY	hsa04510:Focal adhesion	38	7.3501	5.14244e-19	1292, 1293, 1290, 1291, 2318, 56034, 2316, 55742, 2335, 7791, 1311, 10398, 4638, 7424, 3679, 3678, 4659, 1289, 22801, 60, 87, 5159, 1281, 3672, 5156, 1284, 3371, 5170, 1301, 3611, 3693, 3685, 3913, 1277, 3910, 1278, 54776, 7057	177	151	3999	5.68571	9.82205e-17	9.82205e-17	6.39689e-16
GOTERM_BP_FAT	GO:0001568~blood vessel development	67	12.9594	7.53087e-19	83700, 57343, 2004, 1296, 2702, 55742, 3339, 2335, 8742, 25960, 6423, 3678, 8877, 1289, 5740, 80781, 2191, 6925, 5159, 51564, 4313, 90627, 1281, 1284, 25932, 5175, 4035, 23213, 5176, 57493, 3716, 2260, 23166, 1909, 3685, 3491, 7070, 8828, 7075, 1490, 1277, 3910, 1278, 5787, 59, 10267, 3213, 6678, 728, 4638, 7424, 7045, 4015, 4323, 4016, 1306, 5156, 90, 26585, 1116, 5054, 5396, 358, 1634, 84168, 4…	474	381	9095	3.37423	3.59373e-15	1.79687e-15	1.42613e-15
GOTERM_MF_FAT	GO:0005201~extracellular matrix structural constituent	24	4.64217	1.52162e-18	1306, 7837, 1281, 1290, 2006, 1296, 1284, 633, 5549, 11117, 1301, 145864, 1116, 1311, 8076, 4256, 4060, 2199, 1277, 1289, 3910, 1278, 1462, 2200	442	44	8380	10.3414	1.28577e-15	1.28577e-15	2.35248e-15
GOTERM_BP_FAT	GO:0001944~vasculature development	68	13.1528	4.86864e-18	83700, 2004, 57343, 1296, 2702, 55742, 3339, 2335, 8742, 25960, 6423, 3678, 8877, 1289, 5740, 80781, 2191, 6925, 5159, 51564, 4313, 90627, 1281, 1284, 25932, 5175, 4035, 23213, 5176, 57493, 3716, 2260, 23166, 1909, 3685, 3491, 7070, 8828, 7075, 1490, 1277, 3910, 1278, 5787, 6443, 59, 10267, 3213, 6678, 728, 4638, 7424, 7045, 4015, 4323, 4016, 1306, 5156, 90, 26585, 1116, 5054, 5396, 358, 1634, 84…	474	405	9095	3.22165	2.32331e-14	7.74438e-15	9.21977e-15
GOTERM_BP_FAT	GO:0001525~angiogenesis	54	10.4449	1.04551e-17	83700, 57343, 2004, 1296, 2702, 55742, 3339, 2335, 8742, 25960, 6423, 3678, 8877, 5740, 80781, 2191, 6925, 5159, 51564, 4313, 90627, 25932, 1284, 5175, 23213, 5176, 3716, 2260, 1909, 23166, 3685, 7070, 3491, 8828, 7075, 1490, 5787, 10267, 3213, 6678, 728, 7424, 7045, 4323, 1306, 5156, 90, 26585, 1116, 5054, 358, 1634, 4240, 7057	474	270	9095	3.83755	4.98918e-14	1.24729e-14	1.97989e-14
GOTERM_BP_FAT	GO:0072359~circulatory system development	85	16.441	1.11734e-17	5066, 83700, 1296, 2004, 57343, 2702, 55742, 3339, 2335, 8742, 25960, 6423, 7122, 7168, 8642, 3678, 1289, 8877, 80781, 5740, 2191, 5159, 2200, 6925, 51564, 4313, 90627, 1281, 91624, 1284, 25932, 5175, 57493, 5176, 4035, 23213, 3611, 3716, 2260, 23166, 1909, 3685, 8728, 3491, 7070, 8828, 7075, 1490, 1277, 3910, 70, 1278, 9645, 5787, 6443, 59, 10267, 2033, 3213, 5350, 6678, 728, 4638, 7424, 7045, 4…	474	603	9095	2.70474	5.33196e-14	1.06639e-14	2.11592e-14
GOTERM_BP_FAT	GO:0072358~cardiovascular system development	85	16.441	1.11734e-17	5066, 83700, 1296, 2004, 57343, 2702, 55742, 3339, 2335, 8742, 25960, 6423, 7122, 7168, 8642, 3678, 1289, 8877, 80781, 5740, 2191, 5159, 2200, 6925, 51564, 4313, 90627, 1281, 91624, 1284, 25932, 5175, 57493, 5176, 4035, 23213, 3611, 3716, 2260, 23166, 1909, 3685, 8728, 3491, 7070, 8828, 7075, 1490, 1277, 3910, 70, 1278, 9645, 5787, 6443, 59, 10267, 2033, 3213, 5350, 6678, 728, 4638, 7424, 7045, 4…	474	603	9095	2.70474	5.33196e-14	1.06639e-14	2.11592e-14
GOTERM_BP_FAT	GO:0048514~blood vessel morphogenesis	59	11.412	1.58191e-17	83700, 57343, 2004, 1296, 2702, 55742, 3339, 2335, 8742, 25960, 6423, 3678, 8877, 5740, 80781, 2191, 6925, 5159, 51564, 4313, 90627, 1281, 25932, 1284, 5175, 4035, 23213, 5176, 57493, 3716, 2260, 23166, 1909, 3685, 7070, 3491, 8828, 7075, 1490, 5787, 10267, 3213, 6678, 728, 4638, 7424, 7045, 4323, 1306, 5156, 90, 26585, 1116, 5054, 5396, 358, 1634, 4240, 7057	474	321	9095	3.52672	7.54887e-14	1.25814e-14	2.99567e-14
GOTERM_BP_FAT	GO:0031589~cell-substrate adhesion	47	9.09091	1.11337e-16	91663, 2621, 83700, 1435, 64094, 22795, 8861, 2316, 55742, 2335, 10580, 10979, 7791, 10631, 7424, 3679, 558, 2199, 3678, 22801, 151887, 87, 4323, 1307, 10516, 1281, 3672, 5175, 11117, 5170, 3611, 26585, 3693, 5054, 3685, 7412, 3956, 3491, 7070, 6695, 6366, 4811, 1277, 1490, 84168, 1613, 7057	474	219	9095	4.11792	5.29798e-13	7.57172e-14	2.10942e-13
KEGG_PATHWAY	hsa04512:ECM-receptor interaction	23	4.44874	2.15794e-16	1292, 1293, 1281, 1290, 3672, 1291, 1284, 3339, 3371, 2335, 1301, 3693, 1311, 3685, 3913, 3679, 3678, 1277, 3910, 1289, 1278, 22801, 7057	177	56	3999	9.27936	4.24105e-14	2.12053e-14	2.77556e-13
GOTERM_CC_FAT	GO:0005581~collagen trimer	24	4.64217	2.4228e-16	1292, 1307, 1293, 1306, 1281, 1290, 1291, 5118, 1296, 1284, 81035, 11117, 1301, 1300, 115908, 114897, 4060, 1277, 1289, 7076, 1634, 80781, 1278, 4015	433	54	8480	8.70413	1.07692e-13	2.15383e-14	3.21965e-13
GOTERM_CC_FAT	GO:0005576~extracellular region	206	39.8453	2.81542e-16	91663, 83700, 64094, 2006, 1191, 8742, 2335, 1311, 79901, 114897, 10487, 5740, 284297, 11326, 2200, 8404, 5742, 3487, 55959, 165, 2, 929, 3490, 7070, 3491, 23263, 6366, 3913, 2331, 7177, 7077, 1490, 7171, 7076, 3910, 2212, 1435, 22795, 10875, 2316, 8038, 4638, 25903, 10082, 83716, 720, 1462, 7045, 7043, 411, 1307, 1306, 813, 4239, 1465, 64499, 1301, 1300, 716, 6387, 118429, 7052, 715, 4629, 710, …	433	2490	8480	1.62023	1.61537e-13	2.68674e-14	4.77396e-13
GOTERM_BP_FAT	GO:0032963~collagen metabolic process	28	5.41586	6.45609e-16	1292, 1293, 1290, 1291, 1296, 9902, 90993, 9509, 1289, 80781, 1508, 64175, 4323, 2191, 7043, 5159, 1306, 1281, 4313, 1284, 10536, 1301, 1300, 1513, 1277, 1490, 1278, 4320	474	78	9095	6.88792	3.17879e-12	3.97349e-13	1.26565e-12
GOTERM_BP_FAT	GO:0044236~multicellular organism metabolic process	29	5.60928	1.42212e-15	1292, 1293, 1290, 1291, 1296, 9902, 90993, 9509, 1289, 80781, 1508, 64175, 4323, 2191, 7043, 5159, 1306, 1281, 4313, 4239, 1284, 10536, 1301, 1300, 1513, 1277, 1490, 1278, 4320	474	87	9095	6.39592	6.88738e-12	7.65277e-13	2.73115e-12
GOTERM_BP_FAT	GO:0044259~multicellular organismal macromolecule metabolic process	28	5.41586	1.80128e-15	1292, 1293, 1290, 1291, 1296, 9902, 90993, 9509, 1289, 80781, 1508, 64175, 4323, 2191, 7043, 5159, 1306, 1281, 4313, 1284, 10536, 1301, 1300, 1513, 1277, 1490, 1278, 4320	474	81	9095	6.63281	8.47677e-12	8.47655e-13	3.36398e-12
GOTERM_BP_FAT	GO:0001501~skeletal system development	52	10.058	2.63019e-15	1290, 2702, 1009, 6423, 145864, 1311, 4256, 8642, 4920, 9507, 2200, 4313, 1281, 23213, 5549, 3487, 55959, 165, 2260, 3491, 25884, 1277, 1490, 7076, 1278, 338773, 6935, 860, 51715, 2033, 3213, 56172, 56034, 22856, 6678, 10631, 1462, 7045, 64175, 4323, 7043, 56975, 5156, 92, 11214, 1301, 1300, 26585, 1116, 10743, 5396, 4060	474	284	9095	3.51325	1.27152e-11	1.15596e-12	5.04041e-12
GOTERM_MF_FAT	GO:0005518~collagen binding	22	4.25532	5.21976e-15	3672, 5118, 22795, 8404, 2335, 127435, 1311, 54829, 6678, 9902, 1513, 114897, 131578, 4811, 4060, 84168, 1634, 22801, 1508, 7045, 64175, 7057	442	48	8380	8.68967	4.40925e-12	2.20468e-12	8.07132e-12
GOTERM_BP_FAT	GO:0022610~biological adhesion	114	22.0503	5.80267e-15	1292, 91663, 1293, 83700, 64094, 1291, 1296, 800, 55742, 2335, 1009, 6423, 1311, 83604, 7168, 114897, 3679, 3678, 1289, 22801, 2200, 11326, 1281, 8406, 5175, 5170, 3693, 7412, 3685, 3490, 7070, 3491, 6366, 3913, 6695, 4026, 1490, 1277, 3910, 1613, 2621, 1435, 10873, 22795, 8861, 2316, 10272, 22918, 8038, 7041, 7424, 1462, 7045, 10516, 1307, 9891, 1306, 91653, 4239, 1465, 5156, 392, 90, 10418, 104…	474	1048	9095	2.08722	2.75495e-11	2.29583e-12	1.09357e-11
GOTERM_CC_FAT	GO:0044421~extracellular region part	193	37.3308	7.40296e-15	1292, 91663, 1293, 83700, 2006, 1290, 64094, 1291, 1296, 1191, 3339, 1106, 2335, 8742, 1009, 6423, 1311, 79901, 114897, 4926, 10487, 29995, 1289, 5740, 5159, 2200, 11326, 284297, 4313, 1281, 1284, 5175, 5176, 8404, 5742, 5549, 3487, 55959, 3693, 165, 116496, 1513, 929, 2, 3685, 7412, 3490, 23263, 3491, 7070, 6695, 3913, 6366, 23452, 2331, 7177, 1490, 7077, 1277, 7171, 3910, 7076, 2162, 81617, 151…	433	2333	8480	1.62013	3.60767e-12	5.15366e-13	1.06692e-11
GOTERM_BP_FAT	GO:0007155~cell adhesion	113	21.8569	1.15871e-14	1292, 91663, 1293, 83700, 64094, 1291, 1296, 800, 55742, 2335, 1009, 6423, 1311, 83604, 7168, 114897, 3679, 3678, 1289, 22801, 2200, 11326, 1281, 8406, 5175, 5170, 3693, 7412, 3685, 3490, 7070, 3491, 6366, 3913, 6695, 4026, 1490, 1277, 3910, 1613, 2621, 1435, 10873, 22795, 8861, 2316, 10272, 22918, 8038, 7041, 7424, 1462, 7045, 10516, 1307, 9891, 1306, 91653, 4239, 1465, 5156, 392, 90, 10418, 104…	474	1044	9095	2.07684	5.5099e-11	4.23839e-12	2.18603e-11
GOTERM_BP_FAT	GO:0030574~collagen catabolic process	21	4.0619	2.24884e-14	1292, 1293, 1306, 1281, 4313, 1290, 1291, 1296, 1284, 1301, 1300, 9902, 1513, 9509, 1277, 1289, 80781, 1278, 1508, 4323, 4320	474	46	9095	8.75963	1.07549e-10	7.68208e-12	4.2677e-11
GOTERM_BP_FAT	GO:0044243~multicellular organism catabolic process	21	4.0619	6.08894e-14	1292, 1293, 1306, 1281, 4313, 1290, 1291, 1296, 1284, 1301, 1300, 9902, 1513, 9509, 1277, 1289, 80781, 1278, 1508, 4323, 4320	474	48	9095	8.39465	2.9033e-10	1.93553e-11	1.15219e-10
GOTERM_BP_FAT	GO:0030334~regulation of cell migration	65	12.5725	7.88561e-14	91663, 83700, 5919, 57343, 2335, 127435, 2252, 25960, 6423, 7168, 131578, 3678, 4920, 8877, 80781, 5159, 51564, 90627, 1281, 91624, 25932, 5175, 4035, 23213, 5176, 5170, 3611, 2260, 3685, 3491, 7070, 11188, 6366, 8828, 7075, 1277, 3910, 7076, 1613, 2621, 4681, 63940, 1435, 8861, 56034, 2316, 1809, 6678, 3071, 728, 89927, 4638, 10631, 7424, 104, 4323, 411, 5156, 90, 26585, 5054, 6387, 152007, 1634…	474	451	9095	2.76542	3.76157e-10	2.35099e-11	1.49269e-10
GOTERM_BP_FAT	GO:0048646~anatomical structure formation involved in morphogenesis	82	15.8607	2.97776e-13	83700, 1290, 1291, 1296, 2004, 57343, 2702, 55742, 3339, 2335, 8742, 25960, 6423, 149041, 115908, 7168, 8642, 3679, 3678, 1289, 4920, 8877, 80781, 5740, 87, 2191, 5159, 6925, 51564, 4313, 90627, 1284, 25932, 5175, 5176, 23213, 3611, 3716, 3693, 2260, 23166, 1909, 3685, 3491, 7070, 8828, 7075, 1490, 1277, 70, 5787, 26140, 10267, 51715, 2033, 8861, 3213, 2316, 8038, 6678, 728, 89927, 7424, 5654, 70…	474	673	9095	2.33789	1.42092e-09	8.35835e-11	5.63871e-10
GOTERM_MF_FAT	GO:0005178~integrin binding	24	4.64217	5.57042e-13	10516, 1307, 83700, 1281, 2335, 3611, 6423, 7412, 11188, 7070, 3491, 3913, 3678, 1490, 7077, 1289, 7106, 4240, 87, 7045, 7057, 2191, 4323, 2200	442	71	8380	6.40877	4.70664e-10	1.56888e-10	8.61144e-10
GOTERM_BP_FAT	GO:0051270~regulation of cellular component movement	68	13.1528	1.0723e-12	91663, 83700, 5919, 57343, 2702, 2335, 127435, 2252, 25960, 6423, 7168, 131578, 3678, 4920, 8877, 80781, 87, 5159, 51564, 90627, 1281, 91624, 25932, 5175, 4035, 23213, 5176, 5170, 3611, 2260, 3685, 3491, 11188, 7070, 6366, 8828, 7075, 1277, 3910, 7076, 1613, 2621, 4681, 63940, 1435, 8861, 56034, 2316, 1809, 5350, 6678, 3071, 728, 89927, 4638, 10631, 7424, 104, 4323, 411, 5156, 90, 26585, 5054, 63…	474	513	9095	2.54341	5.11679e-09	2.84266e-10	2.03053e-09
GOTERM_BP_FAT	GO:0006928~movement of cell or subcellular component	109	21.0832	1.17997e-12	91663, 83700, 57343, 800, 55742, 8742, 2335, 25960, 6423, 7169, 7168, 10487, 3678, 1289, 4920, 8877, 22801, 5159, 51564, 90627, 1281, 5175, 5176, 4035, 5170, 3716, 7412, 3685, 7070, 3491, 6366, 3913, 6695, 7075, 2331, 1490, 1277, 7171, 7076, 3910, 1278, 1613, 2621, 1435, 8861, 56034, 2316, 1783, 5350, 6678, 728, 89927, 4638, 7424, 10082, 104, 1462, 6586, 411, 91653, 5156, 90, 10417, 5054, 7431, 8…	474	1059	9095	1.97494	5.6307e-09	2.96352e-10	2.23447e-09
GOTERM_CC_FAT	GO:0044449~contractile fiber part	28	5.41586	1.56257e-12	59, 2318, 2316, 114907, 55742, 10979, 10398, 7169, 7168, 2275, 4659, 87, 25802, 57158, 171024, 23022, 4313, 91624, 5175, 3611, 23345, 115557, 27295, 1674, 4629, 7171, 70, 23336	433	106	8480	5.17321	7.57826e-10	9.47282e-11	2.24046e-09
GOTERM_BP_FAT	GO:2000145~regulation of cell motility	65	12.5725	1.7442e-12	91663, 83700, 5919, 57343, 2335, 127435, 2252, 25960, 6423, 7168, 131578, 3678, 4920, 8877, 80781, 5159, 51564, 90627, 1281, 91624, 25932, 5175, 4035, 23213, 5176, 5170, 3611, 2260, 3685, 3491, 7070, 11188, 6366, 8828, 7075, 1277, 3910, 7076, 1613, 2621, 4681, 63940, 1435, 8861, 56034, 2316, 1809, 6678, 3071, 728, 89927, 4638, 10631, 7424, 104, 4323, 411, 5156, 90, 26585, 5054, 6387, 152007, 1634…	474	482	9095	2.58756	8.32313e-09	4.16157e-10	3.30292e-09
GOTERM_BP_FAT	GO:0007160~cell-matrix adhesion	32	6.18956	1.88497e-12	83700, 1435, 22795, 8861, 10580, 10979, 2335, 7791, 10631, 7424, 3679, 22801, 87, 4323, 10516, 1307, 1281, 3672, 5175, 5170, 3611, 26585, 3693, 5054, 7412, 3685, 7070, 4811, 6366, 1490, 1613, 7057	474	137	9095	4.48181	8.99492e-09	4.28329e-10	3.56952e-09
GOTERM_BP_FAT	GO:2000026~regulation of multicellular organismal development	104	20.1161	3.05807e-12	91663, 1290, 57343, 8742, 2335, 25960, 6423, 3678, 4212, 1289, 4920, 8877, 5740, 5159, 2200, 51564, 90627, 1281, 1284, 5176, 4035, 3716, 55959, 7070, 3491, 6695, 7075, 2331, 7077, 1490, 3400, 1277, 7076, 3910, 338773, 2621, 1435, 55727, 23531, 8861, 56172, 3213, 10272, 10521, 6678, 7041, 728, 89927, 10082, 7424, 54681, 57158, 23098, 6586, 7043, 411, 56975, 92, 90, 1116, 5054, 7431, 85458, 6387, 1…	474	1003	9095	1.98956	1.45933e-08	6.63332e-10	5.79117e-09
GOTERM_CC_FAT	GO:0043292~contractile fiber	29	5.60928	3.13314e-12	59, 2318, 800, 2316, 114907, 55742, 10979, 10398, 7169, 7168, 2275, 4659, 87, 25802, 57158, 171024, 23022, 4313, 91624, 5175, 3611, 23345, 115557, 27295, 1674, 4629, 7171, 70, 23336	433	117	8480	4.85423	1.51958e-09	1.68842e-10	4.49255e-09
GOTERM_BP_FAT	GO:0009887~organ morphogenesis	72	13.9265	3.27277e-12	5066, 2006, 1290, 1296, 2702, 55742, 2252, 6423, 1311, 7122, 166336, 4256, 115908, 7168, 8642, 4920, 1289, 80781, 2200, 5159, 4313, 1281, 23213, 57493, 3611, 55959, 23162, 2260, 3491, 7070, 8828, 1490, 3400, 1277, 70, 1278, 72, 9645, 6935, 860, 1435, 59, 55727, 51715, 2033, 3213, 56034, 22856, 54829, 2273, 4638, 7089, 7424, 5654, 10082, 83552, 4782, 4323, 6586, 7043, 56975, 5156, 3371, 90, 1301, …	474	575	9095	2.40264	1.56179e-08	6.7904e-10	6.19778e-09
GOTERM_BP_FAT	GO:0040012~regulation of locomotion	65	12.5725	4.02281e-12	91663, 83700, 5919, 57343, 2335, 127435, 2252, 25960, 6423, 7168, 131578, 3678, 4920, 8877, 80781, 5159, 51564, 90627, 1281, 91624, 25932, 5175, 4035, 23213, 5176, 5170, 3611, 2260, 3685, 3491, 7070, 11188, 6366, 8828, 7075, 1277, 3910, 7076, 1613, 2621, 4681, 63940, 1435, 8861, 56034, 2316, 1809, 6678, 3071, 728, 89927, 4638, 10631, 7424, 104, 4323, 411, 5156, 90, 26585, 5054, 6387, 152007, 1634…	474	491	9095	2.54013	1.91967e-08	7.99863e-10	7.61797e-09
GOTERM_BP_FAT	GO:0016477~cell migration	84	16.2476	5.50035e-12	91663, 83700, 5919, 57343, 55742, 2335, 8742, 2252, 127435, 25960, 6423, 115908, 7168, 131578, 8642, 3678, 10487, 1289, 4920, 8877, 80781, 22801, 2191, 5159, 51564, 90627, 1281, 23022, 25932, 5175, 5176, 4035, 23213, 5170, 3611, 3716, 2260, 3685, 7412, 3491, 11188, 7070, 6366, 8828, 6695, 7075, 1490, 1277, 7076, 1278, 1613, 2621, 4681, 63940, 1435, 56034, 2316, 7145, 1809, 6678, 3071, 728, 89927,…	474	737	9095	2.18694	2.62478e-08	1.04991e-09	1.04161e-08
GOTERM_BP_FAT	GO:0040011~locomotion	95	18.3752	9.03094e-12	91663, 83700, 5919, 57343, 55742, 8742, 2335, 2252, 127435, 25960, 6423, 115908, 7168, 131578, 8642, 3678, 10487, 1289, 4920, 8877, 80781, 22801, 2191, 5329, 5159, 51564, 90627, 1281, 23022, 91624, 25932, 5175, 5176, 4035, 23213, 5170, 3611, 3716, 23162, 2260, 3685, 7412, 3491, 11188, 7070, 6366, 8828, 3913, 6695, 2331, 7075, 1490, 1277, 7076, 3910, 1278, 1613, 4681, 2621, 63940, 1435, 4684, 8861…	474	894	9095	2.03897	4.30959e-08	1.65754e-09	1.71021e-08
GOTERM_BP_FAT	GO:0001503~ossification	40	7.73694	1.23059e-11	860, 1290, 1291, 56172, 10272, 9923, 1009, 22856, 6423, 54829, 9902, 6678, 9260, 90993, 4256, 115908, 8642, 22801, 1462, 4323, 7043, 51564, 56975, 4313, 79176, 92, 90, 3371, 1301, 3611, 1300, 26585, 1513, 3491, 25884, 1277, 3400, 1490, 7171, 338773	474	222	9095	3.45725	5.87234e-08	2.17494e-09	2.33036e-08
GOTERM_MF_FAT	GO:0005539~glycosaminoglycan binding	26	5.02901	1.63663e-11	64094, 2335, 2252, 145864, 1311, 1809, 10631, 4053, 83716, 1289, 151887, 1462, 6586, 2200, 5118, 6649, 633, 5549, 2260, 23166, 3491, 8828, 2331, 1490, 1634, 7057	442	97	8380	5.08187	1.38295e-08	3.45737e-09	2.53028e-08
GOTERM_BP_FAT	GO:0048870~cell motility	87	16.8279	3.19215e-11	91663, 83700, 5919, 57343, 55742, 2335, 8742, 2252, 127435, 25960, 6423, 115908, 7168, 131578, 8642, 3678, 10487, 1289, 4920, 8877, 80781, 22801, 2191, 5159, 51564, 90627, 1281, 23022, 91624, 25932, 5175, 5176, 4035, 23213, 5170, 3611, 3716, 2260, 3685, 7412, 3491, 11188, 7070, 6366, 8828, 6695, 7075, 1490, 1277, 7076, 3910, 1278, 1613, 4681, 2621, 63940, 1435, 8861, 56034, 2316, 7145, 1809, 6678…	474	803	9095	2.07887	1.52329e-07	5.44033e-09	6.04499e-08
GOTERM_BP_FAT	GO:0051674~localization of cell	87	16.8279	3.19215e-11	91663, 83700, 5919, 57343, 55742, 2335, 8742, 2252, 127435, 25960, 6423, 115908, 7168, 131578, 8642, 3678, 10487, 1289, 4920, 8877, 80781, 22801, 2191, 5159, 51564, 90627, 1281, 23022, 91624, 25932, 5175, 5176, 4035, 23213, 5170, 3611, 3716, 2260, 3685, 7412, 3491, 11188, 7070, 6366, 8828, 6695, 7075, 1490, 1277, 7076, 3910, 1278, 1613, 4681, 2621, 63940, 1435, 8861, 56034, 2316, 7145, 1809, 6678…	474	803	9095	2.07887	1.52329e-07	5.44033e-09	6.04499e-08
GOTERM_MF_FAT	GO:0019838~growth factor binding	25	4.83559	6.64865e-11	7837, 1281, 1291, 5156, 92, 90, 3487, 94031, 2260, 3685, 2, 3490, 3491, 8828, 5654, 1277, 4053, 1490, 4054, 1289, 135228, 1278, 7057, 5159, 7043	442	95	8380	4.98928	5.61811e-08	1.12362e-08	1.02791e-07
GOTERM_CC_FAT	GO:0030016~myofibril	26	5.02901	1.0227e-10	800, 2318, 2316, 114907, 55742, 10979, 10398, 7169, 7168, 2275, 4659, 87, 25802, 57158, 171024, 23022, 4313, 91624, 3611, 23345, 115557, 27295, 1674, 7171, 70, 23336	433	108	8480	4.71474	4.9601e-08	4.9601e-09	1.46642e-07
GOTERM_CC_FAT	GO:0030017~sarcomere	24	4.64217	1.10405e-10	4313, 23022, 91624, 2318, 55742, 2316, 114907, 10979, 3611, 10398, 23345, 27295, 115557, 7169, 7168, 1674, 2275, 4659, 7171, 70, 87, 25802, 57158, 171024	433	92	8480	5.10895	5.35462e-08	4.86784e-09	1.58306e-07
GOTERM_BP_FAT	GO:0006936~muscle contraction	30	5.80271	1.70355e-10	59, 1760, 2702, 800, 2316, 10580, 10398, 5350, 7169, 7168, 4638, 8877, 25802, 1264, 3672, 23213, 8082, 55959, 3693, 1909, 7431, 5997, 1674, 1490, 4629, 7171, 70, 23336, 72, 1613	474	143	9095	4.0254	8.12934e-07	2.80322e-08	3.22602e-07
GOTERM_CC_FAT	GO:0005604~basement membrane	20	3.86847	2.57947e-10	1306, 64094, 1296, 1284, 22795, 5176, 3339, 3371, 2335, 6678, 4811, 3913, 1289, 7076, 3910, 80781, 151887, 7045, 4016, 2200	433	65	8480	6.02594	1.25104e-07	1.04253e-08	3.69863e-07
GOTERM_BP_FAT	GO:0003012~muscle system process	35	6.76983	2.8764e-10	59, 2702, 1760, 800, 2316, 114907, 10580, 10398, 5350, 126393, 7169, 7168, 4638, 29995, 8877, 25802, 1264, 3672, 23213, 11214, 8082, 55959, 3693, 309, 7431, 1909, 5997, 1674, 1490, 4629, 7171, 23336, 70, 72, 1613	474	194	9095	3.46171	1.37261e-06	4.57539e-08	5.44705e-07
GOTERM_BP_FAT	GO:0030199~collagen fibril organization	14	2.70793	3.16316e-10	1290, 1281, 1301, 26585, 6423, 1805, 4060, 2331, 9509, 1277, 1289, 1278, 4015, 4320	474	28	9095	9.59388	1.50946e-06	4.86923e-08	5.9901e-07
KEGG_PATHWAY	hsa05414:Dilated cardiomyopathy	15	2.90135	3.52796e-10	3672, 6443, 3693, 5350, 3685, 7169, 7168, 1674, 3679, 3678, 7171, 70, 22801, 60, 7043	177	39	3999	8.6897	6.73841e-08	2.24614e-08	4.38858e-07
GOTERM_BP_FAT	GO:0048468~cell development	103	19.9226	6.06724e-10	91663, 83700, 1191, 55742, 2335, 1009, 25960, 6423, 7168, 5159, 2200, 1281, 5175, 5176, 4035, 5170, 5549, 55959, 1909, 3685, 7070, 6366, 3913, 6695, 2331, 7077, 3400, 1277, 1435, 23531, 2318, 3213, 2316, 22856, 7041, 89927, 7424, 83552, 25802, 23098, 6586, 7043, 411, 91653, 56975, 5156, 90, 1301, 10417, 7431, 85458, 6387, 152007, 4629, 7122, 115908, 23373, 4659, 80781, 87, 6925, 80279, 23022, 916…	474	1081	9095	1.82825	2.89528e-06	9.04777e-08	1.14896e-06
GOTERM_MF_FAT	GO:0050840~extracellular matrix binding	16	3.09478	6.20534e-10	2006, 8404, 633, 1301, 6678, 3685, 3956, 3491, 131578, 4811, 25903, 2199, 1634, 7045, 7057, 284297	442	40	8380	7.58371	5.24351e-07	8.73918e-08	9.59369e-07
GOTERM_BP_FAT	GO:0070848~response to growth factor	54	10.4449	7.34911e-10	7791, 2252, 25960, 6423, 7122, 3678, 4212, 4920, 2200, 6925, 5159, 2619, 1281, 1284, 23213, 5170, 3611, 55959, 3693, 2260, 7412, 3491, 8828, 2331, 1490, 1277, 1278, 6935, 2621, 4681, 860, 10272, 10979, 54829, 6678, 7041, 10631, 5654, 7424, 4053, 7043, 56975, 56937, 79176, 5156, 92, 90, 3371, 94031, 26585, 4060, 1634, 135228, 7057	474	415	9095	2.49672	3.50699e-06	1.06273e-07	1.39171e-06
GOTERM_MF_FAT	GO:0032403~protein complex binding	65	12.5725	8.01239e-10	83700, 2335, 10580, 127435, 6423, 1311, 7456, 7169, 7168, 114897, 131578, 3678, 1289, 22801, 87, 2191, 2200, 1281, 91624, 5118, 4035, 8404, 5170, 3611, 7412, 1513, 3491, 11188, 7070, 3913, 7077, 1490, 7171, 84939, 2212, 2318, 22795, 2316, 10272, 54829, 6678, 9902, 3071, 60, 7045, 1508, 64175, 4323, 1307, 10516, 3672, 51585, 92, 90, 23345, 7431, 4811, 4060, 4629, 23336, 1634, 84168, 7106, 4240, 70…	442	550	8380	2.24064	6.77047e-07	9.6721e-08	1.23875e-06
GOTERM_CC_FAT	GO:0005925~focal adhesion	49	9.47776	8.59169e-10	55742, 3339, 10580, 7791, 10487, 3678, 4659, 22801, 87, 5329, 2191, 171024, 5159, 23022, 91624, 10867, 4035, 5170, 3611, 3716, 309, 3693, 3685, 7070, 4026, 70, 7171, 2318, 2316, 10979, 7145, 9902, 9260, 7041, 2273, 7089, 2275, 60, 4323, 3672, 1264, 1465, 3371, 85458, 7431, 7052, 55679, 91179, 7106	433	365	8480	2.62912	4.16697e-07	3.20536e-08	1.23194e-06
GOTERM_CC_FAT	GO:0005924~cell-substrate adherens junction	49	9.47776	9.44869e-10	55742, 3339, 10580, 7791, 10487, 3678, 4659, 22801, 87, 5329, 2191, 171024, 5159, 23022, 91624, 10867, 4035, 5170, 3611, 3716, 309, 3693, 3685, 7070, 4026, 70, 7171, 2318, 2316, 10979, 7145, 9902, 9260, 7041, 2273, 7089, 2275, 60, 4323, 3672, 1264, 1465, 3371, 85458, 7431, 7052, 55679, 91179, 7106	433	366	8480	2.62194	4.58261e-07	3.2733e-08	1.35482e-06
GOTERM_CC_FAT	GO:0031093~platelet alpha granule lumen	14	2.70793	1.15902e-09	2621, 3671, 1191, 2335, 6678, 5054, 2, 7424, 2162, 7076, 710, 87, 7057, 7043	433	31	8480	8.84452	5.62125e-07	3.7475e-08	1.66189e-06
GOTERM_CC_FAT	GO:0030055~cell-substrate junction	49	9.47776	1.49815e-09	55742, 3339, 10580, 7791, 10487, 3678, 4659, 22801, 87, 5329, 2191, 171024, 5159, 23022, 91624, 10867, 4035, 5170, 3611, 3716, 309, 3693, 3685, 7070, 4026, 70, 7171, 2318, 2316, 10979, 7145, 9902, 9260, 7041, 2273, 7089, 2275, 60, 4323, 3672, 1264, 1465, 3371, 85458, 7431, 7052, 55679, 91179, 7106	433	371	8480	2.58661	7.266e-07	4.54125e-08	2.14815e-06
GOTERM_BP_FAT	GO:0061448~connective tissue development	28	5.41586	1.70573e-09	860, 1435, 59, 3213, 22856, 6423, 1311, 4256, 1289, 4920, 7045, 5159, 23213, 1301, 1300, 55959, 26585, 1116, 2260, 3491, 5396, 25884, 4060, 1277, 3400, 1490, 7076, 6935	474	138	9095	3.89317	8.13972e-06	2.39405e-07	3.23016e-06
KEGG_PATHWAY	hsa04151:PI3K-Akt signaling pathway	32	6.18956	1.77332e-09	1292, 1293, 1290, 1435, 1291, 56034, 2335, 2252, 1311, 90993, 7424, 3679, 3678, 1289, 22801, 5159, 1281, 3672, 5156, 1284, 3371, 5170, 1301, 3716, 3693, 2260, 3685, 3913, 1277, 3910, 1278, 7057	177	215	3999	3.36271	3.38703e-07	8.46759e-08	2.2059e-06
GOTERM_CC_FAT	GO:0034774~secretory granule lumen	15	2.90135	3.00933e-09	2621, 3671, 5919, 1191, 2335, 6678, 5054, 2, 7424, 2162, 7076, 710, 87, 7057, 7043	433	39	8480	7.53242	1.45953e-06	8.58545e-08	4.315e-06
KEGG_PATHWAY	hsa05410:Hypertrophic cardiomyopathy (HCM)	14	2.70793	3.09563e-09	3685, 7169, 7168, 6443, 3672, 1674, 3679, 3678, 7171, 70, 22801, 60, 3693, 7043	177	38	3999	8.32382	5.91265e-07	1.18253e-07	3.85078e-06
GOTERM_BP_FAT	GO:0090287~regulation of cellular response to growth factor stimulus	29	5.60928	4.12554e-09	4681, 860, 10272, 25960, 6423, 54829, 7041, 5654, 7424, 3678, 7043, 6925, 2200, 56975, 56937, 79176, 92, 23213, 5170, 3611, 94031, 55959, 26585, 2260, 3491, 1634, 135228, 6935, 7057	474	153	9095	3.6369	1.96869e-05	5.62488e-07	7.81257e-06
KEGG_PATHWAY	hsa04974:Protein digestion and absorption	14	2.70793	4.46705e-09	1292, 1306, 1293, 1281, 2006, 1290, 1291, 1284, 1301, 1300, 1277, 1289, 80781, 1278	177	39	3999	8.11039	8.53206e-07	1.42201e-07	5.55675e-06
GOTERM_BP_FAT	GO:0071363~cellular response to growth factor stimulus	51	9.8646	5.27147e-09	7791, 2252, 25960, 6423, 7122, 3678, 4920, 2200, 6925, 5159, 2619, 1281, 1284, 23213, 5170, 3611, 55959, 3693, 2260, 7412, 3491, 8828, 2331, 1490, 1277, 1278, 6935, 2621, 4681, 860, 10272, 10979, 6678, 54829, 7041, 10631, 5654, 7424, 4053, 7043, 56975, 56937, 79176, 5156, 92, 90, 94031, 26585, 1634, 135228, 7057	474	401	9095	2.44034	2.51551e-05	6.98762e-07	9.98262e-06
GOTERM_CC_FAT	GO:0098644~complex of collagen trimers	11	2.12766	6.48972e-09	1293, 1281, 1290, 1291, 1284, 4060, 1277, 1634, 1289, 1301, 1278	433	19	8480	11.3383	3.14751e-06	1.74862e-07	9.30543e-06
GOTERM_MF_FAT	GO:0005509~calcium ion binding	44	8.51064	7.88391e-09	2621, 5066, 64094, 10873, 22795, 3339, 1009, 22918, 8639, 10398, 1311, 54829, 6678, 23208, 4256, 57333, 8642, 2199, 4053, 4054, 1462, 54681, 87, 4323, 2200, 6586, 10516, 56975, 813, 5320, 23213, 4035, 57493, 8404, 55959, 309, 23166, 716, 6695, 4811, 715, 7171, 7057, 4320	442	318	8380	2.6233	6.66188e-06	8.32738e-07	1.21888e-05
GOTERM_MF_FAT	GO:0008201~heparin binding	20	3.86847	8.08813e-09	64094, 5118, 6649, 5549, 2335, 2252, 1311, 2260, 3491, 8828, 10631, 2331, 4053, 1490, 83716, 1289, 151887, 7057, 2200, 6586	442	76	8380	4.98928	6.83445e-06	7.59386e-07	1.25046e-05
GOTERM_CC_FAT	GO:0009986~cell surface	49	9.47776	1.01782e-08	5066, 1191, 25960, 8639, 161198, 3679, 3678, 2191, 5159, 4360, 8406, 25932, 5175, 57493, 23213, 633, 55959, 3693, 7132, 7412, 929, 3685, 3956, 7070, 7077, 10267, 4684, 56034, 10979, 7145, 22918, 6678, 728, 4638, 558, 411, 7043, 54587, 3672, 92, 26585, 6387, 2687, 118429, 84168, 135228, 4240, 6424, 7057	433	393	8480	2.44181	4.9364e-06	2.59811e-07	1.45942e-05
GOTERM_BP_FAT	GO:0051216~cartilage development	23	4.44874	1.25662e-08	860, 3213, 23213, 1301, 1300, 22856, 6423, 55959, 26585, 1116, 1311, 2260, 4256, 5396, 3491, 25884, 4060, 1277, 1490, 7076, 4920, 7045, 6935	474	104	9095	4.24345	5.99639e-05	1.62069e-06	2.37966e-05
GOTERM_CC_FAT	GO:0005788~endoplasmic reticulum lumen	25	4.83559	1.57608e-08	2621, 1292, 1293, 1290, 1291, 1296, 493869, 56034, 57333, 1289, 80781, 64175, 5329, 411, 1307, 1306, 813, 1281, 1284, 1301, 1300, 10418, 1277, 1278, 7057	433	126	8480	3.88577	7.64397e-06	3.822e-07	2.2599e-05
GOTERM_BP_FAT	GO:0030335~positive regulation of cell migration	38	7.3501	1.64696e-08	91663, 2621, 63940, 1435, 5919, 57343, 56034, 2335, 2252, 25960, 6678, 3071, 728, 131578, 4638, 10631, 7424, 3678, 4920, 8877, 80781, 4323, 5159, 51564, 5156, 90, 3611, 5054, 2260, 6387, 3685, 152007, 3491, 6366, 8828, 1277, 1613, 7057	474	259	9095	2.81519	7.859e-05	2.06824e-06	3.11887e-05
GOTERM_BP_FAT	GO:0009611~response to wounding	49	9.47776	2.13671e-08	83700, 2004, 2335, 2252, 10398, 23208, 7168, 114897, 3678, 1289, 87, 5329, 2191, 5159, 1281, 5175, 5170, 3611, 55959, 2, 3956, 3491, 3913, 9215, 25970, 1490, 1277, 7076, 2162, 1278, 2621, 2316, 56034, 6678, 1809, 4638, 10631, 558, 60, 4015, 7043, 5156, 1465, 3371, 5054, 1634, 135228, 710, 7057	474	393	9095	2.39237	0.000101959	2.61445e-06	4.04631e-05
GOTERM_CC_FAT	GO:0031091~platelet alpha granule	15	2.90135	2.5108e-08	2621, 3671, 1191, 5175, 2335, 6678, 5054, 2, 7424, 2162, 7076, 710, 87, 7057, 7043	433	45	8480	6.5281	1.21773e-05	5.79875e-07	3.60017e-05
GOTERM_BP_FAT	GO:2000147~positive regulation of cell motility	38	7.3501	3.06846e-08	91663, 2621, 63940, 1435, 5919, 57343, 56034, 2335, 2252, 25960, 6678, 3071, 728, 131578, 4638, 10631, 7424, 3678, 4920, 8877, 80781, 4323, 5159, 51564, 5156, 90, 3611, 5054, 2260, 6387, 3685, 152007, 3491, 6366, 8828, 1277, 1613, 7057	474	265	9095	2.75145	0.000146416	3.66067e-06	5.81076e-05
GOTERM_BP_FAT	GO:0007178~transmembrane receptor protein serine/threonine kinase signaling pathway	32	6.18956	3.28542e-08	4681, 860, 10979, 10272, 7791, 6423, 7122, 54829, 7041, 5654, 4053, 4920, 7043, 2200, 56937, 1281, 79176, 92, 23213, 90, 5170, 3611, 94031, 26585, 3693, 7431, 3491, 2331, 135228, 1278, 6935, 7057	474	199	9095	3.08547	0.000156768	3.82391e-06	6.22163e-05
GOTERM_BP_FAT	GO:0022603~regulation of anatomical structure morphogenesis	70	13.5397	3.32946e-08	91663, 1290, 57343, 55742, 2335, 8742, 2252, 25960, 6423, 149041, 7456, 166336, 115908, 7168, 3679, 9204, 3678, 4920, 8877, 1289, 5740, 6925, 51564, 90627, 1284, 23213, 5176, 3611, 3716, 55959, 8831, 2260, 23166, 7070, 2331, 7075, 1277, 1613, 860, 1435, 55727, 2316, 10979, 54829, 6678, 1808, 7041, 728, 10631, 7424, 10082, 4131, 23098, 6586, 7043, 755, 11214, 90, 26585, 192670, 1116, 5054, 6387, 1…	474	678	9095	1.98104	0.000158869	3.78289e-06	6.30502e-05
GOTERM_BP_FAT	GO:0045595~regulation of cell differentiation	85	16.441	3.84077e-08	91663, 1290, 5919, 1760, 2335, 25960, 6423, 149041, 7122, 115908, 23373, 4212, 4659, 1289, 1827, 2200, 6925, 80279, 51564, 1281, 5320, 5176, 4035, 3611, 23162, 8831, 7132, 2260, 3685, 3956, 3491, 6938, 7070, 6695, 2331, 1490, 3400, 7077, 1277, 338773, 6935, 4320, 2621, 4681, 860, 1435, 23531, 8861, 3213, 22890, 2316, 10272, 10521, 1809, 9260, 1808, 3071, 7041, 89927, 10631, 7424, 558, 4054, 54681…	474	896	9095	1.82027	0.000183265	4.26235e-06	7.27328e-05
GOTERM_BP_FAT	GO:0022617~extracellular matrix disassembly	17	3.2882	3.98549e-08	2006, 4313, 3339, 2335, 1513, 2, 4811, 5654, 7177, 7077, 1634, 7076, 9507, 2191, 4323, 2200, 4320	474	60	9095	5.43653	0.000190169	4.32244e-06	7.54735e-05
GOTERM_BP_FAT	GO:0040017~positive regulation of locomotion	38	7.3501	4.18682e-08	91663, 2621, 63940, 1435, 5919, 57343, 56034, 2335, 2252, 25960, 6678, 3071, 728, 131578, 4638, 10631, 7424, 3678, 4920, 8877, 80781, 4323, 5159, 51564, 5156, 90, 3611, 5054, 2260, 6387, 3685, 152007, 3491, 6366, 8828, 1277, 1613, 7057	474	268	9095	2.72065	0.000199775	4.43988e-06	7.9286e-05
GOTERM_BP_FAT	GO:0061061~muscle structure development	44	8.51064	4.82639e-08	1293, 2006, 6443, 1760, 2318, 2033, 9242, 1106, 10290, 8038, 10521, 7168, 2273, 4638, 2275, 3679, 22801, 25802, 1827, 57158, 4323, 5159, 91653, 1281, 91624, 57496, 5156, 11214, 57493, 90, 1301, 3611, 26585, 165, 23345, 2260, 3956, 6938, 6876, 9215, 4629, 1634, 70, 6935	474	341	9095	2.47584	0.000230289	5.00684e-06	9.13977e-05
GOTERM_BP_FAT	GO:0010810~regulation of cell-substrate adhesion	25	4.83559	6.1587e-08	91663, 1307, 64094, 1435, 8861, 2316, 11117, 2335, 3611, 26585, 5054, 3956, 3491, 6695, 6366, 4811, 10631, 7424, 2199, 3678, 1277, 151887, 1613, 7057, 4323	474	132	9095	3.63405	0.00029385	6.25303e-06	0.000116628
GOTERM_BP_FAT	GO:0051272~positive regulation of cellular component movement	38	7.3501	6.71539e-08	91663, 2621, 63940, 1435, 5919, 57343, 56034, 2335, 2252, 25960, 6678, 3071, 728, 131578, 4638, 10631, 7424, 3678, 4920, 8877, 80781, 4323, 5159, 51564, 5156, 90, 3611, 5054, 2260, 6387, 3685, 152007, 3491, 6366, 8828, 1277, 1613, 7057	474	273	9095	2.67082	0.000320407	6.6762e-06	0.00012717
GOTERM_BP_FAT	GO:0003008~system process	67	12.9594	9.49413e-08	83700, 2006, 1760, 2702, 800, 10580, 10398, 7122, 126393, 7169, 7168, 114897, 23373, 3678, 4212, 29995, 8877, 80781, 1827, 57493, 5176, 5742, 23213, 55959, 309, 8831, 3693, 27129, 2260, 1909, 11188, 3913, 1490, 10725, 1277, 7171, 70, 1278, 72, 1613, 2621, 59, 2316, 114907, 5350, 728, 4638, 10631, 7424, 83552, 7045, 25802, 3672, 1264, 11214, 8082, 1301, 7431, 6387, 5997, 1674, 4060, 358, 4629, 233…	474	654	9095	1.96572	0.000452957	9.24608e-06	0.000179791
GOTERM_CC_FAT	GO:0060205~cytoplasmic membrane-bounded vesicle lumen	15	2.90135	1.46734e-07	2621, 3671, 5919, 1191, 2335, 6678, 5054, 2, 7424, 2162, 7076, 710, 87, 7057, 7043	433	51	8480	5.76009	7.11637e-05	3.23482e-06	0.000210398
GOTERM_BP_FAT	GO:0042060~wound healing	42	8.12379	1.65466e-07	2621, 2004, 56034, 2316, 2335, 10398, 6678, 23208, 7168, 114897, 4638, 10631, 558, 3678, 1289, 60, 87, 5329, 4015, 2191, 7043, 5159, 1281, 1465, 5156, 5175, 3371, 5170, 3611, 5054, 2, 3491, 9215, 25970, 1277, 7076, 2162, 1634, 135228, 1278, 710, 7057	474	331	9095	2.4347	0.000789291	1.57919e-05	0.000313343
GOTERM_CC_FAT	GO:0031983~vesicle lumen	15	2.90135	1.91586e-07	2621, 3671, 5919, 1191, 2335, 6678, 5054, 2, 7424, 2162, 7076, 710, 87, 7057, 7043	433	52	8480	5.64932	9.29149e-05	4.03996e-06	0.00027471
GOTERM_BP_FAT	GO:0045765~regulation of angiogenesis	25	4.83559	2.25014e-07	57343, 8742, 25960, 6423, 6678, 728, 7424, 3678, 8877, 5740, 6925, 51564, 90627, 1284, 23213, 5176, 26585, 3716, 1116, 5054, 23166, 7075, 358, 1634, 7057	474	141	9095	3.40209	0.00107319	2.1054e-05	0.00042611
GOTERM_BP_FAT	GO:0002576~platelet degranulation	17	3.2882	2.65984e-07	2621, 3671, 5919, 1191, 5175, 2316, 2335, 6678, 5054, 2, 7424, 2162, 7076, 710, 87, 7057, 7043	474	68	9095	4.79694	0.00126847	2.44089e-05	0.000503695
GOTERM_BP_FAT	GO:0035987~endodermal cell differentiation	12	2.32108	4.57368e-07	3685, 4313, 1290, 1291, 1284, 3679, 3678, 2335, 1289, 1301, 3693, 4323	474	33	9095	6.97737	0.00218018	4.11795e-05	0.000866117
GOTERM_BP_FAT	GO:0051240~positive regulation of multicellular organismal process	74	14.3133	5.32214e-07	57343, 1191, 2702, 2335, 8742, 2252, 25960, 6423, 90993, 115908, 7168, 114897, 23373, 3678, 8877, 5740, 6925, 5159, 51564, 57496, 57493, 5176, 23213, 3611, 3716, 55959, 23162, 2260, 929, 3956, 3491, 6938, 8828, 1490, 3400, 7077, 1277, 338773, 6935, 2621, 4681, 860, 63940, 1435, 23531, 2033, 22890, 1809, 6678, 9260, 3071, 7041, 728, 10631, 7424, 558, 4131, 4323, 411, 7043, 56975, 92, 90, 26585, 10…	474	787	9095	1.80419	0.0025365	4.70309e-05	0.00100785
GOTERM_MF_FAT	GO:1901681~sulfur compound binding	23	4.44874	5.4797e-07	3712, 64094, 5118, 6649, 5549, 2335, 2252, 1311, 1809, 2260, 3491, 8828, 10631, 10082, 2331, 4053, 1490, 1289, 83716, 151887, 7057, 2200, 6586	442	126	8380	3.46082	0.000462928	4.63024e-05	0.000847179
GOTERM_CC_FAT	GO:0031674~I band	16	3.09478	6.27277e-07	23022, 91624, 2318, 55742, 114907, 2316, 10979, 10398, 27295, 1674, 2275, 4659, 70, 87, 57158, 171024	433	65	8480	4.82075	0.000304183	1.26762e-05	0.000899433
GOTERM_BP_FAT	GO:0030029~actin filament-based process	50	9.67118	6.33003e-07	5066, 91663, 83700, 2006, 2702, 55742, 2316, 55160, 10580, 2252, 7791, 1809, 7456, 5350, 9260, 3071, 7169, 7168, 2275, 10487, 112464, 87, 25802, 5159, 171024, 7043, 23022, 1264, 5156, 4035, 11214, 5170, 3611, 3693, 7431, 27295, 85458, 6387, 152273, 11188, 1674, 6366, 358, 4629, 1490, 7171, 84168, 70, 1613, 9645	474	452	9095	2.12254	0.00301613	5.49202e-05	0.00119872
GOTERM_BP_FAT	GO:1901342~regulation of vasculature development	25	4.83559	1.05814e-06	57343, 8742, 25960, 6423, 6678, 728, 7424, 3678, 8877, 5740, 6925, 51564, 90627, 1284, 23213, 5176, 26585, 3716, 1116, 5054, 23166, 7075, 358, 1634, 7057	474	153	9095	3.13526	0.00503672	9.01647e-05	0.00200379
GOTERM_BP_FAT	GO:0030155~regulation of cell adhesion	46	8.89749	1.42345e-06	91663, 1435, 64094, 8861, 22890, 2316, 10272, 2335, 6423, 149041, 3071, 7168, 114897, 10631, 7424, 2199, 3678, 4659, 151887, 7045, 4323, 11326, 9891, 1307, 2615, 3371, 11117, 5170, 3611, 26585, 5054, 3685, 6387, 7412, 3956, 3491, 7052, 7070, 6695, 6366, 4811, 1277, 3910, 1613, 6935, 7057	474	411	9095	2.14754	0.00676969	0.000119163	0.00269557
GOTERM_BP_FAT	GO:0007167~enzyme linked receptor protein signaling pathway	61	11.7988	1.53923e-06	10580, 7791, 2252, 25960, 6423, 7122, 3678, 4920, 5329, 29990, 2200, 5159, 4313, 1281, 1284, 4035, 23213, 5170, 3611, 3487, 3716, 55959, 3693, 2260, 3685, 10628, 3491, 8828, 2331, 1490, 1278, 6935, 2621, 4681, 860, 1435, 56034, 10272, 10979, 54829, 7041, 3071, 7424, 558, 5654, 4053, 60, 8483, 7043, 56937, 79176, 3672, 5156, 92, 90, 94031, 26585, 7431, 1634, 135228, 7057	474	619	9095	1.89088	0.0073183	0.000126633	0.00291481
GOTERM_BP_FAT	GO:0007166~cell surface receptor signaling pathway	119	23.0174	1.68938e-06	57343, 8742, 25960, 6423, 3679, 3678, 8877, 4920, 22801, 5159, 2200, 29990, 4313, 1281, 1284, 8406, 4035, 5170, 3487, 3716, 55959, 3693, 7412, 929, 3685, 10628, 7070, 3491, 6366, 2331, 27327, 1277, 1490, 90139, 1278, 1613, 2212, 2621, 1435, 8861, 4775, 56034, 2316, 10272, 22856, 8038, 5350, 7041, 728, 7424, 10082, 23112, 6586, 7043, 1307, 91653, 5156, 92, 90, 192670, 5054, 7431, 85458, 6387, 7052…	474	1518	9095	1.50418	0.00802933	0.00013663	0.00319915
GOTERM_CC_FAT	GO:0005796~Golgi lumen	12	2.32108	1.82103e-06	2621, 6649, 4060, 10082, 2331, 633, 3339, 5549, 1634, 1462, 4323, 4320	433	38	8480	6.18451	0.00088281	3.53274e-05	0.00261109
GOTERM_BP_FAT	GO:0030336~negative regulation of cell migration	24	4.64217	1.85904e-06	4681, 1281, 90627, 25932, 23213, 5176, 4035, 127435, 3611, 6423, 26585, 5054, 1809, 6387, 89927, 11188, 7168, 7070, 6366, 7075, 7076, 1634, 104, 7057	474	147	9095	3.1327	0.00883213	0.000147845	0.00352043
GOTERM_BP_FAT	GO:0060348~bone development	21	4.0619	1.87682e-06	56975, 860, 51715, 2033, 23213, 11214, 56034, 1300, 22856, 6423, 55959, 26585, 1311, 6678, 8642, 1277, 338773, 64175, 4323, 2200, 7043	474	116	9095	3.47365	0.00891619	0.000146812	0.00355408
GOTERM_BP_FAT	GO:0090288~negative regulation of cellular response to growth factor stimulus	18	3.48162	1.87761e-06	4681, 56937, 23213, 5170, 10272, 25960, 55959, 26585, 94031, 6423, 54829, 7041, 5654, 1634, 135228, 7057, 2200, 7043	474	87	9095	3.96988	0.00891995	0.000144505	0.00355559
GOTERM_BP_FAT	GO:0002688~regulation of leukocyte chemotaxis	14	2.70793	2.14407e-06	4681, 2621, 83700, 63940, 5919, 1435, 26585, 5054, 3071, 6387, 728, 6366, 7424, 7057	474	53	9095	5.06847	0.0101794	0.000162392	0.00406017
GOTERM_BP_FAT	GO:0009966~regulation of signal transduction	132	25.5319	2.2583e-06	91663, 1191, 8742, 2335, 25960, 6423, 440503, 90993, 114897, 51776, 3678, 29995, 8877, 112464, 4920, 5740, 1827, 5159, 2200, 51564, 90627, 1281, 4194, 8406, 5175, 4035, 8490, 5170, 3487, 3716, 55959, 3685, 2, 929, 23263, 7070, 3491, 6366, 25970, 1277, 10725, 7077, 1490, 7076, 1613, 2621, 1435, 56034, 55160, 2316, 10272, 22856, 10521, 5350, 7041, 728, 7424, 51306, 57158, 23098, 6586, 7043, 9891, 5…	474	1742	9095	1.45395	0.0107188	0.000168371	0.00427648
GOTERM_BP_FAT	GO:0007517~muscle organ development	28	5.41586	2.50695e-06	1293, 2006, 6443, 9242, 2033, 1106, 10290, 10521, 7168, 2273, 4638, 2275, 3679, 22801, 57158, 1827, 1281, 57496, 57493, 1301, 26585, 165, 2260, 6938, 6876, 9215, 1634, 70	474	194	9095	2.76937	0.0118919	0.000184032	0.00474731
GOTERM_BP_FAT	GO:0007229~integrin-mediated signaling pathway	16	3.09478	2.72511e-06	1307, 3685, 1281, 3672, 57343, 55679, 3679, 3678, 2316, 1490, 10979, 7791, 22801, 3611, 8038, 3693	474	71	9095	4.324	0.0129201	0.000197015	0.00516044
GOTERM_CC_FAT	GO:0005583~fibrillar collagen trimer	7	1.35397	2.9782e-06	1281, 1290, 4060, 1277, 1289, 1301, 1278	433	10	8480	13.709	0.00144339	5.55535e-05	0.00427028
GOTERM_CC_FAT	GO:0098643~banded collagen fibril	7	1.35397	2.9782e-06	1281, 1290, 4060, 1277, 1289, 1301, 1278	433	10	8480	13.709	0.00144339	5.55535e-05	0.00427028
GOTERM_BP_FAT	GO:0006026~aminoglycan catabolic process	12	2.32108	2.98009e-06	2517, 4060, 10082, 2331, 633, 3339, 5549, 3425, 1634, 1462, 1116, 411	474	39	9095	5.90393	0.0141204	0.000212231	0.00564326
GOTERM_BP_FAT	GO:0001706~endoderm formation	12	2.32108	2.98009e-06	3685, 4313, 1290, 1291, 1284, 3679, 3678, 2335, 1289, 1301, 3693, 4323	474	39	9095	5.90393	0.0141204	0.000212231	0.00564326
GOTERM_MF_FAT	GO:0048407~platelet-derived growth factor binding	7	1.35397	3.60009e-06	1281, 1291, 5156, 1277, 1289, 1278, 5159	442	10	8380	13.2715	0.00303746	0.000276514	0.00556572
GOTERM_BP_FAT	GO:2000146~negative regulation of cell motility	24	4.64217	3.75633e-06	4681, 1281, 90627, 25932, 23213, 5176, 4035, 127435, 3611, 6423, 26585, 5054, 1809, 6387, 89927, 11188, 7168, 7070, 6366, 7075, 7076, 1634, 104, 7057	474	153	9095	3.00985	0.0177655	0.000263572	0.00711315
GOTERM_MF_FAT	GO:0001968~fibronectin binding	9	1.74081	3.9717e-06	3685, 1513, 131578, 1490, 10272, 151887, 6423, 7057, 284297	442	20	8380	8.53167	0.00335047	0.000279636	0.00614023
GOTERM_CC_FAT	GO:0031226~intrinsic component of plasma membrane	59	11.412	4.20946e-06	2702, 10580, 8742, 7791, 6515, 23208, 114897, 3679, 3678, 4920, 2995, 22801, 5329, 29990, 5159, 2619, 4360, 2615, 10867, 4035, 8831, 3693, 2260, 7132, 23166, 1909, 3685, 929, 7070, 10100, 7075, 90139, 5787, 6443, 10267, 23531, 56172, 51063, 9902, 3071, 728, 558, 10082, 23584, 4323, 91653, 3672, 5156, 92, 90, 8082, 116535, 22821, 7052, 2687, 358, 9332, 7106, 51310	433	624	8480	1.85172	0.00203951	7.56118e-05	0.00603567
GOTERM_BP_FAT	GO:0034330~cell junction organization	27	5.22244	4.33801e-06	91663, 2702, 2318, 8861, 2316, 10580, 10979, 2335, 1009, 7145, 11228, 7122, 3678, 60, 87, 4323, 7043, 1307, 51564, 57493, 5170, 3611, 26585, 7070, 55679, 1613, 7057	474	188	9095	2.75569	0.0204882	0.00029997	0.0082146
GOTERM_BP_FAT	GO:0060284~regulation of cell development	51	9.8646	4.63418e-06	91663, 2335, 25960, 6423, 7122, 23373, 4659, 2200, 6925, 80279, 1281, 5176, 4035, 3611, 8831, 23162, 7132, 2260, 3956, 7070, 6938, 6695, 2331, 1277, 3400, 7077, 6935, 4681, 1435, 23531, 3213, 2316, 1809, 1808, 7041, 89927, 10631, 7424, 4131, 23098, 6586, 411, 7043, 11214, 90, 26585, 85458, 7431, 6387, 152007, 5396	474	498	9095	1.96501	0.0218716	0.00031587	0.00877542
GOTERM_BP_FAT	GO:0010646~regulation of cell communication	138	26.6925	4.84439e-06	91663, 1191, 2335, 8742, 25960, 6423, 440503, 90993, 114897, 51776, 3678, 29995, 8877, 112464, 4920, 5740, 4826, 1827, 5159, 2200, 51564, 90627, 1281, 8406, 4194, 5175, 4035, 8490, 5170, 3487, 3716, 55959, 3685, 929, 2, 23263, 7070, 3491, 6366, 25970, 1277, 10725, 7077, 1490, 7076, 1613, 2621, 1435, 56034, 55160, 2316, 10272, 22856, 10521, 5350, 7041, 728, 7424, 51306, 57158, 23098, 6586, 7043, 9…	474	1869	9095	1.41675	0.0228523	0.000325545	0.00917346
GOTERM_MF_FAT	GO:0044877~macromolecular complex binding	81	15.6673	5.04996e-06	5066, 83700, 57343, 2335, 10580, 127435, 6423, 1311, 7456, 90993, 7169, 7168, 131578, 114897, 57585, 3678, 1289, 22801, 87, 2191, 2200, 6925, 51564, 1281, 91624, 5118, 4035, 8404, 5170, 3611, 23166, 7412, 1513, 3491, 11188, 7070, 3913, 1490, 7077, 7171, 84939, 2212, 6935, 860, 5252, 57658, 81035, 2033, 2318, 22795, 8861, 2316, 10272, 54829, 6678, 9902, 3071, 60, 7045, 1508, 64175, 4323, 10516, 13…	442	934	8380	1.64422	0.00425813	0.000328194	0.00780714
GOTERM_MF_FAT	GO:0046872~metal ion binding	163	31.528	5.15056e-06	687, 90338, 64094, 1290, 57343, 3339, 9923, 1009, 1311, 79901, 11016, 3679, 51776, 3678, 29995, 8877, 4920, 1289, 5740, 22801, 2200, 51564, 4313, 1281, 4194, 10536, 8404, 4035, 5742, 3716, 55959, 165, 100129842, 92999, 3685, 54925, 8728, 23479, 6695, 1277, 7077, 4026, 7171, 2162, 7076, 1278, 9645, 5930, 4320, 2621, 5252, 81035, 283209, 10873, 22795, 7799, 22918, 22856, 8038, 10520, 6678, 1912, 70…	442	2285	8380	1.35246	0.00434278	0.000310825	0.00796266
GOTERM_BP_FAT	GO:0051241~negative regulation of multicellular organismal process	55	10.6383	5.91719e-06	1290, 2702, 2335, 6423, 149041, 23208, 114897, 4212, 1289, 5329, 11326, 2200, 6925, 284297, 51564, 90627, 1281, 2615, 1284, 4035, 23213, 5176, 8831, 2260, 23166, 3956, 7070, 6695, 7075, 3400, 7076, 2621, 8861, 10365, 10272, 22856, 54829, 1809, 5350, 6678, 3071, 89927, 558, 7043, 5156, 26585, 5054, 85458, 10743, 7431, 5997, 55679, 1634, 710, 7057	474	559	9095	1.88788	0.027842	0.000392103	0.0112048
GOTERM_BP_FAT	GO:0023051~regulation of signaling	139	26.8859	6.27465e-06	91663, 1191, 2335, 8742, 25960, 6423, 440503, 90993, 114897, 51776, 3678, 29995, 8877, 112464, 4920, 5740, 4826, 1827, 5159, 2200, 51564, 90627, 1281, 8406, 4194, 5175, 4035, 8490, 5170, 3487, 3716, 55959, 3685, 929, 2, 23263, 7070, 3491, 6366, 25970, 1277, 10725, 7077, 1490, 7076, 1613, 2621, 1435, 56034, 55160, 2316, 10272, 22856, 10521, 5350, 7041, 728, 7424, 51306, 57158, 23098, 6586, 7043, 9…	474	1895	9095	1.40744	0.0294989	0.00041009	0.0118817
GOTERM_BP_FAT	GO:0048705~skeletal system morphogenesis	20	3.86847	6.50335e-06	860, 4313, 51715, 5156, 3213, 1301, 1300, 22856, 6423, 26585, 1311, 2260, 4256, 5396, 1277, 1490, 4920, 6935, 4323, 7043	474	115	9095	3.337	0.0305575	0.000419292	0.0123147
GOTERM_MF_FAT	GO:0043169~cation binding	163	31.528	6.9651e-06	687, 90338, 64094, 1290, 57343, 3339, 9923, 1009, 1311, 79901, 11016, 3679, 51776, 3678, 29995, 8877, 4920, 1289, 5740, 22801, 2200, 51564, 4313, 1281, 4194, 10536, 8404, 4035, 5742, 3716, 55959, 165, 100129842, 92999, 3685, 54925, 8728, 23479, 6695, 1277, 7077, 4026, 7171, 2162, 7076, 1278, 9645, 5930, 4320, 2621, 5252, 81035, 283209, 10873, 22795, 7799, 22918, 22856, 8038, 10520, 6678, 1912, 70…	442	2296	8380	1.34598	0.00586825	0.000392292	0.0107678
GOTERM_BP_FAT	GO:0090092~regulation of transmembrane receptor protein serine/threonine kinase signaling pathway	21	4.0619	7.90243e-06	4681, 56937, 79176, 92, 23213, 90, 5170, 10272, 3611, 6423, 26585, 94031, 54829, 7041, 3491, 5654, 135228, 7057, 6935, 2200, 7043	474	127	9095	3.17278	0.0370083	0.000502681	0.0149638
GOTERM_BP_FAT	GO:0071560~cellular response to transforming growth factor beta stimulus	23	4.44874	8.21825e-06	56937, 1281, 1284, 90, 10979, 5170, 7791, 94031, 3693, 7122, 54829, 7041, 10631, 5654, 2331, 1277, 4053, 135228, 1278, 7057, 6935, 2200, 7043	474	149	9095	2.96187	0.0384586	0.000515889	0.0155618
GOTERM_CC_FAT	GO:0030018~Z disc	14	2.70793	9.0674e-06	23022, 91624, 2318, 55742, 114907, 2316, 10398, 27295, 1674, 2275, 4659, 87, 57158, 171024	433	61	8480	4.49476	0.00438805	0.000157049	0.0130007
GOTERM_BP_FAT	GO:0051271~negative regulation of cellular component movement	25	4.83559	9.60991e-06	4681, 1281, 90627, 25932, 23213, 5176, 4035, 127435, 3611, 6423, 26585, 5054, 1809, 6387, 89927, 11188, 7168, 7070, 6366, 7075, 7076, 1634, 104, 87, 7057	474	173	9095	2.7728	0.0448231	0.00059539	0.0181968
GOTERM_BP_FAT	GO:0006027~glycosaminoglycan catabolic process	11	2.12766	9.83773e-06	2517, 4060, 10082, 2331, 633, 3339, 5549, 3425, 1634, 1462, 411	474	36	9095	5.86293	0.045861	0.000601689	0.0186281
GOTERM_BP_FAT	GO:0071559~response to transforming growth factor beta	23	4.44874	1.02296e-05	56937, 1281, 1284, 90, 10979, 5170, 7791, 94031, 3693, 7122, 54829, 7041, 10631, 5654, 2331, 1277, 4053, 135228, 1278, 7057, 6935, 2200, 7043	474	151	9095	2.92264	0.0476434	0.000617729	0.01937
GOTERM_BP_FAT	GO:0034329~cell junction assembly	23	4.44874	1.13937e-05	1307, 51564, 2702, 2318, 8861, 57493, 2316, 2335, 10979, 5170, 10580, 7145, 3611, 26585, 7122, 7070, 55679, 3678, 60, 1613, 87, 7057, 4323	474	152	9095	2.90341	0.0529192	0.000679405	0.0215741
KEGG_PATHWAY	hsa04810:Regulation of actin cytoskeleton	20	3.86847	1.14513e-05	3672, 5156, 56034, 2335, 2252, 3693, 10398, 2260, 3685, 929, 3071, 4638, 3679, 3678, 4659, 22801, 54776, 60, 87, 5159	177	143	3999	3.15989	0.00218482	0.00031241	0.0142438
GOTERM_BP_FAT	GO:0045597~positive regulation of cell differentiation	49	9.47776	1.31191e-05	91663, 5919, 2335, 6423, 7122, 115908, 23373, 6925, 5320, 5176, 3611, 23162, 2260, 3956, 6938, 3491, 1490, 3400, 7077, 1277, 338773, 6935, 4681, 2621, 860, 1435, 23531, 22890, 2316, 1809, 9260, 3071, 7041, 558, 7424, 4054, 4131, 4323, 7043, 411, 91653, 56975, 92, 90, 26585, 9839, 6387, 152007, 6424	474	489	9095	1.9227	0.0606854	0.000772601	0.0248408
GOTERM_BP_FAT	GO:0048584~positive regulation of response to stimulus	97	18.7621	1.32094e-05	1191, 8742, 6423, 114897, 51776, 3678, 29995, 112464, 4920, 8877, 5740, 5159, 11326, 1281, 4313, 8406, 5175, 5170, 3487, 55959, 2, 929, 1513, 3491, 7070, 23263, 6366, 25970, 7077, 1490, 1277, 1613, 2212, 2621, 1435, 81035, 2316, 56034, 22856, 10521, 7041, 728, 4638, 7424, 720, 1508, 57158, 23098, 7043, 5156, 392, 92, 90, 10417, 1116, 5054, 340061, 85458, 6387, 716, 152007, 7052, 55679, 715, 1634,…	474	1221	9095	1.52434	0.0610901	0.000768434	0.0250118
GOTERM_BP_FAT	GO:0030509~BMP signaling pathway	15	2.90135	1.36464e-05	4681, 860, 79176, 92, 23213, 90, 10272, 3611, 26585, 94031, 6423, 3491, 5654, 4920, 2200	474	71	9095	4.05375	0.063046	0.000784284	0.0258391
GOTERM_BP_FAT	GO:0030036~actin cytoskeleton organization	42	8.12379	1.5938e-05	91663, 83700, 2006, 55160, 2316, 55742, 10580, 7791, 2252, 1809, 7456, 9260, 3071, 7169, 7168, 2275, 10487, 112464, 25802, 87, 7043, 5159, 171024, 23022, 1264, 5156, 11214, 5170, 3693, 27295, 6387, 152273, 11188, 6366, 358, 1490, 4629, 7171, 70, 84168, 9645, 1613	474	395	9095	2.04022	0.0732362	0.000905026	0.0301775
GOTERM_MF_FAT	GO:0043167~ion binding	167	32.3017	1.62191e-05	687, 90338, 64094, 1290, 57343, 3339, 9923, 1009, 1311, 79901, 11016, 3679, 51776, 3678, 29995, 8877, 4920, 1289, 5740, 22801, 2200, 51564, 4313, 1281, 4194, 10536, 8404, 4035, 5742, 3716, 55959, 165, 100129842, 92999, 3685, 54925, 8728, 23479, 6695, 1277, 7077, 4026, 7171, 2162, 7076, 1278, 9645, 5930, 4320, 2621, 5252, 81035, 283209, 10873, 22795, 7799, 22918, 22856, 8038, 10520, 6678, 1912, 70…	442	2398	8380	1.32035	0.0136118	0.000856211	0.0250724
GOTERM_MF_FAT	GO:0005198~structural molecule activity	48	9.28433	1.92528e-05	2006, 1290, 1296, 85378, 145864, 1311, 10398, 7122, 126393, 8076, 4256, 7169, 7168, 4926, 2199, 1289, 80781, 1462, 60, 4130, 4131, 2200, 83742, 7837, 1306, 1281, 91624, 1284, 11214, 633, 11117, 5549, 1301, 23162, 1116, 7431, 27295, 23479, 1674, 3913, 55700, 4060, 1277, 4629, 7171, 3910, 23336, 1278	442	477	8380	1.90785	0.0161372	0.000956529	0.0297614
GOTERM_BP_FAT	GO:0050920~regulation of chemotaxis	18	3.48162	2.01487e-05	4681, 2621, 83700, 63940, 5919, 1435, 5156, 25960, 26585, 5054, 2260, 3071, 6387, 728, 6366, 7424, 7057, 5159	474	103	9095	3.3532	0.0916726	0.00113054	0.0381488
GOTERM_BP_FAT	GO:0006954~inflammatory response	36	6.96325	2.11155e-05	83700, 63940, 1435, 5919, 241, 4775, 2335, 8639, 9473, 728, 558, 8877, 720, 5740, 8460, 5320, 5742, 5176, 90, 3487, 1116, 5054, 7132, 23166, 6387, 7412, 2, 929, 2687, 7052, 6366, 10100, 9332, 710, 7057, 2532	474	319	9095	2.16539	0.095854	0.00117099	0.0399791
GOTERM_BP_FAT	GO:0030510~regulation of BMP signaling pathway	12	2.32108	2.121e-05	4681, 79176, 3491, 5654, 92, 23213, 10272, 3611, 26585, 6423, 94031, 2200	474	47	9095	4.899	0.0962615	0.00116272	0.0401579
GOTERM_CC_FAT	GO:0005912~adherens junction	57	11.0251	2.12911e-05	800, 55082, 55742, 3339, 10580, 7791, 83604, 10487, 3678, 4659, 22801, 87, 2191, 5329, 171024, 5159, 23022, 91624, 57496, 10867, 4035, 5170, 3611, 3716, 309, 3693, 3685, 7070, 4026, 7171, 70, 2318, 2316, 10979, 7145, 9902, 9260, 7041, 2273, 7089, 2275, 60, 4323, 3672, 1264, 1465, 392, 3371, 7431, 85458, 57608, 7052, 1674, 55679, 91179, 23336, 7106	433	628	8480	1.77756	0.0102732	0.000356015	0.0305244
GOTERM_MF_FAT	GO:0019955~cytokine binding	13	2.51451	2.15386e-05	4681, 7837, 90, 26585, 7132, 3685, 2, 8828, 4054, 135228, 7057, 2532, 7043	442	55	8380	4.48128	0.0180357	0.00101062	0.0332943
KEGG_PATHWAY	hsa05412:Arrhythmogenic right ventricular cardiomyopathy (ARVC)	10	1.93424	2.16183e-05	3685, 6443, 3672, 1674, 3679, 3678, 22801, 60, 3693, 87	177	37	3999	6.10628	0.00412062	0.000516009	0.0268886
GOTERM_CC_FAT	GO:0070161~anchoring junction	58	11.2186	2.18863e-05	83700, 800, 55082, 55742, 3339, 10580, 7791, 83604, 10487, 3678, 4659, 22801, 87, 2191, 5329, 171024, 5159, 23022, 91624, 57496, 10867, 4035, 5170, 3611, 3716, 309, 3693, 3685, 7070, 4026, 7171, 70, 2318, 2316, 10979, 7145, 9902, 9260, 7041, 2273, 7089, 2275, 60, 4323, 3672, 1264, 1465, 392, 3371, 7431, 85458, 57608, 7052, 1674, 55679, 91179, 23336, 7106	433	643	8480	1.76655	0.0105588	0.00035377	0.0313777
GOTERM_BP_FAT	GO:0040013~negative regulation of locomotion	24	4.64217	2.45023e-05	4681, 1281, 90627, 25932, 23213, 5176, 4035, 127435, 3611, 6423, 26585, 5054, 1809, 6387, 89927, 11188, 7168, 7070, 6366, 7075, 7076, 1634, 104, 7057	474	171	9095	2.69302	0.110349	0.00132783	0.0463899
GOTERM_BP_FAT	GO:0051094~positive regulation of developmental process	57	11.0251	2.47667e-05	91663, 57343, 2335, 8742, 2252, 6423, 7122, 23373, 3678, 8877, 5740, 6925, 5159, 51564, 57496, 5176, 3611, 3716, 23162, 2260, 3956, 6938, 3491, 1277, 7077, 338773, 6935, 2621, 4681, 860, 1435, 23531, 22890, 2316, 1809, 7041, 3071, 728, 7424, 558, 4131, 4323, 411, 7043, 91653, 56975, 92, 90, 26585, 1116, 5054, 6387, 152007, 358, 1634, 6424, 7057	474	617	9095	1.77261	0.111471	0.00132707	0.0468904
GOTERM_BP_FAT	GO:0010811~positive regulation of cell-substrate adhesion	15	2.90135	2.62464e-05	91663, 1307, 64094, 1435, 2316, 2335, 11117, 3611, 3491, 4811, 6366, 7424, 2199, 3678, 151887	474	75	9095	3.83755	0.117723	0.00139069	0.0496913
GOTERM_MF_FAT	GO:0004872~receptor activity	45	8.70406	2.66296e-05	10267, 81035, 4684, 23531, 25960, 22918, 6423, 9902, 728, 558, 10082, 3678, 4920, 8877, 22801, 5329, 57158, 284297, 5159, 4360, 5156, 92, 4035, 90, 116535, 309, 3693, 22821, 2260, 7132, 23166, 1909, 929, 3685, 118429, 8828, 7075, 358, 91179, 9332, 84168, 6424, 5787, 51310, 2532	442	441	8380	1.93462	0.0222511	0.00118363	0.0411625
GOTERM_MF_FAT	GO:0060089~molecular transducer activity	45	8.70406	2.66296e-05	10267, 81035, 4684, 23531, 25960, 22918, 6423, 9902, 728, 558, 10082, 3678, 4920, 8877, 22801, 5329, 57158, 284297, 5159, 4360, 5156, 92, 4035, 90, 116535, 309, 3693, 22821, 2260, 7132, 23166, 1909, 929, 3685, 118429, 8828, 7075, 358, 91179, 9332, 84168, 6424, 5787, 51310, 2532	442	441	8380	1.93462	0.0222511	0.00118363	0.0411625
GOTERM_BP_FAT	GO:0006935~chemotaxis	33	6.38298	2.66523e-05	2621, 4681, 63940, 83700, 1435, 5919, 4684, 55742, 2252, 1808, 3071, 728, 7424, 5329, 5159, 6586, 91653, 3672, 5156, 26585, 10417, 23162, 5054, 2260, 6387, 7412, 3685, 3491, 8828, 3913, 6366, 2331, 7057	474	283	9095	2.23744	0.119431	0.00139668	0.0504596
GOTERM_CC_FAT	GO:0015629~actin cytoskeleton	35	6.76983	2.79972e-05	91663, 59, 800, 2316, 55742, 10580, 10979, 7791, 10398, 1809, 7456, 7122, 9260, 7169, 7168, 4638, 2275, 10487, 4659, 80022, 87, 25802, 171024, 23022, 25932, 11214, 3611, 27129, 27295, 7412, 4629, 7171, 70, 72, 1613	433	317	8480	2.1623	0.0134871	0.000437932	0.040137
GOTERM_BP_FAT	GO:0042330~taxis	33	6.38298	2.8204e-05	2621, 4681, 63940, 83700, 1435, 5919, 4684, 55742, 2252, 1808, 3071, 728, 7424, 5329, 5159, 6586, 91653, 3672, 5156, 26585, 10417, 23162, 5054, 2260, 6387, 7412, 3685, 3491, 8828, 3913, 6366, 2331, 7057	474	284	9095	2.22956	0.125927	0.00146188	0.0533966
GOTERM_BP_FAT	GO:0071772~response to BMP	15	2.90135	3.06704e-05	4681, 860, 79176, 92, 23213, 90, 10272, 3611, 26585, 94031, 6423, 3491, 5654, 4920, 2200	474	76	9095	3.78706	0.136154	0.00157254	0.0580647
GOTERM_BP_FAT	GO:0071773~cellular response to BMP stimulus	15	2.90135	3.06704e-05	4681, 860, 79176, 92, 23213, 90, 10272, 3611, 26585, 94031, 6423, 3491, 5654, 4920, 2200	474	76	9095	3.78706	0.136154	0.00157254	0.0580647
GOTERM_CC_FAT	GO:0043202~lysosomal lumen	14	2.70793	3.12608e-05	3339, 633, 5549, 2517, 1513, 4060, 2331, 10082, 1634, 3425, 1462, 1508, 411, 5159	433	68	8480	4.03206	0.0150474	0.000473692	0.0448147
GOTERM_BP_FAT	GO:0030278~regulation of ossification	18	3.48162	3.79531e-05	51564, 56975, 860, 1435, 92, 56172, 90, 3611, 22856, 6423, 26585, 9260, 4256, 115908, 3491, 3400, 338773, 7043	474	108	9095	3.19796	0.165661	0.00192491	0.0718476
GOTERM_BP_FAT	GO:0043206~extracellular fibril organization	6	1.16054	3.94358e-05	1281, 4239, 4053, 1289, 3611, 8076	474	9	9095	12.7918	0.171544	0.001979	0.0746534
GOTERM_BP_FAT	GO:0007492~endoderm development	12	2.32108	3.94796e-05	3685, 4313, 1290, 1291, 1284, 3679, 3678, 2335, 1289, 1301, 3693, 4323	474	50	9095	4.60506	0.171717	0.00196058	0.0747363
KEGG_PATHWAY	hsa05146:Amoebiasis	13	2.51451	4.13135e-05	929, 1281, 1290, 3913, 1284, 1277, 2335, 1289, 3910, 1301, 1278, 87, 7043	177	70	3999	4.19588	0.00785998	0.000876397	0.0513794
GOTERM_BP_FAT	GO:0045766~positive regulation of angiogenesis	15	2.90135	4.15196e-05	51564, 57343, 8742, 6423, 26585, 3716, 1116, 5054, 728, 7424, 358, 3678, 8877, 5740, 7057	474	78	9095	3.68995	0.179741	0.00204055	0.0785967
GOTERM_BP_FAT	GO:0060326~cell chemotaxis	20	3.86847	4.36181e-05	4681, 2621, 83700, 63940, 5919, 1435, 3672, 5156, 55742, 26585, 5054, 2260, 3071, 6387, 7412, 728, 6366, 7424, 7057, 5159	474	131	9095	2.92943	0.187915	0.00212173	0.0825676
GOTERM_BP_FAT	GO:0007010~cytoskeleton organization	67	12.9594	4.89112e-05	91663, 5066, 83700, 2006, 55742, 10580, 7791, 2252, 85378, 7456, 7169, 7168, 4926, 51776, 10487, 9204, 4659, 112464, 87, 171024, 5159, 23022, 84809, 4035, 5170, 3611, 3693, 11188, 7070, 6366, 55700, 1490, 7171, 70, 1613, 9645, 26140, 55160, 2316, 1783, 1809, 9260, 1808, 3071, 89927, 2275, 4130, 60, 4131, 25802, 7043, 755, 1264, 5156, 11214, 23345, 7431, 27295, 85458, 6387, 152273, 5997, 1674, 358…	474	784	9095	1.63977	0.208171	0.0023549	0.0925829
GOTERM_BP_FAT	GO:0007179~transforming growth factor beta receptor signaling pathway	19	3.67505	4.90705e-05	56937, 1281, 90, 10979, 5170, 7791, 94031, 3693, 54829, 7122, 7041, 5654, 2331, 4053, 135228, 1278, 7057, 2200, 7043	474	121	9095	3.01295	0.208773	0.00233896	0.0928843
GOTERM_BP_FAT	GO:0016525~negative regulation of angiogenesis	11	2.12766	5.3422e-05	23166, 90627, 1284, 7075, 23213, 5176, 1634, 7057, 5054, 6678, 6925	474	43	9095	4.9085	0.225034	0.00252094	0.101117
GOTERM_BP_FAT	GO:0001704~formation of primary germ layer	15	2.90135	5.55906e-05	3685, 4313, 1290, 1291, 1284, 3679, 3678, 90, 2335, 1289, 1301, 6423, 3693, 4323, 2260	474	80	9095	3.59771	0.233013	0.00259746	0.10522
GOTERM_BP_FAT	GO:0007044~cell-substrate junction assembly	14	2.70793	6.27308e-05	1307, 8861, 2335, 10580, 5170, 10979, 7145, 26585, 7070, 3678, 1613, 87, 7057, 4323	474	71	9095	3.7835	0.258708	0.0029022	0.118727
GOTERM_BP_FAT	GO:0090101~negative regulation of transmembrane receptor protein serine/threonine kinase signaling pathway	14	2.70793	6.27308e-05	4681, 7041, 56937, 5654, 90, 5170, 10272, 135228, 26585, 6423, 94031, 54829, 7043, 2200	474	71	9095	3.7835	0.258708	0.0029022	0.118727
KEGG_PATHWAY	hsa04610:Complement and coagulation cascades	9	1.74081	6.47697e-05	716, 2, 728, 715, 2162, 720, 710, 5329, 5054	177	33	3999	6.16179	0.0122952	0.00123638	0.0805399
GOTERM_MF_FAT	GO:0008307~structural constituent of muscle	8	1.54739	6.50478e-05	27295, 7169, 91624, 7168, 4629, 7171, 23336, 10398	442	21	8380	7.22258	0.0534838	0.00274459	0.100519
GOTERM_BP_FAT	GO:2000181~negative regulation of blood vessel morphogenesis	11	2.12766	6.59689e-05	23166, 90627, 1284, 7075, 23213, 5176, 1634, 7057, 5054, 6678, 6925	474	44	9095	4.79694	0.270075	0.00302248	0.124852
GOTERM_BP_FAT	GO:0042127~regulation of cell proliferation	77	14.8936	6.64338e-05	687, 57343, 10290, 2335, 8742, 127435, 2252, 6423, 149041, 6320, 115908, 7168, 4920, 8877, 80781, 2191, 11326, 5159, 4313, 2615, 8406, 4194, 10536, 5176, 5742, 23213, 3611, 3716, 55959, 7132, 2260, 3685, 7412, 3490, 10628, 3491, 8828, 1490, 3400, 7077, 7076, 338773, 6935, 2621, 860, 1435, 56034, 6678, 3071, 7041, 728, 1805, 7424, 5654, 4054, 104, 64175, 6586, 7043, 9891, 10181, 3672, 1264, 5156, …	474	948	9095	1.5585	0.271693	0.0030148	0.125731
GOTERM_BP_FAT	GO:0045785~positive regulation of cell adhesion	28	5.41586	6.85094e-05	91663, 1435, 64094, 8861, 22890, 2316, 2335, 10272, 6423, 3071, 7168, 2199, 7424, 3678, 151887, 1307, 11117, 5170, 3611, 6387, 7412, 3685, 3956, 7070, 7052, 3491, 4811, 6366	474	232	9095	2.31576	0.278872	0.00307957	0.129657
GOTERM_BP_FAT	GO:0045669~positive regulation of osteoblast differentiation	11	2.12766	8.09353e-05	860, 56975, 115908, 3491, 92, 90, 3400, 3611, 6423, 338773, 9260	474	45	9095	4.69034	0.320392	0.0036032	0.153157
GOTERM_CC_FAT	GO:0042641~actomyosin	12	2.32108	8.25717e-05	7168, 4638, 2275, 10979, 7171, 70, 10580, 7791, 3611, 10398, 87, 9260	433	55	8480	4.27294	0.0392576	0.00121287	0.118332
GOTERM_CC_FAT	GO:0001725~stress fiber	11	2.12766	8.26744e-05	7168, 4638, 2275, 10979, 7171, 10580, 7791, 3611, 10398, 87, 9260	433	46	8480	4.6832	0.0393054	0.00117868	0.118479
GOTERM_CC_FAT	GO:0097517~contractile actin filament bundle	11	2.12766	8.26744e-05	7168, 4638, 2275, 10979, 7171, 10580, 7791, 3611, 10398, 87, 9260	433	46	8480	4.6832	0.0393054	0.00117868	0.118479
GOTERM_BP_FAT	GO:0001649~osteoblast differentiation	20	3.86847	8.99542e-05	51564, 56975, 860, 1291, 92, 90, 3371, 3611, 6423, 9902, 9260, 90993, 115908, 3491, 1277, 3400, 7171, 22801, 1462, 338773	474	138	9095	2.78084	0.349023	0.00396693	0.17021
GOTERM_BP_FAT	GO:0006937~regulation of muscle contraction	13	2.51451	9.41811e-05	1264, 1760, 2702, 2316, 309, 10398, 5350, 126393, 5997, 7168, 1490, 8877, 1613	474	64	9095	3.89751	0.362023	0.00411494	0.178201
GOTERM_BP_FAT	GO:0007369~gastrulation	18	3.48162	9.58151e-05	91663, 1290, 4313, 1291, 1284, 92, 8861, 90, 2335, 1301, 6423, 3693, 2260, 3685, 3679, 3678, 1289, 4323	474	116	9095	2.97741	0.366979	0.0041482	0.18129
GOTERM_BP_FAT	GO:0045778~positive regulation of ossification	12	2.32108	9.99007e-05	860, 56975, 115908, 3491, 92, 90, 3400, 3611, 6423, 338773, 7043, 9260	474	55	9095	4.18642	0.379202	0.00428584	0.189013
GOTERM_CC_FAT	GO:0005884~actin filament	13	2.51451	0.000104942	23022, 11214, 2316, 10979, 7456, 1809, 7169, 7168, 7171, 70, 1613, 25802, 87	433	66	8480	3.85751	0.049626	0.00145322	0.150369
GOTERM_BP_FAT	GO:0009719~response to endogenous stimulus	76	14.7002	0.00010551	687, 5066, 5919, 1290, 1291, 10580, 7791, 2252, 6423, 7122, 4920, 2200, 5159, 4313, 1281, 1284, 23213, 5176, 5170, 3611, 55959, 3693, 2260, 7412, 3490, 10628, 3491, 6366, 2331, 7077, 1490, 1277, 7076, 1278, 4837, 6935, 4681, 860, 57658, 2033, 56034, 10365, 114907, 10272, 10979, 10521, 11031, 54829, 5350, 6678, 1808, 7041, 728, 10631, 5654, 4053, 1508, 4015, 4323, 6586, 7043, 1307, 79176, 56937, 9…	474	945	9095	1.54314	0.395602	0.00448565	0.199617
GOTERM_BP_FAT	GO:0070167~regulation of biomineral tissue development	10	1.93424	0.000108697	2621, 4256, 56975, 92, 56172, 90, 26585, 338773, 54829, 7043	474	38	9095	5.04941	0.404724	0.00458001	0.20564
GOTERM_BP_FAT	GO:0071310~cellular response to organic substance	103	19.9226	0.000111487	687, 1290, 1291, 8742, 25960, 6423, 90993, 3678, 4920, 8877, 5740, 5159, 2200, 4313, 1281, 1284, 5176, 5170, 3716, 55959, 3693, 7412, 929, 3490, 3491, 6366, 2331, 1490, 1277, 1278, 1613, 2621, 1435, 81035, 56034, 10272, 10521, 11031, 6678, 7041, 7424, 1508, 6586, 7043, 1307, 56975, 5156, 92, 90, 192670, 10417, 1116, 5054, 340061, 6387, 7052, 1634, 7057, 5919, 10580, 2252, 127435, 7791, 149041, 71…	474	1388	9095	1.42388	0.412599	0.00465621	0.210913
GOTERM_BP_FAT	GO:0090257~regulation of muscle system process	16	3.09478	0.000117421	1264, 1760, 2702, 11214, 114907, 2316, 10398, 309, 5350, 126393, 5997, 7168, 29995, 1490, 8877, 1613	474	96	9095	3.19796	0.429	0.00486089	0.222127
GOTERM_BP_FAT	GO:1901343~negative regulation of vasculature development	11	2.12766	0.000119626	23166, 90627, 1284, 7075, 23213, 5176, 1634, 7057, 5054, 6678, 6925	474	47	9095	4.49075	0.434976	0.00490936	0.226293
GOTERM_BP_FAT	GO:0002690~positive regulation of leukocyte chemotaxis	11	2.12766	0.000119626	2621, 6387, 3071, 63940, 1435, 5919, 728, 6366, 7424, 7057, 5054	474	47	9095	4.49075	0.434976	0.00490936	0.226293
GOTERM_BP_FAT	GO:0010033~response to organic substance	126	24.3714	0.000129737	1292, 687, 1290, 1291, 1191, 8742, 25960, 6423, 90993, 3678, 4212, 8877, 4920, 5740, 25822, 5159, 284297, 2200, 4313, 1281, 1284, 5176, 5170, 3716, 55959, 3693, 27129, 7412, 929, 10628, 3490, 3491, 6366, 7075, 2331, 1277, 7077, 1490, 7076, 1278, 4837, 1613, 2621, 1435, 81035, 56034, 10272, 10521, 11031, 5350, 6678, 7041, 728, 7424, 1508, 4015, 23098, 6586, 7043, 4016, 411, 1307, 56975, 5156, 92, …	474	1784	9095	1.35519	0.461596	0.00527788	0.245399
GOTERM_CC_FAT	GO:0005887~integral component of plasma membrane	52	10.058	0.000131504	10267, 6443, 2702, 23531, 56172, 8742, 10580, 7791, 6515, 9902, 51063, 23208, 3071, 728, 114897, 10082, 558, 3679, 3678, 4920, 2995, 22801, 23584, 4323, 5329, 29990, 4360, 91653, 3672, 2615, 5156, 10867, 92, 4035, 90, 8082, 116535, 3693, 7132, 2260, 23166, 1909, 3685, 7070, 10100, 7075, 358, 9332, 7106, 90139, 5787, 51310	433	593	8480	1.71734	0.0617921	0.0017702	0.188395
GOTERM_MF_FAT	GO:0008236~serine-type peptidase activity	16	3.09478	0.000132713	4313, 119587, 64499, 94031, 165, 1513, 716, 5654, 715, 7177, 720, 1508, 2191, 4323, 56265, 4320	442	96	8380	3.15988	0.10609	0.00532623	0.204982
GOTERM_BP_FAT	GO:0010517~regulation of phospholipase activity	9	1.74081	0.000137639	1909, 5997, 728, 3491, 5156, 4035, 5170, 5159, 2260	474	31	9095	5.57064	0.481524	0.00555115	0.260327
GOTERM_BP_FAT	GO:0007507~heart development	34	6.5764	0.000139207	5066, 6443, 2702, 2033, 55742, 6423, 6678, 5350, 7122, 7168, 8642, 1289, 4015, 7043, 5159, 2200, 1281, 91624, 5156, 11214, 57493, 90, 1301, 3611, 26585, 2260, 27295, 1909, 8728, 3491, 8828, 4629, 70, 9645	474	322	9095	2.02604	0.485388	0.00556714	0.263288
GOTERM_BP_FAT	GO:1904018~positive regulation of vasculature development	15	2.90135	0.00014273	51564, 57343, 8742, 6423, 26585, 3716, 1116, 5054, 728, 7424, 358, 3678, 8877, 5740, 7057	474	87	9095	3.30824	0.493968	0.00566021	0.269943
GOTERM_BP_FAT	GO:0060537~muscle tissue development	25	4.83559	0.00014501	1281, 2006, 6443, 91624, 57496, 2702, 5156, 9242, 2033, 57493, 11214, 90, 1301, 10521, 26585, 5350, 2260, 7168, 4638, 4629, 70, 1634, 1827, 57158, 5159	474	204	9095	2.35144	0.499446	0.00570301	0.27425
GOTERM_MF_FAT	GO:0017171~serine hydrolase activity	16	3.09478	0.000149579	4313, 119587, 64499, 94031, 165, 1513, 716, 5654, 715, 7177, 720, 1508, 2191, 4323, 56265, 4320	442	97	8380	3.1273	0.118741	0.00572915	0.231005
GOTERM_BP_FAT	GO:0070887~cellular response to chemical stimulus	118	22.824	0.000152632	687, 83700, 1290, 1291, 55742, 8742, 25960, 6423, 90993, 7168, 3678, 4920, 8877, 5740, 5159, 2200, 4313, 1281, 4194, 1284, 5176, 5742, 5170, 3716, 55959, 3693, 7412, 929, 3490, 3491, 6366, 2331, 1490, 1277, 1278, 1613, 2621, 1435, 81035, 56034, 10272, 10521, 11031, 6678, 7041, 728, 7424, 1508, 6586, 7043, 10516, 1307, 56975, 5156, 92, 90, 192670, 10417, 1116, 5054, 340061, 6387, 7052, 1634, 7057,…	474	1654	9095	1.3689	0.517327	0.00595283	0.288645
GOTERM_BP_FAT	GO:0003013~circulatory system process	26	5.02901	0.000171568	2621, 2006, 59, 1760, 2702, 2316, 5350, 7168, 10631, 7424, 1827, 3672, 57493, 5742, 11214, 27129, 1909, 6387, 5997, 11188, 1674, 1490, 70, 53826, 710, 1278	474	219	9095	2.278	0.559036	0.00663475	0.3244
GOTERM_CC_FAT	GO:0032432~actin filament bundle	11	2.12766	0.000173504	7168, 4638, 2275, 10979, 7171, 10580, 7791, 3611, 10398, 87, 9260	433	50	8480	4.30855	0.0807128	0.00227192	0.248495
GOTERM_BP_FAT	GO:0048598~embryonic morphogenesis	34	6.5764	0.000176557	91663, 860, 1290, 1291, 2702, 8861, 3213, 2335, 6423, 115908, 51776, 3679, 7424, 3678, 1289, 4920, 4323, 7043, 2200, 4313, 5156, 1284, 92, 23213, 90, 1301, 26585, 3693, 2260, 3685, 5396, 3491, 9645, 6935	474	326	9095	2.00118	0.569413	0.00677217	0.333819
GOTERM_CC_FAT	GO:0005775~vacuolar lumen	14	2.70793	0.000179772	3339, 633, 5549, 2517, 1513, 4060, 2331, 10082, 1634, 3425, 1462, 1508, 411, 5159	433	80	8480	3.42725	0.0835038	0.00229204	0.257462
GOTERM_CC_FAT	GO:0030141~secretory granule	22	4.25532	0.000179973	5066, 3671, 2621, 5919, 3672, 5320, 1191, 5175, 2335, 10272, 6678, 5054, 2, 7424, 1277, 2162, 7076, 710, 87, 7057, 4016, 7043	433	173	8480	2.49049	0.0835929	0.00223582	0.257748
GOTERM_CC_FAT	GO:0042383~sarcolemma	12	2.32108	0.000218921	1292, 1293, 7412, 6443, 1291, 1674, 2318, 358, 633, 8082, 23336, 7043	433	61	8480	3.85265	0.100745	0.00265118	0.313447
GOTERM_MF_FAT	GO:0005520~insulin-like growth factor binding	7	1.35397	0.00022162	3685, 3490, 3491, 5654, 1490, 3487, 94031	442	18	8380	7.37305	0.170797	0.00810998	0.342085
GOTERM_BP_FAT	GO:0050921~positive regulation of chemotaxis	13	2.51451	0.000229688	2621, 63940, 5919, 1435, 5054, 2260, 3071, 6387, 728, 6366, 7424, 7057, 5159	474	70	9095	3.56344	0.66586	0.00873122	0.434066
GOTERM_BP_FAT	GO:0031214~biomineral tissue development	13	2.51451	0.000229688	2621, 56975, 79176, 92, 56172, 90, 9923, 26585, 54829, 4256, 1277, 338773, 7043	474	70	9095	3.56344	0.66586	0.00873122	0.434066
GOTERM_CC_FAT	GO:0072562~blood microparticle	11	2.12766	0.000243878	716, 2, 1191, 715, 2335, 2162, 70, 720, 710, 72, 60	433	52	8480	4.14283	0.111566	0.00288109	0.349122
GOTERM_BP_FAT	GO:0060191~regulation of lipase activity	10	1.93424	0.000246963	1909, 440503, 5997, 728, 3491, 5156, 4035, 5170, 5159, 2260	474	42	9095	4.56852	0.692308	0.00931079	0.466642
GOTERM_BP_FAT	GO:0090130~tissue migration	22	4.25532	0.000262175	51564, 90627, 59, 5175, 5176, 5170, 8742, 2252, 25960, 26585, 6678, 9839, 2260, 152007, 8828, 7424, 70, 1634, 72, 7057, 2191, 411	474	174	9095	2.42604	0.713857	0.0098041	0.495317
GOTERM_MF_FAT	GO:0005102~receptor binding	62	11.9923	0.000271428	83700, 5919, 2335, 10580, 8742, 2252, 6423, 6320, 115908, 3678, 1289, 4920, 87, 2191, 5329, 29990, 2200, 5159, 7837, 1281, 4035, 5170, 3611, 3487, 3716, 2, 7412, 3491, 11188, 7070, 6366, 23452, 3913, 2331, 1490, 7077, 7076, 3910, 2621, 1435, 10267, 2033, 56034, 2316, 10521, 7041, 7424, 7045, 4323, 6586, 7043, 10516, 1307, 3672, 5156, 26585, 5054, 6387, 3425, 7106, 4240, 7057	442	744	8380	1.57994	0.20498	0.00951229	0.418815
GOTERM_BP_FAT	GO:0043277~apoptotic cell clearance	8	1.54739	0.000272735	2621, 3685, 7052, 558, 4035, 720, 4240, 7057	474	26	9095	5.90393	0.727923	0.0101178	0.515219
GOTERM_BP_FAT	GO:0006909~phagocytosis	20	3.86847	0.000273963	2621, 84286, 8406, 81035, 5175, 4035, 22918, 10417, 7456, 23208, 3685, 929, 3071, 7052, 558, 720, 4240, 2212, 60, 7057	474	150	9095	2.55837	0.729513	0.0100847	0.517533
GOTERM_BP_FAT	GO:0033627~cell adhesion mediated by integrin	9	1.74081	0.000276017	1307, 3685, 3071, 6366, 3678, 22801, 6423, 5054, 2200	474	34	9095	5.07911	0.732152	0.0100822	0.521404
GOTERM_CC_FAT	GO:0009897~external side of plasma membrane	16	3.09478	0.000287108	3672, 4684, 5175, 57493, 3685, 929, 7412, 6387, 161198, 2687, 7070, 118429, 3678, 84168, 4240, 7057	433	106	8480	2.95612	0.130004	0.00331039	0.410889
GOTERM_BP_FAT	GO:0000904~cell morphogenesis involved in differentiation	41	7.93037	0.000292749	91663, 4684, 2033, 2316, 55742, 10979, 2335, 1009, 6423, 1808, 7041, 10631, 558, 80781, 4131, 87, 23098, 7043, 6586, 91653, 23022, 25932, 5175, 57493, 90, 5549, 3611, 26585, 10417, 23162, 8831, 3685, 6387, 152007, 7070, 3913, 8828, 4060, 2331, 1277, 84168	474	435	9095	1.8085	0.752712	0.010609	0.552928
KEGG_PATHWAY	hsa05144:Malaria	8	1.54739	0.000304195	7412, 5175, 4035, 2995, 1311, 7057, 7043, 2532	177	31	3999	5.83051	0.0564539	0.00526881	0.377743
GOTERM_BP_FAT	GO:0048706~embryonic skeletal system development	12	2.32108	0.000305287	860, 5396, 5156, 92, 3213, 23213, 1277, 1301, 55959, 4323, 6935, 7043	474	62	9095	3.71376	0.767078	0.0109776	0.576544
GOTERM_BP_FAT	GO:0071495~cellular response to endogenous stimulus	61	11.7988	0.000309009	687, 5919, 1290, 1291, 10580, 7791, 2252, 6423, 7122, 4920, 2200, 5159, 4313, 1281, 1284, 23213, 5176, 5170, 3611, 55959, 3693, 2260, 3490, 3491, 2331, 1277, 1490, 1278, 6935, 4681, 860, 57658, 2033, 56034, 10365, 114907, 10272, 10979, 10521, 11031, 54829, 7041, 10631, 5654, 4053, 1508, 7043, 6586, 1307, 79176, 56937, 92, 90, 3371, 94031, 26585, 25959, 8085, 358, 135228, 7057	474	740	9095	1.58169	0.77118	0.0110276	0.583554
GOTERM_MF_FAT	GO:0043394~proteoglycan binding	7	1.35397	0.000309643	1513, 4811, 10082, 1289, 1311, 1508, 7057	442	19	8380	6.985	0.23025	0.010413	0.47765
GOTERM_BP_FAT	GO:0030324~lung development	17	3.2882	0.000312383	2033, 57493, 3371, 10365, 10272, 2252, 1116, 23162, 6678, 2260, 4926, 9509, 1490, 83716, 4015, 4323, 7043	474	116	9095	2.812	0.774835	0.0110646	0.589907
GOTERM_BP_FAT	GO:0060541~respiratory system development	18	3.48162	0.000323782	9242, 2033, 57493, 3371, 10365, 10272, 2252, 1116, 23162, 6678, 2260, 4926, 9509, 1490, 83716, 4015, 4323, 7043	474	128	9095	2.69828	0.78676	0.0113817	0.611371
GOTERM_BP_FAT	GO:0014706~striated muscle tissue development	23	4.44874	0.000341024	2006, 6443, 91624, 57496, 2702, 5156, 9242, 2033, 57493, 11214, 90, 1301, 10521, 26585, 5350, 2260, 7168, 4629, 70, 1634, 1827, 57158, 5159	474	190	9095	2.32273	0.803609	0.0118967	0.643829
GOTERM_BP_FAT	GO:0044273~sulfur compound catabolic process	8	1.54739	0.000351895	4060, 2331, 633, 5549, 3425, 1634, 1462, 411	474	27	9095	5.68526	0.81354	0.0121846	0.664288
GOTERM_BP_FAT	GO:0002685~regulation of leukocyte migration	14	2.70793	0.000364298	4681, 2621, 83700, 63940, 5919, 1435, 26585, 5054, 3071, 6387, 728, 6366, 7424, 7057	474	84	9095	3.19796	0.82426	0.0125206	0.687625
GOTERM_MF_FAT	GO:0099600~transmembrane receptor activity	30	5.80271	0.000372763	10267, 25960, 6423, 9902, 728, 558, 8877, 4920, 22801, 57158, 5159, 4360, 5156, 92, 90, 116535, 309, 22821, 2260, 7132, 1909, 929, 8828, 7075, 358, 84168, 6424, 5787, 51310, 2532	442	281	8380	2.02412	0.270243	0.0120439	0.574755
GOTERM_BP_FAT	GO:0045055~regulated exocytosis	20	3.86847	0.000384699	2621, 3671, 5919, 1191, 5175, 2316, 2335, 5170, 11031, 6678, 5054, 23208, 2, 7424, 2162, 7076, 710, 87, 7057, 7043	474	154	9095	2.49192	0.840568	0.0131228	0.726
GOTERM_BP_FAT	GO:0018149~peptide cross-linking	7	1.35397	0.00039757	1281, 7052, 633, 2335, 1634, 2162, 7057	474	20	9095	6.71572	0.850069	0.0134627	0.750203
KEGG_PATHWAY	hsa04270:Vascular smooth muscle contraction	11	2.12766	0.000404301	1909, 10335, 59, 10267, 5320, 4638, 800, 4659, 72, 54776, 10398	177	64	3999	3.88321	0.0743297	0.00641576	0.501766
GOTERM_BP_FAT	GO:0030323~respiratory tube development	17	3.2882	0.000418937	2033, 57493, 3371, 10365, 10272, 2252, 1116, 23162, 6678, 2260, 4926, 9509, 1490, 83716, 4015, 4323, 7043	474	119	9095	2.74111	0.864609	0.0140814	0.790371
GOTERM_BP_FAT	GO:0070527~platelet aggregation	9	1.74081	0.000419727	2621, 114897, 5156, 1465, 2316, 3611, 60, 10398, 87	474	36	9095	4.79694	0.865118	0.0140091	0.791855
GOTERM_BP_FAT	GO:0035295~tube development	35	6.76983	0.000420829	1435, 5919, 2702, 2033, 56034, 10365, 10272, 2252, 6423, 6678, 115908, 4926, 8642, 9509, 83716, 4323, 4015, 7043, 90627, 1281, 5156, 25932, 57493, 90, 3371, 3611, 26585, 23162, 1116, 2260, 1909, 7052, 1490, 9645, 6935	474	356	9095	1.88644	0.865826	0.0139481	0.793926
GOTERM_BP_FAT	GO:0051093~negative regulation of developmental process	39	7.54352	0.000450908	2621, 1290, 8861, 10272, 6423, 149041, 54829, 1809, 6678, 89927, 10631, 4212, 1289, 1827, 6925, 2200, 90627, 1281, 1284, 23213, 5176, 4035, 26585, 8831, 5054, 10743, 7431, 23166, 85458, 3956, 7070, 6695, 7075, 55679, 3400, 7076, 1634, 6935, 7057	474	415	9095	1.80319	0.883774	0.0148348	0.850444
GOTERM_BP_FAT	GO:0030595~leukocyte chemotaxis	15	2.90135	0.000458311	4681, 2621, 83700, 63940, 5919, 1435, 3672, 26585, 5054, 6387, 3071, 728, 6366, 7424, 7057	474	97	9095	2.96718	0.88781	0.0149734	0.864349
GOTERM_BP_FAT	GO:0007596~blood coagulation	23	4.44874	0.000490366	2621, 1281, 5156, 1465, 56034, 2316, 5170, 3611, 10398, 5054, 2, 114897, 558, 25970, 1277, 2162, 1278, 710, 60, 87, 7057, 2191, 5329	474	195	9095	2.26317	0.90373	0.0159037	0.924537
GOTERM_BP_FAT	GO:0030049~muscle filament sliding	6	1.16054	0.000504049	7431, 7169, 7168, 1674, 7171, 70	474	14	9095	8.22333	0.909818	0.0162337	0.950219
GOTERM_BP_FAT	GO:0033275~actin-myosin filament sliding	6	1.16054	0.000504049	7431, 7169, 7168, 1674, 7171, 70	474	14	9095	8.22333	0.909818	0.0162337	0.950219
GOTERM_BP_FAT	GO:0071622~regulation of granulocyte chemotaxis	7	1.35397	0.000532401	3071, 83700, 1435, 5919, 728, 6366, 7057	474	21	9095	6.39592	0.921236	0.0170243	1.00341
GOTERM_BP_FAT	GO:0042476~odontogenesis	12	2.32108	0.000534684	5066, 860, 56975, 1435, 5654, 358, 1277, 3371, 4782, 1278, 54829, 7043	474	66	9095	3.48868	0.922089	0.016983	1.00769
GOTERM_MF_FAT	GO:0038023~signaling receptor activity	32	6.18956	0.000540026	10267, 81035, 25960, 6423, 9902, 728, 558, 10082, 8877, 4920, 22801, 5329, 57158, 5159, 4360, 5156, 92, 90, 116535, 22821, 2260, 7132, 1909, 929, 3685, 8828, 7075, 84168, 6424, 5787, 51310, 2532	442	315	8380	1.92602	0.366468	0.0167633	0.831649
KEGG_PATHWAY	hsa05205:Proteoglycans in cancer	17	3.2882	0.000572711	4313, 2318, 3339, 2316, 2335, 5170, 3693, 2260, 3685, 4060, 3678, 4659, 1634, 54776, 60, 7057, 5329	177	146	3999	2.63072	0.103645	0.00838153	0.71009
GOTERM_BP_FAT	GO:0008283~cell proliferation	86	16.6344	0.000597808	687, 2006, 57343, 1296, 1191, 10290, 2335, 8742, 2252, 127435, 6423, 149041, 6320, 115908, 7168, 8642, 51776, 4920, 8877, 80781, 2191, 5159, 11326, 80279, 4313, 2615, 8406, 4194, 10536, 5176, 4035, 23213, 3611, 3487, 55959, 2260, 1909, 7412, 3685, 3490, 3491, 8828, 1490, 3400, 7077, 7076, 338773, 6935, 2621, 860, 1435, 56034, 6678, 3071, 7041, 728, 1805, 7424, 5654, 4054, 104, 7045, 64175, 4323, …	474	1165	9095	1.41644	0.942363	0.0188441	1.12602
GOTERM_BP_FAT	GO:0009790~embryo development	50	9.67118	0.000598562	91663, 5919, 1290, 1291, 2702, 2335, 6423, 7942, 115908, 7168, 8642, 51776, 3679, 3678, 4920, 1289, 2200, 4313, 1284, 23213, 57493, 55959, 3693, 23162, 2260, 1909, 3685, 3491, 8828, 7075, 1277, 9645, 5930, 6935, 860, 2033, 3213, 8861, 10365, 56034, 83552, 7424, 4323, 7043, 5156, 92, 90, 1301, 26585, 5396	474	587	9095	1.63439	0.94257	0.0187439	1.12744
GOTERM_BP_FAT	GO:0045216~cell-cell junction organization	20	3.86847	0.000623216	91663, 1307, 51564, 2702, 8861, 57493, 10979, 5170, 10580, 1009, 11228, 26585, 7122, 7070, 55679, 1613, 87, 7057, 4323, 7043	474	160	9095	2.39847	0.948948	0.0193815	1.17361
GOTERM_MF_FAT	GO:0004252~serine-type endopeptidase activity	13	2.51451	0.000629942	4313, 64499, 94031, 1513, 716, 715, 5654, 7177, 720, 1508, 4323, 2191, 4320	442	77	8380	3.20092	0.412846	0.0188371	0.969491
GOTERM_CC_FAT	GO:0030054~cell junction	71	13.7331	0.000679184	91663, 83700, 2702, 800, 55082, 55742, 3339, 10580, 7791, 83604, 7122, 23208, 3678, 10487, 4659, 22801, 87, 2191, 5329, 23034, 171024, 5159, 23022, 91624, 57496, 25932, 10867, 5175, 4035, 57493, 5170, 3611, 3716, 309, 3693, 3685, 7070, 4026, 7171, 70, 2318, 2316, 10979, 7145, 9902, 9260, 7041, 2273, 7089, 2275, 720, 60, 4131, 23098, 4323, 3672, 1264, 1465, 392, 3371, 8082, 7431, 85458, 115207, 57…	433	944	8480	1.47297	0.280728	0.00763388	0.969465
GOTERM_BP_FAT	GO:0001667~ameboidal-type cell migration	24	4.64217	0.000685458	51564, 90627, 5175, 5176, 90, 5170, 8742, 2252, 25960, 7145, 3611, 26585, 6678, 9839, 2260, 152007, 8828, 7424, 10487, 7076, 1634, 7057, 2191, 411	474	213	9095	2.162	0.962074	0.0211594	1.29011
GOTERM_BP_FAT	GO:0006022~aminoglycan metabolic process	15	2.90135	0.000695069	3339, 633, 5549, 22856, 1116, 2517, 55454, 4060, 10082, 2331, 1634, 3425, 1462, 411, 5159	474	101	9095	2.84967	0.963776	0.0213152	1.30808
GOTERM_MF_FAT	GO:0004888~transmembrane signaling receptor activity	28	5.41586	0.000727028	10267, 25960, 6423, 9902, 728, 558, 8877, 4920, 22801, 57158, 5159, 4360, 5156, 92, 90, 116535, 22821, 2260, 7132, 1909, 929, 8828, 7075, 84168, 6424, 5787, 2532, 51310	442	265	8380	2.00324	0.459122	0.0209688	1.11812
GOTERM_BP_FAT	GO:0030207~chondroitin sulfate catabolic process	5	0.967118	0.000738189	633, 3425, 1634, 1462, 411	474	9	9095	10.6599	0.970517	0.0224786	1.3887
GOTERM_BP_FAT	GO:0050817~coagulation	23	4.44874	0.000793776	2621, 1281, 5156, 1465, 56034, 2316, 5170, 3611, 10398, 5054, 2, 114897, 558, 25970, 1277, 2162, 1278, 710, 60, 87, 7057, 2191, 5329	474	202	9095	2.18475	0.977391	0.0239984	1.49253
GOTERM_BP_FAT	GO:0044057~regulation of system process	23	4.44874	0.000793776	2621, 1264, 2702, 1760, 11214, 2316, 114907, 10398, 309, 27129, 5350, 126393, 2260, 5997, 7168, 114897, 1674, 358, 29995, 1490, 8877, 53826, 1613	474	202	9095	2.18475	0.977391	0.0239984	1.49253
GOTERM_BP_FAT	GO:0097529~myeloid leukocyte migration	13	2.51451	0.000811435	4681, 83700, 5919, 1435, 3672, 26585, 5054, 3071, 6387, 728, 6366, 7424, 7057	474	80	9095	3.11801	0.979219	0.0243716	1.52549
GOTERM_BP_FAT	GO:0008015~blood circulation	24	4.64217	0.000832398	2621, 2006, 59, 3672, 2702, 1760, 5742, 2316, 27129, 5350, 1909, 6387, 5997, 11188, 7168, 1674, 10631, 7424, 1490, 70, 53826, 1278, 710, 1827	474	216	9095	2.13197	0.981199	0.0248373	1.5646
GOTERM_BP_FAT	GO:0007599~hemostasis	23	4.44874	0.000848248	2621, 1281, 5156, 1465, 56034, 2316, 5170, 3611, 10398, 5054, 2, 114897, 558, 25970, 1277, 2162, 1278, 710, 60, 87, 7057, 2191, 5329	474	203	9095	2.17398	0.98257	0.0251473	1.59417
GOTERM_CC_FAT	GO:0099503~secretory vesicle	24	4.64217	0.000851805	5066, 3671, 2621, 5919, 3672, 5320, 1191, 5175, 2335, 10272, 1809, 6678, 5054, 23208, 2, 7424, 1277, 2162, 7076, 710, 87, 7057, 4016, 7043	433	221	8480	2.1268	0.338537	0.00934923	1.21447
GOTERM_BP_FAT	GO:0035924~cellular response to vascular endothelial growth factor stimulus	8	1.54739	0.000869732	2619, 7412, 8828, 5156, 1634, 25960, 5159, 6925	474	31	9095	4.95168	0.98427	0.0256172	1.63423
GOTERM_BP_FAT	GO:0002687~positive regulation of leukocyte migration	11	2.12766	0.000949683	2621, 6387, 3071, 63940, 1435, 5919, 728, 6366, 7424, 7057, 5054	474	60	9095	3.51776	0.989263	0.0277689	1.78319
KEGG_PATHWAY	hsa04060:Cytokine-cytokine receptor interaction	12	2.32108	0.000985888	6387, 1435, 6366, 5156, 7424, 92, 90, 56034, 8742, 7043, 5159, 7132	177	84	3999	3.2276	0.171715	0.0133668	1.2195
GOTERM_MF_FAT	GO:0050431~transforming growth factor beta binding	6	1.16054	0.00106254	3685, 90, 4054, 135228, 7057, 7043	442	16	8380	7.10973	0.592748	0.0295002	1.63017
GOTERM_MF_FAT	GO:0003779~actin binding	27	5.22244	0.00106386	2318, 800, 2316, 55742, 10580, 7145, 7456, 7169, 7168, 4638, 51088, 2275, 10487, 87, 25802, 170954, 171024, 23022, 91624, 1264, 23345, 85458, 6876, 4629, 7171, 84168, 9645	442	258	8380	1.98411	0.593204	0.0285974	1.63218
GOTERM_BP_FAT	GO:0006939~smooth muscle contraction	8	1.54739	0.00106418	1909, 5997, 59, 4638, 23213, 4629, 8877, 55959	474	32	9095	4.79694	0.993786	0.0308772	1.99612
GOTERM_BP_FAT	GO:0060193~positive regulation of lipase activity	8	1.54739	0.00106418	1909, 440503, 728, 3491, 5156, 5170, 5159, 2260	474	32	9095	4.79694	0.993786	0.0308772	1.99612
GOTERM_MF_FAT	GO:0098772~molecular function regulator	65	12.5725	0.00107058	1293, 241, 1760, 2335, 127435, 2252, 6423, 81669, 131578, 57139, 4659, 1827, 5159, 10231, 7837, 90627, 5118, 57496, 11142, 8490, 5176, 633, 5170, 3716, 8831, 85360, 2260, 5507, 2, 10628, 7070, 414059, 23263, 6695, 7077, 7076, 2621, 63940, 4684, 55160, 2316, 9905, 5662, 54829, 5350, 3071, 51306, 720, 5863, 4323, 392, 5156, 11214, 26585, 130872, 5054, 22821, 9839, 115557, 152273, 729873, 5997, 1634…	442	832	8380	1.48119	0.59551	0.027889	1.64241
GOTERM_BP_FAT	GO:0022008~neurogenesis	62	11.9923	0.00111834	83700, 1191, 2335, 1009, 6423, 115908, 8642, 23373, 4826, 6925, 80279, 1281, 4035, 5176, 5549, 3611, 23162, 8831, 2260, 3956, 6938, 7070, 3913, 8828, 6695, 10100, 2331, 3400, 7077, 1613, 6935, 2621, 4681, 860, 1435, 4684, 23531, 8861, 3213, 1809, 1808, 89927, 10631, 7424, 83552, 558, 1462, 4131, 23098, 4323, 411, 6586, 91653, 3672, 54587, 3371, 10417, 7431, 85458, 6387, 5396, 4060	474	794	9095	1.49829	0.995203	0.0322282	2.09671
GOTERM_BP_FAT	GO:0001952~regulation of cell-matrix adhesion	12	2.32108	0.00113585	1307, 1435, 6366, 10631, 7424, 8861, 3611, 26585, 1613, 7057, 4323, 5054	474	72	9095	3.19796	0.995588	0.0325283	2.12919
GOTERM_BP_FAT	GO:0032989~cellular component morphogenesis	60	11.6054	0.00113708	91663, 1191, 55742, 2335, 1009, 6423, 7456, 7168, 3679, 10487, 80781, 87, 5159, 23022, 25932, 5175, 57493, 5549, 3611, 23162, 8831, 3685, 7070, 3913, 8828, 2331, 1277, 70, 1613, 4681, 26140, 51715, 4684, 2033, 10365, 2316, 10979, 1808, 7041, 10631, 558, 4131, 25802, 23098, 7043, 6586, 91653, 755, 3672, 5156, 90, 26585, 10417, 6387, 152273, 729873, 152007, 4060, 4629, 84168	474	762	9095	1.51085	0.995614	0.0323689	2.13148
GOTERM_BP_FAT	GO:0032103~positive regulation of response to external stimulus	17	3.2882	0.0012144	2621, 63940, 5919, 1435, 5320, 241, 5054, 7132, 2260, 3071, 6387, 728, 7052, 6366, 7424, 7057, 5159	474	131	9095	2.49002	0.996968	0.0343284	2.27483
GOTERM_BP_FAT	GO:0032101~regulation of response to external stimulus	36	6.96325	0.00123601	2621, 4681, 83700, 63940, 1435, 5919, 241, 7791, 25960, 23208, 3071, 728, 114897, 5654, 7424, 720, 5740, 5329, 2191, 5159, 5320, 5156, 5176, 26585, 25959, 5054, 340061, 2260, 7132, 6387, 2, 7052, 6366, 135228, 710, 7057	474	393	9095	1.75766	0.997266	0.0347233	2.31487
GOTERM_BP_FAT	GO:0042692~muscle cell differentiation	23	4.44874	0.00124791	91653, 6443, 91624, 57496, 5156, 1760, 2318, 11214, 90, 10290, 3611, 8038, 26585, 23345, 3956, 7168, 4629, 70, 25802, 1827, 6935, 4323, 5159	474	209	9095	2.11157	0.997417	0.0348472	2.33692
GOTERM_BP_FAT	GO:0006029~proteoglycan metabolic process	10	1.93424	0.00128361	55454, 23213, 633, 3425, 1634, 1301, 22856, 1462, 55959, 411	474	52	9095	3.68995	0.997822	0.0356183	2.403
GOTERM_BP_FAT	GO:0097435~fibril organization	6	1.16054	0.0013682	1281, 4239, 4053, 1289, 3611, 8076	474	17	9095	6.77215	0.998546	0.0377034	2.55943
GOTERM_MF_FAT	GO:0061134~peptidase regulator activity	15	2.90135	0.00137853	2621, 1293, 5118, 5176, 2335, 6423, 5054, 2, 6695, 7077, 7076, 720, 135228, 710, 4323	442	107	8380	2.65784	0.688285	0.0347066	2.11015
GOTERM_BP_FAT	GO:0032970~regulation of actin filament-based process	24	4.64217	0.00144836	91663, 5066, 83700, 2006, 2702, 5156, 4035, 11214, 2316, 55160, 3611, 7456, 5350, 85458, 3071, 6387, 7168, 6366, 1490, 1613, 25802, 7043, 5159, 171024	474	225	9095	2.04669	0.999009	0.0396407	2.70743
GOTERM_BP_FAT	GO:0051336~regulation of hydrolase activity	65	12.5725	0.0014539	1293, 2335, 2252, 6423, 440503, 7169, 7168, 57139, 4659, 5329, 5159, 80279, 90627, 5118, 8490, 4035, 5176, 5170, 3716, 9814, 8831, 85360, 2260, 1909, 2, 3491, 7070, 414059, 23263, 6366, 6695, 7077, 1490, 7076, 2621, 4684, 55160, 9905, 5662, 5350, 3071, 728, 51306, 720, 5863, 4323, 9891, 3672, 392, 5156, 11214, 9236, 130872, 5054, 22821, 115557, 152273, 5997, 729873, 9665, 358, 84168, 710, 135228,…	474	851	9095	1.46558	0.999035	0.0395628	2.71766
GOTERM_BP_FAT	GO:0030204~chondroitin sulfate metabolic process	7	1.35397	0.00145525	55454, 633, 3425, 1634, 22856, 1462, 411	474	25	9095	5.37257	0.999041	0.0393743	2.72014
GOTERM_BP_FAT	GO:0010518~positive regulation of phospholipase activity	7	1.35397	0.00145525	1909, 728, 3491, 5156, 5170, 5159, 2260	474	25	9095	5.37257	0.999041	0.0393743	2.72014
GOTERM_BP_FAT	GO:0070252~actin-mediated cell contraction	9	1.74081	0.00146065	7431, 7169, 7168, 1674, 2702, 2316, 55742, 7171, 70	474	43	9095	4.01604	0.999065	0.0392952	2.73011
GOTERM_BP_FAT	GO:0031032~actomyosin structure organization	14	2.70793	0.0014666	2006, 1264, 5156, 55160, 10580, 7791, 3693, 7168, 1490, 4629, 70, 25802, 5159, 7043	474	97	9095	2.76937	0.999092	0.0392312	2.74108
GOTERM_BP_FAT	GO:0006897~endocytosis	36	6.96325	0.00147318	2621, 10267, 81035, 22918, 11031, 9902, 7456, 6678, 23208, 9260, 1808, 3071, 11037, 558, 10487, 720, 60, 284297, 4360, 84286, 8406, 5175, 4035, 26585, 10417, 5054, 23166, 929, 3685, 7052, 6366, 9332, 4240, 2212, 6424, 7057	474	397	9095	1.73995	0.99912	0.0391843	2.75321
GOTERM_BP_FAT	GO:0050767~regulation of neurogenesis	36	6.96325	0.00147318	4681, 1435, 23531, 3213, 2335, 6423, 1809, 1808, 89927, 23373, 7424, 4131, 23098, 6925, 411, 6586, 80279, 1281, 5176, 4035, 3611, 23162, 8831, 2260, 7431, 85458, 6387, 3956, 5396, 7070, 6938, 6695, 2331, 7077, 3400, 6935	474	397	9095	1.73995	0.99912	0.0391843	2.75321
GOTERM_BP_FAT	GO:0048738~cardiac muscle tissue development	15	2.90135	0.00148606	6443, 91624, 2702, 5156, 11214, 57493, 90, 1301, 26585, 5350, 2260, 7168, 4629, 70, 5159	474	109	9095	2.64052	0.999172	0.0393016	2.77697
GOTERM_BP_FAT	GO:0072376~protein activation cascade	8	1.54739	0.00155439	716, 2, 728, 1191, 715, 720, 710, 11326	474	34	9095	4.51477	0.999403	0.0408463	2.90288
GOTERM_BP_FAT	GO:0009968~negative regulation of signal transduction	57	11.0251	0.00155846	91663, 1191, 127435, 25960, 6423, 440503, 90993, 115908, 131578, 4920, 112464, 5329, 2200, 80279, 1859, 51564, 7837, 8490, 4035, 23213, 633, 5170, 3487, 55959, 8831, 3685, 929, 7070, 7077, 2621, 4681, 860, 10272, 54829, 7041, 7089, 5654, 8483, 23098, 4323, 7043, 6586, 56937, 3672, 84662, 90, 94031, 26585, 25959, 5054, 22821, 6387, 5997, 1634, 135228, 6424, 7057	474	724	9095	1.51064	0.999414	0.0407272	2.91038
GOTERM_CC_FAT	GO:0043230~extracellular organelle	127	24.5648	0.00158475	1292, 91663, 1293, 1291, 1191, 1106, 3339, 2335, 1009, 1311, 79901, 4926, 10487, 1289, 5159, 2200, 11326, 1284, 5175, 5176, 5742, 8404, 5549, 3693, 165, 116496, 7412, 2, 929, 3685, 3490, 7070, 23452, 3913, 7077, 7171, 7076, 3910, 81617, 8537, 1278, 2212, 2621, 1435, 51715, 81035, 22795, 10875, 56034, 2316, 4638, 83716, 720, 7045, 1508, 411, 10516, 56975, 1306, 4239, 1465, 392, 10417, 1116, 5054, …	433	1958	8480	1.27028	0.536623	0.0169484	2.24847
GOTERM_CC_FAT	GO:1903561~extracellular vesicle	127	24.5648	0.00158475	1292, 91663, 1293, 1291, 1191, 1106, 3339, 2335, 1009, 1311, 79901, 4926, 10487, 1289, 5159, 2200, 11326, 1284, 5175, 5176, 5742, 8404, 5549, 3693, 165, 116496, 7412, 2, 929, 3685, 3490, 7070, 23452, 3913, 7077, 7171, 7076, 3910, 81617, 8537, 1278, 2212, 2621, 1435, 51715, 81035, 22795, 10875, 56034, 2316, 4638, 83716, 720, 7045, 1508, 411, 10516, 56975, 1306, 4239, 1465, 392, 10417, 1116, 5054, …	433	1958	8480	1.27028	0.536623	0.0169484	2.24847
GOTERM_BP_FAT	GO:0030203~glycosaminoglycan metabolic process	14	2.70793	0.00161293	3339, 633, 5549, 22856, 2517, 55454, 4060, 2331, 10082, 1634, 3425, 1462, 411, 5159	474	98	9095	2.74111	0.999549	0.0418922	3.01063
GOTERM_CC_FAT	GO:0016528~sarcoplasm	8	1.54739	0.00164621	813, 10335, 6695, 1760, 2318, 7057, 57158, 5350	433	35	8480	4.47641	0.550253	0.0172211	2.33471
GOTERM_BP_FAT	GO:0045664~regulation of neuron differentiation	31	5.99613	0.00164978	4681, 23531, 2335, 6423, 1809, 1808, 23373, 4131, 23098, 6925, 411, 6586, 80279, 5176, 4035, 3611, 8831, 23162, 2260, 7431, 85458, 6387, 3956, 5396, 7070, 6938, 6695, 2331, 3400, 7077, 6935	474	326	9095	1.8246	0.999621	0.0425978	3.0784
GOTERM_BP_FAT	GO:0034109~homotypic cell-cell adhesion	10	1.93424	0.00169214	2621, 3956, 114897, 5156, 1465, 2316, 3611, 60, 10398, 87	474	54	9095	3.55329	0.999691	0.0434335	3.15624
GOTERM_BP_FAT	GO:0071230~cellular response to amino acid stimulus	9	1.74081	0.00170571	1307, 1281, 4313, 1290, 1291, 1277, 56034, 1278, 6935	474	44	9095	3.92477	0.99971	0.0435405	3.18117
GOTERM_BP_FAT	GO:0050655~dermatan sulfate proteoglycan metabolic process	5	0.967118	0.00177853	55454, 633, 3425, 1634, 1462	474	11	9095	8.72171	0.999795	0.0451173	3.31482
GOTERM_BP_FAT	GO:0045667~regulation of osteoblast differentiation	12	2.32108	0.00178533	51564, 860, 56975, 115908, 3491, 92, 90, 3400, 3611, 6423, 338773, 9260	474	76	9095	3.02965	0.999802	0.0450468	3.32729
GOTERM_BP_FAT	GO:0006956~complement activation	7	1.35397	0.00181	716, 2, 1191, 715, 720, 710, 11326	474	26	9095	5.16594	0.999824	0.0454157	3.37253
GOTERM_BP_FAT	GO:0050654~chondroitin sulfate proteoglycan metabolic process	7	1.35397	0.00181	55454, 633, 3425, 1634, 22856, 1462, 411	474	26	9095	5.16594	0.999824	0.0454157	3.37253
KEGG_PATHWAY	hsa04145:Phagosome	13	2.51451	0.00181159	4360, 81035, 1783, 1311, 3693, 9902, 929, 3685, 715, 3678, 60, 2212, 7057	177	104	3999	2.82415	0.29272	0.022824	2.23031
GOTERM_BP_FAT	GO:0002063~chondrocyte development	6	1.16054	0.00181438	860, 23213, 1301, 22856, 55959, 6423	474	18	9095	6.39592	0.999828	0.0452853	3.38057
GOTERM_BP_FAT	GO:0001934~positive regulation of protein phosphorylation	44	8.51064	0.00182066	2621, 1435, 5919, 1191, 23531, 56034, 2252, 6423, 3071, 728, 81669, 114897, 51776, 7424, 3678, 112464, 8877, 5329, 7043, 5159, 2200, 29990, 3672, 5320, 5156, 92, 5175, 11214, 90, 5170, 3611, 3487, 26585, 23162, 1116, 116496, 2260, 7132, 3491, 152007, 6366, 7077, 1490, 7057	474	524	9095	1.61119	0.999833	0.0452024	3.39207
GOTERM_BP_FAT	GO:0030168~platelet activation	14	2.70793	0.00194198	2621, 1281, 5156, 1465, 2316, 5170, 3611, 10398, 114897, 558, 1277, 1278, 60, 87	474	100	9095	2.68629	0.999906	0.0478951	3.61418
GOTERM_CC_FAT	GO:0070062~extracellular exosome	126	24.3714	0.00197452	1292, 91663, 1293, 1291, 1191, 1106, 3339, 2335, 1009, 1311, 79901, 4926, 10487, 1289, 5159, 2200, 11326, 1284, 5175, 5176, 5742, 8404, 5549, 3693, 165, 116496, 7412, 2, 929, 3685, 3490, 7070, 23452, 3913, 7077, 7171, 7076, 3910, 81617, 8537, 1278, 2212, 2621, 1435, 51715, 81035, 22795, 10875, 56034, 2316, 4638, 83716, 720, 7045, 1508, 411, 10516, 56975, 1306, 4239, 1465, 392, 10417, 1116, 5054, …	433	1951	8480	1.2648	0.616566	0.0201889	2.79423
GOTERM_BP_FAT	GO:0030048~actin filament-based movement	11	2.12766	0.00201128	7431, 7169, 7168, 1674, 2702, 2316, 55742, 7171, 70, 7456, 5350	474	66	9095	3.19796	0.999933	0.0493086	3.74085
GOTERM_CC_FAT	GO:0031988~membrane-bounded vesicle	150	29.0135	0.00201147	91663, 1292, 1293, 1291, 1191, 3339, 1106, 2335, 1009, 1311, 79901, 4926, 10487, 4920, 1289, 5159, 2200, 11326, 1284, 5175, 5176, 4035, 5742, 8404, 5549, 5170, 165, 3693, 116496, 7412, 2, 929, 3685, 3490, 7070, 23452, 3913, 1277, 7077, 7171, 2162, 3910, 7076, 81617, 1278, 8537, 2212, 2621, 1435, 51715, 81035, 22795, 10875, 56034, 2316, 10272, 9905, 22918, 11031, 6678, 728, 4638, 7424, 83716, 720,…	433	2392	8480	1.22811	0.623391	0.0201392	2.84582
GOTERM_BP_FAT	GO:0034332~adherens junction organization	13	2.51451	0.00209404	1307, 8861, 10580, 5170, 10979, 1009, 11228, 26585, 7070, 1613, 87, 7057, 4323	474	89	9095	2.80271	0.999955	0.051025	3.89189
GOTERM_BP_FAT	GO:0030500~regulation of bone mineralization	8	1.54739	0.0022046	4256, 56975, 92, 56172, 90, 26585, 338773, 7043	474	36	9095	4.26395	0.999973	0.0533767	4.09334
GOTERM_BP_FAT	GO:0030514~negative regulation of BMP signaling pathway	7	1.35397	0.0022266	4681, 5654, 10272, 26585, 6423, 94031, 2200	474	27	9095	4.97461	0.999976	0.0536236	4.13338
GOTERM_BP_FAT	GO:0048699~generation of neurons	57	11.0251	0.00225295	83700, 2335, 1009, 6423, 115908, 23373, 4826, 6925, 80279, 1281, 4035, 5176, 5549, 3611, 23162, 8831, 2260, 3956, 6938, 7070, 3913, 8828, 6695, 10100, 2331, 3400, 7077, 1613, 6935, 2621, 4681, 860, 1435, 4684, 23531, 8861, 3213, 1809, 1808, 89927, 10631, 7424, 83552, 558, 4131, 23098, 411, 6586, 91653, 3672, 3371, 10417, 7431, 85458, 6387, 5396, 4060	474	736	9095	1.48601	0.999979	0.0539695	4.18131
GOTERM_BP_FAT	GO:0098602~single organism cell adhesion	40	7.73694	0.00236013	91663, 2621, 860, 83700, 1296, 22890, 2316, 55742, 10272, 10979, 2335, 22918, 149041, 10398, 3071, 114897, 10631, 3679, 558, 3678, 60, 87, 11326, 2615, 1465, 5156, 90, 5170, 3611, 3693, 3685, 6387, 7412, 3956, 3491, 7070, 6366, 55679, 84168, 6935	474	469	9095	1.63648	0.999987	0.0561849	4.37605
GOTERM_BP_FAT	GO:0045937~positive regulation of phosphate metabolic process	48	9.28433	0.00238838	2621, 1435, 5919, 10267, 1191, 23531, 56034, 2252, 6423, 3071, 728, 81669, 114897, 51776, 7424, 10487, 3678, 4659, 8877, 112464, 5329, 7043, 5159, 2200, 29990, 3672, 5320, 5156, 92, 5175, 11214, 90, 5170, 3611, 3487, 26585, 23162, 1116, 116496, 2260, 7132, 1909, 3491, 152007, 6366, 7077, 1490, 7057	474	594	9095	1.55053	0.999989	0.0565569	4.4273
GOTERM_BP_FAT	GO:0010562~positive regulation of phosphorus metabolic process	48	9.28433	0.00238838	2621, 1435, 5919, 10267, 1191, 23531, 56034, 2252, 6423, 3071, 728, 81669, 114897, 51776, 7424, 10487, 3678, 4659, 8877, 112464, 5329, 7043, 5159, 2200, 29990, 3672, 5320, 5156, 92, 5175, 11214, 90, 5170, 3611, 3487, 26585, 23162, 1116, 116496, 2260, 7132, 1909, 3491, 152007, 6366, 7077, 1490, 7057	474	594	9095	1.55053	0.999989	0.0565569	4.4273
GOTERM_MF_FAT	GO:0061135~endopeptidase regulator activity	12	2.32108	0.0024129	2621, 1293, 2, 6695, 5176, 7077, 7076, 720, 710, 135228, 6423, 5054	442	78	8380	2.91681	0.870149	0.0582733	3.66606
GOTERM_BP_FAT	GO:0048585~negative regulation of response to stimulus	66	12.766	0.00247814	91663, 1191, 127435, 25960, 6423, 149041, 440503, 90993, 115908, 114897, 131578, 4920, 112464, 5740, 5329, 2200, 80279, 51564, 1859, 7837, 1281, 8490, 4035, 23213, 5176, 633, 5170, 3487, 55959, 8831, 7132, 3685, 2, 929, 7070, 7077, 2621, 4681, 860, 10272, 54829, 7041, 7089, 5654, 8483, 23098, 4323, 7043, 6586, 56937, 3672, 5156, 90, 84662, 94031, 26585, 25959, 5054, 22821, 6387, 5997, 1634, 710, …	474	886	9095	1.42934	0.999993	0.0583329	4.59002
GOTERM_BP_FAT	GO:0032836~glomerular basement membrane development	4	0.773694	0.00248432	3913, 4811, 23213, 55959	474	6	9095	12.7918	0.999993	0.0581876	4.60121
GOTERM_BP_FAT	GO:0070208~protein heterotrimerization	5	0.967118	0.00255904	1292, 1291, 114897, 1277, 1278	474	12	9095	7.9949	0.999995	0.0595945	4.73644
GOTERM_BP_FAT	GO:0009967~positive regulation of signal transduction	67	12.9594	0.00256675	1191, 10580, 8742, 6423, 149041, 114897, 51776, 3678, 29995, 4920, 8877, 112464, 5740, 5329, 5159, 80279, 6451, 1281, 5320, 8406, 5175, 23213, 3611, 3487, 55959, 23162, 2260, 7132, 3956, 3491, 23263, 6366, 25970, 1490, 7077, 1277, 1613, 2621, 1435, 56034, 2316, 22856, 10521, 7041, 728, 558, 5863, 57158, 7043, 79176, 3672, 392, 5156, 92, 11214, 90, 26585, 1116, 8085, 85458, 5396, 152007, 7052, 556…	474	904	9095	1.4221	0.999995	0.059479	4.75038
GOTERM_BP_FAT	GO:0032835~glomerulus development	8	1.54739	0.00259965	59, 3913, 4811, 5156, 5175, 23213, 55959, 5159	474	37	9095	4.14871	0.999996	0.0599285	4.80986
GOTERM_BP_FAT	GO:0009612~response to mechanical stimulus	15	2.90135	0.00269351	1281, 3371, 1301, 1116, 7132, 6387, 10628, 10631, 358, 4212, 1277, 1634, 1827, 7057, 4323	474	116	9095	2.48118	0.999997	0.0617291	4.97935
GOTERM_CC_FAT	GO:0008305~integrin complex	6	1.16054	0.00274971	3685, 3672, 3679, 3678, 22801, 3693	433	20	8480	5.87529	0.736959	0.026886	3.87124
GOTERM_CC_FAT	GO:0098636~protein complex involved in cell adhesion	6	1.16054	0.00274971	3685, 3672, 3679, 3678, 22801, 3693	433	20	8480	5.87529	0.736959	0.026886	3.87124
KEGG_PATHWAY	hsa04611:Platelet activation	11	2.12766	0.003751	1281, 1290, 4638, 5742, 1277, 4659, 1289, 1301, 1278, 60, 2212	177	85	3999	2.92383	0.51217	0.0438704	4.56722
Cancer Type:	BRCA
Positive Correlations
GOTERM_BP_FAT	GO:1903047~mitotic cell cycle process	146	22.9199	5.12968e-38	2146, 84930, 8883, 29127, 6873, 332, 7298, 10403, 1104, 9861, 22974, 54908, 6491, 10926, 27338, 10615, 3925, 81620, 54892, 7283, 79892, 9918, 10907, 9735, 79980, 4605, 11004, 80218, 55055, 9055, 55215, 126731, 81610, 55726, 11130, 23397, 51203, 113130, 128239, 348654, 22919, 54888, 9221, 348235, 55165, 23198, 3320, 5347, 10112, 84515, 9631, 4173, 4175, 890, 3837, 55872, 699, 3833, 4436, 10213, 38…	598	719	9126	3.09887	2.36478e-34	2.36478e-34	9.67861e-35
GOTERM_BP_FAT	GO:0022402~cell cycle process	173	27.1586	4.13189e-36	2146, 84930, 8883, 29127, 6873, 332, 7298, 10403, 1104, 9861, 22974, 54908, 6491, 79682, 10926, 27338, 10615, 87178, 3925, 2956, 26973, 1894, 8872, 81620, 6009, 54892, 7283, 79892, 9918, 5036, 10907, 79980, 9735, 7884, 4605, 11004, 80218, 10097, 10096, 55055, 9055, 29980, 55215, 126731, 11130, 55726, 81610, 7514, 23397, 51203, 113130, 128239, 348654, 22919, 54888, 9221, 348235, 25909, 55165, 2319…	598	1000	9126	2.64013	1.9048e-32	9.524e-33	7.79599e-33
GOTERM_BP_FAT	GO:0000278~mitotic cell cycle	148	23.2339	3.89577e-35	2146, 84930, 8883, 29127, 6873, 332, 7298, 10403, 1104, 9861, 22974, 54908, 6491, 10926, 27338, 10615, 3925, 81620, 54892, 7283, 79892, 9918, 10907, 9735, 79980, 4605, 11004, 80218, 55055, 9055, 55215, 126731, 81610, 55726, 11130, 23397, 51203, 113130, 128239, 348654, 22919, 54888, 9221, 348235, 55165, 23198, 3320, 5347, 10112, 84515, 9631, 4173, 4175, 890, 3837, 55872, 699, 3833, 4436, 10213, 38…	598	778	9126	2.9031	1.79595e-31	5.98649e-32	7.35048e-32
GOTERM_BP_FAT	GO:0007049~cell cycle	183	28.7284	9.41352e-30	2146, 84930, 8883, 29127, 6873, 332, 7298, 10403, 1104, 9861, 22974, 54908, 6491, 79682, 10926, 27338, 10615, 87178, 3925, 29128, 2956, 10713, 26973, 1894, 8872, 81620, 6009, 54892, 7283, 79892, 9918, 5036, 10907, 79980, 9735, 734, 7884, 4605, 11004, 80218, 10097, 10096, 55055, 8208, 9055, 29980, 9156, 55215, 126731, 11130, 55726, 81610, 7514, 23397, 51203, 113130, 205564, 128239, 348654, 22919, …	598	1225	9126	2.27979	4.33963e-26	1.08491e-26	1.77613e-26
GOTERM_BP_FAT	GO:0007059~chromosome segregation	72	11.303	2.42148e-29	64151, 29127, 332, 10403, 1104, 24137, 54908, 9700, 79682, 10615, 9493, 701, 5885, 9793, 1894, 6732, 3619, 23212, 79892, 57122, 9918, 79980, 9735, 11004, 10097, 80218, 10096, 4751, 55055, 9787, 4085, 9055, 10051, 10460, 9319, 11130, 81610, 7514, 23397, 113130, 51203, 348654, 22919, 348235, 55165, 25909, 90417, 9126, 55839, 5347, 55355, 2177, 7272, 55143, 11065, 3837, 699, 79677, 7150, 3833, 3832,…	598	237	9126	4.63621	1.1163e-25	2.2326e-26	4.56881e-26
GOTERM_BP_FAT	GO:0098813~nuclear chromosome segregation	65	10.2041	1.31375e-28	64151, 29127, 332, 10403, 24137, 54908, 9700, 79682, 10615, 9493, 701, 5885, 9793, 3619, 23212, 79892, 57122, 9918, 79980, 9735, 11004, 80218, 10097, 10096, 4751, 55055, 9787, 4085, 9055, 10051, 10460, 9319, 11130, 81610, 7514, 23397, 51203, 113130, 348654, 22919, 348235, 55165, 25909, 90417, 9126, 55839, 5347, 2177, 7272, 55143, 11065, 3837, 699, 3833, 7153, 1063, 1062, 9232, 2237, 83540, 990, 9…	598	198	9126	5.00988	6.05637e-25	1.00939e-25	2.47876e-25
GOTERM_BP_FAT	GO:0048285~organelle fission	97	15.2276	5.40601e-28	79184, 84930, 64151, 29127, 332, 10403, 1104, 22974, 24137, 54908, 9700, 983, 27338, 10615, 9493, 9650, 2956, 5885, 701, 9793, 259266, 3619, 23212, 54892, 10059, 79892, 9918, 7443, 10907, 79980, 9735, 4605, 11004, 80218, 10097, 4976, 10096, 9585, 4751, 55055, 9787, 9055, 4085, 10051, 10460, 126731, 9319, 11130, 55726, 81610, 23397, 51203, 113130, 348654, 22919, 54888, 9221, 6790, 348235, 55165, 9…	598	434	9126	3.41084	2.49217e-24	3.56024e-25	1.02e-24
GOTERM_BP_FAT	GO:0000280~nuclear division	93	14.5997	7.98139e-28	79184, 84930, 64151, 29127, 332, 10403, 1104, 24137, 22974, 54908, 9700, 983, 27338, 10615, 9493, 2956, 701, 5885, 9793, 259266, 3619, 54892, 23212, 79892, 9918, 7443, 10907, 79980, 9735, 4605, 11004, 10097, 80218, 9585, 10096, 4751, 55055, 9787, 4085, 9055, 10051, 10460, 9319, 126731, 81610, 11130, 55726, 23397, 113130, 51203, 348654, 22919, 54888, 9221, 6790, 348235, 55165, 90417, 9126, 55839, …	598	404	9126	3.51302	3.67942e-24	4.59928e-25	1.50592e-24
GOTERM_BP_FAT	GO:0000819~sister chromatid segregation	59	9.26217	3.11486e-27	64151, 29127, 332, 10403, 24137, 54908, 9700, 79682, 10615, 9493, 701, 5885, 9793, 3619, 23212, 79892, 9918, 57122, 79980, 9735, 11004, 80218, 4751, 55055, 9787, 4085, 9055, 10051, 10460, 11130, 7514, 23397, 51203, 113130, 348654, 22919, 348235, 55165, 25909, 90417, 9126, 55839, 5347, 7272, 55143, 3837, 11065, 699, 3833, 7153, 1063, 1062, 2237, 83540, 990, 991, 151246, 891, 81929	598	171	9126	5.26545	1.43595e-23	1.5955e-24	5.87708e-24
GOTERM_BP_FAT	GO:0007067~mitotic nuclear division	82	12.8728	4.37451e-26	79184, 84930, 64151, 29127, 332, 10403, 1104, 24137, 22974, 54908, 9700, 983, 27338, 10615, 9493, 701, 5885, 9793, 259266, 3619, 54892, 23212, 79892, 9918, 7443, 10907, 79980, 9735, 4605, 11004, 80218, 9585, 4751, 55055, 9787, 4085, 9055, 10051, 10460, 126731, 81610, 11130, 55726, 23397, 113130, 51203, 348654, 22919, 54888, 9221, 6790, 348235, 55165, 90417, 9126, 55839, 5347, 7272, 55143, 11065, …	598	338	9126	3.70234	2.01665e-22	2.01665e-23	8.25378e-23
GOTERM_BP_FAT	GO:0051301~cell division	91	14.2857	1.74678e-24	79184, 84930, 64151, 29127, 332, 10403, 1104, 24137, 22974, 54908, 9700, 983, 27338, 10615, 9493, 3925, 701, 5885, 10713, 9793, 259266, 1894, 8872, 3619, 54892, 79892, 9918, 7443, 10907, 10376, 79980, 9735, 11004, 10097, 9585, 10096, 5500, 4751, 55055, 4085, 9055, 10051, 10460, 126731, 81610, 11130, 55726, 23397, 113130, 51203, 205564, 22919, 54888, 6790, 348235, 55165, 25909, 90417, 9126, 5347, …	598	429	9126	3.23715	8.05264e-21	7.32058e-22	3.2958e-21
GOTERM_CC_FAT	GO:0000793~condensed chromosome	52	8.16327	2.14524e-23	3148, 64151, 332, 10403, 1104, 54908, 79682, 10615, 701, 5885, 9793, 3619, 7283, 23212, 9918, 57122, 79980, 9735, 11004, 4751, 55055, 4085, 10051, 11335, 11130, 11073, 23397, 113130, 6790, 8815, 348235, 25909, 90417, 9126, 55839, 5347, 84365, 55355, 2177, 699, 79677, 1017, 7153, 1063, 1062, 3014, 10128, 83540, 4288, 151246, 891, 81929	602	145	8510	5.06954	1.62609e-20	1.62609e-20	3.26962e-20
GOTERM_MF_FAT	GO:0003723~RNA binding	177	27.7865	1.54604e-21	2146, 51575, 3148, 3149, 54517, 7295, 8886, 51001, 51373, 7298, 23518, 51377, 3336, 6169, 143244, 55379, 87178, 63893, 23076, 79080, 6613, 10153, 6780, 55854, 84285, 10535, 23450, 5036, 7884, 1615, 64928, 4830, 1984, 7341, 4691, 4839, 26986, 6182, 84294, 6184, 51491, 7514, 51203, 22919, 8106, 55110, 54888, 6950, 5610, 9221, 51692, 55922, 92140, 28998, 54931, 29080, 25804, 3320, 7334, 1994, 29088,…	551	1373	8431	1.97256	1.53213e-18	1.53213e-18	2.43989e-18
GOTERM_CC_FAT	GO:0005694~chromosome	115	18.0534	2.03318e-20	2146, 3148, 3149, 8886, 84733, 332, 10403, 1104, 54108, 51377, 54908, 79682, 10615, 29128, 2956, 23076, 7283, 79892, 9918, 9735, 79980, 4605, 11004, 7341, 55055, 8208, 10728, 11335, 55723, 11130, 81611, 7514, 23397, 113130, 51203, 6950, 348235, 25909, 58516, 5347, 83695, 2177, 51514, 4173, 7112, 4175, 7528, 699, 4436, 1063, 1062, 3014, 3015, 4171, 10128, 83540, 891, 151246, 10189, 84916, 988, 186…	602	666	8510	2.44094	1.54115e-17	7.70574e-18	3.09882e-17
GOTERM_BP_FAT	GO:0051276~chromosome organization	125	19.6232	7.33551e-20	2146, 3148, 3149, 84733, 29127, 332, 10403, 29028, 54108, 54908, 10694, 79682, 10615, 6418, 29128, 2956, 54892, 79892, 9918, 9735, 79980, 11004, 80218, 55055, 8208, 9055, 10728, 11335, 55723, 11130, 81611, 7514, 5757, 23397, 113130, 51203, 348654, 22919, 6950, 348235, 55165, 25909, 23198, 7334, 5347, 2177, 9631, 4173, 4175, 7528, 3837, 699, 4436, 3833, 1063, 1062, 3014, 3015, 4171, 9232, 908, 835…	598	830	9126	2.29832	3.38167e-16	2.81806e-17	1.38406e-16
GOTERM_BP_FAT	GO:0044772~mitotic cell cycle phase transition	83	13.0298	8.9615e-20	2146, 84930, 8883, 1869, 5682, 7298, 332, 6873, 10403, 1104, 9861, 22974, 5685, 5684, 9700, 983, 10926, 9833, 27338, 701, 9793, 81620, 7283, 5707, 5691, 5690, 5692, 5695, 5701, 9735, 5688, 8453, 5500, 4751, 9787, 5591, 4085, 55215, 10460, 5717, 5718, 11073, 55159, 113130, 128239, 6241, 348654, 22919, 5713, 5716, 6790, 23198, 3320, 5347, 5111, 7272, 84515, 4173, 4175, 11065, 890, 699, 4869, 1017, …	598	427	9126	2.9664	4.13125e-16	3.17789e-17	1.69084e-16
GOTERM_BP_FAT	GO:0006259~DNA metabolic process	111	17.4254	1.16933e-19	2146, 5437, 3148, 3149, 5439, 7298, 54108, 51377, 10694, 10926, 6418, 5440, 29128, 2956, 6613, 116028, 81620, 10535, 79892, 7884, 4830, 7341, 8208, 10728, 29980, 9156, 55215, 113130, 9768, 348654, 6950, 23198, 7334, 7335, 7336, 2175, 29089, 83695, 2177, 84515, 51514, 4173, 4175, 7528, 3837, 3836, 3838, 4436, 10213, 2305, 2778, 1063, 3014, 4171, 9232, 3329, 908, 27101, 990, 5433, 10189, 27000, 791…	598	692	9126	2.44791	5.3906e-16	3.85043e-17	2.20627e-16
GOTERM_BP_FAT	GO:0000070~mitotic sister chromatid segregation	41	6.43642	2.14324e-19	10460, 11130, 64151, 29127, 23397, 113130, 51203, 10403, 348654, 24137, 54908, 9700, 55165, 90417, 9126, 10615, 9493, 5347, 5885, 701, 7272, 55143, 3837, 11065, 699, 23212, 3833, 1063, 1062, 9918, 79980, 11004, 80218, 990, 4751, 891, 9787, 81929, 9055, 4085, 10051	598	116	9126	5.39393	9.88034e-16	6.58689e-17	4.04384e-16
GOTERM_BP_FAT	GO:0044770~cell cycle phase transition	85	13.3438	2.63049e-19	2146, 988, 84930, 8883, 1869, 5682, 7298, 332, 6873, 10403, 1104, 9861, 22974, 5685, 5684, 9700, 983, 10926, 9833, 27338, 701, 9793, 81620, 7283, 5707, 5691, 5690, 5692, 5695, 5701, 9735, 5688, 8453, 5500, 4751, 9787, 5591, 4085, 55215, 10460, 5717, 5718, 81610, 11073, 55159, 113130, 128239, 6241, 348654, 22919, 5713, 5716, 6790, 23198, 3320, 5347, 5111, 7272, 84515, 4173, 4175, 11065, 890, 699, …	598	452	9126	2.86985	1.21266e-15	7.57911e-17	4.96318e-16
GOTERM_MF_FAT	GO:0044822~poly(A) RNA binding	142	22.292	5.58104e-18	51575, 3148, 54517, 7295, 3149, 8886, 7298, 23518, 51377, 3336, 55379, 87178, 63893, 23076, 79080, 6613, 10153, 6780, 55854, 5036, 7884, 1615, 64928, 4830, 1984, 7341, 4691, 4839, 26986, 84294, 6184, 51491, 51203, 8106, 55110, 22919, 6950, 54888, 9221, 5610, 55922, 92140, 28998, 54931, 29080, 25804, 7334, 3320, 1994, 29088, 8565, 3837, 10885, 3838, 10212, 57819, 10492, 51388, 51118, 3326, 5052, 3…	551	1069	8431	2.03254	5.53081e-15	2.76541e-15	8.80772e-15
GOTERM_BP_FAT	GO:0007062~sister chromatid cohesion	35	5.49451	2.08503e-17	11130, 7514, 113130, 332, 10403, 22919, 54908, 9700, 348235, 79682, 25909, 9126, 55839, 5347, 5885, 701, 9793, 55143, 3619, 699, 79892, 1063, 1062, 57122, 79980, 9735, 11004, 80218, 2237, 83540, 991, 55055, 151246, 81929, 4085	598	94	9126	5.68224	9.61198e-14	5.65411e-15	3.934e-14
GOTERM_CC_FAT	GO:0044427~chromosomal part	98	15.3846	9.75211e-17	2146, 988, 1869, 3148, 64151, 84733, 10951, 332, 10403, 1104, 54108, 51377, 54908, 983, 80145, 79682, 10615, 5984, 29128, 2956, 5885, 701, 23076, 86, 9793, 3619, 5983, 79892, 5982, 23160, 9918, 57122, 79980, 9735, 4605, 11004, 1656, 4751, 5500, 7341, 55055, 5591, 8208, 6741, 3646, 10728, 4085, 11335, 10051, 55723, 11130, 81611, 7514, 55159, 23397, 113130, 51659, 6950, 6790, 348235, 25909, 90417, …	602	579	8510	2.39266	8.41549e-14	2.80886e-14	1.66533e-13
GOTERM_CC_FAT	GO:0005654~nucleoplasm	260	40.8163	1.82841e-16	51575, 29127, 6873, 332, 29028, 9861, 10204, 10615, 79084, 2956, 11321, 6613, 10713, 116028, 55759, 84285, 54892, 7884, 4605, 10476, 7341, 8208, 10728, 55656, 55215, 55723, 55726, 1434, 51497, 5757, 4775, 51193, 205564, 348654, 8106, 54888, 3840, 55922, 51692, 92140, 25909, 7334, 1994, 5347, 7336, 1460, 4234, 10885, 3837, 3836, 3838, 10212, 10213, 2305, 10492, 1063, 56902, 9188, 988, 27161, 10248…	602	2383	8510	1.54235	1.6831e-13	4.20775e-14	3.33067e-13
GOTERM_CC_FAT	GO:0098687~chromosomal region	58	9.10518	6.17025e-16	10951, 332, 10403, 54908, 983, 79682, 80145, 10615, 701, 5885, 9793, 3619, 23160, 9918, 57122, 9735, 79980, 11004, 5500, 4751, 55055, 5591, 10728, 4085, 6741, 11335, 11130, 7514, 113130, 6790, 348235, 25909, 90417, 9126, 55839, 5347, 55355, 5111, 7272, 4173, 55143, 4175, 699, 79677, 1017, 4436, 1063, 84661, 3014, 1062, 4171, 2237, 83540, 4288, 151246, 891, 10189, 81929	602	250	8510	3.2796	5.04929e-13	1.0103e-13	1.0103e-12
GOTERM_CC_FAT	GO:0000779~condensed chromosome, centromeric region	32	5.02355	1.79646e-15	11130, 332, 10403, 54908, 6790, 348235, 79682, 25909, 90417, 10615, 55839, 5347, 55355, 701, 9793, 3619, 699, 1063, 1062, 9918, 57122, 79980, 9735, 11004, 83540, 4751, 55055, 891, 151246, 81929, 4085, 11335	602	83	8510	5.45011	1.34648e-12	2.24376e-13	2.70894e-12
GOTERM_BP_FAT	GO:0010564~regulation of cell cycle process	77	12.0879	2.54421e-15	2146, 988, 8883, 1869, 29127, 5682, 332, 10403, 1104, 9861, 22974, 5685, 5684, 9700, 983, 6491, 10615, 9493, 701, 5885, 26973, 1894, 81620, 5707, 5691, 5690, 5692, 5695, 5701, 9735, 5688, 9585, 4751, 9787, 5591, 4085, 55215, 5717, 10460, 5718, 126731, 81610, 11073, 7514, 55159, 113130, 51203, 348654, 5713, 5716, 6790, 90417, 23198, 9126, 5347, 83695, 5111, 7272, 11065, 890, 699, 4869, 4436, 1017,…	598	444	9126	2.64659	1.17717e-11	6.54032e-13	4.81837e-12
GOTERM_CC_FAT	GO:1990904~ribonucleoprotein complex	104	16.3265	1.02174e-14	51373, 55239, 6169, 23076, 10713, 79080, 6780, 84946, 55759, 6009, 23450, 10907, 5036, 79897, 7884, 7411, 64928, 7341, 4691, 10728, 26986, 9801, 6182, 84294, 7514, 8106, 55110, 54888, 5610, 51692, 28998, 25804, 2597, 1994, 29088, 10885, 10212, 57819, 51182, 10492, 51388, 55173, 51118, 51602, 10128, 22913, 10285, 84319, 203068, 5433, 10189, 988, 27161, 10248, 11222, 5682, 219988, 5685, 28977, 9790…	602	675	8510	2.17802	7.74225e-12	1.106e-12	1.55653e-11
GOTERM_CC_FAT	GO:0000775~chromosome, centromeric region	41	6.43642	1.25733e-14	11130, 7514, 10951, 113130, 332, 10403, 54908, 6790, 348235, 79682, 25909, 90417, 9126, 10615, 55839, 5347, 55355, 5885, 701, 7272, 9793, 55143, 3619, 699, 23160, 1063, 1062, 9918, 57122, 9735, 79980, 11004, 83540, 4288, 4751, 55055, 891, 151246, 81929, 4085, 11335	602	143	8510	4.05304	9.5095e-12	1.18872e-12	1.9118e-11
GOTERM_CC_FAT	GO:0030529~intracellular ribonucleoprotein complex	103	16.1695	2.45417e-14	51373, 55239, 6169, 23076, 10713, 79080, 6780, 84946, 6009, 55759, 23450, 10907, 5036, 79897, 7884, 7411, 64928, 7341, 4691, 10728, 26986, 9801, 6182, 84294, 7514, 8106, 55110, 54888, 5610, 51692, 28998, 25804, 2597, 29088, 10885, 10212, 57819, 51182, 10492, 51388, 55173, 51118, 51602, 10128, 22913, 10285, 84319, 203068, 5433, 10189, 988, 27161, 10248, 11222, 5682, 219988, 5685, 28977, 9790, 8260…	602	674	8510	2.16028	1.85982e-11	2.06646e-12	3.73923e-11
GOTERM_CC_FAT	GO:0000777~condensed chromosome kinetochore	29	4.55259	9.33171e-14	11130, 332, 10403, 54908, 348235, 79682, 25909, 90417, 10615, 55839, 5347, 55355, 701, 9793, 3619, 699, 1063, 1062, 57122, 79980, 9735, 11004, 83540, 4751, 55055, 891, 151246, 81929, 4085	602	77	8510	5.32403	7.07743e-11	7.07745e-12	1.42308e-10
GOTERM_BP_FAT	GO:0031145~anaphase-promoting complex-dependent catabolic process	27	4.23862	2.20401e-13	5717, 5718, 5682, 9861, 5713, 5685, 5684, 5716, 6790, 983, 23198, 27338, 5347, 701, 11065, 5707, 5691, 10213, 5690, 5692, 5695, 5701, 9232, 5688, 991, 891, 4085	598	73	9126	5.64443	1.01595e-09	5.3471e-11	4.15812e-10
GOTERM_BP_FAT	GO:0007346~regulation of mitotic cell cycle	67	10.5181	5.24518e-13	2146, 1869, 8883, 5682, 332, 10403, 1104, 9861, 22974, 5685, 5684, 9700, 983, 701, 8872, 5707, 5691, 5690, 5692, 5695, 5701, 9735, 5688, 9585, 4751, 55055, 9787, 5591, 4085, 55215, 5717, 10460, 5718, 126731, 11130, 55726, 11073, 55159, 113130, 51203, 348654, 5713, 5716, 6790, 23198, 5347, 5111, 7272, 890, 11065, 699, 4869, 1017, 4436, 3832, 10213, 7153, 1063, 1062, 54443, 5902, 4288, 990, 991, 89…	598	393	9126	2.60173	2.4178e-09	1.2089e-10	9.89564e-10
GOTERM_CC_FAT	GO:0005819~spindle	52	8.16327	6.58629e-13	79184, 29899, 29127, 10951, 332, 22974, 24137, 54908, 9700, 983, 10615, 9493, 701, 9793, 259266, 1894, 3619, 7283, 55856, 7443, 9735, 79980, 9585, 4751, 9787, 9055, 4085, 11335, 10460, 126731, 81610, 11073, 51203, 22919, 54888, 6790, 348235, 90417, 9126, 5347, 7272, 10112, 55143, 4869, 3833, 3832, 1063, 1062, 26586, 990, 991, 891	602	242	8510	3.03753	4.99207e-10	4.53825e-11	1.00376e-09
GOTERM_BP_FAT	GO:1904666~regulation of ubiquitin protein ligase activity	27	4.23862	9.30016e-13	5717, 5718, 84930, 5682, 9861, 5713, 5685, 5684, 5716, 983, 23198, 27338, 5347, 701, 11065, 5707, 1017, 5691, 10213, 5690, 5692, 5695, 5701, 5688, 991, 891, 4085	598	77	9126	5.35121	4.28746e-09	2.04165e-10	1.75477e-09
GOTERM_BP_FAT	GO:0051726~regulation of cell cycle	99	15.5416	1.03142e-12	2146, 84930, 8883, 29127, 332, 10403, 1104, 9861, 22974, 6491, 87178, 10615, 26973, 1894, 8872, 81620, 6009, 5036, 9735, 4605, 55055, 55215, 126731, 81610, 55726, 11130, 7514, 113130, 51203, 9768, 348654, 23198, 5347, 83695, 51514, 890, 699, 4436, 3832, 10213, 2305, 1063, 1062, 990, 991, 891, 988, 1869, 5682, 5685, 5684, 983, 9700, 9493, 701, 5885, 259266, 63979, 5707, 5691, 5690, 5692, 5695, 570…	598	725	9126	2.0839	4.75474e-09	2.16125e-10	1.94603e-09
GOTERM_CC_FAT	GO:0000776~kinetochore	32	5.02355	1.14309e-12	11130, 7514, 332, 10403, 54908, 348235, 79682, 25909, 90417, 10615, 55839, 5347, 55355, 701, 7272, 9793, 3619, 699, 23160, 1063, 1062, 57122, 79980, 9735, 11004, 83540, 4751, 55055, 891, 151246, 81929, 4085	602	102	8510	4.43489	8.66459e-10	7.22049e-11	1.74221e-09
GOTERM_BP_FAT	GO:0051983~regulation of chromosome segregation	26	4.08163	1.24894e-12	10460, 29127, 113130, 348654, 10403, 9700, 90417, 10615, 5347, 5885, 701, 7272, 1894, 11065, 699, 79677, 1063, 1062, 11004, 2237, 990, 4288, 4751, 9787, 891, 4085	598	72	9126	5.51087	5.75738e-09	2.50321e-10	2.35639e-09
GOTERM_BP_FAT	GO:0006281~DNA repair	65	10.2041	2.20887e-12	79184, 5437, 988, 3148, 5439, 51377, 983, 1054, 9100, 5984, 29128, 5440, 2956, 5885, 6613, 5886, 86, 116028, 7398, 63979, 10535, 22944, 5983, 5982, 7979, 7341, 5591, 8208, 9156, 55215, 9319, 11073, 55159, 113130, 348654, 9768, 51659, 23198, 7334, 9126, 7335, 7336, 2175, 29089, 83695, 5111, 2177, 7874, 84515, 51514, 7528, 79677, 4869, 4436, 1017, 10213, 2305, 8607, 3014, 6996, 10987, 9232, 253714,…	598	386	9126	2.56984	1.0183e-08	4.24293e-10	4.16772e-09
GOTERM_BP_FAT	GO:1904668~positive regulation of ubiquitin protein ligase activity	26	4.08163	3.56904e-12	5717, 5718, 84930, 5682, 9861, 5713, 5685, 5684, 5716, 983, 23198, 27338, 5347, 701, 11065, 5707, 5691, 10213, 5690, 5692, 5695, 5701, 5688, 991, 891, 4085	598	75	9126	5.29043	1.64532e-08	6.5813e-10	6.73401e-09
GOTERM_BP_FAT	GO:0006403~RNA localization	41	6.43642	4.58729e-12	7514, 26019, 8106, 55110, 57510, 56943, 6950, 55164, 10204, 10694, 51692, 80145, 25909, 143244, 84248, 87178, 9793, 9631, 7528, 10212, 1736, 8607, 22948, 7979, 5901, 57122, 23165, 5902, 51602, 10576, 7884, 10128, 908, 1984, 9688, 29074, 5433, 10189, 81929, 11260, 6426	598	181	9126	3.45688	2.11476e-08	8.13369e-10	8.65532e-09
GOTERM_MF_FAT	GO:1901363~heterocyclic compound binding	322	50.5495	6.26475e-12	51575, 5230, 8886, 51373, 6873, 29028, 54108, 23518, 51377, 55379, 79084, 29128, 2956, 11321, 79080, 6613, 116028, 6780, 5747, 205, 55854, 84285, 7879, 1717, 7884, 4605, 10097, 10096, 1984, 7341, 1716, 55215, 84294, 51491, 4775, 51193, 348654, 55110, 8106, 22919, 54888, 5610, 55922, 51692, 92140, 25909, 7334, 221079, 2597, 1994, 5347, 55526, 84790, 4234, 7184, 10885, 55872, 3837, 58477, 3735, 383…	551	3739	8431	1.31773	6.20838e-09	2.06946e-09	9.88675e-09
GOTERM_BP_FAT	GO:0051321~meiotic cell cycle	31	4.86656	1.0902e-11	9319, 84930, 54888, 9700, 6790, 9126, 5347, 2956, 2175, 5885, 2177, 7272, 259266, 7283, 1017, 4436, 7153, 3014, 9918, 79980, 9232, 734, 10097, 10096, 4288, 4751, 991, 151246, 1164, 9156, 10051	598	111	9126	4.26204	5.0258e-08	1.86141e-09	2.05697e-08
GOTERM_BP_FAT	GO:0051443~positive regulation of ubiquitin-protein transferase activity	28	4.3956	1.09424e-11	5717, 5718, 84930, 5682, 9861, 5713, 5685, 5684, 5716, 983, 23198, 7334, 27338, 54165, 5347, 701, 11065, 5707, 5691, 10213, 5690, 5692, 5695, 5701, 5688, 991, 891, 4085	598	91	9126	4.69565	5.04448e-08	1.8016e-09	2.06461e-08
GOTERM_MF_FAT	GO:0097159~organic cyclic compound binding	322	50.5495	1.76562e-11	51575, 5230, 8886, 51373, 6873, 29028, 54108, 23518, 51377, 55379, 79084, 29128, 2956, 11321, 79080, 6613, 116028, 6780, 5747, 205, 55854, 84285, 7879, 1717, 7884, 4605, 10097, 10096, 1984, 7341, 1716, 55215, 84294, 51491, 4775, 51193, 348654, 55110, 8106, 22919, 54888, 5610, 55922, 51692, 92140, 25909, 7334, 221079, 2597, 1994, 5347, 55526, 84790, 4234, 7184, 10885, 55872, 3837, 58477, 3735, 383…	551	3765	8431	1.30863	1.74973e-08	4.37433e-09	2.78642e-08
GOTERM_BP_FAT	GO:0051439~regulation of ubiquitin-protein ligase activity involved in mitotic cell cycle	24	3.76766	1.87509e-11	5717, 5718, 11065, 5707, 5682, 5691, 1017, 10213, 5690, 9861, 5692, 5713, 5695, 5685, 5701, 5684, 5716, 983, 5688, 991, 5347, 891, 701, 4085	598	68	9126	5.38619	8.64416e-08	2.98074e-09	3.53789e-08
GOTERM_BP_FAT	GO:1901987~regulation of cell cycle phase transition	51	8.00628	2.19656e-11	2146, 988, 1869, 8883, 5682, 332, 10403, 9861, 5685, 5684, 983, 9700, 701, 5707, 5691, 5690, 5692, 5695, 5701, 9735, 5688, 9787, 5591, 4085, 5717, 55215, 5718, 81610, 11073, 55159, 113130, 348654, 5713, 5716, 6790, 23198, 5347, 7272, 5111, 890, 11065, 699, 4869, 1017, 10213, 1063, 1062, 54443, 990, 991, 891	598	275	9126	2.8302	1.01262e-07	3.37539e-09	4.14445e-08
GOTERM_BP_FAT	GO:1901990~regulation of mitotic cell cycle phase transition	49	7.69231	2.79876e-11	2146, 8883, 1869, 5682, 332, 10403, 9861, 5685, 5684, 983, 9700, 701, 5707, 5691, 5690, 5692, 5695, 5701, 9735, 5688, 9787, 5591, 4085, 5717, 55215, 5718, 11073, 55159, 113130, 348654, 5713, 5716, 6790, 23198, 5347, 7272, 5111, 11065, 890, 699, 4869, 1017, 10213, 1063, 1062, 54443, 990, 991, 891	598	259	9126	2.88719	1.29022e-07	4.16201e-09	5.28065e-08
GOTERM_BP_FAT	GO:0051437~positive regulation of ubiquitin-protein ligase activity involved in regulation of mitotic cell cycle transition	24	3.76766	5.14047e-11	5717, 5718, 11065, 5707, 5682, 5691, 10213, 5690, 9861, 5692, 5713, 5695, 5685, 5701, 5684, 5716, 983, 5688, 23198, 991, 5347, 891, 701, 4085	598	71	9126	5.1586	2.36975e-07	7.40548e-09	9.69897e-08
GOTERM_BP_FAT	GO:0051438~regulation of ubiquitin-protein transferase activity	29	4.55259	5.94235e-11	5717, 5718, 84930, 5682, 9861, 5713, 5685, 5684, 5716, 983, 23198, 7334, 27338, 54165, 5347, 701, 11065, 5707, 1017, 5691, 10213, 5690, 5692, 5695, 5701, 5688, 991, 891, 4085	598	104	9126	4.25543	2.73942e-07	8.30128e-09	1.12119e-07
GOTERM_BP_FAT	GO:0051436~negative regulation of ubiquitin-protein ligase activity involved in mitotic cell cycle	23	3.61068	1.00565e-10	5717, 5718, 11065, 5707, 5682, 1017, 5691, 10213, 5690, 9861, 5692, 5713, 5695, 5685, 5701, 5684, 5716, 983, 5688, 991, 891, 701, 4085	598	67	9126	5.23881	4.63606e-07	1.36355e-08	1.89745e-07
GOTERM_BP_FAT	GO:1904667~negative regulation of ubiquitin protein ligase activity	23	3.61068	1.39694e-10	5717, 5718, 11065, 5707, 5682, 1017, 5691, 10213, 5690, 9861, 5692, 5713, 5695, 5685, 5701, 5684, 5716, 983, 5688, 991, 891, 701, 4085	598	68	9126	5.16176	6.43988e-07	1.83997e-08	2.63573e-07
GOTERM_BP_FAT	GO:2000060~positive regulation of protein ubiquitination involved in ubiquitin-dependent protein catabolic process	25	3.92465	2.13608e-10	5717, 5718, 5747, 11065, 5707, 5682, 5691, 10213, 5690, 9861, 5692, 5713, 5695, 5685, 5701, 5684, 5716, 983, 5688, 23198, 991, 5347, 891, 701, 4085	598	82	9126	4.6527	9.84732e-07	2.73537e-08	4.03033e-07
GOTERM_BP_FAT	GO:0051783~regulation of nuclear division	30	4.70958	2.96303e-10	10460, 126731, 113130, 51203, 332, 10403, 348654, 1104, 9700, 6790, 5347, 701, 7272, 11065, 699, 4436, 3832, 1063, 1062, 5902, 54443, 9735, 9585, 4288, 990, 4751, 991, 9787, 891, 4085	598	118	9126	3.87988	1.36595e-06	3.69177e-08	5.5906e-07
GOTERM_BP_FAT	GO:1903046~meiotic cell cycle process	26	4.08163	3.09487e-10	9319, 84930, 54888, 9700, 6790, 9126, 5347, 2175, 2956, 5885, 7272, 2177, 259266, 7283, 4436, 1017, 7153, 9918, 79980, 9232, 10097, 10096, 4288, 151246, 1164, 10051	598	90	9126	4.4087	1.42673e-06	3.75457e-08	5.83936e-07
GOTERM_BP_FAT	GO:2000058~regulation of protein ubiquitination involved in ubiquitin-dependent protein catabolic process	26	4.08163	3.09487e-10	5717, 5718, 5682, 9861, 5713, 5685, 5684, 5716, 983, 23198, 5347, 701, 5747, 11065, 79031, 5707, 5691, 10213, 5690, 5692, 5695, 5701, 5688, 991, 891, 4085	598	90	9126	4.4087	1.42673e-06	3.75457e-08	5.83936e-07
GOTERM_BP_FAT	GO:0006260~DNA replication	42	6.59341	3.34633e-10	11073, 9768, 6241, 51659, 983, 10926, 11177, 9126, 5984, 6418, 83695, 5111, 84515, 116028, 51514, 4173, 4175, 81620, 4869, 7150, 10535, 22944, 9837, 1017, 7153, 5983, 79892, 5982, 4171, 23560, 7884, 9134, 2237, 253714, 27101, 990, 10189, 6742, 8208, 29980, 9156, 27000	598	215	9126	2.98119	1.54265e-06	3.95553e-08	6.3138e-07
GOTERM_BP_FAT	GO:0007052~mitotic spindle organization	16	2.51177	4.97912e-10	55726, 29899, 29127, 3832, 10403, 1104, 24137, 5901, 6790, 6491, 9126, 3925, 9493, 891, 7272, 9055	598	33	9126	7.39921	2.29537e-06	5.73843e-08	9.39454e-07
GOTERM_CC_FAT	GO:0000228~nuclear chromosome	61	9.57614	6.14406e-10	2146, 988, 1869, 3148, 10951, 332, 10403, 1104, 54108, 51377, 983, 80145, 29128, 2956, 701, 5885, 86, 63979, 3619, 7283, 23212, 79892, 9918, 79980, 5500, 4751, 5591, 8208, 6741, 11335, 55723, 81611, 11073, 113130, 51659, 6950, 6790, 9126, 58516, 5347, 84365, 5111, 8896, 4173, 4175, 7528, 699, 7150, 9837, 4436, 7153, 8607, 3014, 3015, 4171, 10128, 2237, 253714, 3066, 891, 10189	602	370	8510	2.33056	4.65719e-07	3.58246e-08	9.36431e-07
GOTERM_BP_FAT	GO:0007088~regulation of mitotic nuclear division	28	4.3956	6.49031e-10	10460, 126731, 113130, 51203, 332, 10403, 348654, 1104, 9700, 6790, 5347, 701, 7272, 11065, 699, 3832, 1063, 1062, 5902, 54443, 9735, 9585, 990, 4288, 4751, 9787, 891, 4085	598	107	9126	3.9935	2.99203e-06	7.29764e-08	1.22458e-06
GOTERM_BP_FAT	GO:0000075~cell cycle checkpoint	38	5.96546	7.29408e-10	55215, 79184, 11130, 988, 1869, 8883, 11073, 55159, 332, 10403, 348654, 54888, 54908, 983, 6790, 5347, 701, 83695, 5111, 7272, 51514, 81620, 890, 699, 4869, 1017, 4436, 7153, 1063, 3014, 9735, 9134, 990, 55055, 891, 261726, 5591, 4085	598	186	9126	3.11781	3.36257e-06	8.00613e-08	1.37624e-06
GOTERM_BP_FAT	GO:0000226~microtubule cytoskeleton organization	50	7.84929	8.26162e-10	29899, 29127, 332, 10403, 1104, 24137, 22974, 54908, 983, 9700, 6491, 10615, 9493, 3925, 9793, 26973, 259266, 63979, 8409, 5747, 7283, 23160, 10376, 4605, 11004, 4751, 9055, 10460, 126731, 7514, 51203, 348654, 9768, 22919, 6790, 348235, 90417, 2597, 5347, 7272, 10112, 3837, 4869, 1017, 3833, 3832, 27436, 26586, 5902, 203068	598	294	9126	2.59539	3.8086e-06	8.85722e-08	1.55879e-06
GOTERM_CC_FAT	GO:0000922~spindle pole	29	4.55259	8.9192e-10	10460, 79184, 81610, 29899, 11073, 22974, 54908, 6790, 90417, 9126, 10615, 5347, 9793, 259266, 4869, 7283, 3832, 1063, 26586, 79980, 9735, 9585, 990, 4751, 991, 9787, 891, 9055, 4085	602	108	8510	3.79583	6.76075e-07	4.82911e-08	1.3594e-06
KEGG_PATHWAY	hsa04110:Cell cycle	29	4.55259	1.04013e-09	10971, 1869, 9700, 983, 10926, 9126, 5347, 5885, 701, 5111, 7272, 4173, 4175, 890, 699, 1017, 1871, 4171, 9232, 9134, 9133, 990, 991, 7534, 3066, 891, 7532, 5591, 4085	312	101	3995	3.67654	2.03865e-07	2.03865e-07	1.29938e-06
GOTERM_BP_FAT	GO:0051444~negative regulation of ubiquitin-protein transferase activity	23	3.61068	1.16376e-09	5717, 5718, 11065, 5707, 5682, 1017, 5691, 10213, 5690, 9861, 5692, 5713, 5695, 5685, 5701, 5684, 5716, 983, 5688, 991, 891, 701, 4085	598	75	9126	4.68	5.36494e-06	1.21931e-07	2.19578e-06
GOTERM_CC_FAT	GO:0031967~organelle envelope	111	17.4254	1.48907e-09	29796, 51001, 7298, 51373, 1104, 131474, 51629, 10204, 9551, 143244, 23306, 55379, 87178, 60386, 1329, 51012, 63933, 1717, 79691, 64928, 54927, 9868, 4830, 10476, 1984, 7341, 4694, 10165, 23788, 11335, 9801, 6182, 54539, 1434, 81034, 7514, 7416, 7417, 3840, 92140, 28998, 25909, 2597, 29088, 517, 51514, 514, 9631, 7112, 401505, 9377, 1468, 3837, 10885, 3836, 3838, 10682, 1063, 55173, 3329, 54205, …	602	893	8510	1.75713	1.12872e-06	7.52478e-08	2.26953e-06
GOTERM_BP_FAT	GO:0007017~microtubule-based process	62	9.73312	1.61544e-09	29899, 29127, 332, 10403, 1104, 24137, 22974, 54908, 9700, 983, 6491, 10615, 9493, 3925, 55605, 9793, 26973, 259266, 63979, 8409, 5747, 7283, 23160, 10376, 7411, 4605, 11004, 4976, 10097, 9585, 10096, 4751, 9787, 9055, 10460, 126731, 7514, 51203, 348654, 9768, 22919, 6790, 348235, 90417, 2597, 5347, 84790, 83658, 7272, 10112, 3837, 4869, 5194, 3833, 1017, 3832, 27436, 1062, 26586, 5902, 10128, 20…	598	418	9126	2.26357	7.44717e-06	1.65493e-07	3.048e-06
GOTERM_CC_FAT	GO:0031975~envelope	111	17.4254	1.69049e-09	29796, 51001, 7298, 51373, 1104, 131474, 51629, 10204, 9551, 143244, 23306, 55379, 87178, 60386, 1329, 51012, 63933, 1717, 79691, 64928, 54927, 9868, 4830, 10476, 1984, 7341, 4694, 10165, 23788, 11335, 9801, 6182, 54539, 1434, 81034, 7514, 7416, 7417, 3840, 92140, 28998, 25909, 2597, 29088, 517, 51514, 514, 9631, 7112, 401505, 9377, 1468, 3837, 10885, 3836, 3838, 10682, 1063, 55173, 3329, 54205, …	602	895	8510	1.75321	1.28139e-06	8.00869e-08	2.57652e-06
GOTERM_BP_FAT	GO:0031398~positive regulation of protein ubiquitination	33	5.18053	2.03895e-09	55215, 5717, 5718, 84930, 5682, 8767, 9861, 5713, 5685, 5684, 5716, 983, 23198, 51256, 27338, 7334, 54165, 5347, 701, 5747, 11065, 5707, 5691, 10213, 5690, 5692, 5695, 5701, 5688, 79139, 991, 891, 4085	598	151	9126	3.33516	9.39951e-06	2.04338e-07	3.84706e-06
GOTERM_CC_FAT	GO:0000794~condensed nuclear chromosome	19	2.98273	2.16692e-09	3619, 11073, 699, 7283, 23212, 10403, 1104, 3014, 9918, 6790, 79980, 10128, 9126, 4751, 5347, 84365, 5885, 891, 701	602	49	8510	5.48139	1.64252e-06	9.66191e-08	3.30266e-06
GOTERM_CC_FAT	GO:0015630~microtubule cytoskeleton	100	15.6986	4.73803e-09	84930, 29127, 332, 22974, 10694, 54908, 6491, 79682, 10615, 3925, 1894, 6780, 5747, 8409, 10808, 7283, 4190, 55856, 9735, 79980, 11004, 4830, 9055, 11335, 126731, 81610, 51203, 348654, 22919, 6950, 54888, 348235, 55165, 2597, 5347, 286827, 84790, 10112, 51514, 58477, 3735, 7525, 3833, 3832, 1063, 1062, 4171, 10128, 908, 990, 991, 203068, 891, 79184, 29899, 64151, 10951, 5682, 24137, 89891, 983, 9…	602	790	8510	1.78939	3.59142e-06	1.99524e-07	7.22136e-06
GOTERM_CC_FAT	GO:0000502~proteasome complex	21	3.2967	5.28253e-09	5717, 5718, 5707, 5682, 5691, 10213, 5690, 9861, 5692, 5713, 7979, 51377, 5695, 5685, 5701, 5684, 5716, 5688, 23198, 5886, 84262	602	63	8510	4.71207	4.00415e-06	2.10745e-07	8.05124e-06
GOTERM_BP_FAT	GO:0006521~regulation of cellular amino acid metabolic process	18	2.82575	5.31925e-09	5717, 51582, 5718, 5707, 5682, 5691, 5690, 10213, 9861, 5692, 5695, 5713, 5685, 5701, 5684, 5716, 5688, 23198	598	49	9126	5.60603	2.45214e-05	5.21739e-07	1.00363e-05
GOTERM_BP_FAT	GO:0033238~regulation of cellular amine metabolic process	19	2.98273	7.60362e-09	5717, 51582, 5718, 3251, 5707, 5682, 5691, 5690, 10213, 9861, 5692, 5713, 5695, 5685, 5701, 5684, 5716, 5688, 23198	598	56	9126	5.1778	3.50521e-05	7.30264e-07	1.43464e-05
GOTERM_BP_FAT	GO:0031396~regulation of protein ubiquitination	39	6.12245	8.01741e-09	55215, 5717, 5718, 84930, 5682, 8767, 9861, 5713, 5685, 5684, 5716, 983, 23198, 51256, 27338, 3320, 7334, 54165, 5347, 701, 5747, 3301, 11065, 79031, 5707, 5691, 1017, 5690, 10213, 5692, 5695, 3326, 5701, 23560, 5688, 79139, 991, 891, 4085	598	211	9126	2.82073	3.69596e-05	7.54291e-07	1.51271e-05
GOTERM_MF_FAT	GO:0003676~nucleic acid binding	231	36.2637	8.10134e-09	51575, 8886, 51373, 6873, 54108, 23518, 51377, 55379, 79084, 29128, 2956, 79080, 6613, 116028, 6780, 55854, 84285, 7884, 4605, 1984, 7341, 55215, 84294, 51491, 4775, 51193, 348654, 22919, 8106, 55110, 54888, 5610, 55922, 51692, 92140, 25909, 7334, 1994, 4234, 7184, 10885, 3837, 3735, 3838, 10212, 51388, 10492, 2305, 6897, 22913, 908, 56902, 9188, 988, 27161, 10248, 10247, 11222, 28977, 84172, 86,…	551	2590	8431	1.36471	8.0284e-06	1.60568e-06	1.27851e-05
GOTERM_BP_FAT	GO:0007126~meiotic nuclear division	23	3.61068	9.47869e-09	9319, 84930, 1017, 4436, 7153, 9232, 6790, 79980, 9700, 10097, 9126, 10096, 4288, 5347, 2956, 2175, 5885, 151246, 2177, 7272, 1164, 10051, 259266	598	83	9126	4.22892	4.36958e-05	8.73935e-07	1.78843e-05
GOTERM_BP_FAT	GO:0051303~establishment of chromosome localization	18	2.82575	1.06841e-08	55143, 81610, 3837, 23212, 113130, 332, 3833, 10403, 1063, 1062, 54908, 55165, 11004, 10097, 10096, 9787, 891, 81929	598	51	9126	5.38619	4.92526e-05	9.6576e-07	2.01587e-05
GOTERM_BP_FAT	GO:0006974~cellular response to DNA damage stimulus	78	12.2449	1.09072e-08	79184, 5437, 988, 84930, 1869, 3148, 5439, 51377, 983, 1054, 9100, 5984, 29128, 5440, 2956, 5885, 6613, 5886, 86, 116028, 7398, 63979, 3301, 10535, 22944, 5983, 5982, 7979, 7341, 5591, 8208, 9156, 55215, 9319, 11073, 55159, 113130, 348654, 9768, 51659, 5716, 6790, 23198, 9126, 7334, 7335, 7336, 5347, 2175, 29089, 83695, 5111, 2177, 7874, 84515, 51514, 7528, 890, 79677, 4869, 4436, 10212, 1017, 10…	598	612	9126	1.94501	5.02808e-05	9.66963e-07	2.05795e-05
GOTERM_BP_FAT	GO:0006323~DNA packaging	25	3.92465	1.37865e-08	55723, 6732, 81611, 3148, 64151, 54892, 23397, 4869, 51203, 113130, 7153, 8607, 3014, 9918, 4171, 983, 79682, 8260, 23198, 55839, 6418, 55355, 891, 8208, 10051	598	99	9126	3.85375	6.35536e-05	1.19916e-06	2.60121e-05
GOTERM_BP_FAT	GO:0050000~chromosome localization	18	2.82575	1.49228e-08	55143, 81610, 3837, 23212, 113130, 332, 3833, 10403, 1063, 1062, 54908, 55165, 11004, 10097, 10096, 9787, 891, 81929	598	52	9126	5.28261	6.87917e-05	1.27396e-06	2.81561e-05
GOTERM_CC_FAT	GO:0019866~organelle inner membrane	64	10.0471	2.02205e-08	84300, 29796, 11222, 7298, 51373, 51629, 10204, 9551, 26519, 4001, 28977, 23306, 57380, 3052, 1349, 54148, 60386, 1340, 1329, 509, 63933, 3396, 7381, 64928, 54927, 4976, 57129, 10476, 54968, 29074, 1337, 7388, 4694, 23788, 10165, 11335, 9801, 6182, 54539, 51650, 81034, 56945, 7416, 7417, 4702, 28998, 64960, 29088, 517, 514, 7112, 9377, 1468, 51649, 4715, 55173, 4710, 51642, 3329, 54205, 10128, 13…	602	434	8510	2.0846	1.53271e-05	7.66358e-07	3.08186e-05
KEGG_PATHWAY	hsa03050:Proteasome	17	2.66876	2.14175e-08	5717, 5718, 5707, 5682, 5691, 5690, 10213, 9861, 5692, 7979, 5695, 5713, 5685, 5701, 5684, 5688, 23198	312	41	3995	5.30918	4.19781e-06	2.09891e-06	2.67557e-05
GOTERM_BP_FAT	GO:1903322~positive regulation of protein modification by small protein conjugation or removal	33	5.18053	2.33531e-08	55215, 5717, 5718, 84930, 5682, 8767, 9861, 5713, 5685, 5684, 5716, 983, 23198, 51256, 27338, 7334, 54165, 5347, 701, 5747, 11065, 5707, 5691, 10213, 5690, 5692, 5695, 5701, 5688, 79139, 991, 891, 4085	598	166	9126	3.03379	0.000107652	1.95741e-06	4.40623e-05
GOTERM_CC_FAT	GO:0000940~condensed chromosome outer kinetochore	9	1.41287	2.34591e-08	348235, 699, 5347, 10403, 891, 701, 1063, 1062, 54908	602	10	8510	12.7226	1.77818e-05	8.46761e-07	3.57546e-05
GOTERM_BP_FAT	GO:0050657~nucleic acid transport	31	4.86656	2.68955e-08	7514, 26019, 55110, 57510, 8106, 56943, 10204, 51692, 80145, 143244, 25909, 84248, 87178, 9793, 9631, 10212, 7979, 5901, 57122, 5902, 23165, 7884, 10128, 1984, 9688, 5433, 29074, 10189, 81929, 11260, 6426	598	150	9126	3.15391	0.00012398	2.21407e-06	5.0746e-05
GOTERM_BP_FAT	GO:0050658~RNA transport	31	4.86656	2.68955e-08	7514, 26019, 55110, 57510, 8106, 56943, 10204, 51692, 80145, 143244, 25909, 84248, 87178, 9793, 9631, 10212, 7979, 5901, 57122, 5902, 23165, 7884, 10128, 1984, 9688, 5433, 29074, 10189, 81929, 11260, 6426	598	150	9126	3.15391	0.00012398	2.21407e-06	5.0746e-05
GOTERM_BP_FAT	GO:0006310~DNA recombination	32	5.02355	3.43107e-08	9319, 3148, 3149, 348654, 51659, 51377, 7334, 5984, 2956, 5885, 83695, 5111, 86, 84515, 116028, 63979, 7528, 79677, 22944, 4436, 10213, 7153, 8607, 5983, 5982, 3014, 7979, 3329, 253714, 2237, 5591, 9156	598	160	9126	3.05217	0.00015816	2.77495e-06	6.47369e-05
GOTERM_BP_FAT	GO:0022613~ribonucleoprotein complex biogenesis	60	9.41915	3.70306e-08	27161, 51001, 25926, 55239, 219988, 6169, 9790, 54663, 10199, 79084, 23076, 10713, 79080, 705, 8872, 29889, 55759, 84946, 23212, 55299, 9816, 23160, 96764, 5036, 10907, 6059, 79897, 25879, 1656, 3646, 4839, 84294, 6637, 51491, 7514, 6636, 6633, 55164, 9221, 29080, 25804, 84154, 10885, 4869, 51388, 1736, 8607, 51118, 5901, 23560, 51602, 10557, 55341, 56902, 5433, 6632, 9188, 6631, 84916, 6426	598	432	9126	2.11957	0.000170697	2.94329e-06	6.98689e-05
GOTERM_MF_FAT	GO:0000166~nucleotide binding	158	24.8038	3.88363e-08	84930, 5230, 8886, 7298, 29028, 7296, 22974, 3336, 10694, 488, 27338, 63893, 79084, 29128, 2956, 11321, 26973, 10808, 5747, 205, 6009, 7283, 4190, 7879, 1717, 1615, 11004, 10097, 4830, 10096, 1716, 4691, 26986, 8106, 6950, 7417, 5610, 9221, 221079, 3320, 7334, 1503, 2597, 1994, 5347, 84790, 29089, 10112, 7184, 84515, 4173, 4175, 8565, 55872, 699, 58477, 3735, 7525, 10212, 3833, 4436, 3832, 51182,…	551	1628	8431	1.48501	3.8486e-05	6.41444e-06	6.12895e-05
GOTERM_MF_FAT	GO:1901265~nucleoside phosphate binding	158	24.8038	4.03206e-08	84930, 5230, 8886, 7298, 29028, 7296, 22974, 3336, 10694, 488, 27338, 63893, 79084, 29128, 2956, 11321, 26973, 10808, 5747, 205, 6009, 7283, 4190, 7879, 1717, 1615, 11004, 10097, 4830, 10096, 1716, 4691, 26986, 8106, 6950, 7417, 5610, 9221, 221079, 3320, 7334, 1503, 2597, 1994, 5347, 84790, 29089, 10112, 7184, 84515, 4173, 4175, 8565, 55872, 699, 58477, 3735, 7525, 10212, 3833, 4436, 3832, 51182,…	551	1629	8431	1.4841	3.99569e-05	5.70823e-06	6.3632e-05
GOTERM_BP_FAT	GO:0051236~establishment of RNA localization	31	4.86656	4.31411e-08	7514, 26019, 55110, 57510, 8106, 56943, 10204, 51692, 80145, 143244, 25909, 84248, 87178, 9793, 9631, 10212, 7979, 5901, 57122, 5902, 23165, 7884, 10128, 1984, 9688, 5433, 29074, 10189, 81929, 11260, 6426	598	153	9126	3.09207	0.000198861	3.37085e-06	8.1398e-05
GOTERM_BP_FAT	GO:0034622~cellular macromolecular complex assembly	84	13.1868	5.22722e-08	84300, 29796, 27161, 3148, 51001, 6873, 55239, 219988, 6169, 10959, 9790, 79682, 27338, 79084, 6418, 3925, 3052, 10713, 9793, 8872, 5747, 10059, 7283, 55299, 8624, 7979, 96764, 57122, 5701, 23165, 10907, 10471, 10576, 7381, 7411, 375, 4976, 10097, 1656, 10096, 9688, 54968, 4694, 8208, 3646, 5717, 54539, 55723, 6637, 81611, 6636, 6633, 203547, 22919, 4702, 6950, 7417, 55164, 5716, 25909, 25804, 33…	598	703	9126	1.82349	0.000240946	4.01624e-06	9.86265e-05
GOTERM_MF_FAT	GO:0036094~small molecule binding	165	25.9027	5.72204e-08	84930, 5230, 8886, 7298, 29028, 55239, 7296, 22974, 3336, 10694, 488, 27338, 63893, 79084, 29128, 2956, 11321, 26973, 10808, 5747, 205, 6009, 7283, 4190, 5033, 7879, 1717, 1615, 11004, 10097, 4830, 10096, 1716, 4691, 26986, 8106, 6950, 7417, 5352, 5610, 9221, 221079, 3320, 7334, 2597, 1503, 1994, 5347, 55526, 84790, 29089, 10112, 7184, 84515, 4173, 4175, 8565, 55872, 699, 58477, 3735, 7525, 10212…	551	1730	8431	1.45937	5.67038e-05	7.08815e-06	9.03023e-05
GOTERM_BP_FAT	GO:1902589~single-organism organelle organization	120	18.8383	6.61838e-08	29127, 332, 10403, 1104, 22974, 54908, 5534, 6491, 9141, 79682, 87178, 10615, 3925, 26973, 5747, 8409, 7283, 79892, 9918, 7879, 9735, 79980, 4605, 54927, 11004, 10097, 80218, 10096, 55055, 9055, 23788, 126731, 11130, 7514, 23397, 113130, 51203, 9768, 348654, 22919, 348235, 55165, 25909, 3320, 2597, 5347, 286827, 10112, 7184, 3837, 699, 3833, 3832, 1063, 1062, 79135, 83540, 990, 991, 7534, 203068,…	598	1141	9126	1.605	0.000305061	5.00175e-06	0.000124875
GOTERM_CC_FAT	GO:0005730~nucleolus	90	14.1287	7.17549e-08	5437, 51575, 988, 10248, 7705, 3148, 8886, 7298, 25926, 7296, 39, 9790, 54663, 8260, 10199, 84172, 5440, 23076, 79080, 79954, 79005, 705, 9442, 29889, 55759, 55854, 23212, 55299, 9816, 23160, 23450, 96764, 22948, 7443, 5036, 79897, 25879, 1656, 9585, 8453, 7341, 5500, 4751, 4691, 5591, 4839, 84294, 51491, 3608, 7514, 51290, 51203, 4775, 205564, 54888, 55164, 9221, 55922, 92140, 7334, 84365, 5347,…	602	722	8510	1.76213	5.43887e-05	2.47228e-06	0.000109363
GOTERM_BP_FAT	GO:0051169~nuclear transport	54	8.47724	8.0059e-08	7295, 10204, 5534, 983, 80145, 84248, 6418, 11321, 1894, 129138, 84946, 23212, 96764, 7979, 57122, 23165, 6059, 7884, 1984, 9688, 6637, 1434, 81611, 7514, 6636, 26019, 6633, 8106, 57510, 56943, 3840, 51692, 5716, 8815, 3320, 9631, 3837, 3836, 4869, 3838, 10212, 3326, 5052, 5901, 5902, 51602, 10553, 55341, 5433, 6632, 10189, 81929, 11260, 6426	598	378	9126	2.18012	0.000369004	5.95276e-06	0.000151054
GOTERM_BP_FAT	GO:0071166~ribonucleoprotein complex localization	26	4.08163	8.53885e-08	7514, 26019, 8106, 56943, 51692, 80145, 84248, 9631, 84946, 23212, 10212, 96764, 7979, 5901, 57122, 23165, 6059, 7884, 51602, 9688, 1984, 5433, 10189, 81929, 11260, 6426	598	116	9126	3.42054	0.000393564	6.24825e-06	0.00016111
GOTERM_MF_FAT	GO:0001882~nucleoside binding	128	20.0942	8.98862e-08	84930, 5230, 8886, 29028, 22974, 3336, 10694, 488, 27338, 63893, 2956, 11321, 26973, 10808, 5747, 205, 6009, 7283, 7879, 1615, 11004, 10097, 4830, 10096, 1716, 6950, 9221, 5610, 221079, 7334, 3320, 1503, 5347, 29089, 84790, 10112, 7184, 84515, 4173, 4175, 8565, 55872, 699, 58477, 3735, 7525, 10212, 4436, 3833, 3832, 51182, 2778, 3326, 1062, 4171, 3329, 6897, 57403, 908, 990, 27102, 10606, 203068,…	551	1256	8431	1.55937	8.90732e-05	9.89742e-06	0.000141854
GOTERM_BP_FAT	GO:0033045~regulation of sister chromatid segregation	18	2.82575	9.27516e-08	10460, 11065, 699, 113130, 10403, 348654, 1063, 1062, 9700, 2237, 990, 5347, 5885, 9787, 891, 701, 7272, 4085	598	58	9126	4.73613	0.000427494	6.68099e-06	0.000175002
GOTERM_BP_FAT	GO:0015931~nucleobase-containing compound transport	33	5.18053	9.87779e-08	7514, 26019, 8106, 55110, 57510, 56943, 10204, 51692, 80145, 143244, 25909, 84248, 87178, 9793, 9631, 60386, 10237, 10212, 7979, 5901, 57122, 5902, 23165, 7884, 10128, 1984, 9688, 29074, 5433, 10189, 81929, 11260, 6426	598	176	9126	2.86141	0.000455262	7.00561e-06	0.000186373
GOTERM_BP_FAT	GO:0009123~nucleoside monophosphate metabolic process	39	6.12245	9.96483e-08	84300, 54539, 29796, 5230, 7298, 4702, 9551, 8833, 7167, 2597, 7371, 55526, 1349, 7083, 517, 514, 63979, 9377, 3251, 1340, 205, 1329, 509, 2618, 11164, 4436, 4715, 4710, 54205, 7381, 3939, 10476, 5471, 10606, 1716, 1337, 7388, 4694, 10165	598	231	9126	2.57651	0.000459273	6.96026e-06	0.000188015
GOTERM_BP_FAT	GO:1903320~regulation of protein modification by small protein conjugation or removal	39	6.12245	9.96483e-08	55215, 5717, 5718, 84930, 5682, 8767, 9861, 5713, 5685, 5684, 5716, 983, 23198, 51256, 27338, 3320, 7334, 54165, 5347, 701, 5747, 3301, 11065, 79031, 5707, 5691, 1017, 5690, 10213, 5692, 5695, 3326, 5701, 23560, 5688, 79139, 991, 891, 4085	598	231	9126	2.57651	0.000459273	6.96026e-06	0.000188015
GOTERM_BP_FAT	GO:0031397~negative regulation of protein ubiquitination	26	4.08163	1.02039e-07	5717, 5718, 5682, 9861, 5713, 5685, 5684, 983, 5716, 701, 11065, 3301, 79031, 5707, 1017, 5691, 5690, 10213, 5692, 5695, 5701, 23560, 5688, 991, 891, 4085	598	117	9126	3.3913	0.000470287	7.02084e-06	0.000192525
GOTERM_BP_FAT	GO:0006913~nucleocytoplasmic transport	53	8.32025	1.08036e-07	7295, 10204, 983, 5534, 80145, 84248, 6418, 11321, 1894, 129138, 84946, 23212, 96764, 7979, 57122, 23165, 6059, 7884, 1984, 9688, 6637, 1434, 81611, 7514, 6636, 26019, 6633, 8106, 57510, 56943, 3840, 51692, 5716, 3320, 9631, 3837, 3836, 4869, 3838, 10212, 3326, 5052, 5901, 5902, 51602, 10553, 55341, 5433, 6632, 10189, 81929, 11260, 6426	598	371	9126	2.18012	0.000497921	7.32417e-06	0.00020384
GOTERM_BP_FAT	GO:0006261~DNA-dependent DNA replication	24	3.76766	1.17189e-07	4173, 4175, 81620, 11073, 10535, 1017, 9837, 7153, 5983, 51659, 79892, 5982, 4171, 7884, 9134, 253714, 2237, 9126, 11177, 5984, 990, 10189, 5111, 29980	598	102	9126	3.59079	0.000540095	7.82955e-06	0.00022111
GOTERM_MF_FAT	GO:0032549~ribonucleoside binding	127	19.9372	1.28536e-07	84930, 5230, 8886, 29028, 22974, 3336, 10694, 488, 27338, 63893, 2956, 11321, 26973, 10808, 5747, 205, 6009, 7283, 7879, 1615, 11004, 10097, 4830, 10096, 1716, 6950, 9221, 5610, 221079, 7334, 3320, 1503, 5347, 29089, 84790, 10112, 7184, 84515, 4173, 4175, 8565, 55872, 699, 58477, 3735, 7525, 10212, 4436, 3833, 3832, 51182, 2778, 3326, 1062, 4171, 3329, 6897, 57403, 908, 990, 27102, 10606, 203068,…	551	1251	8431	1.55337	0.000127371	1.27378e-05	0.000202848
GOTERM_CC_FAT	GO:0005743~mitochondrial inner membrane	58	9.10518	1.47177e-07	84300, 29796, 11222, 7298, 51373, 51629, 9551, 26519, 28977, 57380, 3052, 1349, 54148, 60386, 1340, 1329, 509, 63933, 3396, 7381, 64928, 54927, 4976, 57129, 10476, 54968, 29074, 1337, 7388, 4694, 10165, 23788, 6182, 9801, 54539, 51650, 81034, 56945, 7416, 7417, 4702, 28998, 64960, 29088, 517, 514, 9377, 1468, 51649, 4715, 55173, 51642, 4710, 3329, 54205, 134266, 79135, 64951	602	397	8510	2.06524	0.000111554	4.85044e-06	0.000224317
GOTERM_MF_FAT	GO:0035639~purine ribonucleoside triphosphate binding	126	19.7802	1.48147e-07	84930, 5230, 8886, 29028, 22974, 3336, 10694, 488, 27338, 63893, 2956, 11321, 26973, 10808, 5747, 205, 6009, 7283, 7879, 1615, 11004, 10097, 4830, 10096, 1716, 6950, 9221, 5610, 221079, 7334, 3320, 1503, 5347, 29089, 84790, 10112, 7184, 84515, 4173, 4175, 8565, 55872, 699, 58477, 3735, 7525, 10212, 4436, 3833, 3832, 51182, 2778, 3326, 1062, 4171, 3329, 6897, 57403, 908, 990, 27102, 10606, 203068,…	551	1241	8431	1.55355	0.000146803	1.33466e-05	0.000233798
GOTERM_BP_FAT	GO:1903364~positive regulation of cellular protein catabolic process	31	4.86656	1.63853e-07	5717, 84300, 5718, 5682, 9861, 5713, 5685, 5684, 6790, 5716, 983, 23198, 7336, 5347, 701, 6613, 55737, 5747, 11065, 5707, 5691, 10213, 5690, 5692, 5695, 5701, 5688, 7341, 991, 891, 4085	598	162	9126	2.92029	0.000755079	1.07909e-05	0.000309156
GOTERM_BP_FAT	GO:0071103~DNA conformation change	31	4.86656	1.63853e-07	55723, 81611, 3148, 64151, 3149, 23397, 113130, 51203, 51659, 983, 79682, 8260, 23198, 55839, 6418, 55355, 4173, 6732, 4175, 54892, 4869, 7150, 9837, 7153, 8607, 3014, 9918, 4171, 891, 8208, 10051	598	162	9126	2.92029	0.000755079	1.07909e-05	0.000309156
GOTERM_MF_FAT	GO:0017076~purine nucleotide binding	128	20.0942	1.6947e-07	84930, 5230, 8886, 29028, 22974, 3336, 10694, 488, 27338, 63893, 2956, 11321, 26973, 10808, 5747, 205, 6009, 7283, 7879, 1615, 11004, 10097, 4830, 10096, 1716, 6950, 9221, 5610, 221079, 7334, 3320, 1503, 5347, 29089, 84790, 10112, 7184, 84515, 4173, 4175, 8565, 55872, 699, 58477, 3735, 7525, 10212, 4436, 3833, 3832, 51182, 2778, 3326, 1062, 4171, 3329, 6897, 57403, 134266, 908, 990, 27102, 10606,…	551	1270	8431	1.54218	0.000167931	1.39953e-05	0.000267449
GOTERM_MF_FAT	GO:0032550~purine ribonucleoside binding	126	19.7802	2.05482e-07	84930, 5230, 8886, 29028, 22974, 3336, 10694, 488, 27338, 63893, 2956, 11321, 26973, 10808, 5747, 205, 6009, 7283, 7879, 1615, 11004, 10097, 4830, 10096, 1716, 6950, 9221, 5610, 221079, 7334, 3320, 1503, 5347, 29089, 84790, 10112, 7184, 84515, 4173, 4175, 8565, 55872, 699, 58477, 3735, 7525, 10212, 4436, 3833, 3832, 51182, 2778, 3326, 1062, 4171, 3329, 6897, 57403, 908, 990, 27102, 10606, 203068,…	551	1248	8431	1.54484	0.000203612	1.5664e-05	0.000324282
GOTERM_BP_FAT	GO:0044106~cellular amine metabolic process	20	3.13972	2.13342e-07	5717, 51582, 262, 5718, 3251, 5707, 5682, 5691, 5690, 10213, 9861, 5692, 5713, 5695, 5685, 5701, 5684, 5716, 5688, 23198	598	75	9126	4.06957	0.000983025	1.38521e-05	0.000402531
GOTERM_MF_FAT	GO:0001883~purine nucleoside binding	126	19.7802	2.20611e-07	84930, 5230, 8886, 29028, 22974, 3336, 10694, 488, 27338, 63893, 2956, 11321, 26973, 10808, 5747, 205, 6009, 7283, 7879, 1615, 11004, 10097, 4830, 10096, 1716, 6950, 9221, 5610, 221079, 7334, 3320, 1503, 5347, 29089, 84790, 10112, 7184, 84515, 4173, 4175, 8565, 55872, 699, 58477, 3735, 7525, 10212, 4436, 3833, 3832, 51182, 2778, 3326, 1062, 4171, 3329, 6897, 57403, 908, 990, 27102, 10606, 203068,…	551	1250	8431	1.54237	0.000218602	1.5616e-05	0.000348157
GOTERM_BP_FAT	GO:0009116~nucleoside metabolic process	45	7.06436	2.21716e-07	262, 84300, 54539, 29796, 5230, 7298, 4702, 191, 9551, 8833, 7167, 2597, 1503, 7371, 4860, 55526, 1349, 7083, 517, 514, 63979, 9377, 3251, 1340, 205, 1329, 509, 79031, 10059, 11164, 4436, 4715, 4710, 79691, 54205, 7381, 3939, 10476, 5471, 4830, 1716, 1337, 7388, 4694, 10165	598	297	9126	2.31225	0.00102159	1.41959e-05	0.00041833
GOTERM_CC_FAT	GO:0044454~nuclear chromosome part	52	8.16327	2.3023e-07	2146, 55723, 988, 81611, 1869, 3148, 113130, 10951, 10403, 51659, 1104, 6950, 54108, 51377, 983, 6790, 80145, 9126, 58516, 5347, 29128, 2956, 701, 5885, 5111, 86, 8896, 4173, 4175, 7528, 3619, 699, 7150, 4436, 9837, 8607, 79892, 3014, 3015, 9918, 4171, 79980, 253714, 2237, 5500, 3066, 891, 10189, 8208, 5591, 6741, 11335	602	343	8510	2.1431	0.000174499	7.2714e-06	0.000350899
GOTERM_BP_FAT	GO:0002479~antigen processing and presentation of exogenous peptide antigen via MHC class I, TAP-dependent	17	2.66876	2.49243e-07	5717, 5718, 5707, 5682, 5691, 5690, 10213, 9861, 5692, 5695, 5713, 5685, 5701, 5684, 5716, 5688, 23198	598	55	9126	4.717	0.00114835	1.57397e-05	0.000470267
GOTERM_BP_FAT	GO:0006415~translational termination	22	3.45369	2.74726e-07	6182, 9801, 51650, 56945, 11222, 51373, 51649, 3396, 55173, 51642, 28977, 6059, 28998, 143244, 64928, 57129, 1984, 29088, 64951, 64960, 29074, 54148	598	91	9126	3.68944	0.00126569	1.71146e-05	0.000518349
GOTERM_BP_FAT	GO:0007051~spindle organization	22	3.45369	2.74726e-07	126731, 3837, 29127, 332, 3833, 3832, 1104, 24137, 22974, 5902, 6790, 4605, 90417, 10615, 4751, 5347, 9493, 203068, 7272, 9793, 9055, 259266	598	91	9126	3.68944	0.00126569	1.71146e-05	0.000518349
GOTERM_BP_FAT	GO:0010965~regulation of mitotic sister chromatid separation	15	2.35479	3.0082e-07	10460, 11065, 699, 10403, 348654, 1063, 1062, 9700, 990, 5347, 891, 701, 9787, 7272, 4085	598	43	9126	5.32356	0.00138582	1.84902e-05	0.000567582
GOTERM_BP_FAT	GO:0044784~metaphase/anaphase transition of cell cycle	15	2.35479	3.0082e-07	10460, 11065, 699, 10403, 348654, 1063, 1062, 9700, 990, 5347, 891, 701, 9787, 7272, 4085	598	43	9126	5.32356	0.00138582	1.84902e-05	0.000567582
GOTERM_CC_FAT	GO:0005874~microtubule	45	7.06436	3.02891e-07	126731, 29127, 51203, 332, 22919, 6950, 22974, 24137, 10694, 983, 6790, 348235, 90417, 10615, 3925, 9493, 5347, 84790, 83658, 55605, 10112, 9793, 259266, 10808, 3619, 10059, 58477, 7283, 3833, 3832, 23160, 27436, 1062, 22948, 26586, 10376, 9735, 10576, 10128, 11004, 908, 9585, 4751, 203068, 9055	602	279	8510	2.28003	0.000229565	9.1836e-06	0.000461642
GOTERM_BP_FAT	GO:0000910~cytokinesis	21	3.2967	3.0716e-07	1894, 3619, 29127, 51203, 332, 24137, 11113, 26586, 54443, 9700, 55165, 25909, 10097, 10096, 9585, 990, 3925, 5347, 9493, 10112, 9055	598	84	9126	3.81522	0.00141501	1.86315e-05	0.000579544
GOTERM_MF_FAT	GO:0032555~purine ribonucleotide binding	126	19.7802	3.2354e-07	84930, 5230, 8886, 29028, 22974, 3336, 10694, 488, 27338, 63893, 2956, 11321, 26973, 10808, 5747, 205, 6009, 7283, 7879, 1615, 11004, 10097, 4830, 10096, 1716, 6950, 9221, 5610, 221079, 7334, 3320, 1503, 5347, 29089, 84790, 10112, 7184, 84515, 4173, 4175, 8565, 55872, 699, 58477, 3735, 7525, 10212, 4436, 3833, 3832, 51182, 2778, 3326, 1062, 4171, 3329, 6897, 57403, 908, 990, 27102, 10606, 203068,…	551	1258	8431	1.53256	0.000320577	2.1375e-05	0.000510593
GOTERM_BP_FAT	GO:0051304~chromosome separation	17	2.66876	3.28118e-07	10460, 11065, 699, 10403, 348654, 7153, 1063, 1062, 9918, 9700, 990, 5347, 891, 701, 9787, 7272, 4085	598	56	9126	4.63276	0.00151148	1.96443e-05	0.000619087
GOTERM_BP_FAT	GO:1903321~negative regulation of protein modification by small protein conjugation or removal	26	4.08163	3.33744e-07	5717, 5718, 5682, 9861, 5713, 5685, 5684, 983, 5716, 701, 11065, 3301, 79031, 5707, 1017, 5691, 5690, 10213, 5692, 5695, 5701, 23560, 5688, 991, 891, 4085	598	124	9126	3.19986	0.00153738	1.97249e-05	0.000629702
GOTERM_BP_FAT	GO:1903052~positive regulation of proteolysis involved in cellular protein catabolic process	29	4.55259	3.57713e-07	5717, 5718, 5682, 9861, 5713, 5685, 5684, 5716, 6790, 983, 23198, 7336, 5347, 701, 6613, 5747, 11065, 5707, 5691, 10213, 5690, 5692, 5695, 5701, 5688, 7341, 991, 891, 4085	598	150	9126	2.95043	0.0016477	2.08739e-05	0.000674926
GOTERM_BP_FAT	GO:0006457~protein folding	32	5.02355	3.73819e-07	10130, 7295, 10549, 131474, 5478, 6950, 10694, 3336, 9141, 5203, 3320, 1460, 7184, 26973, 10808, 3301, 79031, 51726, 51182, 30001, 22948, 3326, 51645, 5202, 10471, 3329, 10576, 7411, 134266, 908, 10728, 27000	598	177	9126	2.75903	0.00172182	2.15411e-05	0.000705314
GOTERM_BP_FAT	GO:0006396~RNA processing	86	13.5008	3.87431e-07	5437, 988, 27161, 10248, 54517, 5439, 51001, 25926, 6169, 9790, 80145, 10199, 87178, 79084, 3191, 5440, 23076, 79080, 10713, 79005, 705, 6732, 55759, 84946, 23212, 22944, 23160, 23450, 96764, 10907, 5036, 8458, 79897, 7884, 79691, 25879, 55656, 6741, 4839, 26986, 84294, 6637, 6636, 6633, 8106, 55110, 54888, 55164, 9221, 51692, 29080, 54931, 25804, 1994, 84154, 84844, 8896, 4234, 6626, 6627, 6629,…	598	760	9126	1.72689	0.00178446	2.20499e-05	0.000730998
GOTERM_BP_FAT	GO:0009308~amine metabolic process	20	3.13972	4.14683e-07	5717, 51582, 262, 5718, 3251, 5707, 5682, 5691, 5690, 10213, 9861, 5692, 5713, 5695, 5685, 5701, 5684, 5716, 5688, 23198	598	78	9126	3.91304	0.00190986	2.3313e-05	0.000782415
GOTERM_BP_FAT	GO:1903362~regulation of cellular protein catabolic process	36	5.65149	4.17075e-07	5717, 84300, 5718, 5682, 9861, 5713, 51377, 5685, 5684, 983, 6790, 5716, 23198, 7336, 5347, 701, 5886, 6613, 55737, 5747, 55872, 11065, 79031, 5707, 5691, 5690, 10213, 5692, 5695, 3326, 5701, 5688, 7341, 991, 891, 4085	598	215	9126	2.55531	0.00192087	2.3165e-05	0.000786928
GOTERM_BP_FAT	GO:0071426~ribonucleoprotein complex export from nucleus	24	3.76766	4.20627e-07	84946, 7514, 23212, 26019, 10212, 8106, 56943, 7979, 57122, 5901, 23165, 51692, 6059, 7884, 80145, 84248, 1984, 9688, 5433, 10189, 81929, 11260, 6426, 9631	598	109	9126	3.36019	0.00193721	2.30841e-05	0.00079363
GOTERM_MF_FAT	GO:0032553~ribonucleotide binding	126	19.7802	4.60467e-07	84930, 5230, 8886, 29028, 22974, 3336, 10694, 488, 27338, 63893, 2956, 11321, 26973, 10808, 5747, 205, 6009, 7283, 7879, 1615, 11004, 10097, 4830, 10096, 1716, 6950, 9221, 5610, 221079, 7334, 3320, 1503, 5347, 29089, 84790, 10112, 7184, 84515, 4173, 4175, 8565, 55872, 699, 58477, 3735, 7525, 10212, 4436, 3833, 3832, 51182, 2778, 3326, 1062, 4171, 3329, 6897, 57403, 908, 990, 27102, 10606, 203068,…	551	1267	8431	1.52167	0.000456219	2.85198e-05	0.000726684
GOTERM_MF_FAT	GO:0016818~hydrolase activity, acting on acid anhydrides, in phosphorus-containing anhydrides	70	10.989	4.64336e-07	8886, 29028, 9861, 24137, 10694, 9551, 488, 8833, 9790, 483, 5984, 9493, 2956, 11321, 55605, 63979, 29889, 509, 6009, 10059, 2617, 7283, 27032, 5983, 5982, 5701, 7879, 10376, 8458, 6059, 10767, 11004, 375, 4976, 1656, 9585, 10476, 51659, 9669, 5464, 3320, 9126, 84790, 83658, 10112, 517, 84515, 514, 4173, 4175, 11164, 4436, 3833, 9837, 10212, 3832, 7153, 8607, 2778, 1062, 5901, 4171, 3329, 23560, …	551	579	8431	1.84989	0.000460052	2.70677e-05	0.00073279
GOTERM_MF_FAT	GO:0016462~pyrophosphatase activity	70	10.989	4.64336e-07	8886, 29028, 9861, 24137, 10694, 9551, 488, 8833, 9790, 483, 5984, 9493, 2956, 11321, 55605, 63979, 29889, 509, 6009, 10059, 2617, 7283, 27032, 5983, 5982, 5701, 7879, 10376, 8458, 6059, 10767, 11004, 375, 4976, 1656, 9585, 10476, 51659, 9669, 5464, 3320, 9126, 84790, 83658, 10112, 517, 84515, 514, 4173, 4175, 11164, 4436, 3833, 9837, 10212, 3832, 7153, 8607, 2778, 1062, 5901, 4171, 3329, 23560, …	551	579	8431	1.84989	0.000460052	2.70677e-05	0.00073279
GOTERM_MF_FAT	GO:0016817~hydrolase activity, acting on acid anhydrides	70	10.989	5.04598e-07	8886, 29028, 9861, 24137, 10694, 9551, 488, 8833, 9790, 483, 5984, 9493, 2956, 11321, 55605, 63979, 29889, 509, 6009, 10059, 2617, 7283, 27032, 5983, 5982, 5701, 7879, 10376, 8458, 6059, 10767, 11004, 375, 4976, 1656, 9585, 10476, 51659, 9669, 5464, 3320, 9126, 84790, 83658, 10112, 517, 84515, 514, 4173, 4175, 11164, 4436, 3833, 9837, 10212, 3832, 7153, 8607, 2778, 1062, 5901, 4171, 3329, 23560, …	551	580	8431	1.84671	0.000499932	2.77806e-05	0.000796329
GOTERM_BP_FAT	GO:1903050~regulation of proteolysis involved in cellular protein catabolic process	34	5.33752	5.16043e-07	5717, 5718, 5682, 9861, 5713, 51377, 5685, 5684, 6790, 5716, 983, 23198, 7336, 5347, 701, 5886, 6613, 5747, 55872, 11065, 79031, 5707, 5691, 5690, 10213, 5692, 3326, 5695, 5701, 5688, 7341, 991, 891, 4085	598	198	9126	2.62055	0.00237613	2.79874e-05	0.000973659
GOTERM_BP_FAT	GO:0043933~macromolecular complex subunit organization	164	25.7457	5.16554e-07	2146, 29796, 10342, 3148, 84733, 51001, 51373, 6873, 29028, 55239, 54108, 10694, 6169, 79682, 143244, 27338, 87178, 79084, 3925, 6418, 29128, 10713, 1894, 8872, 5747, 4312, 7283, 55856, 5033, 23450, 10907, 10471, 9735, 64928, 1615, 7411, 11004, 80218, 10097, 10096, 1984, 7341, 4694, 8208, 11335, 6182, 9801, 54539, 55723, 126731, 81611, 5757, 22919, 6950, 7417, 55164, 5610, 28998, 25909, 23198, 25…	598	1760	9126	1.42204	0.00237848	2.76893e-05	0.000974623
GOTERM_BP_FAT	GO:0061640~cytoskeleton-dependent cytokinesis	13	2.04082	5.46765e-07	55165, 10097, 9585, 10096, 29127, 51203, 3925, 9493, 5347, 10112, 24137, 26586, 54443	598	33	9126	6.01186	0.00251741	2.89719e-05	0.00103162
GOTERM_BP_FAT	GO:0042590~antigen processing and presentation of exogenous peptide antigen via MHC class I	17	2.66876	5.57024e-07	5717, 5718, 5707, 5682, 5691, 5690, 10213, 9861, 5692, 5695, 5713, 5685, 5701, 5684, 5716, 5688, 23198	598	58	9126	4.47301	0.00256459	2.918e-05	0.00105098
GOTERM_BP_FAT	GO:0051306~mitotic sister chromatid separation	15	2.35479	5.66702e-07	10460, 11065, 699, 10403, 348654, 1063, 1062, 9700, 990, 5347, 891, 701, 9787, 7272, 4085	598	45	9126	5.08696	0.00260909	2.93535e-05	0.00106924
GOTERM_BP_FAT	GO:0007005~mitochondrion organization	66	10.3611	5.74211e-07	84300, 29796, 1869, 11222, 51001, 51373, 131474, 26519, 27166, 5534, 28977, 9141, 87178, 9650, 85465, 54148, 86, 10059, 3396, 5695, 7381, 64928, 9868, 54927, 4976, 57129, 79017, 54968, 29074, 4694, 6742, 23788, 9801, 6182, 54539, 10971, 51650, 56945, 7416, 4702, 5716, 28998, 54931, 3320, 64960, 29088, 284184, 55737, 401505, 2730, 51649, 8607, 4715, 55173, 4710, 51642, 3329, 10128, 54205, 134266, …	598	534	9126	1.88617	0.00264361	2.9412e-05	0.00108341
GOTERM_BP_FAT	GO:0051310~metaphase plate congression	14	2.1978	5.8844e-07	55143, 81610, 55165, 11004, 3837, 23212, 113130, 3833, 10403, 891, 1063, 1062, 81929, 54908	598	39	9126	5.47826	0.00270904	2.98096e-05	0.00111026
GOTERM_BP_FAT	GO:0051168~nuclear export	30	4.70958	6.34965e-07	1434, 7295, 7514, 26019, 57510, 8106, 56943, 10204, 51692, 80145, 84248, 9631, 84946, 23212, 10212, 7979, 5901, 57122, 5902, 23165, 6059, 7884, 9688, 1984, 55341, 5433, 10189, 81929, 11260, 6426	598	163	9126	2.80875	0.00292291	3.18168e-05	0.00119804
GOTERM_MF_FAT	GO:0051082~unfolded protein binding	21	3.2967	6.47157e-07	3301, 4869, 51726, 5478, 6950, 55164, 3326, 22948, 3336, 10694, 5202, 10471, 3329, 10576, 5203, 134266, 908, 3320, 8208, 10728, 7184	551	88	8431	3.65144	0.000641128	3.37538e-05	0.00102131
GOTERM_BP_FAT	GO:1901657~glycosyl compound metabolic process	45	7.06436	6.88888e-07	262, 84300, 54539, 29796, 5230, 7298, 4702, 191, 9551, 8833, 7167, 2597, 1503, 7371, 4860, 55526, 1349, 7083, 517, 514, 63979, 9377, 3251, 1340, 205, 1329, 509, 79031, 10059, 11164, 4436, 4715, 4710, 79691, 54205, 7381, 3939, 10476, 5471, 4830, 1716, 1337, 7388, 4694, 10165	598	309	9126	2.22246	0.00317074	3.41475e-05	0.00129978
GOTERM_BP_FAT	GO:0010467~gene expression	282	44.27	7.41866e-07	51575, 51373, 6873, 332, 29028, 55239, 9861, 51377, 4898, 79084, 29128, 79080, 6613, 10713, 8872, 8409, 55759, 84285, 7884, 4605, 1984, 7341, 8208, 55656, 11335, 55723, 84294, 55726, 51497, 5757, 4775, 51193, 128239, 55110, 8106, 54888, 5610, 55922, 51692, 92140, 25909, 7334, 2597, 7335, 1994, 5347, 4234, 55737, 1468, 10885, 3735, 10212, 10213, 2305, 10492, 1063, 6897, 22913, 56902, 9188, 84300, …	598	3436	9126	1.25249	0.00341416	3.63823e-05	0.00139973
GOTERM_BP_FAT	GO:0010608~posttranscriptional regulation of gene expression	53	8.32025	8.02186e-07	84300, 1869, 27161, 10247, 5682, 7298, 55239, 9861, 5685, 5684, 6169, 143244, 6418, 8872, 5707, 5691, 5690, 3396, 5692, 5695, 5701, 5036, 5688, 1656, 1984, 3646, 26986, 2058, 51123, 5717, 5718, 51204, 7514, 57510, 5713, 9669, 5610, 5716, 23198, 2597, 1994, 4869, 10213, 10492, 1736, 1965, 8087, 5901, 10128, 4528, 27102, 7534, 5433	598	395	9126	2.04766	0.00369125	3.89264e-05	0.00151354
GOTERM_BP_FAT	GO:0009161~ribonucleoside monophosphate metabolic process	36	5.65149	8.17648e-07	84300, 54539, 29796, 5230, 4702, 9551, 8833, 7167, 2597, 7371, 1349, 55526, 517, 514, 63979, 9377, 3251, 205, 1340, 1329, 509, 2618, 11164, 4436, 4715, 4710, 54205, 7381, 3939, 10476, 5471, 10606, 1337, 7388, 4694, 10165	598	221	9126	2.48593	0.00376226	3.92634e-05	0.00154272
GOTERM_BP_FAT	GO:0009167~purine ribonucleoside monophosphate metabolic process	35	5.49451	9.76363e-07	84300, 54539, 29796, 5230, 4702, 9551, 8833, 7167, 2597, 1349, 55526, 517, 514, 63979, 9377, 3251, 205, 1340, 1329, 509, 2618, 11164, 4436, 4715, 4710, 54205, 7381, 3939, 10476, 5471, 10606, 1337, 7388, 4694, 10165	598	213	9126	2.50765	0.00449092	4.64014e-05	0.00184217
GOTERM_BP_FAT	GO:0009126~purine nucleoside monophosphate metabolic process	35	5.49451	9.76363e-07	84300, 54539, 29796, 5230, 4702, 9551, 8833, 7167, 2597, 1349, 55526, 517, 514, 63979, 9377, 3251, 205, 1340, 1329, 509, 2618, 11164, 4436, 4715, 4710, 54205, 7381, 3939, 10476, 5471, 10606, 1337, 7388, 4694, 10165	598	213	9126	2.50765	0.00449092	4.64014e-05	0.00184217
GOTERM_BP_FAT	GO:0007093~mitotic cell cycle checkpoint	26	4.08163	9.88789e-07	55215, 11130, 8883, 1869, 11073, 55159, 10403, 348654, 6790, 983, 5347, 701, 7272, 5111, 890, 699, 4869, 1017, 4436, 7153, 1063, 9735, 55055, 891, 5591, 4085	598	131	9126	3.02887	0.00454795	4.65124e-05	0.00186562
GOTERM_MF_FAT	GO:0017111~nucleoside-triphosphatase activity	66	10.3611	1.00522e-06	8886, 29028, 9861, 24137, 10694, 9551, 488, 9790, 483, 5984, 9493, 2956, 11321, 55605, 63979, 29889, 509, 6009, 10059, 7283, 27032, 5983, 5982, 5701, 7879, 10376, 8458, 6059, 10767, 11004, 375, 1656, 4976, 9585, 10476, 51659, 9669, 3320, 9126, 84790, 83658, 10112, 517, 84515, 514, 4173, 4175, 4436, 3833, 9837, 10212, 3832, 7153, 8607, 2778, 1062, 5901, 4171, 3329, 23560, 57403, 4528, 55341, 20306…	551	545	8431	1.853	0.000995681	4.98076e-05	0.00158638
GOTERM_MF_FAT	GO:0005524~ATP binding	104	16.3265	1.09895e-06	84930, 5230, 8886, 29028, 22974, 10694, 3336, 488, 27338, 63893, 2956, 26973, 5747, 10808, 205, 1615, 11004, 10097, 10096, 4830, 1716, 6950, 9221, 5610, 7334, 3320, 1503, 5347, 29089, 10112, 84515, 7184, 4173, 4175, 8565, 55872, 699, 3735, 7525, 4436, 3833, 10212, 3832, 51182, 1062, 3326, 4171, 3329, 6897, 908, 27102, 10606, 990, 9188, 79572, 8767, 24137, 983, 8833, 9790, 9833, 5984, 9493, 55605,…	551	1005	8431	1.58342	0.00108847	5.18588e-05	0.0017343
GOTERM_BP_FAT	GO:1902099~regulation of metaphase/anaphase transition of cell cycle	14	2.1978	1.13008e-06	11065, 699, 10403, 348654, 1063, 1062, 9700, 990, 5347, 891, 701, 9787, 7272, 4085	598	41	9126	5.21103	0.00519614	5.26218e-05	0.00213221
GOTERM_BP_FAT	GO:0030071~regulation of mitotic metaphase/anaphase transition	14	2.1978	1.13008e-06	11065, 699, 10403, 348654, 1063, 1062, 9700, 990, 5347, 891, 701, 9787, 7272, 4085	598	41	9126	5.21103	0.00519614	5.26218e-05	0.00213221
GOTERM_MF_FAT	GO:0030554~adenyl nucleotide binding	106	16.6405	1.25117e-06	84930, 5230, 8886, 29028, 22974, 10694, 3336, 488, 27338, 63893, 2956, 26973, 5747, 10808, 205, 1615, 11004, 10097, 10096, 4830, 1716, 6950, 9221, 5610, 7334, 3320, 1503, 5347, 29089, 10112, 7184, 84515, 4173, 4175, 8565, 55872, 699, 3735, 7525, 4436, 3833, 10212, 3832, 51182, 1062, 3326, 4171, 3329, 6897, 134266, 908, 27102, 10606, 990, 9188, 79572, 8767, 24137, 191, 983, 8833, 9790, 9833, 5984,…	551	1033	8431	1.57012	0.00123914	5.6358e-05	0.00197452
GOTERM_BP_FAT	GO:0055086~nucleobase-containing small molecule metabolic process	58	9.10518	1.28083e-06	84300, 6120, 29796, 7295, 5230, 7298, 5160, 7296, 191, 9551, 8833, 7167, 4860, 1349, 63979, 3251, 205, 1340, 1329, 509, 10059, 2617, 2618, 4190, 79691, 7381, 10476, 4830, 1716, 1337, 7388, 4694, 10165, 262, 54539, 6241, 4702, 1503, 2597, 7371, 55526, 7083, 517, 514, 9377, 4200, 79031, 3735, 11164, 4436, 2778, 4715, 6996, 4710, 54205, 3939, 5471, 10606	598	456	9126	1.94108	0.00588721	5.90444e-05	0.00241662
GOTERM_BP_FAT	GO:0009119~ribonucleoside metabolic process	41	6.43642	1.29741e-06	262, 84300, 54539, 29796, 5230, 4702, 191, 9551, 8833, 7167, 2597, 1503, 7371, 4860, 55526, 1349, 517, 514, 63979, 9377, 3251, 1340, 205, 1329, 509, 79031, 11164, 4436, 4715, 4710, 79691, 54205, 7381, 3939, 10476, 4830, 1716, 1337, 7388, 4694, 10165	598	275	9126	2.27526	0.00596323	5.92168e-05	0.00244791
GOTERM_BP_FAT	GO:0043043~peptide biosynthetic process	66	10.3611	1.74744e-06	84300, 27161, 10247, 11222, 51001, 51373, 55239, 51629, 6169, 28977, 143244, 54148, 60386, 10056, 8872, 84285, 2617, 3396, 6059, 64928, 1615, 10767, 57129, 1984, 79017, 29074, 10165, 3646, 6741, 2058, 26986, 9801, 6182, 51650, 81034, 56945, 57510, 9669, 5610, 28998, 5464, 2597, 1994, 4677, 64960, 29088, 8894, 1468, 8565, 4869, 2730, 3735, 51649, 1965, 10492, 55173, 5901, 8087, 10987, 51642, 6897,…	598	551	9126	1.82798	0.00802333	7.89742e-05	0.00329699
GOTERM_BP_FAT	GO:0033047~regulation of mitotic sister chromatid segregation	15	2.35479	1.79578e-06	10460, 11065, 699, 10403, 348654, 1063, 1062, 9700, 990, 5347, 891, 701, 9787, 7272, 4085	598	49	9126	4.67169	0.00824439	8.03712e-05	0.0033882
GOTERM_BP_FAT	GO:0042787~protein ubiquitination involved in ubiquitin-dependent protein catabolic process	32	5.02355	1.83143e-06	5717, 5718, 5682, 9861, 5713, 5685, 5684, 6790, 5716, 983, 23198, 5347, 29128, 701, 6921, 5747, 11065, 79031, 5707, 5691, 5690, 10213, 5692, 5695, 5701, 9232, 5688, 200933, 8453, 991, 891, 4085	598	190	9126	2.57025	0.00840734	8.11783e-05	0.00345546
GOTERM_BP_FAT	GO:0031331~positive regulation of cellular catabolic process	35	5.49451	2.30959e-06	5717, 84300, 5718, 27161, 5682, 9861, 5713, 5685, 4898, 5684, 6790, 5716, 983, 23198, 87178, 7336, 5347, 701, 6613, 55737, 5747, 11065, 5707, 5691, 5690, 10213, 5692, 5695, 5701, 5688, 7341, 991, 891, 4085, 26986	598	221	9126	2.41688	0.0105908	0.000101397	0.00435762
GOTERM_BP_FAT	GO:0006412~translation	64	10.0471	2.37712e-06	84300, 27161, 10247, 11222, 51001, 51373, 55239, 51629, 6169, 28977, 143244, 54148, 60386, 10056, 8872, 84285, 2617, 3396, 6059, 1615, 64928, 10767, 57129, 1984, 29074, 10165, 3646, 6741, 2058, 26986, 9801, 6182, 51650, 81034, 56945, 57510, 9669, 5610, 28998, 5464, 2597, 1994, 4677, 64960, 29088, 8894, 1468, 8565, 4869, 3735, 51649, 1965, 10492, 55173, 8087, 5901, 10987, 51642, 6897, 10128, 4528,…	598	533	9126	1.83245	0.0108987	0.000103377	0.00448503
GOTERM_MF_FAT	GO:0032559~adenyl ribonucleotide binding	104	16.3265	2.50692e-06	84930, 5230, 8886, 29028, 22974, 10694, 3336, 488, 27338, 63893, 2956, 26973, 5747, 10808, 205, 1615, 11004, 10097, 10096, 4830, 1716, 6950, 9221, 5610, 7334, 3320, 1503, 5347, 29089, 10112, 84515, 7184, 4173, 4175, 8565, 55872, 699, 3735, 7525, 4436, 3833, 10212, 3832, 51182, 1062, 3326, 4171, 3329, 6897, 908, 27102, 10606, 990, 9188, 79572, 8767, 24137, 983, 8833, 9790, 9833, 5984, 9493, 55605,…	551	1023	8431	1.55555	0.00248128	0.00010801	0.00395622
GOTERM_BP_FAT	GO:0009141~nucleoside triphosphate metabolic process	35	5.49451	2.56236e-06	84300, 54539, 29796, 5230, 7298, 4702, 9551, 7167, 2597, 1503, 7371, 55526, 1349, 517, 514, 63979, 9377, 205, 1340, 1329, 509, 11164, 4436, 4715, 4710, 54205, 7381, 3939, 10476, 4830, 1716, 1337, 7388, 4694, 10165	598	222	9126	2.40599	0.011743	0.000110391	0.00483451
GOTERM_BP_FAT	GO:0043487~regulation of RNA stability	25	3.92465	2.60978e-06	5717, 5718, 1869, 7514, 5682, 9861, 5713, 5685, 5684, 5716, 23198, 6418, 1994, 5707, 5691, 10213, 5690, 10492, 1736, 5692, 5695, 5701, 5688, 7534, 26986	598	129	9126	2.95753	0.011959	0.000111393	0.00492398
GOTERM_BP_FAT	GO:0070647~protein modification by small protein conjugation or removal	85	13.3438	2.63502e-06	79184, 84930, 8883, 84733, 5682, 8767, 332, 9861, 51377, 5685, 5684, 983, 9100, 27338, 63893, 29128, 701, 5885, 6613, 10713, 6921, 7398, 9442, 5747, 10054, 3619, 3301, 5707, 5691, 5690, 5692, 5695, 57122, 5701, 23165, 5688, 25879, 8453, 9688, 7341, 4085, 55215, 5717, 5718, 865, 55159, 205564, 387521, 56943, 5713, 5716, 6790, 23198, 51256, 9126, 3320, 7334, 54165, 7335, 7336, 5347, 29089, 5111, 78…	598	783	9126	1.65667	0.012074	0.000111438	0.0049716
GOTERM_MF_FAT	GO:0015631~tubulin binding	33	5.18053	3.41227e-06	126731, 81610, 29127, 51203, 332, 22919, 24137, 348235, 9141, 2597, 3925, 9493, 5347, 55605, 10112, 9793, 10808, 8409, 10059, 3833, 3832, 23160, 27436, 22948, 1062, 7411, 10128, 11004, 4976, 9585, 4830, 9217, 9055	551	206	8431	2.45117	0.00337585	0.000140888	0.00538493
GOTERM_BP_FAT	GO:0009199~ribonucleoside triphosphate metabolic process	33	5.18053	3.71742e-06	84300, 54539, 29796, 5230, 4702, 9551, 7167, 2597, 1503, 7371, 55526, 1349, 517, 514, 63979, 9377, 205, 1340, 1329, 509, 11164, 4436, 4715, 4710, 54205, 7381, 3939, 10476, 4830, 1337, 7388, 4694, 10165	598	206	9126	2.4447	0.0169913	0.000155782	0.00701375
GOTERM_BP_FAT	GO:0043488~regulation of mRNA stability	24	3.76766	3.85103e-06	5717, 5718, 1869, 7514, 5707, 5682, 5691, 10213, 5690, 10492, 9861, 5692, 5713, 5695, 5685, 5701, 5684, 5716, 5688, 23198, 1994, 6418, 7534, 26986	598	123	9126	2.97773	0.0175966	0.000159927	0.00726582
GOTERM_BP_FAT	GO:0034660~ncRNA metabolic process	58	9.10518	4.09296e-06	5437, 10248, 27161, 54517, 5439, 25926, 6169, 9790, 10199, 87178, 5440, 84172, 23076, 79080, 54148, 705, 10056, 84946, 55759, 2617, 23212, 23160, 5036, 79897, 79691, 1615, 25879, 4691, 55656, 6741, 4839, 2058, 84294, 55726, 54888, 55164, 9221, 54931, 29080, 5464, 84365, 84154, 4677, 4234, 8565, 10885, 3735, 1736, 51118, 23560, 51602, 6897, 51605, 10557, 56902, 5433, 9188, 84916	598	473	9126	1.87131	0.0186917	0.000168455	0.00772227
GOTERM_BP_FAT	GO:0045132~meiotic chromosome segregation	13	2.04082	4.18897e-06	9319, 7153, 9700, 79980, 9232, 10097, 10096, 5347, 5885, 151246, 7272, 2177, 10051	598	39	9126	5.08696	0.0191259	0.000170881	0.0079034
GOTERM_BP_FAT	GO:0044839~cell cycle G2/M phase transition	28	4.3956	4.42044e-06	55215, 84930, 8883, 11073, 6873, 332, 22919, 22974, 6790, 983, 9833, 3320, 5347, 9793, 890, 7283, 4869, 1017, 2305, 1063, 11113, 3161, 9133, 4751, 5500, 203068, 891, 7532	598	160	9126	2.67065	0.020172	0.000178741	0.0083401
GOTERM_BP_FAT	GO:0002478~antigen processing and presentation of exogenous peptide antigen	25	3.92465	4.5583e-06	5717, 5718, 29127, 5707, 5682, 5691, 10213, 3832, 5690, 9861, 5692, 5713, 24137, 1062, 5695, 5685, 5701, 5684, 7879, 5716, 5688, 11004, 23198, 375, 9493	598	133	9126	2.86858	0.0207946	0.000182712	0.00860019
GOTERM_BP_FAT	GO:0070126~mitochondrial translational termination	19	2.98273	5.04889e-06	9801, 6182, 51650, 56945, 11222, 51373, 51649, 3396, 55173, 51642, 28977, 28998, 64928, 57129, 29088, 64951, 64960, 29074, 54148	598	83	9126	3.49345	0.0230067	0.00020063	0.00952575
GOTERM_BP_FAT	GO:0038093~Fc receptor signaling pathway	27	4.23862	5.81807e-06	5717, 5718, 4775, 5682, 9861, 5713, 5685, 5684, 5716, 5534, 23198, 7334, 3320, 7335, 5747, 7525, 5707, 5691, 10213, 5690, 5692, 3326, 5695, 5701, 5688, 10097, 10096	598	153	9126	2.69309	0.0264649	0.000229216	0.0109769
GOTERM_BP_FAT	GO:0019884~antigen processing and presentation of exogenous antigen	25	3.92465	5.9647e-06	5717, 5718, 29127, 5707, 5682, 5691, 10213, 3832, 5690, 9861, 5692, 5713, 24137, 1062, 5695, 5685, 5701, 5684, 7879, 5716, 5688, 11004, 23198, 375, 9493	598	135	9126	2.82609	0.0271227	0.000233001	0.0112535
GOTERM_CC_FAT	GO:0005643~nuclear pore	18	2.82575	6.11134e-06	3837, 3836, 3838, 56943, 57122, 10204, 5901, 23165, 3840, 25909, 143244, 1984, 9688, 7341, 81929, 4085, 11260, 9631	602	71	8510	3.58383	0.0046217	0.000178154	0.00931405
GOTERM_BP_FAT	GO:0042176~regulation of protein catabolic process	42	6.59341	6.18088e-06	5717, 84300, 5718, 81610, 7514, 5682, 9861, 51377, 5713, 5685, 4898, 5684, 983, 6790, 5716, 23198, 5347, 7336, 701, 5886, 6613, 51582, 55737, 5747, 55872, 11065, 79031, 5707, 5691, 5690, 10213, 5692, 23450, 5695, 3326, 5701, 7879, 5688, 991, 7341, 891, 4085	598	303	9126	2.11537	0.0280918	0.000239416	0.0116614
GOTERM_BP_FAT	GO:0031329~regulation of cellular catabolic process	42	6.59341	6.7197e-06	5717, 84300, 5718, 27161, 5682, 9861, 51377, 5713, 5685, 4898, 5684, 983, 6790, 5716, 23198, 87178, 7336, 5347, 701, 5886, 6613, 55737, 5747, 55872, 11065, 79031, 5707, 5691, 5690, 10213, 5692, 5695, 3326, 5701, 5688, 10128, 5500, 7341, 991, 891, 4085, 26986	598	304	9126	2.10841	0.030503	0.000258116	0.0126779
GOTERM_BP_FAT	GO:0051028~mRNA transport	24	3.76766	6.75321e-06	7514, 26019, 10212, 55110, 8106, 56943, 7979, 57122, 10204, 23165, 51692, 7884, 80145, 10128, 25909, 143244, 84248, 1984, 9688, 5433, 10189, 81929, 6426, 9631	598	127	9126	2.88394	0.0306528	0.000257259	0.0127411
GOTERM_MF_FAT	GO:0008017~microtubule binding	27	4.23862	6.9306e-06	126731, 81610, 29127, 51203, 332, 22919, 24137, 348235, 2597, 9493, 5347, 55605, 10112, 9793, 8409, 10059, 3833, 3832, 27436, 23160, 1062, 10128, 11004, 4976, 9585, 9217, 9055	551	155	8431	2.66538	0.00684472	0.000274692	0.010937
GOTERM_BP_FAT	GO:0046034~ATP metabolic process	30	4.70958	7.11811e-06	84300, 54539, 29796, 5230, 4702, 9551, 7167, 2597, 1349, 55526, 517, 514, 63979, 9377, 205, 1340, 509, 1329, 11164, 4436, 4715, 4710, 54205, 7381, 3939, 10476, 1337, 7388, 4694, 10165	598	183	9126	2.50178	0.0322821	0.000268936	0.0134295
GOTERM_BP_FAT	GO:0070125~mitochondrial translational elongation	19	2.98273	7.20693e-06	9801, 6182, 51650, 56945, 11222, 51373, 51649, 3396, 55173, 51642, 28977, 28998, 64928, 57129, 29088, 64951, 64960, 29074, 54148	598	85	9126	3.41125	0.0326782	0.000270078	0.0135971
GOTERM_BP_FAT	GO:0006405~RNA export from nucleus	22	3.45369	7.21552e-06	26019, 10212, 57510, 8106, 56943, 7979, 5901, 57122, 23165, 51692, 5902, 7884, 80145, 84248, 1984, 9688, 5433, 10189, 81929, 11260, 6426, 9631	598	110	9126	3.05217	0.0327165	0.000268219	0.0136133
GOTERM_BP_FAT	GO:0030261~chromosome condensation	10	1.56986	7.35735e-06	64151, 54892, 23397, 51203, 113130, 891, 7153, 9918, 983, 10051	598	23	9126	6.63516	0.0333488	0.000271303	0.0138809
GOTERM_CC_FAT	GO:0005740~mitochondrial envelope	70	10.989	7.4057e-06	84300, 29796, 11222, 51001, 7298, 51373, 131474, 51629, 9551, 26519, 27166, 28977, 57380, 87178, 3052, 1349, 54148, 60386, 1340, 1329, 509, 51012, 10059, 63933, 3396, 79691, 7381, 64928, 9868, 54927, 4976, 57129, 10476, 4830, 54968, 29074, 1337, 7388, 4694, 23788, 10165, 9801, 6182, 54539, 51650, 81034, 56945, 100188893, 7416, 7417, 4702, 28998, 64960, 29088, 517, 514, 9377, 401505, 1468, 51649, …	602	577	8510	1.71497	0.00559781	0.000207887	0.0112866
GOTERM_BP_FAT	GO:0000281~mitotic cytokinesis	11	1.72684	8.55382e-06	55165, 9585, 29127, 51203, 3925, 9493, 5347, 10112, 24137, 26586, 54443	598	29	9126	5.78861	0.0386659	0.000312913	0.016138
GOTERM_CC_FAT	GO:0044455~mitochondrial membrane part	29	4.55259	8.78041e-06	54539, 29796, 100188893, 4702, 9551, 26519, 1349, 517, 514, 401505, 9377, 509, 1329, 63933, 4715, 4710, 3329, 7381, 9868, 54927, 134266, 4976, 79135, 10476, 54968, 1337, 4694, 7388, 10452	602	163	8510	2.51503	0.00663348	0.000237671	0.0133816
GOTERM_BP_FAT	GO:0031570~DNA integrity checkpoint	24	3.76766	8.84993e-06	55215, 79184, 988, 8883, 1869, 81620, 890, 11073, 4869, 55159, 1017, 4436, 7153, 3014, 6790, 983, 990, 5347, 83695, 891, 5111, 261726, 5591, 51514	598	129	9126	2.83923	0.0399773	0.000321195	0.0166966
GOTERM_BP_FAT	GO:0071822~protein complex subunit organization	114	17.8964	9.0945e-06	29796, 3148, 10342, 51373, 55239, 10694, 79682, 143244, 27338, 87178, 6418, 3925, 1894, 8872, 5747, 4312, 7283, 55856, 23450, 5033, 10471, 9735, 7411, 1615, 64928, 11004, 10097, 10096, 1984, 7341, 4694, 8208, 9801, 6182, 54539, 126731, 55723, 81611, 5757, 22919, 7417, 6950, 5610, 28998, 25909, 23198, 3320, 2175, 1460, 29088, 3837, 1063, 55173, 1062, 3014, 4171, 3329, 79139, 891, 84300, 10247, 515…	598	1175	9126	1.48063	0.0410591	0.000327492	0.017158
GOTERM_CC_FAT	GO:0072686~mitotic spindle	15	2.35479	9.46483e-06	1894, 126731, 81610, 29899, 29127, 1062, 9700, 6790, 983, 90417, 9585, 10615, 9493, 4085, 259266	602	52	8510	4.07775	0.0071487	0.000247362	0.0144246
GOTERM_BP_FAT	GO:0009117~nucleotide metabolic process	52	8.16327	9.60318e-06	84300, 6120, 29796, 5230, 5160, 7298, 9551, 8833, 7167, 4860, 1349, 63979, 3251, 205, 1340, 509, 1329, 2617, 10059, 2618, 4190, 7381, 10476, 4830, 1716, 1337, 7388, 4694, 10165, 54539, 6241, 4702, 1503, 2597, 7371, 55526, 7083, 517, 514, 9377, 4200, 3735, 4436, 11164, 2778, 4715, 6996, 4710, 54205, 3939, 5471, 10606	598	418	9126	1.89848	0.0433052	0.000343126	0.0181176
GOTERM_BP_FAT	GO:0032446~protein modification by small protein conjugation	75	11.7739	9.6532e-06	84930, 8883, 84733, 5682, 332, 8767, 9861, 5685, 5684, 983, 27338, 63893, 29128, 701, 5885, 6613, 6921, 9442, 5747, 10054, 3619, 3301, 5707, 5691, 5690, 5692, 5695, 57122, 5701, 23165, 5688, 25879, 8453, 9688, 7341, 4085, 55215, 5717, 5718, 865, 55159, 205564, 387521, 5713, 5716, 6790, 23198, 51256, 7334, 9126, 54165, 7335, 5347, 7336, 29089, 5111, 9631, 51514, 55143, 11065, 79031, 79677, 7150, 1…	598	687	9126	1.66603	0.0435258	0.000342261	0.018212
GOTERM_BP_FAT	GO:0002223~stimulatory C-type lectin receptor signaling pathway	19	2.98273	1.01602e-05	5717, 5718, 5707, 5682, 5691, 5690, 10213, 9861, 5692, 5713, 5695, 5685, 5701, 5684, 5716, 5688, 23198, 7334, 7335	598	87	9126	3.33283	0.0457589	0.000357485	0.0191685
GOTERM_BP_FAT	GO:0002220~innate immune response activating cell surface receptor signaling pathway	19	2.98273	1.01602e-05	5717, 5718, 5707, 5682, 5691, 5690, 10213, 9861, 5692, 5713, 5695, 5685, 5701, 5684, 5716, 5688, 23198, 7334, 7335	598	87	9126	3.33283	0.0457589	0.000357485	0.0191685
GOTERM_BP_FAT	GO:0009144~purine nucleoside triphosphate metabolic process	32	5.02355	1.02413e-05	84300, 54539, 29796, 5230, 4702, 9551, 7167, 2597, 55526, 1349, 517, 514, 63979, 9377, 205, 1340, 1329, 509, 11164, 4436, 4715, 4710, 54205, 7381, 3939, 10476, 4830, 1716, 1337, 7388, 4694, 10165	598	206	9126	2.37062	0.0461155	0.000357608	0.0193214
GOTERM_CC_FAT	GO:0005829~cytosol	231	36.2637	1.04962e-05	8883, 10342, 5230, 29127, 332, 9861, 51377, 10204, 4898, 6491, 7167, 79084, 3925, 5747, 8027, 55856, 7879, 7884, 10097, 10096, 1984, 1716, 8208, 10728, 1434, 23397, 4775, 128239, 22919, 5610, 3840, 348235, 25909, 7334, 2597, 7335, 1994, 5347, 1460, 55526, 7184, 51582, 55737, 3837, 58478, 3836, 3735, 3838, 10213, 3832, 51182, 1063, 1062, 6897, 908, 3939, 10606, 56902, 10598, 27161, 64151, 10247, 5…	602	2582	8510	1.2647	0.00792461	0.000265171	0.0159964
GOTERM_BP_FAT	GO:0022411~cellular component disassembly	50	7.84929	1.13016e-05	3148, 10247, 11222, 51534, 51373, 55239, 28977, 983, 143244, 6418, 3925, 54148, 5747, 4312, 10059, 3396, 57122, 7443, 23165, 6059, 64928, 11004, 10767, 57129, 1984, 9688, 29074, 6182, 9801, 126731, 51650, 56945, 8815, 28998, 5347, 29088, 64960, 9631, 3837, 3836, 51649, 7153, 55173, 26586, 51642, 4528, 9133, 64951, 891, 81929	598	398	9126	1.91719	0.0507665	0.000391656	0.0213215
GOTERM_BP_FAT	GO:1904874~positive regulation of telomerase RNA localization to Cajal body	8	1.25589	1.13339e-05	10576, 908, 1736, 8607, 6950, 22948, 55164, 10694	598	14	9126	8.7205	0.0509081	0.000389847	0.0213825
GOTERM_BP_FAT	GO:0090671~telomerase RNA localization to Cajal body	8	1.25589	1.13339e-05	10576, 908, 1736, 8607, 6950, 22948, 55164, 10694	598	14	9126	8.7205	0.0509081	0.000389847	0.0213825
GOTERM_BP_FAT	GO:0090670~RNA localization to Cajal body	8	1.25589	1.13339e-05	10576, 908, 1736, 8607, 6950, 22948, 55164, 10694	598	14	9126	8.7205	0.0509081	0.000389847	0.0213825
GOTERM_BP_FAT	GO:1904872~regulation of telomerase RNA localization to Cajal body	8	1.25589	1.13339e-05	10576, 908, 1736, 8607, 6950, 22948, 55164, 10694	598	14	9126	8.7205	0.0509081	0.000389847	0.0213825
GOTERM_BP_FAT	GO:0090672~telomerase RNA localization	8	1.25589	1.13339e-05	10576, 908, 1736, 8607, 6950, 22948, 55164, 10694	598	14	9126	8.7205	0.0509081	0.000389847	0.0213825
GOTERM_CC_FAT	GO:0044429~mitochondrial part	86	13.5008	1.17898e-05	84300, 29796, 10797, 11222, 51001, 7298, 51373, 5160, 131474, 51629, 9551, 3336, 26519, 27166, 28977, 55379, 57380, 87178, 3052, 1349, 54148, 60386, 1340, 205, 1329, 509, 51012, 10059, 2617, 63933, 3396, 6059, 79691, 7381, 64928, 9868, 54927, 4976, 57129, 4830, 10476, 1716, 54968, 29074, 1337, 4694, 7388, 6742, 23788, 10165, 9801, 6182, 54539, 51650, 81034, 56945, 100188893, 7416, 4702, 7417, 289…	602	766	8510	1.58709	0.00889692	0.00028824	0.0179677
GOTERM_BP_FAT	GO:0000086~G2/M transition of mitotic cell cycle	26	4.08163	1.24642e-05	55215, 84930, 8883, 11073, 6873, 332, 22919, 22974, 6790, 983, 9833, 3320, 5347, 9793, 890, 7283, 1017, 2305, 11113, 3161, 9133, 4751, 5500, 203068, 891, 7532	598	150	9126	2.64522	0.0558406	0.000425541	0.0235147
GOTERM_BP_FAT	GO:0045732~positive regulation of protein catabolic process	33	5.18053	1.24792e-05	5717, 84300, 5718, 5682, 9861, 5713, 5685, 4898, 5684, 6790, 5716, 983, 23198, 7336, 5347, 701, 6613, 55737, 5747, 11065, 5707, 5691, 5690, 10213, 5692, 5695, 5701, 7879, 5688, 7341, 991, 891, 4085	598	218	9126	2.31013	0.0559061	0.000422923	0.0235431
GOTERM_BP_FAT	GO:0046128~purine ribonucleoside metabolic process	37	5.80848	1.25789e-05	262, 84300, 54539, 29796, 5230, 4702, 191, 9551, 8833, 7167, 2597, 4860, 55526, 1349, 517, 514, 63979, 9377, 3251, 1340, 205, 1329, 509, 11164, 4436, 4715, 4710, 54205, 7381, 3939, 10476, 4830, 1716, 1337, 7388, 4694, 10165	598	259	9126	2.18012	0.0563399	0.00042319	0.0237311
GOTERM_BP_FAT	GO:0032543~mitochondrial translation	22	3.45369	1.28749e-05	84300, 6182, 9801, 51650, 56945, 11222, 51001, 51373, 51649, 3396, 55173, 51642, 28977, 28998, 64928, 4528, 57129, 29088, 64951, 64960, 29074, 54148	598	114	9126	2.94508	0.0576266	0.000430007	0.0242894
GOTERM_CC_FAT	GO:0098798~mitochondrial protein complex	26	4.08163	1.32837e-05	54539, 29796, 100188893, 4702, 9551, 26519, 87178, 517, 514, 401505, 9377, 509, 1329, 1737, 4715, 4710, 7381, 134266, 54927, 9868, 10476, 79135, 1337, 7388, 4694, 10452	602	140	8510	2.6253	0.0100186	0.00031461	0.0202441
GOTERM_BP_FAT	GO:0006753~nucleoside phosphate metabolic process	52	8.16327	1.34694e-05	84300, 6120, 29796, 5230, 5160, 7298, 9551, 8833, 7167, 4860, 1349, 63979, 3251, 205, 1340, 509, 1329, 2617, 10059, 2618, 4190, 7381, 10476, 4830, 1716, 1337, 7388, 4694, 10165, 54539, 6241, 4702, 1503, 2597, 7371, 55526, 7083, 517, 514, 9377, 4200, 3735, 4436, 11164, 2778, 4715, 6996, 4710, 54205, 3939, 5471, 10606	598	423	9126	1.87604	0.0602056	0.000446621	0.0254108
GOTERM_BP_FAT	GO:0042278~purine nucleoside metabolic process	37	5.80848	1.36854e-05	262, 84300, 54539, 29796, 5230, 4702, 191, 9551, 8833, 7167, 2597, 4860, 55526, 1349, 517, 514, 63979, 9377, 3251, 1340, 205, 1329, 509, 11164, 4436, 4715, 4710, 54205, 7381, 3939, 10476, 4830, 1716, 1337, 7388, 4694, 10165	598	260	9126	2.17174	0.0611411	0.000450542	0.0258183
GOTERM_BP_FAT	GO:0032984~macromolecular complex disassembly	32	5.02355	1.37862e-05	6182, 9801, 126731, 51650, 10247, 56945, 11222, 51534, 51373, 55239, 28977, 28998, 143244, 3925, 6418, 29088, 64960, 54148, 51649, 3396, 55173, 26586, 51642, 6059, 64928, 10767, 4528, 11004, 57129, 1984, 64951, 29074	598	209	9126	2.33659	0.0615772	0.000450641	0.0260084
GOTERM_CC_FAT	GO:0031966~mitochondrial membrane	66	10.3611	1.41198e-05	84300, 29796, 11222, 51001, 7298, 51373, 51629, 9551, 26519, 28977, 57380, 3052, 1349, 54148, 60386, 1340, 1329, 509, 10059, 63933, 3396, 79691, 7381, 64928, 9868, 54927, 4976, 57129, 10476, 4830, 54968, 29074, 1337, 7388, 4694, 23788, 10165, 9801, 6182, 54539, 51650, 81034, 56945, 100188893, 7416, 7417, 4702, 28998, 64960, 29088, 517, 514, 9377, 401505, 1468, 51649, 4715, 55173, 4710, 51642, 332…	602	544	8510	1.71506	0.0106458	0.000324277	0.0215182
GOTERM_BP_FAT	GO:0038095~Fc-epsilon receptor signaling pathway	21	3.2967	1.42661e-05	5717, 5718, 5707, 4775, 5682, 5691, 10213, 5690, 9861, 5692, 5713, 5695, 5685, 5701, 5684, 5716, 5534, 5688, 23198, 7334, 7335	598	106	9126	3.02338	0.0636512	0.000463042	0.0269137
GOTERM_BP_FAT	GO:0042254~ribosome biogenesis	41	6.43642	1.4597e-05	84294, 51491, 7514, 51001, 25926, 55164, 9221, 6169, 9790, 54663, 29080, 10199, 84154, 23076, 79080, 705, 29889, 10885, 55759, 84946, 23212, 4869, 55299, 1736, 51388, 9816, 23160, 51118, 5901, 5036, 23560, 6059, 79897, 51602, 25879, 10557, 55341, 56902, 9188, 84916, 4839	598	303	9126	2.065	0.0650783	0.000470466	0.0275378
GOTERM_BP_FAT	GO:0009205~purine ribonucleoside triphosphate metabolic process	31	4.86656	1.51623e-05	84300, 54539, 29796, 5230, 4702, 9551, 7167, 2597, 1349, 55526, 517, 514, 63979, 9377, 205, 1340, 1329, 509, 11164, 4436, 4715, 4710, 54205, 7381, 3939, 10476, 4830, 1337, 7388, 4694, 10165	598	200	9126	2.36543	0.0675118	0.00048529	0.0286042
GOTERM_BP_FAT	GO:0043604~amide biosynthetic process	66	10.3611	1.80042e-05	84300, 27161, 10247, 11222, 51001, 51373, 55239, 51629, 6169, 28977, 143244, 54148, 60386, 10056, 8872, 84285, 2617, 3396, 6059, 64928, 1615, 10767, 57129, 1984, 79017, 29074, 10165, 3646, 6741, 2058, 26986, 9801, 6182, 51650, 81034, 56945, 57510, 9669, 5610, 28998, 5464, 2597, 1994, 4677, 64960, 29088, 8894, 1468, 8565, 4869, 2730, 3735, 51649, 1965, 10492, 55173, 5901, 8087, 10987, 51642, 6897,…	598	591	9126	1.70426	0.0796489	0.000572251	0.0339646
GOTERM_MF_FAT	GO:0097367~carbohydrate derivative binding	134	21.0361	1.84297e-05	84930, 5230, 8886, 29028, 22974, 3336, 10694, 488, 9141, 27338, 63893, 2956, 11321, 26973, 10808, 5747, 205, 6009, 7283, 7879, 1615, 11004, 10097, 4830, 10096, 1716, 6950, 9221, 5610, 221079, 7334, 3320, 1503, 5347, 29089, 84790, 10112, 7184, 84515, 4173, 4175, 8565, 55872, 699, 58477, 3735, 7525, 10212, 4436, 3833, 3832, 51182, 2778, 3326, 1062, 128869, 4171, 3329, 6897, 57403, 908, 990, 27102, …	551	1466	8431	1.39862	0.0180982	0.000702214	0.0290808
GOTERM_BP_FAT	GO:0048002~antigen processing and presentation of peptide antigen	25	3.92465	1.85492e-05	5717, 5718, 29127, 5707, 5682, 5691, 10213, 3832, 5690, 9861, 5692, 5713, 24137, 1062, 5695, 5685, 5701, 5684, 7879, 5716, 5688, 11004, 23198, 375, 9493	598	144	9126	2.64946	0.0819584	0.000585531	0.0349926
GOTERM_BP_FAT	GO:0051052~regulation of DNA metabolic process	37	5.80848	1.92706e-05	79184, 6950, 10694, 983, 1054, 7334, 9126, 5984, 7335, 7336, 29128, 2956, 5111, 7874, 7398, 63979, 81620, 3836, 4869, 3838, 1017, 4436, 7153, 1736, 5983, 2305, 5982, 3014, 22948, 23560, 10576, 908, 27101, 990, 4751, 10189, 27000	598	264	9126	2.13883	0.0850067	0.000604161	0.0363533
GOTERM_BP_FAT	GO:0007091~metaphase/anaphase transition of mitotic cell cycle	12	1.88383	2.02623e-05	10460, 699, 5347, 10403, 348654, 891, 9787, 701, 1063, 7272, 4085, 9700	598	38	9126	4.81922	0.0891802	0.000630951	0.0382238
GOTERM_BP_FAT	GO:0034502~protein localization to chromosome	13	2.04082	2.14306e-05	2146, 1736, 6950, 22948, 54908, 10694, 983, 10576, 908, 5347, 5885, 701, 7272	598	45	9126	4.4087	0.0940727	0.000662842	0.0404273
GOTERM_CC_FAT	GO:0005839~proteasome core complex	9	1.41287	2.2208e-05	5688, 23198, 5682, 5691, 5690, 5692, 5695, 5685, 5684	602	19	8510	6.6961	0.016693	0.000494992	0.0338425
GOTERM_BP_FAT	GO:0043624~cellular protein complex disassembly	26	4.08163	2.22981e-05	6182, 9801, 51650, 126731, 56945, 11222, 51373, 28977, 28998, 143244, 3925, 29088, 64960, 54148, 51649, 3396, 55173, 26586, 51642, 6059, 64928, 11004, 57129, 1984, 64951, 29074	598	155	9126	2.55989	0.0976884	0.000685067	0.0420634
GOTERM_BP_FAT	GO:0007080~mitotic metaphase plate congression	11	1.72684	2.30294e-05	55143, 55165, 11004, 3837, 23212, 113130, 3833, 891, 1062, 81929, 54908	598	32	9126	5.24592	0.100726	0.000702845	0.0434427
GOTERM_BP_FAT	GO:0051653~spindle localization	11	1.72684	2.30294e-05	29899, 3837, 10097, 10096, 10615, 51203, 10403, 23160, 54908, 259266, 9700	598	32	9126	5.24592	0.100726	0.000702845	0.0434427
GOTERM_BP_FAT	GO:1902579~multi-organism localization	16	2.51177	2.48818e-05	3837, 7514, 3836, 3838, 6950, 57122, 5901, 7879, 23165, 3840, 80145, 79139, 9688, 10189, 81929, 9631	598	68	9126	3.59079	0.108372	0.000754364	0.0469363
GOTERM_BP_FAT	GO:0044766~multi-organism transport	16	2.51177	2.48818e-05	3837, 7514, 3836, 3838, 6950, 57122, 5901, 7879, 23165, 3840, 80145, 79139, 9688, 10189, 81929, 9631	598	68	9126	3.59079	0.108372	0.000754364	0.0469363
GOTERM_BP_FAT	GO:0009124~nucleoside monophosphate biosynthetic process	17	2.66876	2.4993e-05	3251, 205, 509, 1329, 2618, 7298, 9551, 8833, 10476, 5471, 10606, 7371, 1716, 7083, 517, 10165, 514	598	76	9126	3.41362	0.108829	0.000752782	0.0471459
KEGG_PATHWAY	hsa03013:RNA transport	27	4.23862	2.86332e-05	10460, 10248, 7514, 26019, 55110, 57510, 9669, 80145, 8894, 6613, 9631, 3837, 1965, 96764, 5901, 8087, 57122, 23165, 79897, 9688, 7341, 10557, 10189, 81929, 3646, 11260, 26986	312	143	3995	2.41763	0.00559646	0.00186898	0.0357641
GOTERM_CC_FAT	GO:0044452~nucleolar part	15	2.35479	2.9604e-05	5437, 55759, 10885, 10248, 25926, 1736, 23160, 51602, 79897, 10199, 7341, 5440, 84172, 10557, 84916	602	57	8510	3.72006	0.0221903	0.000640942	0.0451107
GOTERM_BP_FAT	GO:0090263~positive regulation of canonical Wnt signaling pathway	19	2.98273	3.09191e-05	5717, 55737, 5718, 5707, 5682, 5691, 5690, 10213, 9861, 5692, 5695, 5713, 5685, 5701, 5684, 5716, 5688, 23198, 259266	598	94	9126	3.08464	0.132846	0.000925151	0.0583216
GOTERM_BP_FAT	GO:0031577~spindle checkpoint	11	1.72684	3.11281e-05	699, 5347, 332, 10403, 348654, 891, 701, 1063, 7272, 54908, 4085	598	33	9126	5.08696	0.133681	0.000925395	0.0587157
GOTERM_BP_FAT	GO:1902581~multi-organism cellular localization	15	2.35479	3.50031e-05	3837, 3836, 7514, 3838, 57122, 5901, 7879, 23165, 3840, 80145, 79139, 9688, 10189, 81929, 9631	598	62	9126	3.69215	0.149021	0.00103387	0.0660228
GOTERM_BP_FAT	GO:1902583~multi-organism intracellular transport	15	2.35479	3.50031e-05	3837, 3836, 7514, 3838, 57122, 5901, 7879, 23165, 3840, 80145, 79139, 9688, 10189, 81929, 9631	598	62	9126	3.69215	0.149021	0.00103387	0.0660228
GOTERM_BP_FAT	GO:0002474~antigen processing and presentation of peptide antigen via MHC class I	17	2.66876	3.51149e-05	5717, 5718, 5707, 5682, 5691, 5690, 10213, 9861, 5692, 5695, 5713, 5685, 5701, 5684, 5716, 5688, 23198	598	78	9126	3.32609	0.149459	0.00103057	0.0662336
GOTERM_MF_FAT	GO:0016887~ATPase activity	40	6.27943	3.58366e-05	8886, 29028, 9861, 24137, 10694, 9551, 488, 483, 3320, 5984, 9493, 2956, 55605, 10112, 517, 514, 4173, 63979, 4175, 509, 27032, 4436, 3833, 10212, 3832, 7153, 8607, 5983, 5982, 1062, 5701, 3329, 8458, 6059, 11004, 1656, 10476, 9585, 79572, 9188	551	305	8431	2.00672	0.0348915	0.0013145	0.0565406
GOTERM_BP_FAT	GO:0043241~protein complex disassembly	30	4.70958	3.6444e-05	6182, 9801, 126731, 51650, 10247, 56945, 11222, 51534, 51373, 55239, 28977, 28998, 143244, 3925, 6418, 29088, 64960, 54148, 51649, 3396, 55173, 26586, 51642, 6059, 64928, 11004, 57129, 1984, 64951, 29074	598	199	9126	2.30063	0.154654	0.00106279	0.0687396
GOTERM_BP_FAT	GO:1901566~organonitrogen compound biosynthetic process	95	14.9137	3.69441e-05	84300, 27161, 10797, 10247, 11222, 51001, 7298, 51373, 55239, 51629, 191, 9551, 28977, 6169, 8833, 143244, 9791, 4860, 54148, 60386, 10056, 3251, 8872, 205, 1329, 509, 84285, 2617, 2618, 3396, 6059, 79691, 64928, 1615, 10767, 57129, 4830, 10476, 1984, 1716, 9217, 79017, 29074, 6741, 3646, 10165, 2058, 26986, 9801, 6182, 262, 51650, 81034, 56945, 57510, 9669, 5610, 28998, 5464, 2597, 1503, 7371, 1…	598	965	9126	1.50237	0.156601	0.00107059	0.0696827
GOTERM_BP_FAT	GO:0006839~mitochondrial transport	32	5.02355	3.85354e-05	10971, 1869, 81034, 7416, 131474, 9551, 26519, 5534, 9141, 3320, 57380, 87178, 85465, 86, 517, 514, 401505, 1468, 509, 1329, 8607, 63933, 5695, 134266, 9868, 10476, 7534, 29074, 7532, 10165, 23788, 10452	598	220	9126	2.21976	0.162766	0.00110971	0.0726831
GOTERM_CC_FAT	GO:0005635~nuclear envelope	45	7.06436	4.06158e-05	9801, 1434, 7514, 1104, 56943, 10204, 3840, 4001, 92140, 55379, 25909, 143244, 23306, 2597, 51155, 64960, 51514, 9631, 7112, 10885, 3837, 3836, 3838, 10682, 51649, 1063, 5901, 57122, 23165, 4710, 5902, 23560, 1717, 10128, 10553, 27101, 1984, 9688, 7341, 203068, 81929, 4085, 11260, 27000, 11335	602	335	8510	1.89889	0.0303183	0.00085484	0.0618857
GOTERM_BP_FAT	GO:0010565~regulation of cellular ketone metabolic process	20	3.13972	4.28109e-05	5717, 51582, 5718, 5707, 5682, 5160, 5691, 1737, 5690, 10213, 9861, 5692, 5713, 5695, 5685, 5701, 5684, 5716, 5688, 23198	598	105	9126	2.90683	0.179107	0.0012251	0.0807441
GOTERM_BP_FAT	GO:0016925~protein sumoylation	21	3.2967	4.30425e-05	55143, 10054, 3619, 79677, 84733, 7150, 332, 205564, 7153, 57122, 6996, 23165, 51602, 9126, 9688, 7341, 5885, 6613, 5111, 81929, 9631	598	114	9126	2.81121	0.179983	0.00122413	0.0811807
GOTERM_BP_FAT	GO:0038061~NIK/NF-kappaB signaling	18	2.82575	4.54472e-05	5717, 5718, 5707, 5682, 5691, 5690, 10213, 9861, 5692, 5695, 5713, 5610, 5685, 5701, 5684, 5716, 5688, 23198	598	88	9126	3.12154	0.189024	0.00128455	0.0857144
GOTERM_CC_FAT	GO:0099513~polymeric cytoskeletal fiber	50	7.84929	4.81054e-05	29127, 332, 24137, 22974, 10694, 4001, 983, 10615, 9493, 3925, 55605, 9793, 259266, 10808, 3619, 10059, 7283, 23160, 22948, 10376, 9735, 10576, 11004, 1656, 4830, 9585, 4751, 9055, 126731, 51203, 22919, 6950, 6790, 348235, 90417, 5347, 84790, 83658, 10112, 26502, 58477, 7525, 3833, 3832, 27436, 1062, 26586, 10128, 908, 203068	602	390	8510	1.81233	0.035808	0.000985049	0.0732936
GOTERM_CC_FAT	GO:0099512~supramolecular fiber	50	7.84929	4.81054e-05	29127, 332, 24137, 22974, 10694, 4001, 983, 10615, 9493, 3925, 55605, 9793, 259266, 10808, 3619, 10059, 7283, 23160, 22948, 10376, 9735, 10576, 11004, 1656, 4830, 9585, 4751, 9055, 126731, 51203, 22919, 6950, 6790, 348235, 90417, 5347, 84790, 83658, 10112, 26502, 58477, 7525, 3833, 3832, 27436, 1062, 26586, 10128, 908, 203068	602	390	8510	1.81233	0.035808	0.000985049	0.0732936
GOTERM_BP_FAT	GO:0051347~positive regulation of transferase activity	53	8.32025	4.82403e-05	2146, 84930, 7295, 5682, 8767, 9861, 22974, 5685, 5684, 983, 27338, 5984, 701, 1894, 11235, 5747, 10808, 5707, 5691, 5690, 5983, 5982, 5692, 5695, 5701, 5688, 10576, 4751, 9217, 4085, 5717, 5718, 128239, 8106, 6950, 5713, 5610, 5716, 23198, 7334, 54165, 6788, 5347, 11065, 10213, 1736, 3326, 1062, 990, 991, 891, 1163, 1164	598	455	9126	1.77764	0.1994	0.00135514	0.09098
GOTERM_CC_FAT	GO:0030496~midbody	22	3.45369	5.24209e-05	1894, 55143, 129138, 3619, 29127, 332, 1063, 24137, 1062, 5901, 6790, 983, 55165, 9585, 10615, 4751, 5347, 9493, 10112, 7184, 9055, 259266	602	116	8510	2.68101	0.038957	0.00104514	0.0798663
GOTERM_MF_FAT	GO:0004298~threonine-type endopeptidase activity	8	1.25589	5.29158e-05	5688, 5682, 5691, 5690, 5692, 5695, 5685, 5684	551	17	8431	7.2006	0.0510897	0.00187114	0.0834765
GOTERM_MF_FAT	GO:0070003~threonine-type peptidase activity	8	1.25589	5.29158e-05	5688, 5682, 5691, 5690, 5692, 5695, 5685, 5684	551	17	8431	7.2006	0.0510897	0.00187114	0.0834765
GOTERM_BP_FAT	GO:1904851~positive regulation of establishment of protein localization to telomere	6	0.941915	5.59124e-05	10576, 908, 1736, 6950, 22948, 10694	598	8	9126	11.4457	0.227222	0.00156098	0.105442
GOTERM_BP_FAT	GO:0009896~positive regulation of catabolic process	36	5.65149	5.83869e-05	5717, 84300, 5718, 27161, 5682, 9861, 5713, 5685, 4898, 5684, 6790, 5716, 983, 23198, 87178, 7336, 5347, 701, 6613, 55737, 5747, 11065, 5707, 5691, 5690, 10213, 5692, 5695, 5701, 7879, 5688, 7341, 991, 891, 4085, 26986	598	267	9126	2.05765	0.235988	0.0016202	0.110106
GOTERM_BP_FAT	GO:0090068~positive regulation of cell cycle process	27	4.23862	5.9556e-05	81610, 1869, 29127, 51203, 113130, 332, 348654, 10403, 983, 9700, 6790, 9493, 83695, 5885, 5111, 1894, 11065, 4869, 1017, 11113, 5902, 2237, 9585, 990, 891, 9787, 4085	598	174	9126	2.36807	0.240095	0.00164273	0.11231
GOTERM_BP_FAT	GO:0051225~spindle assembly	16	2.51177	6.01098e-05	126731, 3837, 29127, 3833, 332, 3832, 1104, 22974, 24137, 6790, 4605, 4751, 5347, 9493, 203068, 259266	598	73	9126	3.34485	0.242032	0.00164813	0.113354
GOTERM_MF_FAT	GO:0043021~ribonucleoprotein complex binding	19	2.98273	6.06211e-05	2146, 6626, 6637, 6629, 55759, 4869, 6633, 58477, 1965, 3396, 6059, 8260, 143244, 4528, 4830, 1984, 6632, 6631, 80155	551	99	8431	2.93661	0.0583083	0.00206949	0.0956264
GOTERM_BP_FAT	GO:0051640~organelle localization	43	6.75039	6.28803e-05	55726, 81610, 29899, 10342, 7514, 113130, 51203, 332, 10403, 54908, 488, 10959, 9700, 6790, 55165, 10615, 9493, 259266, 55143, 5747, 11235, 8409, 84946, 3837, 23212, 10059, 5194, 3833, 23160, 1063, 1062, 5901, 6059, 10128, 11004, 10097, 4976, 375, 10096, 7534, 891, 9787, 81929	598	345	9126	1.90208	0.251652	0.00171384	0.118575
GOTERM_CC_FAT	GO:0005681~spliceosomal complex	27	4.23862	6.83357e-05	6637, 988, 6636, 6633, 55110, 25804, 10713, 84844, 8896, 6626, 6627, 6629, 6009, 10212, 57819, 10492, 23450, 51645, 10907, 8458, 22913, 10285, 6632, 10189, 6631, 26986, 6426	602	163	8510	2.34158	0.0504815	0.00132733	0.104102
GOTERM_BP_FAT	GO:0006414~translational elongation	22	3.45369	6.8907e-05	6182, 9801, 51650, 56945, 11222, 51373, 51649, 3396, 55173, 51642, 28977, 28998, 143244, 64928, 10767, 57129, 1984, 29088, 64951, 64960, 29074, 54148	598	127	9126	2.64362	0.272159	0.00186691	0.129933
GOTERM_BP_FAT	GO:0071826~ribonucleoprotein complex subunit organization	29	4.55259	7.09781e-05	6637, 27161, 6636, 6633, 51001, 55239, 219988, 55164, 6169, 9790, 25804, 79084, 84154, 10713, 8872, 4869, 55299, 51388, 8607, 96764, 10907, 10767, 4528, 1656, 6632, 5433, 6631, 3646, 6426	598	196	9126	2.25799	0.279075	0.00191174	0.133836
GOTERM_BP_FAT	GO:1902850~microtubule cytoskeleton organization involved in mitosis	11	1.72684	7.14844e-05	10460, 4605, 3837, 29127, 9493, 4751, 3833, 332, 3832, 24137, 22974	598	36	9126	4.66304	0.280756	0.00191418	0.13479
GOTERM_CC_FAT	GO:0000780~condensed nuclear chromosome, centromeric region	7	1.0989	7.73747e-05	699, 5347, 10403, 891, 701, 6790, 79980	602	12	8510	8.24612	0.0569654	0.00146523	0.117864
GOTERM_CC_FAT	GO:0005838~proteasome regulatory particle	9	1.41287	7.76854e-05	5717, 5718, 5707, 10213, 9861, 5713, 7979, 5701, 5716	602	22	8510	5.783	0.0571875	0.00143526	0.118337
GOTERM_BP_FAT	GO:1901988~negative regulation of cell cycle phase transition	23	3.61068	8.21034e-05	55215, 2146, 988, 8883, 1869, 890, 699, 11073, 4869, 55159, 1017, 10403, 348654, 1063, 6790, 983, 5347, 701, 891, 7272, 5111, 5591, 4085	598	138	9126	2.54348	0.31512	0.00218554	0.154798
GOTERM_BP_FAT	GO:0051656~establishment of organelle localization	38	5.96546	8.60515e-05	81610, 29899, 10342, 7514, 113130, 51203, 332, 10403, 54908, 488, 10959, 9700, 55165, 10615, 9493, 55143, 5747, 11235, 8409, 84946, 3837, 23212, 3833, 23160, 1063, 1062, 5901, 6059, 10128, 11004, 10097, 4976, 375, 10096, 7534, 9787, 891, 81929	598	294	9126	1.97249	0.327474	0.00227737	0.162236
GOTERM_CC_FAT	GO:0005761~mitochondrial ribosome	17	2.66876	8.75956e-05	9801, 6182, 51650, 56945, 11222, 51373, 3396, 51642, 28977, 28998, 64928, 57129, 29088, 64951, 64960, 29074, 54148	602	78	8510	3.08097	0.0642439	0.00157971	0.133423
GOTERM_CC_FAT	GO:0000313~organellar ribosome	17	2.66876	8.75956e-05	9801, 6182, 51650, 56945, 11222, 51373, 3396, 51642, 28977, 28998, 64928, 57129, 29088, 64951, 64960, 29074, 54148	602	78	8510	3.08097	0.0642439	0.00157971	0.133423
GOTERM_BP_FAT	GO:0045930~negative regulation of mitotic cell cycle	27	4.23862	8.78909e-05	55215, 2146, 11130, 8883, 1869, 11073, 55159, 10403, 348654, 6790, 983, 5347, 701, 7272, 5111, 890, 699, 4869, 1017, 4436, 7153, 1063, 9735, 55055, 891, 5591, 4085	598	178	9126	2.31485	0.333153	0.00231272	0.165701
GOTERM_BP_FAT	GO:0006997~nucleus organization	21	3.2967	9.11045e-05	6732, 55726, 3148, 9221, 57122, 10204, 7443, 23165, 983, 8815, 55165, 25909, 9133, 23198, 9688, 7341, 5347, 84172, 891, 81929, 9631	598	120	9126	2.67065	0.34296	0.00238358	0.171755
GOTERM_BP_FAT	GO:1901991~negative regulation of mitotic cell cycle phase transition	22	3.45369	9.75756e-05	55215, 2146, 8883, 1869, 890, 699, 11073, 55159, 4869, 1017, 10403, 348654, 1063, 6790, 983, 5347, 701, 891, 7272, 5111, 5591, 4085	598	130	9126	2.58261	0.362273	0.00253827	0.183944
GOTERM_BP_FAT	GO:0008380~RNA splicing	42	6.59341	0.000101838	5437, 988, 6637, 6636, 6633, 51001, 5439, 8106, 55110, 51692, 80145, 25804, 10199, 1994, 79084, 5440, 3191, 10713, 8896, 84844, 79005, 6626, 6627, 6732, 6629, 10212, 57819, 10492, 23450, 96764, 51645, 10907, 8458, 22913, 10285, 54845, 6632, 5433, 10189, 6631, 26986, 6426	598	341	9126	1.87964	0.374684	0.00263415	0.191972
GOTERM_BP_FAT	GO:0000375~RNA splicing, via transesterification reactions	35	5.49451	0.000105229	5437, 6637, 988, 6636, 6633, 5439, 8106, 51692, 25804, 10199, 1994, 79084, 5440, 3191, 10713, 8896, 84844, 6626, 6627, 6629, 10212, 57819, 10492, 23450, 96764, 51645, 10907, 22913, 10285, 6632, 5433, 10189, 6631, 26986, 6426	598	264	9126	2.02322	0.384384	0.00270656	0.198358
GOTERM_CC_FAT	GO:0005876~spindle microtubule	13	2.04082	0.00011275	126731, 7283, 51203, 332, 3832, 24137, 9735, 983, 6790, 348235, 10615, 5347, 9055	602	49	8510	3.75042	0.0819189	0.00198569	0.171708
GOTERM_BP_FAT	GO:0009894~regulation of catabolic process	47	7.37834	0.000115019	5717, 84300, 5718, 81610, 27161, 7514, 5682, 9861, 51377, 5713, 5685, 4898, 5684, 983, 6790, 5716, 23198, 87178, 5347, 7336, 701, 5886, 6613, 51582, 55737, 5747, 55872, 11065, 79031, 5707, 5691, 5690, 10213, 5692, 23450, 5695, 3326, 5701, 7879, 5688, 10128, 991, 5500, 7341, 891, 4085, 26986	598	400	9126	1.79315	0.411554	0.00294161	0.216794
GOTERM_MF_FAT	GO:0070990~snRNP binding	6	0.941915	0.000117317	6626, 6637, 6629, 6633, 6632, 6631	551	9	8431	10.2008	0.109763	0.0038681	0.184984
GOTERM_BP_FAT	GO:0070203~regulation of establishment of protein localization to telomere	6	0.941915	0.00011903	10576, 908, 1736, 6950, 22948, 10694	598	9	9126	10.1739	0.422336	0.00302725	0.224346
GOTERM_BP_FAT	GO:0006518~peptide metabolic process	67	10.5181	0.000120571	84300, 27161, 10247, 11222, 51001, 51373, 55239, 51629, 6169, 28977, 143244, 54148, 60386, 10056, 8872, 84285, 2617, 3396, 6059, 64928, 1615, 10767, 57129, 1984, 79017, 29074, 10165, 3646, 6741, 2058, 26986, 9801, 6182, 51650, 81034, 56945, 57510, 9669, 5610, 28998, 5464, 2597, 1994, 4677, 64960, 29088, 8894, 1468, 8565, 2730, 4869, 3735, 51649, 1965, 10492, 55173, 5901, 8087, 10987, 51642, 2739,…	598	641	9126	1.59513	0.426424	0.00304954	0.227247
GOTERM_BP_FAT	GO:0044085~cellular component biogenesis	174	27.3155	0.000121694	29796, 10342, 3148, 29127, 51001, 6873, 332, 1104, 55239, 22974, 10694, 6169, 6491, 79682, 27338, 87178, 79084, 3925, 6418, 23076, 79080, 10713, 1894, 8872, 5747, 4312, 55759, 84946, 7283, 8027, 55856, 23450, 5036, 7879, 10907, 10471, 9735, 79897, 4605, 1615, 7411, 10097, 10096, 7341, 4694, 8208, 4839, 54539, 55723, 126731, 84294, 51491, 81611, 7514, 22919, 6950, 7417, 55164, 5610, 9221, 92140, 2…	598	2068	9126	1.28404	0.429387	0.00306112	0.229362
GOTERM_BP_FAT	GO:0090502~RNA phosphodiester bond hydrolysis, endonucleolytic	13	2.04082	0.000122709	84294, 51110, 10248, 27161, 10247, 23212, 10535, 51692, 9790, 79897, 2237, 10557, 9156	598	53	9126	3.74323	0.43205	0.00306985	0.231272
GOTERM_BP_FAT	GO:0075733~intracellular transport of virus	14	2.1978	0.000125089	79139, 80145, 3837, 7514, 3836, 9688, 3838, 10189, 81929, 5901, 57122, 3840, 23165, 9631	598	61	9126	3.50249	0.438249	0.00311242	0.235753
GOTERM_BP_FAT	GO:1990542~mitochondrial transmembrane transport	14	2.1978	0.000125089	509, 1329, 63933, 131474, 9551, 26519, 9141, 134266, 57380, 3320, 10476, 517, 10452, 514	598	61	9126	3.50249	0.438249	0.00311242	0.235753
GOTERM_BP_FAT	GO:0071427~mRNA-containing ribonucleoprotein complex export from nucleus	18	2.82575	0.000141469	26019, 10212, 8106, 56943, 7979, 57122, 23165, 51692, 7884, 80145, 84248, 9688, 1984, 5433, 10189, 81929, 6426, 9631	598	96	9126	2.86141	0.479111	0.00350041	0.266585
GOTERM_BP_FAT	GO:0006406~mRNA export from nucleus	18	2.82575	0.000141469	26019, 10212, 8106, 56943, 7979, 57122, 23165, 51692, 7884, 80145, 84248, 9688, 1984, 5433, 10189, 81929, 6426, 9631	598	96	9126	2.86141	0.479111	0.00350041	0.266585
GOTERM_CC_FAT	GO:0098800~inner mitochondrial membrane protein complex	20	3.13972	0.000154044	54539, 9377, 29796, 509, 1329, 4702, 4715, 9551, 4710, 26519, 7381, 54927, 134266, 79135, 10476, 1337, 4694, 7388, 517, 514	602	107	8510	2.64228	0.110214	0.00265044	0.234525
GOTERM_CC_FAT	GO:0030532~small nuclear ribonucleoprotein complex	14	2.1978	0.000156024	6626, 6627, 6637, 6629, 6636, 6633, 57819, 23450, 96764, 10907, 25804, 6632, 6631, 84844	602	58	8510	3.41219	0.111549	0.0026249	0.237537
GOTERM_CC_FAT	GO:0005739~mitochondrion	123	19.3093	0.00016083	29796, 10797, 7295, 10549, 51001, 5160, 7298, 51373, 7296, 131474, 51629, 39, 3336, 9551, 4898, 5534, 55379, 87178, 9650, 11321, 157378, 60386, 205, 1329, 51012, 4190, 63933, 55856, 5033, 79691, 64928, 54927, 9868, 4830, 10476, 1716, 4694, 10165, 23788, 9801, 6182, 54539, 51204, 81034, 7416, 7417, 28998, 54931, 55526, 29088, 517, 514, 55737, 401505, 9377, 1468, 51110, 3735, 55173, 3326, 5052, 332…	602	1275	8510	1.36373	0.11478	0.0026469	0.244845
GOTERM_BP_FAT	GO:0072521~purine-containing compound metabolic process	42	6.59341	0.000169791	262, 84300, 54539, 29796, 5230, 4702, 191, 9551, 8833, 7167, 2597, 4860, 55526, 1349, 517, 514, 63979, 9377, 3251, 1340, 205, 1329, 509, 10059, 2618, 11164, 4436, 4715, 2778, 4710, 54205, 7381, 3939, 10476, 4830, 5471, 10606, 1716, 1337, 7388, 4694, 10165	598	349	9126	1.83655	0.542876	0.00417736	0.319873
GOTERM_CC_FAT	GO:0000778~condensed nuclear chromosome kinetochore	6	0.941915	0.000171437	699, 5347, 10403, 891, 701, 79980	602	9	8510	9.42414	0.12187	0.0027613	0.260973
GOTERM_BP_FAT	GO:0006458~'de novo' protein folding	8	1.25589	0.00018102	10576, 10808, 131474, 51182, 30001, 3336, 3329, 27000	598	20	9126	6.10435	0.565942	0.00442941	0.340995
GOTERM_BP_FAT	GO:0009163~nucleoside biosynthetic process	18	2.82575	0.000183617	262, 3251, 205, 509, 1329, 79031, 7298, 9551, 8833, 79691, 4830, 10476, 1503, 7371, 7083, 517, 10165, 514	598	98	9126	2.80302	0.57111	0.00446911	0.345879
GOTERM_BP_FAT	GO:0019882~antigen processing and presentation	25	3.92465	0.000191045	5717, 5718, 29127, 5707, 5682, 5691, 10213, 3832, 5690, 9861, 5692, 5713, 24137, 1062, 5695, 5685, 5701, 5684, 7879, 5716, 5688, 11004, 23198, 375, 9493	598	166	9126	2.29832	0.58555	0.00462508	0.359847
GOTERM_BP_FAT	GO:0033046~negative regulation of sister chromatid segregation	10	1.56986	0.000192215	699, 5347, 10403, 348654, 891, 701, 1063, 7272, 4085, 9700	598	33	9126	4.62451	0.58778	0.00462903	0.362048
GOTERM_BP_FAT	GO:0051985~negative regulation of chromosome segregation	10	1.56986	0.000192215	699, 5347, 10403, 348654, 891, 701, 1063, 7272, 4085, 9700	598	33	9126	4.62451	0.58778	0.00462903	0.362048
GOTERM_BP_FAT	GO:0022618~ribonucleoprotein complex assembly	27	4.23862	0.000199797	6637, 27161, 6636, 6633, 51001, 55239, 219988, 55164, 6169, 9790, 25804, 79084, 84154, 10713, 8872, 4869, 55299, 8607, 51388, 96764, 10907, 1656, 6632, 5433, 6631, 3646, 6426	598	187	9126	2.20344	0.601941	0.00478619	0.376302
GOTERM_BP_FAT	GO:0016032~viral process	76	11.9309	0.00020134	5437, 51534, 5439, 7298, 1104, 5478, 5685, 5684, 6169, 80145, 79682, 6418, 3925, 5440, 2956, 79080, 6921, 5886, 6780, 6732, 4312, 5691, 22944, 5690, 23471, 5692, 5695, 22948, 57122, 5701, 23165, 7879, 6059, 5688, 375, 1656, 8453, 9688, 7341, 9217, 6741, 26986, 51497, 7514, 51193, 8106, 7416, 5610, 3840, 8815, 7874, 9631, 3837, 890, 699, 79031, 3836, 4869, 7150, 3735, 3838, 54442, 7153, 10492, 301…	598	765	9126	1.51611	0.604763	0.00479813	0.379202
GOTERM_BP_FAT	GO:0006163~purine nucleotide metabolic process	40	6.27943	0.000201691	84300, 54539, 29796, 5230, 4702, 9551, 8833, 7167, 2597, 4860, 55526, 1349, 517, 514, 63979, 9377, 3251, 1340, 205, 1329, 509, 10059, 2618, 11164, 4436, 4715, 2778, 4710, 54205, 7381, 3939, 10476, 4830, 5471, 10606, 1716, 1337, 7388, 4694, 10165	598	329	9126	1.85542	0.605402	0.00478177	0.379863
GOTERM_BP_FAT	GO:1901659~glycosyl compound biosynthetic process	18	2.82575	0.000208526	262, 3251, 205, 509, 1329, 79031, 7298, 9551, 8833, 79691, 4830, 10476, 1503, 7371, 7083, 517, 10165, 514	598	99	9126	2.7747	0.617645	0.00491815	0.392712
GOTERM_BP_FAT	GO:0046794~transport of virus	14	2.1978	0.00020876	79139, 80145, 3837, 7514, 3836, 9688, 3838, 10189, 81929, 5901, 57122, 3840, 23165, 9631	598	64	9126	3.33832	0.618057	0.00489859	0.393152
GOTERM_CC_FAT	GO:0022624~proteasome accessory complex	9	1.41287	0.000217364	5717, 5718, 5707, 10213, 9861, 5713, 7979, 5701, 5716	602	25	8510	5.08904	0.151919	0.00342702	0.330777
GOTERM_BP_FAT	GO:0070202~regulation of establishment of protein localization to chromosome	6	0.941915	0.000225266	10576, 908, 1736, 6950, 22948, 10694	598	10	9126	9.15652	0.646047	0.00525816	0.424174
GOTERM_BP_FAT	GO:0033044~regulation of chromosome organization	31	4.86656	0.000229164	10460, 113130, 10403, 348654, 29028, 6950, 10694, 9700, 7334, 6418, 5347, 29128, 5885, 701, 7272, 7874, 11065, 699, 1736, 1063, 22948, 1062, 10576, 908, 2237, 990, 4288, 4751, 891, 9787, 4085	598	231	9126	2.048	0.652353	0.00532198	0.431499
GOTERM_BP_FAT	GO:0007077~mitotic nuclear envelope disassembly	11	1.72684	0.000234186	8815, 9133, 9688, 5347, 891, 81929, 57122, 23165, 7443, 9631, 983	598	41	9126	4.09438	0.66031	0.00541105	0.440935
GOTERM_BP_FAT	GO:0044764~multi-organism cellular process	76	11.9309	0.000237804	5437, 51534, 5439, 7298, 1104, 5478, 5685, 5684, 6169, 80145, 79682, 6418, 3925, 5440, 2956, 79080, 6921, 5886, 6780, 6732, 4312, 5691, 22944, 5690, 23471, 5692, 5695, 22948, 57122, 5701, 23165, 7879, 6059, 5688, 375, 1656, 8453, 9688, 7341, 9217, 6741, 26986, 51497, 7514, 51193, 8106, 7416, 5610, 3840, 8815, 7874, 9631, 3837, 890, 699, 79031, 3836, 4869, 7150, 3735, 3838, 54442, 7153, 10492, 301…	598	770	9126	1.50627	0.665931	0.00546704	0.447734
GOTERM_MF_FAT	GO:0042393~histone binding	21	3.2967	0.000240077	55723, 81611, 5757, 4869, 84733, 54892, 1104, 29028, 3014, 9918, 7443, 4171, 23198, 6418, 29128, 2956, 55355, 8208, 1163, 1164, 27000	551	129	8431	2.4909	0.211754	0.00764626	0.378206
GOTERM_BP_FAT	GO:0051305~chromosome movement towards spindle pole	5	0.784929	0.000244592	3837, 10097, 10096, 9787, 1062	598	6	9126	12.7174	0.676225	0.00559477	0.460486
GOTERM_BP_FAT	GO:0051054~positive regulation of DNA metabolic process	23	3.61068	0.000258095	79184, 4869, 1017, 7153, 2305, 5983, 1736, 6950, 5982, 22948, 3014, 10694, 983, 10576, 1054, 908, 27101, 7334, 5984, 7336, 4751, 2956, 5111	598	149	9126	2.3557	0.69577	0.00587362	0.485849
GOTERM_BP_FAT	GO:0044403~symbiosis, encompassing mutualism through parasitism	77	12.0879	0.000260733	5437, 51534, 5439, 7298, 1104, 5478, 5685, 5684, 6169, 80145, 79682, 6418, 3925, 5440, 2956, 79080, 6921, 5886, 6780, 6732, 4312, 5691, 22944, 5690, 23471, 5692, 5695, 22948, 57122, 5701, 23165, 7879, 6059, 5688, 375, 1656, 8453, 9688, 7341, 9217, 6741, 26986, 51497, 7514, 51193, 8106, 7416, 6950, 5610, 3840, 8815, 7874, 9631, 3837, 890, 699, 79031, 3836, 4869, 7150, 3735, 3838, 54442, 7153, 1049…	598	784	9126	1.49884	0.699449	0.00590436	0.490804
GOTERM_BP_FAT	GO:0044419~interspecies interaction between organisms	77	12.0879	0.000260733	5437, 51534, 5439, 7298, 1104, 5478, 5685, 5684, 6169, 80145, 79682, 6418, 3925, 5440, 2956, 79080, 6921, 5886, 6780, 6732, 4312, 5691, 22944, 5690, 23471, 5692, 5695, 22948, 57122, 5701, 23165, 7879, 6059, 5688, 375, 1656, 8453, 9688, 7341, 9217, 6741, 26986, 51497, 7514, 51193, 8106, 7416, 6950, 5610, 3840, 8815, 7874, 9631, 3837, 890, 699, 79031, 3836, 4869, 7150, 3735, 3838, 54442, 7153, 1049…	598	784	9126	1.49884	0.699449	0.00590436	0.490804
GOTERM_BP_FAT	GO:0009259~ribonucleotide metabolic process	39	6.12245	0.000266676	84300, 54539, 29796, 5230, 4702, 9551, 8833, 7167, 2597, 1503, 7371, 55526, 1349, 517, 514, 63979, 9377, 3251, 1340, 205, 1329, 509, 2618, 11164, 4436, 4715, 2778, 4710, 54205, 7381, 3939, 10476, 4830, 5471, 10606, 1337, 7388, 4694, 10165	598	322	9126	1.84837	0.707573	0.00600903	0.501964
GOTERM_BP_FAT	GO:0000082~G1/S transition of mitotic cell cycle	26	4.08163	0.000268029	2146, 4173, 4175, 1869, 81620, 4869, 55159, 113130, 128239, 7298, 1017, 6241, 1104, 5902, 4171, 6790, 983, 10926, 9134, 8453, 5471, 990, 891, 5111, 5591, 84515	598	180	9126	2.20435	0.709391	0.00601005	0.504504
GOTERM_BP_FAT	GO:0033209~tumor necrosis factor-mediated signaling pathway	17	2.66876	0.000273631	5717, 5718, 5707, 5682, 5691, 5690, 10213, 9861, 5692, 5695, 5713, 5685, 5701, 5684, 5716, 5688, 23198	598	92	9126	2.81994	0.716803	0.00610561	0.515023
GOTERM_BP_FAT	GO:0019693~ribose phosphate metabolic process	40	6.27943	0.000277828	84300, 54539, 6120, 29796, 5230, 4702, 9551, 8833, 7167, 2597, 1503, 7371, 55526, 1349, 517, 514, 63979, 9377, 3251, 1340, 205, 1329, 509, 2618, 11164, 4436, 4715, 2778, 4710, 54205, 7381, 3939, 10476, 4830, 5471, 10606, 1337, 7388, 4694, 10165	598	334	9126	1.82765	0.72223	0.00616912	0.522902
GOTERM_CC_FAT	GO:0051233~spindle midzone	8	1.25589	0.000291017	55143, 9585, 29127, 990, 5347, 701, 1062, 6790	602	20	8510	5.65449	0.197981	0.00449239	0.442628
GOTERM_BP_FAT	GO:0010948~negative regulation of cell cycle process	26	4.08163	0.000292311	55215, 2146, 988, 8883, 1869, 11073, 55159, 10403, 348654, 6790, 983, 9700, 9126, 5347, 701, 7272, 5111, 890, 699, 4869, 1017, 4436, 1063, 891, 5591, 4085	598	181	9126	2.19217	0.740175	0.00645861	0.55009
GOTERM_BP_FAT	GO:0006397~mRNA processing	45	7.06436	0.000293594	5437, 988, 6637, 6636, 6633, 5439, 8106, 55110, 51692, 80145, 25804, 87178, 1994, 79084, 5440, 3191, 10713, 8896, 84844, 79005, 6626, 6627, 6732, 6629, 55149, 22944, 10212, 57819, 10492, 23450, 96764, 51645, 10907, 8458, 7884, 22913, 10285, 54845, 891, 6632, 5433, 10189, 6631, 26986, 6426	598	393	9126	1.74743	0.741709	0.00645595	0.552499
GOTERM_BP_FAT	GO:0060071~Wnt signaling pathway, planar cell polarity pathway	17	2.66876	0.000310938	5717, 5718, 5707, 5682, 5691, 5690, 10213, 9861, 5692, 5695, 5713, 5685, 5701, 5684, 5716, 5688, 23198	598	93	9126	2.78962	0.761562	0.00680364	0.585047
GOTERM_BP_FAT	GO:0033554~cellular response to stress	119	18.6813	0.000312096	2146, 5437, 10130, 84930, 3148, 7295, 5439, 51377, 488, 87178, 5440, 29128, 2956, 6613, 116028, 26973, 1894, 6780, 10808, 10535, 7341, 8208, 10728, 9156, 55215, 113130, 9768, 348654, 5610, 23198, 7334, 3320, 7335, 7336, 5347, 2175, 29089, 83695, 2177, 7184, 84515, 6745, 51514, 9631, 7528, 890, 55872, 58477, 10212, 4436, 10213, 2305, 3326, 3014, 5052, 9232, 79139, 27102, 891, 5433, 10189, 27000, 7…	598	1343	9126	1.35223	0.762832	0.00679665	0.58722
GOTERM_BP_FAT	GO:0090307~mitotic spindle assembly	10	1.56986	0.000312801	4605, 3837, 29127, 9493, 4751, 3833, 332, 3832, 24137, 22974	598	35	9126	4.36025	0.763602	0.00677992	0.588542
GOTERM_BP_FAT	GO:0071897~DNA biosynthetic process	23	3.61068	0.000312935	7298, 9768, 5983, 1736, 5478, 54108, 6950, 5982, 1063, 22948, 10694, 10576, 908, 9100, 5984, 4751, 7083, 5111, 10728, 116028, 9156, 27000, 51514	598	151	9126	2.3245	0.763747	0.00675107	0.588793
GOTERM_BP_FAT	GO:0051649~establishment of localization in cell	130	20.4082	0.000316982	10342, 7295, 332, 10403, 131474, 10204, 54908, 9551, 488, 5534, 6169, 9141, 10615, 63893, 6418, 85465, 11321, 1894, 5747, 129138, 8409, 84946, 1329, 8027, 23471, 7879, 7884, 11004, 9868, 10097, 10476, 10096, 1984, 116150, 81610, 11130, 1434, 81611, 7514, 51203, 113130, 8106, 3840, 51692, 55165, 3320, 84790, 517, 7184, 6745, 514, 9631, 55737, 401505, 3837, 3836, 58477, 3838, 10212, 3833, 2778, 106…	598	1493	9126	1.32881	0.768116	0.00680626	0.596387
GOTERM_CC_FAT	GO:0042555~MCM complex	6	0.941915	0.000322988	4173, 4175, 253714, 79892, 84515, 4171	602	10	8510	8.48173	0.21719	0.00488532	0.491144
GOTERM_CC_FAT	GO:0071013~catalytic step 2 spliceosome	17	2.66876	0.000332798	6627, 6637, 988, 6629, 6636, 6633, 57819, 10492, 55110, 23450, 51645, 22913, 6632, 10189, 84844, 26986, 6426	602	87	8510	2.76225	0.222991	0.0049349	0.506026
GOTERM_MF_FAT	GO:0003777~microtubule motor activity	11	1.72684	0.000346595	11004, 9585, 9126, 9493, 3833, 3832, 83658, 55605, 10112, 1062, 24137	551	43	8431	3.91428	0.290741	0.0106781	0.54558
GOTERM_BP_FAT	GO:0006270~DNA replication initiation	8	1.25589	0.000354959	4173, 4175, 9134, 11073, 990, 1017, 51659, 4171	598	22	9126	5.54941	0.805369	0.00758343	0.667613
GOTERM_CC_FAT	GO:0030684~preribosome	15	2.35479	0.000368956	84294, 10885, 84946, 55759, 23212, 51388, 51118, 9790, 51602, 54663, 25879, 10199, 84319, 23076, 79080	602	71	8510	2.98652	0.244005	0.00536479	0.56086
GOTERM_BP_FAT	GO:0000077~DNA damage checkpoint	20	3.13972	0.000373985	55215, 79184, 988, 1869, 890, 11073, 4869, 55159, 1017, 4436, 3014, 6790, 983, 5347, 83695, 891, 5111, 261726, 5591, 51514	598	123	9126	2.48144	0.821719	0.00795152	0.703277
GOTERM_BP_FAT	GO:0006302~double-strand break repair	21	3.2967	0.000380585	79184, 63979, 9319, 7528, 79677, 113130, 4436, 10213, 348654, 2305, 51659, 3014, 7979, 253714, 2237, 7334, 7341, 7336, 5885, 5591, 84515	598	133	9126	2.40961	0.827064	0.00805417	0.715647
GOTERM_BP_FAT	GO:0000398~mRNA splicing, via spliceosome	33	5.18053	0.000382726	5437, 6637, 988, 6636, 6633, 5439, 8106, 51692, 25804, 1994, 79084, 5440, 3191, 10713, 8896, 84844, 6626, 6627, 6629, 10212, 57819, 10492, 23450, 96764, 51645, 10907, 22913, 6632, 5433, 10189, 6631, 26986, 6426	598	260	9126	1.93696	0.828763	0.0080623	0.719659
GOTERM_BP_FAT	GO:0000377~RNA splicing, via transesterification reactions with bulged adenosine as nucleophile	33	5.18053	0.000382726	5437, 6637, 988, 6636, 6633, 5439, 8106, 51692, 25804, 1994, 79084, 5440, 3191, 10713, 8896, 84844, 6626, 6627, 6629, 10212, 57819, 10492, 23450, 96764, 51645, 10907, 22913, 6632, 5433, 10189, 6631, 26986, 6426	598	260	9126	1.93696	0.828763	0.0080623	0.719659
GOTERM_BP_FAT	GO:0051988~regulation of attachment of spindle microtubules to kinetochore	6	0.941915	0.000390826	1894, 90417, 29127, 10615, 4751, 891	598	11	9126	8.32411	0.835041	0.00819482	0.734836
GOTERM_BP_FAT	GO:1904816~positive regulation of protein localization to chromosome, telomeric region	6	0.941915	0.000390826	10576, 908, 1736, 6950, 22948, 10694	598	11	9126	8.32411	0.835041	0.00819482	0.734836
KEGG_PATHWAY	hsa04114:Oocyte meiosis	17	2.66876	0.000391083	10971, 699, 1017, 9232, 6790, 983, 5534, 9700, 9134, 5529, 9126, 5500, 991, 5347, 7534, 7532, 4085	312	81	3995	2.68736	0.0738021	0.0189843	0.487464
GOTERM_BP_FAT	GO:0044843~cell cycle G1/S phase transition	27	4.23862	0.000391125	2146, 81610, 1869, 55159, 113130, 7298, 128239, 6241, 1104, 6790, 983, 10926, 5111, 84515, 4173, 4175, 81620, 4869, 1017, 5902, 4171, 9134, 8453, 5471, 990, 891, 5591	598	195	9126	2.11304	0.835268	0.00816394	0.735396
GOTERM_BP_FAT	GO:0009156~ribonucleoside monophosphate biosynthetic process	14	2.1978	0.000391565	3251, 205, 509, 1329, 2618, 9551, 8833, 5471, 10476, 10606, 7371, 517, 10165, 514	598	68	9126	3.14194	0.835602	0.00813626	0.736221
GOTERM_BP_FAT	GO:0045862~positive regulation of proteolysis	36	5.65149	0.000392491	5717, 5718, 5682, 9861, 5713, 5685, 4898, 3336, 5684, 27166, 6790, 5716, 983, 9141, 23198, 5347, 7336, 701, 6613, 5747, 11065, 5707, 5691, 5690, 10213, 5692, 5695, 5701, 3329, 5688, 54205, 7341, 991, 3066, 891, 4085	598	294	9126	1.86868	0.836303	0.00811884	0.737956
GOTERM_BP_FAT	GO:0071174~mitotic spindle checkpoint	9	1.41287	0.000401566	699, 5347, 10403, 348654, 891, 701, 1063, 7272, 4085	598	29	9126	4.73613	0.843013	0.00826872	0.754957
GOTERM_BP_FAT	GO:2000816~negative regulation of mitotic sister chromatid separation	9	1.41287	0.000401566	699, 5347, 10403, 348654, 891, 701, 1063, 7272, 4085	598	29	9126	4.73613	0.843013	0.00826872	0.754957
GOTERM_BP_FAT	GO:0045841~negative regulation of mitotic metaphase/anaphase transition	9	1.41287	0.000401566	699, 5347, 10403, 348654, 891, 701, 1063, 7272, 4085	598	29	9126	4.73613	0.843013	0.00826872	0.754957
GOTERM_BP_FAT	GO:1902100~negative regulation of metaphase/anaphase transition of cell cycle	9	1.41287	0.000401566	699, 5347, 10403, 348654, 891, 701, 1063, 7272, 4085	598	29	9126	4.73613	0.843013	0.00826872	0.754957
KEGG_PATHWAY	hsa03030:DNA replication	10	1.56986	0.000405792	4173, 4175, 2237, 5984, 10535, 5983, 5111, 5982, 6742, 4171	312	31	3995	4.13048	0.0764695	0.0157844	0.505755
GOTERM_BP_FAT	GO:0006119~oxidative phosphorylation	16	2.51177	0.00040807	54539, 9377, 29796, 1340, 509, 1329, 4436, 4702, 4715, 4710, 7381, 54205, 1349, 1337, 4694, 7388	598	86	9126	2.83923	0.847651	0.00836475	0.76714
GOTERM_BP_FAT	GO:0009127~purine nucleoside monophosphate biosynthetic process	13	2.04082	0.000422585	3251, 205, 509, 1329, 2618, 9551, 8833, 5471, 10476, 10606, 517, 10165, 514	598	60	9126	3.30652	0.857517	0.00862274	0.794325
GOTERM_BP_FAT	GO:0009168~purine ribonucleoside monophosphate biosynthetic process	13	2.04082	0.000422585	3251, 205, 509, 1329, 2618, 9551, 8833, 5471, 10476, 10606, 517, 10165, 514	598	60	9126	3.30652	0.857517	0.00862274	0.794325
GOTERM_BP_FAT	GO:0000725~recombinational repair	12	1.88383	0.000439797	7528, 2237, 253714, 7334, 79677, 10213, 348654, 83695, 51659, 3014, 7979, 84515	598	52	9126	3.52174	0.86839	0.00893292	0.826552
[truncated: 15,225 more rows]
