# Supplementary material for: tRNA Fragments Show Intertwining with mRNAs of Specific Repeat Content and Have Links to Disparities
Source: Oxford University Press journal article supplement (doi:10.1158/0008-5472.can-19-0789), 2019-04-17
Supplement: 00085472can190789-sup-218537_1_supp_5440141_ppyclx.xlsx [file 00085472can190789-sup-218537_1_supp_5440141_ppyclx.xlsx]

## Sheet: S9
Supplementary Table S9: Density of repeat elements in the genomic regions of interest
(A) Repeat element density enrichment/depletion in genomic regions of the mRNAs correlated with the tRFs
	ACC	BLCA	BRCA	CESC	CHOL	COAD	DLBC	ESCA	HNSC	KICH	KIRC	KIRP	LAML	LGG	LIHC	LUAD	LUSC	MESO	OV	PAAD	PCPG	PRAD	READ	SARC	SKCM	STAD	TGCT	THCA	THYM	UCEC	UCS	UVM
Spearman rho coefficient of repeat element density with mRNA abundance	-0.105404	-0.131407	-0.0973065	-0.124113	-0.113768	-0.105373	-0.0988581	-0.0872491	-0.119166	-0.0909317	-0.0958312	-0.108987	-0.0579212	-0.0983966	-0.100094	-0.119971	-0.0998769	-0.122572	-0.11063	-0.126976	-0.130298	-0.100768	-0.103654	-0.130187	-0.131495	-0.0992349	-0.0847764	-0.104401	-0.116282	-0.125143	-0.126572	-0.126493
(B) Repeat element density enrichment/depletion in genomic regions whose transcribed mRNAs are correlated with tRFs
Note: Values are the Z-scores of the observed mean density of each repeat family (in sense or antisense orientation) with reference to the distrivution of randomly-selected equally-sized set of genes. Values in parenthesis are the FDR scores (corrected P-values of Kolmogorov-Smirnov tests). Neg: Negative correlations with tRFs, Pos: Positive Correlations with tRFs
Exons
	ACC MT_tRNA_fragment Pos	ACC MT_tRNA_fragment Neg	ACC N_tRNA_fragment Pos	ACC N_tRNA_fragment Neg	BLCA MT_tRNA_fragment Pos	BLCA MT_tRNA_fragment Neg	BLCA N_tRNA_fragment Pos	BLCA N_tRNA_fragment Neg	BRCA MT_tRNA_fragment Pos	BRCA MT_tRNA_fragment Neg	BRCA N_tRNA_fragment Pos	BRCA N_tRNA_fragment Neg	CESC MT_tRNA_fragment Pos	CESC MT_tRNA_fragment Neg	CESC N_tRNA_fragment Pos	CESC N_tRNA_fragment Neg	CHOL MT_tRNA_fragment Pos	CHOL MT_tRNA_fragment Neg	CHOL N_tRNA_fragment Pos	CHOL N_tRNA_fragment Neg	COAD MT_tRNA_fragment Pos	COAD MT_tRNA_fragment Neg	COAD N_tRNA_fragment Pos	COAD N_tRNA_fragment Neg	DLBC MT_tRNA_fragment Pos	DLBC MT_tRNA_fragment Neg	DLBC N_tRNA_fragment Pos	DLBC N_tRNA_fragment Neg	ESCA MT_tRNA_fragment Pos	ESCA MT_tRNA_fragment Neg	ESCA N_tRNA_fragment Pos	ESCA N_tRNA_fragment Neg	HNSC MT_tRNA_fragment Pos	HNSC MT_tRNA_fragment Neg	HNSC N_tRNA_fragment Pos	HNSC N_tRNA_fragment Neg	KICH MT_tRNA_fragment Pos	KICH MT_tRNA_fragment Neg	KICH N_tRNA_fragment Pos	KICH N_tRNA_fragment Neg	KIRC MT_tRNA_fragment Pos	KIRC MT_tRNA_fragment Neg	KIRC N_tRNA_fragment Pos	KIRC N_tRNA_fragment Neg	KIRP MT_tRNA_fragment Pos	KIRP MT_tRNA_fragment Neg	KIRP N_tRNA_fragment Pos	KIRP N_tRNA_fragment Neg	LAML MT_tRNA_fragment Pos
DNA.Sense	-0.321716396377 (0.752035454257625)	-0.701493133018 (0.529716924288701)	0.172851798313 (0.981163366836644)	-0.688167237713 (0.772724154490336)	0 (0)	0 (0)	0 (0)	-0.446878280679 (0.969803848376914)	-1.16634156893 (0.273324130108796)	0.380841881305 (0.494646163754437)	0 (0)	0.0859742188654 (0.579591169276132)	-0.183726936689 (0.647914869140452)	0 (0)	-0.32385193697 (0.997715402835473)	0 (0)	0 (0)	0 (0)	0 (0)	0 (0)	0 (0)	0 (0)	-0.494785849599 (0.388936297953652)	0 (0)	-0.441816994403 (0.96556069577277)	-1.36621002957 (0.285435540069401)	-1.48755074849 (0.248942388975482)	0 (0)	-0.436515278222 (0.785821814698235)	0 (0)	-0.43568359836 (0.999665407481976)	-0.528541586836 (0.951927641104628)	-0.295754638241 (0.948056991160533)	0 (0)	0 (0)	-0.258064963043 (0.948056991160533)	0.61681987963 (0.942514620312864)	-0.486425007286 (0.985526977911403)	0 (0)	-0.334848457947 (0.936653900381669)	-0.529326323782 (0.810791966469047)	0 (0)	-0.867381191343 (0.72630803242457)	-0.0147906087292 (0.947566873372897)	-1.12257333032 (0.0456517117430161)	0 (0)	-1.24165614853 (0.0111886180375543)	-0.297410938097 (0.640574706964124)	1.86014775983 (0.297767900962135)
DNA/Kolobok.Sense	0 (0)	0 (0)	1.01921747117 (0)	0 (0)	0 (0)	0 (0)	0 (0)	0 (0)	0 (0)	0 (0)	0 (0)	0 (0)	0 (0)	0 (0)	0 (0)	0 (0)	0 (0)	0 (0)	0 (0)	0 (0)	0 (0)	0 (0)	0 (0)	0 (0)	0 (0)	0 (0)	0 (0)	0 (0)	0 (0)	0 (0)	0 (0)	0 (0)	0 (0)	0 (0)	0 (0)	0 (0)	-1.00571424391 (0.985526977911403)	0 (0)	0 (0)	0 (0)	0 (0)	0 (0)	0 (0)	0 (0)	0 (0)	0 (0)	0 (0)	-1.01042788005 (0.985526977911403)	0 (0)
DNA/MULE-MuDR.Sense	-1.04446777302 (0.985526977911403)	-1.06976704302 (0.985526977911403)	-1.01355463561 (0.985526977911403)	0 (0)	0 (0)	0 (0)	0 (0)	0 (0)	0 (0)	0 (0)	1.0239602659 (0)	0 (0)	0 (0)	0 (0)	0 (0)	0 (0)	0 (0)	0 (0)	0 (0)	0 (0)	0 (0)	0 (0)	0 (0)	0 (0)	0 (0)	1.04443357689 (0)	1.05583411828 (0)	1.01918065879 (0)	0 (0)	0 (0)	0 (0)	0 (0)	0 (0)	0 (0)	0 (0)	0 (0)	0 (0)	0 (0)	-1.07624960273 (0.985526977911403)	0.982972784026 (0)	0 (0)	0 (0)	0 (0)	0 (0)	0 (0)	0 (0)	0 (0)	0 (0)	0 (0)
DNA/Merlin.Sense	0 (0)	0 (0)	0 (0)	0 (0)	0 (0)	0 (0)	0 (0)	0 (0)	0 (0)	0 (0)	0 (0)	0 (0)	0 (0)	0 (0)	0 (0)	0 (0)	0 (0)	0 (0)	0 (0)	0 (0)	0 (0)	0 (0)	0 (0)	0 (0)	0 (0)	0 (0)	0 (0)	0 (0)	0 (0)	0 (0)	0 (0)	0 (0)	0 (0)	0 (0)	0 (0)	0 (0)	0 (0)	0 (0)	0 (0)	0 (0)	0 (0)	0 (0)	0 (0)	0 (0)	0 (0)	0 (0)	0 (0)	0 (0)	0 (0)
DNA/PIF-Harbinger.Sense	0 (0)	0 (0)	0 (0)	0 (0)	0 (0)	0 (0)	0 (0)	0 (0)	0 (0)	0 (0)	0 (0)	0 (0)	0 (0)	0 (0)	0 (0)	0 (0)	0 (0)	0 (0)	0 (0)	0 (0)	0 (0)	0 (0)	0 (0)	0 (0)	0 (0)	0 (0)	0 (0)	0 (0)	0 (0)	0 (0)	0 (0)	0 (0)	0 (0)	0 (0)	0 (0)	0 (0)	0 (0)	0 (0)	0 (0)	0 (0)	0 (0)	0 (0)	0 (0)	0 (0)	0 (0)	0 (0)	0 (0)	0 (0)	0 (0)
DNA/PiggyBac.Sense	0 (0)	0 (0)	-0.177551261576 (0.620400969376515)	0 (0)	0 (0)	0 (0)	0 (0)	0.575346212919 (0.620400969376515)	0 (0)	0 (0)	0 (0)	0 (0)	0 (0)	0 (0)	0 (0)	0 (0)	0 (0)	0 (0)	0 (0)	0 (0)	-0.915343265892 (0.620400969376515)	0 (0)	-0.915460637837 (0.620400969376515)	0 (0)	-1.20757839147 (0.772724154490336)	0 (0)	0 (0)	0 (0)	-1.12021167518 (0.529779728776358)	0 (0)	0 (0)	-0.919005362405 (0.948056991160533)	0 (0)	0 (0)	0 (0)	0 (0)	1.53955647683 (0.404951645954512)	0 (0)	0 (0)	-0.77392030439 (0.966889689960211)	0.562164559661 (0.498114899440756)	0 (0)	0 (0)	1.54335629333 (0.404951645954512)	0 (0)	0 (0)	0 (0)	0 (0)	0 (0)
DNA/TcMar.Sense	1.20018382515 (0.620400969376515)	-0.46270931587 (0.985526977911403)	0 (0)	-0.468630598268 (0.985526977911403)	-0.727265327019 (0.494646163754437)	-0.652142280566 (0.667100977199253)	-0.925246136982 (0.273918858671148)	0 (0)	0 (0)	0 (0)	-0.756664361589 (0.71846917080085)	0 (0)	0 (0)	0 (0)	-0.776450841199 (0.529779728776358)	0 (0)	0 (0)	0 (0)	0 (0)	0 (0)	0 (0)	0 (0)	0 (0)	0 (0)	0.105728024709 (0.948056991160533)	0 (0)	-0.697795086214 (0.969803848376914)	0.87373119541 (0.620400969376515)	0 (0)	0.684905369768 (0.256431750593046)	-0.957529516427 (0.253282964562478)	-0.0783891175098 (0.32683379758556)	0 (0)	0 (0)	0 (0)	0 (0)	0.267340338389 (0.948056991160533)	0 (0)	0 (0)	-0.653106851579 (0.948056991160533)	1.02069597368 (0.620400969376515)	0 (0)	-0.726720121217 (0.362046798662895)	0 (0)	-0.675842189557 (0.32683379758556)	0 (0)	-0.693513219119 (0.32683379758556)	0 (0)	0 (0)
DNA/TcMar-Mariner.Sense	-0.272052311663 (0.99312352456432)	-0.45603068899 (0.458407944000844)	0.828798311293 (0.581582252250734)	-0.128429258667 (0.678185934267733)	-0.367321898502 (0.999996769956)	0 (0)	0.728139152593 (0.995374171943462)	-0.323394374172 (0.815143212793741)	0.378005162769 (0.972226848603505)	-0.906397083932 (0.283948043272361)	0.574571360585 (0.427545560476727)	-1.01652017218 (0.283948043272361)	-0.77790871764 (0.437411979123519)	1.67118130008 (0.281825460368295)	0 (0)	0.187189010243 (0.966889689960211)	0 (0)	0 (0)	0 (0)	0 (0)	0 (0)	0 (0)	0 (0)	0.137841814193 (0.966889689960211)	-1.2413260118 (0.281825460368295)	-1.17427024548 (0.415329023377256)	-0.786737558811 (0.611003949486931)	0.313120768485 (0.964539934575833)	-0.892465423648 (0.24892124754919)	-0.659071446028 (0.998670735114156)	-1.17342312641 (0.431468937734586)	-0.111678173208 (0.694815776064783)	-0.735231906348 (0.646646008020416)	0.784876019189 (0.762711380035067)	0 (0)	-0.891798017907 (0.1528644356211)	-0.354697701318 (0.802827325603663)	-0.697222948916 (0.942900144974664)	-0.3626517898 (0.974784887067733)	-0.661870869957 (0.587935132596022)	-0.288360593507 (0.152778524096053)	4.00183419275 (0.0942029187517259)	-1.18187150978 (0.691064143072392)	-1.10840650825 (0.149576002740082)	-0.352174097328 (0.433291149825784)	0 (0)	-0.351444763409 (0.621837419698384)	0.551670255314 (0.737731653057084)	-1.15045303527 (0.122695633307341)
DNA/TcMar-Pogo.Sense	0 (0)	0 (0)	0 (0)	0 (0)	0 (0)	0 (0)	0 (0)	0 (0)	0 (0)	0 (0)	0 (0)	0 (0)	0 (0)	0 (0)	0 (0)	0 (0)	0 (0)	0 (0)	0 (0)	0 (0)	0 (0)	0 (0)	0 (0)	0 (0)	0 (0)	0 (0)	0 (0)	0 (0)	0 (0)	0 (0)	0 (0)	0 (0)	0 (0)	0 (0)	0 (0)	0 (0)	0 (0)	0 (0)	0 (0)	0 (0)	0 (0)	0 (0)	0 (0)	0 (0)	0 (0)	0 (0)	0 (0)	0 (0)	0 (0)
DNA/TcMar-Tc1.Sense	0 (0)	0 (0)	0 (0)	0 (0)	0 (0)	0 (0)	0 (0)	0 (0)	0 (0)	0 (0)	0 (0)	0 (0)	0 (0)	0 (0)	0 (0)	-0.880169296542 (0.691064143072392)	0 (0)	0 (0)	0 (0)	0 (0)	2.12712214819 (0)	0 (0)	2.14176324002 (0)	0 (0)	-0.205477442491 (0.96556069577277)	0 (0)	-0.499673460303 (0.772724154490336)	-0.898278722007 (0.458407944000844)	0 (0)	0 (0)	0 (0)	0 (0)	0 (0)	0 (0)	0 (0)	0 (0)	-0.365178650376 (0.985526977911403)	0 (0)	0 (0)	0 (0)	-0.538428015268 (0.966889689960211)	0 (0)	0 (0)	-0.544632217383 (0.966889689960211)	0 (0)	0 (0)	0 (0)	-1.12674643475 (0.458407944000844)	0 (0)
DNA/TcMar-Tc2.Sense	0 (0)	0 (0)	-1.41890541024 (0.297963142580019)	0.981288870466 (0.222437739989029)	0 (0)	0 (0)	0.902624734266 (0.273918858671148)	0.886094932389 (0.494646163754437)	0 (0)	0 (0)	0 (0)	0 (0)	0 (0)	0 (0)	0 (0)	0 (0)	0 (0)	0 (0)	0 (0)	0 (0)	0 (0)	0 (0)	-0.69706464312 (0.948056991160533)	0 (0)	1.63931766205 (0.271639871382637)	-0.534550789117 (0.948056991160533)	0.738140179513 (0.920141820599718)	0 (0)	-1.09880172709 (0.494646163754437)	0 (0)	-1.0453634086 (0.229204317477912)	-1.43184201378 (0.273918858671148)	0 (0)	-0.0928846097469 (0.980814090134364)	0 (0)	-0.4809520709 (0.980814090134364)	-1.01586188606 (0.380512955493284)	0 (0)	0.892403391173 (0.620400969376515)	0 (0)	-0.796012582468 (0.620400969376515)	0 (0)	-0.488212325889 (0.985526977911403)	-0.66659232243 (0.620400969376515)	-1.2142269185 (0.193592043416688)	0 (0)	-0.97322713116 (0.241807681539063)	0 (0)	0.714503476505 (0.620400969376515)
DNA/TcMar-Tigger.Sense	-1.17027529611 (0.509304459823439)	1.68108393092 (0.24093813918915)	-0.914410404742 (0.256431750593046)	-0.170267468537 (0.904042066826555)	-1.69218245302 (0.292021168835667)	0.375996002887 (0.683727899323436)	-0.734222592262 (0.790656492392587)	0.407600979049 (0.458445623473848)	0.0949437885259 (0.351610422388979)	1.17768538452 (0.268286129442255)	-0.820499174202 (0.918289342525419)	-0.231903624432 (0.772724154490336)	0.10090625653 (0.677839326759129)	1.68330285921 (0.35404088850623)	-1.05397364557 (0.950196524678228)	1.85996381776 (0.504563677720045)	0 (0)	0.00635691542952 (0.789388759742538)	0 (0)	0 (0)	-1.46960292803 (0.305574546940257)	6.12203421722 (0.0806783376260842)	-0.537197901713 (0.998670735114156)	2.8809688919 (0.0115051739798231)	-2.0904884835 (0.140854927501022)	-0.320795111734 (0.519981333261345)	-0.889427432348 (0.243619348005655)	1.91634094623 (0.985526977911403)	-1.45200722741 (0.132806040894747)	-0.368050963879 (0.498863458529497)	-1.59857699294 (0.211080055830359)	-0.50612464527 (0.759389163758936)	-1.03742390055 (0.349365959986509)	4.88204190888 (0.106899333477864)	0.217898719064 (0.840733646905624)	-0.875428624308 (0.68186748037726)	-0.616261485149 (0.86572658694013)	1.3077829263 (0.567966864758368)	0.142667270039 (0.970044547280358)	-0.676160901479 (0.620400969376515)	-0.626486033386 (0.806152175195969)	1.69318174811 (0.66616149020751)	1.01051643163 (0.90910388031657)	-0.157125021942 (0.999996769956)	-1.28960064359 (0.228563050468249)	2.56256827355 (0.523827080223384)	0.335586658304 (0.833413409788496)	-0.534278643287 (0.985526977911403)	-0.012393835696 (0.966889689960211)
DNA/TcMar?.Sense	0 (0)	0 (0)	0 (0)	0 (0)	0 (0)	0 (0)	0 (0)	0 (0)	0 (0)	0 (0)	0 (0)	0 (0)	0 (0)	0 (0)	0 (0)	0 (0)	0 (0)	0 (0)	0 (0)	0 (0)	0 (0)	0 (0)	0 (0)	0 (0)	0 (0)	0 (0)	0 (0)	0 (0)	0 (0)	0 (0)	0 (0)	0 (0)	0 (0)	0 (0)	0 (0)	0 (0)	0 (0)	0 (0)	0 (0)	0.999362854348 (0)	0 (0)	0 (0)	0 (0)	0 (0)	0 (0)	0 (0)	0 (0)	0 (0)	0 (0)
DNA/hAT.Sense	-0.730342568377 (0.985526977911403)	0.326681907119 (0.985526977911403)	0.38716228856 (0.620400969376515)	0.807082387431 (0.292087095061073)	-1.01465088409 (0.458407944000844)	0 (0)	-0.847363522667 (0.281825460368295)	-0.151649351959 (0.997923902918489)	-1.02440980955 (0.362046798662895)	-0.256122004509 (0.741312741312741)	0.171416947693 (0.620400969376515)	-0.272441676093 (0.741312741312741)	0 (0)	0 (0)	-0.496148789456 (0.985851744396963)	-0.41338338366 (0.810791966469047)	0 (0)	0 (0)	0 (0)	0 (0)	-0.400075159957 (0.985526977911403)	0.808759941569 (0.362046798662895)	0 (0)	0.282024431294 (0.620400969376515)	-0.944577675538 (0.983299592184166)	-0.509589733032 (0.992819294527051)	-1.2961969141 (0.344621889268727)	0.0962086627676 (0.732648047871531)	-0.523283623991 (0.971836721090039)	-0.312148097627 (0.936653900381669)	-0.586014611202 (0.971836721090039)	-0.829088819969 (0.983157396628456)	-1.13921082532 (0.102229067491829)	-0.452695515121 (0.95991385604475)	0 (0)	0 (0)	0 (0)	2.36287755922 (0)	0 (0)	-0.432739098467 (0.985526977911403)	-1.18050939046 (0.481843416100034)	1.44352755593 (0.344621889268727)	1.55036058036 (0.344621889268727)	-1.23018676526 (0.481843416100034)	-1.72833755849 (0.184891145557651)	0.483291683681 (0.362046798662895)	-1.86538092359 (0.184891145557651)	1.36804823622 (0.24665325781917)	1.67697418994 (0.207421851294866)
DNA/hAT-Ac.Sense	2.21073892314 (0.927083765560826)	-0.354206659048 (0.705195494976534)	-0.420893859792 (0.989381314164984)	1.83250018413 (0.993747992535184)	0.100579432235 (0.662054468197485)	-0.410382732304 (0.618765637120542)	-0.51668803515 (0.933310190630568)	0.0329420557297 (0.516716732817419)	-0.692851698633 (0.978192512500661)	-0.413053696025 (0.976401829343221)	1.29266556816 (0.958244487172471)	-0.948035045389 (0.276485723400875)	-0.483730763612 (0.985526977911403)	0.0275656041807 (0.78352118150053)	-0.563793356844 (0.558331832125516)	0.11233987364 (0.985526977911403)	0 (0)	0 (0)	0 (0)	0 (0)	-0.426117554639 (0.927083765560826)	1.15989610354 (0.323869610935857)	-0.427720003731 (0.82306441197306)	-0.359635311611 (0.993747992535184)	-0.457705506931 (0.923600591778987)	0.153202090728 (0.764151560440556)	0.259637137163 (0.941848270762914)	-0.954660989865 (0.617790069923448)	-0.563765765858 (0.980814090134364)	0.0832801712903 (0.624652864075605)	-0.649306281637 (0.996546680831081)	-1.2480325773 (0.235581497798262)	0.224069935585 (0.558194463625314)	-1.27287064547 (0.106273400772663)	-0.814895952304 (0.915140306940361)	-0.95710638832 (0.0436662481256857)	0.322372620732 (0.71846917080085)	2.14066897752 (0.0405792009636619)	-0.676927430241 (0.517199038981433)	-1.12673012684 (0.684479654303205)	-1.19098352596 (0.0789176273996143)	1.98472503081 (0.0350413863269136)	-0.423427587861 (0.994652555894192)	0.129654813331 (0.76336396853196)	0.434604187561 (0.442817581392226)	1.14315438117 (0.342251931590795)	0.233860360148 (0.438500613349421)	0.802512785256 (0.280350847874154)	-0.698112502444 (0.985526977911403)
DNA/hAT-Blackjack.Sense	-0.270519249285 (0.999996769956)	0.535665353286 (0.988499718164006)	-0.898158092646 (0.129359747344243)	0 (0)	-0.779694570673 (0.0308922814229974)	0 (0)	-0.603168977042 (0.19882271468144)	-0.739238613057 (0.258118583700148)	-0.722015945741 (0.535394726547219)	0 (0)	-0.414871521933 (0.592604534005038)	0 (0)	0 (0)	0 (0)	0.849786602491 (0.24892124754919)	-0.519118851419 (0.772724154490336)	0 (0)	0 (0)	0 (0)	2.26795150596 (0.145702902675029)	-0.757637187949 (0.458407944000844)	2.65112069058 (0.134376789463584)	-0.810098879426 (0.0917114476470364)	-0.957731834757 (0.0917114476470364)	-1.02685567206 (0.393037699485172)	1.03977953033 (0.529779728776358)	-1.12826455427 (0.0318620255115279)	-0.591281294644 (0.985526977911403)	-0.400661063338 (0.998670735114156)	-0.684974461216 (0.973866033112444)	-0.374439668235 (0.260226802497309)	-0.914957358776 (0.310006204942771)	-0.611343322212 (0.713026452234511)	1.90703364663 (0.586227911713961)	-0.425689347945 (0.985526977911403)	0 (0)	-0.593700209023 (0.786556308001517)	1.86672576539 (0.195248220393825)	0 (0)	1.82536235339 (0.0917114476470364)	-0.342331857074 (0.93322109174372)	-0.718317824003 (0.755432134463718)	-0.635037518723 (0.914980186787237)	-0.346404164933 (0.93322109174372)	-0.89660233729 (0.297963142580019)	0 (0)	-0.986766956654 (0.297963142580019)	-0.958125231104 (0.445295950326807)	-0.606485443442 (0.985526977911403)
DNA/hAT-Charlie.Sense	-1.9484960336 (0.256121428964663)	0.223298845778 (0.432563679792689)	1.71992211627 (0.620400969376515)	-0.513513891297 (0.360715285084898)	1.53743410771 (0.948056991160533)	-0.306315628159 (0.408066386493618)	3.11460841523 (0.810901518539171)	0.535370199753 (0.898433883543357)	0.260753263698 (0.53539144571017)	-0.747679341165 (0.999723767236711)	1.99797621453 (0.948056991160533)	-0.889026647267 (0.985526977911403)	-0.0766150554638 (0.985526977911403)	0.402050359245 (0.361963356694493)	-0.0958067017804 (0.833042357959325)	-0.518770793568 (0.231496735345373)	0 (0)	-0.329367542776 (0.97718745850795)	0.51153317631 (0.744469516948405)	0 (0)	-0.804617611215 (0.609431471421469)	-0.270463437404 (0.297963142580019)	0.800152604959 (0.936653900381669)	1.25432002933 (0.219046773303073)	-1.1631342335 (0.0468392577613458)	2.69762900199 (0.859151212129497)	0.645543777928 (0.761515118476698)	1.1067131283 (0.0699773091273202)	-0.600714712635 (0.787353062318688)	1.23018905296 (0.832781619292302)	0.282408430115 (0.491453258379328)	-0.944458620705 (0.671200236929676)	-1.05550378085 (0.218331694058448)	-0.0758303686096 (0.52138466521919)	-1.07932772484 (0.775124952532186)	-1.05944442409 (0.0843762589199972)	-0.955626699204 (0.296193208394559)	-0.254359546003 (0.55683192107301)	1.66784583951 (0.62382639499996)	0.430176654517 (0.910057783429547)	-2.14619092507 (0.0014450288244511)	-0.242615302577 (0.470444243809285)	-0.802746876147 (0.857071685143483)	-1.22850259863 (0.78872429529214)	0.234055127799 (0.0499656501186032)	0.257314677657 (0.133832418131487)	1.01404746969 (0.113880794020466)	0.246120602049 (0.233555385438176)	-0.118247498713 (0.969803848376914)
DNA/hAT-Tag1.Sense	0 (0)	0.320871011654 (0.948056991160533)	0 (0)	0 (0)	0 (0)	0 (0)	0 (0)	1.21567949976 (0)	0 (0)	1.1918168694 (0)	0 (0)	0.210599910035 (0.620400969376515)	0 (0)	0 (0)	0 (0)	0 (0)	0 (0)	0 (0)	0 (0)	0 (0)	0 (0)	0 (0)	0 (0)	0 (0)	0 (0)	0 (0)	0 (0)	0 (0)	0 (0)	0.15395249847 (0.546629560400987)	0 (0)	0.824066211106 (0.222437739989029)	-1.62985985085 (0.529779728776358)	0 (0)	0 (0)	-0.332434056994 (0.998670735114156)	0.219958461616 (0.620400969376515)	0 (0)	0 (0)	0 (0)	-0.738773663178 (0.948056991160533)	0 (0)	0 (0)	0 (0)	0 (0)	0 (0)	0 (0)	-1.71155562437 (0.529779728776358)	0 (0)
DNA/hAT-Tip100.Sense	-0.581765450506 (0.989488391412105)	-1.03278956288 (0.963940541668787)	1.7607004389 (0.977197918869628)	0.0405875328049 (0.971684240574299)	-0.735745199172 (0.297844141548638)	0 (0)	-0.343657145988 (0.583894645315396)	-0.472647752487 (0.62719325895001)	0.83074857964 (0.18801071705374)	-1.09420458573 (0.275835098581835)	0.760867209453 (0.0887903081675487)	0.160459933593 (0.803339254021425)	-0.350078009632 (0.981048923093902)	0.357731228851 (0.627986066228619)	0.022054185052 (0.406981417450922)	-0.126881508707 (0.911458509379944)	-0.976271485686 (0.161094750190694)	0 (0)	0 (0)	0 (0)	0.180701536475 (0.825620871687258)	-0.294633672003 (0.998214857523328)	0.0729807323852 (0.825620871687258)	-0.657306051123 (0.986277562335851)	0.447515521062 (0.400792910997413)	-1.29027551731 (0.496169348971171)	1.2893242411 (0.791959537018886)	0.488966591014 (0.918289342525419)	-0.636416652396 (0.318797999073359)	-0.838731068645 (0.359053110987184)	-0.533656218826 (0.164720095471896)	-0.764012301751 (0.929619592690511)	-0.514615292158 (0.2831004322904)	1.24249030198 (0.985526977911403)	-0.621960400886 (0.922836611305445)	0.756681216136 (0.502396943432574)	-1.05004863822 (0.229340870083402)	-0.901614970153 (0.910130685431662)	-0.205773367341 (0.270830522786917)	0.162725770449 (0.930634438828364)	0.338512259161 (0.680815791450379)	0.341797422017 (0.213857457751653)	1.41889741334 (0.644778644631747)	-0.60348091699 (0.918266389684799)	-2.23442786562 (0.0463089345327635)	1.93317328234 (0.131519322708671)	0.823735467877 (0.691064143072392)	2.39910100857 (0.362046798662895)	0.986216250786 (0.769616836646916)
DNA/hAT-Tip100?.Sense	0 (0)	0 (0)	0 (0)	0 (0)	0 (0)	0 (0)	0 (0)	0.882849709566 (0.620400969376515)	0 (0)	0 (0)	0 (0)	0 (0)	0 (0)	0 (0)	-0.283113495807 (0.948056991160533)	0 (0)	0 (0)	0 (0)	0 (0)	0 (0)	0 (0)	0 (0)	0 (0)	0 (0)	-1.50586850184 (0.620400969376515)	0 (0)	-1.49733017077 (0.620400969376515)	0 (0)	0 (0)	0 (0)	0 (0)	1.08116409335 (0)	0 (0)	0 (0)	0 (0)	0 (0)	0 (0)	0 (0)	0 (0)	0 (0)	0 (0)	0 (0)	0 (0)	0 (0)	0 (0)	0 (0)	0 (0)	1.3099668433 (0)	0 (0)
DNA/hAT?.Sense	0 (0)	0 (0)	0 (0)	0 (0)	0 (0)	0 (0)	0 (0)	0 (0)	0 (0)	0 (0)	0 (0)	0 (0)	0 (0)	0 (0)	0 (0)	0 (0)	0 (0)	0 (0)	0 (0)	0 (0)	0 (0)	0 (0)	0 (0)	0 (0)	0 (0)	0 (0)	0 (0)	0 (0)	-0.108744638782 (0.772724154490336)	0 (0)	-0.0763936399802 (0.772724154490336)	-0.0749530802564 (0.772724154490336)	0 (0)	0 (0)	0 (0)	0 (0)	0 (0)	0 (0)	0 (0)	0 (0)	-1.19517154772 (0.772724154490336)	0 (0)	0 (0)	0 (0)	0 (0)	0 (0)	0 (0)	0 (0)	0 (0)
DNA?.Sense	-0.112875761735 (0.987170891752214)	0.956043161311 (0.529779728776358)	0 (0)	-1.04768531466 (0.620400969376515)	0 (0)	0 (0)	-0.429131472413 (0.978192512500661)	0 (0)	0 (0)	-0.527272340438 (0.963940541668787)	0.23178792401 (0.590388104079487)	0.870057519983 (0.940620878936007)	0 (0)	0 (0)	0 (0)	0.567748134743 (0.620400969376515)	0 (0)	0 (0)	0 (0)	0 (0)	0 (0)	0 (0)	0.739942816184 (0.96556069577277)	2.95415967192 (0.145702902675029)	0.196099795697 (0.842560786120089)	-1.48886570646 (0.32683379758556)	0.25345743251 (0.842560786120089)	0 (0)	-1.21059806134 (0.514349642685392)	0.402008687541 (0.410587275768241)	0 (0)	-1.03839831849 (0.586227911713961)	0.113643344855 (0.999214119588923)	0.484397476846 (0.579591169276132)	0 (0)	0.43666352228 (0.458407944000844)	0.652676587205 (0.312459694715488)	0.896948799555 (0.567484508036123)	0.974835120202 (0.70597131101967)	0 (0)	0.112741609684 (0.985526977911403)	0 (0)	-0.0253709684887 (0.996395090190572)	-0.557296750537 (0.969868923024401)	0.595130956814 (0.445295950326807)	0 (0)	0 (0)	-1.25817686212 (0.195248220393825)	0.530396121819 (0.96556069577277)
DNA?/PiggyBac?.Sense	0 (0)	0 (0)	0 (0)	0 (0)	0 (0)	0 (0)	0 (0)	0 (0)	0 (0)	0 (0)	0 (0)	0 (0)	0 (0)	0 (0)	0 (0)	0 (0)	0 (0)	0 (0)	0 (0)	0 (0)	0 (0)	0 (0)	0 (0)	0 (0)	0 (0)	0 (0)	0 (0)	0 (0)	0 (0)	0 (0)	0 (0)	0 (0)	0 (0)	0 (0)	0 (0)	0 (0)	0 (0)	0 (0)	0 (0)	0 (0)	0 (0)	0 (0)	0 (0)	0 (0)	0 (0)	0 (0)	0 (0)	0 (0)	0 (0)
DNA?/hAT-Tip100?.Sense	0 (0)	0 (0)	0 (0)	0 (0)	0 (0)	0 (0)	0 (0)	0 (0)	0 (0)	0 (0)	0 (0)	0 (0)	0 (0)	0 (0)	0 (0)	0 (0)	0 (0)	0 (0)	0 (0)	0 (0)	0 (0)	0 (0)	0 (0)	0 (0)	0 (0)	0 (0)	0 (0)	0 (0)	0 (0)	0 (0)	0 (0)	0 (0)	0 (0)	0 (0)	0 (0)	0 (0)	0 (0)	0 (0)	0 (0)	0 (0)	0 (0)	0 (0)	0 (0)	0 (0)	0 (0)	0 (0)	0 (0)	0 (0)	0 (0)
LINE/CR1.Sense	-1.22042019637 (0.470170423935782)	0.395414900166 (0.889202077545572)	-0.648612728384 (0.710479717245843)	0.348351838293 (0.841314583055903)	-0.565513515227 (0.967141038700828)	0.178844909732 (0.250795164552855)	-1.41908944357 (0.107860161061961)	-0.112751863482 (0.999996769956)	-0.906006688072 (0.916808209850289)	0.159558849864 (0.592967613114139)	-0.197750880952 (0.721629864469293)	2.7894681588 (0.0187930244932844)	0.0208425380834 (0.217277300766999)	0.111709781061 (0.570852051588046)	0.528268345138 (0.948056991160533)	0.699801060047 (0.0736933789398112)	0 (0)	0 (0)	0 (0)	0 (0)	-0.137374915485 (0.605551600177526)	0.127088524945 (0.823168803016964)	-0.688450042247 (0.940279679403055)	-0.725323734848 (0.998670735114156)	-0.352264479215 (0.95991385604475)	2.42168518046 (0.200214256345079)	-1.48827028234 (0.0666685274178849)	3.47878952753 (0.130351652743368)	-1.17381658477 (0.249010257234192)	0.756564369581 (0.640574706964124)	-0.967214911134 (0.715834732744816)	-1.13553542299 (0.529779728776358)	-0.974014032336 (0.689597009264746)	-0.62394621359 (0.65512177389999)	-1.30100041796 (0.357434947566511)	-0.972948526469 (0.630555569234019)	-0.454573674931 (0.948056991160533)	2.69725718568 (0.691064143072392)	0.487470827361 (0.351166475406699)	4.66851479684 (0.178578575449386)	-0.627086403236 (0.433661549425573)	1.86275616393 (0.00982766917169678)	-0.285046232907 (0.849921297691956)	-0.262924600415 (0.620435228323774)	-0.954333957378 (0.0122507868669205)	0.19652362027 (0.32900595723353)	-0.754473426874 (0.154487546022713)	1.38702557378 (0.0431022748568245)	0.211307042304 (0.793662726149978)
LINE/Dong-R4.Sense	0 (0)	0 (0)	0 (0)	0 (0)	0 (0)	0 (0)	0 (0)	0 (0)	0 (0)	0 (0)	0 (0)	0 (0)	0 (0)	0 (0)	0 (0)	0 (0)	0 (0)	0 (0)	0 (0)	0 (0)	0 (0)	0 (0)	0 (0)	0 (0)	0 (0)	0 (0)	0 (0)	0 (0)	0 (0)	0 (0)	0 (0)	0 (0)	0 (0)	0 (0)	0 (0)	0 (0)	0 (0)	0 (0)	0 (0)	0 (0)	0 (0)	0 (0)	0 (0)	0 (0)	0 (0)	0 (0)	0 (0)	0 (0)	0 (0)
LINE/Jockey.Sense	0 (0)	0 (0)	0 (0)	0 (0)	0 (0)	0 (0)	0 (0)	0 (0)	0.983702248378 (0)	0 (0)	0.976815661424 (0)	0 (0)	0 (0)	0 (0)	0 (0)	0 (0)	0 (0)	0 (0)	0 (0)	0 (0)	1.02277372117 (0)	0 (0)	-0.0340994004174 (0.620400969376515)	-1.05412651939 (0.985526977911403)	0 (0)	0 (0)	0 (0)	0 (0)	-1.00517629775 (0.985526977911403)	0 (0)	-1.01976211985 (0.985526977911403)	0 (0)	-0.0142298767839 (0.620400969376515)	0 (0)	0 (0)	0.0327641851842 (0.620400969376515)	-1.03634660069 (0.985526977911403)	0 (0)	0 (0)	0 (0)	-0.699681533845 (0.992819294527051)	0 (0)	0 (0)	-1.0681750855 (0.772724154490336)	-1.01705112449 (0.985526977911403)	0 (0)	0 (0)	1.07698309495 (0)	0 (0)
LINE/L1.Sense	-1.75468671849 (0.043153471095819)	-0.422209109599 (0.620400969376515)	-0.673738369423 (0.985526977911403)	-0.132318320759 (0.539890205937838)	-0.721019680821 (0.985526977911403)	-0.606859821386 (0.755432134463718)	-0.0376393405288 (0.558040882833536)	0.357368769574 (0.728322718669147)	-2.00785864392 (0.0974063680395779)	1.5940401641 (0.437015266090571)	-0.835096430636 (0.963940541668787)	0.202922653389 (0.930534115779745)	-1.31743304639 (0.458601411822125)	0.678968807773 (0.497630567129252)	-1.52213303677 (0.324191721508382)	-0.806512266649 (0.959192991684323)	0 (0)	0 (0)	0 (0)	0 (0)	-1.28862569458 (0.409915528692678)	1.2371170224 (0.752441563532691)	-1.7515108984 (0.169335610454357)	-1.02014513944 (0.333320146270998)	-1.00523469888 (0.147157463115504)	1.29576122577 (0.168243653118175)	-1.04713438287 (0.966611706407989)	1.65879129003 (0.207664734763409)	-1.86153303464 (0.25879740820195)	1.72834947692 (0.681751195710528)	-1.31667170301 (0.729704026328543)	1.52432834304 (0.527833449150123)	-1.37836960061 (0.209009700487773)	-0.75394630354 (0.55680789770664)	-1.15264365948 (0.82972579009661)	-0.575313494091 (0.32683379758556)	-0.35306116787 (0.380192243114092)	0.80109449136 (0.433588560798832)	1.95513579776 (0.422251328047721)	1.88698162542 (0.0373069693883029)	-0.924498873928 (0.17322488235066)	0.913777609332 (0.26591475293613)	-1.12770989897 (0.974880615639352)	-0.114914869707 (0.998633737199968)	-0.131405995596 (0.386572100987937)	1.29479817184 (0.581454848909839)	1.31569577438 (0.541865709204051)	0.426856878308 (0.166727364931313)	-3.30014330847 (0.0762825266888927)
LINE/L1-Tx1.Sense	0 (0)	0 (0)	-0.999455782273 (0)	0 (0)	0 (0)	0 (0)	0 (0)	0 (0)	0 (0)	0 (0)	0 (0)	0 (0)	0 (0)	0 (0)	0 (0)	0 (0)	0 (0)	0 (0)	0 (0)	0 (0)	0 (0)	0 (0)	0 (0)	0 (0)	0 (0)	0 (0)	0 (0)	0 (0)	0 (0)	-0.999486521147 (0)	0 (0)	0 (0)	0 (0)	0 (0)	0 (0)	0 (0)	0 (0)	0 (0)	0 (0)	0 (0)	0 (0)	0 (0)	0 (0)	0 (0)	0 (0)	0 (0)	0 (0)	0 (0)	0 (0)
LINE/L2.Sense	-1.05705133032 (0.576536134757896)	1.79729964651 (0.691064143072392)	-0.387812229519 (0.983463376571664)	-0.229472643994 (0.985526977911403)	-1.14202814853 (0.293802234569575)	-1.40814572876 (0.31440896554863)	0.644471812344 (0.999996769956)	0.575841505186 (0.712135631639577)	-1.25291450812 (0.353376526476505)	0.416535650449 (0.926659825399438)	-0.0768876679375 (0.973844118910957)	0.0354768900683 (0.267947609836283)	-1.15389767691 (0.46148314516567)	2.49797971834 (0.218110861881197)	-1.18895283431 (0.541865709204051)	1.43253833821 (0.0551305271445257)	-0.547544191305 (0.957049034893742)	-0.463348438761 (0.985526977911403)	0 (0)	0 (0)	-1.88568341824 (0.0900369712434599)	2.59006627492 (0.273973378061101)	-0.862522713094 (0.188578821597083)	-0.504363373154 (0.790426311329861)	-2.41765224877 (0.0042637139995247)	4.15150343897 (0.242224761497684)	-0.758576134657 (0.0713225649705706)	1.12350296524 (0.988871163210016)	-2.41726540641 (0.00538890721141906)	2.63028913366 (0.494389667004599)	-0.983816896764 (0.620325856968713)	-0.991390118558 (0.296174122057343)	-2.90652071096 (0.0038388583539236)	0.849682348706 (0.998203625013079)	0.446138336495 (0.294925817086506)	-2.02254957665 (0.51912987844581)	-3.39968461238 (0.000739715712949865)	1.22524585831 (0.0721971541331834)	-1.45497896552 (0.248072482027101)	2.62059348509 (0.0176979998311143)	-2.72181342507 (0.00934205755919916)	3.36798112335 (0.00497126972348507)	0.38879290076 (0.420785914131259)	-0.290561821541 (0.969803848376914)	-1.82671932281 (0.00217903318817242)	3.37047868604 (0.0153167906811555)	-1.57471818986 (0.00835296754035555)	1.92107600966 (0.0949171634090442)	-2.32337717295 (0.297963142580019)
LINE/Penelope.Sense	-0.351014357834 (0.981163366836644)	0 (0)	0 (0)	0 (0)	0 (0)	0 (0)	-0.946055125628 (0.560454802734621)	-0.0192633795985 (0.940279679403055)	-0.32912716562 (0.985526977911403)	0 (0)	-0.622511048405 (0.993717231975404)	-0.836106395194 (0.292087095061073)	-0.497859365717 (0.936653900381669)	0 (0)	0.151457829115 (0.498114899440756)	-0.872645962718 (0.948056991160533)	0 (0)	0 (0)	0 (0)	0 (0)	-1.35023529144 (0.458407944000844)	1.84240512242 (0.253282964562478)	0.127657842562 (0.772724154490336)	-0.436746273905 (0.96556069577277)	-0.494207192714 (0.708948812652512)	2.37758371501 (0)	-0.852865902278 (0.57889855326054)	2.3649367238 (0)	-0.770017836251 (0.985526977911403)	0 (0)	-0.931812648027 (0.948056991160533)	-0.853769544325 (0.985526977911403)	-1.27741401335 (0.0335453448068184)	0 (0)	-1.49646194121 (0.220833877924233)	-0.834296534581 (0.149576002740082)	-1.28836001126 (0.114627556927827)	0 (0)	0 (0)	0 (0)	-0.932723677893 (0.32683379758556)	1.92028115518 (0.0596807735612376)	0.231962743952 (0.96556069577277)	0.18834059762 (0.96556069577277)	0 (0)	0 (0)	-0.710466212357 (0.772724154490336)	0.763711579604 (0.720742921857703)	0.161441776367 (0.957647290741243)
LINE/RTE-BovB.Sense	-0.900616284966 (0.673618572563658)	-0.759431642374 (0.987170891752214)	-0.665150502763 (0.14571570838372)	-0.592884049464 (0.748638428230214)	2.01066323264 (0.985526977911403)	0.530603379027 (0.436400866449013)	1.1708176698 (0.985526977911403)	0.302564129208 (0.443510109954751)	0.320789253451 (0.936653900381669)	0.593224511424 (0.195248220393825)	-0.198244949782 (0.910854725837749)	1.78418624131 (0.717381483356457)	1.19189328784 (0.948727124064418)	0.720499203857 (0.488725247349524)	-0.56176330518 (0.500882090076822)	1.16667363261 (0.169171873984306)	0 (0)	0 (0)	0 (0)	0 (0)	-0.476987546101 (0.991209286073507)	-0.650245535447 (0.963940541668787)	1.55736473267 (0.948056991160533)	-0.420171949614 (0.985526977911403)	0.142436661104 (0.930932720761625)	-0.54451928769 (0.992736600968846)	-0.554669999426 (0.0145417686883099)	-0.740324199087 (0.795256477497157)	-0.494183900443 (0.444426928167843)	0.985751455491 (0.691064143072392)	-0.626659700892 (0.992819294527051)	-0.817608521188 (0.620400969376515)	0.874026798701 (0.780491494137653)	0.983688215428 (0.353732709777224)	-0.475774218265 (0.760176582031024)	-0.673336095788 (0.520283270398959)	-0.807569893507 (0.752582975281611)	-0.0146748507353 (0.467093419983753)	-0.584856022793 (0.910854725837749)	-0.187892109994 (0.999996769956)	0.153454775692 (0.0319743985380895)	0 (0)	0.623204883274 (0.349160354731405)	-0.640176781459 (0.695510963423005)	0.276389971303 (0.0681057927089932)	1.04965163653 (0.31353478566409)	1.65452646515 (0.246913227633896)	0.528839447281 (0.573520562762878)	-0.123064432834 (0.976304834396353)
LINE/RTE-X.Sense	-0.914079391111 (0.0282893767496091)	-0.295660478025 (0.985526977911403)	-0.628252231011 (0.345345994721259)	0 (0)	-0.0796834470998 (0.918289342525419)	0 (0)	-0.287722982126 (0.979461952384169)	0 (0)	0.153931471226 (0.691064143072392)	0 (0)	0.156718316947 (0.691064143072392)	0 (0)	0 (0)	0 (0)	-0.147442489675 (0.978083993946972)	-0.633649781088 (0.752035454257625)	-0.779230223207 (0.145702902675029)	0 (0)	0 (0)	0 (0)	-0.874203789487 (0.13985886637828)	0 (0)	-0.943626198117 (0.13985886637828)	-0.0922616088764 (0.775995871811338)	-0.582998732158 (0.985526977911403)	-0.789168000008 (0.38277121739917)	-0.700915356645 (0.38277121739917)	-0.395139903319 (0.957647290741243)	-0.0724543642097 (0.915140306940361)	-0.579367634019 (0.713026452234511)	-0.271218235088 (0.999731249251233)	-0.505964757238 (0.985526977911403)	-0.551048640755 (0.918289342525419)	0.108399263961 (0.620400969376515)	-0.231975246943 (0.987170891752214)	-0.581841479513 (0.805448106782893)	-0.596251419282 (0.399927615138115)	-0.630704561266 (0.915140306940361)	0 (0)	0.0198362463332 (0.399927615138115)	0 (0)	-0.557768352509 (0.923713736222587)	0 (0)	-0.12620686164 (0.923713736222587)	0.190429297116 (0.529779728776358)	0 (0)	0.404595749133 (0.129359747344243)	-0.213085207444 (0.987170891752214)	-0.0453874444794 (0.925212352504117)
LTR.Sense	0 (0)	0 (0)	-1.01661684817 (0.362046798662895)	0 (0)	0 (0)	0 (0)	0 (0)	0 (0)	-0.494128715868 (0.985526977911403)	0 (0)	0 (0)	-0.515575660042 (0.985526977911403)	-0.602444844553 (0.966889689960211)	0 (0)	0.0657693661502 (0.948056991160533)	0 (0)	0 (0)	0 (0)	0 (0)	0 (0)	0 (0)	0 (0)	-0.10188241629 (0.966889689960211)	-0.128843753407 (0.966889689960211)	0.0454873684177 (0.772724154490336)	0.0435008508699 (0.772724154490336)	0.0459590583625 (0.772724154490336)	0 (0)	-0.835870157843 (0.691064143072392)	0 (0)	0 (0)	0 (0)	-0.155154238762 (0.948056991160533)	0 (0)	0 (0)	0 (0)	0.0333246760297 (0.691064143072392)	0 (0)	-0.438446833734 (0.966889689960211)	0 (0)	0 (0)	0 (0)	0 (0)	0 (0)	0 (0)	0 (0)	0 (0)	-0.253063001399 (0.974880615639352)	0 (0)
LTR/ERV1.Sense	-1.81071520779 (0.390059376791699)	0.325075899393 (0.977197918869628)	-1.15260997075 (0.705317102108262)	2.03372715587 (0.0706958888727038)	-0.479901536493 (0.999635199212343)	0.0402893397301 (0.676449094959362)	0.177668252569 (0.722784167568574)	-0.41969429189 (0.871523294339299)	-0.605855797732 (0.772724154490336)	-1.82266923869 (0.0642117268855004)	-1.9805667633 (0.048260956028109)	-1.45959755114 (0.0955098229056712)	-0.909363401653 (0.581335108565392)	-1.39472849032 (0.0396754266439483)	-1.04563688244 (0.285435540069401)	-0.897807905371 (0.404951645954512)	0 (0)	0 (0)	0 (0)	0 (0)	-0.541663440748 (0.752723422728876)	-0.426217627411 (0.998670735114156)	-1.01496238968 (0.414290204260406)	0.524969320773 (0.790566686335213)	-0.569864520887 (0.985526977911403)	1.49783952886 (0.866961778662913)	-0.303319007915 (0.908354569088569)	-0.387011899632 (0.985526977911403)	1.03216113568 (0.602369334535179)	0.517589950267 (0.281825460368295)	1.75072643863 (0.248072482027101)	3.65884860317 (0.119069117546733)	-1.1241933615 (0.235312365149536)	-1.09534134827 (0.206622445425733)	-0.0348531205054 (0.985526977911403)	-0.498568424199 (0.832490031582649)	-1.19979479507 (0.10857668465479)	0.400245423802 (0.193719732675918)	0.568577157357 (0.192434765480402)	0.783219969132 (0.356458064963595)	-1.40463208079 (0.0583451721147743)	-1.76212596567 (0.344491220962855)	-2.1590743994 (0.0565539726872041)	-0.785071291673 (0.700461185819689)	0.372593534007 (0.664498996923793)	0.956108405545 (0.547471059070894)	0.53323550457 (0.395155619353602)	0.126820571785 (0.922447138558461)	0.309415600746 (0.942338215437268)
LTR/ERV1?.Sense	0 (0)	0 (0)	0 (0)	0 (0)	0 (0)	0 (0)	0 (0)	0.998297429052 (0)	0 (0)	0 (0)	0 (0)	1.01890221256 (0)	0.976126863195 (0)	0 (0)	0 (0)	1.02119220143 (0)	0 (0)	0 (0)	0 (0)	0 (0)	0 (0)	0 (0)	0 (0)	0 (0)	0.999674849609 (0)	0 (0)	0 (0)	0 (0)	0 (0)	0 (0)	0 (0)	0 (0)	1.2779760546 (0)	0 (0)	0 (0)	1.24310798844 (0)	1.08007425431 (0)	0 (0)	-1.00781767944 (0.985526977911403)	0 (0)	1.08086848428 (0)	0 (0)	0 (0)	1.02696659766 (0)	1.02615007215 (0)	0 (0)	-1.01519967823 (0.985526977911403)	0 (0)	0 (0)
LTR/ERVK.Sense	0 (0)	1.19923483913 (0.529779728776358)	-1.18927480871 (0.207421851294866)	-0.620285433676 (0.96556069577277)	0 (0)	0 (0)	0 (0)	0 (0)	0 (0)	0 (0)	0 (0)	0 (0)	0 (0)	-1.03393818016 (0.593692717635786)	0 (0)	0 (0)	0 (0)	0 (0)	0 (0)	0 (0)	0 (0)	-0.819772202949 (0.772724154490336)	0 (0)	-0.934805887719 (0.772724154490336)	0.0675505367784 (0.417298319396672)	-0.0653604376336 (0.732272586910695)	-0.168251114684 (0.981163366836644)	-0.510509317007 (0.998670735114156)	-0.690970927984 (0.963940541668787)	-1.03934291428 (0.32683379758556)	0.521929347247 (0.772724154490336)	-0.364206422437 (0.96556069577277)	-0.984260074336 (0.253282964562478)	0 (0)	0 (0)	0 (0)	-0.691100582545 (0.966889689960211)	-0.538061665183 (0.985526977911403)	2.17459361367 (0)	0 (0)	-0.794534995278 (0.620400969376515)	-1.10925497309 (0.560454802734621)	-1.18580568161 (0.560454802734621)	-1.20172233556 (0.560454802734621)	-1.33415903022 (0.220833877924233)	-0.164559206246 (0.999731249251233)	0 (0)	-1.4186204111 (0.560454802734621)	0 (0)
LTR/ERVL.Sense	-0.19443236911 (0.981163366836644)	0.196843344395 (0.746932717633117)	-0.742339253866 (0.445295950326807)	0.238964552265 (0.529779728776358)	-0.86424211121 (0.725525312393821)	0 (0)	-0.285169118197 (0.987950550859356)	-0.403206338708 (0.974880615639352)	-1.37684912918 (0.0979108006065961)	0.657491804038 (0.1071948695321)	-0.8937652261 (0.258373432280421)	-0.0681189045727 (0.646307101260072)	-0.393441125211 (0.999932650161301)	-0.0741681663848 (0.956615586119779)	-0.290411371719 (0.985526977911403)	-0.563015102439 (0.969803848376914)	0 (0)	0 (0)	0 (0)	0 (0)	-1.38927652876 (0.329500787665621)	3.74182700755 (0.100639891082369)	-1.645621595 (0.036431032345515)	0.527172736515 (0.966889689960211)	0.160248994468 (0.831448206237494)	1.65584606115 (0.445295950326807)	-0.239835350568 (0.999996769956)	1.38333052014 (0.087172443474869)	-1.11352472808 (0.0725708459111522)	0.552112462221 (0.203033342237043)	-0.0848435406539 (0.682989236495716)	-1.35408152485 (0.733837748608072)	-1.7383601026 (0.350420287726219)	-0.935074907273 (0.567484508036123)	0.0968788564852 (0.44571785717287)	-0.577116327259 (0.929079002907593)	-1.40415667823 (0.457602301208106)	0.146319695631 (0.955853748496804)	-1.13757055448 (0.291199123306292)	0.641747408252 (0.0443584811971448)	-0.157593713268 (0.840271939188304)	0.0413717598652 (0.923156025787772)	0.744525576793 (0.989589866046091)	2.01062941389 (0.836633638277461)	-0.405174917414 (0.773634593563832)	2.2089162648 (0.0168810948608304)	-0.51913466585 (0.791034543099068)	0.211148361183 (0.961864285557211)	0.0239076192073 (0.999731249251233)
LTR/ERVL-MaLR.Sense	-0.453238984852 (0.367610656858307)	0.910614065485 (0.480691610239524)	0.628604823266 (0.96556069577277)	0.359605378506 (0.632052561092655)	-1.51091698113 (0.421665429057366)	0.428355151072 (0.335141193945934)	-0.392902179975 (0.41038102349501)	-0.158648230894 (0.599972454560988)	-0.588530124121 (0.936653900381669)	0.436807014412 (0.814530920278655)	-0.0817806455113 (0.945440192792002)	-0.372875240679 (0.867329344409483)	-1.18617038301 (0.231990254878015)	0.131113085408 (0.930554430450212)	-1.41720083623 (0.451134539598146)	1.03876806235 (0.516999677568674)	-1.11949981384 (0.0293523665084075)	0 (0)	0 (0)	0 (0)	-2.00838996403 (0.0761162685985995)	0.619891334841 (0.446818433588641)	-2.20123506186 (0.0231254886947459)	0.224799756831 (0.945981594408226)	-1.78935628524 (0.100364520755066)	1.38522839018 (0.449502584640996)	-0.194148864336 (0.281826004389323)	-0.309689226709 (0.831733303485397)	-1.61400231796 (0.183877149387455)	1.11985618884 (0.0968843639673016)	0.916799372073 (0.986698855056154)	1.73674749083 (0.121999442674099)	-2.53345867755 (0.0476379049589689)	1.04848803784 (0.155756428054343)	-0.527336596126 (0.996426173563842)	-1.61004426782 (0.250761164347393)	-1.39893228677 (0.107849298508361)	2.82321128768 (0.0714882691403392)	-1.319669767 (0.065921262593155)	1.05131533097 (0.170876748874253)	-1.42927266904 (0.569392272821435)	3.10999760109 (0.00874532407684722)	0.0308902194624 (0.985526977911403)	1.69987977391 (0.840456977808452)	1.41251977082 (0.385329555749217)	3.0385613273 (0.00659323174378392)	0.859083067377 (0.765520403502137)	2.00246579605 (0.444237458659128)	0.281993843838 (0.642468212393607)
LTR/ERVL?.Sense	0 (0)	0 (0)	0 (0)	0 (0)	0 (0)	0 (0)	0 (0)	-0.682328234154 (0.992819294527051)	-1.32147907297 (0.404951645954512)	0 (0)	0 (0)	0 (0)	0 (0)	0 (0)	0 (0)	0 (0)	0 (0)	0 (0)	0 (0)	0 (0)	0 (0)	0 (0)	0 (0)	0 (0)	0 (0)	0 (0)	-0.039871830832 (0.999996769956)	1.36118675264 (0.32683379758556)	-1.30282530922 (0.404951645954512)	-0.517424740075 (0.966889689960211)	0 (0)	-1.38583616222 (0.404951645954512)	-1.25268095124 (0.458407944000844)	1.5620699124 (0)	1.5496891413 (0)	0 (0)	-0.469866926462 (0.992819294527051)	0 (0)	0 (0)	0 (0)	-1.32495611694 (0.404951645954512)	0 (0)	0 (0)	0 (0)	0 (0)	0 (0)	0.878478873828 (0.458407944000844)	0 (0)	-0.474729703122 (0.929883137979317)
LTR/Gypsy.Sense	0 (0)	-0.859666610589 (0.910854725837749)	-0.371009583973 (0.910854725837749)	-0.360980369286 (0.987170891752214)	-0.159983610679 (0.458407944000844)	0 (0)	1.65492188943 (0.0160192959701471)	-0.149106353534 (0.458407944000844)	-0.47209063067 (0.985526977911403)	0 (0)	-0.49442167411 (0.985526977911403)	0 (0)	-0.217069316863 (0.772724154490336)	0 (0)	0.860450783211 (0.620400969376515)	-0.243251085983 (0.772724154490336)	0 (0)	0 (0)	0 (0)	0 (0)	0 (0)	-0.525711054971 (0.980814090134364)	0 (0)	-0.532736804809 (0.992819294527051)	-0.761515105577 (0.985526977911403)	2.77510650459 (0)	2.66854446781 (0.195248220393825)	2.76498530767 (0)	-0.405916217155 (0.985526977911403)	-0.59931194995 (0.980814090134364)	0.174062429075 (0.918289342525419)	-0.732967432612 (0.380512955493284)	-0.8166844526 (0.0917114476470364)	-0.582581580764 (0.963940541668787)	-0.809605188296 (0.253282964562478)	-0.797512694309 (0.253282964562478)	1.03974489071 (0.942900144974664)	-0.552605780682 (0.985526977911403)	0.670786532212 (0.38277121739917)	-0.738019139827 (0.65512177389999)	-0.840443262945 (0.399927615138115)	-0.694650728494 (0.966889689960211)	-0.845090146143 (0.498114899440756)	-0.978762137278 (0.220833877924233)	-0.932059393956 (0.220833877924233)	-0.6625301623 (0.966889689960211)	-0.949859062209 (0.147119889009968)	-0.773437101114 (0.620400969376515)	-0.535888611131 (0.971836721090039)
LTR/Gypsy?.Sense	0 (0)	0 (0)	0 (0)	-0.999461641953 (0)	0 (0)	0 (0)	0 (0)	0 (0)	0 (0)	-0.999159310486 (0)	-0.999374021848 (0)	0 (0)	0 (0)	0 (0)	0 (0)	-0.999368487465 (0)	0 (0)	0 (0)	0 (0)	0 (0)	0 (0)	0 (0)	0 (0)	0 (0)	0 (0)	0 (0)	0 (0)	0 (0)	0 (0)	0 (0)	0 (0)	0 (0)	0 (0)	0 (0)	0 (0)	0 (0)	0 (0)	0 (0)	0 (0)	0 (0)	0 (0)	0 (0)	0 (0)	0 (0)	0 (0)	0 (0)	0 (0)	0 (0)	0 (0)
LTR?.Sense	1.56869193831 (0.236157410319071)	0 (0)	0 (0)	0 (0)	-0.474511412849 (0.983463376571664)	0 (0)	0 (0)	1.62513731238 (0.078675059107557)	0 (0)	1.41917541744 (0.078675059107557)	0 (0)	1.45780249935 (0.431468937734586)	-0.444914718096 (0.983463376571664)	0 (0)	0 (0)	0 (0)	0 (0)	0 (0)	0 (0)	0 (0)	-0.448530520049 (0.985526977911403)	0 (0)	-0.470182306936 (0.985526977911403)	-0.505783563724 (0.985526977911403)	-0.466359294374 (0.969803848376914)	0 (0)	-0.260787127144 (0.546629560400987)	-0.100037145913 (0.998670735114156)	-0.39632705444 (0.983463376571664)	1.57266395554 (0.236157410319071)	-0.576236207272 (0.983463376571664)	0 (0)	-0.805605339679 (0.765675447308762)	0 (0)	0 (0)	0 (0)	-0.0396117041189 (0.999996769956)	0 (0)	0.0521734829143 (0.948056991160533)	0 (0)	-0.0160545488369 (0.732272586910695)	0 (0)	0.430221749066 (0.988499718164006)	-0.368092794568 (0.998670735114156)	0 (0)	0 (0)	0 (0)	0 (0)	0.80316241915 (0.445295950326807)
Low_complexity.Sense	-0.393112044539 (0.841226767825848)	0.304299237522 (0.201076631818136)	-1.35460611764 (0.0613728090412779)	-0.786019644729 (0.905638111650188)	-0.507415501303 (0.0422861235003791)	1.50880092607 (0.735222417827537)	-0.93875199272 (0.0757364773578802)	0.232879305297 (0.77574501699994)	-1.40306562272 (0.0123390219176233)	3.80420594805 (0.000272991189477235)	1.8079024765 (0.616109400530892)	-0.232251884818 (0.592967613114139)	-1.33935144321 (0.416239759872128)	3.90057402484 (1.65929087081472e-06)	-0.251482425063 (0.458407944000844)	2.23451754197 (0.562184754114772)	-1.01519817634 (0.0641849742525072)	0 (0)	0 (0)	-0.228778974821 (0.97221985119968)	-1.04615930128 (0.0118362262312325)	6.15229599259 (7.57104201178113e-06)	-1.41494585716 (0.00873613186276485)	1.16383030947 (0.983463376571664)	-1.9187636589 (0.315902344335781)	2.14057195907 (0.41708225618056)	-4.03147104111 (3.40149356876157e-06)	4.73538822814 (9.01348163459796e-07)	-1.65430650946 (0.0572177043414135)	1.99259973982 (0.265083204965932)	-0.678621624671 (0.637742954027637)	0.971834586254 (0.679190985753151)	-2.71331643068 (0.000146765792327819)	4.49739271832 (0.0126234601875128)	0.494713535752 (0.580822707449346)	-2.14100879043 (0.0115434017016561)	-1.996447865 (0.259565370222187)	3.11935525177 (0.0504613174425983)	-0.121018607685 (0.502396943432574)	0.277097415222 (0.427692600745829)	-3.61810818034 (4.08194408682623e-08)	5.98348821768 (0.000180803525087787)	-0.649233863056 (0.985526977911403)	-0.552135422728 (0.138979513457722)	-2.93613331842 (7.37929072065413e-05)	4.97276302044 (0.00103027625693766)	-1.55562379111 (0.0156665698854485)	1.60266894553 (0.0663254011251604)	-1.37243399917 (0.0819798716517716)
RC/Helitron.Sense	-1.30752806681 (0.772724154490336)	0 (0)	0 (0)	0 (0)	0 (0)	0 (0)	0 (0)	0 (0)	0 (0)	0 (0)	0 (0)	0 (0)	0 (0)	0 (0)	0 (0)	0 (0)	0 (0)	0 (0)	0 (0)	0 (0)	0 (0)	0 (0)	0 (0)	0 (0)	0 (0)	0 (0)	0 (0)	0 (0)	0 (0)	0 (0)	1.03031677831 (0)	1.03860983622 (0)	0 (0)	0 (0)	0 (0)	0 (0)	0 (0)	0 (0)	0 (0)	0 (0)	0 (0)	0 (0)	0 (0)	0 (0)	0 (0)	0 (0)	0 (0)	0 (0)	0 (0)
RC?/Helitron?.Sense	-1.02819154697 (0.985526977911403)	0 (0)	0 (0)	-1.06876368263 (0.985526977911403)	0 (0)	0 (0)	0 (0)	0 (0)	0 (0)	0 (0)	0 (0)	0 (0)	0 (0)	0 (0)	0 (0)	0 (0)	0 (0)	0 (0)	0 (0)	0 (0)	0 (0)	0 (0)	0 (0)	0 (0)	0 (0)	1.02565248652 (0)	0 (0)	1.01461849064 (0)	0 (0)	0 (0)	0 (0)	0 (0)	0 (0)	0 (0)	0 (0)	0 (0)	0 (0)	0 (0)	0 (0)	0 (0)	0 (0)	0 (0)	0 (0)	0 (0)	0 (0)	1.02490482753 (0)	0 (0)	1.03616975999 (0)	0 (0)
RNA.Sense	0 (0)	0.32810967337 (0.772724154490336)	0 (0)	0 (0)	0 (0)	0 (0)	0 (0)	0 (0)	0 (0)	0 (0)	0 (0)	0 (0)	0 (0)	0 (0)	0 (0)	0 (0)	0 (0)	0 (0)	0 (0)	0 (0)	0 (0)	0 (0)	0 (0)	0 (0)	0 (0)	0 (0)	0 (0)	0 (0)	0 (0)	-1.3513123443 (0.772724154490336)	-1.36172052965 (0.772724154490336)	-1.34883942917 (0.772724154490336)	0 (0)	0 (0)	0 (0)	0 (0)	0 (0)	0 (0)	0 (0)	0 (0)	0 (0)	0 (0)	0 (0)	0 (0)	-0.976615024267 (0.985526977911403)	0 (0)	-1.01621881273 (0.985526977911403)	0 (0)	0 (0)
Retroposon/SVA.Sense	-0.917698462111 (0.620400969376515)	-1.03817232299 (0.362046798662895)	0 (0)	0 (0)	0 (0)	0 (0)	0 (0)	0 (0)	-0.415649119635 (0.929883137979317)	0 (0)	0 (0)	0 (0)	0 (0)	0 (0)	0 (0)	0.0201872275596 (0.620400969376515)	0 (0)	0 (0)	0 (0)	0 (0)	0 (0)	0 (0)	0 (0)	0 (0)	-0.123419332156 (0.732885651317032)	2.88166981001 (0)	0.446509366105 (0.969803848376914)	0 (0)	-0.571674371989 (0.966889689960211)	-0.0257087603525 (0.404951645954512)	-0.602290839541 (0.966889689960211)	-0.157990347595 (0.691064143072392)	-0.51409393393 (0.985526977911403)	0.0234248339846 (0.195248220393825)	0 (0)	0 (0)	0 (0)	0 (0)	-0.776220523391 (0.362046798662895)	-0.381725179297 (0.620400969376515)	1.51050901696 (0.32683379758556)	0 (0)	-0.298020172051 (0.576709418118871)	1.49336740188 (0.32683379758556)	0 (0)	0 (0)	1.60234365832 (0.297963142580019)	0 (0)	-0.809293080365 (0.32683379758556)
SINE/5S-Deu-L2.Sense	0 (0)	-2.12595966168 (0.124730547763215)	-0.655764770138 (0.981163366836644)	-0.075411130419 (0.193592043416688)	-0.607953445805 (0.596044335356085)	-0.235434078587 (0.974880615639352)	-0.661627106092 (0.985526977911403)	0.148958719294 (0.529716924288701)	0.0900553144011 (0.640574706964124)	0 (0)	0 (0)	0 (0)	-0.583623991457 (0.532049250941643)	0 (0)	2.19593884582 (0.137854430556934)	0 (0)	0 (0)	0 (0)	0 (0)	0 (0)	-0.600130356518 (0.362046798662895)	0 (0)	-0.491678884393 (0.810791966469047)	0.853562870163 (0.431468937734586)	0.160236549336 (0.974215120310372)	-0.0590376397935 (0.560454802734621)	-0.40400904226 (0.82126220599155)	-0.564969112546 (0.965763680522156)	-0.606285231616 (0.44571785717287)	0.251604194801 (0.184093983205971)	-0.146488702707 (0.998528378723249)	0.16064004991 (0.938655578612768)	-0.11549671027 (0.620400969376515)	-0.628218740602 (0.965763680522156)	0 (0)	-0.366710381074 (0.498335190371097)	-0.220337762814 (0.458407944000844)	-0.346147887137 (0.981163366836644)	-0.449152075761 (0.985526977911403)	0.851087173442 (0.431468937734586)	1.02806824854 (0.208730427727083)	0 (0)	1.26098773848 (0.607747354107421)	-0.456784098158 (0.985526977911403)	-0.945401907571 (0.209942414548137)	0 (0)	-1.15560162048 (0.0917193524008366)	-0.463517538854 (0.948056991160533)	-0.141001307391 (0.458407944000844)
SINE/Alu.Sense	0.351516867168 (0.945683578789262)	0.920009680546 (0.948056991160533)	-1.88657812032 (0.520965696204262)	3.14786877163 (0.11315559346621)	-2.05258939952 (0.131297554947437)	1.27341958695 (0.17996818292414)	-2.97980289737 (0.0195259211222626)	1.52516398628 (0.162114189851949)	-3.41384321093 (0.000471003452144214)	0.583235458435 (0.529085978132379)	-0.552971052007 (0.634981755556582)	0.0513848313966 (0.774268061067799)	-1.28950779376 (0.248072482027101)	4.70052233834 (0.0171388460766231)	-1.3655829759 (0.362692355157472)	1.34749518644 (0.217668471311921)	-0.814622801043 (0.457436306652498)	-1.1055498926 (0.299152858290943)	0.494986924215 (0.481776274936676)	0 (0)	-3.0846146888 (0.00671715338015652)	5.5828018232 (0.00020533344659501)	-2.53989249839 (0.0769652497528853)	-0.341902812121 (0.270374773430491)	-3.46881898939 (0.00223439183307563)	2.83490066103 (0.239852474519121)	-5.46145167417 (1.3900151800044e-05)	2.80182927011 (0.176354673590707)	-2.63636555843 (0.0876710245541886)	2.36093507289 (0.000575903233851288)	-2.73706358394 (0.189498726609109)	-1.08899835624 (0.172311247490768)	-3.93156884625 (7.63970656335047e-06)	1.77243977055 (0.38616719307183)	1.16351552793 (0.292021168835667)	-2.72389481036 (0.010231403671941)	-2.98322885721 (0.000135983195445476)	1.90695274697 (0.32683379758556)	0.774217774791 (0.364788696485995)	2.71764054155 (0.120335606471928)	-3.92676982056 (5.96287899527074e-07)	5.73491880365 (0.000424364219208175)	-0.290728557994 (0.62719325895001)	-1.1206850705 (0.575081015742714)	-4.74708986131 (7.07206457618456e-06)	7.35091239797 (2.56355701373097e-05)	-3.62098424152 (0.000141021127863641)	2.7064775697 (0.00908752817434052)	-3.05753501039 (0.00576163665777527)
SINE/MIR.Sense	-0.271000819105 (0.995172338910622)	0.991708981865 (0.310226264398865)	-1.98215319959 (0.0386095418512323)	2.52667015619 (0.62196719096901)	-1.27404460684 (0.852758225412396)	-1.02120324719 (0.548204355363832)	-1.17525472514 (0.547057744747447)	-0.706489557159 (0.558291944704199)	-2.04052110324 (0.0747461905541831)	1.53179482247 (0.0598996370634369)	-0.0505408859454 (0.923713736222587)	-0.659024136866 (0.796072511180157)	-2.84071203782 (0.000711936245408633)	4.10282626157 (0.0244171283378867)	-1.89947868805 (0.0550235810766651)	3.61931405081 (0.127647511413953)	-1.03380057724 (0.157325389399915)	-0.199878226456 (0.971684240574299)	-0.228481386724 (0.985526977911403)	0 (0)	-2.39158192342 (0.0055713564936871)	6.03705393824 (2.29897289060274e-09)	-3.05696193814 (0.00463488723303103)	3.10034284395 (0.00606583202699359)	-2.61689340298 (0.0192988814587533)	3.94450641539 (0.00256138569926591)	-2.70273280384 (0.0109031430764114)	5.16845666336 (0.00014671323804763)	-2.10582245934 (0.093697741540726)	3.59892832513 (0.045749235923102)	-1.84825084501 (0.345227288495954)	0.388258450082 (0.951927641104628)	-1.84871533364 (0.0513846453079121)	2.09471169293 (0.283463463764833)	1.07833743581 (0.873419120143025)	-3.10325359099 (0.000534569004711735)	-3.59681996538 (0.000650299036521234)	3.35420487994 (0.00155640837673585)	-0.424500296409 (0.805160944727374)	1.89420734173 (0.0210319648367354)	-4.79997635768 (1.20184010206437e-05)	8.30598263605 (1.07306067924988e-08)	3.63449805233 (0.0248259857827396)	1.7749296226 (0.703938405436899)	-3.71038531862 (0.00361134767348389)	5.56655523422 (3.54054662938815e-06)	-3.71052142742 (0.0315679456333933)	3.22742831875 (0.0258818052499874)	-1.74659367183 (0.283902100456713)
SINE/tRNA.Sense	-1.03194212938 (0.713026452234511)	-0.547306579176 (0.985526977911403)	-0.132578768429 (0.998528378723249)	0 (0)	-0.880366373864 (0.58109583876128)	0 (0)	0.601210596878 (0.721629864469293)	0.718553040213 (0.347157573658604)	0 (0)	0 (0)	-0.186881945443 (0.95991385604475)	1.36340070367 (0.102229067491829)	0.348456978476 (0.721629864469293)	0 (0)	0.542067714885 (0.721629864469293)	0.619596528281 (0.43819952712628)	0 (0)	0 (0)	0 (0)	0 (0)	-0.644762191191 (0.620400969376515)	0 (0)	-0.405427281789 (0.985526977911403)	-0.39376470275 (0.620400969376515)	-0.0532492544349 (0.814664781406944)	2.37283488222 (0.0827076216174583)	-1.31912255325 (0.138530505154657)	1.31168310692 (0.120307176348745)	-0.684765693545 (0.607747354107421)	1.02466719012 (0.620400969376515)	-0.0573342602391 (0.991176342391935)	1.65156215805 (0.32683379758556)	0 (0)	0 (0)	0 (0)	0 (0)	0.0656092421579 (0.624652864075605)	1.20188709165 (0.248942388975482)	-0.692823718076 (0.498114899440756)	0.315259487524 (0.399927615138115)	-1.78508012988 (0.175451713395463)	0 (0)	0 (0)	0 (0)	-1.15615152809 (0.32683379758556)	0.903326463178 (0.620400969376515)	-1.2829485115 (0.32683379758556)	0.164187233239 (0.609883295442771)	-1.94863005198 (0.159200979930274)
SINE/tRNA-Deu.Sense	0 (0)	0.0252164047187 (0.529779728776358)	0 (0)	0 (0)	0 (0)	1.48293887467 (0)	0 (0)	0.24552991677 (0.458407944000844)	-0.90486065684 (0.772724154490336)	1.46243722781 (0)	0.310117003428 (0.620400969376515)	1.58810624869 (0)	0 (0)	0 (0)	0 (0)	0 (0)	0 (0)	0 (0)	0 (0)	0 (0)	-0.45555556347 (0.620400969376515)	0 (0)	-0.440968450129 (0.620400969376515)	0.222537443534 (0.458407944000844)	-0.0567555539131 (0.96556069577277)	-0.934469844256 (0.772724154490336)	-0.785328281259 (0.620400969376515)	0 (0)	-0.529258846374 (0.948056991160533)	1.3922755439 (0)	-0.883064760384 (0.948056991160533)	1.42104817639 (0)	-0.418693270188 (0.620400969376515)	0 (0)	0 (0)	0 (0)	0 (0)	0 (0)	0 (0)	-0.965152179758 (0.529779728776358)	-0.577657963809 (0.985526977911403)	0 (0)	0 (0)	-0.219691588089 (0.620400969376515)	0 (0)	1.72394120847 (0)	0 (0)	0 (0)	0 (0)
SINE/tRNA-RTE.Sense	-0.12288153691 (0.607747354107421)	1.12946857566 (0.32683379758556)	-1.59714434529 (0.120307176348745)	0.290642063516 (0.640574706964124)	-1.49724071023 (0.120307176348745)	3.68580653228 (0)	-1.36478651969 (0.392663358450598)	1.33597105976 (0.96556069577277)	-0.614666899132 (0.721627893959451)	2.69954419638 (0.102534226623944)	0 (0)	-1.09070541182 (0.1181785523955)	0 (0)	0 (0)	0.0806967740571 (0.720742921857703)	0 (0)	0 (0)	0 (0)	0 (0)	0 (0)	-0.911462944811 (0.71846917080085)	0 (0)	-1.25770512297 (0.271639871382637)	-1.39639464788 (0.65512177389999)	0.916502851446 (0.95170482248413)	-1.57456692132 (0.283948043272361)	-0.252773406132 (0.529779728776358)	1.33642109593 (0.518301287163426)	-0.3867526675 (0.96556069577277)	-0.83975881168 (0.567966864758368)	0.00532383624684 (0.969803848376914)	1.59994198697 (0.374879583036981)	-0.50590318398 (0.780497476618519)	-1.47527141553 (0.0356283994763139)	-0.497539500911 (0.985526977911403)	-0.484467294853 (0.694512165843948)	0.260773795441 (0.78133467039269)	0 (0)	0.0256006038426 (0.567966864758368)	-0.214353931413 (0.969803848376914)	0.111276499221 (0.923079509067139)	0 (0)	-1.32726410521 (0.110091879350348)	-0.457413698973 (0.543564680051891)	-1.03017813645 (0.149576002740082)	0 (0)	-0.594157592837 (0.708948812652512)	2.16967232838 (0.640574706964124)	-1.49575993149 (0.0262435791495232)
SINE?/tRNA.Sense	0 (0)	0 (0)	0 (0)	0 (0)	0 (0)	0 (0)	0 (0)	0 (0)	0 (0)	0 (0)	0 (0)	0 (0)	0 (0)	0 (0)	0 (0)	0 (0)	0 (0)	0 (0)	0 (0)	0 (0)	0 (0)	0 (0)	0 (0)	0 (0)	0 (0)	0 (0)	0 (0)	0 (0)	0 (0)	0 (0)	0 (0)	0 (0)	0 (0)	0 (0)	0 (0)	0 (0)	0 (0)	0 (0)	0 (0)	0 (0)	0 (0)	0 (0)	0 (0)	0 (0)	0 (0)	0 (0)	0 (0)	0 (0)	0 (0)
Satellite.Sense	0 (0)	-0.935319864244 (0.529779728776358)	0 (0)	0 (0)	0 (0)	0 (0)	0 (0)	0 (0)	-0.672449591589 (0.948056991160533)	0 (0)	-0.100040270139 (0.969803848376914)	0.458860859633 (0.529779728776358)	0 (0)	0 (0)	0 (0)	0 (0)	0 (0)	0 (0)	0 (0)	0 (0)	0 (0)	0 (0)	0 (0)	0 (0)	-1.67598385191 (0.458407944000844)	-1.11592531364 (0.772724154490336)	0 (0)	-1.12134983376 (0.772724154490336)	0 (0)	0 (0)	0 (0)	0 (0)	0 (0)	0 (0)	0 (0)	0 (0)	0 (0)	0 (0)	0 (0)	0 (0)	0 (0)	0 (0)	0 (0)	0 (0)	0 (0)	-1.17037485626 (0.458407944000844)	0 (0)	-0.352744109342 (0.992819294527051)	1.1003973606 (0)
Satellite/acro.Sense	0 (0)	0 (0)	0 (0)	0 (0)	0 (0)	0 (0)	0 (0)	0 (0)	0 (0)	0 (0)	0 (0)	0 (0)	0 (0)	0 (0)	0 (0)	0 (0)	0 (0)	0 (0)	0 (0)	0 (0)	0 (0)	0 (0)	0 (0)	0 (0)	0 (0)	0 (0)	0 (0)	0 (0)	0 (0)	0 (0)	0 (0)	0 (0)	0 (0)	0 (0)	0 (0)	0 (0)	0 (0)	0 (0)	0 (0)	0 (0)	0 (0)	0 (0)	0 (0)	0 (0)	0 (0)	0 (0)	0 (0)	0 (0)	0 (0)
Satellite/centr.Sense	0 (0)	0 (0)	0 (0)	0 (0)	0 (0)	0 (0)	0 (0)	0 (0)	0 (0)	0 (0)	0 (0)	0 (0)	0 (0)	0 (0)	0 (0)	0 (0)	0 (0)	0 (0)	0 (0)	0 (0)	0 (0)	0 (0)	0 (0)	0 (0)	0 (0)	0 (0)	0 (0)	0 (0)	0 (0)	0 (0)	0 (0)	0 (0)	0 (0)	0 (0)	0 (0)	0 (0)	0 (0)	0 (0)	0 (0)	0 (0)	0 (0)	0 (0)	0 (0)	0 (0)	0 (0)	0 (0)	0 (0)	0 (0)	0 (0)
Satellite/telo.Sense	0 (0)	0 (0)	0 (0)	0 (0)	0 (0)	0 (0)	0 (0)	0 (0)	0 (0)	0 (0)	0 (0)	0 (0)	0 (0)	0 (0)	0 (0)	0 (0)	0 (0)	0 (0)	0 (0)	0 (0)	0 (0)	0 (0)	0 (0)	0 (0)	0 (0)	0 (0)	0 (0)	0 (0)	0 (0)	0 (0)	0 (0)	0 (0)	0 (0)	0 (0)	0 (0)	0 (0)	0 (0)	0 (0)	0 (0)	0 (0)	0 (0)	0 (0)	0 (0)	0 (0)	0 (0)	0 (0)	0 (0)	0 (0)	0 (0)
Simple_repeat.Sense	1.1651113887 (0.179481599865027)	0.14340617511 (0.981163366836644)	0.290725901676 (0.520606835008076)	0.800828098106 (0.460041967425442)	1.02321340787 (0.590388104079487)	0.859490414124 (0.306840552981365)	0.771513258991 (0.710674046832512)	0.578589038041 (0.854894800738746)	0.810883519594 (0.772724154490336)	0.992940971416 (0.634210821648569)	4.87659583877 (0.0102794767235646)	-1.36068801578 (0.470964284466839)	-2.61624796712 (0.00303929835187288)	4.22621763255 (0.0179596813080015)	-0.306333096991 (0.394706070274946)	1.81122919952 (0.553518990640096)	-1.17894530113 (0.122508035301697)	-0.531338107426 (0.533342972041846)	-0.413520413374 (0.985526977911403)	1.24499657669 (0.401261579803998)	-1.71454945482 (0.160101907633949)	5.93586330835 (0.00847980903925515)	-1.46453512863 (0.219634658304282)	2.01331134183 (0.118716173476231)	-4.13991602344 (0.000379067920046953)	4.71604639606 (6.54909496913065e-05)	-3.43790098448 (0.00264224371027104)	2.93788498569 (0.00103628678954737)	-1.8728330788 (0.496806336948786)	0.734706086172 (0.77194104612546)	-0.644258073955 (0.301525380034143)	0.367673855045 (0.372112366673082)	-4.42431928425 (0.00292282555398576)	3.2270318376 (0.0206289830657618)	2.85389694491 (0.0662318254072098)	-0.653401225799 (0.428451897723294)	-3.63757120241 (0.00824446877770051)	1.98324989056 (0.177126362443693)	-1.58479771737 (0.876964830520553)	2.31496463852 (0.109706790275937)	-4.66449996111 (1.45298404939357e-06)	10.4497036538 (5.27303269117665e-10)	1.58682244894 (0.439712090250042)	-0.478969360269 (0.101857827872816)	-2.54108547081 (0.0557344758641056)	5.03153826221 (0.000950805566998906)	-2.44353892021 (0.0233135543985886)	2.68727186345 (0.0636937172087149)	1.45451098268 (0.277961703734831)
Unknown.Sense	-0.501746214969 (0.498114899440756)	1.53093425707 (0.498114899440756)	-0.500930266258 (0.966889689960211)	0 (0)	0.834892798468 (0.0917114476470364)	0 (0)	0.918611853409 (0.0917114476470364)	0 (0)	-0.211105434222 (0.996737595934381)	0 (0)	-0.26357505818 (0.772724154490336)	-0.592260808283 (0.691064143072392)	-0.478642403862 (0.667100977199253)	0 (0)	-0.518018170212 (0.667100977199253)	-0.111074289484 (0.997272477551581)	0 (0)	0 (0)	0 (0)	0 (0)	0 (0)	0 (0)	0 (0)	-0.119926689619 (0.999214119588923)	-0.670426683525 (0.985526977911403)	2.62665847738 (0)	-0.184885981548 (0.720742921857703)	0 (0)	-0.123201914278 (0.933570865909928)	0 (0)	-1.41644138121 (0.236157410319071)	-0.650160111032 (0.949931857601279)	-0.034818097201 (0.998670735114156)	0 (0)	0 (0)	0 (0)	-0.303345486337 (0.786556308001517)	1.16312539401 (0.620400969376515)	0 (0)	3.59766994433 (0)	-0.132409577948 (0.936653900381669)	-1.34726727146 (0.404951645954512)	-0.0998370126261 (0.966889689960211)	0.0785380559176 (0.948056991160533)	0.806708670139 (0.0917114476470364)	0 (0)	0.46867932785 (0.120307176348745)	3.51535270522 (0)	-1.09489257355 (0.362046798662895)
rRNA.Sense	-0.301284212202 (0.969803848376914)	-0.355565187587 (0.969803848376914)	-0.345055307396 (0.948056991160533)	0 (0)	0 (0)	0 (0)	-0.733444193699 (0.620400969376515)	1.08939480573 (0.620400969376515)	0 (0)	0 (0)	0 (0)	0 (0)	0 (0)	0 (0)	0 (0)	0 (0)	0 (0)	0 (0)	0 (0)	0 (0)	0 (0)	0 (0)	0 (0)	0 (0)	0 (0)	0 (0)	0 (0)	0 (0)	0 (0)	-0.599459630765 (0.691064143072392)	0 (0)	-0.627641881373 (0.691064143072392)	0 (0)	0 (0)	0 (0)	0 (0)	0.65634092802 (0.195248220393825)	0 (0)	0 (0)	0 (0)	-0.718995042284 (0.966889689960211)	0 (0)	0 (0)	-0.726904336287 (0.966889689960211)	-0.413299372506 (0.948056991160533)	0 (0)	-0.417964114965 (0.948056991160533)	0.988478397609 (0.620400969376515)	0 (0)
scRNA.Sense	0 (0)	0 (0)	-0.728518779957 (0.772724154490336)	-0.611144392829 (0.974880615639352)	0 (0)	0 (0)	-0.00266092962908 (0.985526977911403)	-0.445268287229 (0.966889689960211)	0 (0)	0 (0)	0 (0)	-1.2845095774 (0.458407944000844)	0 (0)	0 (0)	0 (0)	-0.103731672598 (0.96556069577277)	0 (0)	0 (0)	0 (0)	0 (0)	0 (0)	-0.773692972433 (0.966889689960211)	0 (0)	0 (0)	-0.948565425273 (0.401046501814499)	0 (0)	0 (0)	-0.343755712511 (0.929883137979317)	0 (0)	0 (0)	0 (0)	-1.05542751759 (0.32683379758556)	0 (0)	-0.621293194802 (0.985526977911403)	0.997209975308 (0.362046798662895)	0.877128128026 (0.620400969376515)	0 (0)	0 (0)	-0.369289924848 (0.966889689960211)	0 (0)	0 (0)	0 (0)	0 (0)	0 (0)	0 (0)	0.80505713621 (0.620400969376515)	0.639129040204 (0.401046501814499)	0.224245379418 (0.96556069577277)	-0.446099984993 (0.974880615639352)
snRNA.Sense	-0.785389501398 (0.71846917080085)	0 (0)	0 (0)	0 (0)	-0.643650142816 (0.918289342525419)	0 (0)	0 (0)	-0.0906293923063 (0.997272477551581)	-0.669457137421 (0.458407944000844)	3.34567985149 (0)	0 (0)	-0.761123462541 (0.195248220393825)	-0.353022647122 (0.992819294527051)	0 (0)	-0.287148400177 (0.96556069577277)	1.26233351585 (0.620400969376515)	0 (0)	0 (0)	0 (0)	0 (0)	-0.745199248641 (0.32683379758556)	3.34532319443 (0)	-0.694995656706 (0.256431750593046)	-0.636641007385 (0.772724154490336)	-0.814102275263 (0.772724154490336)	1.43234043547 (0.620400969376515)	-0.770156639161 (0.458407944000844)	3.67126450334 (0)	-0.575322921873 (0.362046798662895)	0.050593551094 (0.593692717635786)	-0.265283254996 (0.765675447308762)	2.10587815339 (0.168704787147562)	-0.678259151008 (0.256431750593046)	1.34298770564 (0.620400969376515)	-0.718990050894 (0.195248220393825)	-0.718017206206 (0.195248220393825)	-0.930323507024 (0.253282964562478)	0 (0)	0 (0)	0 (0)	-0.674738401417 (0.158742499156659)	3.2774957688 (0)	1.20208944674 (0.620400969376515)	-0.719484896072 (0.229204317477912)	-0.849233069005 (0.0959530499614643)	1.55502308697 (0.168704787147562)	-0.0644776487863 (0.988499718164006)	0.471317363771 (0.593692717635786)	-0.56525067115 (0.992819294527051)
srpRNA.Sense	0 (0)	0 (0)	0 (0)	-0.632794502328 (0.620400969376515)	0 (0)	0 (0)	0 (0)	-0.645794577254 (0.620400969376515)	0 (0)	-0.63564550593 (0.985526977911403)	0 (0)	0 (0)	0 (0)	0 (0)	0 (0)	0 (0)	0 (0)	0 (0)	0 (0)	0 (0)	0 (0)	1.8259002718 (0)	0 (0)	1.81510198746 (0)	0 (0)	0 (0)	-0.538751506698 (0.620400969376515)	1.87235920764 (0)	0 (0)	-0.632493109689 (0.985526977911403)	-0.646543385665 (0.985526977911403)	-0.65503389972 (0.985526977911403)	0.646400328863 (0.195248220393825)	1.79501343121 (0)	1.80462215019 (0)	0 (0)	0 (0)	0 (0)	0 (0)	0 (0)	-0.522446201676 (0.620400969376515)	0 (0)	-0.548881896109 (0.620400969376515)	-0.537221181729 (0.620400969376515)	0 (0)	0 (0)	0 (0)	0 (0)	-0.657327544542 (0.620400969376515)
tRNA.Sense	0 (0)	0.324873816077 (0.620400969376515)	0 (0)	-1.46065771708 (0.620400969376515)	0 (0)	0 (0)	0 (0)	0 (0)	0 (0)	0 (0)	-0.244384136146 (0.772724154490336)	0 (0)	0 (0)	0 (0)	0 (0)	0 (0)	0 (0)	0 (0)	0 (0)	0 (0)	0 (0)	1.05803426613 (0)	0 (0)	0.00208410208384 (0.620400969376515)	0 (0)	1.02499688131 (0)	0 (0)	1.01979078104 (0)	0 (0)	1.02202253552 (0)	0 (0)	0 (0)	0 (0)	0 (0)	0 (0)	0 (0)	0 (0)	-0.227116140713 (0.772724154490336)	0 (0)	0 (0)	0 (0)	1.03667491128 (0)	0.997898707833 (0)	0 (0)	0 (0)	1.06308210837 (0)	0 (0)	1.04094931911 (0)	-1.06018474691 (0.985526977911403)
DNA.Antisense	0 (0)	-0.483402528227 (0.983463376571664)	-0.45729971214 (0.983463376571664)	0 (0)	0 (0)	0 (0)	0 (0)	0 (0)	-0.764957978765 (0.948056991160533)	0 (0)	0 (0)	0 (0)	0.1948438904 (0.560454802734621)	0 (0)	0.256897873952 (0.2831004322904)	0.819422506285 (0.220833877924233)	0 (0)	0 (0)	0 (0)	0 (0)	-0.205903760653 (0.560454802734621)	0 (0)	-0.163837072706 (0.380599143406742)	-0.359166514838 (0.998831169253569)	1.12842432928 (0.380599143406742)	0.271143350931 (0.593692717635786)	0.150642701856 (0.560454802734621)	0 (0)	0.16944923225 (0.772724154490336)	0 (0)	-0.0849532206202 (0.985526977911403)	0 (0)	-0.183116816499 (0.546629560400987)	0 (0)	-0.500134959309 (0.985526977911403)	-0.256796614284 (0.995154535997734)	-0.730126725433 (0.374879583036981)	-0.987578192557 (0.529779728776358)	0 (0)	0 (0)	-0.658401203688 (0.176723197609264)	0 (0)	-0.752998366121 (0.529716924288701)	-0.725487350262 (0.321083634172005)	-0.818045907728 (0.772724154490336)	0 (0)	0 (0)	-2.54268576423 (0.207421851294866)	-0.235773526917 (0.984986489845573)
DNA/Kolobok.Antisense	0 (0)	0 (0)	0 (0)	0 (0)	0 (0)	0 (0)	0 (0)	0 (0)	0 (0)	0 (0)	0 (0)	0 (0)	0 (0)	0 (0)	0 (0)	0 (0)	0 (0)	0 (0)	0 (0)	0 (0)	0 (0)	0 (0)	0 (0)	0 (0)	0 (0)	0 (0)	0 (0)	0 (0)	0 (0)	0 (0)	0 (0)	0 (0)	0 (0)	0 (0)	0 (0)	0 (0)	0 (0)	0 (0)	0 (0)	0 (0)	0 (0)	0 (0)	0 (0)	0 (0)	0 (0)	0 (0)	0 (0)	0 (0)	0 (0)
DNA/MULE-MuDR.Antisense	0 (0)	0 (0)	0 (0)	0 (0)	0 (0)	0 (0)	0 (0)	0 (0)	0 (0)	0 (0)	0 (0)	0 (0)	0 (0)	0 (0)	0 (0)	0 (0)	0 (0)	0 (0)	0 (0)	0 (0)	0 (0)	0 (0)	0 (0)	0 (0)	0 (0)	0 (0)	0 (0)	0 (0)	0 (0)	0 (0)	0 (0)	0 (0)	0 (0)	0 (0)	0 (0)	0 (0)	0 (0)	0 (0)	0 (0)	0 (0)	0 (0)	0 (0)	0 (0)	0 (0)	0 (0)	0 (0)	0 (0)	0 (0)	0 (0)
DNA/Merlin.Antisense	0 (0)	0 (0)	1.05338279702 (0)	-0.995947684609 (0.985526977911403)	0 (0)	0 (0)	0 (0)	0 (0)	-1.06467886481 (0.985526977911403)	0 (0)	-1.08972488001 (0.985526977911403)	-0.0142915226899 (0.620400969376515)	0 (0)	0 (0)	0 (0)	0 (0)	0 (0)	0 (0)	0 (0)	0 (0)	-1.00413511469 (0.985526977911403)	0 (0)	-0.951395161835 (0.985526977911403)	0 (0)	1.07541990525 (0)	0 (0)	0 (0)	0 (0)	0 (0)	0 (0)	-1.03057027148 (0.985526977911403)	0 (0)	-0.0370941517111 (0.620400969376515)	1.00561365166 (0)	-1.02793914675 (0.985526977911403)	0.0211752665842 (0.620400969376515)	1.04568718523 (0)	0 (0)	0 (0)	0 (0)	-0.0101503268761 (0.620400969376515)	0 (0)	-1.00159839476 (0.985526977911403)	0.0215326097708 (0.620400969376515)	1.00755440451 (0)	0 (0)	0 (0)	0 (0)	1.012753719 (0)
DNA/PIF-Harbinger.Antisense	0 (0)	0 (0)	0 (0)	0 (0)	0 (0)	0 (0)	0 (0)	0 (0)	0 (0)	0 (0)	0 (0)	0 (0)	0 (0)	0 (0)	0 (0)	0 (0)	0 (0)	0 (0)	0 (0)	0 (0)	0 (0)	0 (0)	0 (0)	0 (0)	0 (0)	0 (0)	0 (0)	0 (0)	0 (0)	0 (0)	0 (0)	0 (0)	0 (0)	0 (0)	0 (0)	0 (0)	0 (0)	0 (0)	0 (0)	0 (0)	0 (0)	0 (0)	0 (0)	0 (0)	0 (0)	0 (0)	0 (0)	0 (0)	0 (0)
DNA/PiggyBac.Antisense	0 (0)	0 (0)	1.03331711235 (0)	0 (0)	0 (0)	0 (0)	0 (0)	0 (0)	0 (0)	0 (0)	0 (0)	0 (0)	0 (0)	0 (0)	0 (0)	0 (0)	0 (0)	0 (0)	0 (0)	0 (0)	0 (0)	0 (0)	0 (0)	0 (0)	0 (0)	0 (0)	0 (0)	0 (0)	-0.978661164767 (0.985526977911403)	0 (0)	-1.03628765876 (0.985526977911403)	-0.974415103875 (0.985526977911403)	0 (0)	0 (0)	0 (0)	0 (0)	0 (0)	0 (0)	0 (0)	-0.64608103102 (0.772724154490336)	0 (0)	0 (0)	-0.822435843128 (0.772724154490336)	0 (0)	-0.827916980694 (0.772724154490336)	0 (0)	-0.822452197352 (0.772724154490336)	0 (0)	0 (0)
DNA/TcMar.Antisense	0.134516064856 (0.985526977911403)	0 (0)	0 (0)	0 (0)	0 (0)	0 (0)	-0.652160193825 (0.772724154490336)	0.639705640295 (0.620400969376515)	-0.598693091935 (0.765675447308762)	0 (0)	-0.727540031909 (0.981163366836644)	0 (0)	0.638519905355 (0.494646163754437)	0 (0)	-0.715013827014 (0.667100977199253)	0 (0)	0 (0)	0 (0)	0 (0)	0 (0)	0 (0)	0 (0)	0 (0)	0 (0)	-0.748072348968 (0.529716924288701)	0 (0)	-0.534670798584 (0.974880615639352)	0 (0)	0 (0)	0 (0)	-0.826629193641 (0.32683379758556)	-0.84849953958 (0.32683379758556)	-0.594551271434 (0.620400969376515)	0 (0)	0 (0)	-0.715805462473 (0.620400969376515)	-0.335555493824 (0.475149159039679)	0 (0)	-0.138273186237 (0.998670735114156)	0.189531803339 (0.959192991684323)	-0.54104978131 (0.948056991160533)	0 (0)	-0.401821714975 (0.966889689960211)	-0.346946049097 (0.498114899440756)	1.48266829894 (0.236157410319071)	-0.941708450896 (0.593692717635786)	0.33907750687 (0.949931857601279)	0.18098645627 (0.988499718164006)	-1.32099428505 (0.297963142580019)
DNA/TcMar-Mariner.Antisense	2.46892464639 (0.297963142580019)	1.37774114591 (0.222437739989029)	0.449191797474 (0.662183326792649)	1.07091075054 (0.942900144974664)	-0.442429759619 (0.985526977911403)	0 (0)	-0.338168577656 (0.796857415873612)	0.192938008034 (0.967976077044769)	0.904194873501 (0.154978102643628)	1.87500347135 (0.154978102643628)	0.727437435835 (0.985526977911403)	3.70484392047 (0.0917114476470364)	0 (0)	0 (0)	-0.555420931886 (0.948056991160533)	0.692950423091 (0.470170423935782)	0 (0)	0 (0)	0 (0)	0 (0)	-0.216231554963 (0.362046798662895)	0 (0)	-0.235454130897 (0.362046798662895)	1.12110695627 (0.143565620666994)	-0.138296880101 (0.446536919826525)	0 (0)	-1.32190026276 (0.021346515832755)	4.16998771307 (0.102534226623944)	-0.534041734774 (0.925018765935301)	-0.112778007453 (0.93373414242575)	-0.593169485142 (0.387726352319837)	-0.322169800633 (0.995634039419256)	-0.487367169276 (0.972874800912586)	0.675026855437 (0.1528644356211)	0 (0)	0 (0)	-0.760256675902 (0.948056991160533)	-0.475788699886 (0.937960299921974)	-1.04232458056 (0.26679018063874)	0 (0)	-0.365687761045 (0.697507798990622)	0 (0)	-0.858252098826 (0.955755974235439)	-0.39322900421 (0.96556069577277)	-0.703711670129 (0.406512464704338)	5.059341625 (0)	-1.03634958583 (0.547774665422162)	2.99314476201 (0.620400969376515)	-1.32201283269 (0.647914869140452)
DNA/TcMar-Pogo.Antisense	0 (0)	0 (0)	0 (0)	0 (0)	0 (0)	0 (0)	0 (0)	0 (0)	0 (0)	0 (0)	0 (0)	0 (0)	0 (0)	0 (0)	0 (0)	0 (0)	0 (0)	0 (0)	0 (0)	0 (0)	0 (0)	0 (0)	0 (0)	0 (0)	0 (0)	0 (0)	0 (0)	0 (0)	0 (0)	0 (0)	0 (0)	0 (0)	0 (0)	0 (0)	0 (0)	0 (0)	0 (0)	0 (0)	0 (0)	0 (0)	0 (0)	0 (0)	0 (0)	0 (0)	0 (0)	0 (0)	0 (0)	0 (0)	0 (0)
DNA/TcMar-Tc1.Antisense	-0.64364739677 (0.985526977911403)	0 (0)	0 (0)	1.67502932928 (0)	0 (0)	0 (0)	0 (0)	-0.482989524596 (0.948056991160533)	0 (0)	0 (0)	0 (0)	-0.463451812641 (0.985526977911403)	0 (0)	-0.505834593347 (0.948056991160533)	0 (0)	-0.479021847465 (0.948056991160533)	0 (0)	0 (0)	0 (0)	0 (0)	0 (0)	0 (0)	0 (0)	-0.768715922274 (0.691064143072392)	0.74773428903 (0.176723197609264)	0 (0)	-0.250863307018 (0.985526977911403)	-0.723667822898 (0.929883137979317)	0 (0)	0.844208067553 (0.620400969376515)	-1.71573520772 (0.362046798662895)	-0.3117476978 (0.985526977911403)	-0.479207447558 (0.772724154490336)	0 (0)	0 (0)	-0.509251647436 (0.772724154490336)	0.849397949203 (0.529779728776358)	0.838498063418 (0.529779728776358)	0 (0)	0 (0)	-0.245691580778 (0.969803848376914)	0 (0)	0 (0)	-0.221777710242 (0.969803848376914)	0 (0)	0 (0)	0 (0)	0 (0)	0 (0)
DNA/TcMar-Tc2.Antisense	-0.616365809175 (0.985526977911403)	-0.712667318674 (0.963940541668787)	-1.09011425717 (0.458407944000844)	0 (0)	0 (0)	0 (0)	-1.21706291675 (0.220833877924233)	-0.964108443658 (0.691064143072392)	-0.331804012855 (0.998670735114156)	-0.796229505051 (0.772724154490336)	0.413276530764 (0.65512177389999)	-0.844911363015 (0.772724154490336)	0 (0)	0 (0)	0 (0)	0 (0)	0 (0)	0 (0)	0 (0)	0 (0)	0 (0)	0 (0)	0 (0)	-0.540296483041 (0.971836721090039)	-1.25275863178 (0.560454802734621)	0.0588518748304 (0.910854725837749)	-1.11915488018 (0.560454802734621)	0 (0)	-1.2660371226 (0.220833877924233)	0.194723836105 (0.985526977911403)	-1.37681809376 (0.220833877924233)	-0.942349254217 (0.910854725837749)	-0.994721526165 (0.65512177389999)	0 (0)	0 (0)	-0.93024141022 (0.65512177389999)	0.122767384391 (0.708948812652512)	0 (0)	0 (0)	-0.216290287078 (0.2831004322904)	0.581999003013 (0.948056991160533)	-0.289969687057 (0.910854725837749)	-1.02554309458 (0.560454802734621)	-1.02141225294 (0.560454802734621)	-0.978882204724 (0.560454802734621)	0 (0)	-1.03966230245 (0.404951645954512)	-0.662524791409 (0.936653900381669)	1.35143909965 (0.38277121739917)
DNA/TcMar-Tigger.Antisense	-0.80520368318 (0.749256925242705)	-0.235156581333 (0.917729007167511)	-0.500581331988 (0.994915768575355)	-0.777934571683 (0.96556069577277)	-0.412274894886 (0.407726248828888)	-1.17967873938 (0.177404344029231)	-1.19984490767 (0.0099639503420378)	2.39112281474 (0.248622359930308)	-1.86343768102 (0.0444040236456334)	2.22612452302 (0.679149224760142)	-2.26286568813 (0.132716489764072)	0.000293988484223 (0.360295747575528)	-0.48438691081 (0.980814090134364)	3.22269455713 (0.965763680522156)	-0.945909358619 (0.534251936394062)	1.86140051391 (0.47276217984517)	-0.292795054974 (0.983463376571664)	0 (0)	0 (0)	0 (0)	-0.77418155889 (0.10682017530339)	1.92149927908 (0.299308534668221)	-0.113727243756 (0.931497722800975)	0.727362391617 (0.991306781783762)	-0.953045001879 (0.667100977199253)	0.983011088646 (0.85088245229514)	-0.493196796107 (0.347572897761585)	0.971685327508 (0.186211242784634)	0.237575371314 (0.513471143058151)	1.03526708925 (0.72630803242457)	-0.578345532788 (0.96556069577277)	0.237888408226 (0.988497885386074)	-2.23652429723 (0.0382130617290417)	2.12784920765 (0.81033401168479)	-0.37048797907 (0.986922948141881)	-1.57736709177 (0.222873034772358)	-0.872917931664 (0.963922181168781)	0.484591838504 (0.977406091594051)	-0.143092053557 (0.492736478573107)	-1.69148851569 (0.163541303209671)	-1.23238839861 (0.560454802734621)	2.78715588821 (0.732782483132135)	-0.410272553159 (0.881934062430174)	-1.24794154527 (0.526855735162992)	-0.995890081503 (0.147887810574532)	1.78132986363 (0.226927591663242)	-0.339393819952 (0.820637357920873)	1.32436526056 (0.529779728776358)	-0.267656533426 (0.0998098623680268)
DNA/TcMar?.Antisense	0 (0)	0 (0)	0 (0)	0 (0)	0 (0)	0 (0)	0 (0)	0 (0)	0 (0)	0 (0)	0 (0)	0 (0)	0 (0)	0 (0)	0 (0)	0 (0)	0 (0)	0 (0)	0 (0)	0 (0)	0 (0)	0 (0)	0 (0)	0 (0)	0 (0)	0 (0)	0 (0)	0 (0)	0 (0)	0 (0)	0 (0)	0 (0)	0 (0)	0 (0)	0 (0)	0 (0)	0 (0)	0 (0)	0 (0)	0 (0)	0 (0)	0 (0)	0 (0)	0 (0)	0 (0)	0 (0)	0 (0)	0 (0)	0 (0)
DNA/hAT.Antisense	0 (0)	-0.839823066027 (0.607747354107421)	0.0586640370786 (0.305308119744)	-1.20983039553 (0.32683379758556)	0 (0)	0 (0)	-1.00689441436 (0.677444187837339)	0.306472277737 (0.96556069577277)	0 (0)	0 (0)	-0.460466206234 (0.999996769956)	0 (0)	0 (0)	0 (0)	-0.474811506971 (0.985851744396963)	0 (0)	0 (0)	0 (0)	0 (0)	0 (0)	0 (0)	0 (0)	0 (0)	1.84542983973 (0.285435540069401)	-1.39128854595 (0.207421851294866)	0.224692019809 (0.969803848376914)	-0.59682812904 (0.942900144974664)	-0.976590041876 (0.65512177389999)	1.52273296323 (0.312543065773741)	0 (0)	0.0180205082724 (0.990186477244628)	-0.311112909974 (0.980681888714816)	0 (0)	0 (0)	0 (0)	0 (0)	-0.914802033762 (0.923713736222587)	0.538212721752 (0.483833426325523)	-0.623384222672 (0.529779728776358)	-0.174122339479 (0.989550444409414)	-0.882093584006 (0.944802259743775)	0 (0)	-0.895705525437 (0.944802259743775)	-0.880398738243 (0.944802259743775)	-0.831448566749 (0.529716924288701)	1.05924117697 (0.458407944000844)	-1.13997483979 (0.677444187837339)	2.13490189137 (0.0160192959701471)	-1.03358214152 (0.362046798662895)
DNA/hAT-Ac.Antisense	0.252917182379 (0.645166585545093)	-0.134138634402 (0.985526977911403)	-0.382442684013 (0.992819294527051)	1.8296640456 (0.220354472568796)	-0.365254876131 (0.984347116891329)	0 (0)	-1.26318259395 (0.143591961788563)	-0.056134920436 (0.648088196752506)	-1.25837434163 (0.0968717516691344)	0.0567295432363 (0.944802259743775)	-0.659437645776 (0.980814090134364)	2.97593709517 (0.400618956960024)	-0.687466955391 (0.579416446362998)	0 (0)	-0.959451630926 (0.103918301012454)	0.318579467027 (0.925925002466604)	0 (0)	0 (0)	0 (0)	0 (0)	-0.559994351228 (0.507015946212032)	0.725997624041 (0.417742174751103)	-0.772781781424 (0.208730427727083)	0.513026487438 (0.944802259743775)	-0.519209649676 (0.918289342525419)	-0.249314234001 (0.954147586447755)	0.0523582085048 (0.966889689960211)	1.699473071 (0.957932233831341)	-0.621360782639 (0.631164936882958)	2.32777278421 (0.0685645484824901)	0.0460706381029 (0.63348765234109)	0.715237172152 (0.97178963873695)	-0.854041997816 (0.272983641370601)	-1.05903478091 (0.229567022993505)	-0.406375323872 (0.985526977911403)	-0.954236061523 (0.166166195453258)	-0.14720886128 (0.788722552763239)	0.169797759242 (0.578195656983723)	1.38221962114 (0.134779209678779)	-0.531292886855 (0.949931857601279)	-0.914537215575 (0.44095877622858)	0 (0)	-0.250536215531 (0.999996769956)	-0.0445513005314 (0.984120034147507)	-0.354684194858 (0.992819294527051)	1.55737149636 (0.362046798662895)	0.397032971187 (0.985526977911403)	-1.95443929663 (0.292087095061073)	-1.56176461487 (0.169106733478268)
DNA/hAT-Blackjack.Antisense	-1.16158881524 (0.458407944000844)	-0.490897150176 (0.969803848376914)	-0.749621372955 (0.458407944000844)	0.235952674671 (0.294014820056601)	-0.44103395145 (0.765675447308762)	0 (0)	0.205603514951 (0.765675447308762)	-0.749436892971 (0.732272586910695)	0.285783446859 (0.676820460489732)	0 (0)	0.0113420174097 (0.985526977911403)	0 (0)	-0.527636435845 (0.9347944632038)	0.642612942502 (0.532049250941643)	-0.238268384407 (0.974880615639352)	0.624405746516 (0.973305314492505)	0 (0)	0 (0)	0 (0)	0 (0)	0.27787353117 (0.596044335356085)	2.69335064656 (0.0189315537942322)	-0.238706084243 (0.995154535997734)	0.706979763711 (0.620400969376515)	-0.309379601927 (0.999996769956)	1.05036345219 (0.392663358450598)	-0.562329949443 (0.992819294527051)	2.3336908885 (0.228448581829753)	-0.819838864003 (0.136031189431364)	4.60845029367 (0)	0.272620138129 (0.984870471079977)	0.297763041885 (0.746969416683755)	-0.296465234769 (0.985526977911403)	1.89338699554 (0.286364365362342)	0 (0)	-1.54181907796 (0.201174590040255)	-0.565192774262 (0.755436927930892)	-0.671776928094 (0.948056991160533)	-0.562340500822 (0.910854725837749)	-0.599058162384 (0.741040489656191)	0.403976704808 (0.715722043233961)	1.4734920263 (0.30764095203104)	1.31848992048 (0.137854430556934)	0.312134546206 (0.752035454257625)	-1.25810394212 (0.307275594624068)	0 (0)	-1.46561447733 (0.108613281051652)	-0.623923311107 (0.948056991160533)	0.963514531352 (0.480482679614344)
DNA/hAT-Charlie.Antisense	-1.86233764005 (0.256653887140061)	0.888276115026 (0.269446385089185)	-1.1904809452 (0.364887412259914)	2.15925561638 (0.186959090542068)	-0.873912378482 (0.955755974235439)	-0.798544971826 (0.691064143072392)	-0.655067525653 (0.802284172083472)	-1.01196303881 (0.728376282509516)	-2.7380089507 (0.0801874228080109)	0.646118879467 (0.378047427972342)	-2.67104728862 (0.0711838657373845)	-1.70698761137 (0.3966054757632)	-1.06125314353 (0.4501079617286)	1.73903524212 (0.648826428231856)	-1.12008157222 (0.98408622668599)	1.52861106189 (0.974609771122058)	-0.322548820983 (0.985526977911403)	2.0035915431 (0.122704891443741)	-0.23183074014 (0.985526977911403)	0 (0)	-1.76299519049 (0.118453275544855)	5.72326331107 (0.0169807043669559)	-2.15269478785 (0.0790168547880585)	-1.16770211051 (0.909229694515624)	-1.65238494291 (0.168713246340175)	4.59592963169 (0.387099607718684)	-1.22047857963 (0.225405090843787)	1.74164468329 (0.403101332333177)	-1.34923027413 (0.661268446918911)	-0.039354903315 (0.929883137979317)	-1.6282055528 (0.0207498568361414)	-0.802514519494 (0.161287538948724)	-2.03363812127 (0.00377054255342549)	3.50971724475 (0.253282964562478)	1.47763635171 (0.714779667534)	-2.46503589831 (1.31953717362475e-05)	-1.49424397671 (0.0432243256217959)	4.11980771641 (0.0815104386440411)	-1.12992778763 (0.489425220417307)	0.850325673204 (0.300596550791841)	-1.88690467775 (0.000106505073150742)	5.83714883823 (0.065403612530061)	0.424443104442 (0.986575592556593)	-0.773429398328 (0.00989913817868814)	-0.879537728031 (0.0403152308767152)	3.50653711364 (0.0168250308715523)	-1.38694751067 (0.134333420043609)	1.03230005445 (0.590085560546817)	0.464954467709 (0.801249315830782)
DNA/hAT-Tag1.Antisense	0 (0)	0 (0)	0 (0)	-1.5730956759 (0.404951645954512)	1.6979519092 (0)	0 (0)	0.324753910616 (0.974880615639352)	-0.59021797383 (0.974880615639352)	-0.0313212190846 (0.620400969376515)	0 (0)	0.527947269912 (0.620400969376515)	1.71428633568 (0)	1.62960330159 (0)	0 (0)	0 (0)	0 (0)	0 (0)	0 (0)	0 (0)	0 (0)	-0.346499674063 (0.966889689960211)	0 (0)	0.616310236458 (0.498114899440756)	0 (0)	1.91451928715 (0)	-0.759433870619 (0.675059980902718)	1.79599570382 (0)	0 (0)	0 (0)	0 (0)	0 (0)	0 (0)	-0.0874975435524 (0.620400969376515)	0 (0)	0 (0)	-1.33335048467 (0.32683379758556)	-0.69106674441 (0.32683379758556)	-0.252637525314 (0.772724154490336)	-0.575195429141 (0.576709418118871)	-0.503996087737 (0.974880615639352)	-0.390064336752 (0.969803848376914)	0 (0)	0 (0)	-0.735060186047 (0.129359747344243)	-0.252225721736 (0.978192512500661)	0 (0)	0.00370117617836 (0.32683379758556)	-0.534420441979 (0.974880615639352)	-1.79722738995 (0.297963142580019)
DNA/hAT-Tip100.Antisense	0.0166506007496 (0.376532307123733)	0.555197599206 (0.0735295740282318)	-0.282443081534 (0.978083993946972)	1.63074996785 (0.527863258515007)	1.11256071215 (0.0968717516691344)	0 (0)	0.733943118481 (0.144740567777621)	-0.11226119022 (0.981163366836644)	-0.671600561093 (0.620400969376515)	-1.06874576683 (0.772724154490336)	-0.867815452264 (0.0940531436775419)	-1.29388531939 (0.106814239124691)	0.789223055396 (0.697428007839833)	0 (0)	0.816148409009 (0.65512177389999)	2.56364429265 (0.428305830573776)	0.463211277483 (0.547774665422162)	0 (0)	0 (0)	0 (0)	-0.117595324142 (0.915140306940361)	0.769639799755 (0.125153050574244)	-0.274228293811 (0.985526977911403)	3.05784612556 (0.0485801432689846)	-0.901942115056 (0.948056991160533)	1.03937481411 (0.274125252389041)	-0.757468568757 (0.720627845358537)	5.3863689388 (0.0439833505343692)	-0.731153163313 (0.1071948695321)	6.15071686563 (0.0453147147147147)	0.215639413529 (0.908859709166782)	1.56934527626 (0.856329068551575)	-0.741373234386 (0.476870104981962)	0.376739689837 (0.31245203465546)	0.786756792734 (0.925018765935301)	0.567413554266 (0.580309512144177)	-0.216229105121 (0.982756212567467)	3.55901685497 (0.107347729232335)	-0.0722683255172 (0.832988518112009)	-0.54894053725 (0.691064143072392)	-0.346664921813 (0.969803848376914)	2.27384771839 (0.280822722821265)	-0.801207176086 (0.475099778352253)	0.830143492404 (0.582990048488492)	-0.523247389191 (0.835395210561808)	0.89221344528 (0.130351652743368)	-0.249371997489 (0.947560734998593)	1.77876311356 (0.112766440346475)	-0.926236026155 (0.670427797591494)
DNA/hAT-Tip100?.Antisense	0 (0)	0 (0)	1.83293168311 (0)	0 (0)	-0.194931075814 (0.529779728776358)	0 (0)	0 (0)	0 (0)	0 (0)	0 (0)	0 (0)	0 (0)	0 (0)	0 (0)	0 (0)	0 (0)	0 (0)	0 (0)	0 (0)	0 (0)	-0.239128200246 (0.529779728776358)	0 (0)	-0.22497393215 (0.529779728776358)	0 (0)	-0.378806540458 (0.620400969376515)	1.81559792898 (0)	-0.425495173325 (0.985526977911403)	-0.755869631797 (0.620400969376515)	-0.21804234016 (0.529779728776358)	0 (0)	0 (0)	0 (0)	-0.222812513603 (0.529779728776358)	0 (0)	0 (0)	0 (0)	-0.38558700208 (0.720742921857703)	0 (0)	-0.378053621369 (0.948056991160533)	0 (0)	-0.434476614327 (0.620400969376515)	0 (0)	0 (0)	-0.400104562077 (0.620400969376515)	0 (0)	0 (0)	0 (0)	0 (0)	0 (0)
DNA/hAT?.Antisense	0 (0)	0 (0)	0 (0)	0 (0)	0 (0)	0 (0)	0 (0)	0 (0)	0 (0)	0 (0)	0 (0)	0 (0)	0 (0)	0 (0)	0 (0)	0 (0)	0 (0)	0 (0)	0 (0)	0 (0)	0 (0)	0 (0)	0 (0)	0 (0)	0 (0)	0 (0)	0 (0)	0 (0)	0 (0)	0 (0)	0 (0)	0 (0)	0 (0)	0 (0)	0 (0)	0 (0)	0 (0)	0 (0)	0 (0)	0 (0)	0 (0)	0 (0)	0 (0)	0 (0)	0 (0)	0 (0)	0 (0)	0 (0)	0 (0)
DNA?.Antisense	-0.862773760704 (0.772724154490336)	2.17817935352 (0.32683379758556)	0 (0)	-0.291934699136 (0.96556069577277)	0.668970904213 (0.576063162117419)	0 (0)	0.741868235858 (0.964539934575833)	-0.689511198416 (0.810791966469047)	-0.566663114235 (0.974880615639352)	0 (0)	-0.577579925657 (0.974880615639352)	-0.816732374306 (0.120307176348745)	0 (0)	0 (0)	0 (0)	0 (0)	0 (0)	0 (0)	0 (0)	0 (0)	0.152889783039 (0.998670735114156)	0 (0)	0.161657149262 (0.998670735114156)	0 (0)	-0.901244790236 (0.143565620666994)	-0.411424691574 (0.931083169881962)	-0.858690735577 (0.362046798662895)	-0.746882224486 (0.810791966469047)	0.0510914366189 (0.998214857523328)	-0.767884309237 (0.708044705379905)	2.21674683399 (0.344621889268727)	-0.834097166448 (0.708044705379905)	-0.724035588347 (0.546629560400987)	0.0720745998565 (0.529779728776358)	0.0450417126722 (0.529779728776358)	-0.772710485979 (0.207421851294866)	-0.389377549706 (0.985526977911403)	-0.657178531297 (0.985526977911403)	0.0676220880984 (0.646646008020416)	0 (0)	-0.88592410349 (0.0714914456017303)	0 (0)	0 (0)	-0.912896807523 (0.157398673905049)	-0.0069233618582 (0.236628315400852)	0 (0)	-0.473961444478 (0.974880615639352)	-0.597749680927 (0.620400969376515)	-0.907897562012 (0.184891145557651)
DNA?/PiggyBac?.Antisense	0 (0)	0 (0)	0 (0)	0 (0)	0 (0)	0 (0)	0 (0)	0 (0)	0 (0)	0 (0)	0 (0)	0 (0)	0 (0)	0 (0)	0 (0)	0 (0)	0 (0)	0 (0)	0 (0)	0 (0)	0 (0)	0 (0)	0 (0)	0 (0)	0 (0)	0 (0)	0 (0)	0 (0)	0 (0)	0 (0)	0 (0)	0 (0)	0 (0)	0 (0)	0 (0)	0 (0)	0 (0)	0 (0)	0 (0)	0 (0)	0 (0)	0 (0)	0 (0)	0 (0)	0 (0)	0 (0)	0 (0)	0 (0)	0 (0)
DNA?/hAT-Tip100?.Antisense	0 (0)	0 (0)	0 (0)	0 (0)	0 (0)	0 (0)	0 (0)	0 (0)	0 (0)	0 (0)	0 (0)	0 (0)	0 (0)	0 (0)	0 (0)	0 (0)	0 (0)	0 (0)	0 (0)	0 (0)	0 (0)	0 (0)	0 (0)	0 (0)	0 (0)	0 (0)	0 (0)	0 (0)	0 (0)	0 (0)	0 (0)	0 (0)	0 (0)	0 (0)	0 (0)	0 (0)	0 (0)	0 (0)	0 (0)	0 (0)	0 (0)	0 (0)	0 (0)	0 (0)	0 (0)	0 (0)	0 (0)	0 (0)	0 (0)
LINE/CR1.Antisense	-1.06633815023 (0.401046501814499)	1.9108450854 (0.779034338009996)	-0.417721761943 (0.679388731565141)	-0.00228942917518 (0.998302648038311)	2.36984949934 (0.365853669025488)	0.26867197442 (0.607747354107421)	1.88867957796 (0.985526977911403)	2.48565813947 (0.0615973044572696)	1.88229953168 (0.754510241978875)	-0.660210928994 (0.389741620736868)	5.53252252733 (0.399927615138115)	-1.10885039123 (0.411469699976389)	-0.92382881053 (0.0735295740282318)	4.81558196976 (0.179858097231508)	0.976317346212 (0.537098049931069)	2.26683521384 (0.0222155432154245)	-0.373209336972 (0.985526977911403)	-0.264716409111 (0.980814090134364)	0 (0)	0 (0)	1.83554854468 (0.908010640904172)	-0.116549677224 (0.974880615639352)	2.21387409538 (0.425439348517162)	-1.14615030646 (0.750819475109925)	-2.09258056324 (0.0419916545311188)	-0.37610994995 (0.985526977911403)	-0.866301750735 (0.705195494976534)	0.234188869067 (0.988364283517713)	1.45907681591 (0.998670735114156)	1.13456553716 (0.584569008631571)	1.3926784152 (0.31736942189304)	-0.478169236363 (0.572400378239615)	-1.25187029874 (0.0507976460992351)	1.12335446657 (0.622278469913117)	0.176150121054 (0.999996769956)	-0.996815907488 (0.310774921074538)	-0.830315632633 (0.978083993946972)	-1.26096641913 (0.676803233088458)	-0.638236426396 (0.869428837817562)	1.02584977525 (0.126645355710003)	-1.51800838301 (0.0558520174374268)	2.43397573544 (0.155457681775332)	-0.822497766457 (0.989847701451366)	-1.06982722467 (0.732725891724895)	-0.900768658874 (0.308407908785213)	-0.282820731087 (0.569213134243458)	-0.638172594939 (0.4780819639426)	-1.55720788828 (0.573904764223241)	-1.42359484841 (0.646727565032259)
LINE/Dong-R4.Antisense	0 (0)	0 (0)	0 (0)	0 (0)	0 (0)	0 (0)	0 (0)	0 (0)	-1.20794560567 (0.529779728776358)	0 (0)	0 (0)	0 (0)	0 (0)	0 (0)	0.0805268935064 (0.772724154490336)	0 (0)	0 (0)	0 (0)	0 (0)	0 (0)	0 (0)	0 (0)	0 (0)	0 (0)	-1.33711640078 (0.772724154490336)	0 (0)	-1.30306238325 (0.772724154490336)	0 (0)	0 (0)	0 (0)	0 (0)	0 (0)	0 (0)	0 (0)	0 (0)	0 (0)	0 (0)	1.26047188735 (0)	0 (0)	0 (0)	0 (0)	0 (0)	-1.24843874238 (0.529779728776358)	-1.29960888906 (0.529779728776358)	-1.16732463094 (0.948056991160533)	0 (0)	-1.24364564414 (0.948056991160533)	0 (0)	-1.31482980972 (0.772724154490336)
LINE/Jockey.Antisense	-1.03934117309 (0.985526977911403)	-1.00859789833 (0.985526977911403)	1.00114980689 (0)	0 (0)	0 (0)	0 (0)	0 (0)	0 (0)	0.985334279943 (0)	0 (0)	0.974268768294 (0)	0 (0)	1.1841210347 (0)	0 (0)	0 (0)	0 (0)	0 (0)	0 (0)	0 (0)	0 (0)	0 (0)	0 (0)	0 (0)	0 (0)	0 (0)	0 (0)	0 (0)	0 (0)	-0.598684206401 (0.985526977911403)	0 (0)	0 (0)	0 (0)	1.18455935522 (0)	0 (0)	0 (0)	0 (0)	0 (0)	0 (0)	0 (0)	-1.01750506735 (0.985526977911403)	0 (0)	0 (0)	0 (0)	0 (0)	0 (0)	0 (0)	0 (0)	-1.47566591184 (0.772724154490336)	0 (0)
LINE/L1.Antisense	-0.460133703292 (0.983463376571664)	-1.13848038181 (0.624879391717899)	-1.34358697356 (0.445295950326807)	-0.340767987897 (0.953050220271161)	-1.66979720274 (0.415904429877176)	-1.30811135324 (0.116954788819844)	-1.61109873378 (0.195248220393825)	1.12505461214 (0.959192991684323)	-1.2270059539 (0.933310190630568)	1.17104229287 (0.466829811604907)	0.450761259456 (0.912840068130768)	-0.067699501811 (0.798894474137321)	0.0766255888933 (0.0511379077116066)	3.03547290544 (0.157466666699318)	-1.50162074902 (0.460041967425442)	2.00480922517 (0.504385260168894)	0 (0)	-0.822925925638 (0.398923677227341)	0 (0)	-0.204977538557 (0.596893184794056)	-0.687541809057 (0.531946307746936)	1.01818578022 (0.291612723146841)	-1.19113929353 (0.578327805232912)	-0.645556876695 (0.980814090134364)	-0.580010186393 (0.909229694515624)	1.15481684715 (0.740458051497348)	-2.35640910269 (0.0654900448696399)	2.30516603192 (0.746491287900729)	-0.354544750788 (0.725894980333137)	2.90426265982 (0.300847834222739)	-1.09853713619 (0.839903976012673)	0.203524213498 (0.985526977911403)	-3.23981596939 (0.00681255486658805)	1.29070433752 (0.948056991160533)	-0.141052324435 (0.921772482117977)	-3.15047337915 (0.00524700334331531)	-0.923867342036 (0.96556069577277)	0.0559508640398 (0.540424791643673)	-0.809136386936 (0.798403664562922)	0.862290175919 (0.549429444861192)	-1.63169839569 (0.653803287129888)	1.54610918179 (0.282271190435381)	-0.214274750129 (0.236422590921261)	-0.508957371855 (0.5207897755541)	-2.2604184726 (0.133500182067332)	1.80754863923 (0.664333790125856)	-1.7273464725 (0.520351434971155)	0.553580432383 (0.998192160575347)	-2.66880816175 (0.118907846075495)
LINE/L1-Tx1.Antisense	0 (0)	0 (0)	0 (0)	0 (0)	0 (0)	0 (0)	0 (0)	0 (0)	0 (0)	0 (0)	0 (0)	0 (0)	0 (0)	0 (0)	0 (0)	0 (0)	0 (0)	0 (0)	0 (0)	0 (0)	0 (0)	0 (0)	0 (0)	0 (0)	0 (0)	0 (0)	0 (0)	0 (0)	0 (0)	0 (0)	0 (0)	0 (0)	0 (0)	0 (0)	0 (0)	0 (0)	0 (0)	0 (0)	0 (0)	0 (0)	0 (0)	0 (0)	0 (0)	0 (0)	0 (0)	0 (0)	0 (0)	0 (0)	0 (0)
LINE/L2.Antisense	-1.31472523699 (0.915206525754554)	0.389569684765 (0.89762116855408)	-0.29433068545 (0.468485801171188)	0.83201439551 (0.238675473595018)	-0.443842321567 (0.833413409788496)	2.6314257638 (0.156723608566636)	-0.436691103129 (0.817803900179243)	-1.116452896 (0.537098049931069)	-0.94867505897 (0.410824484605321)	2.1055442373 (0.0886994978359502)	0.645998004304 (0.525951864382763)	1.80758128583 (0.626380446140677)	-0.279066064553 (0.559176308271138)	2.98389997374 (0.0314343373302477)	-0.457333184226 (0.0474239340189428)	1.78048457199 (0.0414192705655201)	0.190422277318 (0.985526977911403)	0 (0)	2.12033763751 (0.179644521212776)	0 (0)	-2.03566298274 (0.0220240649748067)	3.57076398876 (0.0261144627658089)	-1.09900694545 (0.199275185603025)	2.37038423603 (0.214377441114332)	-3.58232086217 (9.85054878499758e-05)	-0.217594189273 (0.90607296691169)	-2.32586139787 (0.0192252777291718)	2.45111180121 (0.180408599748923)	-1.10524403108 (0.0873554162289895)	2.37779534519 (0.00346928687850805)	-0.644659640581 (0.132582921033638)	1.07934359156 (0.444677793142505)	-2.49031301461 (0.00330021366046568)	2.45999475854 (0.141298318539982)	-0.616981677242 (0.985526977911403)	-1.96914848806 (0.0267261636948347)	-2.46196244609 (0.0119556333414263)	3.06851027293 (0.0484130689808241)	0.0160768058148 (0.859302618943334)	1.50212224599 (0.239536995746386)	-3.32134565627 (0.00578453384866163)	5.61925102107 (6.44419310188472e-06)	2.78650600556 (0.182181765563867)	1.10505217374 (0.427379160034725)	-0.851898794328 (0.412394950289092)	3.50069665944 (0.0433752474850222)	-0.966054593069 (0.948056991160533)	-0.273813120772 (0.468843285494395)	-1.05391366239 (0.549225387190575)
LINE/Penelope.Antisense	-0.598371529818 (0.65512177389999)	-0.564599389359 (0.720742921857703)	-0.49243955849 (0.720742921857703)	-0.110249540251 (0.772724154490336)	0 (0)	0 (0)	-0.568365901603 (0.772724154490336)	-0.00939591063996 (0.747245726383546)	0.307025235952 (0.195248220393825)	-0.153345148434 (0.983157396628456)	0 (0)	-0.0392000204839 (0.646646008020416)	0 (0)	0 (0)	-0.523453041014 (0.772724154490336)	-0.0749242300997 (0.772724154490336)	-0.228872482876 (0.985526977911403)	0 (0)	0 (0)	0 (0)	0 (0)	0 (0)	-0.521698740117 (0.772724154490336)	0 (0)	-0.117474916691 (0.469394286027703)	-0.365709935179 (0.931083169881962)	-0.0711835728387 (0.165809488454214)	0.0955632687359 (0.362046798662895)	0.0921484532223 (0.529779728776358)	0.226143249492 (0.38277121739917)	-0.148552816536 (0.942900144974664)	1.11805193476 (0.96556069577277)	1.74173458167 (0.620400969376515)	2.34485064159 (0.0526315789473684)	-0.0621851879269 (0.741312741312741)	-0.91578930002 (0.362046798662895)	-0.989003903794 (0.404951645954512)	-0.117307203695 (0.498114899440756)	-0.647247020589 (0.560454802734621)	0 (0)	-0.548827661146 (0.936653900381669)	-0.248476189945 (0.971836721090039)	-0.563968914472 (0.936653900381669)	-0.3711691008 (0.985526977911403)	-0.86755310896 (0.529779728776358)	0 (0)	-0.485221321001 (0.998670735114156)	-0.0429707517934 (0.65512177389999)	-0.944171122834 (0.114627556927827)
LINE/RTE-BovB.Antisense	-0.687782785467 (0.966889689960211)	-1.10320204504 (0.948056991160533)	-0.459040032923 (0.657715183557065)	2.74818149679 (0.0685195695320746)	-0.840563434011 (0.353104574429581)	0 (0)	-0.346382079 (0.992819294527051)	3.16096380065 (0.620400969376515)	-1.00013932426 (0.260196461940735)	1.90131331693 (0.214460456196419)	-0.218790215118 (0.708948812652512)	0.152933182392 (0.985526977911403)	-0.845723750247 (0.433291149825784)	2.24496319307 (0.579416446362998)	-0.425366607794 (0.546579629989098)	2.27541690206 (0.374548942579502)	0.250033248869 (0.695924377536069)	0 (0)	0 (0)	0 (0)	-1.19018925543 (0.0236894318528306)	1.52310594609 (0.96556069577277)	-1.05854308714 (0.292511427351359)	1.55588257098 (0.922043027621149)	0.205901343236 (0.660015394532444)	-1.17026797047 (0.221371743154582)	-1.73654486015 (0.0383648011106113)	1.70436249513 (0.399927615138115)	-1.02515719664 (0.139425725381992)	1.13857355071 (0.723961692077749)	-1.54964905809 (0.00849536258582132)	-1.93243076658 (0.0135760112802937)	-1.03422603851 (0.143881679290359)	1.50847149649 (0.746263722620661)	-0.256042334258 (0.951817948240432)	-0.43770033122 (0.988497885386074)	-1.28684292421 (0.115181398162961)	3.29939264336 (0.362471758005491)	5.79946436948 (0)	0.120435694403 (0.632032669546323)	-0.874517536537 (0.520624806407463)	3.14311508673 (0.0101649763142139)	0.376497310389 (0.824130019721908)	0.106100185998 (0.436400866449013)	0.221393163092 (0.979501199206522)	5.58873871613 (0.00366552397456212)	0.462057141691 (0.353314842846936)	1.51055883714 (0.727629073905251)	0.04960005172 (0.929079002907593)
LINE/RTE-X.Antisense	-0.506361533494 (0.810791966469047)	-0.110168641536 (0.931083169881962)	-0.355332352928 (0.69000174223654)	1.71305309643 (0.0843480644444901)	0 (0)	0 (0)	0 (0)	2.53641706808 (0.0120270865706726)	-0.578939557424 (0.71846917080085)	0.356125135528 (0.129359747344243)	-0.409745783407 (0.987170891752214)	-0.27800734637 (0.985526977911403)	0 (0)	4.34598795414 (0)	0.104551465953 (0.529716924288701)	1.24101206344 (0.96556069577277)	0 (0)	0 (0)	0 (0)	0 (0)	-0.258593411481 (0.918289342525419)	4.83875903404 (0)	-0.347021359862 (0.948056991160533)	5.84388984281 (0)	-0.687212978539 (0.38277121739917)	-0.37884512794 (0.998670735114156)	-0.617923295832 (0.529779728776358)	-0.454476914812 (0.720742921857703)	0.0455549095171 (0.458407944000844)	1.37645373239 (0.321083634172005)	-0.409707131265 (0.927113412603604)	1.55547902845 (0.96556069577277)	2.48043621647 (0.357101449275362)	5.04816486709 (0)	5.16277626375 (0)	4.78878827555 (0)	-0.566170065214 (0.236628315400852)	1.44102135369 (0.96556069577277)	-0.309515299023 (0.978192512500661)	-0.470366066775 (0.974880615639352)	-0.518355905483 (0.677444187837339)	4.61944317747 (0)	2.4131219868 (0.620400969376515)	2.48243298384 (0.620400969376515)	-0.553076727485 (0.609431471421469)	5.21780414103 (0)	-0.561829333461 (0.936653900381669)	-0.0386059733079 (0.586227911713961)	0 (0)
LTR.Antisense	0.465592981121 (0.404951645954512)	2.50452761195 (0)	2.48712634002 (0)	0 (0)	0 (0)	0 (0)	-0.428555231718 (0.948056991160533)	0 (0)	-0.895114046619 (0.458407944000844)	2.22591522271 (0)	0 (0)	0 (0)	0 (0)	2.01469458739 (0)	0 (0)	1.98480091866 (0)	0 (0)	0 (0)	0 (0)	0 (0)	-0.71539349394 (0.772724154490336)	0 (0)	-0.750013605725 (0.772724154490336)	-0.758081662509 (0.772724154490336)	-0.255053878823 (0.772724154490336)	0.297572011075 (0.96556069577277)	0 (0)	0.836673700027 (0.620400969376515)	-0.753998373687 (0.498114899440756)	2.55712764666 (0)	-0.955830676752 (0.404951645954512)	0 (0)	0.752886784885 (0.620400969376515)	2.2346396078 (0)	2.22389158622 (0)	0 (0)	0 (0)	0 (0)	0 (0)	0 (0)	0 (0)	2.00663797901 (0)	0 (0)	0 (0)	-0.503681676778 (0.985526977911403)	2.22733364597 (0)	-0.501746097559 (0.985526977911403)	2.33084407753 (0)	0 (0)
LTR/ERV1.Antisense	0.787557674529 (0.969803848376914)	1.12942352325 (0.368359310198343)	-0.0151484477468 (0.988499718164006)	-0.126536189219 (0.989847701451366)	-1.27232974365 (0.168933021042383)	-0.211327365574 (0.525701462158358)	-1.13457772645 (0.384891157579398)	-0.273282396182 (0.568717777382364)	-1.59019390215 (0.13238171182833)	0.358087622105 (0.985526977911403)	-0.100449958736 (0.535289381876859)	-0.501164890023 (0.675006034814973)	-0.261387590328 (0.527079699970117)	2.62056047282 (0.0232009942828671)	0.919306540214 (0.156321714051472)	0.115866717227 (0.999996769956)	0 (0)	0 (0)	-0.654871299577 (0.539688533296151)	0 (0)	-1.24381814796 (0.288511275706446)	1.92994036066 (0.666630648831777)	-1.58754731727 (0.072409846966027)	2.02767124074 (0.454998372459052)	-2.13005040854 (0.155427028689092)	0.927660536165 (0.439265241463345)	-1.67956108459 (0.17320451161116)	2.34372828889 (0.347681801737)	-0.106983851269 (0.804975805344876)	4.93026867235 (0.00879646489620156)	-0.818401796638 (0.957049034893742)	1.12108733734 (0.323562140342559)	-2.12421122713 (0.010247232170275)	0.594328164984 (0.951161628048436)	-1.70763395549 (0.00495848080926343)	-0.995602096932 (0.0658120425316617)	-0.719579077259 (0.731529950709597)	0.41589780876 (0.438967995808008)	-1.12237861672 (0.455606924216966)	-0.241042823207 (0.985526977911403)	0.0487737154197 (0.620400969376515)	5.54459509032 (0.0581725714673516)	1.97153975856 (0.985526977911403)	-0.482997922733 (0.101695461304466)	-0.479885683593 (0.968567896095571)	3.42296812223 (0.00104960363147678)	0.637220887854 (0.672120516754794)	1.58593012106 (0.36171933322427)	-2.11604960236 (0.197095818179673)
LTR/ERV1?.Antisense	0 (0)	0 (0)	0 (0)	0 (0)	0 (0)	0 (0)	0 (0)	0 (0)	0 (0)	0 (0)	0 (0)	0 (0)	0 (0)	0 (0)	0 (0)	0 (0)	0 (0)	0 (0)	0 (0)	0 (0)	0 (0)	0 (0)	0 (0)	0 (0)	0 (0)	0 (0)	0 (0)	0 (0)	0 (0)	0 (0)	0 (0)	0 (0)	0 (0)	0 (0)	0 (0)	0 (0)	0 (0)	0 (0)	0 (0)	0 (0)	0 (0)	0 (0)	0 (0)	0 (0)	0 (0)	0 (0)	0 (0)	0 (0)	0 (0)
LTR/ERVK.Antisense	0 (0)	-0.0439168703815 (0.458407944000844)	-1.00838507818 (0.507042253521127)	1.92502206092 (0.195248220393825)	0 (0)	0 (0)	-0.716081965635 (0.595673035778805)	-1.01065233636 (0.691064143072392)	-0.544246883827 (0.936653900381669)	0 (0)	-0.390150393873 (0.498114899440756)	2.93300011812 (0)	0 (0)	0 (0)	0 (0)	0.631326156852 (0.458407944000844)	0 (0)	0 (0)	0 (0)	0 (0)	0 (0)	0 (0)	0 (0)	0 (0)	-1.08482580835 (0.458407944000844)	0.70021012797 (0.475149159039679)	1.5637062965 (0.32683379758556)	0.184395171799 (0.458407944000844)	0 (0)	0.377495868191 (0.948056991160533)	-1.17657776288 (0.404951645954512)	0.00133197163783 (0.948056991160533)	0 (0)	0 (0)	0 (0)	0 (0)	1.15097159524 (0.620400969376515)	-0.939693694754 (0.929883137979317)	0 (0)	-0.314675066142 (0.929883137979317)	-0.600669265027 (0.985526977911403)	0 (0)	0 (0)	0.347351343861 (0.772724154490336)	0.970477892106 (0.620400969376515)	1.01148985784 (0.0635017782622145)	3.20679751663 (0)	-0.121632850273 (0.988499718164006)	-0.25370573274 (0.929883137979317)
LTR/ERVL.Antisense	-0.129728867485 (0.748392191682648)	-1.00326071794 (0.924567578783686)	-1.78660306118 (0.248894355216286)	0.702819915183 (0.820637357920873)	-0.351723471547 (0.96556069577277)	-0.379314390787 (0.724375327480727)	0.094388042412 (0.985526977911403)	1.36495513132 (0.918289342525419)	0.193772431526 (0.765520403502137)	-0.669167155577 (0.328750501114252)	0.223364118263 (0.969596994669038)	-1.16028902293 (0.253446277670127)	-0.965250176967 (0.5163247385647)	-0.57934437516 (0.985302023192328)	0.0268012846843 (0.985526977911403)	0.516596543141 (0.921510548504764)	-0.628103454043 (0.746070707779541)	0 (0)	0 (0)	0 (0)	0.299507039858 (0.585724806155052)	-0.342197253334 (0.810908894553451)	0.282917875341 (0.506760029799729)	0.643488180182 (0.940279679403055)	-0.47175672446 (0.598380222576982)	-0.887700108506 (0.631451671732156)	-0.688772534259 (0.988052569938819)	-1.30571605157 (0.496758045967924)	0.97988016627 (0.710674046832512)	-0.684599762396 (0.73093833683205)	-0.0123027889483 (0.983463376571664)	-1.18861386252 (0.531734634774952)	-0.420304987961 (0.457494577191598)	-0.282839967524 (0.49678309074596)	0.0730601678297 (0.988871163210016)	-0.196531623285 (0.948056991160533)	-1.65952161258 (0.319710898704977)	-0.637086516562 (0.695088474506598)	-0.557134888043 (0.603734748514273)	1.35780185211 (0.0860546231344083)	-1.37172813303 (0.344817688475757)	-0.490061309429 (0.990913199852862)	-1.18093851808 (0.419006733656366)	-0.0681600206833 (0.259499241412548)	1.01426726515 (0.289603876413039)	-0.106963418253 (0.978083993946972)	1.23800812535 (0.277429372978091)	0.88795608124 (0.431386862430255)	-0.455841403021 (0.248051364274577)
LTR/ERVL-MaLR.Antisense	-1.81648945838 (0.585076678236514)	-0.654357348282 (0.543228425324107)	-1.17004983933 (0.581057055078211)	0.393245234609 (0.948056991160533)	-2.24223227111 (0.0113166288870318)	0.654563367143 (0.985526977911403)	-0.527753143074 (0.620400969376515)	-0.908176305082 (0.529779728776358)	-1.39467599925 (0.368919320813419)	0.290018512561 (0.665353600207898)	-0.156579267632 (0.999842606488883)	-0.946613040474 (0.973844118910957)	-0.959743002586 (0.966481315267828)	-1.98861702299 (0.0920473187013389)	1.06811806749 (0.999731249251233)	-1.00620017272 (0.779780351545797)	-0.985316256419 (0.186266108299805)	0 (0)	-0.657649065193 (0.620400969376515)	0 (0)	-1.23448449003 (0.216999045947749)	0.968937369772 (0.596961753071332)	-1.58363571807 (0.213283873412256)	1.41137116094 (0.966889689960211)	-2.04210819412 (0.268760000317201)	2.90040511423 (0.273785825896675)	-1.39196465974 (0.117871970998013)	0.184474266757 (0.911851119065377)	-1.11928882056 (0.454227929988418)	0.0174205627138 (0.754669047174789)	0.101255422161 (0.810454041292319)	-0.427592684398 (0.809479797602202)	1.18960774865 (0.542578706298934)	0.779435662761 (0.962246471768303)	-0.979566642142 (0.999996769956)	-0.644687519374 (0.676973608067077)	-1.1302948757 (0.916508968590726)	2.14464218095 (0.0226537531238072)	0.241893579294 (0.777480965992011)	-1.34379714144 (0.72630803242457)	-0.635983027486 (0.125393281005628)	2.39714816332 (0.374879583036981)	1.36659467033 (0.616995986534144)	2.30223881623 (0.893732672331268)	-0.510969649037 (0.494646163754437)	2.11794892872 (0.209205081247017)	0.778382403539 (0.720029888779354)	3.04275336752 (0.0101787003746835)	-0.875217446415 (0.571091249445874)
LTR/ERVL?.Antisense	0.64809651706 (0.620400969376515)	0 (0)	0.34748083828 (0.620400969376515)	0 (0)	0.588277955279 (0.620400969376515)	-1.31796782746 (0.620400969376515)	0.64072707024 (0.620400969376515)	-1.30959650056 (0.620400969376515)	0 (0)	0 (0)	0 (0)	-1.100743985 (0.529779728776358)	0 (0)	0 (0)	0 (0)	-0.790817304713 (0.948056991160533)	-0.159804502265 (0.948056991160533)	0 (0)	0 (0)	0 (0)	-0.345018386678 (0.985526977911403)	0 (0)	-0.348861971988 (0.985526977911403)	-0.354978355478 (0.985526977911403)	-0.717628223486 (0.992819294527051)	-0.532455863513 (0.985526977911403)	-0.449875849754 (0.620400969376515)	0 (0)	-0.357431277416 (0.985526977911403)	0.220233335328 (0.620400969376515)	-0.387590892137 (0.985526977911403)	-1.25592042201 (0.620400969376515)	-0.0427635492951 (0.445295950326807)	0 (0)	0 (0)	0.128808096583 (0.529779728776358)	0.152986852397 (0.529779728776358)	-0.206941394693 (0.948056991160533)	0 (0)	-0.761553219316 (0.948056991160533)	-0.931132862263 (0.445295950326807)	0 (0)	0 (0)	0 (0)	0 (0)	0 (0)	0 (0)	-0.806346347421 (0.948056991160533)	0 (0)
LTR/Gypsy.Antisense	-0.951478751078 (0.125455412642125)	2.43578076412 (0.184891145557651)	0 (0)	-0.796110618496 (0.603541735503828)	0 (0)	0 (0)	-1.07547717033 (0.374879583036981)	0.523592736223 (0.942900144974664)	-0.617273700041 (0.393037699485172)	0 (0)	-0.0989027841458 (0.747489345385943)	-0.181014344701 (0.483833426325523)	-0.830551407793 (0.964539934575833)	0 (0)	-0.691465910343 (0.964539934575833)	-0.665755352412 (0.723120001700164)	0 (0)	0 (0)	0 (0)	0 (0)	-1.32045563693 (0.32683379758556)	0 (0)	-1.39156910959 (0.32683379758556)	0 (0)	-0.0276961722289 (0.985526977911403)	0 (0)	-1.67004049727 (0.404951645954512)	-0.329272064811 (0.985526977911403)	0 (0)	-0.722865501674 (0.708044705379905)	0.907840030055 (0.262051402152058)	-0.247875473877 (0.999416893765093)	-1.60429849412 (0.362046798662895)	0 (0)	0 (0)	-1.5225252045 (0.362046798662895)	-1.19405563902 (0.445295950326807)	0.910556565974 (0.445295950326807)	-1.51837674334 (0.159200979930274)	1.31176898348 (0.110091879350348)	-0.991350619882 (0.620400969376515)	0 (0)	0 (0)	-0.457987395449 (0.985526977911403)	0 (0)	-0.0640401985414 (0.96556069577277)	1.43400747968 (0.388936297953652)	0.217802236124 (0.803339254021425)	0 (0)
LTR/Gypsy?.Antisense	0 (0)	0.00752909900203 (0.529779728776358)	-0.939453642282 (0.529779728776358)	-0.606241459391 (0.948056991160533)	0 (0)	0 (0)	0 (0)	0 (0)	0 (0)	0 (0)	0 (0)	0 (0)	0 (0)	0 (0)	0.0134040419885 (0.529779728776358)	-0.61552595408 (0.948056991160533)	0 (0)	0 (0)	0 (0)	0 (0)	0 (0)	0 (0)	0 (0)	0 (0)	-1.18949571396 (0.458407944000844)	0 (0)	0 (0)	0 (0)	0 (0)	0 (0)	0.00154818600551 (0.529779728776358)	0 (0)	0 (0)	0 (0)	0 (0)	0 (0)	0 (0)	0 (0)	0 (0)	0 (0)	-0.786278019066 (0.966889689960211)	0 (0)	0 (0)	-0.799517565726 (0.966889689960211)	0 (0)	0 (0)	0 (0)	-1.25901305737 (0.404951645954512)	0 (0)
LTR?.Antisense	-0.427430594017 (0.918289342525419)	-0.359708182433 (0.667100977199253)	-0.419231885694 (0.918289342525419)	2.8014655542 (0)	0 (0)	1.11809422063 (0.475149159039679)	0 (0)	1.06103661752 (0.458407944000844)	0 (0)	1.19554500109 (0.620400969376515)	0 (0)	-0.481921607376 (0.963940541668787)	0 (0)	-0.406045633885 (0.966889689960211)	0 (0)	1.53237728637 (0.248942388975482)	0 (0)	0 (0)	0 (0)	0 (0)	0 (0)	3.10708703673 (0)	-0.630202537884 (0.985526977911403)	1.72719251121 (0.248942388975482)	-0.0349040722256 (0.966889689960211)	0 (0)	1.04391024167 (0.220833877924233)	0.771971417102 (0.910854725837749)	-0.838448025162 (0.380512955493284)	-0.495009762493 (0.910854725837749)	0 (0)	-0.376298485489 (0.579591169276132)	-0.199775309706 (0.32683379758556)	0.337348779233 (0.997649469311885)	-0.284230910648 (0.567966864758368)	-0.55154011115 (0.529779728776358)	-0.493871439656 (0.765675447308762)	0 (0)	-0.36808699342 (0.981163366836644)	0 (0)	-0.661537483704 (0.640574706964124)	-0.157389340299 (0.560454802734621)	-0.355534181242 (0.966889689960211)	0.712004859217 (0.96556069577277)	-0.327576689179 (0.940279679403055)	0 (0)	0.743678095428 (0.417298319396672)	-0.306422989523 (0.732272586910695)	0 (0)
Low_complexity.Antisense	0.094832852049 (0.587069196841002)	0.062821807398 (0.987170891752214)	-2.10200009364 (0.167126717731913)	0.646468993269 (0.567966864758368)	-1.23365476652 (0.959192991684323)	-0.734800917547 (0.996903250208337)	0.525515203508 (0.665660368332117)	1.05330998861 (0.923105856457059)	-0.296575765256 (0.607883439018253)	-0.539680936869 (0.529779728776358)	2.40174342885 (0.00286484540645825)	-0.989418337656 (0.239331458178601)	-1.81174880504 (0.0276660967259647)	2.64277749007 (0.0801702491583572)	-0.425071126057 (0.662659090953475)	3.82061777186 (7.24376769195355e-05)	-0.240870931957 (0.324470926047773)	0 (0)	0 (0)	0 (0)	-1.53341751408 (0.0280748374019994)	8.54114894714 (6.94187760613691e-05)	-1.54902524279 (0.30695403873262)	0.615586626591 (0.708377547761813)	-4.86420105785 (6.79580553295417e-06)	0.789687653908 (0.883252235743335)	-2.63551166988 (0.000344786471800623)	3.36979367171 (0.00459347022571091)	-2.41354333531 (0.0349069847492147)	1.94722981588 (0.231848912290286)	-1.67282199625 (0.272832906243428)	0.11229657679 (0.96556069577277)	-3.20179566773 (5.81731384036692e-05)	0.429809776728 (0.964539934575833)	-0.441369585343 (0.620400969376515)	-1.72351475713 (0.00982018469255809)	-3.78927438554 (1.10346829132644e-06)	4.26750337803 (3.65138324791318e-05)	-0.722973962498 (0.780808185506754)	1.59592094534 (0.160833138692339)	-3.36319635354 (1.96417551417749e-05)	4.33041847057 (0.000551309082282271)	0.623039195157 (0.576963924428218)	-0.380472075033 (0.387901776263069)	-1.34721511326 (0.131008421780151)	3.04792687776 (0.0560469853118478)	-1.68264862248 (0.129547626175003)	3.35278866936 (0.00259968801020789)	0.395243715016 (0.296337352320917)
RC/Helitron.Antisense	0 (0)	0 (0)	0 (0)	0 (0)	0 (0)	0 (0)	0 (0)	0 (0)	0 (0)	0 (0)	0 (0)	0 (0)	0 (0)	0 (0)	0 (0)	0 (0)	0 (0)	0 (0)	0 (0)	0 (0)	0 (0)	0 (0)	0 (0)	0 (0)	0 (0)	0 (0)	0 (0)	0 (0)	0 (0)	0 (0)	0 (0)	0 (0)	0 (0)	0 (0)	0 (0)	0 (0)	0 (0)	0 (0)	0 (0)	0 (0)	0 (0)	0 (0)	0 (0)	0 (0)	0 (0)	0 (0)	0 (0)	0 (0)	0 (0)
RC?/Helitron?.Antisense	0 (0)	0 (0)	0 (0)	-1.01650673123 (0.985526977911403)	0 (0)	0 (0)	0 (0)	0 (0)	0 (0)	0 (0)	0 (0)	0 (0)	0 (0)	0 (0)	0 (0)	0 (0)	0 (0)	0 (0)	0 (0)	0 (0)	0 (0)	0 (0)	0 (0)	0 (0)	0 (0)	0 (0)	0 (0)	0 (0)	0 (0)	0 (0)	-1.02666181513 (0.985526977911403)	0 (0)	0 (0)	0 (0)	0 (0)	0 (0)	0 (0)	0 (0)	0 (0)	0 (0)	0 (0)	0 (0)	0 (0)	0 (0)	0 (0)	0 (0)	0 (0)	0 (0)	0 (0)
RNA.Antisense	-0.999526403004 (0)	0 (0)	0 (0)	-0.999459897341 (0)	0 (0)	0 (0)	-0.999475203323 (0)	0 (0)	0 (0)	0 (0)	0 (0)	0 (0)	0 (0)	0 (0)	0 (0)	0 (0)	0 (0)	0 (0)	0 (0)	0 (0)	0 (0)	0 (0)	0 (0)	-0.999529079324 (0)	0 (0)	0 (0)	0 (0)	0 (0)	0 (0)	0 (0)	0 (0)	0 (0)	0 (0)	0 (0)	0 (0)	0.999116217238 (0)	0 (0)	0 (0)	0 (0)	0 (0)	0 (0)	0 (0)	0 (0)	0 (0)	0 (0)	0 (0)	0 (0)	0 (0)	0 (0)
Retroposon/SVA.Antisense	-0.105907089868 (0.691064143072392)	0.245041334541 (0.985526977911403)	0 (0)	0 (0)	0 (0)	0 (0)	-0.134316273502 (0.985526977911403)	0 (0)	0 (0)	0 (0)	1.32581820521 (0.458407944000844)	-1.29511287527 (0.458407944000844)	0 (0)	0 (0)	-0.290172610567 (0.966889689960211)	0 (0)	0 (0)	0 (0)	0 (0)	0 (0)	0 (0)	0 (0)	0 (0)	0 (0)	-0.153258087132 (0.620400969376515)	-1.19625517114 (0.620400969376515)	-0.555360859037 (0.785821814698235)	-1.19524590913 (0.620400969376515)	1.43148134331 (0.0917114476470364)	0 (0)	-0.306412247913 (0.772724154490336)	0 (0)	-0.2822706527 (0.772724154490336)	0 (0)	-0.315783687782 (0.772724154490336)	0 (0)	0.317398217126 (0.620400969376515)	-1.05949846806 (0.691064143072392)	0 (0)	-0.78663917725 (0.966889689960211)	0.161278003846 (0.772724154490336)	0 (0)	0 (0)	0 (0)	0 (0)	0 (0)	-0.16550961245 (0.948056991160533)	-1.27558285989 (0.691064143072392)	1.46420009901 (0.404951645954512)
SINE/5S-Deu-L2.Antisense	3.3137426017 (0)	0 (0)	0.176402794362 (0.558353696710771)	3.20479474245 (0)	0 (0)	0 (0)	-0.735700362683 (0.732272586910695)	0 (0)	-0.819411910526 (0.667100977199253)	0 (0)	-0.823781663175 (0.667100977199253)	0 (0)	-0.73349671001 (0.560454802734621)	0 (0)	-0.652612663812 (0.691064143072392)	0 (0)	0 (0)	0 (0)	0 (0)	0 (0)	-0.425702002997 (0.963940541668787)	0 (0)	-0.459490622628 (0.963940541668787)	0 (0)	-0.0238968896769 (0.380599143406742)	0 (0)	-0.0614474861781 (0.997957833491521)	0 (0)	0.171826399658 (0.498114899440756)	0 (0)	0 (0)	1.12485178224 (0.281825460368295)	-0.460722566439 (0.985526977911403)	0 (0)	0 (0)	-1.02104844032 (0.38277121739917)	-0.763707222374 (0.940279679403055)	1.45500842638 (0.236157410319071)	-0.304886020565 (0.981163366836644)	0.113078233354 (0.593692717635786)	-0.294823166144 (0.998670735114156)	0 (0)	0 (0)	-0.623779011657 (0.963940541668787)	0.401383265271 (0.747245726383546)	0 (0)	0.0627221544445 (0.985526977911403)	0 (0)	-0.774960938693 (0.458407944000844)
SINE/Alu.Antisense	-1.14569043189 (0.737651728525007)	0.900371584571 (0.256431750593046)	-2.2626817325 (0.362046798662895)	1.85397952163 (0.0822864933733103)	-2.14631377035 (0.167619129086031)	-1.21034623947 (0.62196719096901)	-0.62742024016 (0.985526977911403)	1.07600172788 (0.957049034893742)	-4.08510909026 (0.000135552341969814)	2.26355270463 (0.208514243244944)	-0.0463591306564 (0.974784887067733)	-0.900580481957 (0.641360713246331)	-2.34952251178 (0.093697741540726)	6.58503583917 (1.92567287342635e-05)	-1.13726801633 (0.163722679248312)	4.27572992893 (0.02845519626282)	-0.106795175104 (0.948056991160533)	3.51486013354 (0.1224251408507)	0 (0)	-0.219541295566 (0.927878935431734)	-4.60089247093 (0.000419578151659909)	8.58800834232 (7.03260131669937e-08)	-4.70456521194 (1.42003208435197e-06)	2.69266217873 (0.255512246682926)	-4.75866582688 (9.35130025224468e-05)	5.43959194658 (0.000344831219027406)	-3.58009645948 (0.00309873262286926)	4.77487796643 (0.000600892399416925)	-2.13301591026 (0.0168250308715523)	4.81874187204 (0.000911957613056914)	-0.906452362098 (0.181097465425141)	-1.61580859304 (0.698891913962277)	-3.80652758379 (2.27057737135092e-05)	7.41246491473 (7.12120049844919e-07)	2.99851508884 (0.425044584228913)	-1.12829213471 (0.0285817524341113)	-2.97728461403 (0.00135168908606851)	6.09968483129 (5.19569264551856e-05)	-1.21208449913 (0.101857827872816)	0.736637946466 (0.253282964562478)	-6.01008382618 (5.19305268602504e-11)	9.00929744837 (1.43169686207292e-07)	1.45733992811 (0.66890351095145)	-0.784374442381 (0.0321801506522453)	-2.76298879868 (0.000290507319447221)	5.66831391742 (0.000125038090730905)	-1.26832583721 (0.0775037011967849)	3.204987793 (0.283902100456713)	-3.64731573227 (0.0292112133254025)
SINE/MIR.Antisense	-1.0198950612 (0.980814090134364)	2.36515029709 (0.182145763272935)	-3.7955509386 (0.00102523788069306)	2.21908981717 (0.0912763816366417)	-1.0786058917 (0.772724154490336)	-0.221939619308 (0.985526977911403)	-0.167619967697 (0.578446341354621)	-0.985999534471 (0.592604534005038)	-1.2317377753 (0.524915192952646)	-0.476767542406 (0.937709177764435)	-1.15826405379 (0.853695665806751)	-0.520483724712 (0.779537478893902)	-0.863360478291 (0.26386200778387)	4.49193417857 (0.0159955045062093)	-1.58040636273 (0.148233608593566)	1.57701565743 (0.233207962491442)	-0.0526388101254 (0.96556069577277)	0.933845812031 (0.569633765565675)	1.61404283812 (0.667262216726828)	0 (0)	-0.884074541995 (0.424960651680032)	5.40282341685 (0.000264426907734307)	-0.00896666389005 (0.209011231450056)	1.54302462964 (0.640756414417546)	-2.57059689262 (0.0805262345208804)	4.0129258818 (0.00320588278223129)	-3.06574777751 (0.0467632208199233)	4.31236187745 (0.00312838822493008)	0.285248078859 (0.326069784072879)	1.78471626088 (0.105081244020237)	-1.96256603261 (0.306303276626959)	0.567968963825 (0.588284122127692)	-2.32666043886 (0.0101069717523062)	4.30471099435 (0.0279201191534504)	0.492848706482 (0.969803848376914)	-2.42590691301 (0.0105682237133418)	-3.63593231642 (0.00221375869374594)	2.83169285473 (0.137647132331711)	-1.90666447706 (0.0675840117984579)	1.19270509764 (0.807744051282493)	-3.21644454228 (0.0071180562320531)	9.0872363147 (3.88757978764075e-08)	2.91599352175 (0.0970765148531022)	3.27368439079 (0.208191378873119)	-3.19338102225 (0.0419226352164659)	3.10127504643 (0.0418120417481214)	-2.26122516241 (0.412489920227065)	1.25356618791 (0.577900380994108)	-2.45036451617 (0.0275877273547373)
SINE/tRNA.Antisense	-0.204994078302 (0.940620878936007)	-2.30211721663 (0.13985886637828)	-1.28218942125 (0.475744318402451)	-0.421766864234 (0.988364283517713)	-0.821823546256 (0.410587275768241)	-1.20247499412 (0.285435540069401)	0.0948831830669 (0.999665407481976)	-0.323898658066 (0.624652864075605)	1.43244049353 (0.174026176979784)	0 (0)	1.5415061289 (0.174026176979784)	0.333753424742 (0.935772463643247)	-1.25828611028 (0.375887103352075)	0 (0)	0.293459111523 (0.643452872104362)	0 (0)	0 (0)	0 (0)	0 (0)	0 (0)	-0.021692907313 (0.918289342525419)	3.20369657485 (0)	-0.333935376624 (0.948056991160533)	1.33048673862 (0.620400969376515)	-0.694298979281 (0.790399011107222)	-0.376088823476 (0.925212352504117)	-1.66969098835 (0.0994612954662315)	0.468578833828 (0.976657566853851)	0 (0)	-0.742964004058 (0.430251154005362)	-1.23255290606 (0.72630803242457)	0.821090765646 (0.745574702671407)	0.48497561305 (0.96556069577277)	0.375931021439 (0.910854725837749)	0.466313888924 (0.96556069577277)	0.589679647681 (0.498114899440756)	0.186229901684 (0.35743748857685)	0 (0)	-0.860550354232 (0.755432134463718)	0 (0)	-0.666503244013 (0.985526977911403)	0 (0)	0.268928257805 (0.569685440819666)	-0.482135690087 (0.785821814698235)	-0.103175460021 (0.985526977911403)	0 (0)	0.161323918908 (0.525701462158358)	0 (0)	0.349468592593 (0.985526977911403)
SINE/tRNA-Deu.Antisense	0 (0)	0 (0)	-0.861906065877 (0.772724154490336)	-0.115687605751 (0.772724154490336)	0 (0)	0 (0)	0 (0)	1.06492442114 (0)	1.74279994219 (0)	0 (0)	1.71742550388 (0)	1.73495549915 (0)	-0.734374256767 (0.985526977911403)	0 (0)	-0.65690794667 (0.985526977911403)	0 (0)	0 (0)	0 (0)	0 (0)	0 (0)	0 (0)	0 (0)	0 (0)	0 (0)	-0.761771409255 (0.985526977911403)	0 (0)	0 (0)	0 (0)	-1.32855752223 (0.620400969376515)	0.96716084847 (0.620400969376515)	0 (0)	1.01729710364 (0.620400969376515)	-1.41064137245 (0.772724154490336)	0 (0)	-1.50228162346 (0.772724154490336)	-1.36596240058 (0.772724154490336)	0 (0)	0 (0)	0 (0)	0 (0)	0 (0)	0 (0)	0 (0)	0 (0)	0 (0)	0 (0)	0 (0)	0 (0)	0 (0)
SINE/tRNA-RTE.Antisense	-0.147222435228 (0.985526977911403)	1.07667622025 (0.32683379758556)	-1.3606900455 (0.620400969376515)	-0.781084644708 (0.963940541668787)	0 (0)	1.64894894396 (0.263300607760241)	-0.142648943499 (0.947566873372897)	-0.253097094095 (0.969868923024401)	0.469881254175 (0.417298319396672)	0 (0)	0.714875234668 (0.593692717635786)	0.808926463093 (0.168704787147562)	0 (0)	0 (0)	0.116113334335 (0.94863962881047)	-0.592658967869 (0.983463376571664)	0 (0)	0 (0)	0 (0)	0 (0)	0 (0)	1.83551723024 (0.338755597139272)	-0.062352496312 (0.97521798547822)	-0.303719357582 (0.620400969376515)	1.507625211 (0.0775816127078007)	0.350331514576 (0.948056991160533)	-0.010746283799 (0.755436927930892)	0.0185663945576 (0.998670735114156)	-0.186404917867 (0.985526977911403)	-0.194102920532 (0.985526977911403)	-0.207817454618 (0.963940541668787)	0.389381423945 (0.929883137979317)	-0.12149790426 (0.948056991160533)	0 (0)	-0.270854568078 (0.973866033112444)	-0.101734829248 (0.935772463643247)	-0.453887765584 (0.558331832125516)	1.1703772311 (0.412212911835171)	-1.12291115579 (0.711565947299505)	0 (0)	0.281403529217 (0.380649006939303)	1.77822870774 (0.404951645954512)	0.878328424752 (0.560454802734621)	0.005546055602 (0.480220416004472)	0.427416674931 (0.910854725837749)	0 (0)	0.485110590979 (0.910854725837749)	0.471799251836 (0.708948812652512)	-0.673270835305 (0.93151178060951)
SINE?/tRNA.Antisense	0 (0)	0 (0)	0 (0)	0 (0)	0 (0)	0 (0)	0 (0)	0 (0)	0 (0)	0 (0)	0 (0)	0 (0)	0 (0)	0 (0)	0 (0)	0 (0)	0 (0)	0 (0)	0 (0)	0 (0)	0 (0)	0 (0)	0 (0)	0 (0)	0 (0)	0 (0)	0 (0)	0 (0)	0 (0)	0 (0)	0 (0)	0 (0)	0 (0)	0 (0)	0 (0)	0 (0)	0 (0)	0 (0)	0 (0)	0 (0)	0 (0)	0 (0)	0 (0)	0 (0)	0 (0)	0 (0)	0 (0)	0 (0)	0 (0)
Satellite.Antisense	-0.0212064506572 (0.999996769956)	1.22148078602 (0.362046798662895)	0 (0)	-1.10333241325 (0.362046798662895)	-0.86434994113 (0.772724154490336)	0 (0)	0.107221359272 (0.96556069577277)	0 (0)	-0.831549037795 (0.620400969376515)	-0.845096821869 (0.362046798662895)	-0.476495572017 (0.985526977911403)	-0.763554576577 (0.929883137979317)	-0.348966878944 (0.691064143072392)	-0.742085250677 (0.404951645954512)	-0.346747007745 (0.691064143072392)	-0.789006162782 (0.404951645954512)	0 (0)	0 (0)	0 (0)	0 (0)	0 (0)	0.762327944844 (0.620400969376515)	-0.775807721654 (0.404951645954512)	-0.812764098979 (0.404951645954512)	1.4985206669 (0.32683379758556)	-0.0806600458926 (0.772724154490336)	0 (0)	0.0217734309554 (0.96556069577277)	0 (0)	0.89958365785 (0.620400969376515)	-0.520309412111 (0.985526977911403)	0.44196737152 (0.96556069577277)	-0.0945481409567 (0.985526977911403)	-0.78035783414 (0.404951645954512)	0 (0)	-0.338389446523 (0.691064143072392)	0 (0)	-1.00314641708 (0.157398673905049)	0 (0)	-0.0744086660957 (0.772724154490336)	0 (0)	0.0726942907981 (0.985526977911403)	-0.214777567349 (0.998670735114156)	-0.21412070753 (0.998670735114156)	0 (0)	0.468517375577 (0.607747354107421)	2.02525906345 (0)	0.686868312093 (0.32683379758556)	-0.658641398319 (0.966889689960211)
Satellite/acro.Antisense	0 (0)	0 (0)	0 (0)	0 (0)	0 (0)	0 (0)	0 (0)	0 (0)	0 (0)	0 (0)	0 (0)	0 (0)	0 (0)	0 (0)	0 (0)	0 (0)	0 (0)	0 (0)	0 (0)	0 (0)	0 (0)	0 (0)	0 (0)	0 (0)	0 (0)	0 (0)	0 (0)	0 (0)	0 (0)	0 (0)	0 (0)	0 (0)	0 (0)	0 (0)	0 (0)	0 (0)	0 (0)	0 (0)	0 (0)	0 (0)	0 (0)	0 (0)	0 (0)	0 (0)	0 (0)	0 (0)	0 (0)	0 (0)	0 (0)
Satellite/centr.Antisense	0 (0)	0 (0)	0 (0)	0 (0)	0 (0)	0 (0)	0 (0)	0 (0)	0 (0)	0 (0)	0 (0)	0 (0)	0 (0)	0 (0)	0 (0)	0 (0)	0 (0)	0 (0)	0 (0)	0 (0)	0 (0)	0 (0)	0 (0)	0 (0)	0 (0)	0 (0)	0 (0)	0 (0)	0 (0)	0 (0)	0 (0)	0 (0)	0 (0)	0 (0)	0 (0)	0 (0)	0 (0)	0 (0)	0 (0)	0 (0)	0 (0)	0 (0)	0 (0)	0 (0)	0 (0)	0 (0)	0 (0)	0 (0)	0 (0)
Satellite/telo.Antisense	0 (0)	0 (0)	0 (0)	0 (0)	0 (0)	0 (0)	0 (0)	0 (0)	0 (0)	0 (0)	0 (0)	0 (0)	0 (0)	0 (0)	0 (0)	0 (0)	0 (0)	0 (0)	0 (0)	0 (0)	0 (0)	0 (0)	0 (0)	0 (0)	0 (0)	0 (0)	0 (0)	0 (0)	0 (0)	0 (0)	0 (0)	0 (0)	0 (0)	0 (0)	0 (0)	0 (0)	0 (0)	0 (0)	0 (0)	0 (0)	0 (0)	0 (0)	0 (0)	0 (0)	0 (0)	0 (0)	0 (0)	0 (0)	0 (0)
Simple_repeat.Antisense	-0.537147669435 (0.588011255016105)	0.156977181776 (0.749418454396551)	-0.690496453456 (0.342640284160711)	-0.389781146438 (0.848243040375664)	-1.23042898521 (0.121999442674099)	-1.31279021457 (0.359753494773365)	0.940167616323 (0.695465332467902)	-1.34991067748 (0.709783783899436)	-0.0216497711299 (0.843622931625131)	1.30571126025 (0.193592043416688)	3.58789746321 (0.00660021299185189)	-1.91898097843 (0.366546304120504)	-2.2114555332 (0.0345453048576232)	7.53866770063 (0.00100609707508109)	0.510497392383 (0.857547353501099)	3.66021837957 (0.0150694247324702)	0.345492795092 (0.497386628754256)	-0.842843255973 (0.647914869140452)	-0.363799719577 (0.975929157149176)	-0.722473640511 (0.430886529547662)	-1.6436773594 (0.107511823154337)	7.51356356644 (1.2677081225193e-05)	-1.76177854348 (0.0912205673538005)	1.70344177657 (0.225692503169029)	-3.75455842765 (0.0162875768079753)	5.58021587712 (0.000109548491012713)	-3.50231062996 (0.00183096261411277)	5.95580987183 (0.000784901788757827)	-2.10216498108 (0.206622445425733)	3.86321913497 (0.0864594542178004)	-0.939163256387 (0.577921817387676)	3.21818471363 (0.0385541459296431)	-3.59642801098 (0.000118695423327183)	5.50161588289 (0.00295781826983326)	1.06158519744 (0.529779728776358)	-2.14085529271 (0.144802633634612)	-3.80920354741 (1.54221586197969e-05)	6.111925256 (4.35132240106093e-05)	-2.86411591969 (0.0127313420404873)	2.94210337556 (0.000678781266082461)	-4.09485460186 (8.49727895260569e-05)	9.90364874957 (6.17956777147702e-07)	2.27109838394 (0.882538090920393)	-0.33857936463 (0.478781540915482)	-2.36714130298 (0.118522200020078)	5.4697598958 (0.0119271204073055)	-1.56922182187 (0.0759669309261531)	-0.137285470015 (0.576709418118871)	0.383773103852 (0.976657566853851)
Unknown.Antisense	0.252607073587 (0.691064143072392)	2.61075147538 (0.0376573059234668)	1.47431112885 (0.0376573059234668)	-0.717226395481 (0.214832112824015)	1.39855455117 (0.458407944000844)	0 (0)	-0.111964916102 (0.620400969376515)	0.547178139826 (0.273918858671148)	0.483933856906 (0.572225084745763)	-0.354697979512 (0.918289342525419)	-0.797892491903 (0.529779728776358)	-0.569487898177 (0.805448106782893)	0.466336059121 (0.985526977911403)	0 (0)	-0.657345728573 (0.32683379758556)	-0.716105473905 (0.609431471421469)	0 (0)	0 (0)	0 (0)	0 (0)	-0.145431445243 (0.708568877953422)	0 (0)	-0.0013878227215 (0.947566873372897)	0.0130994026317 (0.947566873372897)	-0.765515218649 (0.732885651317032)	-0.7616975045 (0.93151178060951)	-0.783078071258 (0.372481405721134)	0 (0)	-0.618613496949 (0.579591169276132)	0 (0)	-0.608494382449 (0.278777099365032)	-0.813852893424 (0.458407944000844)	-0.671253145112 (0.23286876774456)	-0.582800103514 (0.772724154490336)	-0.34358528879 (0.96556069577277)	-0.737482536721 (0.32683379758556)	-0.95056823495 (0.120307176348745)	4.74736543785 (0)	0 (0)	-0.153997951275 (0.985526977911403)	-0.791995550457 (0.0708226062274863)	3.08312881804 (0.145702902675029)	-0.782711206012 (0.158742499156659)	-0.891523731247 (0.105569675649274)	-0.615331330331 (0.969803848376914)	4.26101551282 (0)	0 (0)	4.11776142704 (0.00873178294573643)	-0.0634252989429 (0.703296703296301)
rRNA.Antisense	0 (0)	0 (0)	-0.438655865209 (0.691064143072392)	-0.227160056537 (0.691064143072392)	0 (0)	2.5963274799 (0)	-0.544196859505 (0.985526977911403)	0 (0)	0 (0)	-0.744614007827 (0.620400969376515)	-0.365000740955 (0.929883137979317)	0 (0)	0 (0)	0 (0)	0 (0)	0 (0)	0 (0)	0 (0)	0 (0)	0 (0)	0 (0)	0 (0)	0 (0)	-1.02072612134 (0.362046798662895)	0.0141956551166 (0.978192512500661)	2.96993930766 (0)	-0.77672619284 (0.32683379758556)	0.736640795331 (0.32683379758556)	0 (0)	0 (0)	-0.355209527911 (0.929883137979317)	1.39950264759 (0.195248220393825)	0 (0)	-0.100520853342 (0.620400969376515)	0 (0)	0 (0)	0 (0)	0 (0)	0 (0)	-0.398115419222 (0.966889689960211)	1.06536106339 (0.620400969376515)	0 (0)	0 (0)	0 (0)	0 (0)	0 (0)	0 (0)	-0.337983218586 (0.966889689960211)	-0.138058542578 (0.401046501814499)
scRNA.Antisense	-0.631109014064 (0.772724154490336)	0 (0)	0 (0)	-0.611397868335 (0.772724154490336)	0 (0)	0 (0)	1.03343286427 (0)	-1.00290606434 (0.985526977911403)	0 (0)	-0.614226144383 (0.772724154490336)	0 (0)	-0.631238465775 (0.772724154490336)	0 (0)	0 (0)	0.00246236549393 (0.620400969376515)	-0.00607248756177 (0.620400969376515)	0 (0)	0 (0)	0 (0)	0 (0)	0 (0)	0 (0)	0 (0)	0 (0)	0 (0)	0 (0)	0 (0)	0 (0)	1.32068684568 (0)	0 (0)	1.33411113713 (0)	0.202683930214 (0.620400969376515)	0 (0)	0 (0)	-0.992146816078 (0.985526977911403)	1.06281573719 (0)	-0.729820985088 (0.992819294527051)	0 (0)	0 (0)	0 (0)	0 (0)	0 (0)	0 (0)	0 (0)	0 (0)	0 (0)	0 (0)	0 (0)	-0.420413832233 (0.948056991160533)
snRNA.Antisense	-1.31203053363 (0.620400969376515)	0 (0)	0 (0)	0 (0)	0 (0)	0 (0)	0 (0)	0 (0)	0 (0)	-0.877058892886 (0.948056991160533)	0 (0)	0 (0)	0 (0)	0 (0)	0 (0)	0 (0)	0 (0)	0 (0)	0 (0)	0 (0)	0 (0)	0 (0)	0 (0)	0 (0)	-0.378748828965 (0.969803848376914)	0 (0)	0 (0)	-0.358373916875 (0.969803848376914)	0 (0)	0 (0)	0 (0)	0 (0)	-0.652009815862 (0.772724154490336)	-0.631936770294 (0.772724154490336)	0 (0)	0 (0)	0 (0)	-0.689788472438 (0.948056991160533)	-1.0159887859 (0.529779728776358)	0 (0)	-0.958250725309 (0.529779728776358)	0 (0)	-0.314723257183 (0.948056991160533)	0 (0)	-0.643817442197 (0.772724154490336)	0 (0)	-0.629751069397 (0.772724154490336)	0 (0)	1.60653224088 (0)
srpRNA.Antisense	0 (0)	0 (0)	0 (0)	0 (0)	0 (0)	0 (0)	0 (0)	0 (0)	0 (0)	0 (0)	0 (0)	0 (0)	0 (0)	0 (0)	0 (0)	1.02516360032 (0)	0 (0)	0 (0)	0 (0)	0 (0)	1.00705189796 (0)	0 (0)	1.03192238022 (0)	0 (0)	0 (0)	0 (0)	0 (0)	-1.02582283362 (0.985526977911403)	-0.0243931573956 (0.620400969376515)	0 (0)	0 (0)	0 (0)	0.981836867219 (0)	0 (0)	0 (0)	0 (0)	0 (0)	0 (0)	0 (0)	1.03580657658 (0)	0 (0)	0 (0)	0 (0)	0 (0)	0 (0)	0 (0)	0 (0)	1.02327941739 (0)	0 (0)
tRNA.Antisense	0 (0)	0 (0)	-0.40028573644 (0.998670735114156)	0 (0)	0 (0)	0 (0)	0 (0)	0.0164875095119 (0.445295950326807)	0 (0)	-0.87353526994 (0.948056991160533)	0 (0)	-0.834276377081 (0.948056991160533)	0 (0)	0 (0)	0 (0)	0 (0)	0 (0)	0 (0)	0 (0)	0 (0)	0 (0)	0 (0)	0 (0)	0 (0)	0 (0)	0 (0)	0 (0)	0 (0)	0 (0)	1.96304350495 (0)	-1.10545880975 (0.529779728776358)	0.0249115559613 (0.445295950326807)	0 (0)	0 (0)	0 (0)	1.77058774214 (0)	-0.878648481702 (0.948056991160533)	0 (0)	0 (0)	0 (0)	0 (0)	0 (0)	0 (0)	1.93698379682 (0)	-1.06816521146 (0.529779728776358)	0 (0)	-1.10686020677 (0.529779728776358)	0 (0)	0 (0)
Introns
	ACC MT_tRNA_fragment Pos	ACC MT_tRNA_fragment Neg	ACC N_tRNA_fragment Pos	ACC N_tRNA_fragment Neg	BLCA MT_tRNA_fragment Pos	BLCA MT_tRNA_fragment Neg	BLCA N_tRNA_fragment Pos	BLCA N_tRNA_fragment Neg	BRCA MT_tRNA_fragment Pos	BRCA MT_tRNA_fragment Neg	BRCA N_tRNA_fragment Pos	BRCA N_tRNA_fragment Neg	CESC MT_tRNA_fragment Pos	CESC MT_tRNA_fragment Neg	CESC N_tRNA_fragment Pos	CESC N_tRNA_fragment Neg	CHOL MT_tRNA_fragment Pos	CHOL MT_tRNA_fragment Neg	CHOL N_tRNA_fragment Pos	CHOL N_tRNA_fragment Neg	COAD MT_tRNA_fragment Pos	COAD MT_tRNA_fragment Neg	COAD N_tRNA_fragment Pos	COAD N_tRNA_fragment Neg	DLBC MT_tRNA_fragment Pos	DLBC MT_tRNA_fragment Neg	DLBC N_tRNA_fragment Pos	DLBC N_tRNA_fragment Neg	ESCA MT_tRNA_fragment Pos	ESCA MT_tRNA_fragment Neg	ESCA N_tRNA_fragment Pos	ESCA N_tRNA_fragment Neg	HNSC MT_tRNA_fragment Pos	HNSC MT_tRNA_fragment Neg	HNSC N_tRNA_fragment Pos	HNSC N_tRNA_fragment Neg	KICH MT_tRNA_fragment Pos	KICH MT_tRNA_fragment Neg	KICH N_tRNA_fragment Pos	KICH N_tRNA_fragment Neg	KIRC MT_tRNA_fragment Pos	KIRC MT_tRNA_fragment Neg	KIRC N_tRNA_fragment Pos	KIRC N_tRNA_fragment Neg	KIRP MT_tRNA_fragment Pos	KIRP MT_tRNA_fragment Neg	KIRP N_tRNA_fragment Pos	KIRP N_tRNA_fragment Neg	LAML MT_tRNA_fragment Pos
DNA.Sense	0.0120207499144 (0.999994471966)	1.23802083942 (0.307760259194394)	-0.644855392805 (0.489764676163767)	-0.650288622507 (0.760983498485061)	-0.945409034782 (0.662818333050842)	-0.259630819386 (0.999994471966)	-0.176785154448 (0.980893980105088)	0.628748143413 (0.160104465654212)	-1.14746830221 (0.096512786693976)	-0.0822658801016 (0.0399362420071928)	-1.21519142582 (0.0919433875175595)	-0.00742505345908 (0.149268013357078)	-0.353531731679 (0.98421531844853)	-0.0746350127377 (0.314005053285209)	-0.794268938485 (0.0831475893183896)	-0.869378157751 (0.993937278905824)	0 (0)	0 (0)	0.241380281503 (0.48335631990095)	0.331372127905 (0.460468588988757)	-0.880361729882 (0.2329821069935)	0.507936270959 (0.192357651365647)	-1.03028221051 (0.255562194702285)	-0.560479111694 (0.99414998508865)	-0.312499088747 (0.0784548547091178)	0.583503036478 (0.255095088823107)	-0.508549051109 (0.962320897606369)	-0.750752722162 (0.12908854344604)	-1.24728952579 (0.0258274929483691)	1.95502788159 (0.298407286099582)	-0.745557010193 (0.999994471966)	-0.0904510207048 (0.770398180992666)	-0.493346080027 (0.947056725228277)	1.03281628105 (0.242250261339017)	-0.398050367885 (0.962517091672034)	-0.490200757781 (0.994264215847411)	0.791257005291 (0.0462551789524106)	-0.243130882921 (0.773429307006601)	-0.319922652961 (0.996011080011172)	-0.768194653757 (0.99819610106341)	-0.713519446134 (0.982149441777951)	1.8582708453 (0.429128404040268)	-1.0314766069 (0.880768764984905)	-0.0764438913968 (0.464603931133807)	0.00615127674202 (0.524786854547122)	4.12754049209 (0.0747862123721872)	0.217409402939 (0.699330964190219)	0.373070391229 (0.49609839834906)	0.347962321036 (0.923862661296894)
DNA/Kolobok.Sense	-1.06267699329 (0.541099775958534)	-0.104277640872 (0.999994471966)	-1.02887302899 (0.541099775958534)	-0.429841760712 (0.703648175912044)	0 (0)	0 (0)	-0.142637782093 (0.842701844387994)	-0.671880646962 (0.832581861187496)	0.616889989567 (0.400063509584797)	0 (0)	-0.417562802664 (0.999994471966)	0 (0)	-0.812626986051 (0.338037544672933)	0 (0)	0 (0)	0 (0)	0 (0)	0 (0)	0 (0)	0 (0)	-0.392045413849 (0.99819610106341)	0 (0)	-0.545304166067 (0.965692253186387)	-1.06203974299 (0.379939432477119)	0.532248745345 (0.637835913863039)	-0.195939012129 (0.414193785621943)	0.194210329863 (0.980912549085533)	0 (0)	-0.450188261624 (0.7788321982307)	0 (0)	-0.647196454618 (0.984357942469367)	-0.503585246107 (0.999436600206421)	-0.407151380037 (0.99735959134868)	0 (0)	0 (0)	0 (0)	1.79053309056 (0.120652979408817)	0.0595039658649 (0.832581861187496)	-1.03581062089 (0.252601363473016)	-0.84636311484 (0.281950788773057)	-0.205880419128 (0.813657183618373)	0 (0)	0.144755431057 (0.414193785621943)	-0.207643919149 (0.813657183618373)	1.35548519726 (0.430858286741488)	-0.42624942663 (0.99819610106341)	1.4831382434 (0.423022605679713)	-0.526503176248 (0.99819610106341)	0.726950735789 (0.681967477787754)
DNA/MULE-MuDR.Sense	1.19399299194 (0.354452572483248)	-0.655510627649 (0.947558628122013)	-0.409277224588 (0.709267334502264)	1.31691782945 (0.512246253209712)	-0.482404894849 (0.999994471966)	0 (0)	0.552723195552 (0.802051622190369)	-0.616473704159 (0.960330172000353)	-0.740760073558 (0.0544497421080407)	-0.649159027511 (0.951830961842781)	-0.606001308734 (0.992768616038185)	-0.747030026495 (0.951830961842781)	0 (0)	0 (0)	0.0473101444805 (0.600664289849945)	1.62867217593 (0.508914411323501)	0 (0)	0 (0)	0 (0)	0 (0)	-0.40519535156 (0.999994471966)	-0.641306621413 (0.754336702762257)	-0.531978693592 (0.999994471966)	-0.619451079949 (0.997082408958578)	0.353498907039 (0.991160538893591)	-0.551721734716 (0.999994471966)	-0.286268489051 (0.580450104299497)	-0.869117866663 (0.658862237248196)	-0.550870309554 (0.975427429265534)	4.04857747115 (0.111721801957005)	0.597857360113 (0.982120111086399)	-0.926613250865 (0.59097304899764)	-0.558912394414 (0.764311804191639)	-0.503339306982 (0.809955058423509)	-0.439252559621 (0.809955058423509)	0 (0)	0.847585762033 (0.569899237874542)	-0.877626100138 (0.328766674531095)	-0.472818497896 (0.971132661757378)	-0.734173349216 (0.478998880495898)	-0.39220434312 (0.999994471966)	0 (0)	-0.590131809541 (0.999994471966)	-0.268918438892 (0.889312891441471)	0.814867352239 (0.832581861187496)	0 (0)	0.275508757083 (0.995185978303282)	1.75128399345 (0.422489090460658)	1.72448056935 (0.181801708527958)
DNA/Merlin.Sense	0 (0)	0 (0)	-0.450078583752 (0.984357942469367)	-0.509733142314 (0.490044520497791)	0 (0)	0 (0)	0 (0)	0 (0)	0 (0)	0 (0)	0 (0)	0 (0)	0 (0)	2.29685891817 (0)	-0.444626180214 (0.832581861187496)	2.42901125257 (0)	0 (0)	0 (0)	0 (0)	0 (0)	0 (0)	0 (0)	-0.362729818639 (0.490044520497791)	1.22555272027 (0.116041166592801)	0 (0)	-0.509424569003 (0.971132661757378)	0 (0)	0.789814135464 (0.703648175912044)	-0.346986573656 (0.703648175912044)	-0.480298130018 (0.448645778013808)	-0.438825498655 (0.999994471966)	1.2853393036 (0.703648175912044)	-0.489374345871 (0.999436600206421)	2.39960864757 (0)	0 (0)	-0.467180131052 (0.999436600206421)	-0.424245570757 (0.999436600206421)	0 (0)	0 (0)	0 (0)	-0.430924284108 (0.842414130744371)	0 (0)	-0.416176941278 (0.999436600206421)	-0.425720114599 (0.958838993362852)	0 (0)	0 (0)	0 (0)	-0.45463179255 (0.999436600206421)	-0.409117023912 (0.76522605554921)
DNA/PIF-Harbinger.Sense	0 (0)	-0.971470525941 (0.76522605554921)	0 (0)	0 (0)	0 (0)	0 (0)	0 (0)	0 (0)	0 (0)	0 (0)	0.401397622915 (0.611896785875962)	0 (0)	0 (0)	0 (0)	0 (0)	0 (0)	0 (0)	0 (0)	0 (0)	0 (0)	0 (0)	0 (0)	0 (0)	1.73297025166 (0)	-0.843665817218 (0.832581861187496)	0 (0)	-0.826417769446 (0.832581861187496)	0 (0)	-0.308312646508 (0.999436600206421)	0 (0)	1.31053852389 (0.14951683126273)	-0.16933499536 (0.832581861187496)	-1.24558640932 (0.541099775958534)	2.05331889661 (0)	0 (0)	-1.19521775569 (0.541099775958534)	-1.50255397624 (0.611896785875962)	-0.662195665125 (0.987250187515296)	0 (0)	0 (0)	-0.667472146699 (0.971132661757378)	0 (0)	0 (0)	0 (0)	-1.50244932089 (0.611896785875962)	0 (0)	0 (0)	0.424188635728 (0.611896785875962)	0 (0)
DNA/PiggyBac.Sense	0.664451770323 (0.961924099989783)	1.22384137774 (0.815936267493213)	-0.405236346424 (0.424444070580903)	-0.147062214188 (0.948138739765426)	-0.831822726339 (0.999436600206421)	0 (0)	-1.59990804326 (0.397266057468016)	-0.37715707519 (0.120433129286365)	-0.653752927878 (0.954944998885806)	0.204362932232 (0.529920969001271)	-0.321535830699 (0.999994471966)	1.28203145275 (0.0414996890300336)	0.131251403276 (0.999994471966)	0.783981925157 (0.687009953077305)	-0.159356152765 (0.543195616687339)	-0.584971618063 (0.986988290825272)	-0.399218036246 (0.991380831123609)	0 (0)	0 (0)	0 (0)	-0.934037575151 (0.747372187403564)	-0.687079441973 (0.849316600843361)	-0.335339649312 (0.151304724228807)	-1.10949200756 (0.480159129477347)	-0.0794625809136 (0.999994471966)	-0.438166678276 (0.953574245325773)	-0.135176656597 (0.967704796017004)	5.13128873364 (0.0522483884512942)	-1.67263664856 (0.0481007158272)	1.04757361323 (0.178647713755066)	-1.17462591006 (0.930852973179737)	0.572309453898 (0.822826752754512)	0.100655744895 (0.996379988450613)	1.82743050573 (0.162947977852552)	0.838022679823 (0.34677101445354)	-0.513887662615 (0.954128585624899)	0.463150441302 (0.239385624055368)	-1.5067390203 (0.591484424398146)	-1.29864540216 (0.0738623197426795)	-0.913481715792 (0.324655115336452)	-0.351743081099 (0.855334375187375)	5.44873989951 (0.73087545012852)	-0.97378374003 (0.875105529993385)	0.377319526948 (0.999994471966)	-0.016816192448 (0.622155463317134)	1.40541505443 (0.833577096251893)	0.391386831749 (0.51924320522639)	0.921860360115 (0.753357249518536)	0.255277002682 (0.999994471966)
DNA/TcMar.Sense	0.426366347966 (0.454573268898486)	-2.12485800027 (0.213239160779917)	-1.26176306564 (0.432842671585902)	-0.569863339966 (0.999994471966)	-0.358828167609 (0.593475210320649)	-0.112141711917 (0.859289625163353)	-1.59092459254 (0.345206912165663)	0.231528790651 (0.980893980105088)	-1.01769641392 (0.203426706115244)	0.825269172004 (0.119088925591956)	-1.5217008626 (0.38661680474648)	-0.131685092545 (0.782305169610452)	-1.23614434605 (0.263309674551267)	0 (0)	-0.121784839692 (0.184018843346122)	-0.879341373995 (0.963618151088496)	-0.54538512399 (0.841555243499223)	0 (0)	0 (0)	0 (0)	-0.675347939318 (0.800926346992325)	14.7520597276 (0.0587253920586667)	-0.57386979752 (0.999436600206421)	0.939711908898 (0.702104962949341)	-0.725301165299 (0.758737980349979)	-0.648390502953 (0.883166003653901)	-0.769752560548 (0.168284236324631)	1.87135380286 (0.175003675090589)	-0.84004541586 (0.247974144844228)	1.73542351816 (0.00885088666383537)	-0.280602844783 (0.837998510032982)	0.130537492395 (0.476826064765983)	-1.39758951179 (0.425998501764575)	-0.110262257983 (0.971132661757378)	-0.716587648825 (0.404154385274395)	-0.664974536457 (0.888649419308437)	-0.303922766737 (0.58790278611027)	0.670027522118 (0.973211209103701)	-0.184142265743 (0.948212773530447)	-1.52953812171 (0.75918198846209)	-1.28003267382 (0.408448285404333)	10.9273772895 (0.0939103666381956)	0.17774842056 (0.482422784008974)	-0.370275350809 (0.580292960740632)	-1.36865441046 (0.379622305732667)	0.819178619235 (0.59097304899764)	-1.13089416377 (0.832581861187496)	-1.06231624912 (0.661866600159005)	2.83863275529 (0.586594153093522)
DNA/TcMar-Mariner.Sense	-0.755321501186 (0.709370808669401)	0.475982525919 (0.755753206920779)	-1.0245006511 (0.711692593540377)	1.93222514438 (0.163928771256315)	-1.43527603176 (0.391649739160786)	-0.0720776332127 (0.429497058556439)	-0.511022519369 (0.818335949596633)	1.95961441181 (0.0147462276837878)	-1.85857025803 (0.0116686343966773)	2.85148991332 (0.032120960179284)	0.0667764739382 (0.649305503805579)	-1.5423586725 (0.402103547858149)	-0.607640421579 (0.687772605548371)	2.5561076582 (0.000754781314451527)	-1.44311562245 (0.156256690381663)	2.39368404085 (0.079287847890665)	-0.42111524247 (0.17131060957237)	0 (0)	0 (0)	0 (0)	-1.22775482049 (0.210853196456734)	9.9322455493 (0.00088042403318263)	-1.50802543282 (0.172406555820346)	1.15897474403 (0.93734074316818)	-0.609696123873 (0.38444595816109)	1.46686956789 (0.517735746538612)	-0.6956362537 (0.26653396202034)	5.29598074756 (0.40950085476659)	-1.84061625495 (0.0452913395185433)	3.91807311413 (2.55269671371972e-05)	-1.63030487154 (0.827997687486565)	1.02181283445 (0.202565763053294)	-1.59133995416 (0.023785541894253)	1.92181393629 (0.183695690303966)	0.437038810126 (0.460468588988757)	-1.48716743004 (0.330257285201853)	0.349428364688 (0.276508539633694)	2.574264589 (0.728962268119671)	0.0094973334235 (0.999994471966)	2.44093307183 (0.00354184987261021)	-2.15083050126 (0.0336239660655554)	12.3554682357 (0.0110875847794242)	0.116745179898 (0.325547081100078)	-0.0413244481382 (0.50200737858385)	-1.4213439259 (0.239657010744943)	7.08179490615 (0.0615599282902107)	-1.72076610379 (0.190616811131267)	3.31794006373 (0.00934806985975278)	-0.599122436352 (0.709267334502264)
DNA/TcMar-Pogo.Sense	1.05922860024 (0)	0 (0)	1.03621212703 (0)	0 (0)	0 (0)	0 (0)	0 (0)	0 (0)	0 (0)	0 (0)	0 (0)	0 (0)	0 (0)	0 (0)	0 (0)	0 (0)	0 (0)	0 (0)	0 (0)	0 (0)	0 (0)	0 (0)	0 (0)	0 (0)	0 (0)	0 (0)	0 (0)	0 (0)	0 (0)	0 (0)	-0.999546588052 (0)	0 (0)	0 (0)	0 (0)	0 (0)	0 (0)	0 (0)	0 (0)	0 (0)	0 (0)	0 (0)	0 (0)	0 (0)	0 (0)	0 (0)	0 (0)	0 (0)	0 (0)	0 (0)
DNA/TcMar-Tc1.Sense	0.114463130255 (0.982120111086399)	1.22359669128 (0.477076244994687)	0.0959346887497 (0.874540021309612)	-0.166293699574 (0.99735959134868)	-0.122701716436 (0.375646154330934)	1.16892753809 (0.113224330735344)	-1.05961190584 (0.17368331914811)	1.30315417531 (0.317213169750169)	1.17994123241 (0.98912678441339)	0.113775826057 (0.106323622506274)	-0.683027390702 (0.871258418431963)	1.8879612033 (0.020961308872168)	1.60995603236 (0.686092069903271)	-0.041900019886 (0.726633498100415)	-0.907161692224 (0.312524498339292)	2.75562842413 (0.289158732920309)	0 (0)	0 (0)	0 (0)	0 (0)	-0.0808786428167 (0.999994471966)	0 (0)	0.544605994885 (0.77622374523198)	-0.207939663567 (0.97706811460324)	0.0853035395806 (0.99819610106341)	0.840725219184 (0.440551862035167)	-0.418383299795 (0.999994471966)	2.17732029286 (0.993164285208481)	1.0390099865 (0.757974636580679)	0.69593319322 (0.179065920380801)	0.546907560207 (0.957172487804227)	-0.0904399504498 (0.999994471966)	0.903765963842 (0.90778772853387)	-1.12288767029 (0.821205597029704)	-1.09477551754 (0.465993120845608)	-0.728382313554 (0.959390337375128)	0.54093939465 (0.99819610106341)	-0.709307051117 (0.705007851113724)	-0.583525828391 (0.322090101486047)	-0.141221192591 (0.675219434966658)	-0.724120977862 (0.749619992831568)	0 (0)	-1.15781250897 (0.0946331457681861)	-0.854519360314 (0.816059194859052)	-0.850132503257 (0.388382193894292)	2.78008872536 (0.272436485301846)	-0.949227126467 (0.149413382063201)	1.5907919517 (0.465993120845608)	0.199121460487 (0.858900359098801)
DNA/TcMar-Tc2.Sense	-0.298611375192 (0.912692463132491)	-1.02503095551 (0.216913426798853)	0.0598208653605 (0.80543471523113)	0.245035765822 (0.308479079117339)	-0.873200788927 (0.718292135777499)	0 (0)	-1.01049819024 (0.412544197079415)	0.33864475272 (0.0961820392145075)	-1.93481171284 (0.153213966129848)	4.61988465154 (0.0234920920120481)	-1.61268959553 (0.689146332284239)	2.47393910784 (0.42059272303731)	-0.594896765082 (0.993529143044379)	3.54499332441 (0.34443404665267)	-1.07799388041 (0.443287929433881)	1.43892710904 (0.464016647626257)	-0.537335438917 (0.406768028131889)	0 (0)	12.5862069633 (0.012808092385647)	0 (0)	-1.76596263375 (0.111820487898093)	4.46046870688 (0.0677379924665245)	-1.88063061964 (0.091462137520033)	-1.60531432297 (0.651617961494369)	0.107397826769 (0.676444360016302)	-0.473514301748 (0.790060942915274)	-0.681800759626 (0.865737516639086)	6.22830642516 (0.0582863399251389)	-2.21116394767 (0.0586924374734558)	2.92772596373 (4.98813972784069e-05)	-1.86998913746 (0.108357625639104)	0.91235775845 (0.579988712820896)	-1.77364720619 (0.0718528260594571)	1.35707951679 (0.334484010027661)	1.67215765818 (0.956814001252997)	-1.20304271996 (0.49467489671576)	0.536602472572 (0.255529528760942)	-0.0284057106778 (0.0908235710723237)	0.0165491436969 (0.73351719077622)	2.73182491011 (0.961945925571656)	-0.885899216112 (0.184958282872852)	7.53027228452 (0.0179186075035248)	-0.213727932088 (0.570403875025374)	-0.698567372004 (0.926895853678562)	-0.564182212098 (0.995487677872094)	2.40271747692 (0.0214709229873099)	-0.551460358866 (0.924943059934876)	-1.2191451298 (0.982120111086399)	-0.861124678192 (0.925821854274613)
DNA/TcMar-Tigger.Sense	-1.24735889644 (0.947558628122013)	-0.560093116946 (0.663180076000929)	-1.65680545 (0.0274142491817473)	1.04578744579 (0.734225400497362)	-2.39825841417 (0.00476646413843801)	4.36239693216 (0.0344936521637617)	-3.07100675087 (0.0069814484977875)	2.86595308545 (0.0788207856172152)	-1.84170552338 (0.285159617340202)	2.89436444358 (0.0165318826056829)	-0.233425953139 (0.975181016987347)	0.854456366372 (0.106110026232542)	-2.61597803635 (0.00259882197286563)	4.79308245791 (0.00281221627493857)	-2.99134518943 (0.027336090544276)	3.6424029629 (0.404906544240236)	-0.429171866663 (0.999994471966)	0.290787748633 (0.337102539268254)	0.682497182693 (0.998048761851001)	-0.149329128111 (0.999994471966)	-3.25501681886 (1.35629549571052e-06)	8.62730008221 (0.00157464064279896)	-2.11116767956 (0.0177578315347659)	-0.550220741215 (0.15864188864311)	-1.08030032522 (0.814909832840587)	0.880359180259 (0.889241364331787)	-2.12129429475 (0.152833151941269)	3.47640167953 (0.000668949290152634)	-3.71918733619 (4.81909354259096e-06)	4.41434694373 (0.000234468743067825)	-3.37049891828 (3.50591001876708e-05)	1.36332517432 (0.203466857770423)	-3.63524685618 (0.0234255181475333)	4.80311168233 (0.000129398698192289)	0.908247614452 (0.982120111086399)	-0.787525886391 (0.967704796017004)	0.0136641957498 (0.172406555820346)	4.25045538948 (0.153157956317286)	1.25397736366 (0.311223988426549)	-1.14594991764 (0.328932501153897)	-1.57484693285 (0.704012502217807)	13.4245419897 (5.1318248551518e-05)	0.827517266775 (0.797564122691437)	0.110071821351 (0.813798816469837)	-1.50324466412 (0.688399111418002)	2.79676266303 (0.404154385274395)	0.279656369121 (0.999994471966)	0.863244826957 (0.984765917347783)	-1.27306328369 (0.442048329208414)
DNA/TcMar?.Sense	0 (0)	0 (0)	0 (0)	-0.711199124974 (0.832581861187496)	0 (0)	0 (0)	0 (0)	0 (0)	0 (0)	0.972337340469 (0)	0 (0)	1.03444575873 (0)	0 (0)	0 (0)	0 (0)	0 (0)	0 (0)	0 (0)	0 (0)	0 (0)	0 (0)	0 (0)	0 (0)	0 (0)	-1.04632741064 (0.999436600206421)	1.00979175105 (0)	-1.03677424883 (0.999436600206421)	1.02035359044 (0)	0 (0)	1.3979393295 (0)	-0.268153015307 (0.832581861187496)	1.42832719504 (0)	0 (0)	-0.985900008725 (0.999436600206421)	0 (0)	-0.971528269531 (0.999436600206421)	0 (0)	0 (0)	0 (0)	0 (0)	-0.781127863774 (0.999436600206421)	1.69162360782 (0)	-0.808035630252 (0.999436600206421)	0 (0)	0 (0)	0 (0)	-0.879818199615 (0.611896785875962)	0 (0)	0 (0)
DNA/hAT.Sense	-0.875187503182 (0.816966316825424)	0.126283466835 (0.948172561545755)	-0.676404735067 (0.733705704369962)	0.488610438097 (0.0722214397675583)	-0.298600078477 (0.946801656883254)	0.566604954161 (0.968155402999042)	-1.1300757821 (0.524786854547122)	0.801650754784 (0.999994471966)	-0.824520218983 (0.254121074352232)	0.190684095021 (0.186177277329371)	-0.544390343818 (0.645916214888808)	-0.276562822076 (0.76522605554921)	-0.571046703092 (0.885953869386885)	0.727249921043 (0.061540664084656)	-0.358856828046 (0.56117639951681)	4.22852286184 (0.335914859300122)	-0.24369625494 (0.67237402715217)	3.74211598765 (0.0593923671526577)	0 (0)	0 (0)	-0.957097361958 (0.524550394837379)	1.0724282712 (0.419006139475048)	-1.32967123403 (0.0639602436225942)	-1.19198700285 (0.593283684201121)	-0.774991491834 (0.552361096563646)	2.27207059878 (0.752127877205655)	-0.966626091152 (0.421325995172037)	-0.772983544117 (0.999994471966)	-1.14838165982 (0.0379256567138073)	0.114771833556 (0.0178067491796512)	-0.456191983544 (0.9252033105777)	-0.639695655947 (0.621828188484524)	-0.989731999328 (0.260590096572599)	-0.471996217746 (0.999994471966)	-0.602087452449 (0.750785030117299)	2.59202990576 (0.993937278905824)	-0.401717308392 (0.835456342250549)	1.8602981582 (0.277631092959043)	0.738231851408 (0.710803672756571)	2.71361241272 (0.0985784585293616)	-1.57509215559 (0.010001546595776)	8.97561635992 (0.00198092340512651)	0.542104526008 (0.286329676240395)	0.650797717754 (0.716995949722435)	-1.72127220975 (0.176345345649878)	3.98837957734 (0.0125559483083479)	-1.4973363969 (0.452544348742447)	0.741911725337 (0.0624973426558903)	6.11376848185 (0.0603775793639558)
DNA/hAT-Ac.Sense	-0.202657327875 (0.901458215536617)	0.753148396336 (0.998437047739011)	-1.2672793712 (0.303327694884216)	0.531711292981 (0.48237446904697)	-0.960621342959 (0.693269065953633)	2.46870878523 (0.21181355347818)	0.260814538872 (0.951830961842781)	0.291168369174 (0.730555859529884)	-1.06867735691 (0.474061190919506)	0.164198944236 (0.174296474482674)	-0.745560353573 (0.919334394750579)	-0.202661552019 (0.263878698689772)	-0.820618024651 (0.787556071131871)	0.387462404073 (0.326590203874788)	-0.837631275053 (0.606687573817607)	0.358386652781 (0.391423114741708)	-0.348739017845 (0.984357942469367)	0 (0)	-0.261311962074 (0.971132661757378)	0 (0)	-0.615459171748 (0.299369621290607)	3.72423474476 (0.476826064765983)	-0.6914901296 (0.682065687144718)	-1.53073995957 (0.199583852077485)	-1.51022778764 (0.575500730922623)	-0.120004166599 (0.703298699308488)	-1.58197372626 (0.233797663004996)	0.24001301425 (0.330082060221085)	-0.786024145427 (0.471539276462538)	0.723380358438 (0.354452572483248)	-1.31975452861 (0.37501119443605)	-0.994121869318 (0.903285870445511)	-1.33985322049 (0.347642487118572)	1.39586552518 (0.0732522266296104)	1.87041087534 (0.648317620380162)	-1.19603143735 (0.447716543702916)	-1.09956100261 (0.753357249518536)	1.13063177465 (0.441979093706193)	-1.14246432802 (0.0186566072383685)	0.780705291805 (0.0443716858362751)	-1.62677130471 (0.0940919475420383)	3.50505843551 (0.353854039579262)	-0.0338564854833 (0.93778652711831)	-1.29813245333 (0.553469022013852)	-0.346103661417 (0.999994471966)	-1.11347271476 (0.8053543517682)	1.74581317087 (0.556994814629882)	0.962905887729 (0.152833151941269)	-0.648162004879 (0.0631485323695434)
DNA/hAT-Blackjack.Sense	1.32650183314 (0.919380675143664)	-1.22831418849 (0.801813455553647)	-0.864776007939 (0.391902565064734)	4.64830142262 (0.0878064366758421)	0.0796451494004 (0.583629487333568)	-0.561738632569 (0.662511021614188)	-0.641461017835 (0.998437047739011)	3.54389602348 (0.0852336511551747)	-0.210163059372 (0.513814939305855)	5.35454948813 (0.0428390102533795)	2.30006706754 (0.0674895053713094)	3.34901853371 (0.0725861864547833)	0.0569588811024 (0.0792076757318285)	3.69402608358 (0.167395894395473)	0.306744525433 (0.00918809809456211)	4.34648816305 (0.134063494594996)	-0.446342987324 (0.269107722901811)	1.49349023932 (0.239925753496205)	0 (0)	-0.370394501009 (0.973211209103701)	-0.182291997134 (0.714199323910503)	4.42577534389 (0.00130316850914672)	-0.985295197258 (0.120478718037521)	-0.097954275024 (0.980893980105088)	-1.34014076284 (0.321242741276441)	1.22331823311 (0.532638201140066)	-2.66417959383 (0.0220799584805393)	1.98274710607 (0.186749893299786)	-0.886746715856 (0.201661612047967)	3.87886887584 (0.0120204713181001)	-0.258244399572 (0.29799429090195)	1.96905927724 (0.356540717040441)	-1.87077057167 (0.0087942352920576)	2.32393851185 (0.0178385440687642)	0.67997413105 (0.932146653252154)	-0.288044277823 (0.577247085433135)	-0.439215601687 (0.740004556055601)	1.56893175637 (0.0824470319315805)	0.404023719272 (0.706781764251182)	4.1843323242 (0.000165310068419179)	-2.40302281118 (0.00604654543253438)	1.15247563544 (0.0620956964168453)	-2.54472706997 (0.332482171269008)	-0.696597304524 (0.739323556529312)	-1.27247241957 (0.037549723774798)	2.53968739374 (0.0869968248374228)	-1.67541833176 (0.178402772076034)	3.31693247343 (0.0215526708374969)	-0.262094322668 (0.777046071750919)
DNA/hAT-Charlie.Sense	-0.274578628481 (0.999994471966)	1.19757351034 (0.185760164811565)	-0.681996232763 (0.762529555167819)	2.83872466796 (0.472979388214186)	-0.791074502525 (0.676464226335371)	0.840245910776 (0.930396961453456)	-0.674671466777 (0.673697719136166)	1.66654670461 (0.420311241303083)	-2.38516258825 (0.00264888450092574)	2.95916412186 (0.26252381617555)	-0.314086467509 (0.0701554355924831)	1.93632468192 (0.669175890466521)	-1.75565894254 (0.18524829050473)	4.74159881431 (0.041489942271553)	-0.863350222671 (0.99414998508865)	3.47742703276 (0.075509350873407)	-0.81804137942 (0.836984634514108)	0.584452584331 (0.725586757281386)	-0.280358690351 (0.699708950224617)	0.431845365008 (0.983409403963384)	-2.10049861721 (0.449185817889023)	8.91183682004 (2.31244210880092e-05)	-2.83390152376 (0.256177723362221)	3.11727918181 (0.286838599665197)	-3.60143618682 (0.0931947275028257)	6.74033699553 (0.0122888663271242)	-2.53669989653 (0.662670242001972)	5.50565394224 (0.00524928640636272)	-2.99864005182 (0.219140156771993)	2.91895615999 (0.0507204736483253)	-1.50313074575 (0.935208570977726)	2.48051476851 (0.236305269557897)	-3.00864872768 (0.0162776148688559)	5.9303625246 (0.0212411689426464)	3.12047114069 (0.514169640071608)	-2.29079287288 (0.0197198434582758)	-2.80702317257 (0.215708845384641)	4.78755471132 (0.0163160025361261)	-0.805073720338 (0.769380977658906)	1.84070182151 (0.368899694745403)	-4.3017763627 (0.00121963808099199)	11.5206593554 (1.51227442916831e-05)	1.26151910268 (0.55487376994552)	1.09830334212 (0.916088514866294)	-3.47182781236 (0.0237162909914397)	4.99505512194 (0.00232858905035688)	-2.90476635148 (0.0193116190383827)	3.826640529 (0.0267666708411664)	-0.874669166382 (0.367377718611143)
DNA/hAT-Tag1.Sense	0.364004182873 (0.702719364273281)	-0.144486499884 (0.999994471966)	-0.147048267466 (0.999994471966)	-0.666088048243 (0.999994471966)	-0.610634052545 (0.797925036764317)	-0.403846863921 (0.998656471795428)	-0.986190617788 (0.44864533206335)	0.75308673675 (0.0597705129254385)	-0.821816920962 (0.580679092952195)	0.796878704312 (0.346145120736057)	-0.934417814915 (0.321930709458125)	0.204004841866 (0.999994471966)	0.204735859399 (0.642343906425585)	1.94496067707 (0.508914411323501)	0.0324049879872 (0.918584053128935)	1.81444734507 (0.270561822900207)	0.405422297639 (0.446343541345414)	0 (0)	0 (0)	0 (0)	-0.401398139604 (0.987766177017287)	-1.0640380289 (0.580679092952195)	-0.862247363472 (0.405057907222348)	-0.735983734559 (0.769395863159693)	-1.23288098635 (0.679230763238862)	4.01891844089 (0.984357942469367)	-1.11273116176 (0.7788321982307)	-1.05625990691 (0.969936713460053)	-0.402654249551 (0.216467308584476)	-0.924304665823 (0.947121773850118)	-0.537488063406 (0.956727704656576)	1.95868727295 (0.519009256023055)	-1.25012798249 (0.026145225728552)	-0.6806016223 (0.387726164735299)	-0.443960617907 (0.844945659714629)	-0.848496438137 (0.138135325745929)	-0.791981565071 (0.577554066929771)	0.82523705795 (0.981684907982628)	-1.00199844523 (0.520587520630734)	0.765006174907 (0.703648175912044)	-0.586226317414 (0.787654428927821)	-0.387263086249 (0.807781249447717)	-1.24551149525 (0.126330879145409)	-0.986397237421 (0.959390337375128)	-0.493798353084 (0.982205681945472)	-0.898082527321 (0.961037653670925)	-0.462856049731 (0.999436600206421)	0.958062979786 (0.16740912157006)	-0.344235872848 (0.99414998508865)
DNA/hAT-Tip100.Sense	0.750892617017 (0.914383886975021)	1.3603071319 (0.551137080275764)	0.00547912248109 (0.811440315933094)	0.956387255005 (0.81620381115902)	-0.652901434524 (0.983409403963384)	-0.324492350826 (0.198298726650435)	-0.675748789621 (0.0526691660540986)	1.36800699653 (0.441382061321078)	-1.24211354526 (0.976666282197637)	-1.79143029121 (0.522405348700532)	0.183865339131 (0.00169799683843879)	-1.79055735872 (0.398286971470756)	-0.771904741174 (0.690050200967191)	-0.854414429817 (0.999994471966)	-0.986600190122 (0.135688461197425)	-0.489668267879 (0.891359521718669)	-0.519861321457 (0.821205597029704)	0 (0)	-0.33426651896 (0.969936713460053)	0.760040635822 (0.39084192831284)	-0.663321244137 (0.966243490953017)	2.56007251044 (0.432365274358519)	-0.322025557547 (0.913003211043089)	1.1365074963 (0.474007823391666)	-2.99776575089 (0.00405914315149912)	0.744409487444 (0.2410422481899)	-2.87150211262 (8.01454053890339e-06)	0.567939224653 (0.255213531246616)	-0.641895812656 (0.999436600206421)	2.17931548762 (0.101658307959248)	-0.362180554043 (0.644011435710634)	-0.800384983877 (0.460468588988757)	-1.79018370368 (0.00396909191982992)	0.0145026004013 (0.638018125633623)	0.622403297969 (0.869136210670257)	-2.17873266525 (7.22075725050141e-05)	-2.30135895703 (0.0106340411835264)	5.50226509907 (0.139347168510716)	-1.09606372357 (0.255011653118902)	3.93138657829 (0.00063660869726416)	-3.12164549648 (6.10916548837695e-06)	15.3129000881 (0.00402918659449128)	-0.0165287326857 (0.358818135648779)	-0.299123831392 (0.337857181340686)	-2.67451552357 (0.00476397825877076)	10.8954369391 (0.0338036776043343)	-2.59749061051 (0.0420186578907473)	5.8004042013 (5.91625465282976e-05)	-0.615849160072 (0.488208165678155)
DNA/hAT-Tip100?.Sense	-0.81757721886 (0.972659109062507)	1.55316888802 (0.999994471966)	0.959952123905 (0.815478146588498)	3.10747479565 (0.512027340002307)	0.0369144306097 (0.998157444469676)	0.637341467872 (0.434154411458635)	0.920747184175 (0.391681861397382)	0.106868223672 (0.554541415532204)	-0.580665772085 (0.477390879095941)	0.153165751463 (0.829465762217259)	-0.275841559191 (0.999994471966)	-0.89280753056 (0.958663372476576)	-0.324692979493 (0.982120111086399)	0 (0)	-0.853355346635 (0.951830961842781)	-0.99060500606 (0.99415941338706)	0 (0)	0 (0)	0 (0)	0 (0)	-0.605878066035 (0.365943737610355)	0 (0)	-0.777001747311 (0.443538826798411)	0.421829794754 (0.826222717309788)	-1.01669978642 (0.948038976149686)	2.13041503084 (0.895991522606802)	-1.19727888753 (0.408043141183266)	-0.033876566222 (0.838224478407505)	0.502411627658 (0.326308769474934)	1.23511397869 (0.104384843875932)	-0.554450945279 (0.999436600206421)	-0.392383955655 (0.681581854584486)	-1.00007291488 (0.188114618387141)	0.23355709391 (0.999436600206421)	0.245919513554 (0.826250241627896)	-0.822075492113 (0.840218573777649)	0.689994851881 (0.999994471966)	-1.68366773325 (0.204151622772623)	-0.0947341240116 (0.753458291622117)	3.75759816027 (0.0637333125078313)	-1.31926266007 (0.0621584878934764)	0 (0)	-1.60087506292 (0.0450122120883709)	-0.210067321001 (0.992787743622893)	-0.670776782282 (0.998638167599375)	3.54373882171 (0.832581861187496)	0.00961362215853 (0.953962236938014)	3.72161848715 (0.0480821733566462)	-1.38551111434 (0.396371049758894)
DNA/hAT?.Sense	-0.636747954084 (0.963618151088496)	-0.132804989382 (0.215708845384641)	0.525954260256 (0.325288549880791)	-0.210635311686 (0.847663283233403)	-0.264080968735 (0.880671076594231)	-0.275251483479 (0.971132661757378)	-0.486841462846 (0.801779651376768)	-0.35747686599 (0.450166820844667)	0.301251948445 (0.971132661757378)	0.69609947819 (0.0959388156938779)	0.105161607083 (0.789391963170625)	-0.0168415520197 (0.228263144716784)	1.5471028872 (0.541099775958534)	0.0245208487918 (0.990921977269221)	-0.437117698837 (0.222589190652001)	0.130382283157 (0.867434730272)	0 (0)	0 (0)	0 (0)	0 (0)	0.353082969033 (0.999436600206421)	0.487819707488 (0.527073503606941)	0.492219358703 (0.999994471966)	0.577052403067 (0.494338823111128)	-0.482316274845 (0.955403409744013)	0.763265164101 (0.367377718611143)	-0.458535304245 (0.999994471966)	-0.0718835524907 (0.274702743680568)	-0.780213692227 (0.248491473153004)	1.25339405896 (0.217231785069194)	-1.42186920837 (0.217231785069194)	1.39592658099 (0.249982780888536)	0.0975965200201 (0.999994471966)	0.716054679965 (0.500349532077401)	-0.734100594582 (0.242251834863092)	-0.934549825931 (0.653369047983655)	-0.524479881431 (0.987250187515296)	-1.09576134619 (0.202625564115648)	-0.739086791883 (0.984357942469367)	2.76563086731 (0.327557334834225)	0.109805017232 (0.839846771720349)	1.13635882923 (0.43933810088675)	0.610316357739 (0.960066306516443)	-0.660047661193 (0.999994471966)	-0.187969416496 (0.999994471966)	-0.776154539805 (0.999994471966)	-0.348805090616 (0.999994471966)	0.60976926181 (0.603249581071137)	1.42311723937 (0.744098441030025)
DNA?.Sense	-0.259867559173 (0.999994471966)	1.0793246436 (0.714396526001838)	1.61593977732 (0.738067897329653)	-0.622752611819 (0.998239108301416)	1.81108557886 (0.787556071131871)	0 (0)	-0.725490598221 (0.398488176632847)	1.18301086705 (0.072816938737054)	-0.429475491643 (0.245930878170724)	0.656986329238 (0.210253429896448)	-0.322157432769 (0.438883591136452)	-0.489310590348 (0.539977737180407)	-0.201070525053 (0.83290462024744)	17.3206127588 (0.0218454030110504)	1.22180274351 (0.273321255999112)	0.395627515809 (0.632678166766059)	-0.243189827409 (0.986059945057905)	0 (0)	0 (0)	0 (0)	1.06646647731 (0.42078388100945)	0.360574057481 (0.581117167886905)	-0.562967332265 (0.0457413197686497)	-0.787945579093 (0.375401580403093)	-0.805169437549 (0.916088514866294)	-1.28576645058 (0.459000916827844)	-0.265803636721 (0.41874432665645)	0.110657556048 (0.467387236671394)	-0.191989495852 (0.88019802823183)	0.897323693119 (0.0450628436944895)	1.76142190802 (0.980893980105088)	-0.071272532249 (0.719598913660619)	-0.690942427367 (0.326512770284163)	-1.33364073701 (0.0747727381704492)	-1.03139848936 (0.12061585973353)	-0.813742449517 (0.0206779932784173)	-0.51550958059 (0.95593967778261)	-1.23914376903 (0.265570614314926)	-0.557162276342 (0.83519252912764)	7.25677722741 (0.178340781967579)	-0.749022862638 (0.558015479455864)	0 (0)	-0.89672068658 (0.657272064186068)	-0.817915807793 (0.385986952199322)	-0.37500099156 (0.644437482120863)	-0.611882572131 (0.999994471966)	-0.169870127815 (0.172406555820346)	-0.939985362969 (0.406542187214664)	-0.574111690985 (0.672880484502161)
DNA?/PiggyBac?.Sense	-0.145244568797 (0.465988490599399)	-0.284050870686 (0.97706811460324)	-0.162342675023 (0.325293464811223)	0 (0)	-0.14726807103 (0.982120111086399)	0 (0)	-0.195026883521 (0.999994471966)	0.623305843214 (0.468308907598548)	-0.346255407669 (0.774965075343652)	0 (0)	-0.445649342865 (0.372125216470997)	0 (0)	0 (0)	0 (0)	0.0415043700269 (0.703648175912044)	0 (0)	0 (0)	0 (0)	0 (0)	0 (0)	-0.29002860637 (0.999994471966)	0 (0)	1.30053879086 (0.712467048772167)	-0.313519788011 (0.656319021308632)	0.778514970654 (0.703648175912044)	-1.00046789461 (0.617141518651723)	-0.0558418828473 (0.971132661757378)	0 (0)	0.616156622172 (0.468637871197454)	-0.469825158628 (0.992768616038185)	-0.25787511974 (0.498205031193399)	-0.476169238642 (0.992768616038185)	-0.79698767986 (0.585582255083179)	-0.794888394713 (0.585582255083179)	-0.741762672802 (0.585582255083179)	0.631694397974 (0.238800875244848)	-0.485574515283 (0.660257264428642)	-0.4629845806 (0.951830961842781)	-0.389918425437 (0.768510662902553)	0 (0)	-0.392031289988 (0.999436600206421)	0 (0)	-0.45031810189 (0.842701844387994)	-0.208894028659 (0.55613486270385)	0.489679985698 (0.562256658273997)	0 (0)	0.0599149989275 (0.656319021308632)	1.10576319793 (0.959390337375128)	-0.719714660964 (0.685638366744821)
DNA?/hAT-Tip100?.Sense	-0.317047585848 (0.685638366744821)	5.560905004 (0)	-0.353017985871 (0.992768616038185)	-0.282003502769 (0.832581861187496)	1.09396452298 (0.656319021308632)	0 (0)	-0.332266592626 (0.999994471966)	3.07491149025 (0.26341965357677)	-0.40167565215 (0.958838993362852)	0 (0)	0 (0)	-0.101117795915 (0.585582255083179)	-0.621920745173 (0.514169640071608)	0 (0)	-0.669027571538 (0.514169640071608)	-0.673739070762 (0.514169640071608)	0 (0)	0 (0)	0 (0)	0 (0)	0.269387099187 (0.285830084893205)	0 (0)	0.258402646265 (0.285830084893205)	-0.521896795716 (0.99819610106341)	1.92320362903 (0.109220460958583)	0 (0)	-0.358275340264 (0.971132661757378)	0 (0)	-0.220892615722 (0.193409574101306)	0 (0)	-0.51668703002 (0.656319021308632)	-0.69330923915 (0.562256658273997)	-0.521732398482 (0.967024660919848)	-0.661409979528 (0.430858286741488)	0 (0)	-0.601771574215 (0.430858286741488)	-0.539806685082 (0.443538826798411)	0.831343890081 (0.789291331219703)	0 (0)	1.40683917092 (0.951830961842781)	-0.277127781914 (0.802949493824647)	0 (0)	-0.624805187734 (0.768510662902553)	-0.60475506864 (0.744098441030025)	-0.540858785639 (0.484947443616696)	0 (0)	-0.582272290291 (0.703648175912044)	3.13831604736 (0.275394445168862)	-0.599750041191 (0.642343906425585)
LINE/CR1.Sense	-1.20523875427 (0.716995949722435)	2.37734632903 (0.245067218514318)	-1.66543985139 (0.305213984803412)	3.43729880284 (0.323594549535827)	-0.521108675937 (0.895280699049329)	-0.273870041062 (0.89710848088012)	-1.10049847329 (0.840218573777649)	0.915524941095 (0.180430067046777)	0.113020814306 (0.913003211043089)	2.54167546205 (0.158483084068079)	1.60117560823 (0.339247521456605)	0.286168138346 (0.849316600843361)	-0.686313399552 (0.970302098062726)	3.17740720706 (0.0797563881086112)	-1.87811882839 (0.0775232351525415)	1.02262986939 (0.470622516138631)	-0.44923936513 (0.646363767080423)	1.1553162472 (0.219719185595923)	0.173048757595 (0.971132661757378)	3.46536250343 (0.0756217806286024)	-0.751674288374 (0.812352900978787)	4.43269631743 (0.111145706215118)	-1.0049749651 (0.874540021309612)	1.03130042064 (0.228263144716784)	-1.55109485398 (0.329704225285042)	6.17801025429 (0.737767925948724)	-1.47911522644 (0.273321255999112)	4.84600016592 (0.00239063633230037)	-1.65018702805 (0.0261195861147926)	2.87941333969 (0.0069814484977875)	-0.52613447967 (0.528940549154805)	0.272063020973 (0.99501867611433)	-2.29263647446 (0.0164142485675213)	2.88563872195 (0.0931947275028257)	1.66650561126 (0.991790533800725)	-1.92974159781 (0.0814583694641527)	-2.21309020804 (0.0289540221067437)	6.30960684851 (0.00172762666188895)	-1.97770273589 (0.296291211520781)	2.57944841546 (0.07272593132544)	-2.72043861 (9.96497485557981e-05)	15.4461941832 (0.0037364561231238)	1.06892829468 (0.684714695394747)	1.64620311682 (0.559419253500853)	-2.33831075471 (0.0166855366514785)	5.76328127054 (0.0161257520804362)	-1.53555948337 (0.0178338791819961)	2.17754014865 (0.00275329076544397)	-0.212555269683 (0.960079534109937)
LINE/Dong-R4.Sense	0.728192228679 (0.952848181820054)	-0.754064187476 (0.957172487804227)	-0.586838623917 (0.999436600206421)	-0.363241098796 (0.948808012129607)	-0.984101993229 (0.425106511455846)	0 (0)	-0.747811531737 (0.698514176295661)	1.73737618052 (0.327736691555571)	-0.916506390736 (0.0634406562888365)	0 (0)	-0.923874717065 (0.55376930867346)	0 (0)	-0.634245840846 (0.999436600206421)	0 (0)	-0.589348034485 (0.999994471966)	0 (0)	0 (0)	0 (0)	0 (0)	0 (0)	-0.710761988903 (0.676205666348101)	0 (0)	-0.818126473663 (0.503212740865692)	-0.633822441154 (0.702616093897668)	2.01947686366 (0.293172439121526)	-0.94804158836 (0.597533783873032)	-0.472340054943 (0.999994471966)	-1.03641499619 (0.723633586260857)	-0.433706271566 (0.971132661757378)	0.0296408225929 (0.808183765096691)	-0.183458876317 (0.570660676278322)	2.26131837068 (0.321828871028765)	-0.538086686803 (0.996379988450613)	0 (0)	-0.155859829115 (0.798152948610191)	-0.157602974045 (0.798152948610191)	1.15425505836 (0.578342481403566)	-0.899581455787 (0.823767438194607)	0.198887846047 (0.999994471966)	-0.619293920361 (0.996379988450613)	-0.361028277918 (0.364067778593334)	0 (0)	-0.555524200642 (0.990921977269221)	-0.0888506968786 (0.990921977269221)	3.09021856902 (0.288783489295522)	0 (0)	3.53825309309 (0.288783489295522)	-0.522361585657 (0.296396813715441)	-1.20904439359 (0.196923076923077)
LINE/Jockey.Sense	-0.303668376526 (0.541099775958534)	-0.59488617109 (0.685638366744821)	1.43308764773 (0.60736696660254)	0.29624657009 (0.768379477412506)	0 (0)	0 (0)	0 (0)	0 (0)	-0.140078611692 (0.951830961842781)	0 (0)	-1.26334073998 (0.233822308331027)	1.2980234553 (0.386106032906764)	0.585951668703 (0.733705704369962)	0 (0)	0.600226838947 (0.733705704369962)	0 (0)	0 (0)	0 (0)	0 (0)	0 (0)	-0.856395023893 (0.542692806049078)	0 (0)	-0.694286208949 (0.660257264428642)	-0.495665124409 (0.947558628122013)	-0.594124818029 (0.982120111086399)	0.894565515317 (0.527073503606941)	-0.284585911805 (0.789291331219703)	2.19562169392 (0.288783489295522)	0.504696857452 (0.999436600206421)	0 (0)	0.316193216121 (0.782566959893774)	1.5635483014 (0.603090935413942)	-0.49155082945 (0.705345407124787)	-1.11803307764 (0.52281841331802)	0 (0)	-1.09106450945 (0.1368073780116)	0.487352476306 (0.527073503606941)	1.80373048265 (0.32896552433415)	0.00770440116797 (0.974868140203694)	1.67861467359 (0.32896552433415)	-1.24620917654 (0.210253429896448)	0 (0)	0 (0)	0.239806043652 (0.992187944645187)	0.337487068431 (0.648317620380162)	0 (0)	-0.393551906906 (0.999994471966)	-1.74809618429 (0.210253429896448)	0 (0)
LINE/L1.Sense	-2.41903362722 (0.0173596504785832)	2.78199471475 (0.0481534838836734)	-1.6226960057 (0.7458709108671)	-0.0833078866505 (0.883174240079773)	-1.97720753656 (0.021068551737303)	0.42583333759 (0.998142347603678)	-0.675588994565 (0.104048844249931)	-0.966095634605 (0.518848704676904)	-2.23018117485 (0.156729452100955)	0.0243671360913 (0.760841653971866)	1.03546403079 (0.934851201055228)	-1.61458637703 (0.5614262050095)	-2.68693537869 (0.000635184974467304)	1.89130962431 (0.291369546723461)	-0.19036157115 (0.472547599974368)	-0.257104474335 (0.959742746512144)	-1.09924793382 (0.210420783714254)	-1.39646347189 (0.320543130083654)	-0.761903792375 (0.466548848140316)	-0.876237376233 (0.592098797871474)	-2.61131786054 (0.125198272686639)	1.96453406376 (0.453649172614728)	-1.27810836576 (0.638689386109541)	-2.13636833749 (0.121948465802745)	-1.41679188221 (0.79710471854731)	1.81819548493 (0.949105396461132)	-0.357427946447 (0.981513292267197)	0.354018508409 (0.999994471966)	-1.6070064604 (0.23403346721109)	-0.965162180526 (0.374019641628715)	0.261413650803 (0.991160538893591)	0.0647714224979 (0.590253149778795)	-3.38111824556 (0.0289285012201286)	1.61728744207 (0.733705704369962)	2.20076492875 (0.85170295289711)	-0.228525726451 (0.953488336232662)	-0.0525675214546 (0.352030000645156)	2.63663967604 (0.660457081048125)	0.637092036142 (0.498205031193399)	-2.63712601149 (0.100871483043303)	-0.421044914545 (0.818451701302252)	2.01089482171 (0.805553436570295)	-1.56642306313 (0.270436825882065)	-0.627451412721 (0.959860425556111)	-0.819278705281 (0.881664216229676)	1.20735926798 (0.850197675134133)	2.08105641739 (0.472547599974368)	-1.70658356385 (0.512243769901741)	-4.33130171964 (0.00308530425316549)
LINE/L1-Tx1.Sense	0 (0)	0 (0)	0 (0)	0 (0)	0 (0)	0 (0)	0 (0)	0 (0)	0 (0)	0 (0)	0 (0)	0 (0)	0 (0)	0 (0)	1.01508485402 (0)	-1.41772668315 (0.832581861187496)	0 (0)	0 (0)	0 (0)	0 (0)	0 (0)	0 (0)	0 (0)	0 (0)	1.05937776274 (0)	0 (0)	0 (0)	0 (0)	-0.42928521888 (0.999436600206421)	0 (0)	-0.932943044109 (0.703648175912044)	-1.50482931672 (0.703648175912044)	0 (0)	0 (0)	0 (0)	0 (0)	0 (0)	0 (0)	0 (0)	0 (0)	0 (0)	0 (0)	0 (0)	0 (0)	1.0324574964 (0)	0 (0)	1.03675917697 (0)	0 (0)	0 (0)
LINE/L2.Sense	-2.89604932167 (0.00779161610181209)	1.62776294945 (0.524614617744676)	-0.659507644587 (0.999994471966)	0.0396185596132 (0.414777997307541)	-0.399472968404 (0.0249203253624334)	0.0604602688559 (0.923137853197447)	-1.63679934117 (0.479108578403496)	0.677834617405 (0.625585937655038)	-0.861068417529 (0.929365362845164)	1.31198091963 (0.875702581762796)	1.78628915356 (0.52614685471008)	-0.934458625218 (0.235873487319065)	-1.65961701326 (0.454717768285106)	2.94253448975 (0.287853095517288)	-0.894644572215 (0.968380338875381)	2.38154572715 (0.223209692993976)	0.595728543303 (0.671359292090037)	0.920344126892 (0.691281969205682)	0.831763805055 (0.556776129011634)	-0.646424234577 (0.999436600206421)	-1.48966661799 (0.100516976305873)	8.77703971935 (0.000441470683253061)	-1.96360739279 (0.353061464682611)	3.47980676147 (0.0938831077379072)	-4.75165846443 (0.0209030604882856)	6.74486309546 (0.0224454684773265)	-2.7041277788 (0.192217437070188)	7.68527910697 (0.000345113941295744)	-0.857949529717 (0.00120698381002747)	4.53558882353 (0.0520624521241942)	-0.966372314458 (0.579036139213686)	-0.711113626158 (0.795582143379117)	-3.29579722894 (0.0261580963676034)	5.38851498767 (0.00411324558517623)	3.00531087596 (0.417035500610934)	-2.65687409685 (0.115702788030663)	-2.7449825836 (0.13833912382234)	4.1902750076 (0.232061287134622)	-1.86382203334 (0.852474960347644)	3.36161205651 (0.0599167787970324)	-3.35648484844 (0.12671011163065)	12.4128895578 (8.90950762461877e-07)	3.52096483868 (0.468346596831594)	3.23715468883 (0.774914144329608)	-2.55940664145 (0.450743108975878)	5.1200009523 (0.137307169378735)	-1.26841132391 (0.872554323360421)	4.13006983043 (0.158571497333591)	-1.14357118703 (0.0443093221394124)
LINE/Penelope.Sense	0.280409736802 (0.300235999473238)	-0.832776119898 (0.654576022925728)	-0.751651948204 (0.789837796387314)	0.479085309866 (0.986313599902971)	-0.196545622762 (0.97706811460324)	0 (0)	-0.414040060232 (0.954944998885806)	0.158097260965 (0.636990733899528)	-0.61238620728 (0.335284270852912)	0.0790066076857 (0.135701276662896)	-0.214913961465 (0.99414998508865)	-0.109024391631 (0.0665598362580222)	-0.308251514157 (0.958642705932207)	0 (0)	-0.695422989658 (0.515892090082971)	-0.353459896903 (0.68564249058756)	0 (0)	0 (0)	0 (0)	0 (0)	-0.65253521564 (0.0781546186703403)	0 (0)	-0.6389352753 (0.194635481492653)	-0.745716256923 (0.194635481492653)	-0.810096766277 (0.949716649355987)	2.29657433096 (0.99819610106341)	-0.863919125086 (0.744098441030025)	0.661167600162 (0.0653599429758087)	-0.501081099297 (0.447863338182954)	-0.0581359814062 (0.0296657505742549)	-0.307110298755 (0.957172487804227)	1.989995061 (0.79772731215269)	-0.589351892785 (0.850182831167846)	2.7767981832 (0.339781248802449)	0.0448565265779 (0.570799885471188)	-0.304190439 (0.999994471966)	-0.523159044719 (0.967024660919848)	-0.963829684441 (0.110355029771576)	-0.335036361159 (0.534368638522069)	0.321090356383 (0.671799092485737)	-0.626144759836 (0.509450693851268)	0.0513161151825 (0.635736627884371)	-0.968942100757 (0.423337389934281)	-0.573367151295 (0.777213411507661)	-0.63958235617 (0.465708352107806)	-0.461897221824 (0.770095040587463)	-0.381360181068 (0.999994471966)	0.381079146393 (0.207078849695323)	-0.361010089497 (0.698451811468247)
LINE/RTE-BovB.Sense	0.0342643474972 (0.999994471966)	0.0423925299813 (0.999994471966)	-0.0983106743607 (0.952587247776372)	1.03842422934 (0.320543130083654)	0.30182112931 (0.838064786018317)	-0.482256137527 (0.842836464097315)	0.843263162629 (0.865460738332428)	0.30653046295 (0.0881957103697425)	-0.907568602608 (0.43353248920941)	1.63188558668 (0.0833413996043372)	0.0815386880134 (0.471508728268227)	-0.422858601222 (0.382286860125219)	-0.534180877928 (0.989871864540448)	0.191373244113 (0.992741375480322)	0.577837770643 (0.665986950299993)	0.552329817104 (0.832581861187496)	-0.391201409019 (0.38578584260887)	0 (0)	0 (0)	0 (0)	-0.98573604493 (0.48274754210962)	11.5156503881 (0.0178707520961801)	-1.07807953948 (0.677140897087531)	0.639827475864 (0.671125201284657)	0.981895638473 (0.309031683224176)	4.90006900533 (0.56617055058548)	1.48787282044 (0.975269738475285)	5.29954000303 (0.466345512760501)	-1.27337041547 (0.241190645185941)	1.01037130082 (0.0820791327612963)	-0.0517043907215 (0.99819610106341)	-0.594134604615 (0.906004223487818)	-0.187500993616 (0.271735602253405)	0.165814424874 (0.946342924043839)	4.16426149755 (0.963618151088496)	-0.815175016228 (0.362207008222819)	-1.00660312144 (0.987250187515296)	3.79949046668 (0.81889355498821)	0.37611487624 (0.999436600206421)	3.88807361313 (0.443538826798411)	-1.39979223742 (0.298853224767684)	10.3606494587 (0.0546787536860184)	-1.1332416335 (0.176173401637888)	-0.855192932831 (0.884017467277221)	-0.694879263855 (0.811982827636702)	1.35045090336 (0.999994471966)	-0.940281761525 (0.334484010027661)	1.64991972492 (0.301453110060914)	-0.445376277738 (0.948212773530447)
LINE/RTE-X.Sense	-0.555019139152 (0.275684940119246)	-1.22658204783 (0.982120111086399)	-0.164128161358 (0.999994471966)	0.656964081757 (0.295088427761734)	-1.19702000121 (0.391435850883052)	-0.681165361048 (0.989637542296396)	-0.148227908726 (0.351518992370526)	0.025431679055 (0.482564403285403)	-2.10392372683 (0.176224622309186)	2.1891917565 (0.0268918751747911)	-1.88886990524 (0.446738242623747)	1.55659909285 (0.117335727672795)	-0.178111536451 (0.976016674016775)	6.22998443711 (0.0594186123796886)	-0.105989107078 (0.738883230495353)	3.8713088168 (0.149859175907039)	-0.589608972058 (0.767115694496798)	-0.188941487884 (0.863864018844128)	0 (0)	0 (0)	-2.07409776933 (0.00381774552401105)	20.2541226685 (0.00262024290955883)	-2.25049853442 (0.00152354049918047)	2.52244750592 (0.760617977777958)	-1.47503062824 (0.815159831012155)	0.991013688406 (0.712467048772167)	-1.831924423 (0.382470852293692)	4.12147840764 (0.050362879548634)	-2.13342537282 (0.00725166486462241)	4.27860127728 (0.0157825412595296)	-0.353054500353 (0.971132661757378)	0.903468139648 (0.918740356488626)	-1.98371049078 (0.0305308902339837)	4.08938902774 (0.632678166766059)	-0.733791283487 (0.602799239830687)	-2.1735170771 (0.0139647490731737)	-0.363091243129 (0.938431868042485)	0.0965525209033 (0.876033294410924)	0.344009870966 (0.175819386941098)	1.64187755784 (0.674645915487097)	-2.17290708776 (0.0576052305096227)	7.65892773435 (0.000774878863819473)	-1.43652290863 (0.263801369950219)	-0.0262054402145 (0.602021401337055)	-1.0325186399 (0.645916214888808)	3.15718884107 (0.13335567884402)	-0.690243027979 (0.938711674113565)	0.139124663296 (0.508914411323501)	-1.09017474167 (0.33632649481671)
LTR.Sense	0.141892131983 (0.703648175912044)	1.04066133713 (0.702934806393974)	-0.0967292827855 (0.960066306516443)	-0.192230625384 (0.930279245350588)	0.727691597707 (0.324816848263149)	0 (0)	0.268861610894 (0.905252885014156)	0.929645069722 (0.524905366884748)	-1.31496006272 (0.472979388214186)	2.5489650082 (0.339487589691601)	-2.0902628505 (0.28000480680719)	1.43024007899 (0.380296318689945)	1.43157711401 (0.349125883795481)	4.58810111996 (0.0150822669104205)	-0.655750610917 (0.0695193384453652)	2.20609114025 (0.429973622228819)	-0.689788142879 (0.698956394201095)	0 (0)	0 (0)	0 (0)	0.0515662237466 (0.635305692715024)	4.3960705887 (0.0265283517969713)	0.460095438214 (0.827822632335158)	0.566468184449 (0.742072665550319)	0.0426017330316 (0.473502934644611)	2.43716077849 (0.338476981808355)	-0.340496193729 (0.999994471966)	1.33791566225 (0.77062548512117)	-0.0243070960257 (0.94159461494677)	1.15595988649 (0.290657512977682)	-0.0988651524204 (0.957960007352008)	0.25394457183 (0.936712602284082)	-0.166897772917 (0.974855497444052)	0.893216975417 (0.081066639286618)	-0.762890779853 (0.922974886459472)	0.0381555392866 (0.999994471966)	0.135665115652 (0.950078591831327)	0.799258653067 (0.963485879193184)	-0.105846796079 (0.990272492412931)	2.96406420764 (0.025971833041225)	-0.702076047341 (0.522080975311528)	1.71788297321 (0.0122318459522582)	-1.49641333654 (0.313524411051942)	-0.442101864666 (0.963618151088496)	0.652599156875 (0.947558628122013)	3.54394518646 (0.999994471966)	-0.944635416505 (0.539925510288195)	2.50956560273 (0.0783353350315446)	-0.55641951394 (0.999994471966)
LTR/ERV1.Sense	-2.01329522317 (0.862773312952442)	-0.616235784793 (0.995730278470565)	-0.766460957171 (0.267753322956301)	2.14258731517 (0.193685597212552)	0.0579696416597 (0.49781155459923)	-0.479900197922 (0.990216060066799)	0.23911388232 (0.999436600206421)	1.31771875416 (0.959372849422087)	-2.79334006694 (0.019792577615836)	2.17109939437 (0.0544430893791651)	-1.26838642857 (0.169010554079092)	-1.53761771574 (0.7694462249557)	-0.236063262679 (0.414193785621943)	3.03041963784 (0.00119502291996077)	-1.24719529101 (0.0305572766422702)	2.40225123607 (0.161011724896759)	-0.49842632209 (0.358518293154939)	1.64372354963 (0.245806955068984)	-0.528717160662 (0.37422220825944)	0 (0)	-0.417691148948 (0.0929748751890775)	3.28282312347 (0.000904365240480842)	-0.892312706896 (0.213664648417023)	-0.191159311885 (0.963462647120324)	-1.51802417317 (0.512557495037815)	3.85448883739 (0.39106800295341)	-1.83513127804 (0.0245739283641201)	1.5557878811 (0.173867040361527)	-0.735695590782 (0.350184462061285)	1.99800364729 (0.040944893466699)	0.112209228886 (0.844133315023668)	-0.374172920813 (0.960330172000353)	-1.5409371526 (0.000588725792794775)	2.64471758033 (0.230535288995006)	0.950675319249 (0.947558628122013)	-0.761709174103 (0.379637952700337)	-1.19516551027 (0.347642487118572)	0.93082974314 (0.687766761802624)	-1.47182017639 (0.551137080275764)	3.69408586965 (0.246628862543597)	-1.96521230537 (0.0104812621839298)	4.04104748529 (0.00122997110729143)	-1.28805663161 (0.136363190482348)	0.755002518719 (0.999994471966)	-1.52682602309 (0.170263712552043)	3.84125029848 (0.00710550598481463)	-0.968832972219 (0.574756800978146)	3.75922148964 (0.00293079738682952)	-2.3092479071 (0.588948657576613)
LTR/ERV1?.Sense	0.696247345041 (0.947558628122013)	-0.982365937169 (0.27189674771195)	1.68191384843 (0.485319777834462)	-0.825379082502 (0.167911201085364)	0.64691204987 (0.999994471966)	0 (0)	-0.559383504808 (0.86812080622707)	0.112953704075 (0.972726646688945)	0.159362677452 (0.958838993362852)	-0.800514236473 (0.832581861187496)	-1.22455999564 (0.216935344080315)	-0.411379070477 (0.980893980105088)	-0.431585109226 (0.982120111086399)	0 (0)	-0.360628747762 (0.580661351030011)	-0.680600242912 (0.97706811460324)	0 (0)	0 (0)	0 (0)	0 (0)	0.0407528918331 (0.707117819056789)	0 (0)	-0.123523416632 (0.722409761702201)	0.20630026189 (0.591705408031347)	-0.826565513281 (0.808523147070433)	-1.21619052917 (0.368843870066364)	1.01886482146 (0.785508785694495)	0 (0)	0.258123513662 (0.969936713460053)	0.211014856807 (0.302625533086389)	0.202188692105 (0.684988279705434)	0.177168499461 (0.736837513632086)	-0.55699952957 (0.999436600206421)	-0.62262857715 (0.999234922632642)	-0.47168456977 (0.971132661757378)	-0.64238198756 (0.578587791160585)	-0.341650278266 (0.481281205930807)	-0.754052380012 (0.20076243020944)	-0.0466759202526 (0.712467048772167)	3.12840654264 (0.221349347796413)	0.0915179944155 (0.955713966508497)	0 (0)	0.458890022412 (0.826281571831116)	-0.530204146174 (0.842701844387994)	-0.597822316341 (0.982149441777951)	0 (0)	-0.526185029309 (0.999436600206421)	0.365574741066 (0.369667141995136)	-0.412604469937 (0.974352598912932)
LTR/ERVK.Sense	-0.647817229372 (0.255730444870257)	1.29173808377 (0.645330855981672)	-0.955172486258 (0.742072665550319)	4.73384947331 (0.194526707806672)	-1.21148789914 (0.0605497356990382)	-0.911650543091 (0.138893113298679)	0.684175697614 (0.818637941648965)	-0.447352439246 (0.963335908820474)	-0.606150417713 (0.875525078586688)	1.16254940146 (0.503825629747523)	1.63646833947 (0.227334349720893)	0.649719679671 (0.113535238864457)	-0.475552867731 (0.999436600206421)	2.8475168265 (0.292018133747747)	-1.0813144891 (0.201675359065926)	0.863191919161 (0.998142347603678)	0 (0)	0 (0)	0 (0)	0 (0)	-0.919016970483 (0.0328747210241557)	4.02216551714 (0.454573268898486)	-0.960019449312 (0.0618560559714766)	-0.310938814119 (0.856898582455606)	-0.562784216973 (0.959742746512144)	3.23926398322 (0.645191720896606)	-1.4084727441 (0.245930878170724)	-1.24916712492 (0.829465762217259)	-1.1272367697 (0.0870439556641944)	2.19740448131 (0.114408333525196)	-0.361903265543 (0.770677208826311)	0.363560357543 (0.999436600206421)	-1.10275932189 (0.515996684388004)	1.62249989201 (0.196923076923077)	-0.723787706414 (0.953665836363919)	-0.546513051903 (0.608105436999417)	-0.247826382081 (0.919334394750579)	2.24034035534 (0.699520708958225)	-0.643584010075 (0.883174240079773)	-0.878959502563 (0.747372187403564)	-1.46077735538 (0.0276858966376436)	8.63873356146 (0.190915469342338)	0.682135528276 (0.999994471966)	-1.14166636959 (0.971132661757378)	-0.523946394263 (0.750167893707467)	8.91855595448 (0.0399006085780544)	-0.0988184192996 (0.404154385274395)	2.64288837726 (0.222704603048617)	-0.605232779993 (0.973211209103701)
LTR/ERVL.Sense	-1.25197209407 (0.554541415532204)	-1.16927104326 (0.861603908777087)	0.0865733452001 (0.233218963860478)	4.27260364149 (0.0909989165482439)	-1.30502066797 (0.0340533360079973)	0.562674630246 (0.35840228097897)	-1.02891137688 (0.967024660919848)	2.13750580072 (0.00173347111353835)	-2.71391857261 (0.10131261159594)	2.18045379485 (0.000752164634793301)	0.590236431824 (0.999436600206421)	-0.259283036314 (0.454440640414175)	0.598568508849 (0.999436600206421)	-0.117485310975 (0.848841650076719)	-2.05763194785 (0.0356276671090945)	3.14839696742 (0.00339417567538611)	-0.68717829045 (0.48383334779479)	1.78898838343 (0.00288673463339944)	0 (0)	0 (0)	-0.925296667914 (0.0690345942657774)	6.69555346228 (5.0526576949317e-05)	-0.352601865623 (0.0163160025361261)	2.4031712553 (0.982120111086399)	-1.37903573089 (0.645072403777801)	5.02578938855 (0.277864718440197)	-2.44736148656 (0.0700887581165349)	3.43085904862 (0.0029644499626833)	-0.781975993377 (0.0467400556951579)	3.87217165374 (1.42462906118667e-05)	-1.22786618322 (0.0527237135145621)	0.572255902379 (0.300235999473238)	-2.20001018286 (0.000164263659879992)	2.99810327592 (0.385084783465298)	0.927395124923 (0.833741424104686)	-2.00687936977 (0.0198170050341176)	-2.00964447638 (0.319640039972761)	0.878313173903 (0.401910266511001)	-0.0826616037419 (0.999994471966)	0.640062547968 (0.287303319693663)	-2.12546302581 (0.00085504056506462)	6.53414850036 (2.18003665560079e-06)	-2.38261985975 (0.120612037961296)	0.0156506154086 (0.686402027073925)	-0.821175381906 (0.010393984881352)	3.36685250624 (0.00932760849600046)	0.0490517178033 (0.195829675869466)	1.52244456715 (0.475930998929215)	-1.47278710805 (0.458908771336287)
LTR/ERVL-MaLR.Sense	-0.66544429489 (0.582525297559635)	1.80160500666 (0.0423109313928865)	-0.924687151388 (0.222589190652001)	4.25936744398 (0.322277433588097)	-0.792190758956 (0.815571674221714)	-0.568783517182 (0.982120111086399)	0.943265510468 (0.484908732722583)	1.27220639282 (0.254972883866822)	-1.59862584473 (0.348678635626636)	-2.14847759649 (0.757288460351862)	-0.302615186403 (0.810991113060861)	-3.31118985812 (0.0190226806604577)	0.140808020507 (0.745775058986704)	4.10552117913 (0.177331286798877)	-0.638404195745 (0.540778388269092)	1.75503512271 (0.166031570570926)	0.720190661243 (0.536383224188135)	3.48753009784 (0.370999210772525)	-0.593477128102 (0.784786019823723)	-0.661972828764 (0.678973687609596)	-0.871415367363 (0.342031625078029)	3.62685852139 (0.0312021658590151)	-1.30423020346 (0.126803564051547)	-0.851964764974 (0.999436600206421)	-4.21588463263 (9.39575914700163e-07)	0.455701466983 (0.99819610106341)	-1.97015750833 (0.000310108182797073)	2.51885513412 (0.43692830942036)	-1.68531089879 (0.900982580362051)	2.13663252435 (0.669197971470483)	-0.630663339879 (0.984357942469367)	2.22868887189 (0.0485910019058094)	-4.05917711352 (9.96230983350403e-09)	1.86649972608 (0.459579269574311)	-0.528570103522 (0.208143059274596)	-1.6201460436 (0.00153196010213291)	-0.933158614474 (0.80646895632606)	3.38374111025 (0.0123532914134713)	-0.721691116822 (0.838220693586377)	1.03212129299 (0.354542755492507)	-2.66288431485 (0.00178402047050067)	6.11651621572 (0.081849582007895)	-0.863686297264 (0.56708961110354)	-1.21019435822 (0.106210250905064)	-2.17216099913 (0.0038745986896006)	5.87371340259 (0.0237295153160323)	-1.70943121496 (0.0788080447171666)	3.95013678004 (0.253742102525042)	-0.668637558437 (0.133260281177552)
LTR/ERVL?.Sense	0.89133028061 (0.327340646827657)	0.126467029787 (0.665617541671981)	0.587658800087 (0.603090935413942)	1.31478627693 (0.83136441551654)	2.32993132046 (0.832581861187496)	-0.34270976568 (0.999436600206421)	3.28632900616 (0.424162881876458)	-0.397937076873 (0.768510662902553)	1.96876246205 (0.980893980105088)	0.27830608657 (0.620032316493925)	-0.201309543363 (0.999994471966)	0.119408270775 (0.799936154306797)	2.91660874786 (0.87452658556203)	0.64736699028 (0.426045350531055)	1.82053687572 (0.999994471966)	-0.457773858091 (0.899414119264444)	0 (0)	0 (0)	0 (0)	0 (0)	-0.373527092231 (0.768170172125945)	-0.168341023564 (0.999994471966)	-0.527851219685 (0.757783390538631)	-0.417072755394 (0.877946253401198)	-1.16712737936 (0.86105750129487)	-0.926278668861 (0.999994471966)	-1.09155572854 (0.576468638016287)	-0.947595419426 (0.999994471966)	0.888809609142 (0.244104869768464)	0.117166589156 (0.686781089629204)	-0.193985148691 (0.999994471966)	-0.2616790122 (0.832581861187496)	-0.652995422794 (0.85170295289711)	0.158300141828 (0.050290346137024)	-0.5197178481 (0.538996810669759)	-0.317600563348 (0.652436182144225)	-0.278852401659 (0.561180777628312)	0.143509590987 (0.982120111086399)	0.554262133333 (0.445919885528037)	1.12255399382 (0.770312755050944)	-1.24414470515 (0.300051174316836)	10.0547129066 (0.0467728723927595)	-1.37660582315 (0.494359111025973)	0.562767471609 (0.832581861187496)	-0.924955221766 (0.53525007164102)	4.2783438553 (0.184669784887952)	-1.33339763684 (0.328648885316117)	3.14789321776 (0.363822189419324)	0.181985896384 (0.959477498067946)
LTR/Gypsy.Sense	-1.13690338544 (0.860688662514264)	0.962306280952 (0.895802820626198)	-0.819827831306 (0.926262047061887)	-0.0113559524122 (0.999994471966)	0.513735775943 (0.513963884369901)	-0.512780924564 (0.844533675564688)	0.0559596813079 (0.896925549772384)	1.37280124936 (0.286920686630287)	-0.965001268823 (0.0510298295766863)	-0.00624341885123 (0.281971099141764)	-1.27226429557 (0.559112288878797)	0.443885152482 (0.0266161970413844)	-0.46091703504 (0.947558628122013)	-0.137186009063 (0.202965413005005)	0.583865290995 (0.439408936721526)	-1.01144415993 (0.740124481407284)	0 (0)	0 (0)	0 (0)	0 (0)	-0.277174228841 (0.97789098072497)	-0.400987180098 (0.818451701302252)	-0.605828043904 (0.781555804406294)	1.86715551159 (0.163365542362049)	-0.750511563028 (0.999994471966)	-0.674500980567 (0.386742410588931)	0.232263080763 (0.792507071963821)	4.43523462995 (0.645916214888808)	-0.151396020674 (0.468937755742106)	-0.407195084118 (0.983619204820796)	0.483865171677 (0.751609415210749)	-0.600907261267 (0.329000166363562)	-0.558873612973 (0.773441545023778)	3.94288211236 (0.846606520679673)	-0.985903611304 (0.116687809434236)	-0.730932797605 (0.250992655355376)	0.106535090347 (0.978870101895072)	-0.563640472242 (0.82285679518637)	-0.548591020266 (0.78931419312296)	-0.272267111604 (0.999994471966)	-0.0661941689076 (0.999436600206421)	-0.339335098153 (0.809859107345965)	0.120136626666 (0.519943998163206)	-1.10536757985 (0.984440915086222)	-0.762771272239 (0.805230220515908)	-1.4487848653 (0.726708456243854)	-1.0023434124 (0.267154251177653)	0.00822887074923 (0.988837567560701)	-1.63743841471 (0.248247768223649)
LTR/Gypsy?.Sense	-0.63060476165 (0.828449951738761)	-0.359387210603 (0.753849531402982)	-0.57720614866 (0.832581861187496)	2.0080961643 (0.638021458341899)	-0.202028350257 (0.802806370834886)	0 (0)	-0.345045822007 (0.966581609968563)	0.16348605388 (0.165088394361797)	-0.981391295019 (0.374428878351833)	-0.196791268125 (0.473688501679998)	-0.986200802096 (0.664935759240972)	-0.319721011885 (0.546877557828002)	2.43379588828 (0.982120111086399)	0 (0)	-0.237249827037 (0.956814001252997)	-1.15619194376 (0.365943737610355)	0 (0)	0 (0)	0 (0)	0 (0)	0.43099110142 (0.999994471966)	0 (0)	0.603973801012 (0.999994471966)	-0.370667938384 (0.823767438194607)	-0.561755848887 (0.484556886888738)	-1.40397733418 (0.558673250433332)	-0.795462657452 (0.98492257848321)	0.511444397581 (0.409195777213431)	-0.560493030717 (0.733705704369962)	-0.272819050853 (0.818451701302252)	-0.697147531172 (0.803188568540276)	-0.644103542324 (0.613371214238688)	1.23101593369 (0.960066306516443)	-0.229135464512 (0.844833189874954)	3.64410925437 (0.134452711574485)	0.19955038359 (0.441415050201381)	-0.122085273399 (0.860688662514264)	0.417908650357 (0.856105467093758)	-0.99808130377 (0.423337389934281)	1.63817711742 (0.164455464739057)	1.95860231153 (0.44508368246784)	0 (0)	3.69394090454 (0.822043290326419)	0.163122128596 (0.991731135613448)	-0.356984172378 (0.846606520679673)	0.842044489196 (0.5898382991102)	0.344268432906 (0.778915406820996)	3.64414597806 (0.0298836992626608)	1.44639060384 (0.152833151941269)
LTR?.Sense	-0.413728443778 (0.838620676557045)	-1.85148946245 (0.0467089045986597)	-0.715003777676 (0.620705283306404)	-0.535459601663 (0.975864662391758)	-1.24969601443 (0.104776370860972)	2.76753976144 (0.352860960456003)	-1.20800418169 (0.869336047050222)	3.3462080026 (0.121118791763013)	-1.22281096953 (0.738067897329653)	0.64421203756 (0.03673046783232)	-1.43831741379 (0.461474945148258)	0.103761598972 (0.830824653550786)	-0.678531916015 (0.982309074246521)	0.0347837909767 (0.587557943645749)	0.291746184095 (0.273561077475652)	-1.02807710221 (0.887684649381477)	-0.559649663719 (0.0992887129607036)	0 (0)	0 (0)	0 (0)	-1.05506830082 (0.313638507584948)	3.21261852544 (0.196790919309947)	-1.07982386033 (0.272546873911525)	-0.303381800809 (0.604247376756516)	-1.05624467675 (0.675393750074778)	0.565723106715 (0.989082275006342)	-0.950447133004 (0.482345853705137)	1.5099926285 (0.191726991393729)	-0.36926628872 (0.0680500600511675)	2.76643799959 (0.00011971407730159)	-0.477128867283 (0.431948426735475)	-0.665346633426 (0.999994471966)	-0.888672940768 (0.494338823111128)	-0.395546476388 (0.746253014212799)	-1.30691125312 (0.433864297107938)	-0.0895699406627 (0.999436600206421)	-1.30634183581 (0.454666753828317)	0.394243196976 (0.687766761802624)	0.0992905699121 (0.999436600206421)	0.427857760418 (0.0473592706193732)	-1.03236990324 (0.436074178023677)	4.77272319203 (0.0814387200751411)	0.00547942575577 (0.837367765473251)	0.594068798448 (0.86702974833247)	-0.59529121194 (0.99852019281161)	0.214491390248 (0.228769308812381)	-0.0842959997445 (0.169334291361441)	-0.231659532229 (0.192353042457114)	-0.371774229668 (0.955322767535152)
Low_complexity.Sense	-0.865425386999 (0.947558628122013)	0.937713841491 (0.17569618514125)	-0.82070654753 (0.853369061228426)	1.56843097406 (0.774695332874944)	-0.347503040595 (0.102860070163819)	-0.3717381694 (0.955322767535152)	-0.568447769681 (0.165063273076058)	-1.10359218446 (0.711673263814963)	0.25908888819 (0.00341103870361823)	-0.592222928761 (0.996379988450613)	2.96939257098 (2.92624059679451e-06)	-1.01989887061 (0.32977760683123)	-0.368741100527 (0.681340318297474)	1.92390050176 (0.00743962305320002)	-1.03809587501 (0.368865292070087)	2.91643778684 (0.0178111070676452)	-0.359310226355 (0.332482171269008)	-0.318004679461 (0.538260686914165)	-0.279111795655 (0.484947443616696)	0.346624055548 (0.328591822961632)	-0.140820627326 (0.456031207250292)	9.50598806556 (6.56247012011681e-07)	-0.786896933776 (0.99743709545596)	2.97579572681 (0.00445299027142839)	-2.45414994318 (3.50239291095633e-06)	2.57600404989 (0.00535664151170669)	-2.23439750061 (3.4129715348218e-05)	2.76727916472 (6.18510827613515e-05)	-0.829559776364 (0.709535083923039)	4.13337984361 (0.137366864146795)	-1.13706549825 (0.377126936005673)	1.13157536475 (0.913814702035384)	-1.66538989581 (0.00147882517842412)	6.79778994871 (0.000221367681118077)	3.63998704811 (0.00549585109229166)	-1.35668779069 (0.00577130007180509)	-2.15592447738 (9.56856632977107e-08)	6.72633414647 (0.00134553159733888)	-1.38125936831 (0.0217527315113463)	3.62422487528 (1.52690234816111e-06)	-1.5839049925 (1.0140891637449e-10)	11.0790912068 (4.3790072754519e-11)	3.04533523402 (0.0196533175246201)	1.19323316767 (0.990216060066799)	-1.82166703418 (4.70889242848885e-07)	10.3989840218 (2.94135636070795e-06)	-1.75018458357 (0.00277152123732649)	3.18756553611 (1.21616473355533e-05)	1.54319221734 (0.00300537458332568)
RC/Helitron.Sense	0.306003418509 (0.667558699771595)	0.032734144543 (0.420349256046949)	-0.645657618977 (0.515989928520052)	-0.153387142892 (0.671333049542397)	-0.20889608897 (0.518576776806097)	-0.683939321999 (0.842066791539293)	0.0508968200754 (0.771761521303762)	-0.234126222608 (0.949716649355987)	0.518438088159 (0.194849475418297)	2.2158771351 (0.285182606494937)	0.0128264892284 (0.976528728677271)	0.125951121038 (0.553201600851142)	-0.522501889582 (0.816170277002038)	-0.544650953177 (0.740169705755896)	-0.591453061996 (0.592880521447124)	-1.01992328706 (0.853369061228426)	0 (0)	0 (0)	0 (0)	0 (0)	-0.292766240941 (0.797824911965706)	0 (0)	0.00371015310281 (0.235328834827564)	-0.0266237393326 (0.955403409744013)	0.0455077431939 (0.7788321982307)	-1.53709838522 (0.754336702762257)	-0.859410360806 (0.846780177300508)	0.298158690828 (0.856074617149402)	0.369502207117 (0.999994471966)	0.725761353124 (0.986313599902971)	1.95006844487 (0.598186389214558)	1.81855531259 (0.795131526884599)	-0.44464897312 (0.978870101895072)	-0.154739888504 (0.821425579136288)	0.980257445251 (0.520800748029737)	0.14429604063 (0.952822880890816)	-0.492572005308 (0.997836950932238)	-0.468849776437 (0.987250187515296)	0.187447012494 (0.984357942469367)	0 (0)	-0.622708931606 (0.876481139119533)	0 (0)	-1.03538370463 (0.72094035900724)	-0.0927700891084 (0.798475628939402)	-0.168710734863 (0.495550406110353)	0.19503773911 (0.818637941648965)	-0.11743263687 (0.493618746987183)	-0.655026259343 (0.999994471966)	-0.854594980058 (0.789291331219703)
RC?/Helitron?.Sense	2.23281511492 (0.982120111086399)	-0.841379933595 (0.999436600206421)	-0.769267164815 (0.999436600206421)	-1.41686442151 (0.700474569420282)	-0.48265106165 (0.81889355498821)	0 (0)	-0.592688588381 (0.999994471966)	0.0119120785601 (0.388961464518256)	0.766164504248 (0.189215196237989)	-0.096291843265 (0.849316600843361)	-0.763645626998 (0.237745963844069)	-1.76376493045 (0.192353042457114)	0.28847115562 (0.299871218559935)	-0.157667739926 (0.962622535540401)	-0.23721205581 (0.999994471966)	-0.682702782952 (0.830366158394859)	0 (0)	0 (0)	0 (0)	0 (0)	-0.657592521368 (0.27342917677997)	0.455161464893 (0.492974610187654)	-0.846540736259 (0.286838599665197)	-0.996275148676 (0.537583392519971)	-0.374035299115 (0.707929063346453)	-0.41395790145 (0.747372187403564)	-0.811742564961 (0.76036705767795)	0.322752168045 (0.119772655428979)	-0.139916900242 (0.999994471966)	-1.18044652814 (0.971132661757378)	0.100701144435 (0.832581861187496)	-0.913718535772 (0.956814001252997)	-0.115312460637 (0.368843870066364)	0.604047448379 (0.951830961842781)	-0.233783081882 (0.971132661757378)	0.0371719891274 (0.490949283673542)	0.484904156496 (0.540649795765787)	1.3885755861 (0.69089200500577)	-0.75273780398 (0.846296843686952)	-0.984578091043 (0.817933013543168)	0.0258621273959 (0.663180076000929)	0.00321756130422 (0.806564969679264)	0.359392079479 (0.567527332066812)	-0.190760541424 (0.408375338449117)	-0.500471385324 (0.986672692055482)	0.930662152482 (0.144243632408972)	0.773422632288 (0.979994872495635)	-0.251596959082 (0.675393750074778)	0.189753431352 (0.695488969297388)
RNA.Sense	-0.0992596662509 (0.303558183062296)	-0.0351141437049 (0.33327989965766)	-0.0180060279956 (0.654219488147519)	-0.475312823272 (0.999436600206421)	-0.367872248426 (0.733604367456963)	0 (0)	-0.833330452388 (0.182839865295563)	-0.288839439091 (0.58151037964016)	-0.183506491216 (0.999436600206421)	-0.300723147989 (0.679996440464711)	-0.524384380193 (0.776401326655373)	0.0241773957965 (0.440989531742803)	-0.214879568987 (0.999994471966)	-0.21505177103 (0.974352598912932)	-0.585560078417 (0.22719133408997)	-0.121203766329 (0.612897313247235)	0 (0)	0 (0)	0 (0)	0 (0)	-0.155075640404 (0.962517091672034)	0 (0)	-0.252885791206 (0.995487677872094)	-0.370189966129 (0.999994471966)	-0.294327662637 (0.629217010497002)	-0.312648281343 (0.729469835298033)	-0.760782464854 (0.703648175912044)	0.69841115756 (0.349125883795481)	-0.679871772205 (0.371067069943255)	-0.354194309497 (0.999436600206421)	-0.392482492906 (0.919450544804009)	-0.70346316729 (0.753403736098677)	-0.368310247924 (0.910257439474052)	-0.361170948071 (0.999994471966)	-0.573114168403 (0.578342481403566)	0.182414233754 (0.472472186096813)	-0.188526687773 (0.508914411323501)	-0.602199848432 (0.834137310230026)	4.4717641222 (0.45117533599114)	-1.18654934348 (0.25049963528082)	-0.326624093111 (0.817511029750156)	0.0193891584162 (0.818451701302252)	-0.292046543434 (0.950055437204396)	-0.0292167911801 (0.379622305732667)	-0.359451717347 (0.979465201701935)	1.8188096559 (0.0487630535807848)	-0.44330255189 (0.81620381115902)	0.263980501044 (0.785794362755767)	1.57082918899 (0.0876404273598533)
Retroposon/SVA.Sense	-1.32872224278 (0.200349589926866)	0.725652930724 (0.477076244994687)	-0.863030375648 (0.0927003037970331)	0.163424074086 (0.322449208630333)	-0.420892234007 (0.971482848020983)	0.00751148517901 (0.611816695732986)	-1.00287928053 (0.579285234299631)	0.351387542186 (0.106656351727801)	-0.991761757149 (0.564137974784723)	0.938982152907 (0.485753381308509)	-0.106483129021 (0.674724780452917)	0.0662390638505 (0.510255097604813)	-0.891649785323 (0.60804999476806)	3.84155802034 (0.56177053683328)	-1.13780767691 (0.160775219347978)	-0.941755446824 (0.632932664739308)	-0.277452743377 (0.954854858883501)	0.128695358306 (0.326590203874788)	0 (0)	0 (0)	-0.608065198657 (0.500764981155143)	0.0557881996826 (0.0992578617337851)	-0.496615079982 (0.820080469587993)	-1.72507689989 (0.562751008431573)	-1.19701947827 (0.309881248134772)	2.95030447767 (0.314005053285209)	-1.5588517115 (0.341914530561042)	3.18469171944 (0.228975209294948)	-0.693378926426 (0.0832471996120231)	1.12212827449 (0.630139797598352)	-0.820922177235 (0.71191597627219)	0.402535076437 (0.742072665550319)	-1.45627029972 (0.248846052321064)	1.53450029756 (0.570470056649313)	-0.695588651676 (0.999994471966)	-1.02634993562 (0.558847790283521)	-0.615541400448 (0.885126823258778)	0.441477411737 (0.387763693444162)	-0.621349366326 (0.442657984319053)	-0.147557205852 (0.834479887922309)	-0.894429428051 (0.667194986051456)	-0.739833313727 (0.0841534170662192)	-1.06401340325 (0.436985392112097)	-1.16815314294 (0.749731650319473)	-1.07882128506 (0.246156694510424)	0.363974139371 (0.415226696655593)	-0.0728598312531 (0.681581854584486)	0.156616152492 (0.352285249836213)	-0.53695190641 (0.508034167935834)
SINE/5S-Deu-L2.Sense	1.07019224265 (0.645916214888808)	-1.04152305253 (0.952848181820054)	-0.356041112528 (0.67912348939141)	2.49931904457 (0.0604099556562217)	-0.423048702572 (0.419605471800071)	-0.0166451649184 (0.694518430104444)	-0.780514079455 (0.707929063346453)	1.65008519539 (0.0141529623696835)	-0.609021961553 (0.651869608978218)	0.5405305799 (0.013357817315676)	0.164389545408 (0.52639232775727)	0.416362837786 (0.302993246264774)	0.0814394642881 (0.999436600206421)	6.06088678454 (0.145030235031934)	-1.1914139455 (0.170491139314724)	2.38242553665 (0.653966345169172)	-0.403852531377 (0.422157666797516)	0 (0)	0 (0)	0 (0)	-0.597672770686 (0.340692367681864)	1.95570431587 (0.716306140026715)	-0.959284485743 (0.0534609968610224)	-0.00723641658934 (0.999994471966)	1.13146338884 (0.45721075478858)	2.20286614424 (0.146001881037972)	0.0582831352456 (0.661296658978744)	1.87264311836 (0.0209511617252882)	-0.899397707638 (0.254972883866822)	-0.965590295599 (0.955322767535152)	-1.3412729343 (0.385614035104564)	-0.612288406868 (0.228120044202238)	-1.34657059328 (0.0551962184968663)	-1.41364840493 (0.541099775958534)	-1.30181311946 (0.277928637170463)	-0.694293582232 (0.65632782776514)	-0.957447709996 (0.973422230304496)	0.320749101299 (0.544619197226708)	-0.50658120239 (0.81874750730019)	3.01157370108 (0.359938076257364)	-1.54470590221 (0.00432772567433856)	0.525618037191 (0.2204456702976)	-1.57316080479 (0.0630862658248382)	-0.882529553911 (0.803463580665892)	-0.868517353753 (0.971707398388617)	6.18764183974 (0.0618576879053796)	-0.400296532426 (0.644451402534145)	0.793839642325 (0.202390627905363)	-0.493568387534 (0.637835913863039)
SINE/Alu.Sense	0.595830001304 (0.465708352107806)	-1.18989049147 (0.405859628034004)	-1.97649040207 (0.42059272303731)	3.75950958784 (0.00123868593703861)	-5.38936808227 (2.61163245020485e-09)	0.766000719307 (0.680880625985331)	-4.43872419183 (1.19669945133261e-05)	0.88772283386 (0.522514002100792)	-2.14076389193 (0.00330402139589519)	4.62694344065 (7.81623360319561e-07)	2.71703963926 (0.144637427343025)	2.45870297634 (4.29381819728432e-06)	-3.95773113971 (0.00774933219745792)	7.28693296515 (2.74731529316044e-05)	-2.61160872209 (0.164455464739057)	3.80042935845 (0.0679352778978689)	-1.63300145304 (0.271782890930941)	0.41633143311 (0.890685030991065)	1.03241975575 (0.169159561843566)	0.454517836531 (0.449947261739997)	-7.85942157409 (0)	12.4011005149 (1.35617226726997e-14)	-6.95948305278 (2.34815602491667e-12)	2.31320175857 (0.0853265602764414)	-3.03028022258 (0.0249203253624334)	10.3198403233 (2.72004879992125e-11)	-4.58416812693 (0.00687977148820645)	10.3916306479 (1.51095150316299e-12)	-8.96821036095 (0)	8.49119165033 (9.774457741627e-10)	-5.10081614101 (6.87376295875737e-06)	0.466535473995 (0.707240854929184)	-2.6415776861 (0.120155329191201)	9.89680335285 (9.44067454009621e-10)	6.29130094785 (0.000827914212137622)	-1.402504697 (0.495442317194884)	-1.13930227029 (0.423172138389112)	5.56161086549 (0.00325683948032906)	0.624715821353 (0.462641299009468)	0.73888710864 (0.798912309226168)	-5.8546525585 (2.13331835601735e-07)	15.5823317013 (0)	6.34833825974 (4.63248535730844e-05)	5.61829946561 (0.000149003306121888)	-4.38075938958 (0.00198036970642784)	10.0241941073 (7.3415476028801e-13)	-2.70520934072 (0.164486795434282)	5.47645286274 (0.0125531961264908)	2.49330688225 (0.0047520466696572)
SINE/MIR.Sense	-1.02066600911 (0.999436600206421)	4.79365029218 (2.64998837032421e-05)	1.55170563564 (0.516482161565166)	0.785317775002 (0.845848138227257)	2.78851605244 (4.31252733366389e-07)	-1.00553551047 (0.835946329245829)	2.81789214555 (9.07161543399452e-07)	-0.177375697005 (0.999994471966)	2.07904290669 (0.00605951431902779)	-2.01806350646 (0.00557721888701184)	4.86430546923 (2.18457481421123e-05)	-5.33202000144 (1.13563509597354e-09)	-0.264303715359 (0.497294545332123)	4.52560923938 (0.0721317815126539)	-1.97631798554 (0.861605383329561)	4.89651789352 (0.00066549205689733)	-0.996943068911 (0.673697719136166)	0.0593925546148 (0.667192867783581)	1.89439876381 (0.356126613804105)	0.673492596314 (0.808064585644446)	1.42802276731 (8.09168891081527e-06)	12.1991736587 (5.45963187881861e-12)	0.553267815132 (0.0687771568295532)	8.6213222619 (3.28347146366073e-12)	-7.46755824821 (5.29444117909534e-14)	8.88534124003 (7.13426559897984e-07)	-3.64396502057 (5.19981683382145e-05)	5.09766466044 (0.0020418355950555)	1.9150755393 (1.31066413862449e-09)	2.74190514433 (0.7687625165351)	2.33425552517 (0.000105142210178599)	0.0126683244313 (0.578587791160585)	-3.50368693017 (0.00308530425316549)	4.34865772246 (0.273342874996765)	4.28726487387 (0.000631355607348593)	-5.33106056217 (1.48758444071027e-08)	-9.20197177293 (0)	8.42911684701 (4.21576058013508e-10)	-5.44495121384 (8.26602787236566e-06)	8.36089916767 (0)	-6.77333953729 (0)	15.0782282185 (0)	6.19196984635 (0.0154732116159556)	2.0281560266 (0.371126722618885)	-8.19347224976 (0)	10.4017835504 (3.22217697981597e-12)	-6.69109065592 (6.96387609884612e-13)	8.82713669404 (1.04520347364361e-13)	-0.149613234493 (0.324335921928138)
SINE/tRNA.Sense	-0.0854299589064 (0.963618151088496)	-0.730387649622 (0.824678716515234)	1.19337235021 (0.999994471966)	2.00392983611 (0.489764676163767)	-0.789080439137 (0.524129586796977)	0 (0)	-0.630917504947 (0.980893980105088)	2.74122061029 (0.166856602134929)	-0.456907673146 (0.289158732920309)	-0.116366289714 (0.999423580225692)	0.556652154795 (0.841966304269638)	0.572880542444 (0.615401843420776)	0.328201094584 (0.5659371863277)	0.643635892321 (0.957866425602599)	-0.42482444506 (0.811982827636702)	0.145035002544 (0.946744264526877)	0 (0)	0.472545107604 (0.403014979487053)	0 (0)	0 (0)	-0.511930324234 (0.999994471966)	0.546812139053 (0.330963744292332)	-0.311403198504 (0.960066306516443)	-0.3373182741 (0.965701339203826)	-0.560577645546 (0.999994471966)	-0.517850481457 (0.839378464573117)	-0.897157913757 (0.949489302704115)	-0.319013727338 (0.801779651376768)	-0.887857896378 (0.186721952091593)	2.8523507027 (0.0141529623696835)	-0.00708451146711 (0.596606098472598)	2.10106398142 (0.539628065279703)	-0.317351617698 (0.971132661757378)	-0.281498137326 (0.488936691541316)	-0.883803141307 (0.213877240939406)	-0.296271872134 (0.663835880969504)	0.375752938172 (0.533747351547431)	-0.346445606594 (0.979994872495635)	-0.123172851362 (0.984176878751582)	1.18899115275 (0.962320897606369)	-0.534108807472 (0.116246535672708)	4.25209283304 (0.214226545022201)	-1.04457656358 (0.397206352142733)	-0.198031509393 (0.999994471966)	-0.495566759303 (0.967209212319685)	0.633712344499 (0.77550293190702)	-0.535703142337 (0.885126823258778)	0.74545971289 (0.732133736676243)	1.36837119308 (0.279848246448909)
SINE/tRNA-Deu.Sense	0.926667262843 (0.488208165678155)	-1.01867717516 (0.180892609456747)	1.64769027501 (0.77622374523198)	-0.142929461269 (0.999436600206421)	7.11746044099 (0.155802114971197)	0 (0)	1.57934536982 (0.99819610106341)	-0.129938813371 (0.0499536093132739)	-0.410549652687 (0.856074617149402)	-0.252594500661 (0.975591463829521)	-0.370973709151 (0.740124481407284)	-0.327047085932 (0.992429271193414)	-0.200110604811 (0.581427166911513)	0.335003090653 (0.338037544672933)	-0.337193575155 (0.753231669026053)	0.55611940078 (0.341765754261788)	0 (0)	0 (0)	0 (0)	0 (0)	-0.387992283521 (0.873707066464716)	1.96958758159 (0.798475628939402)	-0.523783680453 (0.977918163315086)	0.88602225928 (0.674724780452917)	-0.826648051696 (0.679007963190961)	3.39687038785 (0.259024395483194)	-0.70373249856 (0.973211209103701)	1.0025673648 (0.999994471966)	-0.428243175931 (0.7891408494597)	-0.258435524226 (0.699866269472776)	-0.537688000014 (0.971132661757378)	-0.0701619716695 (0.76880051824958)	-0.383193472222 (0.550371814190013)	0.250299919605 (0.982120111086399)	-0.111005881483 (0.999436600206421)	1.7830475783 (0.604247376756516)	-0.45632090282 (0.992814947655907)	-0.194219555232 (0.472919791467468)	-0.268786777549 (0.43617105537514)	1.40035794277 (0.00746218509352293)	-0.443746295203 (0.800619938817766)	0.793598937738 (0.235961379310345)	0.0384194600376 (0.669768981340956)	-0.0894834148313 (0.706478916883656)	-0.364721303551 (0.863722365303378)	0.754803602854 (0.227224103245129)	2.96248324445 (0.27748989273645)	-0.595245859709 (0.645916214888808)	0.851684854251 (0.999994471966)
SINE/tRNA-RTE.Sense	0.827067537685 (0.0230764556241202)	0.465540134647 (0.999994471966)	-0.620720119688 (0.832581861187496)	2.84997494645 (0.0660235165580771)	-0.539374222159 (0.269374229441255)	2.92255058227 (0.984357942469367)	0.0407518572527 (0.999436600206421)	2.10900704496 (0.54955148521251)	-1.72921506216 (0.0144346548188848)	3.62301507092 (0.127835064788665)	-0.710110370273 (0.12118599166073)	2.05696356685 (0.270706936319394)	-0.205484484752 (0.910948434390925)	9.0750811696 (0.184018843346122)	-0.567390536371 (0.332482171269008)	6.17603318371 (0.514699321375592)	-0.383910883117 (0.726658551536072)	0 (0)	-0.229643901925 (0.991369760528665)	0 (0)	-1.12541197201 (0.309841276492473)	22.2754387764 (0.0931090692809046)	-1.58689829624 (0.166286399308111)	2.21587417907 (0.476607690553308)	-1.05114219961 (0.958085766023019)	-0.933864483351 (0.502602798461474)	-1.94022021796 (0.424287779300024)	4.52949483777 (0.0287114934748145)	-1.63660823001 (0.030057907651612)	11.7613026835 (0.000122066154301065)	-0.950801306483 (0.0450628436944895)	3.03889640968 (0.980893980105088)	-1.88104366753 (0.00654615518697189)	5.40785165972 (0.626059736533395)	-0.435002142322 (0.999994471966)	-1.35815107643 (0.142403625710609)	-1.32797365861 (0.444716323447359)	3.67029076052 (0.570123411574775)	-0.0768823984644 (0.701237606566635)	1.86785274415 (0.324655115336452)	-1.51154142285 (0.241967254153806)	50.3702911635 (4.61028664259433e-05)	2.11779479663 (0.367879919556868)	2.87620243967 (0.736905719455969)	-0.863483105319 (0.999994471966)	18.7250495449 (0.0232765753998939)	-1.18028178699 (0.932590675390986)	2.03319495388 (0.565936017876402)	-0.325207246303 (0.77715625249024)
SINE?/tRNA.Sense	0 (0)	0 (0)	0 (0)	0 (0)	0 (0)	0 (0)	0 (0)	-0.99946623962 (0)	0 (0)	0 (0)	0 (0)	0 (0)	0 (0)	0 (0)	0 (0)	0 (0)	0 (0)	0 (0)	0 (0)	0 (0)	0 (0)	0 (0)	0 (0)	0 (0)	0 (0)	0 (0)	0 (0)	0 (0)	0 (0)	0 (0)	0 (0)	0.999599919968 (0)	0 (0)	0 (0)	0 (0)	0 (0)	0 (0)	0 (0)	0 (0)	0 (0)	0 (0)	0 (0)	0 (0)	0 (0)	0 (0)	0 (0)	0 (0)	0 (0)	0 (0)
Satellite.Sense	-0.565855854191 (0.731619026979168)	1.67434453578 (0.303908451935915)	0 (0)	-0.339219280627 (0.984357942469367)	0 (0)	0 (0)	-0.416921643341 (0.999994471966)	-0.967235372541 (0.78726411431234)	-0.0977092791893 (0.999436600206421)	0 (0)	-0.159941406553 (0.982120111086399)	-0.174793964198 (0.980893980105088)	0 (0)	-0.257152698126 (0.984357942469367)	0.509325741963 (0.611896785875962)	0 (0)	0 (0)	0 (0)	0 (0)	0 (0)	0 (0)	0.0781785921693 (0.813620885358013)	-0.0947954865167 (0.951830961842781)	0.075220051691 (0.695488969297388)	-0.170568380777 (0.999436600206421)	2.12023030491 (0.541099775958534)	-1.33839861422 (0.0816059298247906)	-0.197181086805 (0.963618151088496)	0 (0)	-0.472894725772 (0.554516400475541)	-0.125909486466 (0.982120111086399)	-0.582993662203 (0.872849356311679)	-1.30987823673 (0.141752369238517)	-0.589908783089 (0.993413322475143)	0 (0)	0 (0)	-0.644430298452 (0.999994471966)	1.92634253615 (0.324688521524292)	0.514516373213 (0.960066306516443)	0.106723084096 (0.999994471966)	-0.883227211273 (0.723633586260857)	0.27923371927 (0.648317620380162)	-0.30647090499 (0.999994471966)	0.340616553997 (0.648317620380162)	0 (0)	1.10061772997 (0.13639048635717)	-0.65922103629 (0.97706811460324)	0.845400500332 (0.474583936489978)	-0.908523560964 (0.37040070513158)
Satellite/acro.Sense	0 (0)	0 (0)	0 (0)	0 (0)	0 (0)	0 (0)	0 (0)	0 (0)	0 (0)	0 (0)	0 (0)	0 (0)	0 (0)	0 (0)	0 (0)	0 (0)	0 (0)	0 (0)	0 (0)	0 (0)	0 (0)	0 (0)	0 (0)	0 (0)	0 (0)	0 (0)	0 (0)	0 (0)	0 (0)	0 (0)	0 (0)	0 (0)	0 (0)	0 (0)	0 (0)	0 (0)	0 (0)	0 (0)	0 (0)	0 (0)	0 (0)	0 (0)	0 (0)	0 (0)	0 (0)	0 (0)	0 (0)	0 (0)	0 (0)
Satellite/centr.Sense	-0.560789733992 (0.971132661757378)	0.409487944283 (0.703648175912044)	-0.563020684613 (0.971132661757378)	-1.74675077276 (0.611896785875962)	-0.410419777009 (0.999436600206421)	0 (0)	0 (0)	0 (0)	0 (0)	1.03567669008 (0.611896785875962)	0 (0)	1.04992753982 (0)	-0.176687854361 (0.987250187515296)	0 (0)	0 (0)	0 (0)	0 (0)	0 (0)	0 (0)	0 (0)	-0.649610515267 (0.971132661757378)	0 (0)	-0.681776582431 (0.971132661757378)	-0.68457667778 (0.971132661757378)	0.0484579714134 (0.971132661757378)	0 (0)	-0.731357916289 (0.971132661757378)	0 (0)	-0.687900991411 (0.971132661757378)	0 (0)	-0.689733176621 (0.971132661757378)	0 (0)	-0.127147798995 (0.982120111086399)	1.2163725681 (0)	-1.14293633471 (0.832581861187496)	1.20408779405 (0)	1.21955810392 (0)	-1.12698762863 (0.832581861187496)	1.16879056594 (0)	0 (0)	0.94370613708 (0.448645778013808)	0 (0)	0 (0)	0.949820933602 (0.448645778013808)	0 (0)	0 (0)	0 (0)	1.75979344415 (0)	-0.864636044435 (0.578281363790114)
Satellite/telo.Sense	0 (0)	0 (0)	0 (0)	0 (0)	1.00572668637 (0)	0 (0)	1.00644955724 (0)	0.979516937525 (0)	0.992991152668 (0)	0 (0)	0 (0)	0 (0)	1.17803317436 (0)	0 (0)	-0.0722008433424 (0.703648175912044)	0 (0)	0 (0)	0 (0)	0 (0)	0 (0)	0 (0)	0 (0)	0 (0)	0 (0)	0 (0)	0 (0)	0 (0)	1.22911320107 (0)	0 (0)	0 (0)	1.22710069411 (0)	0.119645698709 (0.832581861187496)	0 (0)	0 (0)	0 (0)	0.0197256111273 (0.703648175912044)	0 (0)	1.23446310354 (0)	0 (0)	0 (0)	0 (0)	0 (0)	0 (0)	0 (0)	0 (0)	0 (0)	0 (0)	0 (0)	0 (0)
Simple_repeat.Sense	-1.35413454746 (0.937143618850875)	1.91177849601 (0.204008120166563)	1.83431372407 (0.0751361439523239)	0.433171311581 (0.86211596166098)	3.59875586655 (9.32793789862287e-06)	-1.61131586324 (0.0551816895007371)	3.67453399178 (2.24817968787413e-07)	-0.987853910702 (0.0123663950655401)	3.77855004593 (7.70993000332021e-07)	-2.13918535744 (4.69132297608962e-06)	2.96173652574 (0.000375927448555647)	-1.56116151155 (0.00286399698315055)	4.56340320162 (0.106656351727801)	0.0304321705973 (0.172406555820346)	-0.185559868021 (0.999994471966)	1.67099266552 (0.262122140602355)	-0.571507286291 (0.877412232108419)	-0.618417032798 (0.947602527281269)	-0.53132478642 (0.510722790028048)	-0.190962189987 (0.552096287184909)	2.05440178937 (0.000233379280410853)	-0.0674371325704 (0.0389171571916485)	1.18440527657 (0.0224928084361061)	1.5245228489 (0.058031935723607)	-3.91502298046 (0.0168423067955212)	3.24610940326 (0.210253429896448)	-2.07144340875 (0.312000257923978)	0.256290162673 (0.0247507776580248)	4.1361830148 (5.93712315371957e-11)	-2.56402398749 (0.000425664928868298)	3.55800876502 (0.000731118517740199)	0.497265673479 (0.97706811460324)	-1.20653109913 (0.0111606945460311)	-0.937407208117 (0.0662994840308933)	0.770429241556 (0.0904595816017821)	-0.520584776156 (0.0245416578664131)	-2.2602393719 (0.0140582609839745)	0.37798333139 (0.330201995009959)	-1.1805434454 (0.230706431615744)	4.24023861065 (4.31452471603624e-06)	-0.873628148778 (0.03996286901275)	1.04351965 (0.00436887046677705)	0.609016064646 (0.89019996046457)	-0.511608535171 (0.958154063052147)	-1.76389054557 (0.0564069621660701)	2.14862676599 (0.0220368911666716)	-0.861820099741 (0.0637333125078313)	3.18971351004 (0.0102442643066843)	0.704627500031 (0.465146990475746)
Unknown.Sense	1.18475067103 (0.955322767535152)	0.507918462053 (0.74965657501131)	0.0556220215383 (0.953739557373133)	1.26162842592 (0.132730120462977)	-0.840623530271 (0.329178009891842)	0 (0)	-0.832754397367 (0.977051964305721)	-0.36493823519 (0.237132575531754)	-0.339522431475 (0.828449951738761)	-0.257603550879 (0.58790278611027)	1.25019586581 (0.980893980105088)	-0.457964824531 (0.314119139935944)	-0.661201811973 (0.417940751837634)	1.66436883999 (0.79012810300725)	-1.00627137579 (0.061637371021941)	-0.308694982298 (0.501041414843172)	-0.332476116034 (0.63681255308272)	0 (0)	0 (0)	0 (0)	0.606630523552 (0.716995949722435)	0 (0)	0.359599821916 (0.747414664905568)	1.87012663345 (0.0937946799764132)	-0.040737985316 (0.448645778013808)	1.30310123164 (0.863135668478558)	0.443870158001 (0.92310210637608)	1.88934887799 (0.270967765770329)	-0.861877736508 (0.727826106586015)	1.2490542491 (0.0294900093494388)	-0.361925724969 (0.991955451285543)	1.35739691449 (0.999994471966)	-0.387724256614 (0.338357363545348)	4.75586830756 (0.51242769067693)	0.522198972815 (0.143043508711137)	-0.65169458612 (0.961679503484265)	-0.911028376442 (0.99760593608568)	-0.84490909855 (0.828236330310069)	0.251956886344 (0.998342437155325)	1.29823687459 (0.0322411992226824)	-0.91675111575 (0.957179583482477)	2.14718358273 (0.364031257526489)	-1.28643379285 (0.462966720771779)	-0.884095988173 (0.819462197770044)	-0.780145146043 (0.992125328683716)	-0.714224582 (0.958085766023019)	-1.18087994309 (0.43904111388983)	2.8258504281 (0.607499172441013)	-1.49736597776 (0.590892513047333)
rRNA.Sense	0.0786031802022 (0.972291363268003)	-0.820273664456 (0.615854683328156)	-0.547313954808 (0.957247060937248)	0.411024563549 (0.889298346295617)	0.0958831827033 (0.818969781688061)	0 (0)	-0.589884496905 (0.444672412229629)	0.96157770217 (0.175592716168743)	-0.952487255609 (0.386065723582946)	-0.146226889981 (0.316657683860852)	-0.675111980137 (0.253791792934369)	-0.709072798577 (0.671799092485737)	-0.476474382982 (0.99414998508865)	0.367405121746 (0.441529699365125)	-0.930168359182 (0.0116491398781765)	-0.585749839053 (0.959397969354694)	-0.332464074098 (0.584461259315328)	0 (0)	0 (0)	0.122877308719 (0.516310138630037)	-0.688456435354 (0.38334101244237)	-0.016461753798 (0.767606993117633)	-0.831170850468 (0.378529436643962)	-0.581276584996 (0.268268135170969)	0.344583616914 (0.806564969679264)	-0.526395581682 (0.999994471966)	-0.0877402695758 (0.969936713460053)	0.158860785317 (0.690443202777437)	-0.566166701629 (0.174629201757819)	-0.640646183273 (0.255213531246616)	-0.126425454082 (0.828035314189201)	-0.919573669533 (0.63681255308272)	-0.973032320549 (0.0340128820584484)	-0.620478655687 (0.849571030271944)	-0.551346492786 (0.464771756566138)	-0.666279030922 (0.721691262720947)	-0.21528267918 (0.703648175912044)	0.588580740489 (0.497294545332123)	-0.515014999094 (0.905646814579186)	-0.835302629798 (0.752828878796312)	-0.684426911997 (0.114474519985642)	0.946757354748 (0.400733999924891)	-0.873287171576 (0.891694034413847)	-0.897053913593 (0.945505857016354)	-0.607799020689 (0.999994471966)	-0.114864651873 (0.717549256693883)	-0.949920898399 (0.778815925362134)	4.25392992822 (0.43912206364219)	-0.323175558131 (0.836984634514108)
scRNA.Sense	0.75677842132 (0.963618151088496)	-0.640424452606 (0.984925311400612)	0.527912579696 (0.703648175912044)	-0.927285243307 (0.925060886153489)	-1.46977659456 (0.591021371436245)	0.576196819267 (0.405147929892604)	-0.91070400439 (0.576329908382506)	1.98738538765 (0.337902989406345)	-0.788832108283 (0.851256648772983)	1.26919477877 (0.542669661536046)	0.602242037562 (0.550855851002536)	0.742678298951 (0.265763805313726)	-0.503716127879 (0.999994471966)	1.65467557424 (0.481447225923034)	-1.61049247253 (0.0510299075481298)	3.57313098493 (0.116389184912124)	-0.616268004636 (0.828295953636495)	0 (0)	0 (0)	0 (0)	-1.29400229199 (0.388959944867744)	8.45159661462 (0.00381195015805577)	-1.89992927837 (0.130857113519608)	1.32615688311 (0.52281841331802)	-1.70404324425 (0.238571583304268)	-0.131195844346 (0.782443867859101)	-1.1003597026 (0.406198430269948)	3.72914499277 (0.0160565931090684)	-2.20470033368 (0.0696488017245504)	2.9930420454 (0.0287048377782806)	-0.603851604326 (0.798909415525245)	-0.945820077924 (0.255529528760942)	-0.978800494485 (0.444955955809427)	1.17891860263 (0.980382699704054)	1.11110217752 (0.984271823865516)	-1.53025548567 (0.291396343642066)	-0.00436153378459 (0.672943810008442)	1.9596720783 (0.818451701302252)	-0.725554753338 (0.800233561060761)	1.06937965809 (0.535151453350368)	-1.69456098788 (0.140342657125754)	10.1736835177 (0.0022337779238527)	1.36288263067 (0.857837718265281)	0.633511523743 (0.912692463132491)	-1.17694396609 (0.389889290629607)	1.63532462377 (0.317915864271172)	-0.851411398621 (0.441217627826152)	0.499799491472 (0.747372187403564)	-0.456254522511 (0.983102184986066)
snRNA.Sense	0.0350771219135 (0.285128295496634)	-0.803286889419 (0.999423580225692)	1.62182432248 (0.442056663243811)	-0.110916705665 (0.104499484571768)	-0.907819446508 (0.116058908019344)	-0.127680739702 (0.254506724929803)	-1.23228767796 (0.218784365734707)	2.52828326638 (0.0129145514706416)	-0.96922085402 (0.516276338546213)	0.48175711671 (0.00444377387311302)	-0.845767552982 (0.992265120739463)	1.80143083864 (0.000392025887511827)	2.48668572269 (0.999994471966)	8.51822081847 (0.393844593466261)	-0.843510629564 (0.7901219360707)	2.80310322307 (0.441687870519875)	-0.24468924924 (0.533576382690932)	0 (0)	0 (0)	0 (0)	-0.823040979219 (0.268502596082643)	4.94100766889 (0.121947816199863)	-0.677943107258 (0.121007763179464)	-0.873158683884 (0.991731135613448)	1.01879405769 (0.614541720416735)	1.76948837219 (0.0132512261858687)	-1.10320211429 (0.643816312366409)	0.239652509771 (0.12993415284112)	-1.16366110353 (0.0023895175675189)	1.04278453884 (0.0155445592036754)	-1.16689051937 (0.190520456072722)	-0.889719803676 (0.991160538893591)	-1.08813688103 (0.00806409122431814)	2.05304002349 (0.703648175912044)	0.122589327254 (0.703648175912044)	-0.964166382633 (0.0527740424582024)	0.489478022416 (0.446050086966634)	-0.21940086032 (0.522428975867858)	-0.49301311526 (0.0854872085588583)	-0.120523568282 (0.517752325579342)	-1.27603821861 (0.00701619065962474)	4.72266370821 (0.0199712808704171)	-0.817396003369 (0.183440738405681)	-1.24344236942 (0.143729913174971)	-1.08757345583 (0.13335845341032)	1.67075277562 (0.00135967268180745)	-0.713812743092 (0.0958969311050131)	-0.230064395703 (0.54665532476214)	-0.722431745459 (0.550855851002536)
srpRNA.Sense	1.14497710462 (0.166402764015422)	0.351445575255 (0.427700082294956)	-0.358746629767 (0.856105467093758)	-0.15275861653 (0.971132661757378)	2.85527359219 (0.00560549162416696)	-0.387360246734 (0.989437552307527)	1.18402024064 (0.999436600206421)	1.25780165038 (0.0164560917702955)	-0.0356759085848 (0.9875615576393)	0.929634979351 (0.115984889900373)	0.0460995481836 (0.999994471966)	0.256276016629 (0.103141028578376)	-0.368991963241 (0.423638864952498)	-0.969755109491 (0.517647333440492)	-0.74256203379 (0.911145699287981)	1.1626391374 (0.657268036699263)	0 (0)	0 (0)	0 (0)	0 (0)	0.148214793695 (0.79772731215269)	0.202540288413 (0.999994471966)	-0.592235538533 (0.554429202275846)	0.268504630402 (0.866666017681004)	-0.44765883875 (0.664829683751724)	4.8105270612 (0.11141918282618)	2.56091174067 (0.284983179575555)	4.11678651253 (0.453696664856366)	-1.65661416176 (0.0465503284476934)	1.56661161158 (0.50022803352355)	-1.07361228997 (0.959456496462783)	0.644141931503 (0.687989182674115)	-0.766540567498 (0.99819610106341)	-0.025299138897 (0.964980547816601)	-1.45323536017 (0.399160874635841)	-0.84433064138 (0.815531380753475)	-0.680067647617 (0.683855090606929)	-0.187609461967 (0.987687128617336)	-1.02392233885 (0.127404874092784)	1.21766406334 (0.484643030887551)	-0.986899298425 (0.738883230495353)	10.1774502238 (0.0679965817794983)	2.59038488864 (0.554429202275846)	0.0622632357871 (0.451141321086277)	0.32379891075 (0.999436600206421)	10.3638474405 (0.201871443484893)	0.0581073611293 (0.550855851002536)	0.569351907756 (0.615148990251387)	0.672992461292 (0.504940936528659)
tRNA.Sense	-0.0274449223173 (0.684714695394747)	-0.188141824458 (0.929985394511527)	-0.34901122926 (0.891701113208906)	-1.13484667486 (0.687766761802624)	-0.473001657108 (0.516482161565166)	0 (0)	-0.703483844678 (0.241130404442851)	3.06523520738 (0.832581861187496)	-1.0103787588 (0.0726205477281509)	-1.11920649501 (0.422593743856492)	1.97221986942 (0.453982852617418)	-0.419408931892 (0.687009953077305)	-0.637381405799 (0.326166858979159)	0 (0)	-1.16469057881 (0.0218244982792041)	-0.643785739987 (0.248470997623236)	0 (0)	0 (0)	0 (0)	0 (0)	-0.675003295897 (0.69089200500577)	2.34134749217 (0.344572313075906)	-0.85463413253 (0.386141622143605)	0.0755398986803 (0.991551448890931)	-0.906634164658 (0.767597029751089)	1.93481539136 (0.988774620209005)	-0.241722816201 (0.627472098190258)	5.84553226919 (0.234621478101605)	-0.745527141604 (0.587672306189661)	0.367586808228 (0.999994471966)	-1.1317824688 (0.391681861397382)	-0.578561464612 (0.827222061197102)	-1.16226991448 (0.11933894577929)	-1.33957537859 (0.510536774347853)	0.923251700821 (0.525138120228482)	-0.935945248245 (0.0787066013964053)	-0.913479239875 (0.707117819056789)	3.97870875674 (0.160775219347978)	0.14208767616 (0.999994471966)	2.8424173516 (0.99735959134868)	-1.25790337902 (0.19216549815504)	6.63180246613 (0.0065985372286346)	1.13120770505 (0.616257188869543)	1.41363407294 (0.5570236473888)	-0.799520840928 (0.747949723621955)	2.7935062285 (0.012761184528004)	-1.26351437441 (0.343831904492957)	2.90625532048 (0.0271590917603735)	1.55619214768 (0.26653396202034)
DNA.Antisense	-1.11069058484 (0.836984634514108)	-0.215125083645 (0.532536672768597)	-0.0430972685823 (0.312711902918072)	-0.322124246099 (0.996353654007646)	-0.513297823974 (0.4106235169359)	0.274550692114 (0.999234922632642)	0.659482867517 (0.867181520602848)	0.76900704515 (0.307476355777205)	-0.995801288142 (0.72429389440645)	-0.283515024812 (0.653164707332142)	-0.92711247775 (0.999994471966)	0.297234622893 (0.165316698254588)	-0.920746856928 (0.320543130083654)	1.43067447793 (0.339210963013667)	-0.438776142303 (0.103527770862983)	0.77322251244 (0.703648175912044)	-0.332374597045 (0.351654281124548)	0 (0)	0 (0)	0 (0)	-0.901231435406 (0.463248077569687)	-0.480823857191 (0.982120111086399)	-1.13532335063 (0.561939238886545)	-0.37167577689 (0.999234922632642)	-0.835335432093 (0.93778652711831)	-0.987552553098 (0.984357942469367)	-0.750949955764 (0.999994471966)	0.314570801952 (0.683614541609197)	-1.14784667166 (0.342185413325094)	0.620629876027 (0.448645778013808)	-1.04098341961 (0.707352551751576)	-0.564960976704 (0.999994471966)	-1.54635731175 (0.0471560062324225)	-0.808037602987 (0.737838259075827)	-1.44056796424 (0.453211782322813)	-0.742122486854 (0.734904744375048)	-1.28615769556 (0.437120593748634)	-0.0435039230734 (0.999436600206421)	-0.741258445749 (0.974868140203694)	-0.265375684111 (0.999994471966)	-1.40369664193 (0.111774820691763)	12.7155598522 (0.0116788418089169)	-0.661901338651 (0.330791418917836)	-0.589538853244 (0.631805146570221)	1.58079999344 (0.777262529831166)	0.219364306451 (0.414193785621943)	1.81131864687 (0.23840574050304)	2.10301189119 (0.374656328660524)	-0.672091044961 (0.990216060066799)
DNA/Kolobok.Antisense	-0.651204671479 (0.514169640071608)	-0.80411421682 (0.321227966909201)	-0.739943731888 (0.60736696660254)	-0.654629932878 (0.967024660919848)	-0.876196139492 (0.320543130083654)	0 (0)	-0.573492560371 (0.99819610106341)	0 (0)	0.0719938514189 (0.508914411323501)	0 (0)	-0.10525848955 (0.541099775958534)	-0.519994165418 (0.999436600206421)	0 (0)	0 (0)	-0.486571749795 (0.972070233673123)	-0.030001744486 (0.798152948610191)	0 (0)	0 (0)	0 (0)	0 (0)	-0.727553885691 (0.798152948610191)	0 (0)	-0.749444576631 (0.798152948610191)	-0.806722501849 (0.798152948610191)	2.5663611835 (0.0407152642478993)	0.0191670376325 (0.798152948610191)	1.30837032172 (0.327736691555571)	0.0288088909418 (0.798152948610191)	-0.589831681741 (0.957172487804227)	0.127599043991 (0.752317597713727)	-0.811738719908 (0.657272064186068)	-0.139326614194 (0.408043141183266)	0.382630916874 (0.547485852496017)	1.18849348979 (0.26341965357677)	0 (0)	2.60033351396 (0.025270658232133)	-0.852337543128 (0.52281841331802)	0.287651545095 (0.634791225409011)	0 (0)	0 (0)	-0.75946543538 (0.468308907598548)	0 (0)	-0.767912494034 (0.468308907598548)	0 (0)	0 (0)	0 (0)	0.00398825376327 (0.947558628122013)	1.13335454863 (0.368843870066364)	-0.882822380119 (0.514169640071608)
DNA/MULE-MuDR.Antisense	-0.316249123902 (0.726936567144028)	2.4962343756 (0.740319648759539)	-0.174171916022 (0.673566411382736)	-0.783576996177 (0.63935231756072)	0.190565832549 (0.615148990251387)	0.618125031336 (0.961679503484265)	1.16722842232 (0.50962932655189)	1.60025567973 (0.975277744102519)	-1.02224456689 (0.246354456843837)	1.63807488368 (0.059983890248553)	-1.04323871829 (0.569582332052628)	0.016608843098 (0.860573346661711)	1.09527566883 (0.324204838511605)	0.178138186323 (0.703648175912044)	-0.273439355309 (0.789766112606746)	5.02711435334 (0.703648175912044)	0.571441512539 (0.396434147243023)	0 (0)	0 (0)	0 (0)	-0.198269603455 (0.271325060696526)	0.431810490721 (0.56611038802103)	-0.427177741045 (0.698756648538101)	1.10686237913 (0.977304944139159)	1.15765380587 (0.473222401317365)	-0.874477263832 (0.7955512060959)	0.255283623507 (0.338037544672933)	0.55076332247 (0.957172487804227)	-0.608817860633 (0.501270288661186)	0.789169528778 (0.269815342728152)	0.789117691852 (0.37271406307112)	1.20283756272 (0.599756159833471)	-0.41947414512 (0.807274521263982)	-0.562385351221 (0.974725162476418)	-0.237331787948 (0.873634024450724)	-0.362194512053 (0.542138809128279)	-0.959194326297 (0.83318451204603)	-0.768440449677 (0.995080504597477)	-0.786745715009 (0.703648175912044)	-0.699431294406 (0.836822440879134)	-0.696857556198 (0.846885470101117)	0.914394419096 (0.514169640071608)	-0.492468973274 (0.999994471966)	-0.769969049548 (0.689534298930206)	-0.0776526086354 (0.780664132089204)	0 (0)	1.83669369691 (0.269760600501009)	0.0642063296694 (0.763216309796345)	-0.710307748432 (0.484556886888738)
DNA/Merlin.Antisense	0 (0)	0 (0)	0 (0)	0 (0)	0 (0)	0 (0)	0 (0)	0 (0)	0 (0)	0 (0)	0 (0)	1.02637075863 (0)	1.06706858905 (0)	0 (0)	0 (0)	1.04301350678 (0)	0 (0)	0 (0)	0 (0)	0 (0)	0 (0)	0 (0)	0 (0)	0 (0)	-1.02847220499 (0.999436600206421)	0 (0)	0 (0)	0 (0)	-0.999797735091 (0.999436600206421)	0 (0)	0 (0)	0 (0)	0 (0)	0 (0)	0 (0)	0 (0)	0 (0)	0 (0)	0 (0)	0 (0)	0 (0)	0 (0)	0 (0)	0 (0)	1.02505086385 (0)	0 (0)	1.0754391532 (0)	0 (0)	0 (0)
DNA/PIF-Harbinger.Antisense	0 (0)	0 (0)	0 (0)	0 (0)	0 (0)	0 (0)	0 (0)	1.44838208108 (0)	0 (0)	0 (0)	0 (0)	0 (0)	0 (0)	0 (0)	0 (0)	0 (0)	0 (0)	0 (0)	0 (0)	0 (0)	-0.746796868046 (0.703648175912044)	0 (0)	-0.755213512816 (0.703648175912044)	-0.773542136007 (0.703648175912044)	0 (0)	-0.593659713714 (0.999436600206421)	0 (0)	0 (0)	-0.875878258411 (0.832581861187496)	0 (0)	-0.863767240627 (0.832581861187496)	0 (0)	-0.589751419073 (0.832581861187496)	0 (0)	0 (0)	0 (0)	-0.427208617371 (0.703648175912044)	0 (0)	0 (0)	0 (0)	0 (0)	0 (0)	0 (0)	0 (0)	0 (0)	0 (0)	0 (0)	1.47428416696 (0)	0 (0)
DNA/PiggyBac.Antisense	-0.433467214942 (0.791447596643219)	-0.351326668028 (0.836482909414212)	-0.63918984613 (0.99819610106341)	-0.933632836395 (0.832581861187496)	-0.675120033471 (0.290124002996714)	0.135909077289 (0.67856804303924)	-0.529027989476 (0.999994471966)	0.575406177302 (0.236472172501033)	-0.0936625873102 (0.984357942469367)	1.91720144359 (0.0124855132709828)	-0.857262136583 (0.885126823258778)	0.871254535718 (0.118950894159525)	0.210945490211 (0.462162047272701)	-0.307481739901 (0.423267996616268)	-0.865284169225 (0.729469835298033)	0.159396071997 (0.16142223232605)	0 (0)	0 (0)	0 (0)	0 (0)	-0.308916364924 (0.231913597265023)	1.41385235833 (0.834873600176908)	-0.683542523805 (0.102647078076493)	-1.52525441337 (0.475871614505796)	-0.265688513773 (0.809633102508326)	2.54016690164 (0.979545784733228)	-0.840690880349 (0.99819610106341)	1.35639856309 (0.39102793531906)	-1.1426448425 (0.00437346119156895)	1.90758365706 (0.0160461209055965)	0.267060596346 (0.793964307737007)	-0.174059079126 (0.687040385152)	-0.905524875493 (0.0653599429758087)	-1.04054580945 (0.523167321459324)	-0.503568942528 (0.999994471966)	-0.741969889971 (0.506557013718223)	0.188101849717 (0.222070860817817)	-0.0675871471784 (0.999994471966)	-0.339500258088 (0.999994471966)	0.404806368329 (0.781675821032036)	0.446075983698 (0.963335908820474)	0.0635534725094 (0.777820592064451)	0.909442015921 (0.817154537763981)	-0.300465043161 (0.999994471966)	-0.662297909578 (0.485656648151949)	0.238922731387 (0.718822267985998)	-0.102146262187 (0.943931990002528)	-0.822305681575 (0.521056747225511)	-1.35037866657 (0.446525313744461)
DNA/TcMar.Antisense	-0.160102616001 (0.99819610106341)	0.947767727324 (0.840973854565104)	-0.485838335698 (0.823628303143247)	0.640699904952 (0.285128295496634)	1.13847520387 (0.334619873214709)	0.520473655742 (0.730577868055718)	0.0606715761723 (0.999994471966)	-1.01501070363 (0.920170986077045)	0.351342787623 (0.842414130744371)	0.841428077406 (0.438063725568828)	-1.47756793324 (0.733705704369962)	0.0598551045126 (0.983409403963384)	1.08558931232 (0.612582970470335)	0.105519176334 (0.285128295496634)	-0.211576448122 (0.771761521303762)	-0.0323038088118 (0.296344995806278)	0 (0)	0 (0)	0 (0)	0 (0)	-0.832133246649 (0.313523045545306)	0.093018326654 (0.16656006801905)	-0.109463141276 (0.494283153286594)	-0.0921643702073 (0.691911409706833)	0.275971754 (0.492974610187654)	0.582415193014 (0.703648175912044)	-0.364597849447 (0.999994471966)	0.719303943919 (0.176547278029591)	-0.902820236205 (0.22145850865874)	3.26277377559 (0.0897795302424929)	0.361810036404 (0.602911891159468)	2.36767265113 (0.0195006775515541)	-0.974010723185 (0.205389865174943)	0.354705273638 (0.483767822769328)	-1.23757928002 (0.294757774221983)	-0.549979843046 (0.506019766397125)	-0.297414726771 (0.994146009719776)	-0.688745319936 (0.99819610106341)	0.0649256398312 (0.94990880750283)	-1.51417277248 (0.33327989965766)	-0.685631975982 (0.370902405006804)	-0.276467672757 (0.781555804406294)	-1.84460177789 (0.162373032520277)	-1.48308446373 (0.550313664766461)	0.0316014214213 (0.990216060066799)	-1.90866439811 (0.454440640414175)	0.119010863929 (0.682020956352724)	3.83146249 (0.593075281395684)	-0.37112420109 (0.925040926579566)
DNA/TcMar-Mariner.Antisense	-0.846601170309 (0.668095624914473)	-1.48651148365 (0.512033054733979)	-2.08662958921 (0.155386075872221)	4.48947798166 (0.726178071720372)	-0.188348486329 (0.999980101725488)	-0.700771894054 (0.746319085694917)	-1.39008778909 (0.887584539336321)	3.16747805417 (0.0426940496295596)	-1.09844652718 (0.409195777213431)	3.62078423906 (0.0919895655240792)	2.75754098053 (0.691759421313479)	1.00210020818 (0.172671181484269)	-0.118578198506 (0.99819610106341)	3.69272797799 (0.00209890033616439)	-1.1878256817 (0.348306376225849)	2.43333914585 (0.746150116647391)	-0.196559448474 (0.999994471966)	0 (0)	2.39072814797 (0.456346772956978)	0 (0)	-1.51496107695 (0.00886673143551569)	3.35970796822 (0.100353819588398)	-1.19108135717 (0.456483696942443)	0.00223140890349 (0.999423580225692)	-0.142409390746 (0.975864662391758)	0.811337372771 (0.549222755598636)	-0.628565778378 (0.573489536530296)	3.51457316875 (0.357730705622127)	-1.35868098677 (0.034514945022887)	3.81256221675 (6.95501161099759e-05)	-1.2573020544 (0.428704971453452)	1.66342304488 (0.458279778942492)	-0.12440249035 (0.0749242549166756)	1.08030235938 (0.115487989379975)	0.254577635384 (0.999994471966)	-0.531295746092 (0.951830961842781)	0.236352805424 (0.992768616038185)	2.58280547703 (0.646162181849017)	-0.729063946313 (0.975427429265534)	0.830903660431 (0.315258661831203)	-0.471765598791 (0.71191597627219)	6.75484924917 (0.00304980743931359)	-0.295091352375 (0.554516400475541)	0.520684339196 (0.963532582680408)	0.094603564518 (0.357896116170686)	3.13379183793 (0.0171136297279809)	-0.44963362472 (0.988824714137798)	0.188994167001 (0.0424222337215806)	-1.17391331905 (0.979374259569105)
DNA/TcMar-Pogo.Antisense	0 (0)	-0.980583110577 (0.999436600206421)	0 (0)	0 (0)	0 (0)	0 (0)	0 (0)	0 (0)	0 (0)	0 (0)	0 (0)	0 (0)	0 (0)	0 (0)	0 (0)	0 (0)	0 (0)	0 (0)	0 (0)	0 (0)	0 (0)	0 (0)	0 (0)	0 (0)	0 (0)	0 (0)	0.999582898835 (0)	0 (0)	0 (0)	0 (0)	0 (0)	0 (0)	0 (0)	0 (0)	0 (0)	0 (0)	0 (0)	0 (0)	0 (0)	0 (0)	0 (0)	0 (0)	0 (0)	0 (0)	0 (0)	0 (0)	0 (0)	0 (0)	0 (0)
DNA/TcMar-Tc1.Antisense	2.76177923724 (0.352520611921869)	-0.515895744865 (0.969415173407149)	-0.221747292807 (0.754336702762257)	0.813361611278 (0.376056516635551)	-1.11604770147 (0.20494171253636)	0 (0)	-1.21314296727 (0.734989729228263)	0.545892832971 (0.485732742062399)	-1.46434282326 (0.0287158822312013)	-0.651080751749 (0.312032143137733)	-0.383644744261 (0.982120111086399)	0.141645246823 (0.962745884550097)	-0.832523029416 (0.236472172501033)	2.64105144612 (0.255095088823107)	-1.16452297176 (0.165063273076058)	0.556134216682 (0.992265120739463)	0 (0)	0 (0)	0 (0)	0 (0)	-0.520978891614 (0.63935231756072)	0 (0)	-0.740971627992 (0.387819980576584)	0.0581670121937 (0.816966316825424)	-0.737955196721 (0.947558628122013)	0.773156167193 (0.59593728693756)	-0.476026135825 (0.999994471966)	1.46419181098 (0.281411253805473)	-1.26375977833 (0.0327049594625182)	0.442643129874 (0.637654026829728)	-1.29545169214 (0.560480078109632)	-1.0066201242 (0.570763919811508)	-1.17591719369 (0.00290015040098859)	-1.25145774084 (0.463118054465741)	-1.02856552744 (0.650904142312856)	-0.719645150959 (0.722347519177948)	-0.865536166518 (0.823628303143247)	-1.15624717414 (0.690720653723952)	-0.574976292375 (0.738067897329653)	-1.148620271 (0.537289430582583)	-0.787248215736 (0.612490734394681)	3.28640027292 (0.187983978638184)	-0.896939438966 (0.4824096902026)	-1.00736410496 (0.0982187331452585)	-0.48925264194 (0.970599588671897)	3.72465912413 (0.36691013231353)	0.433245150872 (0.99819610106341)	0.664457447434 (0.999994471966)	-1.11346628346 (0.964104562963213)
DNA/TcMar-Tc2.Antisense	-0.467955660204 (0.703648175912044)	-0.599286932398 (0.299480249741898)	-1.14438516831 (0.598415342203746)	2.06068143105 (0.0635309424417543)	-1.06776955875 (0.869997807156236)	1.73795582404 (0.541484249340829)	-1.71127400613 (0.352456387194)	2.31732954061 (0.060347575545843)	-1.31615635273 (0.294757774221983)	3.79186018744 (0.0212392390769156)	-0.506699916953 (0.770461853107327)	2.02987180921 (0.0533210836435779)	-0.131833488355 (0.611896785875962)	6.76236183756 (0.556752158135543)	-0.388939629627 (0.934611602832868)	-0.0936595540173 (0.767198289109674)	0.41473730588 (0.578587791160585)	0 (0)	0 (0)	0 (0)	-1.13736031642 (0.570763919811508)	9.51474015813 (0.178454778437458)	-1.60227598742 (0.43398043944608)	1.97977302796 (0.999994471966)	-0.566994493966 (0.656794435185997)	4.24786676662 (0.37571545925416)	-1.94990267957 (0.361956233347601)	7.86003293826 (0.0946331457681861)	-1.8277573677 (0.0467089045986597)	4.50062160823 (0.0506231936117905)	-0.810694132254 (0.275394445168862)	-0.0453484364675 (0.770922435652673)	-2.03314534569 (0.0465215053602249)	4.92146508544 (0.0919433875175595)	-0.516921490662 (0.999994471966)	-1.27478424353 (0.278148893359543)	-1.33118556738 (0.216913426798853)	2.72999795691 (0.925701268233424)	-0.0933642027588 (0.765982738814255)	3.77223455798 (0.352008077272265)	-1.70975419031 (0.130008119046892)	11.8369487195 (0.26049832611087)	0.496639329621 (0.955322767535152)	0.307348225596 (0.967209212319685)	-1.30845559145 (0.778099907125547)	3.70695334192 (0.183963750940323)	-0.757262612172 (0.971132661757378)	1.1974659494 (0.6414076491015)	0.0612417452066 (0.353469272362092)
DNA/TcMar-Tigger.Antisense	-0.0466863191587 (0.812773816782324)	0.0529465545093 (0.992768616038185)	-2.95728604925 (0.260885581850987)	2.01195943065 (0.191525202062862)	-4.17552667385 (1.10092211170721e-05)	0.408631429339 (0.458279778942492)	-3.99227863564 (0.000138432421066239)	2.33784926335 (0.514169640071608)	-1.94300905585 (0.11346878199961)	5.83322660447 (1.23101076261269e-05)	1.30141952653 (0.510363746571203)	2.46610644658 (0.000374173139282302)	-1.96143740708 (0.000302706811426973)	5.99771530528 (0.00309825470982677)	-3.18006260851 (0.0187104148073801)	2.41671586591 (0.316857944441383)	0.860657855998 (0.987178349830147)	1.71262186154 (0.250636499326602)	-0.637096465739 (0.378201813809535)	-0.166279828593 (0.985922386216327)	-3.34396911816 (0.000124459467645301)	7.22785195565 (0.00152088256658893)	-2.1916238863 (0.0279009480232763)	-0.690836180291 (0.134782515239512)	-2.33119346042 (0.135297637873389)	2.07372537342 (0.828449951738761)	-3.57979222693 (0.00264888450092574)	3.15540983608 (0.0032387366499298)	-4.29614277413 (2.63697876825669e-05)	8.38349507414 (4.39674004858808e-09)	-3.53152096268 (0.0315076655731823)	2.52593817989 (0.27131424760074)	-3.84209902847 (2.81512159660049e-05)	6.94122219165 (8.60023400412964e-06)	-0.267457261437 (0.989477122774931)	-1.6772140656 (0.758045292521334)	1.1256479834 (0.0340869364990078)	5.94609525911 (0.0373061585508754)	-1.13289994384 (0.991160538893591)	-0.940153003352 (0.999436600206421)	-0.533168235074 (0.65498300911657)	6.48410876074 (0.0220368911666716)	0.837400078756 (0.379939432477119)	1.47133490917 (0.0409901237100732)	-0.776222321489 (0.265819904698409)	5.44285233703 (0.138614297143703)	-1.1975357783 (0.945801468191778)	1.11346818485 (0.345046493976349)	0.41293938033 (0.988774620209005)
DNA/TcMar?.Antisense	-0.236279355839 (0.703648175912044)	0.919714994777 (0)	0.885224044715 (0)	-1.4851496549 (0.832581861187496)	0 (0)	0 (0)	0 (0)	0 (0)	0 (0)	0 (0)	0 (0)	0 (0)	0 (0)	0 (0)	0 (0)	0 (0)	0 (0)	0 (0)	0 (0)	0 (0)	0 (0)	0 (0)	0 (0)	0 (0)	0 (0)	0.999588053536 (0)	0 (0)	0 (0)	0 (0)	0 (0)	0 (0)	0 (0)	0 (0)	0 (0)	0 (0)	0 (0)	0 (0)	0 (0)	0 (0)	0 (0)	0 (0)	0 (0)	0 (0)	0 (0)	0 (0)	0.99950008783 (0)	0 (0)	1.06800501247 (0)	0 (0)
DNA/hAT.Antisense	-0.365019328602 (0.999994471966)	2.78272239619 (0.466743614900831)	-0.244829258844 (0.718095120171706)	2.29848505113 (0.553065670888351)	-0.0965981242499 (0.999994471966)	3.06046944565 (0.0952275851649732)	-0.077822728878 (0.776653585861738)	1.99253381481 (0.030763813157126)	0.0849960678216 (0.699598171028709)	1.22461875097 (0.00038807760037963)	1.59025674844 (0.527827745466068)	0.555480331474 (0.00277510895117654)	-0.900201687225 (0.804824900324251)	-1.38133102022 (0.999436600206421)	-0.213118213222 (0.00697970705237042)	0.875991381525 (0.985493574575348)	-0.437863019207 (0.813798816469837)	0 (0)	0 (0)	0 (0)	-0.677323133331 (0.239099289382347)	2.06234779488 (0.524339112003101)	-0.703694480443 (0.161311439156543)	0.0995616355311 (0.999994471966)	-1.3971765505 (0.42059272303731)	2.35749331948 (0.293615626626936)	-1.46759398587 (0.703779049333926)	1.70709842423 (0.221666348307418)	-1.08323820623 (0.0903500579946013)	4.05127478679 (0.00129570620921742)	-0.515966142028 (0.761920928834963)	-0.453352614807 (0.315556023374711)	-2.07033120217 (0.0154424461161274)	1.22083891135 (0.860688662514264)	0.0567583781102 (0.708581624490355)	-1.56836612973 (0.0995388366352823)	-2.22959220718 (0.0327202034753295)	0.978551294679 (0.976961053656969)	-0.963146477725 (0.486864539605968)	3.11989828441 (5.21700344307468e-05)	-2.04859338456 (0.00629626423577054)	6.05534785419 (0.0424735944045611)	-0.811242448249 (0.180664796035281)	-0.875767905932 (0.604838217435789)	-1.25811786634 (0.228263144716784)	0.0519078802386 (0.85241438830231)	-0.952847406798 (0.396434147243023)	4.3302056345 (0.0362695062540392)	2.31810540475 (0.291396343642066)
DNA/hAT-Ac.Antisense	-0.38771470787 (0.971482848020983)	-1.83753064545 (0.0889851151865965)	-1.03485070624 (0.0899046375284247)	0.557633022177 (0.999994471966)	-0.782429579429 (0.959018979102615)	1.99763296257 (0.383924786548364)	-1.27593704579 (0.576919759548345)	0.890784071805 (0.193287109466241)	-1.14600908953 (0.832581861187496)	3.91343524315 (0.144243632408972)	-0.103285514591 (0.999994471966)	0.856398990069 (0.0424222337215806)	-0.137138766304 (0.749228422625727)	3.33545960303 (0.530125820967461)	-1.36864573983 (0.556752158135543)	5.53519031526 (0.208530660569593)	-0.479050292862 (0.295009505799363)	0 (0)	-0.210787059958 (0.960054715729631)	0 (0)	-1.09947056583 (0.0143797631772987)	1.33124642869 (0.470408145107877)	-1.03806253935 (0.0945188305167685)	-0.777368335564 (0.34245650976186)	0.83614238772 (0.972659109062507)	-0.462229165567 (0.51943100056507)	0.602904661676 (0.999436600206421)	3.30000667891 (0.564892082732683)	-1.04081385028 (0.000559520598927317)	2.9541637261 (0.0165395584027143)	-0.636268696824 (0.441217627826152)	0.198106639663 (0.200698319391112)	-1.56394889092 (0.332600398487628)	2.12586960941 (0.356590351730736)	-0.285153793453 (0.76522605554921)	-0.251334634512 (0.769922719662956)	-0.0521978181808 (0.380668126650653)	-0.41045608368 (0.963618151088496)	-0.245464188936 (0.959018979102615)	-0.230486613838 (0.83136441551654)	-1.09034750603 (0.524494443459043)	8.71089251237 (0.00373964575509283)	-0.588257423357 (0.629409118173732)	-1.02330011851 (0.971132661757378)	0.573270611851 (0.860688662514264)	0.420281715171 (0.313306428803747)	0.327113825658 (0.999994471966)	-0.206984305457 (0.671867695527463)	1.09934916188 (0.211546080240694)
DNA/hAT-Blackjack.Antisense	0.276514311989 (0.415911408767451)	0.168027609705 (0.963485879193184)	-2.49504444514 (0.035290276679493)	2.19490304987 (0.50203299591691)	-1.20263747801 (0.62322706251806)	-0.0591113790138 (0.99819610106341)	-1.26364759487 (0.903206336866546)	1.45911763348 (0.354161123998719)	-0.952912996967 (0.0236464198232579)	3.88267989041 (0.0614054589434912)	0.653886154101 (0.697208752112905)	1.13976661129 (0.842701844387994)	0.639436866111 (0.3298298519026)	2.46330728314 (0.313299655747365)	-0.697664181685 (0.833153999021277)	2.35898001293 (0.0477819707833446)	-0.531361662108 (0.759049273127721)	0 (0)	0 (0)	0.212587465077 (0.585640897024426)	-1.04675486203 (0.222043859337697)	1.77473720426 (0.291620392529967)	-1.69672587124 (0.250547455050445)	-1.10334118443 (0.999994471966)	1.00985046695 (0.84664430613471)	0.30819562448 (0.999994471966)	-1.06391846665 (0.33327989965766)	1.75647997366 (0.409200626181236)	-1.98505643808 (0.257774846555302)	2.06515572185 (0.431119659815971)	-0.805244027624 (0.744098441030025)	-0.028059256507 (0.720408726540638)	-1.85879826857 (0.0321980998716813)	0.366925921931 (0.999436600206421)	0.0883613109509 (0.972070233673123)	-1.79646973587 (0.0841351813936487)	-0.771547691538 (0.378762566301843)	0.877385374195 (0.999994471966)	-1.05943238511 (0.87575727913609)	1.78132711348 (0.474174362530563)	-1.37177165496 (0.333746844728415)	8.13051528779 (0.00469945309561751)	-0.305433671523 (0.405905534282439)	-0.618776216472 (0.754336702762257)	-2.23711785103 (0.0049950279723893)	-0.257422516527 (0.986313599902971)	-1.15238355026 (0.503825629747523)	2.81650290752 (0.00182137520479683)	1.51768681734 (0.932076435092979)
DNA/hAT-Charlie.Antisense	-0.563478157114 (0.332482171269008)	3.17917844253 (0.474084476827471)	-0.702878643151 (0.849316600843361)	3.16020735945 (0.000701511824172743)	-1.00756587459 (0.995363540826187)	2.61700354297 (0.700474569420282)	-2.70774575281 (0.140707872285896)	1.86758717756 (0.668967348407746)	-2.60270626168 (0.179490355439238)	4.09162988825 (0.0998886592683823)	1.99326185982 (0.49621493272776)	0.973954944614 (0.923237142168317)	-1.75458516632 (0.82987340968874)	10.5109262503 (0.000124875812365068)	-2.13359642755 (0.328485473137147)	5.34428630644 (0.0329954888599508)	-0.415772817709 (0.684714695394747)	1.98880573752 (0.0351136435614704)	2.34785090784 (0.0938893221605573)	-0.0393339159949 (0.582856586980536)	-2.03857133919 (0.0754543578614677)	14.5205500767 (7.91020660732098e-06)	-1.62131614521 (0.130992481268189)	5.42075346682 (0.18379886362281)	-2.53442261125 (0.526018426169042)	5.17643520012 (0.0628721844250578)	-3.08467188669 (0.371448352426389)	6.14705927657 (0.00146752963285255)	-3.13655747056 (0.116272027688922)	5.16136264762 (0.000624143293405867)	-1.56929074887 (0.464603931133807)	1.77265955049 (0.267640810133122)	-3.11673841875 (0.00209458307352953)	5.90248776588 (0.00373725402832245)	2.97480886269 (0.0641018884082411)	-1.72401247807 (0.318187461180284)	-2.55116584436 (0.204897734806906)	5.57067922002 (0.0913200291568202)	-1.26402189769 (0.38987800497056)	2.44404659002 (0.62511387448018)	-3.92785632565 (0.00261067626638482)	10.5849839257 (1.4469850588995e-07)	0.757350235656 (0.731385706435278)	0.743308225284 (0.989921474761763)	-2.83354252891 (0.0182502740384057)	3.86355065614 (0.0374931687327928)	-2.53451090755 (0.0284352037925135)	2.63133816971 (0.00128838369335056)	-0.756694610695 (0.988837567560701)
DNA/hAT-Tag1.Antisense	0.272195788561 (0.815531380753475)	-0.759078611678 (0.570763919811508)	-0.295790819441 (0.433864297107938)	0.978568001886 (0.295441268470883)	-0.673961474761 (0.982120111086399)	0.00020148215094 (0.439879749905603)	1.74034033462 (0.700474569420282)	0.552930057764 (0.0974950178230487)	-1.31808099419 (0.485300917080955)	1.19485544284 (0.304811024137534)	0.342091022495 (0.708467509786988)	-0.367671828584 (0.746422378767972)	-0.341071877101 (0.969936713460053)	4.24596386991 (0.281623393772912)	-1.02156003145 (0.407458446745988)	0.991759062238 (0.613947599862505)	-0.0938564464366 (0.728321917368108)	0 (0)	0 (0)	0 (0)	0.157720529846 (0.999436600206421)	1.34156358981 (0.489420815869605)	0.155382094755 (0.947558628122013)	2.36541247875 (0.460664626477985)	-0.751716366535 (0.99501867611433)	2.79445872933 (0.524494443459043)	-1.15506145912 (0.329964258443851)	2.77968244794 (0.597784081334026)	-0.812557909939 (0.162987123516751)	1.58893981738 (0.261929326681576)	-0.313850654494 (0.657756150629518)	0.016858532916 (0.999994471966)	-0.782170609514 (0.954263340602331)	-0.434126913513 (0.79012810300725)	-0.822016032188 (0.405523576460355)	-0.718305433596 (0.806300347251342)	-0.728541504611 (0.895450119199296)	-1.04319526385 (0.177091218653041)	-0.789130365638 (0.580399954507386)	-0.188261275352 (0.538260686914165)	-0.865674336701 (0.568006605812261)	-0.300525771481 (0.703648175912044)	-1.04890097476 (0.562492798808793)	-0.605221218644 (0.864513114771426)	-0.507719987882 (0.370999210772525)	1.0338217397 (0.989871864540448)	-1.00063357801 (0.200470252760854)	0.80606074637 (0.577922792770577)	-0.894686875623 (0.86168300508442)
DNA/hAT-Tip100.Antisense	-0.13968454907 (0.772773248972997)	0.664854811317 (0.305156284959879)	-0.492736338813 (0.999994471966)	-0.471702001581 (0.898025476626581)	0.623804451397 (0.288774662949641)	-0.645730445098 (0.63853808086018)	-0.411280736938 (0.0178707520961801)	0.1452199993 (0.252396699363877)	-0.579755124153 (0.733604367456963)	-1.08970435668 (0.741369648747273)	0.398163310521 (0.812231210424515)	-0.868514267208 (0.688116855670969)	0.104943366734 (0.859854060317923)	0.665379430149 (0.00746292770039237)	-0.663827948137 (0.962622535540401)	0.671795353959 (0.0344592085442238)	-0.560339519303 (0.52639232775727)	0 (0)	-0.313327436051 (0.99819610106341)	0.793974763452 (0.405003841570729)	-0.171240963568 (0.221471528597773)	2.58635812213 (0.0225545124522214)	-0.10887187854 (0.548367734852945)	1.05985776498 (0.64035876333455)	-1.27064234171 (0.114408333525196)	5.31848349857 (0.0401789200395499)	-2.67356393532 (0.196108067719843)	4.78362955564 (0.221909976249122)	0.191625654498 (0.99819610106341)	2.53911380347 (0.0145667097040651)	0.272081883386 (0.158959905880552)	0.157723842278 (0.467871262374174)	-2.4626277985 (0.0270650368574329)	1.71336847463 (0.913795289056873)	-0.979096308635 (0.982120111086399)	-2.29164667027 (0.0514028765595855)	-0.997173821642 (0.0971132677553775)	1.98800665406 (0.528393064923193)	-1.7011839011 (0.138423850128392)	7.88426534398 (0.0234048761778211)	-3.59056721 (5.9992485148797e-07)	2.05855778978 (0.00998842008932264)	-1.58551896222 (0.109640302367608)	-1.88853641159 (0.0296515390399182)	-2.42779174251 (0.0103941228081436)	3.15817711794 (0.0921397939546874)	-1.72917533639 (0.253742102525042)	3.47608860822 (0.00468426412783956)	-0.930675673305 (0.999994471966)
DNA/hAT-Tip100?.Antisense	-0.507947228184 (0.971132661757378)	-0.0655112314952 (0.972726646688945)	0.0169820451969 (0.457783871844978)	0.0134075436561 (0.990216060066799)	0.254708110747 (0.999994471966)	2.20406693684 (0.209215072004362)	0.635146202217 (0.596936626089274)	-0.29035888478 (0.33665523009167)	-0.8989345849 (0.443755068222355)	0 (0)	-0.98747537551 (0.652436182144225)	0.728378240919 (0.157013387342721)	-0.471696003625 (0.980539352528079)	-0.237665216351 (0.785508785694495)	-0.274002378584 (0.320543130083654)	-1.00812966858 (0.592098797871474)	0 (0)	0 (0)	0 (0)	0 (0)	-0.388146976412 (0.99819610106341)	0 (0)	-0.568551188066 (0.90997898115776)	-0.0590193928268 (0.885989262868981)	-0.21386775739 (0.999994471966)	0.126563172969 (0.430076456220716)	-0.535270284331 (0.988774620209005)	1.01746032755 (0.265675449588831)	-0.801757750326 (0.164973069898299)	2.69119695575 (0.192457303472995)	0.430369589479 (0.709967841432838)	-0.199545571923 (0.975947787412812)	-0.964384628829 (0.38475846572643)	-0.894199213535 (0.989924614806474)	3.96544198124 (0.994873938558449)	0.11559354433 (0.40303772106401)	-0.024645965677 (0.520068549344173)	-0.239402220567 (0.999994471966)	-0.526002343424 (0.536644188251402)	0.424773986094 (0.837998510032982)	-0.820726382435 (0.64704809848014)	1.03210662613 (0.447512087515386)	-1.18402607214 (0.241106557014313)	-0.984713487885 (0.798228254108139)	-0.209123399112 (0.804392537546219)	0.186795693567 (0.234208167997168)	-0.798881681322 (0.832581861187496)	0.355101689352 (0.371967742262885)	0.0142396174645 (0.971132661757378)
DNA/hAT?.Antisense	-0.0962293297682 (0.979545784733228)	-0.33125306823 (0.999436600206421)	1.24271702001 (0.704749621574403)	3.57504176593 (0.988834445594776)	0.343446754653 (0.0816816158302712)	-0.746160931418 (0.670882786103644)	-0.57872776393 (0.975269738475285)	-1.42764567502 (0.238800875244848)	-1.30021875245 (0.231608707944667)	0 (0)	-1.78037938633 (0.619529607198715)	4.03500847456 (0.502045285039574)	-0.366774945697 (0.656430601913198)	-0.25496503917 (0.957792662868584)	-0.876681387016 (0.562680889113339)	-0.975638149013 (0.71714559369517)	0 (0)	0 (0)	0 (0)	0 (0)	-0.576102408868 (0.53942257414638)	1.30072232118 (0.570763919811508)	-0.574818207174 (0.645916214888808)	0.334041559145 (0.99819610106341)	1.04740375315 (0.766550993812321)	0.453022901459 (0.346486632460069)	0.393409776474 (0.883174240079773)	1.5781848767 (0.144212341748032)	-0.643274282836 (0.76522605554921)	-0.439144041625 (0.768985291665852)	0.42561353498 (0.964104562963213)	-0.658572998894 (0.543195616687339)	-0.469047016329 (0.639065102702475)	2.15740975228 (0.818241067712338)	-1.02429839976 (0.962968332341875)	0.196125845942 (0.853218552088787)	2.53415719371 (0.326238063649315)	-1.1801075908 (0.888018327372321)	0.62854516483 (0.99819610106341)	-0.176859925065 (0.657778261575166)	-0.316023671922 (0.949105396461132)	0 (0)	0.525717592925 (0.669153047714758)	1.12330850968 (0.158105121286432)	-0.0780225151074 (0.981513292267197)	0 (0)	-0.108010597982 (0.962320897606369)	1.12598284853 (0.999994471966)	-0.124278008515 (0.951830961842781)
DNA?.Antisense	-0.117649916185 (0.972659109062507)	0.117582853206 (0.402103547858149)	1.6851348009 (0.303947084988906)	-1.28696559472 (0.999994471966)	-0.482440257004 (0.969305875011354)	1.18956983346 (0.802194042582477)	0.777009214009 (0.999994471966)	1.75049608083 (0.448004625638482)	-0.877059972501 (0.557641783232908)	2.56497478756 (0.189494024587564)	-0.622758895527 (0.833702947917792)	-0.953669982532 (0.999994471966)	-0.0152082298103 (0.799170214560773)	3.71473311641 (0.33327989965766)	0.871063665379 (0.980893980105088)	1.85145845688 (0.589329608337214)	-0.317312896863 (0.94699660476349)	0 (0)	0 (0)	-0.244758964441 (0.971132661757378)	-1.13433412417 (0.371698418842973)	0.444421940203 (0.624242653163023)	-0.834494746215 (0.794332323209445)	0.518369657071 (0.533729954507826)	0.316334682455 (0.653164707332142)	-0.0452804173476 (0.950559345911688)	-0.165224191273 (0.767866924906312)	3.28053007836 (0.374656328660524)	-1.1598175297 (0.677283709416583)	1.25835560086 (0.78726411431234)	-0.351937935027 (0.66598335472349)	0.350860810241 (0.99414998508865)	-1.05840834712 (0.58538421219224)	1.68306574073 (0.648317620380162)	-0.762405944775 (0.813476978840216)	0.692616329975 (0.685458693096218)	-0.404103177482 (0.964104562963213)	1.21844502719 (0.536352287624252)	1.24791007762 (0.957172487804227)	0.773854339001 (0.387819980576584)	0.0632189013104 (0.999994471966)	0 (0)	-1.40846086469 (0.470163179121453)	-0.427671808683 (0.99414998508865)	1.0599729794 (0.644519640687501)	-1.03999217336 (0.999994471966)	0.691051608949 (0.958178991097964)	-1.15969631125 (0.982120111086399)	-1.18803766531 (0.785508785694495)
DNA?/PiggyBac?.Antisense	-0.591404547176 (0.951132816745908)	1.51958505727 (0.283917015824913)	-0.0927281832695 (0.473688501679998)	-0.563141212783 (0.789837796387314)	-0.229185076291 (0.703648175912044)	0 (0)	-0.445894847505 (0.999994471966)	-0.331131541796 (0.805553436570295)	-0.697614866847 (0.163814760392416)	2.12206886649 (0.26341965357677)	0 (0)	2.31541735997 (0.26341965357677)	-0.0794225993363 (0.585582255083179)	0 (0)	-0.165152580457 (0.703648175912044)	-0.334982399937 (0.805553436570295)	0 (0)	0 (0)	0 (0)	0 (0)	-0.178449833687 (0.55613486270385)	0 (0)	-0.227276468573 (0.541099775958534)	-0.0832898220294 (0.55613486270385)	-0.620211505523 (0.578281363790114)	0 (0)	-0.591892980543 (0.608028234947096)	-0.556768883982 (0.947558628122013)	-0.00652540189489 (0.37040070513158)	0 (0)	-0.102570976009 (0.125182984745736)	-0.419732972869 (0.999994471966)	-0.407929043867 (0.962517091672034)	0 (0)	0 (0)	0 (0)	-0.416920491761 (0.998638167599375)	-0.112710991051 (0.809955058423509)	0 (0)	4.61313175066 (0)	0 (0)	0 (0)	-0.127350890022 (0.959390337375128)	0 (0)	-0.612165131682 (0.288783489295522)	0 (0)	-0.642974499935 (0.196923076923077)	-0.0849834936504 (0.305656665198826)	0 (0)
DNA?/hAT-Tip100?.Antisense	1.55946877982 (0.703648175912044)	-0.0551219642784 (0.703648175912044)	0.518733623218 (0.275394445168862)	-0.788237734711 (0.484947443616696)	2.10957071988 (0.116041166592801)	0 (0)	0.159135968306 (0.969936713460053)	1.75425566056 (0.219131968562086)	-1.0661969362 (0.303908451935915)	0 (0)	0 (0)	0 (0)	0 (0)	0 (0)	1.28775566338 (0.320543130083654)	0 (0)	0 (0)	0 (0)	0 (0)	0 (0)	1.08711435935 (0.703648175912044)	0 (0)	0.538966601234 (0.982120111086399)	-0.798044886814 (0.744098441030025)	-0.581684587091 (0.750325538253326)	0.525918943669 (0.982120111086399)	-0.662453362944 (0.567124110971367)	0 (0)	0.138615881462 (0.999994471966)	0 (0)	0 (0)	1.6083361162 (0.501285255520732)	-0.853178255373 (0.155289846908765)	0 (0)	-0.120635558929 (0.673566411382736)	-0.222246731271 (0.639621099875179)	-0.332239528314 (0.999994471966)	-0.245801106814 (0.958838993362852)	0.394453282812 (0.962517091672034)	0 (0)	-0.741217038329 (0.832581861187496)	0 (0)	-0.757639516204 (0.971132661757378)	-0.767927901441 (0.832581861187496)	0 (0)	0 (0)	-0.724343601034 (0.947558628122013)	0 (0)	0 (0)
LINE/CR1.Antisense	-0.412125719515 (0.0824470319315805)	0.881158177395 (0.999994471966)	-1.06604055384 (0.61026737822885)	3.66113643008 (0.0405278150296682)	0.0699896303005 (0.379939432477119)	1.51313886382 (0.649305503805579)	0.881795157589 (0.409431624463963)	2.07120444181 (0.579197912756543)	-1.70851182474 (0.397211971819495)	4.59620676586 (0.184436413874864)	-0.189221807011 (0.941605436599966)	0.521255006828 (0.950055437204396)	-0.0638678299127 (0.905432113998579)	6.69699254177 (0.0745023011054038)	-0.781230019591 (0.388594970911686)	2.84489039754 (0.540343429742032)	-0.358898235412 (0.959633854695129)	12.0519637842 (0.000264446288191416)	0.861878156503 (0.703648175912044)	0 (0)	-1.59026501665 (0.276901946467254)	11.4481379634 (8.33944724622556e-05)	-1.94529945028 (0.195347176296857)	1.40197009234 (0.99501867611433)	-1.10613985513 (0.453836329103904)	2.0789470009 (0.144243632408972)	-2.0177146252 (0.115282418021511)	1.98934369816 (0.188461723257714)	-1.69520950439 (0.510708053057807)	8.78156196897 (0.00136691017055432)	-1.0151173895 (0.958838993362852)	0.543444853087 (0.703648175912044)	-1.87140769772 (0.00107060181059738)	2.91558160274 (0.584928657686084)	1.84381333757 (0.386720809063464)	-0.0983965175136 (0.0992064873211454)	-2.08032520295 (0.00787883085429096)	5.81526434042 (0.243128570132395)	-0.394875613384 (0.707929063346453)	1.12224967174 (0.452295751661451)	-2.70028007167 (0.00970964786299869)	13.603948957 (0.00383843149128797)	1.33852805475 (0.806564969679264)	-0.218641503371 (0.0357660436577054)	-1.13679368139 (0.74590796551086)	4.02416699173 (0.150611039092364)	0.101393519545 (0.819719581168147)	2.23276561119 (0.169223377203562)	-1.24293995075 (0.81874750730019)
LINE/Dong-R4.Antisense	2.77578931291 (0.091363807468008)	1.32935402697 (0.318597121867723)	-0.191721493037 (0.882889375050424)	0.492452821703 (0.739474174396221)	1.28221072727 (0.48383334779479)	0 (0)	-0.297880413124 (0.734225400497362)	0.560879716397 (0.498205031193399)	-1.15444107622 (0.0506803042755064)	1.37728443206 (0.344986740508383)	-0.710481297001 (0.986485928149727)	2.02338359625 (0.0818349807643563)	0 (0)	0 (0)	-0.14127841377 (0.98912678441339)	-0.191266323761 (0.842836464097315)	-0.701228879252 (0.712212702727861)	0 (0)	0 (0)	0 (0)	-0.37507227492 (0.787802280291702)	0 (0)	-0.567145319969 (0.823767438194607)	-0.182689002874 (0.999994471966)	-0.525396145164 (0.992768616038185)	-1.10324523924 (0.588963830104795)	-0.56033294571 (0.999994471966)	0 (0)	-0.4952470123 (0.230259151696192)	-0.0729003795961 (0.736132959408343)	-0.208259897746 (0.699598171028709)	2.09424226314 (0.188359108976959)	-0.553133998843 (0.635761724298373)	0.905783273262 (0.320543130083654)	-0.636125340074 (0.158736138471135)	-0.488262544014 (0.690695132479118)	-0.749568890613 (0.961164478549937)	-0.312164529994 (0.711673263814963)	-0.581149386199 (0.999436600206421)	1.5787434745 (0.503212740865692)	-0.684456832799 (0.89073208034511)	2.03069870541 (0.342469363018884)	-0.905334621025 (0.280441933693247)	-0.272528161556 (0.760841653971866)	-0.366229997687 (0.969936713460053)	1.16560171059 (0.208919257889536)	0.166027502811 (0.402701516230358)	0.75118546402 (0.195463607494038)	-1.7807396279 (0.0146310162650403)
LINE/Jockey.Antisense	-0.636108897726 (0.653164707332142)	-0.356380015509 (0.990216060066799)	0.124297384022 (0.969936713460053)	0 (0)	-0.743821748151 (0.832581861187496)	0 (0)	0.203226128424 (0.703648175912044)	-0.356529461704 (0.999436600206421)	0.405252694929 (0.645916214888808)	0 (0)	0.797171593654 (0.151163211371973)	0.978767741024 (0.461776026600988)	0.98130580565 (0.252601363473016)	0 (0)	-0.151953540887 (0.999994471966)	0 (0)	0 (0)	0 (0)	0 (0)	0 (0)	-0.108916948527 (0.832581861187496)	0 (0)	-0.227605970264 (0.982120111086399)	0.275025063415 (0.657272064186068)	0.188926511035 (0.996017953162422)	0 (0)	-0.0940549940882 (0.99819610106341)	0.0956993036568 (0.777820592064451)	-0.744787672878 (0.477531506512945)	0 (0)	-0.151232181598 (0.798152948610191)	0 (0)	-0.0103963475275 (0.803463580665892)	0 (0)	0 (0)	-0.428725142974 (0.999436600206421)	-1.35937449352 (0.14951683126273)	0 (0)	0.3615376727 (0.508914411323501)	-0.516454653834 (0.982120111086399)	-0.0615131491006 (0.999436600206421)	0 (0)	0.455190307137 (0.951830961842781)	-0.336067176497 (0.999994471966)	-1.2519214148 (0.506019766397125)	0 (0)	-1.08410799651 (0.703648175912044)	-0.385601043612 (0.969936713460053)	-0.31040233344 (0.999436600206421)
LINE/L1.Antisense	-3.49764771512 (0.0032555933310528)	1.42503055217 (0.9162717040274)	-1.34897989591 (0.340749771015362)	-1.33773298383 (0.169334291361441)	-5.39664982333 (4.02863009597305e-06)	0.398894212334 (0.99819610106341)	-3.39956995139 (0.00168090634386452)	-0.0275079025134 (0.890411314195521)	-3.38630166588 (0.205389865174943)	-1.15018155722 (0.399160874635841)	-3.72304387643 (0.129466356874639)	-0.0772889538039 (0.0390896581231866)	-4.10561601888 (0.00192321576402189)	0.186957727851 (0.383890272089684)	0.283424255815 (0.926529827633728)	-1.13999068774 (0.489764676163767)	-0.583038442207 (0.781189090376452)	-1.47520124447 (0.335127059592406)	-1.45464591072 (0.352456387194)	-0.073269935429 (0.524339112003101)	-4.16350415109 (9.42164191640164e-05)	-1.62889247163 (0.0852766969608323)	-2.30871073517 (0.04491721298996)	-3.8862384148 (0.000105696647965072)	0.899551695427 (0.0945235192541167)	-1.74624639237 (0.457507137228735)	0.522367735531 (0.255213531246616)	-4.10252884334 (0.000160231521676911)	-2.93227179095 (0.0344787487046412)	2.07735228568 (0.616000773878575)	-2.1593859768 (0.075041720854832)	1.36605738248 (0.530238601093517)	-1.0266885823 (0.747372187403564)	0.447222421944 (0.56534341146554)	-2.20751409255 (0.072816938737054)	0.55269030701 (0.00483193951576756)	3.29282285108 (2.20716628536758e-09)	0.498561908638 (0.999994471966)	0.946681374768 (0.0786059487047373)	-0.900078140848 (0.321227966909201)	2.45227305842 (4.13769893650771e-06)	-3.32915126138 (0.00393225308841427)	-2.66823292636 (0.510536774347853)	0.309052401499 (0.0372642865664528)	3.86880248817 (0.000186800044670374)	-1.82145126629 (0.268307189679041)	4.45275739938 (0.000855196254168745)	-2.80220572282 (0.0108324454942332)	-2.6781117842 (0.281325058242735)
LINE/L1-Tx1.Antisense	2.66374763636 (0)	-0.196054500507 (0.657272064186068)	-0.240684924848 (0.657272064186068)	1.05493155547 (0.60736696660254)	-0.969348723901 (0.414193785621943)	0 (0)	-0.422411335375 (0.832581861187496)	0 (0)	0 (0)	0 (0)	0 (0)	0 (0)	0 (0)	0 (0)	-0.484805493265 (0.703648175912044)	0 (0)	0 (0)	0 (0)	0 (0)	0 (0)	-0.991287133704 (0.414193785621943)	0 (0)	-1.0102687194 (0.414193785621943)	-1.06170743175 (0.414193785621943)	0 (0)	0 (0)	0 (0)	0 (0)	-0.79985439524 (0.196923076923077)	0 (0)	-0.682752571243 (0.628579935119888)	0 (0)	0 (0)	0 (0)	0 (0)	0 (0)	-0.392023430888 (0.99414998508865)	-0.907588089461 (0.574474053295358)	-0.380038195308 (0.99414998508865)	1.66809287531 (0.360351906157997)	-0.664107110452 (0.78726411431234)	0 (0)	-0.695039165243 (0.78726411431234)	-0.687075402041 (0.78726411431234)	-0.667710802793 (0.78726411431234)	0 (0)	0 (0)	-0.435913556803 (0.971132661757378)	0 (0)
LINE/L2.Antisense	-1.82858808968 (0.734147589472143)	1.63801509656 (0.314766129577405)	-1.48124659971 (0.816966316825424)	2.49662003101 (0.20741016874397)	0.639348304197 (0.0429797975704401)	-1.045346892 (0.422623542592658)	-0.218170260439 (0.156834709362203)	-0.664047755553 (0.696535541148569)	1.39896781193 (0.012761184528004)	0.148396088323 (0.614916625085941)	3.68537717802 (0.00120665349764745)	-2.31960200277 (0.177882528251737)	0.346130820835 (0.314005053285209)	3.08570755365 (0.00486779885217002)	-1.46392899712 (0.543017381355964)	2.19925867765 (0.192720310160299)	-0.891657136486 (0.685177266507374)	0.209005091756 (0.793653556452183)	0.242909024258 (0.295060105824941)	-0.245737807298 (0.999994471966)	-1.28524870209 (0.123439050869255)	9.82244285944 (4.45838278930832e-05)	-0.971059770724 (0.445959506930764)	4.79019892378 (0.0849626940488011)	-3.62658030345 (0.0174745791858298)	6.84888784034 (0.0614054589434912)	-1.6604934 (0.81360506416235)	7.2826649402 (0.00131335794641601)	0.18732509694 (0.000367639777301282)	3.08994303445 (0.118721032967638)	-0.685684184598 (0.43945953944823)	0.350071265071 (0.957172487804227)	-1.87462557267 (0.0615599282902107)	5.64421812171 (0.00433519817061444)	2.84984148814 (0.733705704369962)	-2.51056132674 (0.102735687362002)	-2.68545903873 (0.109442440936625)	8.56614338975 (3.88722047141172e-06)	-0.58530284525 (0.524339112003101)	3.73774426767 (0.0180245583987281)	-3.4660179002 (0.00534648893797523)	14.4088334708 (3.70108416127537e-15)	6.25104132896 (0.00227834832204284)	3.41408471585 (0.600464814689943)	-4.69661070671 (5.06722221315855e-05)	8.55099028867 (3.70413030235357e-05)	-2.8836604749 (0.00349097764889175)	3.15913478998 (0.226977755685043)	2.59898416735 (0.15080732727893)
LINE/Penelope.Antisense	1.29783573441 (0.226374576530983)	-0.0334722834873 (0.785508785694495)	-1.0064555022 (0.81620381115902)	2.70911767644 (0.391516899187867)	-0.0148627214509 (0.819462197770044)	1.55455624778 (0.303908451935915)	-1.20798792799 (0.65727176407783)	2.82646164482 (0.0810119750726512)	-1.15651318487 (0.541484249340829)	1.21422931472 (0.0458949136852378)	-1.47372119486 (0.567124110971367)	0.996794486739 (0.293709370523752)	0.424462713185 (0.700474569420282)	-0.451192842505 (0.990889008781489)	-0.364677231746 (0.429564260790809)	1.86846133465 (0.770922435652673)	0.537152576953 (0.477254308610608)	0 (0)	0 (0)	0 (0)	-1.13242442738 (0.0884930867748532)	-0.232758750253 (0.999994471966)	-1.09843177041 (0.474583936489978)	0.428424186221 (0.98264690201635)	2.2110477893 (0.598762915187171)	-0.879119506344 (0.706793276882707)	-0.376042150683 (0.537583392519971)	6.3294958427 (0.0112977438657252)	-0.277663704976 (0.557083203444765)	0.257375765827 (0.968155402999042)	-1.56458147517 (0.040766752171716)	0.781340357483 (0.402224398613601)	-1.05832977104 (0.104770445125888)	-0.727890338913 (0.991160538893591)	-0.714229118524 (0.472919791467468)	-0.619257275408 (0.498808276329587)	-0.765222887813 (0.993413322475143)	-0.253407664724 (0.835860652153436)	-0.631138326495 (0.77622374523198)	4.66566087101 (0.459619272783402)	-1.55984938132 (0.0151099861432762)	6.1732069131 (0.175441465646558)	-1.93800336327 (0.00149546128572246)	-1.52690123462 (0.18524829050473)	-0.0911713123945 (0.515183103631575)	0.215962354271 (0.460468588988757)	-0.880655006554 (0.752317597713727)	0.861785532106 (0.72295520040526)	-1.60953994132 (0.33327989965766)
LINE/RTE-BovB.Antisense	0.0349909264481 (0.752317597713727)	-0.93353851937 (0.786851291710746)	-0.859308582327 (0.814991070445801)	1.87915174746 (0.298649030876596)	-0.997475436012 (0.0125531961264908)	-0.113728723994 (0.999994471966)	-1.06073458047 (0.493618066743652)	-0.340122872698 (0.930423420710724)	-0.81995597288 (0.253315861837371)	1.2730613119 (0.0265675979211875)	0.0840337261438 (0.0682804157609256)	1.05021248353 (0.0918490932172445)	-0.605248125562 (0.446863154954895)	-0.422812006977 (0.487359805831195)	-0.900877893659 (0.35979841026206)	-0.535458246863 (0.871993825191069)	-0.330944324326 (0.614541720416735)	1.01066208217 (0.154463168268566)	0 (0)	-0.0141213279847 (0.728321917368108)	-0.679995078784 (0.79157670529525)	3.81063383197 (0.106499039447714)	-0.73236671628 (0.420701109301354)	-0.670165935783 (0.249953673267221)	-0.225100854082 (0.806300347251342)	1.17529098099 (0.553758188823485)	-0.706508190692 (0.925060886153489)	1.16327807341 (0.177467385796856)	-1.12311076461 (0.00971147939406929)	0.975096849532 (0.287853095517288)	-1.23341223523 (0.0826235281460867)	-0.677270786228 (0.710658563318031)	-1.14662347574 (0.209702028447476)	0.711437623695 (0.548367734852945)	-0.136398312702 (0.661877217090453)	-0.658779321342 (0.720927953471479)	0.571916108626 (0.526124088482982)	0.670797995364 (0.999994471966)	0.280115328588 (0.521975063439037)	0.562550517706 (0.789391963170625)	-0.755135347825 (0.707154698126921)	6.09076094571 (0.0278012484976228)	-0.21322757568 (0.999436600206421)	1.66370255926 (0.967209212319685)	-0.414662604467 (0.999994471966)	-0.0572586197829 (0.764999425817657)	-0.148176119005 (0.939016744164722)	1.51708530135 (0.999436600206421)	0.551780703007 (0.454440640414175)
LINE/RTE-X.Antisense	1.80716492824 (0.80428307805763)	0.128344781983 (0.824833099961231)	-0.747975105643 (0.653966345169172)	2.56716849514 (0.0959098865027661)	1.17013773621 (0.583926990786234)	1.35752677323 (0.346145120736057)	1.65335717053 (0.581015217566564)	4.41645527795 (0.0291710769559182)	-1.3279911235 (0.372943478071061)	6.09250774434 (0.0130190636582952)	-1.15190633534 (0.136485109024343)	3.44070828548 (0.182023852017079)	-0.216795979994 (0.996379988450613)	8.33080824178 (0.0463219507104575)	-2.16093597462 (0.0443194466157317)	0.992263064963 (0.673824972926033)	0.138599483955 (0.404693878070433)	5.68495952699 (0.0722650917606781)	0 (0)	0 (0)	-0.101554194287 (0.936088024216009)	10.0685900122 (0.000118183409682641)	-0.869732088109 (0.430096178202325)	0.440960008876 (0.999994471966)	-1.48946298595 (0.993164285208481)	0.924353641265 (0.999994471966)	-1.68515508634 (0.479623736313007)	2.36518791245 (0.385953621471132)	-0.597161747483 (0.076599685697237)	4.60535249187 (0.00326634410934238)	-0.97597474495 (0.283520039914521)	1.54778596312 (0.850693122182291)	-1.89291143326 (0.176442876343844)	2.88773780791 (0.349401444683198)	1.31188011781 (0.999994471966)	-1.13697800867 (0.0997923796551465)	0.0572002669247 (0.813959190147425)	2.48624292192 (0.991160538893591)	0.39770268588 (0.524786854547122)	-0.888028603797 (0.435232367425659)	-1.50453614952 (0.657272064186068)	11.8579163205 (0.000128298051983039)	-0.405233912916 (0.615953756327032)	0.428641077138 (0.718822267985998)	-1.07164434926 (0.376339505433981)	7.44870973198 (0.047877554058893)	-1.5289582443 (0.368587076085138)	3.15176842699 (0.213139956380739)	-2.41811051406 (0.544557731803502)
LTR.Antisense	-0.796447789268 (0.459190167792156)	-0.527902910047 (0.309841276492473)	-0.186578582106 (0.999994471966)	-0.176549488098 (0.563321015140677)	0.29078469976 (0.651512050591256)	0 (0)	-0.774458555784 (0.701616846716438)	0.664623590226 (0.189390898702152)	-0.877151871645 (0.62304960358644)	0.4433979247 (0.775122876712707)	0.712367849759 (0.856074617149402)	0.853355070668 (0.23590765461805)	0.367343512875 (0.794496228025601)	-0.940776428871 (0.474583936489978)	-0.794283635168 (0.653164707332142)	-0.875476499251 (0.983409403963384)	-0.35908189428 (0.614443479046435)	0 (0)	0 (0)	0 (0)	-0.657345038898 (0.246213065332193)	0 (0)	-0.733283031982 (0.2752944333654)	-0.406835307557 (0.699520708958225)	-0.285566858382 (0.999994471966)	-0.785019333722 (0.998342437155325)	-1.03419990193 (0.699069067463965)	-0.319706711726 (0.652436182144225)	-0.268360032503 (0.453406129478764)	0.28390921755 (0.394734239116466)	-0.774062956301 (0.789899368946842)	-0.519792593235 (0.303558183062296)	-0.37218377612 (0.916250919489921)	-0.848092039223 (0.767597029751089)	4.06344038203 (0.767597029751089)	-0.525296028637 (0.999436600206421)	-0.572307470494 (0.483426776822804)	3.73163294801 (0.303303534265689)	0.461956840139 (0.772249078632729)	2.45041903295 (0.179280205345723)	-0.422533695451 (0.409904852313711)	-0.155320384058 (0.768510662902553)	-1.46949447604 (0.278009318652408)	1.39854377164 (0.925620944062659)	0.992842730268 (0.265446285859962)	0.266544213721 (0.223464359657148)	0.823217802667 (0.172549281799906)	1.88255845208 (0.0748591214724506)	-0.322756396563 (0.866070534939427)
LTR/ERV1.Antisense	-1.16877417377 (0.406581850851505)	0.579486892686 (0.0104804302671484)	-0.733309619521 (0.475253600059308)	1.12946882999 (0.755766114946752)	-0.953310939849 (0.0469464742597865)	0.109717095959 (0.463013718085399)	0.111854648988 (0.850333510900107)	2.58760610014 (0.00218814337442436)	-2.36929408184 (0.0862465313549227)	0.732074561666 (0.421039177915502)	0.564821976613 (0.177682272450387)	-0.824956681066 (0.549309668389381)	-0.769952938266 (0.29859904636417)	1.82401893028 (0.0401320448313243)	-1.31261336289 (0.320917547692286)	1.28665991451 (0.20200209434182)	-0.712929064558 (0.351988643767741)	0.15768873912 (0.177882528251737)	-0.555615776012 (0.737469731763344)	0 (0)	-2.24583742245 (0.0335836386234177)	5.67277884997 (0.000792247029012658)	-2.37518973417 (0.0410499214641825)	1.53565216653 (0.449446583892627)	-3.10863791919 (0.00394539801421248)	3.3056182638 (0.00815453368018518)	-2.8421228563 (0.012255735953923)	1.23220292448 (0.0537379611915718)	-2.39592230869 (0.0402020376608608)	0.182059174059 (0.681581854584486)	-0.0230207216711 (0.442866329346169)	-1.82665639697 (0.211010855563041)	-3.64936918228 (1.24835108165046e-06)	2.13822169626 (0.173653111040991)	-2.76399974731 (0.0674720987934095)	-2.66508239255 (1.43412459852885e-05)	-2.73974091215 (0.000125212280405531)	2.09917803449 (0.234993945637567)	-1.07217704424 (0.31942345460245)	3.99762038164 (0.0154816739438515)	-4.28233730472 (8.27048679143102e-07)	5.99510121789 (0.00609578660363711)	-0.681739173321 (0.335671966808206)	-1.45056296705 (0.169115555913653)	-1.26632427345 (0.0334297729592439)	3.50359931917 (0.000122271050948232)	-0.319649780497 (0.540854637096764)	2.45040201778 (0.0444342398029155)	-1.42101176978 (0.502045285039574)
LTR/ERV1?.Antisense	-0.527244448155 (0.319640039972761)	-0.230403385582 (0.818318505844931)	-0.523796601127 (0.225221547789357)	18.1563901226 (0)	-0.299883116535 (0.804003806792791)	0 (0)	-0.51418471331 (0.699330964190219)	-0.136424647451 (0.328450579080067)	-0.428373137833 (0.951830961842781)	0.110866542155 (0.999436600206421)	-0.397252692978 (0.323008613137427)	-0.189497043362 (0.846825543859649)	-0.286655851475 (0.968170985649362)	0 (0)	-0.404787557358 (0.726708456243854)	-0.547761094924 (0.781367601408719)	0 (0)	0 (0)	0 (0)	0 (0)	-0.382275088742 (0.218460895757294)	0 (0)	-0.455735382995 (0.0992754171019223)	-0.509707580304 (0.59097304899764)	-0.641699859795 (0.730577868055718)	0.458921095811 (0.199995814856003)	-0.399330869539 (0.992265120739463)	0.0655606147588 (0.310813171410824)	-0.232243279503 (0.709898435457885)	0.027820701629 (0.450437544712253)	-0.552630755115 (0.582856586980536)	-0.171368818693 (0.995363540826187)	-0.455643257119 (0.319513607094857)	0 (0)	-0.524098037821 (0.281998322631773)	-0.371023633441 (0.79012810300725)	-0.399203519086 (0.800656103697933)	-0.087771392567 (0.502701449732359)	-0.119248069174 (0.742143174993469)	0.144348459909 (0.951830961842781)	-0.458008021974 (0.862464709440707)	0 (0)	-0.6378817139 (0.666676327943839)	-0.545845928796 (0.991369760528665)	-0.336837357062 (0.980539352528079)	-0.500281367949 (0.509911247359949)	-0.604541174059 (0.856074617149402)	-0.252291224644 (0.629440103040069)	-0.361976457271 (0.598415342203746)
LTR/ERVK.Antisense	-0.0324440852184 (0.982120111086399)	-0.182212768106 (0.801584443322797)	-0.901601774031 (0.26252381617555)	0.758713583237 (0.20085722786529)	0.361414737285 (0.187163514261896)	-0.0802969317436 (0.957792662868584)	1.80480976965 (0.999994471966)	0.769019531642 (0.296344995806278)	0.117193056479 (0.423829402210343)	1.3253872359 (0.00641973376136558)	1.94255378152 (0.302376400900267)	0.771208057186 (0.495550406110353)	3.00340639378 (0.482345853705137)	3.22024530303 (0.0789106090851115)	-0.393810052454 (0.905252885014156)	2.61063338052 (0.0510299075481298)	-0.135689870335 (0.999994471966)	0 (0)	0 (0)	0.167945490837 (0.678251362079893)	1.02692221774 (0.042610656377213)	6.2881662835 (0.00168672270744138)	0.511491736781 (0.0921244476560923)	4.3006122529 (0.142676502766312)	-1.47155691583 (0.787556071131871)	2.89430795996 (0.373929317618648)	-0.755812865794 (0.519009256023055)	2.52019755395 (0.0406465227791961)	1.16115194056 (0.256648953936828)	5.11045099411 (1.21537194952185e-06)	0.157309379883 (0.516310138630037)	3.02947787423 (0.10753689790298)	-1.44311220587 (0.00130737293536526)	3.95322124357 (0.0840961598026488)	-1.78719539995 (0.237739601017358)	-1.15282319264 (0.245067218514318)	-1.07826502881 (0.728321917368108)	1.14817609167 (0.482513413728974)	1.18204354466 (0.999994471966)	2.30221932332 (0.24314676648594)	-1.82492692449 (0.000987401784190742)	6.10449026192 (0.0318881356979464)	-0.925574348305 (0.283374343493974)	0.0248402882862 (0.0238986914421178)	-1.29937122217 (0.521975063439037)	3.53391478772 (0.00532312414845424)	0.228425923789 (0.131159503261303)	3.74777243157 (0.0588238792300974)	0.117524738777 (0.320588469681158)
LTR/ERVL.Antisense	-0.767297947014 (0.966243490953017)	0.311869042835 (0.421759591786377)	-2.15523435649 (0.0827292271429137)	3.81040599196 (0.0627095516751534)	-0.212632494023 (0.477076244994687)	3.74598855484 (0.521115188506294)	0.851912983111 (0.621792320786608)	1.60557945886 (0.133594796367977)	-2.28001096224 (0.33663103295505)	1.60382785951 (0.0140161308620989)	1.46918664977 (0.415378014853653)	-0.22358121863 (0.958509040606007)	-0.643913334963 (0.521123072975741)	3.37432212322 (0.0295988289938878)	-1.90856409116 (0.291620392529967)	1.86880871074 (0.316988200946166)	-0.496290432702 (0.809811181228806)	1.29095203556 (0.141346084962118)	-0.758071554695 (0.178871999784674)	-0.498693502574 (0.978870101895072)	-2.26261638384 (0.00124410303276348)	8.7755444455 (1.24562113379059e-06)	-2.19723124849 (0.00270080364814879)	2.50903741292 (0.602021401337055)	-1.10282718023 (0.235625987849052)	5.35920426088 (0.293553085166903)	-3.53905168413 (0.0012542253788575)	1.71972015888 (0.0947112368763766)	-0.574064011428 (0.0229337148210696)	4.12474827824 (0.00132192414917959)	-0.512883301302 (0.968242170899256)	1.70314696064 (0.501041414843172)	-3.2051923047 (1.03525954980537e-06)	3.55322705285 (0.0658305985448005)	3.32723624246 (0.7023739980759)	-1.98772695396 (0.000896453201442826)	-2.38728257231 (0.118116633007363)	2.46071608453 (0.235873487319065)	-1.9331558048 (0.135586526783205)	5.39127803224 (0.145233618913206)	-2.89809942047 (7.84960734140284e-05)	8.7861008627 (0.0060835522326085)	-0.928424514003 (0.319640039972761)	-1.46090138275 (0.396371049758894)	-0.999541894126 (0.01251930178893)	4.80885499619 (0.0407144461397611)	-0.403051266207 (0.260606235144045)	3.06080668808 (0.0847971439816264)	0.403309308526 (0.967704796017004)
LTR/ERVL-MaLR.Antisense	-0.758683643656 (0.827997687486565)	0.515830832166 (0.795988310192594)	-1.64030682334 (0.639933868547457)	1.06164970876 (0.452143833011409)	-0.592276431816 (0.226044104640258)	-1.42927435942 (0.234406876084825)	-1.33652915028 (0.80854842576945)	-0.613127844723 (0.853147299355324)	-2.584621978 (0.377913638244061)	-2.36340288588 (0.322449208630333)	1.92668811781 (0.409195777213431)	-3.78248922937 (0.00256435380716274)	-1.25231226492 (0.42647845588437)	1.72279835959 (0.126495866651757)	-1.45310939696 (0.773352816288853)	-0.193383363327 (0.611896785875962)	-0.570034608253 (0.538236147303499)	-0.71704105769 (0.465993120845608)	-0.0895402989408 (0.99414998508865)	-0.756348792634 (0.393869699050268)	-2.48950732572 (0.154247026905582)	7.33434174781 (0.00253428114242588)	-2.64472438455 (0.183656920609815)	0.187042649178 (0.0751002615918603)	-4.74170116633 (1.11030763911218e-07)	2.87506843313 (0.483842161303087)	-4.57720223934 (2.62248358536211e-07)	1.96463991924 (0.834226482291251)	-1.7313854041 (0.371166502079264)	4.35923270392 (0.326308769474934)	-0.328407631685 (0.464997962365782)	-0.976610229451 (0.332979252315057)	-4.72459716798 (1.69200966731954e-08)	0.53405209078 (0.618745293859484)	0.72655509524 (0.600625726558929)	-4.34237965273 (4.53587926869721e-06)	-3.89007497855 (0.00283090251223805)	5.28438267925 (0.124635146561789)	-2.2026756935 (0.393322416922679)	2.72976762419 (0.0296782183910351)	-4.21360731449 (6.09454980086058e-05)	8.38874126355 (0.00353669345111146)	1.71619695818 (0.83046901655842)	0.162818637162 (0.973540904080609)	-5.29804770064 (1.12224637982121e-08)	7.17268913062 (0.00510095067474989)	-4.06367233636 (0.000187311972479184)	5.39643336182 (0.00243535275200885)	-0.476611480464 (0.0571590997116458)
LTR/ERVL?.Antisense	-0.147287724629 (0.297937903956987)	-1.36039018292 (0.587857857127081)	-1.12670970487 (0.562213036571041)	0.6147280689 (0.984750602986933)	-0.499253139936 (0.733705704369962)	-0.115596612553 (0.497500496556162)	-0.101969904517 (0.999994471966)	0.857514256337 (0.581430420861185)	0.201366227828 (0.998157444469676)	0.382009587668 (0.246210427159652)	0.456668155905 (0.982120111086399)	0.570118534764 (0.576465039200965)	0.92508687874 (0.895129713100187)	1.63454377717 (0.960066306516443)	-0.44063545299 (0.165088394361797)	3.48292078596 (0.12350711136959)	-0.0317104958024 (0.754002499060897)	0 (0)	0 (0)	0 (0)	-0.983342830617 (0.166883492756425)	3.12791735732 (0.76946398793983)	-0.641321544206 (0.33663103295505)	-1.05631429192 (0.19130164771479)	-0.227301447238 (0.522172314139574)	-0.267658867208 (0.804030942475386)	0.0822498332932 (0.641113199262389)	-0.960792348966 (0.982120111086399)	-0.819582220868 (0.251486008316067)	2.0054503698 (0.0437448259277357)	-0.939202405346 (0.635845249367174)	1.06298050964 (0.823625969021648)	-1.2351592571 (0.170692223437051)	7.52599560151 (0.261106029225577)	0.71091073428 (0.982205681945472)	-0.198049698255 (0.99414998508865)	-1.90133102453 (0.213877240939406)	1.78300883916 (0.760726075540598)	1.01008634257 (0.188359108976959)	-1.11363906396 (0.970815487500453)	-1.18010639298 (0.554541415532204)	9.61591712089 (0.0450628436944895)	-0.640949238165 (0.741639823572978)	-0.658397550197 (0.999436600206421)	-0.784082437452 (0.730054686516514)	6.60922815821 (0.050064691724138)	-0.678471755734 (0.637171253085358)	1.52539282407 (0.0981495483525763)	0.851160856585 (0.444261115030114)
LTR/Gypsy.Antisense	1.49348081725 (0.341910917872098)	-0.337442796332 (0.907748718044366)	-0.797120920474 (0.570763919811508)	0.0727893456311 (0.397637901055682)	0.247664612237 (0.636354042577318)	-0.667859180926 (0.701948503427949)	0.287621665148 (0.582698548876551)	-0.155370368404 (0.30852647649316)	0.741735517696 (0.987371069095994)	0.235358468895 (0.421039177915502)	0.0891158640187 (0.999436600206421)	-0.06432502222 (0.0704285568269997)	0.198733681071 (0.314528942866136)	0.505420290479 (0.0568189734169302)	-0.793184726001 (0.233035723963083)	0.347493337833 (0.617935476060518)	0.043880668474 (0.95333541483293)	0 (0)	0 (0)	0 (0)	0.0781452348973 (0.951217487192808)	0.918968533892 (0.340245288938641)	-0.273415901897 (0.707624136553689)	-0.101121370803 (0.896952622440846)	-1.2795445887 (0.508590960114266)	0.610026651078 (0.20085722786529)	-1.69927212636 (0.560555242098213)	-1.9852646813 (0.95333541483293)	0.208779489029 (0.334866319961753)	1.74971718102 (0.269118683082212)	0.117950512979 (0.765072209682901)	0.646580906237 (0.962243906285931)	-1.43383174071 (0.691728116717724)	-0.86190584094 (0.999436600206421)	-1.186053886 (0.869925677092645)	-1.47683213603 (0.366907662170858)	-1.39248140049 (0.888979320728174)	-1.75373977231 (0.813664535200107)	-1.22026047037 (0.697208752112905)	2.50429753557 (0.509795592853758)	-1.42388033248 (0.406630045700801)	-0.0327687897785 (0.728321917368108)	-0.755031355397 (0.99414998508865)	-1.14974572583 (0.680542350901457)	-1.39476529445 (0.687009953077305)	-2.16820737882 (0.130648717801909)	-1.02157250993 (0.95686564893585)	0.789415004705 (0.846296843686952)	0.637210225648 (0.788695245308068)
LTR/Gypsy?.Antisense	-1.09531960969 (0.866142101583928)	-1.00942886146 (0.613947599862505)	-0.454236801086 (0.957792662868584)	0.742995808948 (0.705755075883944)	-0.435543107807 (0.812773816782324)	6.56421555316 (0.0685401348815298)	-0.316350683285 (0.929101227251284)	2.06529402822 (0.177217579419589)	-0.81392296332 (0.79059516062016)	5.90662369731 (0.358665469703495)	-0.650250420025 (0.999436600206421)	0.248680307574 (0.999994471966)	-0.435205806869 (0.593976306535072)	-0.912517260722 (0.855902173687555)	-0.41529219329 (0.482564403285403)	1.29135946248 (0.999436600206421)	0.338052104398 (0.598415342203746)	0 (0)	0 (0)	0 (0)	-0.261974890471 (0.880265516179886)	0 (0)	-0.453564814617 (0.696292928131495)	0.621627832071 (0.150115075565087)	0.329596676679 (0.505080316328492)	-1.34560347889 (0.72094035900724)	1.43005915275 (0.112572680399196)	0.676118068586 (0.952864462765329)	-0.720109124825 (0.593597952425343)	-0.535821191048 (0.999994471966)	-0.958583476372 (0.905666245464607)	1.13900699438 (0.832581861187496)	-1.05805533437 (0.338037544672933)	-1.4866826912 (0.740399702988331)	4.79011434461 (0.293202830615789)	0.710743212195 (0.958838993362852)	0.80211553881 (0.806564969679264)	-1.13466129854 (0.703648175912044)	1.89273666221 (0.568599405114284)	0.148343823665 (0.319693506736486)	0.479041599923 (0.856074617149402)	1.45764018802 (0.453927458410211)	-0.869910088801 (0.953794854506583)	-0.33509094567 (0.577814426132478)	-0.761279138861 (0.238353730671494)	-1.13727948963 (0.630703335219685)	-1.28831235609 (0.4106235169359)	2.02136961253 (0.20405716520573)	-0.3064995303 (0.313186489430918)
LTR?.Antisense	-1.11414450429 (0.999436600206421)	-0.192846982521 (0.968798438812105)	-1.58255804861 (0.121118791763013)	3.0022155096 (0.524494443459043)	0.131719759478 (0.592098797871474)	0.234141259652 (0.996379988450613)	0.152438107425 (0.944397639744404)	3.69973876124 (0.0990392544850405)	-1.68908378993 (0.0594343511233551)	3.99110440683 (0.0817099570371795)	-1.95137728321 (0.395421037408966)	0.137627498122 (0.74105395446573)	-0.123356903784 (0.958085766023019)	1.01805958083 (0.231182279238844)	-0.926255517936 (0.102410941664272)	0.995327262421 (0.446573800309183)	-0.548562813005 (0.546191016619858)	0 (0)	-0.000393240038386 (0.809683618541038)	0 (0)	-1.35648199825 (0.178871999784674)	1.74102297546 (0.309796069795789)	-0.848620594817 (0.68641529492176)	-0.559194569411 (0.0967629953631439)	-1.06215364262 (0.312543040894851)	2.77177514594 (0.856074617149402)	-1.63933350347 (0.288726827959984)	4.29371103119 (0.166217262487768)	-1.81418254833 (0.00520490122797165)	4.56024762475 (0.0380532348686836)	-0.517183599412 (0.7788321982307)	3.24084781117 (0.153003335605461)	-1.98490505036 (0.0119899475421763)	-0.790118640697 (0.999994471966)	1.69294445034 (0.840218573777649)	-0.45032712355 (0.90384344278968)	-0.480006310644 (0.990214542448489)	1.94866335594 (0.464900337802586)	-1.21035688008 (0.976140616579084)	5.76271382245 (0.130230123064063)	-1.91481585424 (0.161555760948926)	11.3363654172 (0.000376357534387027)	-0.087507477679 (0.855761658219434)	0.188749749168 (0.817907775632681)	-1.24728846115 (0.588085554334778)	1.25811529616 (0.58788214914982)	-0.784088958796 (0.998638167599375)	0.370401852291 (0.110903689364463)	-0.927731054276 (0.444811662049766)
Low_complexity.Antisense	-0.695372793014 (0.420056483318059)	4.03177381409 (0.755480460847438)	0.837944760547 (0.418000512175466)	-0.156963637937 (0.857777446799509)	1.32090965805 (0.335732751379269)	-0.442347540046 (0.808204047344223)	1.46776624632 (0.438791389932639)	0.27240322121 (0.582706997287472)	1.98571326188 (0.042978485452831)	-1.43699864 (0.611896785875962)	1.32793670816 (0.00941161216669907)	-1.40712799184 (0.716995949722435)	-0.220664991924 (0.733521656830246)	1.44702643496 (0.460664626477985)	-1.23296050032 (0.733705704369962)	0.676652286985 (0.569702476743319)	-0.39726929938 (0.994153039769477)	0.197784416463 (0.999994471966)	0.0521643814754 (0.449106869763099)	-0.458111585982 (0.681581854584486)	0.311374904259 (0.88142979871253)	5.73389827137 (5.59814496023081e-05)	-0.271268483962 (0.840398707004688)	1.88896285665 (0.217826123548858)	-2.00386870093 (0.00617000748059676)	5.62436853725 (0.000192490506255735)	-2.23868302691 (0.115282418021511)	1.28852420071 (0.0352451468337096)	-0.974505725661 (0.368843870066364)	-0.386596418696 (0.996052107449296)	-1.02993941606 (0.965026309836364)	-0.68731334846 (0.999994471966)	-0.0402117544926 (0.503248199188857)	1.91924762346 (0.444170291174449)	-0.112926898901 (0.966243490953017)	-0.586286005836 (0.44623815696653)	-2.1986007154 (0.0444717233898195)	5.78284081675 (0.0117750994562196)	-1.65391529541 (0.217892356640694)	1.73770970944 (0.0115886295758592)	-1.57268839996 (0.0280761008432051)	6.11540575247 (2.30961360944928e-05)	2.00566673624 (0.436169888324303)	2.21327166859 (0.202855475594471)	-1.84824482451 (0.380426973767948)	3.94922270963 (0.00134191777633877)	-2.02754689491 (0.267692783836152)	0.996292479366 (0.0783353350315446)	1.61935330147 (0.238800875244848)
RC/Helitron.Antisense	1.30003057734 (0.0964465758873466)	-1.24074421306 (0.224369657761512)	0.0429570940047 (0.649486540341082)	2.36762546834 (0.369333757178876)	-0.979943446712 (0.784621775665732)	0 (0)	-1.629771112 (0.420855087550612)	0.711880115996 (0.55356262826102)	-0.885477680315 (0.690695132479118)	4.97963051661 (0.314005053285209)	1.80342380615 (0.788675709441549)	2.66293445664 (0.570763919811508)	0.21130304056 (0.486582782976469)	2.09172588652 (0.152996281249024)	2.28799088213 (0.670141420677027)	1.36144642961 (0.832581861187496)	-0.344099383016 (0.999436600206421)	0 (0)	0 (0)	0 (0)	-0.250788523138 (0.97706811460324)	1.7172281669 (0.468308907598548)	-0.698107355411 (0.71635874256791)	-0.815874398351 (0.963618151088496)	0.823115220516 (0.982120111086399)	-1.6341134475 (0.374019641628715)	-0.277613480048 (0.737104142832851)	-0.00326278134377 (0.478179530291642)	-1.36427380434 (0.165063273076058)	0.935786947139 (0.197662652314785)	0.220492812759 (0.445365267043554)	3.36907129308 (0.10916779467967)	-1.44899593364 (0.422509416389543)	-1.77686112452 (0.713857715355843)	0.517117823278 (0.443538826798411)	-0.406390131931 (0.999994471966)	-0.78058137416 (0.760259053766222)	-1.5543938664 (0.22079741247549)	-0.583182215805 (0.975269738475285)	0.442528394024 (0.706109914911098)	-1.51763749627 (0.0659254630376582)	3.01802301382 (0.386106032906764)	-0.42882186338 (0.982309074246521)	-1.15523185359 (0.241323559088916)	-0.917114041163 (0.0398043178470856)	-0.00309286798722 (0.768510662902553)	-0.847750821146 (0.677379799077394)	-0.0916439193955 (0.406345546329317)	0.919873434577 (0.218753059379533)
RC?/Helitron?.Antisense	-0.399863882362 (0.956814001252997)	-0.974171279307 (0.486263373009903)	-0.533822726037 (0.971132661757378)	0.545088085792 (0.378201813809535)	-0.434444320872 (0.585582255083179)	0 (0)	-0.715637415333 (0.420311241303083)	0.149399736078 (0.679007963190961)	-0.826081467281 (0.169159561843566)	1.01912409259 (0.0998803254204042)	-0.00465547258515 (0.999436600206421)	0.739549369887 (0.0279009480232763)	-0.616773718843 (0.285830084893205)	0 (0)	-0.685862328427 (0.177702766815945)	0.659207896832 (0.514169640071608)	0 (0)	0 (0)	0 (0)	0 (0)	-0.449694511543 (0.883591335786557)	0 (0)	-0.592579520562 (0.500271623367523)	-0.944015027395 (0.458879836591331)	1.5932394976 (0.0437343520058752)	-0.747963882619 (0.982120111086399)	-0.191567074373 (0.984357942469367)	0 (0)	-0.606211501656 (0.319640039972761)	11.1269453897 (0)	-0.696772859177 (0.319640039972761)	0.13320222768 (0.77334879059639)	-0.5018320617 (0.81134168973339)	-0.558533034139 (0.671799092485737)	0 (0)	-0.176847609156 (0.429973622228819)	0.199535233241 (0.156834709362203)	-0.907939516363 (0.167290250527797)	0.202963678832 (0.429972710502912)	-0.731003492769 (0.55613486270385)	-0.557936473442 (0.834692874340014)	0 (0)	-0.879226793222 (0.324323597654276)	-0.227418873931 (0.99819610106341)	-0.348645109585 (0.972070233673123)	0 (0)	-0.502749571253 (0.883013348664526)	0.58605783521 (0.377377622229023)	-1.0881945204 (0.434715489826358)
RNA.Antisense	1.58680505154 (0.999436600206421)	0.72855109842 (0.339867934975233)	-0.697078472874 (0.681581854584486)	-0.634672344824 (0.999436600206421)	-0.663707872907 (0.508914411323501)	0 (0)	-0.699214448489 (0.484556886888738)	-0.351769445683 (0.588788438393201)	-1.01058080591 (0.157892229908633)	0.212731657836 (0.173017435336333)	0.419945782743 (0.516482161565166)	-0.678247544464 (0.975277744102519)	-0.758421916736 (0.648667993564222)	0.783741150598 (0.465708352107806)	-0.173635730387 (0.999994471966)	0.761949101164 (0.338037544672933)	0 (0)	0 (0)	0 (0)	0 (0)	0 (0)	0.373174227591 (0.52281841331802)	-0.515478918244 (0.994146009719776)	0.0221504694839 (0.533729954507826)	-0.850197864854 (0.984357942469367)	0.721745330575 (0.7788321982307)	-0.81771208983 (0.999994471966)	-0.194112734575 (0.615148990251387)	0.0333134784973 (0.967704796017004)	1.40204084162 (0.39910301729165)	0.227257422612 (0.957885677987455)	-0.875030390333 (0.995401296559476)	-0.596137421177 (0.385575815459441)	0.478292489931 (0.834354349097814)	0.264888491217 (0.961164478549937)	-0.797295302377 (0.106042701739288)	0.0470932384034 (0.951830961842781)	-0.606913333346 (0.846825543859649)	-0.254142679987 (0.990216060066799)	6.64214780341 (0.0982187331452585)	-0.916248328453 (0.77622374523198)	1.00893665285 (0.468308907598548)	-0.664910491587 (0.999994471966)	-0.247006242364 (0.999436600206421)	-0.654135780028 (0.962622535540401)	0.742264007158 (0.496083972547281)	1.22227875494 (0.885953869386885)	2.27107254934 (0.233319364582017)	-0.487576696402 (0.999436600206421)
Retroposon/SVA.Antisense	-1.01978099762 (0.676674004403725)	0.233809564197 (0.364481485930607)	-1.87473101194 (0.324024934846349)	1.38267056521 (0.636500103824858)	-1.36251094457 (0.116704312027814)	2.10529382317 (0.777124769246674)	-0.867165856726 (0.534066243815793)	2.35172750563 (0.0429797975704401)	-1.95788662148 (0.0263801536573969)	2.85750824719 (0.000917468449266685)	-1.50749790741 (0.245875323756225)	-0.262059168499 (0.283333473814025)	-0.151673905089 (0.999994471966)	2.49467050568 (0.252916130496981)	-0.795802183415 (0.678222973356283)	0.797477891648 (0.957057293656764)	-0.842199762416 (0.0858872316820143)	0 (0)	0 (0)	0 (0)	-1.97200659372 (0.0878064366758421)	3.49114557764 (0.253999113976059)	-1.88505572957 (0.0932394180227284)	-0.00966125534106 (0.643261532326083)	-0.276140270968 (0.989082275006342)	2.73899079291 (0.230259151696192)	-0.983633469824 (0.705806895189667)	3.26688854166 (0.164871319847452)	-1.97231993464 (0.0234920920120481)	4.28018126035 (0.0196150270073351)	-0.0351310317155 (0.747372187403564)	0.157923340547 (0.999994471966)	-1.47930863814 (0.407841723164939)	1.20225049576 (0.597784081334026)	0.985104333999 (0.736132959408343)	-1.48274240089 (0.171556225772056)	-0.724360367966 (0.995487677872094)	2.17386146995 (0.579910779077392)	-0.69583532012 (0.991160538893591)	3.45482255267 (0.289305496375293)	-2.08458301685 (0.129522670508332)	4.52441793897 (0.193409574101306)	-2.03010217204 (0.0235432474935875)	-1.25680483739 (0.842701844387994)	-2.16920207746 (0.126879427399518)	3.60994169807 (0.0974212492615616)	-2.07583653201 (0.273293796507946)	1.84223611525 (0.213727111957928)	0.318914055016 (0.472547599974368)
SINE/5S-Deu-L2.Antisense	-0.939221817222 (0.762742545199928)	-0.337652831997 (0.986213708517493)	-1.67391606535 (0.151163211371973)	2.37122341297 (0.834692874340014)	-0.5243529204 (0.7979651290449)	2.85703514187 (0.242471208697194)	-1.06030582499 (0.744335901910524)	2.82016258922 (0.479392494955859)	-0.355254258018 (0.992768616038185)	1.37704129492 (0.762635330454938)	-0.923457567392 (0.76522605554921)	-0.200795101254 (0.443538826798411)	-0.235150525903 (0.838941492318405)	-0.1261460357 (0.642824838968584)	-0.57637214522 (0.752388794725526)	-0.282785660803 (0.723041719458859)	-0.649562282051 (0.408043141183266)	0 (0)	0 (0)	0 (0)	-0.58053840039 (0.818451701302252)	1.45881287549 (0.0557497773657346)	-0.651774960459 (0.949993091935222)	-0.668470812826 (0.999994471966)	-0.303758321371 (0.924470506743763)	0.847690880964 (0.115689845197413)	0.00999220786625 (0.999994471966)	1.21121416614 (0.61026737822885)	-1.02798045394 (0.12170679827793)	8.95949659146 (0.0838709086421333)	-1.04960252862 (0.784879653795852)	-0.711685687536 (0.950336607391025)	-0.753718219976 (0.973910430737089)	2.23924240727 (0.781377837418136)	0.293615212096 (0.402843865126404)	-0.372264528126 (0.860337363234062)	-0.313714786233 (0.99819610106341)	-0.271235063063 (0.0686160926157578)	-0.0542391844024 (0.664372554299005)	1.74374412916 (0.52756499004422)	-0.99046257665 (0.809633102508326)	1.91161333142 (0.0463219507104575)	-0.0451290186368 (0.771418585684634)	0.503211490115 (0.427023672278351)	-0.451911488555 (0.962745884550097)	3.09666559535 (0.213735773823311)	-0.698693030837 (0.998157444469676)	2.79462958603 (0.113535238864457)	0.43740549553 (0.649011964606594)
SINE/Alu.Antisense	1.03556292469 (0.445350294019887)	-1.62720218545 (0.0218303947661806)	-2.29877888889 (0.473792683609299)	3.81777372392 (0.00734938385511072)	-7.91966243749 (5.66196258734362e-14)	2.06971782428 (0.418444327797135)	-6.38966266825 (1.89700724932794e-07)	3.2562219859 (0.048701345849458)	-3.41328427446 (0.0458801271921789)	8.38263559223 (1.50237266855223e-11)	2.31685258386 (0.0450628436944895)	6.86167627693 (1.21410598808663e-09)	-3.71439697594 (0.00489445301998378)	7.48219265731 (2.3170959385383e-06)	-1.72980378606 (0.410924398108132)	3.2429488361 (0.0539897143340134)	-1.8012488473 (0.346910292417295)	1.31101238933 (0.847275636091089)	-0.607451252689 (0.709817816888242)	1.72058346081 (0.187825368603428)	-9.71283362766 (0)	10.4044671285 (2.9854768302897e-10)	-8.20156549321 (6.16644583305341e-15)	0.50885378471 (0.0153222449403921)	0.929101133472 (0.290577829853155)	9.42515241598 (3.78118274326868e-09)	-3.5651303185 (0.0481007158272)	9.82884535526 (2.33404214968984e-13)	-11.2859485501 (0)	8.6693606827 (3.63177913859381e-10)	-7.24129299155 (4.18835240245161e-08)	-1.09718075747 (0.267566675022421)	-2.68443915843 (0.00465274048930804)	11.3474080299 (4.87372794826656e-13)	5.1048115505 (0.000454079275843784)	1.02817332299 (0.477076244994687)	1.76353752673 (0.0237162909914397)	3.91269164921 (0.0321002189660503)	0.405343262493 (0.317255944312721)	-0.366184935287 (0.774833562791274)	-3.65099146263 (0.0318990150224711)	15.8674423707 (0)	7.51865133489 (3.52334819542558e-06)	7.17925747248 (7.091724480192e-07)	-0.552432887757 (0.788229745980892)	9.31585377086 (3.45797660137725e-10)	-1.30007860735 (0.83519252912764)	3.93365575709 (0.0266881390824534)	3.14409333907 (0.000481786924851057)
SINE/MIR.Antisense	-1.89511231013 (0.393523288604064)	5.36903790681 (0.0032382844844231)	0.458929673077 (0.968380338875381)	-0.288662359634 (0.443889332519509)	3.34223284071 (1.06934071182e-05)	-2.17321200584 (0.183480255713743)	4.53364987013 (1.51203413425016e-06)	-2.09340743639 (0.0548173445724465)	3.62348110482 (0.0437588021485703)	-2.99871432376 (0.00551631560518337)	5.00596641925 (0.00761385539588967)	-5.16737450625 (1.19125378165758e-10)	-0.298548796305 (0.704749621574403)	4.11915072789 (0.284263530273684)	-1.01019307418 (0.786851291710746)	4.10684782215 (0.00771025734694487)	-0.187047932357 (0.849316600843361)	-0.511069356063 (0.449649802164428)	0.700942654823 (0.733705704369962)	0.0965837205471 (0.846606520679673)	1.97302236914 (0.000169083536562228)	10.7573483276 (7.71901917584852e-09)	0.58318194693 (0.177217579419589)	7.52260532997 (1.70531895771105e-09)	-7.02484033688 (5.81710669163776e-13)	7.39776250381 (0.00227024627352043)	-4.37146129822 (0.000115085962462339)	5.93650620575 (0.00106819238292977)	2.61490741004 (2.19175924180253e-08)	0.069435688345 (0.952587247776372)	3.66772065767 (4.45686462884985e-05)	1.38516141049 (0.952864462765329)	-3.2212771711 (0.0189998181671375)	4.07686803557 (0.323090901335472)	4.03519575776 (0.000465142215131169)	-4.09697064612 (1.74678773515748e-05)	-7.71083909585 (1.67123002847868e-13)	7.64857730393 (3.01521783800864e-08)	-5.19575566495 (4.67808396242546e-06)	9.29581919647 (0)	-5.11500610015 (2.09432297496907e-12)	13.4714075812 (1.84648678474183e-11)	4.10550258435 (0.0396450590478042)	0.935976135859 (0.169334291361441)	-7.93636183211 (0)	11.5524591805 (2.34482145020762e-11)	-7.98967948986 (4.76229349115314e-12)	10.1654387151 (6.85893328688135e-12)	-0.689907066037 (0.033816297915968)
SINE/tRNA.Antisense	-0.832891127953 (0.515705460321755)	-0.98609165144 (0.136541314933952)	-0.626395931144 (0.999994471966)	-0.373608261638 (0.999994471966)	-0.502906904761 (0.774153559686248)	-0.392508923788 (0.465708352107806)	-0.661637798959 (0.653213675110373)	-0.0825521482332 (0.462874770213261)	-0.580278207541 (0.999436600206421)	0.457124215276 (0.79012810300725)	0.059026255837 (0.711721423431385)	1.00359477706 (0.0369402829268972)	-0.43842702519 (0.994264215847411)	2.10589520438 (0.187983978638184)	-0.304936724343 (0.755451285300011)	0.248801774619 (0.77981723033652)	0 (0)	0 (0)	0 (0)	0 (0)	-0.568580977748 (0.391423114741708)	2.20538438982 (0.0511444664084544)	-0.703381731614 (0.520068549344173)	2.40136544007 (0.378655185750573)	-0.661706212651 (0.309031683224176)	0.1623892198 (0.764311804191639)	-0.810799304994 (0.527039150236178)	-0.333967430122 (0.373825753560351)	-0.805498928604 (0.0549847210181345)	6.04916639114 (0.00617077865714983)	-0.821020334801 (0.517735746538612)	-0.667137868457 (0.823628303143247)	-0.50346720347 (0.529859383974047)	1.34092754868 (0.122260965557997)	0.0866288882321 (0.817566567501427)	-0.697161673223 (0.254881458525322)	-0.17414334445 (0.924377888695198)	-0.197676168653 (0.824384211226779)	-0.506233975488 (0.430739156035797)	-0.646382069976 (0.503675895809537)	-0.758331880148 (0.738883230495353)	10.2171360553 (0.000284324046560415)	1.33292728941 (0.754332671294679)	1.22213656957 (0.726900117891618)	-0.616508839302 (0.950075626834851)	7.48964979082 (0.31214511973001)	-0.384597408569 (0.988807775394824)	-0.861246284544 (0.832581861187496)	-0.0767534010657 (0.721691262720947)
SINE/tRNA-Deu.Antisense	-0.301565358727 (0.81620381115902)	3.50425921012 (0.990216060066799)	-0.411948235835 (0.85842478122405)	-0.169679271667 (0.999994471966)	-0.1043269378 (0.27085170963057)	0 (0)	-0.266558642485 (0.860151668983232)	-0.227586244831 (0.982152681771328)	-0.177071744815 (0.980893980105088)	-0.422861142563 (0.644437482120863)	-0.322231682531 (0.767115694496798)	-0.073795247378 (0.972070233673123)	-0.134668009519 (0.833741424104686)	-0.290186721816 (0.995401296559476)	-0.254672428083 (0.681227956907839)	0.132467834183 (0.385228118646059)	0 (0)	0 (0)	0 (0)	0 (0)	-0.316156640086 (0.798912309226168)	12.0994075704 (0)	-0.293423415065 (0.414193785621943)	2.33564610702 (0.959457822542935)	-0.449008107447 (0.883174240079773)	-0.0595670855984 (0.302866297897859)	-0.459266835289 (0.909056957575334)	4.56087263823 (0.276508539633694)	-0.372670125611 (0.733705704369962)	-0.119869738788 (0.378201813809535)	-0.200191974732 (0.823625969021648)	-0.390951443209 (0.999994471966)	-0.364684227125 (0.707806167092054)	-0.515597346099 (0.22849259689897)	-0.117631429366 (0.996379988450613)	-0.181668435346 (0.999994471966)	-0.4073310502 (0.957172487804227)	4.28033611388 (0.999436600206421)	-0.212033663805 (0.999994471966)	7.7820528544 (0.703648175912044)	-0.407625816552 (0.399160874635841)	14.97938155 (0)	-0.393440450622 (0.999994471966)	-0.195162013666 (0.982120111086399)	-0.191608662931 (0.984925311400612)	6.25988711833 (0.453115144728061)	-0.224814647563 (0.902700258701324)	3.77078661025 (0.999994471966)	-0.252800490316 (0.792443397188211)
SINE/tRNA-RTE.Antisense	1.16379296742 (0.56177053683328)	1.33529880574 (0.198298726650435)	-0.259357732541 (0.766363005297097)	2.99264232356 (0.284337285070075)	-1.02046181771 (0.242780154408324)	2.97378760629 (0.0748572874430301)	-0.525219093549 (0.315791825431645)	3.36328700617 (0.0916223259617165)	-1.25040865621 (0.239930458352756)	3.26114224142 (0.0100857297855534)	-1.30549984022 (0.313320173157022)	2.72781424358 (0.0461317618910529)	-0.743243729802 (0.808064585644446)	2.5605140617 (0.188870149663711)	-0.56373740135 (0.275684940119246)	3.58911712778 (0.293069810342704)	-0.621035813729 (0.436652367945135)	0 (0)	0 (0)	0 (0)	-1.0037400286 (0.310482428902477)	-1.02914753343 (0.970337538502684)	-0.264609733324 (0.772249078632729)	-0.109956211887 (0.947121773850118)	-0.24385523625 (0.324688521524292)	-0.405265353823 (0.999994471966)	-1.27614133778 (0.668109473018644)	6.90759896245 (0.0260432915147025)	-1.65657317074 (0.0254999024360887)	4.38258072343 (3.17216485386744e-05)	-1.26935613756 (0.693423333608004)	-0.229589663436 (0.787687169058409)	-1.29422663324 (0.0964465758873466)	1.13097401954 (0.45692746817297)	-1.40298176076 (0.6768777374836)	-0.28549021633 (0.588702444931341)	-0.322151341568 (0.650058620167243)	0.0967146094161 (0.0662260189523239)	-0.736370881579 (0.969273281789437)	-0.638841722306 (0.926348811767122)	-0.925494743169 (0.813959190147425)	8.36077363411 (0.10058975789756)	-1.05214233715 (0.602026957049125)	-0.491132418175 (0.948972223531708)	-0.0589562754391 (0.947558628122013)	-0.324836847131 (0.988834819304305)	0.556183564371 (0.941304377767347)	-0.896362793924 (0.882476092739073)	0.0666335134444 (0.573311106068262)
SINE?/tRNA.Antisense	0 (0)	0 (0)	0 (0)	0 (0)	0 (0)	0 (0)	0 (0)	0 (0)	0 (0)	0 (0)	0 (0)	0 (0)	0 (0)	0 (0)	0 (0)	0 (0)	0 (0)	0 (0)	0 (0)	0 (0)	0 (0)	0 (0)	0 (0)	0 (0)	0 (0)	0 (0)	0 (0)	0 (0)	0 (0)	0 (0)	0 (0)	0 (0)	0 (0)	0 (0)	0 (0)	0 (0)	0 (0)	0 (0)	0 (0)	0 (0)	0 (0)	0 (0)	0 (0)	0 (0)	0 (0)	0 (0)	0 (0)	0 (0)	0 (0)
Satellite.Antisense	-0.816194951565 (0.303908451935915)	0.0379763949541 (0.752317597713727)	0 (0)	1.47063583131 (0.952848181820054)	1.35469887249 (0.0555277035255639)	0 (0)	0.900980276699 (0.68038541196184)	9.95149687344 (0)	-0.193244179928 (0.982120111086399)	-0.850495283413 (0.60736696660254)	-0.144312348952 (0.383039188736353)	0.148237209193 (0.728256945446164)	0 (0)	0.630773635078 (0.954944998885806)	-0.986231140495 (0.313524411051942)	2.65763959068 (0.982120111086399)	0 (0)	0 (0)	0 (0)	0 (0)	-0.806350840419 (0.457280751902379)	-0.767208766682 (0.691397298345941)	-0.427902273964 (0.991160538893591)	1.7732597378 (0.999994471966)	0.016708991785 (0.999994471966)	-0.113696412252 (0.392338301140719)	-0.225225892424 (0.883013348664526)	-0.73811153819 (0.997169948242933)	-1.15810979126 (0.515452356076265)	-0.160486795799 (0.859405099446555)	-0.0795623932892 (0.808523147070433)	-0.923167565638 (0.852183316651077)	-0.856986507911 (0.454017888232186)	-0.17985806946 (0.687009953077305)	-0.407043880074 (0.811662962121743)	-1.21203019977 (0.152119080722685)	-0.776288140725 (0.523321888900438)	1.07195960497 (0.780653315356005)	-0.942578242001 (0.218366628169563)	0.071822211793 (0.706478916883656)	-1.3574942891 (0.210253429896448)	0.845900071508 (0.846825543859649)	1.33329867916 (0.765072209682901)	1.17464130244 (0.999994471966)	-1.11822151192 (0.319640039972761)	0.683420981449 (0.999994471966)	2.03724289079 (0.0540050738733)	1.82212133646 (0.744327104295729)	-0.55024035664 (0.99414998508865)
Satellite/acro.Antisense	0 (0)	0 (0)	0 (0)	0 (0)	0 (0)	0 (0)	0 (0)	0 (0)	0 (0)	0 (0)	0 (0)	0 (0)	0 (0)	0 (0)	0 (0)	0 (0)	0 (0)	0 (0)	0 (0)	0 (0)	0 (0)	0 (0)	0 (0)	0 (0)	0 (0)	0 (0)	0 (0)	0 (0)	0 (0)	0 (0)	0 (0)	0 (0)	0 (0)	0 (0)	0 (0)	0 (0)	0 (0)	0 (0)	0 (0)	0 (0)	0 (0)	0 (0)	0 (0)	0 (0)	0 (0)	0 (0)	0 (0)	0 (0)	0 (0)
Satellite/centr.Antisense	-0.279809690067 (0.999994471966)	0 (0)	0 (0)	-0.149870285038 (0.626059736533395)	0 (0)	0 (0)	0 (0)	1.35883476991 (0.414193785621943)	0 (0)	0.0536340122483 (0.386106032906764)	-0.499560141366 (0.78726411431234)	0.0475883337431 (0.386106032906764)	0 (0)	0 (0)	-0.189786015296 (0.982120111086399)	-0.240014890602 (0.982120111086399)	0 (0)	0 (0)	0 (0)	0 (0)	-0.250291323477 (0.703648175912044)	0 (0)	-0.284836536038 (0.414193785621943)	-0.293392688956 (0.703648175912044)	0.786668443776 (0.62322706251806)	0 (0)	-0.442377787614 (0.999436600206421)	0 (0)	-0.361116197437 (0.980893980105088)	0 (0)	-0.60473757324 (0.703648175912044)	-0.160142583487 (0.414193785621943)	-0.452447409878 (0.956814001252997)	-0.398654149933 (0.951830961842781)	0 (0)	-0.481489062781 (0.999436600206421)	-0.359154485308 (0.999994471966)	0 (0)	-0.486280021654 (0.999436600206421)	0 (0)	-0.28375513741 (0.832581861187496)	0 (0)	0 (0)	0 (0)	-0.462537307199 (0.626059736533395)	0 (0)	3.62405949406 (0)	0 (0)	0 (0)
Satellite/telo.Antisense	0 (0)	0 (0)	0 (0)	0 (0)	0 (0)	-1.00416937318 (0.703648175912044)	0 (0)	0 (0)	-0.26233852573 (0.832581861187496)	0 (0)	0 (0)	0 (0)	0 (0)	0 (0)	0 (0)	0 (0)	0 (0)	0 (0)	0 (0)	0 (0)	-0.213090658241 (0.832581861187496)	0 (0)	-0.238746751289 (0.832581861187496)	0 (0)	-0.255580959853 (0.832581861187496)	-1.13518100944 (0.832581861187496)	0 (0)	0 (0)	-0.663891273984 (0.999436600206421)	0 (0)	-0.686248245358 (0.999436600206421)	0 (0)	-0.821710203517 (0.971132661757378)	0 (0)	0 (0)	0 (0)	-0.664586924105 (0.999436600206421)	0 (0)	0 (0)	0 (0)	-0.829160012191 (0.971132661757378)	0 (0)	-0.827541862054 (0.971132661757378)	0 (0)	0 (0)	0 (0)	-0.234544001073 (0.832581861187496)	0 (0)	0 (0)
Simple_repeat.Antisense	-0.478850952283 (0.999994471966)	0.748737597862 (0.853127042221239)	1.43955146116 (0.490949283673542)	0.812592112686 (0.270967765770329)	2.62357746036 (2.34098048453879e-06)	-1.42968536702 (0.0163160025361261)	2.99965078819 (7.49699530598635e-06)	-0.714294499748 (0.447332890706522)	5.6935919466 (8.15618379166294e-07)	-3.07884272405 (0.000690702008401767)	6.72879762987 (0.000117333225218281)	-1.45553335321 (0.0131519220447266)	1.12978861875 (0.0100344750600814)	-0.900717392591 (0.541099775958534)	0.158744774173 (0.0939588044013621)	1.48445733603 (0.149413382063201)	-0.113176494408 (0.551578747547033)	-0.800625068227 (0.18248279567553)	0.53350879582 (0.679433025748222)	-0.417262493002 (0.600097779771558)	3.10487972584 (1.0474078536366e-08)	3.65977351696 (0.388954396270381)	1.27130464977 (0.000115022260869415)	4.19040782803 (3.70135727339851e-06)	-2.51521997665 (0.118601903185524)	2.17274891359 (0.218708496214397)	-1.6839477015 (0.319406553779577)	-2.40412791033 (0.0224071898494786)	1.45769241088 (4.50584230241265e-08)	-2.45054481118 (3.0925904571006e-05)	1.69110025023 (0.000268087747560726)	-1.49603705381 (0.947867397036573)	0.430033740784 (0.0866873096782769)	-2.01953669257 (0.00150942665592386)	2.27313693083 (0.339961493251284)	-1.99675016484 (0.134788346977509)	-3.35477361425 (5.11261098484364e-05)	1.95923319573 (0.233822308331027)	-2.37138066685 (0.00524619524084778)	1.52409263582 (0.001083457817376)	-1.64840411239 (0.0233548148506874)	3.55280376986 (0.0467728723927595)	3.24995686258 (0.691801521794643)	2.61535942058 (0.935003420259404)	-2.92339291108 (0.0452675494683088)	1.60137938569 (0.0590922202294307)	-2.14602268691 (0.204717818078583)	2.16447800852 (0.0132118482001636)	1.66794830155 (0.578342481403566)
Unknown.Antisense	-0.0694803252942 (0.789809217670612)	-0.32346209469 (0.999994471966)	-0.31499085381 (0.545041929993411)	-0.0544838568175 (0.963335908820474)	-0.015198683512 (0.982120111086399)	-0.000943063709409 (0.550855851002536)	-0.5433018682 (0.701766013101458)	0.849430376496 (0.320543130083654)	-0.747137400979 (0.365943737610355)	0.0189178525962 (0.215343156820144)	-0.0849666435136 (0.832581861187496)	0.353476578729 (0.147337377789029)	-0.438744992904 (0.99819610106341)	1.42040299508 (0.183032627416894)	-0.0136686373145 (0.992768616038185)	0.434714793642 (0.471428381050109)	-0.275091738866 (0.702754612079858)	0 (0)	0 (0)	0 (0)	-0.52376706609 (0.38987800497056)	-0.0692350501413 (0.25054175940947)	-0.660246255436 (0.386065723582946)	-0.0750233543703 (0.961679503484265)	-0.729895135221 (0.971132661757378)	4.21720270876 (0.494686427612401)	-0.353369073976 (0.935206249297708)	1.20149951946 (0.155500734874956)	-0.579610822723 (0.127738215282143)	2.42341800171 (0.114906145108803)	-0.540305843655 (0.305656665198826)	0.302311616619 (0.9068416033116)	-0.505447952539 (0.792443397188211)	1.03793589787 (0.212301510708333)	0.292493175201 (0.982120111086399)	-0.0166670462062 (0.912199132935425)	-0.347088387702 (0.67856804303924)	0.528316324854 (0.498480481202221)	0.0403270631098 (0.77809745122332)	0.107071973778 (0.108722725866489)	-0.924442796944 (0.64266225006278)	5.89247683833 (0.0751219946856181)	-0.490050276301 (0.813196581574868)	-0.246302381544 (0.999994471966)	3.08730912004 (0.548078450207156)	0.988003326443 (0.251736072139641)	-1.04431019047 (0.327557334834225)	0.592132197204 (0.0325735535224144)	-0.963672564455 (0.331370801667353)
rRNA.Antisense	0.247045064051 (0.700049892421917)	-0.90482313413 (0.645916214888808)	0.368149955643 (0.980893980105088)	0.512661363022 (0.592460916689865)	-0.730768406683 (0.741047945257233)	1.29693456715 (0.404101639698413)	-0.702485370516 (0.900513343996394)	0.704820407952 (0.23280579607549)	-1.48518686182 (0.183275576905083)	0.217935903104 (0.995401296559476)	-0.812812521214 (0.958838993362852)	0.0976240311258 (0.456183483165764)	-0.494959076998 (0.995080504597477)	-0.759779846436 (0.982120111086399)	-0.816727731161 (0.845442701598135)	0.561556673698 (0.74420366867622)	-0.56910129371 (0.257851649940804)	0 (0)	0 (0)	-0.40023609162 (0.987371069095994)	-1.43069520066 (0.00214416398194813)	2.402217538 (0.00752217586971948)	-1.45625629844 (0.0236734234396171)	-0.205129655862 (0.957960007352008)	-0.739548942894 (0.999994471966)	5.81949862527 (0.553827534179218)	-1.08975174612 (0.397013160233954)	2.22355468836 (0.101658307959248)	-1.54959815831 (0.00669653477002521)	1.55890674552 (0.0599274514138824)	-0.794671324633 (0.445959506930764)	-0.274270776554 (0.94373589924872)	-1.17740813331 (0.00482121702688498)	1.44774886764 (0.78149402532782)	1.67633690019 (0.762012926537597)	-1.13976617724 (0.130708326342858)	-0.106425304685 (0.798513988971436)	0.518167239222 (0.855937524249483)	1.84603082513 (0.97706811460324)	0.0685979559983 (0.998237727449715)	-1.11772999645 (0.171650360925716)	3.03847197982 (0.194114484039721)	-0.781813593677 (0.555192390034567)	-1.24042178655 (0.39715867776234)	-0.200160419611 (0.999994471966)	-1.75443822747 (0.324585555638058)	-0.809764534425 (0.99819610106341)	2.17042979837 (0.811982827636702)	-0.46384696735 (0.999994471966)
scRNA.Antisense	1.0579357754 (0.351988643767741)	1.49537030293 (0.945505857016354)	-1.79573219276 (0.104119737541729)	1.42965240104 (0.432842671585902)	-1.11797325327 (0.533377297657887)	0.947668302473 (0.0369819149513947)	-1.4937871946 (0.208264813835851)	0.44135873237 (0.208919257889536)	-1.74350680928 (0.100871483043303)	2.46048276999 (0.0294193071922873)	0.654984705652 (0.476298558584666)	0.260450171622 (0.851614932800522)	-0.932261807515 (0.862773312952442)	1.26410791074 (0.0620956964168453)	-0.662078521473 (0.0117956961022021)	0.492188614125 (0.891345504250336)	-0.0613332903131 (0.773924736959849)	0 (0)	0 (0)	0 (0)	-1.42601858868 (0.0270824953593855)	4.2357248157 (0.023844513224171)	-1.58923626227 (0.0542163807013913)	-0.145149609294 (0.686904660266903)	-0.478134180408 (0.893912961813514)	-0.622633932518 (0.679007963190961)	-1.40259328592 (0.209702028447476)	1.60220677945 (0.0110464869954626)	-1.24207977463 (0.176370256026158)	2.1252636363 (0.00717336217221045)	-1.40201018518 (0.242038480495432)	1.03616586198 (0.570763919811508)	-1.72839404565 (0.188114618387141)	1.08251739067 (0.770922435652673)	-0.654708024119 (0.307532709250812)	-1.41231332001 (0.079042778790225)	-0.657554168862 (0.599756159833471)	-1.26663493936 (0.801779651376768)	-0.547842182287 (0.200326909790147)	-0.770747831377 (0.999994471966)	-1.57150820294 (0.0327202034753295)	2.95904847568 (0.00936471549621024)	0.689731822228 (0.478109163084302)	0.322290009255 (0.999994471966)	-0.63631022782 (0.99819610106341)	5.87284872717 (0.0100344750600814)	-0.325870381543 (0.921135004999567)	2.93941297709 (0.146282268195521)	-0.326423858724 (0.172697236713303)
snRNA.Antisense	2.44151813914 (0.671799092485737)	1.03259691769 (0.502650098787692)	-0.878505033042 (0.637835821337846)	-0.0057172953276 (0.628955289822375)	-1.84916993456 (0.00746292770039237)	5.08789997865 (0.447863338182954)	-1.9893351398 (0.0583249865724046)	1.85490123288 (0.168634355631304)	-1.04505740843 (0.263309674551267)	4.08863566267 (0.0116813054822112)	0.231142719209 (0.839378464573117)	0.155573580964 (0.187125860983426)	-0.257759946219 (0.652436182144225)	8.3268851865 (0.00126738713428144)	-1.70719449044 (0.154462424348782)	4.7877596437 (0.107781248661435)	-0.441712942783 (0.840124706010789)	0 (0)	0 (0)	0 (0)	-1.662464738 (0.0302971936656394)	8.87748817696 (0.000157903562946616)	-0.353442654933 (0.00942886660359973)	5.20237878668 (0.18018553500732)	-0.958816517793 (0.553959118107369)	2.33944114796 (0.642023932565837)	-0.936439440894 (0.999994471966)	6.42880637657 (0.0124347420478954)	-1.64939085067 (0.0351136435614704)	5.67027941712 (0.00171061578557107)	-1.12439495158 (0.0815753305876528)	1.84125785898 (0.512640697230933)	-1.64165734322 (0.13454011741683)	2.30476661772 (0.384829204717513)	2.77289609829 (0.846296843686952)	-0.877418876543 (0.689989948705496)	-0.938950489771 (0.559223944388666)	8.34302662096 (0.0866756762304585)	-0.408126535507 (0.823628303143247)	-0.292374860524 (0.479168958093573)	-1.32946852785 (0.191417119986243)	15.8580540044 (0.018710482270241)	1.4521845122 (0.955716715354029)	1.79688282444 (0.894449519792469)	-0.811865576955 (0.386065723582946)	8.64166426109 (0.210772474126704)	0.165931938742 (0.421224223540287)	1.84371361362 (0.363772392609649)	1.15158263421 (0.240938828843215)
srpRNA.Antisense	-0.473219740718 (0.709707102457136)	1.42490941274 (0.593976306535072)	-0.283267875224 (0.526422357590799)	0.057773176815 (0.786409797703948)	-0.86930833414 (0.642579277997846)	-0.446957804896 (0.823534284965135)	-1.29916011534 (0.481232804309281)	-0.231292082658 (0.505717159321201)	1.90371480385 (0.992768616038185)	1.58261780083 (0.617766990135068)	-1.0510231795 (0.684714695394747)	1.16658037546 (0.951455230087016)	-0.601851622137 (0.412272421607902)	5.47956834638 (0.0981531653540265)	-1.28656277186 (0.114160567102902)	0.838915431051 (0.880768764984905)	0 (0)	0 (0)	0 (0)	0 (0)	-0.447107451806 (0.999994471966)	6.57041525609 (0.733233462140992)	-0.567154302642 (0.798475628939402)	-1.2611828895 (0.99819610106341)	0.0544052501152 (0.955322767535152)	3.62656648475 (0.0393422859058864)	0.190716419484 (0.992768616038185)	0.159456651637 (0.406088215050185)	-1.03337061943 (0.808523147070433)	0.0911350669578 (0.282859939135628)	-0.933029301636 (0.408778196758143)	-0.948449965129 (0.958838993362852)	-0.849188760143 (0.315893097361478)	2.15806988925 (0.301392923168598)	-1.06738382154 (0.184465606337951)	-0.299793061828 (0.970640081469246)	1.1885858949 (0.922636207316068)	2.59102894754 (0.629170368336215)	0.543179998254 (0.284992793103041)	0.000892201972545 (0.769887578785333)	0.507391041015 (0.85170295289711)	6.01194480951 (0.280038612011214)	2.23793337514 (0.76522605554921)	1.35945219951 (0.769363962918452)	0.753454033278 (0.664162540657213)	14.7936394731 (0.0540679517941656)	-0.537671065711 (0.208844330322927)	-0.848906077361 (0.993111893130792)	-0.379024985528 (0.999994471966)
tRNA.Antisense	-0.75529846412 (0.453115144728061)	-0.436407655302 (0.912299577659412)	-0.105630520663 (0.732274749972314)	-0.59499707871 (0.745396269579731)	0.671832692036 (0.27748989273645)	-0.202656884394 (0.986269694815799)	-0.196114742979 (0.826869141447256)	-0.182905680599 (0.594596488196368)	4.68267857038 (0.106200149215068)	-0.211101694626 (0.280038612011214)	5.34039229093 (0.963335908820474)	2.74549215734 (0.978870101895072)	-0.482453568825 (0.976131425327971)	-0.47531205135 (0.999436600206421)	-0.254198088276 (0.818720572139069)	0.792216246556 (0.847386771800489)	0 (0)	0 (0)	0 (0)	0 (0)	-0.234871023388 (0.877234481372132)	-0.111318076774 (0.651316963734677)	-0.283726081516 (0.835967456890088)	-0.306786852047 (0.978346959543043)	-0.727374746164 (0.427023672278351)	0.199418179555 (0.671799092485737)	-0.185520638505 (0.187125860983426)	0.541741306581 (0.223145273654291)	-0.330046869445 (0.619523807315711)	-0.157059088207 (0.149657283793154)	0.27094320655 (0.663180076000929)	0.162766790489 (0.990216060066799)	-0.64317847066 (0.472919791467468)	-0.064430117039 (0.999436600206421)	0.703709073727 (0.970114973959569)	-0.76477350771 (0.225096234844593)	-0.633805193806 (0.582220335753616)	-0.351269980155 (0.729812294190123)	-0.408885685209 (0.999994471966)	1.65433694375 (0.448060043355703)	-0.685346131327 (0.021302980324101)	4.28539490069 (0.11339157253512)	0.66359318127 (0.239657010744943)	-0.687461724196 (0.0500337591138508)	-0.487064457369 (0.406066428463217)	-0.274047683064 (0.806564969679264)	-0.541296999195 (0.97470693000513)	-0.395422680226 (0.803544508288108)	-0.451106748045 (0.983095504711129)
[truncated: 79 more columns]

## Sheet: S10
Supplemental Table S10: DAVID analysis on the genes with the highest and lowest density in repeat elements
Category	Term	Count	%	Pvalue	Genes	List Total	Pop Hits	Pop Total	Fold Enrichment	Bonferroni	Benjamini	FDR
(A) Genes with high density in repeats
INTERPRO	IPR011993:Pleckstrin homology-like domain	132	4.43847	1.32063e-15	ENSG00000100077, ENSG00000141447, ENSG00000113319, ENSG00000075651, ENSG00000101333, ENSG00000110768, ENSG00000134215, ENSG00000137727, ENSG00000073712, ENSG00000124313, ENSG00000134318, ENSG00000196526, ENSG00000152104, ENSG00000063601, ENSG00000077420, ENSG00000066248, ENSG00000079156, ENSG00000152061, ENSG00000197943, ENSG00000153815, ENSG00000115290, ENSG00000129595, ENSG00000165322, ENSG0000…	2761	406	16821	1.98077	4.02745e-12	4.02745e-12	2.39808e-12
GOTERM_MF_FAT	GO:0016301~kinase activity	223	7.49832	7.92883e-14	ENSG00000067177, ENSG00000141639, ENSG00000100077, ENSG00000198909, ENSG00000154310, ENSG00000078142, ENSG00000110768, ENSG00000174808, ENSG00000101336, ENSG00000149269, ENSG00000147010, ENSG00000154027, ENSG00000134318, ENSG00000160584, ENSG00000104213, ENSG00000071909, ENSG00000171132, ENSG00000140795, ENSG00000188322, ENSG00000065243, ENSG00000120156, ENSG00000146872, ENSG00000006837, ENSG0000…	2274	877	14309	1.60002	1.82242e-10	1.82242e-10	1.38511e-10
GOTERM_MF_FAT	GO:0004672~protein kinase activity	171	5.74983	7.92915e-14	ENSG00000067177, ENSG00000141639, ENSG00000100077, ENSG00000169071, ENSG00000185483, ENSG00000198909, ENSG00000154310, ENSG00000078142, ENSG00000049323, ENSG00000095777, ENSG00000110768, ENSG00000101336, ENSG00000174808, ENSG00000149269, ENSG00000108950, ENSG00000138756, ENSG00000134318, ENSG00000160584, ENSG00000101266, ENSG00000204217, ENSG00000101265, ENSG00000198796, ENSG00000104213, ENSG0000…	2274	622	14309	1.72991	1.82242e-10	9.11208e-11	1.38511e-10
GOTERM_MF_FAT	GO:0032559~adenyl ribonucleotide binding	334	11.2307	8.03734e-14	ENSG00000141639, ENSG00000198909, ENSG00000146282, ENSG00000100077, ENSG00000176658, ENSG00000154310, ENSG00000078142, ENSG00000076242, ENSG00000090889, ENSG00000113448, ENSG00000100271, ENSG00000111331, ENSG00000159267, ENSG00000128833, ENSG00000197142, ENSG00000130377, ENSG00000101336, ENSG00000149269, ENSG00000103222, ENSG00000136492, ENSG00000134318, ENSG00000154027, ENSG00000160584, ENSG0000…	2274	1452	14309	1.44743	1.84794e-10	6.15979e-11	1.40443e-10
GOTERM_MF_FAT	GO:0030554~adenyl nucleotide binding	335	11.2643	1.39486e-13	ENSG00000141639, ENSG00000198909, ENSG00000146282, ENSG00000100077, ENSG00000176658, ENSG00000154310, ENSG00000078142, ENSG00000076242, ENSG00000090889, ENSG00000113448, ENSG00000100271, ENSG00000111331, ENSG00000159267, ENSG00000128833, ENSG00000197142, ENSG00000130377, ENSG00000101336, ENSG00000149269, ENSG00000103222, ENSG00000136492, ENSG00000134318, ENSG00000154027, ENSG00000160584, ENSG0000…	2274	1463	14309	1.44085	3.20582e-10	8.01454e-11	2.4365e-10
INTERPRO	IPR000719:Protein kinase, catalytic domain	139	4.67384	2.3928e-13	ENSG00000141639, ENSG00000169071, ENSG00000185483, ENSG00000198909, ENSG00000100077, ENSG00000154310, ENSG00000095777, ENSG00000101336, ENSG00000149269, ENSG00000138756, ENSG00000134318, ENSG00000160584, ENSG00000101266, ENSG00000204217, ENSG00000073803, ENSG00000071909, ENSG00000171132, ENSG00000140795, ENSG00000188322, ENSG00000112655, ENSG00000065243, ENSG00000145349, ENSG00000120156, ENSG0000…	2761	463	16821	1.82902	7.23262e-10	3.61631e-10	4.31188e-10
GOTERM_CC_FAT	GO:0045202~synapse	200	6.72495	2.87143e-13	ENSG00000102385, ENSG00000170579, ENSG00000126970, ENSG00000100678, ENSG00000101333, ENSG00000164318, ENSG00000139220, ENSG00000147010, ENSG00000131238, ENSG00000069188, ENSG00000075142, ENSG00000152910, ENSG00000138101, ENSG00000183783, ENSG00000198722, ENSG00000152818, ENSG00000141837, ENSG00000187672, ENSG00000171723, ENSG00000094755, ENSG00000089169, ENSG00000163697, ENSG00000169213, ENSG0000…	2302	727	13585	1.62349	3.13517e-10	3.13517e-10	4.587e-10
GOTERM_MF_FAT	GO:0016773~phosphotransferase activity, alcohol group as acceptor	194	6.5232	4.51584e-13	ENSG00000141639, ENSG00000067177, ENSG00000100077, ENSG00000198909, ENSG00000154310, ENSG00000078142, ENSG00000110768, ENSG00000174808, ENSG00000101336, ENSG00000149269, ENSG00000134318, ENSG00000160584, ENSG00000104213, ENSG00000071909, ENSG00000171132, ENSG00000140795, ENSG00000188322, ENSG00000065243, ENSG00000120156, ENSG00000146872, ENSG00000006837, ENSG00000069702, ENSG00000171435, ENSG0000…	2274	746	14309	1.63637	1.03832e-09	2.07663e-10	7.89147e-10
GOTERM_MF_FAT	GO:0004674~protein serine/threonine kinase activity	127	4.27034	7.1456e-13	ENSG00000067177, ENSG00000141639, ENSG00000198909, ENSG00000100077, ENSG00000154310, ENSG00000049323, ENSG00000095777, ENSG00000110768, ENSG00000149269, ENSG00000108950, ENSG00000138756, ENSG00000134318, ENSG00000160584, ENSG00000101266, ENSG00000204217, ENSG00000198796, ENSG00000071909, ENSG00000073803, ENSG00000140795, ENSG00000171132, ENSG00000156265, ENSG00000188322, ENSG00000065243, ENSG0000…	2274	429	14309	1.8628	1.64273e-09	2.73788e-10	1.2485e-09
GOTERM_MF_FAT	GO:0005524~ATP binding	323	10.8608	7.90128e-13	ENSG00000141639, ENSG00000198909, ENSG00000146282, ENSG00000100077, ENSG00000176658, ENSG00000154310, ENSG00000078142, ENSG00000076242, ENSG00000090889, ENSG00000100271, ENSG00000111331, ENSG00000159267, ENSG00000128833, ENSG00000197142, ENSG00000130377, ENSG00000101336, ENSG00000149269, ENSG00000103222, ENSG00000136492, ENSG00000134318, ENSG00000154027, ENSG00000160584, ENSG00000187527, ENSG0000…	2274	1417	14309	1.43434	1.81655e-09	2.59506e-10	1.38061e-09
GOTERM_CC_FAT	GO:0044456~synapse part	167	5.61533	1.25381e-12	ENSG00000185345, ENSG00000102385, ENSG00000170579, ENSG00000183023, ENSG00000126970, ENSG00000089250, ENSG00000100678, ENSG00000145864, ENSG00000101333, ENSG00000083635, ENSG00000124198, ENSG00000138758, ENSG00000119522, ENSG00000139220, ENSG00000131238, ENSG00000204217, ENSG00000163288, ENSG00000152578, ENSG00000150625, ENSG00000075142, ENSG00000115839, ENSG00000152910, ENSG00000183783, ENSG0000…	2302	585	13585	1.68467	1.36912e-09	6.84561e-10	2.00314e-09
GOTERM_BP_FAT	GO:0030030~cell projection organization	294	9.88568	1.5065e-12	ENSG00000171055, ENSG00000107736, ENSG00000074527, ENSG00000154310, ENSG00000075651, ENSG00000100271, ENSG00000134215, ENSG00000067208, ENSG00000170382, ENSG00000156687, ENSG00000149269, ENSG00000131374, ENSG00000187164, ENSG00000099204, ENSG00000133740, ENSG00000141646, ENSG00000080298, ENSG00000119685, ENSG00000107263, ENSG00000169126, ENSG00000006451, ENSG00000157851, ENSG00000158987, ENSG0000…	2498	1244	15419	1.45878	1.3638e-08	1.3638e-08	3.04599e-09
GOTERM_CC_FAT	GO:0098794~postsynapse	115	3.86685	2.27782e-12	ENSG00000102385, ENSG00000170579, ENSG00000183023, ENSG00000126970, ENSG00000089250, ENSG00000100678, ENSG00000145864, ENSG00000101333, ENSG00000124198, ENSG00000138758, ENSG00000163288, ENSG00000204217, ENSG00000152578, ENSG00000150625, ENSG00000075142, ENSG00000115839, ENSG00000183783, ENSG00000162946, ENSG00000151067, ENSG00000152818, ENSG00000117971, ENSG00000111886, ENSG00000171723, ENSG0000…	2302	359	13585	1.89042	2.48741e-09	8.29135e-10	3.63929e-09
INTERPRO	IPR017441:Protein kinase, ATP binding site	114	3.83322	2.50773e-12	ENSG00000141639, ENSG00000100077, ENSG00000154310, ENSG00000095777, ENSG00000101336, ENSG00000149269, ENSG00000134318, ENSG00000160584, ENSG00000101266, ENSG00000204217, ENSG00000071909, ENSG00000140795, ENSG00000171132, ENSG00000065243, ENSG00000145349, ENSG00000120156, ENSG00000146872, ENSG00000006837, ENSG00000104375, ENSG00000059758, ENSG00000180370, ENSG00000138669, ENSG00000007264, ENSG0000…	2761	365	16821	1.90282	7.58099e-09	2.527e-09	4.51952e-09
INTERPRO	IPR011009:Protein kinase-like domain	145	4.87559	2.60366e-12	ENSG00000141639, ENSG00000169071, ENSG00000185483, ENSG00000198909, ENSG00000100077, ENSG00000154310, ENSG00000078142, ENSG00000095777, ENSG00000101336, ENSG00000149269, ENSG00000138756, ENSG00000134318, ENSG00000160584, ENSG00000101266, ENSG00000204217, ENSG00000198796, ENSG00000073803, ENSG00000071909, ENSG00000171132, ENSG00000140795, ENSG00000188322, ENSG00000112655, ENSG00000065243, ENSG0000…	2761	504	16821	1.75276	7.87097e-09	1.96774e-09	4.69239e-09
INTERPRO	IPR000008:C2 calcium-dependent membrane targeting	61	2.05111	1.44905e-11	ENSG00000138193, ENSG00000116675, ENSG00000078142, ENSG00000108854, ENSG00000101098, ENSG00000113645, ENSG00000114805, ENSG00000101333, ENSG00000171862, ENSG00000155903, ENSG00000109452, ENSG00000198373, ENSG00000139151, ENSG00000081803, ENSG00000171132, ENSG00000175471, ENSG00000198722, ENSG00000197943, ENSG00000123124, ENSG00000065243, ENSG00000019505, ENSG00000121879, ENSG00000159842, ENSG0000…	2761	154	16821	2.41321	4.38048e-08	8.76097e-09	2.61149e-08
GOTERM_MF_FAT	GO:0032553~ribonucleotide binding	385	12.9455	2.25745e-11	ENSG00000141639, ENSG00000198909, ENSG00000100077, ENSG00000146282, ENSG00000176658, ENSG00000078142, ENSG00000090889, ENSG00000113448, ENSG00000100271, ENSG00000111331, ENSG00000128833, ENSG00000197142, ENSG00000101336, ENSG00000130377, ENSG00000054392, ENSG00000170289, ENSG00000103222, ENSG00000136492, ENSG00000160584, ENSG00000166833, ENSG00000140284, ENSG00000171132, ENSG00000183486, ENSG0000…	2274	1793	14309	1.35114	5.18988e-08	6.48735e-09	3.94441e-08
GOTERM_MF_FAT	GO:0032555~purine ribonucleotide binding	382	12.8447	2.93866e-11	ENSG00000141639, ENSG00000198909, ENSG00000146282, ENSG00000100077, ENSG00000176658, ENSG00000154310, ENSG00000078142, ENSG00000076242, ENSG00000090889, ENSG00000113448, ENSG00000100271, ENSG00000111331, ENSG00000159267, ENSG00000128833, ENSG00000197142, ENSG00000130377, ENSG00000101336, ENSG00000054392, ENSG00000170289, ENSG00000149269, ENSG00000103222, ENSG00000136492, ENSG00000134318, ENSG0000…	2274	1780	14309	1.3504	6.75598e-08	7.50664e-09	5.13468e-08
GOTERM_MF_FAT	GO:0017076~purine nucleotide binding	383	12.8783	5.34826e-11	ENSG00000141639, ENSG00000198909, ENSG00000146282, ENSG00000100077, ENSG00000176658, ENSG00000154310, ENSG00000078142, ENSG00000076242, ENSG00000090889, ENSG00000113448, ENSG00000100271, ENSG00000111331, ENSG00000159267, ENSG00000128833, ENSG00000197142, ENSG00000130377, ENSG00000101336, ENSG00000054392, ENSG00000170289, ENSG00000149269, ENSG00000103222, ENSG00000136492, ENSG00000134318, ENSG0000…	2274	1793	14309	1.34412	1.22956e-07	1.22956e-08	9.34493e-08
GOTERM_MF_FAT	GO:0001882~nucleoside binding	375	12.6093	9.49165e-11	ENSG00000141639, ENSG00000198909, ENSG00000146282, ENSG00000100077, ENSG00000176658, ENSG00000154310, ENSG00000078142, ENSG00000076242, ENSG00000090889, ENSG00000100271, ENSG00000111331, ENSG00000159267, ENSG00000128833, ENSG00000197142, ENSG00000130377, ENSG00000101336, ENSG00000054392, ENSG00000149269, ENSG00000103222, ENSG00000136492, ENSG00000134318, ENSG00000154027, ENSG00000160584, ENSG0000…	2274	1756	14309	1.34377	2.18213e-07	1.98376e-08	1.65846e-07
GOTERM_BP_FAT	GO:0000902~cell morphogenesis	274	9.21318	1.19682e-10	ENSG00000171055, ENSG00000074527, ENSG00000154310, ENSG00000100271, ENSG00000101336, ENSG00000067208, ENSG00000170382, ENSG00000156687, ENSG00000153774, ENSG00000149269, ENSG00000170615, ENSG00000187164, ENSG00000147010, ENSG00000131374, ENSG00000128585, ENSG00000099204, ENSG00000141646, ENSG00000080298, ENSG00000119685, ENSG00000169126, ENSG00000158985, ENSG00000146376, ENSG00000157851, ENSG0000…	2498	1185	15419	1.42724	1.08348e-06	5.41741e-07	2.41991e-07
GOTERM_MF_FAT	GO:0032549~ribonucleoside binding	372	12.5084	1.97769e-10	ENSG00000141639, ENSG00000198909, ENSG00000146282, ENSG00000100077, ENSG00000176658, ENSG00000154310, ENSG00000078142, ENSG00000076242, ENSG00000090889, ENSG00000100271, ENSG00000111331, ENSG00000159267, ENSG00000128833, ENSG00000197142, ENSG00000130377, ENSG00000101336, ENSG00000054392, ENSG00000149269, ENSG00000103222, ENSG00000136492, ENSG00000134318, ENSG00000154027, ENSG00000160584, ENSG0000…	2274	1749	14309	1.33836	4.5467e-07	3.78892e-08	3.45558e-07
GOTERM_MF_FAT	GO:0001883~purine nucleoside binding	372	12.5084	1.97769e-10	ENSG00000141639, ENSG00000198909, ENSG00000146282, ENSG00000100077, ENSG00000176658, ENSG00000154310, ENSG00000078142, ENSG00000076242, ENSG00000090889, ENSG00000100271, ENSG00000111331, ENSG00000159267, ENSG00000128833, ENSG00000197142, ENSG00000130377, ENSG00000101336, ENSG00000054392, ENSG00000149269, ENSG00000103222, ENSG00000136492, ENSG00000134318, ENSG00000154027, ENSG00000160584, ENSG0000…	2274	1749	14309	1.33836	4.5467e-07	3.78892e-08	3.45558e-07
GOTERM_MF_FAT	GO:0032550~purine ribonucleoside binding	371	12.4748	2.36761e-10	ENSG00000141639, ENSG00000198909, ENSG00000146282, ENSG00000100077, ENSG00000176658, ENSG00000154310, ENSG00000078142, ENSG00000076242, ENSG00000090889, ENSG00000100271, ENSG00000111331, ENSG00000159267, ENSG00000128833, ENSG00000197142, ENSG00000130377, ENSG00000101336, ENSG00000054392, ENSG00000149269, ENSG00000103222, ENSG00000136492, ENSG00000134318, ENSG00000154027, ENSG00000160584, ENSG0000…	2274	1746	14309	1.33705	5.44313e-07	4.18703e-08	4.13689e-07
GOTERM_MF_FAT	GO:0035639~purine ribonucleoside triphosphate binding	369	12.4075	3.02091e-10	ENSG00000141639, ENSG00000198909, ENSG00000146282, ENSG00000100077, ENSG00000176658, ENSG00000154310, ENSG00000078142, ENSG00000076242, ENSG00000090889, ENSG00000100271, ENSG00000111331, ENSG00000159267, ENSG00000128833, ENSG00000197142, ENSG00000130377, ENSG00000101336, ENSG00000054392, ENSG00000149269, ENSG00000103222, ENSG00000136492, ENSG00000134318, ENSG00000154027, ENSG00000160584, ENSG0000…	2274	1738	14309	1.33597	6.94508e-07	4.96077e-08	5.2784e-07
GOTERM_BP_FAT	GO:0032989~cellular component morphogenesis	287	9.6503	3.88383e-10	ENSG00000171055, ENSG00000074527, ENSG00000154310, ENSG00000100271, ENSG00000101336, ENSG00000067208, ENSG00000170382, ENSG00000156687, ENSG00000153774, ENSG00000149269, ENSG00000170615, ENSG00000147010, ENSG00000131374, ENSG00000187164, ENSG00000128585, ENSG00000099204, ENSG00000141646, ENSG00000080298, ENSG00000140795, ENSG00000119685, ENSG00000169126, ENSG00000158985, ENSG00000146376, ENSG0000…	2498	1266	15419	1.3993	3.51602e-06	1.17201e-06	7.85289e-07
INTERPRO	IPR001849:Pleckstrin homology domain	82	2.75723	1.01014e-09	ENSG00000107679, ENSG00000100077, ENSG00000147251, ENSG00000113319, ENSG00000141447, ENSG00000075651, ENSG00000114805, ENSG00000137727, ENSG00000134215, ENSG00000073712, ENSG00000155903, ENSG00000135605, ENSG00000124313, ENSG00000134318, ENSG00000156011, ENSG00000163947, ENSG00000196526, ENSG00000145819, ENSG00000081803, ENSG00000128805, ENSG00000067900, ENSG00000133789, ENSG00000135905, ENSG0000…	2761	256	16821	1.95146	3.05366e-06	5.08944e-07	1.82049e-06
GOTERM_MF_FAT	GO:0097367~carbohydrate derivative binding	433	14.5595	1.90685e-09	ENSG00000141639, ENSG00000198909, ENSG00000100077, ENSG00000146282, ENSG00000176658, ENSG00000078142, ENSG00000090889, ENSG00000113448, ENSG00000100271, ENSG00000111331, ENSG00000128833, ENSG00000205221, ENSG00000197142, ENSG00000101336, ENSG00000130377, ENSG00000054392, ENSG00000170289, ENSG00000103222, ENSG00000136492, ENSG00000160584, ENSG00000166833, ENSG00000140284, ENSG00000171132, ENSG0000…	2274	2124	14309	1.28278	4.38384e-06	2.92257e-07	3.33181e-06
GOTERM_BP_FAT	GO:0032990~cell part morphogenesis	189	6.35508	2.41698e-09	ENSG00000171055, ENSG00000125741, ENSG00000074527, ENSG00000162761, ENSG00000185345, ENSG00000111783, ENSG00000100271, ENSG00000182168, ENSG00000170382, ENSG00000156687, ENSG00000149269, ENSG00000187164, ENSG00000132561, ENSG00000135541, ENSG00000204217, ENSG00000099204, ENSG00000150625, ENSG00000141646, ENSG00000080298, ENSG00000119685, ENSG00000140937, ENSG00000066248, ENSG00000169126, ENSG0000…	2498	777	15419	1.50143	2.18807e-05	5.47022e-06	4.88701e-06
INTERPRO	IPR008271:Serine/threonine-protein kinase, active site	90	3.02623	2.70281e-09	ENSG00000141639, ENSG00000100077, ENSG00000154310, ENSG00000162409, ENSG00000138696, ENSG00000114670, ENSG00000107779, ENSG00000198586, ENSG00000125388, ENSG00000149269, ENSG00000138756, ENSG00000155111, ENSG00000134318, ENSG00000120539, ENSG00000160584, ENSG00000114124, ENSG00000101266, ENSG00000142875, ENSG00000152953, ENSG00000100030, ENSG00000075413, ENSG00000067900, ENSG00000169032, ENSG0000…	2761	296	16821	1.85241	8.17055e-06	1.16723e-06	4.87101e-06
GOTERM_BP_FAT	GO:0048858~cell projection morphogenesis	184	6.18695	4.21348e-09	ENSG00000171055, ENSG00000074527, ENSG00000162761, ENSG00000185345, ENSG00000111783, ENSG00000100271, ENSG00000182168, ENSG00000170382, ENSG00000156687, ENSG00000149269, ENSG00000187164, ENSG00000132561, ENSG00000135541, ENSG00000204217, ENSG00000099204, ENSG00000150625, ENSG00000141646, ENSG00000080298, ENSG00000119685, ENSG00000140937, ENSG00000066248, ENSG00000169126, ENSG00000162946, ENSG0000…	2498	757	15419	1.50033	3.81439e-05	7.62889e-06	8.51942e-06
GOTERM_CC_FAT	GO:0097458~neuron part	293	9.85205	8.78753e-09	ENSG00000171055, ENSG00000107736, ENSG00000176658, ENSG00000102385, ENSG00000170579, ENSG00000090889, ENSG00000184156, ENSG00000100678, ENSG00000101333, ENSG00000149269, ENSG00000170289, ENSG00000139220, ENSG00000147010, ENSG00000187164, ENSG00000131238, ENSG00000127928, ENSG00000075142, ENSG00000152910, ENSG00000183783, ENSG00000182674, ENSG00000198722, ENSG00000152818, ENSG00000157851, ENSG0000…	2302	1281	13585	1.34981	9.59594e-06	2.39899e-06	1.40398e-05
KEGG_PATHWAY	hsa05032:Morphine addiction	37	1.24412	2.12975e-08	ENSG00000168243, ENSG00000100077, ENSG00000113448, ENSG00000155897, ENSG00000112541, ENSG00000145864, ENSG00000184588, ENSG00000198873, ENSG00000125388, ENSG00000152270, ENSG00000171408, ENSG00000137486, ENSG00000151834, ENSG00000142875, ENSG00000163288, ENSG00000166501, ENSG00000205268, ENSG00000127928, ENSG00000176533, ENSG00000163485, ENSG00000112038, ENSG00000011677, ENSG00000115252, ENSG0000…	1025	89	6422	2.6047	6.13366e-06	6.13366e-06	2.82827e-05
INTERPRO	IPR016024:Armadillo-type fold	95	3.19435	2.30801e-08	ENSG00000118690, ENSG00000119698, ENSG00000132792, ENSG00000147251, ENSG00000139734, ENSG00000078142, ENSG00000198589, ENSG00000204764, ENSG00000138698, ENSG00000186432, ENSG00000111785, ENSG00000249961, ENSG00000167077, ENSG00000075151, ENSG00000124198, ENSG00000168038, ENSG00000120725, ENSG00000189079, ENSG00000188352, ENSG00000151779, ENSG00000172915, ENSG00000149262, ENSG00000143493, ENSG0000…	2761	331	16821	1.74856	6.97686e-05	8.72135e-06	4.1595e-05
GOTERM_MF_FAT	GO:0005216~ion channel activity	109	3.6651	3.65631e-08	ENSG00000138448, ENSG00000135643, ENSG00000184156, ENSG00000145864, ENSG00000137726, ENSG00000156113, ENSG00000170289, ENSG00000170615, ENSG00000117262, ENSG00000151572, ENSG00000185774, ENSG00000154118, ENSG00000163288, ENSG00000188092, ENSG00000152578, ENSG00000165995, ENSG00000150625, ENSG00000151067, ENSG00000182674, ENSG00000141837, ENSG00000186038, ENSG00000117971, ENSG00000165091, ENSG0000…	2274	412	14309	1.66475	8.4055e-05	5.25365e-06	6.38862e-05
GOTERM_CC_FAT	GO:0045211~postsynaptic membrane	66	2.21923	3.72184e-08	ENSG00000152208, ENSG00000102385, ENSG00000170579, ENSG00000126970, ENSG00000161681, ENSG00000145864, ENSG00000150672, ENSG00000171862, ENSG00000156011, ENSG00000151834, ENSG00000163288, ENSG00000182771, ENSG00000081803, ENSG00000183454, ENSG00000107864, ENSG00000152578, ENSG00000183783, ENSG00000162946, ENSG00000155511, ENSG00000152818, ENSG00000117971, ENSG00000111886, ENSG00000143786, ENSG0000…	2302	199	13585	1.95724	4.06417e-05	8.12847e-06	5.94635e-05
GOTERM_BP_FAT	GO:0034220~ion transmembrane transport	213	7.16207	3.82668e-08	ENSG00000080493, ENSG00000168079, ENSG00000184156, ENSG00000113448, ENSG00000100678, ENSG00000137726, ENSG00000170289, ENSG00000103222, ENSG00000170615, ENSG00000117262, ENSG00000184544, ENSG00000151572, ENSG00000163681, ENSG00000154118, ENSG00000187527, ENSG00000165995, ENSG00000075142, ENSG00000151577, ENSG00000171132, ENSG00000182674, ENSG00000152818, ENSG00000197943, ENSG00000141837, ENSG0000…	2498	929	15419	1.41523	0.00034637	5.77366e-05	7.73735e-05
GOTERM_BP_FAT	GO:0030031~cell projection assembly	108	3.63147	3.86268e-08	ENSG00000154310, ENSG00000111783, ENSG00000075651, ENSG00000100271, ENSG00000067208, ENSG00000134215, ENSG00000131374, ENSG00000187164, ENSG00000135541, ENSG00000099204, ENSG00000150625, ENSG00000080298, ENSG00000119685, ENSG00000006451, ENSG00000162946, ENSG00000169126, ENSG00000158987, ENSG00000157796, ENSG00000157423, ENSG00000173226, ENSG00000152582, ENSG00000102302, ENSG00000130638, ENSG0000…	2498	400	15419	1.66659	0.000349627	4.99542e-05	7.81013e-05
KEGG_PATHWAY	hsa04724:Glutamatergic synapse	42	1.41224	4.9514e-08	ENSG00000100077, ENSG00000168243, ENSG00000149403, ENSG00000075651, ENSG00000170579, ENSG00000155897, ENSG00000161681, ENSG00000120910, ENSG00000101333, ENSG00000110436, ENSG00000103942, ENSG00000125675, ENSG00000179603, ENSG00000171189, ENSG00000142875, ENSG00000100030, ENSG00000157388, ENSG00000150995, ENSG00000166501, ENSG00000183454, ENSG00000152578, ENSG00000127928, ENSG00000176533, ENSG0000…	1025	111	6422	2.37068	1.42599e-05	7.12999e-06	6.57536e-05
GOTERM_MF_FAT	GO:0022836~gated channel activity	90	3.02623	6.92251e-08	ENSG00000152208, ENSG00000006116, ENSG00000138448, ENSG00000135643, ENSG00000184156, ENSG00000080709, ENSG00000108684, ENSG00000145864, ENSG00000047617, ENSG00000156113, ENSG00000197043, ENSG00000170289, ENSG00000171365, ENSG00000183960, ENSG00000117262, ENSG00000151572, ENSG00000185774, ENSG00000154118, ENSG00000151834, ENSG00000163288, ENSG00000182771, ENSG00000188092, ENSG00000100433, ENSG0000…	2274	325	14309	1.74252	0.000159136	9.36163e-06	0.000120956
GOTERM_CC_FAT	GO:0097060~synaptic membrane	80	2.68998	8.31401e-08	ENSG00000152208, ENSG00000064692, ENSG00000102385, ENSG00000170579, ENSG00000126970, ENSG00000161681, ENSG00000101098, ENSG00000145864, ENSG00000150672, ENSG00000171862, ENSG00000119522, ENSG00000156011, ENSG00000151834, ENSG00000179603, ENSG00000163288, ENSG00000182771, ENSG00000081803, ENSG00000183454, ENSG00000107864, ENSG00000152578, ENSG00000152910, ENSG00000183783, ENSG00000005884, ENSG0000…	2302	263	13585	1.7951	9.07848e-05	1.51314e-05	0.000132832
GOTERM_MF_FAT	GO:0036094~small molecule binding	473	15.9045	8.32038e-08	ENSG00000141639, ENSG00000198909, ENSG00000100077, ENSG00000146282, ENSG00000176658, ENSG00000138385, ENSG00000078142, ENSG00000141447, ENSG00000090889, ENSG00000113448, ENSG00000100271, ENSG00000111331, ENSG00000128833, ENSG00000197142, ENSG00000130377, ENSG00000101336, ENSG00000054392, ENSG00000170289, ENSG00000103222, ENSG00000136492, ENSG00000121957, ENSG00000160584, ENSG00000166833, ENSG0000…	2274	2418	14309	1.2309	0.000191267	1.06269e-05	0.000145381
INTERPRO	IPR001452:Src homology-3 domain	66	2.21923	9.12674e-08	ENSG00000198853, ENSG00000109686, ENSG00000161681, ENSG00000134215, ENSG00000101336, ENSG00000150672, ENSG00000147010, ENSG00000135605, ENSG00000174705, ENSG00000135541, ENSG00000145819, ENSG00000165995, ENSG00000066248, ENSG00000151491, ENSG00000147044, ENSG00000150526, ENSG00000197943, ENSG00000137478, ENSG00000007237, ENSG00000165322, ENSG00000087589, ENSG00000154127, ENSG00000060709, ENSG0000…	2761	209	16821	1.9239	0.000275863	3.06553e-05	0.000164483
GOTERM_MF_FAT	GO:0000166~nucleotide binding	442	14.8621	1.03319e-07	ENSG00000141639, ENSG00000198909, ENSG00000100077, ENSG00000146282, ENSG00000176658, ENSG00000138385, ENSG00000078142, ENSG00000090889, ENSG00000113448, ENSG00000100271, ENSG00000111331, ENSG00000128833, ENSG00000197142, ENSG00000101336, ENSG00000130377, ENSG00000054392, ENSG00000170289, ENSG00000103222, ENSG00000136492, ENSG00000121957, ENSG00000160584, ENSG00000166833, ENSG00000140284, ENSG0000…	2274	2241	14309	1.24108	0.000237502	1.25015e-05	0.000180527
GOTERM_MF_FAT	GO:1901265~nucleoside phosphate binding	442	14.8621	1.07378e-07	ENSG00000141639, ENSG00000198909, ENSG00000100077, ENSG00000146282, ENSG00000176658, ENSG00000138385, ENSG00000078142, ENSG00000090889, ENSG00000113448, ENSG00000100271, ENSG00000111331, ENSG00000128833, ENSG00000197142, ENSG00000101336, ENSG00000130377, ENSG00000054392, ENSG00000170289, ENSG00000103222, ENSG00000136492, ENSG00000121957, ENSG00000160584, ENSG00000166833, ENSG00000140284, ENSG0000…	2274	2242	14309	1.24052	0.000246831	1.2343e-05	0.00018762
GOTERM_BP_FAT	GO:0070588~calcium ion transmembrane transport	75	2.52186	1.13002e-07	ENSG00000006116, ENSG00000138448, ENSG00000110218, ENSG00000113448, ENSG00000183023, ENSG00000089250, ENSG00000100678, ENSG00000184588, ENSG00000143183, ENSG00000186439, ENSG00000184544, ENSG00000154118, ENSG00000017260, ENSG00000109689, ENSG00000183454, ENSG00000166473, ENSG00000150625, ENSG00000165995, ENSG00000075142, ENSG00000171132, ENSG00000130038, ENSG00000151067, ENSG00000197943, ENSG0000…	2498	253	15419	1.8298	0.00102249	0.000127868	0.000228484
GOTERM_MF_FAT	GO:0022838~substrate-specific channel activity	110	3.69872	1.39846e-07	ENSG00000138448, ENSG00000135643, ENSG00000184156, ENSG00000145864, ENSG00000137726, ENSG00000156113, ENSG00000170289, ENSG00000170615, ENSG00000117262, ENSG00000151572, ENSG00000185774, ENSG00000154118, ENSG00000163288, ENSG00000188092, ENSG00000152578, ENSG00000165995, ENSG00000150625, ENSG00000151067, ENSG00000182674, ENSG00000141837, ENSG00000186038, ENSG00000117971, ENSG00000165091, ENSG0000…	2274	427	14309	1.621	0.000321454	1.53097e-05	0.00024435
KEGG_PATHWAY	hsa04012:ErbB signaling pathway	35	1.17687	1.4332e-07	ENSG00000138798, ENSG00000109339, ENSG00000097007, ENSG00000158092, ENSG00000148660, ENSG00000174808, ENSG00000157764, ENSG00000149269, ENSG00000187840, ENSG00000163235, ENSG00000143322, ENSG00000178568, ENSG00000100030, ENSG00000077264, ENSG00000166501, ENSG00000101349, ENSG00000169032, ENSG00000141736, ENSG00000117020, ENSG00000158458, ENSG00000169752, ENSG00000157168, ENSG00000197943, ENSG0000…	1025	87	6422	2.52055	4.12754e-05	1.37587e-05	0.000190327
GOTERM_MF_FAT	GO:0015085~calcium ion transmembrane transporter activity	44	1.47949	2.04627e-07	ENSG00000083067, ENSG00000006116, ENSG00000138448, ENSG00000110218, ENSG00000183023, ENSG00000100678, ENSG00000198216, ENSG00000143183, ENSG00000158683, ENSG00000149488, ENSG00000154118, ENSG00000118762, ENSG00000157388, ENSG00000017260, ENSG00000109689, ENSG00000150995, ENSG00000174343, ENSG00000183454, ENSG00000166473, ENSG00000165995, ENSG00000150625, ENSG00000064270, ENSG00000196277, ENSG0000…	2274	124	14309	2.2328	0.000470327	2.13833e-05	0.000357541
GOTERM_BP_FAT	GO:0048666~neuron development	207	6.96032	2.47601e-07	ENSG00000171055, ENSG00000107736, ENSG00000074527, ENSG00000154310, ENSG00000170382, ENSG00000156687, ENSG00000149269, ENSG00000187164, ENSG00000131238, ENSG00000127928, ENSG00000141646, ENSG00000107263, ENSG00000157851, ENSG00000141837, ENSG00000165091, ENSG00000198513, ENSG00000156052, ENSG00000171533, ENSG00000132359, ENSG00000142599, ENSG00000123268, ENSG00000130638, ENSG00000116641, ENSG0000…	2498	919	15419	1.39033	0.00223902	0.000249028	0.000500636
KEGG_PATHWAY	hsa04728:Dopaminergic synapse	44	1.47949	4.09839e-07	ENSG00000154001, ENSG00000109339, ENSG00000168243, ENSG00000118260, ENSG00000120910, ENSG00000101333, ENSG00000148660, ENSG00000144285, ENSG00000073711, ENSG00000125675, ENSG00000105568, ENSG00000142875, ENSG00000157388, ENSG00000150995, ENSG00000166501, ENSG00000183454, ENSG00000152578, ENSG00000127928, ENSG00000176533, ENSG00000151577, ENSG00000117020, ENSG00000151067, ENSG00000155511, ENSG0000…	1025	127	6422	2.17068	0.000118027	2.9508e-05	0.000544257
GOTERM_BP_FAT	GO:0035556~intracellular signal transduction	498	16.7451	4.11032e-07	ENSG00000141639, ENSG00000126070, ENSG00000198909, ENSG00000078142, ENSG00000075651, ENSG00000113448, ENSG00000166432, ENSG00000136167, ENSG00000101333, ENSG00000137727, ENSG00000136492, ENSG00000117262, ENSG00000005981, ENSG00000124313, ENSG00000118495, ENSG00000141646, ENSG00000171132, ENSG00000006451, ENSG00000144118, ENSG00000186153, ENSG00000166444, ENSG00000198722, ENSG00000197943, ENSG0000…	2498	2540	15419	1.21021	0.00371415	0.000372038	0.000831081
GOTERM_BP_FAT	GO:0043547~positive regulation of GTPase activity	142	4.77471	5.95718e-07	ENSG00000138193, ENSG00000113319, ENSG00000111785, ENSG00000067208, ENSG00000134215, ENSG00000137727, ENSG00000174808, ENSG00000124198, ENSG00000119522, ENSG00000242247, ENSG00000131374, ENSG00000124313, ENSG00000148484, ENSG00000143344, ENSG00000182732, ENSG00000115839, ENSG00000174373, ENSG00000158458, ENSG00000107263, ENSG00000066248, ENSG00000169752, ENSG00000152061, ENSG00000166444, ENSG0000…	2498	591	15419	1.48308	0.00537852	0.000490156	0.0012045
GOTERM_BP_FAT	GO:0006811~ion transport	295	9.9193	7.07485e-07	ENSG00000107736, ENSG00000080493, ENSG00000168079, ENSG00000113448, ENSG00000184156, ENSG00000100678, ENSG00000137726, ENSG00000170289, ENSG00000139220, ENSG00000103222, ENSG00000170615, ENSG00000117262, ENSG00000184544, ENSG00000151572, ENSG00000112394, ENSG00000154118, ENSG00000163681, ENSG00000187527, ENSG00000140284, ENSG00000133742, ENSG00000165995, ENSG00000075142, ENSG00000151577, ENSG0000…	2498	1408	15419	1.29325	0.0063844	0.000533596	0.00143049
GOTERM_CC_FAT	GO:0098590~plasma membrane region	209	7.02757	8.29523e-07	ENSG00000173040, ENSG00000080493, ENSG00000154310, ENSG00000176658, ENSG00000102385, ENSG00000170579, ENSG00000075651, ENSG00000126970, ENSG00000113448, ENSG00000113645, ENSG00000136167, ENSG00000101336, ENSG00000149269, ENSG00000103222, ENSG00000170615, ENSG00000112394, ENSG00000124212, ENSG00000127928, ENSG00000152910, ENSG00000183783, ENSG00000152818, ENSG00000158987, ENSG00000120156, ENSG0000…	2302	905	13585	1.36286	0.000905429	0.000129397	0.00132531
GOTERM_MF_FAT	GO:0008092~cytoskeletal protein binding	181	6.08608	9.98479e-07	ENSG00000185345, ENSG00000176658, ENSG00000095777, ENSG00000090889, ENSG00000183023, ENSG00000163995, ENSG00000136167, ENSG00000128833, ENSG00000064042, ENSG00000156113, ENSG00000124198, ENSG00000170615, ENSG00000187164, ENSG00000196526, ENSG00000099204, ENSG00000166974, ENSG00000165995, ENSG00000151276, ENSG00000071909, ENSG00000183486, ENSG00000171132, ENSG00000162946, ENSG00000006451, ENSG0000…	2274	814	14309	1.39918	0.00229287	9.97996e-05	0.00174461
GOTERM_BP_FAT	GO:0030029~actin filament-based process	152	5.11096	1.05157e-06	ENSG00000185345, ENSG00000154310, ENSG00000113448, ENSG00000163995, ENSG00000136167, ENSG00000064042, ENSG00000101336, ENSG00000149269, ENSG00000187164, ENSG00000124313, ENSG00000134318, ENSG00000128585, ENSG00000165995, ENSG00000075142, ENSG00000164144, ENSG00000171132, ENSG00000140795, ENSG00000006451, ENSG00000120756, ENSG00000106789, ENSG00000073910, ENSG00000151067, ENSG00000163092, ENSG0000…	2498	648	15419	1.44788	0.00947466	0.000732027	0.00212619
GOTERM_MF_FAT	GO:0005262~calcium channel activity	39	1.31137	1.1433e-06	ENSG00000083067, ENSG00000006116, ENSG00000138448, ENSG00000110218, ENSG00000198216, ENSG00000143183, ENSG00000158683, ENSG00000149488, ENSG00000154118, ENSG00000118762, ENSG00000157388, ENSG00000109689, ENSG00000150995, ENSG00000174343, ENSG00000183454, ENSG00000166473, ENSG00000165995, ENSG00000150625, ENSG00000196277, ENSG00000185052, ENSG00000182389, ENSG00000112038, ENSG00000149596, ENSG0000…	2274	110	14309	2.23095	0.00262499	0.000109512	0.00199765
KEGG_PATHWAY	hsa04713:Circadian entrainment	35	1.17687	1.21606e-06	ENSG00000168243, ENSG00000118260, ENSG00000155897, ENSG00000089250, ENSG00000101333, ENSG00000148660, ENSG00000198929, ENSG00000125675, ENSG00000142875, ENSG00000100784, ENSG00000100030, ENSG00000157388, ENSG00000150995, ENSG00000166501, ENSG00000183454, ENSG00000152578, ENSG00000127928, ENSG00000176533, ENSG00000198838, ENSG00000151067, ENSG00000155511, ENSG00000185532, ENSG00000273079, ENSG0000…	1025	94	6422	2.33285	0.000350165	7.00428e-05	0.0016149
GOTERM_BP_FAT	GO:0031175~neuron projection development	177	5.95158	1.25739e-06	ENSG00000171055, ENSG00000074527, ENSG00000162761, ENSG00000185345, ENSG00000154310, ENSG00000145868, ENSG00000144724, ENSG00000182168, ENSG00000170382, ENSG00000156687, ENSG00000149269, ENSG00000187164, ENSG00000132561, ENSG00000204217, ENSG00000150625, ENSG00000141646, ENSG00000107263, ENSG00000140937, ENSG00000066248, ENSG00000162946, ENSG00000073910, ENSG00000112655, ENSG00000141837, ENSG0000…	2498	780	15419	1.40069	0.0113186	0.000812751	0.00254234
GOTERM_CC_FAT	GO:0034702~ion channel complex	79	2.65636	1.74808e-06	ENSG00000152208, ENSG00000006116, ENSG00000135643, ENSG00000161681, ENSG00000113448, ENSG00000184156, ENSG00000089250, ENSG00000145864, ENSG00000184588, ENSG00000047617, ENSG00000174469, ENSG00000156113, ENSG00000150672, ENSG00000186439, ENSG00000185774, ENSG00000151834, ENSG00000163288, ENSG00000183454, ENSG00000152578, ENSG00000165995, ENSG00000174453, ENSG00000151067, ENSG00000182674, ENSG0000…	2302	277	13585	1.68307	0.00190708	0.000238584	0.00279285
GOTERM_BP_FAT	GO:1902589~single-organism organelle organization	316	10.6254	1.76479e-06	ENSG00000154310, ENSG00000076242, ENSG00000090889, ENSG00000100271, ENSG00000163995, ENSG00000136167, ENSG00000101336, ENSG00000134215, ENSG00000149269, ENSG00000254093, ENSG00000187164, ENSG00000121957, ENSG00000124313, ENSG00000134318, ENSG00000128585, ENSG00000099204, ENSG00000136874, ENSG00000143952, ENSG00000080298, ENSG00000144535, ENSG00000140795, ENSG00000171132, ENSG00000119685, ENSG0000…	2498	1539	15419	1.2674	0.0158497	0.00106454	0.00356825
GOTERM_BP_FAT	GO:0031344~regulation of cell projection organization	132	4.43847	1.82006e-06	ENSG00000185345, ENSG00000154310, ENSG00000145868, ENSG00000144724, ENSG00000075651, ENSG00000067208, ENSG00000187164, ENSG00000131374, ENSG00000204217, ENSG00000150625, ENSG00000107263, ENSG00000066248, ENSG00000162946, ENSG00000006451, ENSG00000120756, ENSG00000112655, ENSG00000141837, ENSG00000163291, ENSG00000103528, ENSG00000101144, ENSG00000132359, ENSG00000123268, ENSG00000213023, ENSG0000…	2498	551	15419	1.47872	0.016342	0.00102928	0.00368
KEGG_PATHWAY	hsa04014:Ras signaling pathway	63	2.11836	2.08796e-06	ENSG00000138798, ENSG00000138193, ENSG00000138308, ENSG00000168243, ENSG00000113319, ENSG00000075651, ENSG00000116473, ENSG00000149269, ENSG00000148680, ENSG00000155903, ENSG00000143344, ENSG00000170962, ENSG00000142875, ENSG00000100030, ENSG00000117215, ENSG00000183454, ENSG00000127928, ENSG00000169032, ENSG00000117020, ENSG00000152689, ENSG00000006451, ENSG00000144118, ENSG00000197943, ENSG0000…	1025	220	6422	1.79417	0.000601152	0.000100217	0.00277273
GOTERM_BP_FAT	GO:0043087~regulation of GTPase activity	150	5.04371	2.09046e-06	ENSG00000138193, ENSG00000113319, ENSG00000111785, ENSG00000134215, ENSG00000137727, ENSG00000067208, ENSG00000174808, ENSG00000124198, ENSG00000119522, ENSG00000242247, ENSG00000131374, ENSG00000124313, ENSG00000148484, ENSG00000143344, ENSG00000182732, ENSG00000115839, ENSG00000174373, ENSG00000158458, ENSG00000107263, ENSG00000066248, ENSG00000169752, ENSG00000152061, ENSG00000166444, ENSG0000…	2498	645	15419	1.43547	0.018747	0.00111261	0.00422671
GOTERM_BP_FAT	GO:0007010~cytoskeleton organization	233	7.83457	2.49158e-06	ENSG00000154310, ENSG00000076242, ENSG00000090889, ENSG00000100271, ENSG00000163995, ENSG00000136167, ENSG00000101336, ENSG00000149269, ENSG00000187164, ENSG00000147010, ENSG00000121957, ENSG00000124313, ENSG00000134318, ENSG00000128585, ENSG00000099204, ENSG00000143952, ENSG00000171132, ENSG00000140795, ENSG00000119685, ENSG00000006451, ENSG00000169126, ENSG00000106789, ENSG00000163092, ENSG0000…	2498	1088	15419	1.32188	0.0223038	0.00125234	0.00503773
GOTERM_BP_FAT	GO:0055085~transmembrane transport	267	8.97781	2.51383e-06	ENSG00000080493, ENSG00000168079, ENSG00000113448, ENSG00000184156, ENSG00000100678, ENSG00000137726, ENSG00000170289, ENSG00000103222, ENSG00000170615, ENSG00000117262, ENSG00000184544, ENSG00000151572, ENSG00000112394, ENSG00000154118, ENSG00000163681, ENSG00000187527, ENSG00000165995, ENSG00000075142, ENSG00000106771, ENSG00000151577, ENSG00000146477, ENSG00000171132, ENSG00000182674, ENSG0000…	2498	1274	15419	1.29362	0.0225007	0.00119706	0.00508271
INTERPRO	IPR019748:FERM central domain	23	0.773369	2.62637e-06	ENSG00000172159, ENSG00000162434, ENSG00000152767, ENSG00000079819, ENSG00000088179, ENSG00000095203, ENSG00000159023, ENSG00000151474, ENSG00000101311, ENSG00000169933, ENSG00000120899, ENSG00000073712, ENSG00000054690, ENSG00000147234, ENSG00000170324, ENSG00000129595, ENSG00000171877, ENSG00000114541, ENSG00000163629, ENSG00000152104, ENSG00000169398, ENSG00000139926, ENSG00000088367	2761	49	16821	2.85968	0.00790809	0.000793638	0.00473315
INTERPRO	IPR000299:FERM domain	23	0.773369	2.62637e-06	ENSG00000172159, ENSG00000162434, ENSG00000152767, ENSG00000079819, ENSG00000088179, ENSG00000095203, ENSG00000159023, ENSG00000151474, ENSG00000169933, ENSG00000120899, ENSG00000073712, ENSG00000054690, ENSG00000147234, ENSG00000170324, ENSG00000129595, ENSG00000171877, ENSG00000114541, ENSG00000163629, ENSG00000152104, ENSG00000169398, ENSG00000139926, ENSG00000174226, ENSG00000088367	2761	49	16821	2.85968	0.00790809	0.000793638	0.00473315
GOTERM_MF_FAT	GO:0005096~GTPase activator activity	70	2.35373	2.73663e-06	ENSG00000138698, ENSG00000111785, ENSG00000137727, ENSG00000134215, ENSG00000067208, ENSG00000109680, ENSG00000155903, ENSG00000131374, ENSG00000242247, ENSG00000145819, ENSG00000105738, ENSG00000128805, ENSG00000182732, ENSG00000115839, ENSG00000174373, ENSG00000011454, ENSG00000152689, ENSG00000152061, ENSG00000204634, ENSG00000146376, ENSG00000159842, ENSG00000136111, ENSG00000167037, ENSG0000…	2274	254	14309	1.73414	0.00627177	0.000251629	0.00478156
GOTERM_BP_FAT	GO:0098660~inorganic ion transmembrane transport	159	5.34633	3.30472e-06	ENSG00000080493, ENSG00000138448, ENSG00000135643, ENSG00000168079, ENSG00000183023, ENSG00000184156, ENSG00000113448, ENSG00000089250, ENSG00000100678, ENSG00000145864, ENSG00000156113, ENSG00000170289, ENSG00000144290, ENSG00000170615, ENSG00000184544, ENSG00000151572, ENSG00000154118, ENSG00000185774, ENSG00000163681, ENSG00000186334, ENSG00000163288, ENSG00000150625, ENSG00000165995, ENSG0000…	2498	697	15419	1.40808	0.0294746	0.00149477	0.00668175
GOTERM_MF_FAT	GO:0072509~divalent inorganic cation transmembrane transporter activity	51	1.71486	3.40489e-06	ENSG00000006116, ENSG00000138448, ENSG00000110218, ENSG00000183023, ENSG00000100678, ENSG00000143183, ENSG00000154118, ENSG00000017260, ENSG00000109689, ENSG00000183454, ENSG00000166473, ENSG00000165995, ENSG00000150625, ENSG00000151067, ENSG00000164756, ENSG00000136052, ENSG00000141837, ENSG00000165091, ENSG00000163293, ENSG00000156026, ENSG00000198626, ENSG00000083067, ENSG00000198216, ENSG0000…	2274	167	14309	1.92164	0.0077973	0.000301026	0.00594915
GOTERM_BP_FAT	GO:0036211~protein modification process	676	22.7303	3.47078e-06	ENSG00000119698, ENSG00000141639, ENSG00000067177, ENSG00000100077, ENSG00000198909, ENSG00000078142, ENSG00000113448, ENSG00000100271, ENSG00000110768, ENSG00000101336, ENSG00000183580, ENSG00000054392, ENSG00000033011, ENSG00000166439, ENSG00000054277, ENSG00000111339, ENSG00000005981, ENSG00000160584, ENSG00000104219, ENSG00000159495, ENSG00000159593, ENSG00000152104, ENSG00000063601, ENSG0000…	2498	3621	15419	1.15234	0.0309326	0.00149512	0.00701751
GOTERM_BP_FAT	GO:0006464~cellular protein modification process	676	22.7303	3.47078e-06	ENSG00000119698, ENSG00000141639, ENSG00000067177, ENSG00000100077, ENSG00000198909, ENSG00000078142, ENSG00000113448, ENSG00000100271, ENSG00000110768, ENSG00000101336, ENSG00000183580, ENSG00000054392, ENSG00000033011, ENSG00000166439, ENSG00000054277, ENSG00000111339, ENSG00000005981, ENSG00000160584, ENSG00000104219, ENSG00000159495, ENSG00000159593, ENSG00000152104, ENSG00000063601, ENSG0000…	2498	3621	15419	1.15234	0.0309326	0.00149512	0.00701751
INTERPRO	IPR019749:Band 4.1 domain	23	0.773369	3.9661e-06	ENSG00000172159, ENSG00000162434, ENSG00000152767, ENSG00000079819, ENSG00000088179, ENSG00000095203, ENSG00000159023, ENSG00000151474, ENSG00000101311, ENSG00000169933, ENSG00000120899, ENSG00000073712, ENSG00000054690, ENSG00000147234, ENSG00000170324, ENSG00000129595, ENSG00000171877, ENSG00000114541, ENSG00000163629, ENSG00000152104, ENSG00000169398, ENSG00000139926, ENSG00000088367	2761	50	16821	2.80248	0.0119179	0.00108936	0.00714748
GOTERM_CC_FAT	GO:0031252~cell leading edge	92	3.09348	3.99822e-06	ENSG00000107679, ENSG00000138448, ENSG00000176658, ENSG00000169744, ENSG00000113645, ENSG00000061676, ENSG00000136167, ENSG00000174469, ENSG00000149269, ENSG00000073712, ENSG00000187164, ENSG00000141376, ENSG00000128585, ENSG00000099204, ENSG00000067900, ENSG00000169604, ENSG00000115935, ENSG00000133789, ENSG00000077420, ENSG00000188158, ENSG00000157168, ENSG00000155511, ENSG00000197635, ENSG0000…	2302	343	13585	1.58288	0.00435654	0.000485	0.00638772
GOTERM_CC_FAT	GO:0034704~calcium channel complex	27	0.907868	4.30234e-06	ENSG00000006116, ENSG00000182389, ENSG00000107745, ENSG00000165487, ENSG00000198838, ENSG00000151067, ENSG00000113448, ENSG00000089250, ENSG00000184588, ENSG00000198929, ENSG00000141837, ENSG00000145349, ENSG00000198216, ENSG00000186439, ENSG00000151320, ENSG00000158683, ENSG00000133962, ENSG00000072315, ENSG00000156026, ENSG00000179397, ENSG00000198626, ENSG00000157388, ENSG00000198363, ENSG0000…	2302	63	13585	2.52917	0.00468714	0.000469706	0.00687358
GOTERM_BP_FAT	GO:0060271~cilium morphogenesis	66	2.21923	4.58743e-06	ENSG00000110318, ENSG00000155875, ENSG00000111783, ENSG00000100271, ENSG00000122507, ENSG00000135541, ENSG00000099204, ENSG00000135407, ENSG00000118997, ENSG00000119977, ENSG00000174799, ENSG00000080298, ENSG00000119685, ENSG00000169126, ENSG00000162946, ENSG00000157796, ENSG00000157423, ENSG00000083535, ENSG00000148180, ENSG00000173226, ENSG00000152582, ENSG00000197702, ENSG00000130638, ENSG0000…	2498	234	15419	1.74097	0.0406796	0.00188595	0.00927514
GOTERM_MF_FAT	GO:0015267~channel activity	110	3.69872	4.65611e-06	ENSG00000138448, ENSG00000135643, ENSG00000184156, ENSG00000145864, ENSG00000137726, ENSG00000156113, ENSG00000170289, ENSG00000170615, ENSG00000117262, ENSG00000151572, ENSG00000185774, ENSG00000154118, ENSG00000163288, ENSG00000188092, ENSG00000152578, ENSG00000165995, ENSG00000150625, ENSG00000151067, ENSG00000182674, ENSG00000141837, ENSG00000186038, ENSG00000117971, ENSG00000165091, ENSG0000…	2274	457	14309	1.51459	0.0106473	0.000396381	0.00813524
GOTERM_MF_FAT	GO:0022803~passive transmembrane transporter activity	110	3.69872	5.19525e-06	ENSG00000138448, ENSG00000135643, ENSG00000184156, ENSG00000145864, ENSG00000137726, ENSG00000156113, ENSG00000170289, ENSG00000170615, ENSG00000117262, ENSG00000151572, ENSG00000185774, ENSG00000154118, ENSG00000163288, ENSG00000188092, ENSG00000152578, ENSG00000165995, ENSG00000150625, ENSG00000151067, ENSG00000182674, ENSG00000141837, ENSG00000186038, ENSG00000117971, ENSG00000165091, ENSG0000…	2274	458	14309	1.51128	0.0118729	0.000426477	0.0090772
GOTERM_MF_FAT	GO:0008047~enzyme activator activity	109	3.6651	5.85967e-06	ENSG00000111785, ENSG00000099968, ENSG00000067208, ENSG00000134215, ENSG00000137727, ENSG00000108950, ENSG00000172175, ENSG00000136770, ENSG00000242247, ENSG00000131374, ENSG00000182732, ENSG00000115839, ENSG00000174373, ENSG00000171132, ENSG00000152061, ENSG00000150526, ENSG00000146376, ENSG00000164327, ENSG00000170946, ENSG00000156052, ENSG00000104375, ENSG00000165322, ENSG00000132359, ENSG0000…	2274	454	14309	1.51074	0.0133811	0.000464424	0.010238
GOTERM_BP_FAT	GO:0048699~generation of neurons	269	9.04506	5.88719e-06	ENSG00000171055, ENSG00000107736, ENSG00000074527, ENSG00000154310, ENSG00000126970, ENSG00000134115, ENSG00000170382, ENSG00000156687, ENSG00000149269, ENSG00000187164, ENSG00000131238, ENSG00000069188, ENSG00000127928, ENSG00000141646, ENSG00000151577, ENSG00000107263, ENSG00000157851, ENSG00000141837, ENSG00000165091, ENSG00000198513, ENSG00000156052, ENSG00000171533, ENSG00000142599, ENSG0000…	2498	1298	15419	1.27921	0.0519015	0.00231457	0.0119029
GOTERM_BP_FAT	GO:0030036~actin cytoskeleton organization	126	4.23672	6.31824e-06	ENSG00000185345, ENSG00000154310, ENSG00000163995, ENSG00000136167, ENSG00000064042, ENSG00000101336, ENSG00000149269, ENSG00000187164, ENSG00000124313, ENSG00000134318, ENSG00000128585, ENSG00000164144, ENSG00000140795, ENSG00000171132, ENSG00000006451, ENSG00000120756, ENSG00000073910, ENSG00000106789, ENSG00000163092, ENSG00000112655, ENSG00000146376, ENSG00000120156, ENSG00000164327, ENSG0000…	2498	533	15419	1.45917	0.0555941	0.00238046	0.0127744
GOTERM_MF_FAT	GO:0098772~molecular function regulator	268	9.01143	6.47329e-06	ENSG00000119698, ENSG00000174808, ENSG00000134215, ENSG00000137727, ENSG00000067208, ENSG00000114166, ENSG00000136770, ENSG00000254093, ENSG00000131374, ENSG00000242247, ENSG00000121957, ENSG00000124313, ENSG00000075142, ENSG00000171132, ENSG00000107263, ENSG00000166444, ENSG00000150526, ENSG00000146376, ENSG00000158987, ENSG00000120156, ENSG00000164327, ENSG00000137936, ENSG00000165322, ENSG0000…	2274	1320	14309	1.27756	0.014772	0.000495948	0.0113101
GOTERM_BP_FAT	GO:0098662~inorganic cation transmembrane transport	141	4.74109	6.7058e-06	ENSG00000080493, ENSG00000138448, ENSG00000135643, ENSG00000168079, ENSG00000184156, ENSG00000183023, ENSG00000113448, ENSG00000089250, ENSG00000100678, ENSG00000156113, ENSG00000170289, ENSG00000144290, ENSG00000184544, ENSG00000154118, ENSG00000185774, ENSG00000163681, ENSG00000186334, ENSG00000150625, ENSG00000165995, ENSG00000075142, ENSG00000151577, ENSG00000162753, ENSG00000171132, ENSG0000…	2498	611	15419	1.42443	0.0589018	0.00242536	0.0135579
GOTERM_BP_FAT	GO:0030001~metal ion transport	174	5.85071	6.92992e-06	ENSG00000107736, ENSG00000080493, ENSG00000138448, ENSG00000135643, ENSG00000168079, ENSG00000183023, ENSG00000184156, ENSG00000113448, ENSG00000089250, ENSG00000100678, ENSG00000156113, ENSG00000170289, ENSG00000144290, ENSG00000184544, ENSG00000154118, ENSG00000185774, ENSG00000163681, ENSG00000158865, ENSG00000150625, ENSG00000165995, ENSG00000075142, ENSG00000151577, ENSG00000162753, ENSG0000…	2498	785	15419	1.36818	0.0608094	0.00241005	0.014011
GOTERM_CC_FAT	GO:0030054~cell junction	283	9.5158	6.94818e-06	ENSG00000102385, ENSG00000170579, ENSG00000126970, ENSG00000100678, ENSG00000136167, ENSG00000101336, ENSG00000164318, ENSG00000149269, ENSG00000187164, ENSG00000147010, ENSG00000164934, ENSG00000069188, ENSG00000159261, ENSG00000152910, ENSG00000183783, ENSG00000006451, ENSG00000116117, ENSG00000163092, ENSG00000198722, ENSG00000124831, ENSG00000152818, ENSG00000065243, ENSG00000146376, ENSG0000…	2302	1321	13585	1.26426	0.00755873	0.00068953	0.0111005
GOTERM_MF_FAT	GO:0030695~GTPase regulator activity	75	2.52186	7.24776e-06	ENSG00000138698, ENSG00000111785, ENSG00000067208, ENSG00000137727, ENSG00000134215, ENSG00000109680, ENSG00000155903, ENSG00000131374, ENSG00000242247, ENSG00000121957, ENSG00000145819, ENSG00000105738, ENSG00000128805, ENSG00000182732, ENSG00000115839, ENSG00000174373, ENSG00000011454, ENSG00000152689, ENSG00000152061, ENSG00000204634, ENSG00000146376, ENSG00000159842, ENSG00000136111, ENSG0000…	2274	285	14309	1.6559	0.0165246	0.00053736	0.0126631
GOTERM_BP_FAT	GO:0016311~dephosphorylation	100	3.36247	7.72581e-06	ENSG00000119698, ENSG00000176658, ENSG00000163082, ENSG00000144724, ENSG00000158161, ENSG00000073711, ENSG00000109452, ENSG00000144677, ENSG00000134318, ENSG00000064655, ENSG00000063601, ENSG00000152104, ENSG00000196090, ENSG00000111696, ENSG00000178425, ENSG00000013293, ENSG00000156475, ENSG00000060709, ENSG00000154127, ENSG00000137074, ENSG00000203805, ENSG00000134324, ENSG00000163590, ENSG0000…	2498	403	15419	1.53165	0.0675521	0.00258709	0.01562
GOTERM_MF_FAT	GO:0005261~cation channel activity	77	2.58911	8.4807e-06	ENSG00000006116, ENSG00000138448, ENSG00000135643, ENSG00000110218, ENSG00000184156, ENSG00000080709, ENSG00000108684, ENSG00000156113, ENSG00000170289, ENSG00000143183, ENSG00000183960, ENSG00000185774, ENSG00000154118, ENSG00000100433, ENSG00000109689, ENSG00000183454, ENSG00000166473, ENSG00000150625, ENSG00000165995, ENSG00000151067, ENSG00000182674, ENSG00000185313, ENSG00000186038, ENSG0000…	2274	296	14309	1.63688	0.0193084	0.000609102	0.0148172
GOTERM_BP_FAT	GO:0098655~cation transmembrane transport	153	5.14459	9.67521e-06	ENSG00000080493, ENSG00000138448, ENSG00000135643, ENSG00000168079, ENSG00000183023, ENSG00000184156, ENSG00000113448, ENSG00000089250, ENSG00000100678, ENSG00000156113, ENSG00000170289, ENSG00000144290, ENSG00000184544, ENSG00000154118, ENSG00000185774, ENSG00000163681, ENSG00000186334, ENSG00000187527, ENSG00000150625, ENSG00000165995, ENSG00000075142, ENSG00000151577, ENSG00000162753, ENSG0000…	2498	678	15419	1.39292	0.0838636	0.00312333	0.0195609
GOTERM_MF_FAT	GO:0005543~phospholipid binding	86	2.89173	9.94765e-06	ENSG00000048471, ENSG00000141447, ENSG00000075651, ENSG00000130338, ENSG00000159023, ENSG00000157077, ENSG00000197043, ENSG00000119522, ENSG00000073712, ENSG00000135605, ENSG00000174705, ENSG00000156011, ENSG00000145819, ENSG00000064652, ENSG00000154217, ENSG00000174226, ENSG00000164144, ENSG00000175471, ENSG00000189403, ENSG00000033327, ENSG00000019505, ENSG00000139144, ENSG00000103528, ENSG0000…	2274	342	14309	1.58231	0.0226102	0.000692783	0.01738
GOTERM_BP_FAT	GO:0006793~phosphorus metabolic process	555	18.6617	1.11859e-05	ENSG00000119698, ENSG00000141639, ENSG00000067177, ENSG00000198909, ENSG00000100077, ENSG00000176658, ENSG00000163082, ENSG00000078142, ENSG00000075651, ENSG00000109390, ENSG00000113448, ENSG00000110768, ENSG00000101333, ENSG00000101336, ENSG00000160584, ENSG00000152104, ENSG00000063601, ENSG00000141646, ENSG00000171132, ENSG00000144118, ENSG00000166444, ENSG00000196090, ENSG00000197943, ENSG0000…	2498	2939	15419	1.16562	0.0963076	0.00348585	0.0226148
GOTERM_BP_FAT	GO:0007169~transmembrane receptor protein tyrosine kinase signaling pathway	144	4.84196	1.17175e-05	ENSG00000138193, ENSG00000169071, ENSG00000185483, ENSG00000138448, ENSG00000144724, ENSG00000101336, ENSG00000134215, ENSG00000174808, ENSG00000149269, ENSG00000147010, ENSG00000134318, ENSG00000170962, ENSG00000135541, ENSG00000204217, ENSG00000101265, ENSG00000076641, ENSG00000104213, ENSG00000158458, ENSG00000107263, ENSG00000066248, ENSG00000169752, ENSG00000196090, ENSG00000120156, ENSG0000…	2498	633	15419	1.40418	0.100646	0.00352972	0.0236895
INTERPRO	IPR011989:Armadillo-like helical	61	2.05111	1.17521e-05	ENSG00000119698, ENSG00000132792, ENSG00000118690, ENSG00000204764, ENSG00000138698, ENSG00000186432, ENSG00000111785, ENSG00000167077, ENSG00000249961, ENSG00000124198, ENSG00000168038, ENSG00000120725, ENSG00000188352, ENSG00000172915, ENSG00000149262, ENSG00000143493, ENSG00000115970, ENSG00000132842, ENSG00000189350, ENSG00000077327, ENSG00000169126, ENSG00000100280, ENSG00000144712, ENSG0000…	2761	214	16821	1.73661	0.0349031	0.00295618	0.0211775
GOTERM_BP_FAT	GO:0098916~anterograde trans-synaptic signaling	134	4.50572	1.30547e-05	ENSG00000185345, ENSG00000135643, ENSG00000170579, ENSG00000184156, ENSG00000100678, ENSG00000145864, ENSG00000139220, ENSG00000148680, ENSG00000124313, ENSG00000131238, ENSG00000154118, ENSG00000139910, ENSG00000152578, ENSG00000165995, ENSG00000152910, ENSG00000115839, ENSG00000151577, ENSG00000171132, ENSG00000198722, ENSG00000164270, ENSG00000141837, ENSG00000186038, ENSG00000117971, ENSG0000…	2498	582	15419	1.42117	0.111468	0.00380516	0.0263926
GOTERM_BP_FAT	GO:0007268~chemical synaptic transmission	134	4.50572	1.30547e-05	ENSG00000185345, ENSG00000135643, ENSG00000170579, ENSG00000184156, ENSG00000100678, ENSG00000145864, ENSG00000139220, ENSG00000148680, ENSG00000124313, ENSG00000131238, ENSG00000154118, ENSG00000139910, ENSG00000152578, ENSG00000165995, ENSG00000152910, ENSG00000115839, ENSG00000151577, ENSG00000171132, ENSG00000198722, ENSG00000164270, ENSG00000141837, ENSG00000186038, ENSG00000117971, ENSG0000…	2498	582	15419	1.42117	0.111468	0.00380516	0.0263926
GOTERM_BP_FAT	GO:0099537~trans-synaptic signaling	134	4.50572	1.30547e-05	ENSG00000185345, ENSG00000135643, ENSG00000170579, ENSG00000184156, ENSG00000100678, ENSG00000145864, ENSG00000139220, ENSG00000148680, ENSG00000124313, ENSG00000131238, ENSG00000154118, ENSG00000139910, ENSG00000152578, ENSG00000165995, ENSG00000152910, ENSG00000115839, ENSG00000151577, ENSG00000171132, ENSG00000198722, ENSG00000164270, ENSG00000141837, ENSG00000186038, ENSG00000117971, ENSG0000…	2498	582	15419	1.42117	0.111468	0.00380516	0.0263926
GOTERM_BP_FAT	GO:0099536~synaptic signaling	134	4.50572	1.30547e-05	ENSG00000185345, ENSG00000135643, ENSG00000170579, ENSG00000184156, ENSG00000100678, ENSG00000145864, ENSG00000139220, ENSG00000148680, ENSG00000124313, ENSG00000131238, ENSG00000154118, ENSG00000139910, ENSG00000152578, ENSG00000165995, ENSG00000152910, ENSG00000115839, ENSG00000151577, ENSG00000171132, ENSG00000198722, ENSG00000164270, ENSG00000141837, ENSG00000186038, ENSG00000117971, ENSG0000…	2498	582	15419	1.42117	0.111468	0.00380516	0.0263926
GOTERM_BP_FAT	GO:0006816~calcium ion transport	89	2.9926	1.35108e-05	ENSG00000138798, ENSG00000006116, ENSG00000107736, ENSG00000138448, ENSG00000110218, ENSG00000113448, ENSG00000183023, ENSG00000089250, ENSG00000100678, ENSG00000184588, ENSG00000197043, ENSG00000176273, ENSG00000143183, ENSG00000186439, ENSG00000184544, ENSG00000154118, ENSG00000139151, ENSG00000036828, ENSG00000017260, ENSG00000109689, ENSG00000183454, ENSG00000166473, ENSG00000150625, ENSG0000…	2498	353	15419	1.55625	0.11513	0.00381502	0.0273146
GOTERM_BP_FAT	GO:0006796~phosphate-containing compound metabolic process	553	18.5945	1.37923e-05	ENSG00000119698, ENSG00000141639, ENSG00000067177, ENSG00000198909, ENSG00000100077, ENSG00000176658, ENSG00000163082, ENSG00000078142, ENSG00000109390, ENSG00000113448, ENSG00000110768, ENSG00000101333, ENSG00000101336, ENSG00000160584, ENSG00000152104, ENSG00000063601, ENSG00000141646, ENSG00000171132, ENSG00000144118, ENSG00000166444, ENSG00000196090, ENSG00000197943, ENSG00000156671, ENSG0000…	2498	2933	15419	1.1638	0.117382	0.00377657	0.0278836
GOTERM_MF_FAT	GO:0005085~guanyl-nucleotide exchange factor activity	77	2.58911	1.41643e-05	ENSG00000138798, ENSG00000138193, ENSG00000147251, ENSG00000113319, ENSG00000116473, ENSG00000111785, ENSG00000134215, ENSG00000174808, ENSG00000124198, ENSG00000119522, ENSG00000124313, ENSG00000156011, ENSG00000143344, ENSG00000163947, ENSG00000183454, ENSG00000175984, ENSG00000115839, ENSG00000135905, ENSG00000158458, ENSG00000107263, ENSG00000066248, ENSG00000152689, ENSG00000169752, ENSG0000…	2274	300	14309	1.61506	0.0320395	0.000957306	0.0247462
GOTERM_MF_FAT	GO:0042578~phosphoric ester hydrolase activity	89	2.9926	1.56162e-05	ENSG00000138193, ENSG00000116675, ENSG00000163082, ENSG00000088179, ENSG00000144724, ENSG00000075651, ENSG00000113448, ENSG00000120910, ENSG00000132323, ENSG00000184588, ENSG00000114805, ENSG00000101333, ENSG00000158161, ENSG00000171862, ENSG00000240891, ENSG00000175354, ENSG00000109452, ENSG00000144677, ENSG00000064655, ENSG00000139151, ENSG00000036828, ENSG00000152104, ENSG00000063601, ENSG0000…	2274	361	14309	1.55132	0.0352652	0.00102525	0.0272825
GOTERM_MF_FAT	GO:0046873~metal ion transmembrane transporter activity	99	3.32885	1.57859e-05	ENSG00000080493, ENSG00000138448, ENSG00000135643, ENSG00000184156, ENSG00000183023, ENSG00000100678, ENSG00000156113, ENSG00000170289, ENSG00000185774, ENSG00000154118, ENSG00000165995, ENSG00000150625, ENSG00000162753, ENSG00000151067, ENSG00000182674, ENSG00000141837, ENSG00000165091, ENSG00000115616, ENSG00000163293, ENSG00000106688, ENSG00000185760, ENSG00000070729, ENSG00000095209, ENSG0000…	2274	412	14309	1.51202	0.0356415	0.00100761	0.027579
INTERPRO	IPR001202:WW domain	22	0.739744	1.58005e-05	ENSG00000187391, ENSG00000138411, ENSG00000137693, ENSG00000102385, ENSG00000108854, ENSG00000186153, ENSG00000113645, ENSG00000152818, ENSG00000123124, ENSG00000169933, ENSG00000166263, ENSG00000002746, ENSG00000007237, ENSG00000165322, ENSG00000049759, ENSG00000198373, ENSG00000145703, ENSG00000198947, ENSG00000166689, ENSG00000163697, ENSG00000018408, ENSG00000151276	2761	50	16821	2.68064	0.0466425	0.00366751	0.0284719
GOTERM_MF_FAT	GO:0008066~glutamate receptor activity	15	0.504371	1.60345e-05	ENSG00000152208, ENSG00000196277, ENSG00000149403, ENSG00000155511, ENSG00000273079, ENSG00000120899, ENSG00000125675, ENSG00000179603, ENSG00000171189, ENSG00000182771, ENSG00000168959, ENSG00000198822, ENSG00000183454, ENSG00000152578, ENSG00000198785	2274	27	14309	3.4958	0.0361925	0.00099582	0.0280132
GOTERM_MF_FAT	GO:0005509~calcium ion binding	150	5.04371	1.60465e-05	ENSG00000107736, ENSG00000138308, ENSG00000165105, ENSG00000049323, ENSG00000183023, ENSG00000136167, ENSG00000079689, ENSG00000101333, ENSG00000164318, ENSG00000073711, ENSG00000132561, ENSG00000185774, ENSG00000075142, ENSG00000111885, ENSG00000140937, ENSG00000038295, ENSG00000119681, ENSG00000120756, ENSG00000130038, ENSG00000183690, ENSG00000141837, ENSG00000141314, ENSG00000103528, ENSG0000…	2274	681	14309	1.386	0.036219	0.000970349	0.0280341
KEGG_PATHWAY	hsa04020:Calcium signaling pathway	51	1.71486	1.90224e-05	ENSG00000138193, ENSG00000067177, ENSG00000183023, ENSG00000100678, ENSG00000089250, ENSG00000120910, ENSG00000101333, ENSG00000148680, ENSG00000170425, ENSG00000044446, ENSG00000142875, ENSG00000139151, ENSG00000109689, ENSG00000183454, ENSG00000140795, ENSG00000151067, ENSG00000115353, ENSG00000115252, ENSG00000197943, ENSG00000152495, ENSG00000164270, ENSG00000141837, ENSG00000145349, ENSG0000…	1025	177	6422	1.80527	0.00546353	0.000782339	0.0252585
GOTERM_MF_FAT	GO:0004702~receptor signaling protein serine/threonine kinase activity	30	1.00874	2.08262e-05	ENSG00000109339, ENSG00000141639, ENSG00000198909, ENSG00000171094, ENSG00000154310, ENSG00000138696, ENSG00000197442, ENSG00000107779, ENSG00000157764, ENSG00000092969, ENSG00000137601, ENSG00000149269, ENSG00000204217, ENSG00000100030, ENSG00000077264, ENSG00000101349, ENSG00000169032, ENSG00000073803, ENSG00000108984, ENSG00000006432, ENSG00000135090, ENSG00000156265, ENSG00000130669, ENSG0000…	2274	84	14309	2.2473	0.0467518	0.00122694	0.0363831
GOTERM_BP_FAT	GO:0006470~protein dephosphorylation	66	2.21923	2.30706e-05	ENSG00000119698, ENSG00000116675, ENSG00000088179, ENSG00000144724, ENSG00000120910, ENSG00000132323, ENSG00000158161, ENSG00000171862, ENSG00000073711, ENSG00000175354, ENSG00000144959, ENSG00000144677, ENSG00000134318, ENSG00000120539, ENSG00000064655, ENSG00000063601, ENSG00000152104, ENSG00000067900, ENSG00000133789, ENSG00000196090, ENSG00000151490, ENSG00000102043, ENSG00000138814, ENSG0000…	2498	245	15419	1.66281	0.188491	0.00612412	0.0466371
INTERPRO	IPR018980:FERM, C-terminal PH-like domain	15	0.504371	2.35454e-05	ENSG00000172159, ENSG00000152767, ENSG00000079819, ENSG00000088179, ENSG00000095203, ENSG00000159023, ENSG00000151474, ENSG00000170324, ENSG00000129595, ENSG00000171877, ENSG00000114541, ENSG00000163629, ENSG00000152104, ENSG00000139926, ENSG00000088367	2761	27	16821	3.38464	0.0687045	0.00507129	0.0424252
GOTERM_BP_FAT	GO:0022008~neurogenesis	280	9.41493	2.47516e-05	ENSG00000171055, ENSG00000107736, ENSG00000074527, ENSG00000154310, ENSG00000126970, ENSG00000134115, ENSG00000100678, ENSG00000170382, ENSG00000156687, ENSG00000149269, ENSG00000187164, ENSG00000131238, ENSG00000069188, ENSG00000127928, ENSG00000141646, ENSG00000151577, ENSG00000107263, ENSG00000157851, ENSG00000141837, ENSG00000165091, ENSG00000198513, ENSG00000156052, ENSG00000171533, ENSG0000…	2498	1384	15419	1.24878	0.200748	0.0063818	0.0500344
GOTERM_BP_FAT	GO:0030182~neuron differentiation	242	8.13719	2.47844e-05	ENSG00000171055, ENSG00000107736, ENSG00000074527, ENSG00000154310, ENSG00000126970, ENSG00000134115, ENSG00000170382, ENSG00000156687, ENSG00000149269, ENSG00000187164, ENSG00000131238, ENSG00000069188, ENSG00000127928, ENSG00000141646, ENSG00000107263, ENSG00000157851, ENSG00000141837, ENSG00000165091, ENSG00000198513, ENSG00000156052, ENSG00000171533, ENSG00000142599, ENSG00000132359, ENSG0000…	2498	1173	15419	1.27345	0.200985	0.00621327	0.0501007
INTERPRO	IPR000961:AGC-kinase, C-terminal	23	0.773369	2.51755e-05	ENSG00000171132, ENSG00000117020, ENSG00000100077, ENSG00000104205, ENSG00000185532, ENSG00000086015, ENSG00000065243, ENSG00000198873, ENSG00000125388, ENSG00000270024, ENSG00000134318, ENSG00000069020, ENSG00000120539, ENSG00000114124, ENSG00000143776, ENSG00000100784, ENSG00000142875, ENSG00000166501, ENSG00000177189, ENSG00000067900, ENSG00000138669, ENSG00000154229, ENSG00000118515	2761	55	16821	2.54771	0.0732826	0.00506092	0.0453617
GOTERM_CC_FAT	GO:0043005~neuron projection	205	6.89307	3.13767e-05	ENSG00000171055, ENSG00000176658, ENSG00000102385, ENSG00000090889, ENSG00000184156, ENSG00000100678, ENSG00000101333, ENSG00000149269, ENSG00000187164, ENSG00000147010, ENSG00000131238, ENSG00000075142, ENSG00000152910, ENSG00000182674, ENSG00000198722, ENSG00000152818, ENSG00000157851, ENSG00000141837, ENSG00000198513, ENSG00000156052, ENSG00000187672, ENSG00000132359, ENSG00000171723, ENSG0000…	2302	932	13585	1.29805	0.0336835	0.00285125	0.0501184
GOTERM_MF_FAT	GO:0003779~actin binding	92	3.09348	3.23927e-05	ENSG00000139734, ENSG00000185345, ENSG00000176658, ENSG00000095777, ENSG00000110218, ENSG00000122786, ENSG00000163995, ENSG00000128833, ENSG00000159023, ENSG00000136167, ENSG00000064042, ENSG00000156113, ENSG00000197893, ENSG00000187164, ENSG00000196526, ENSG00000129170, ENSG00000099204, ENSG00000135407, ENSG00000169604, ENSG00000165995, ENSG00000115935, ENSG00000071909, ENSG00000171132, ENSG0000…	2274	383	14309	1.5115	0.0717666	0.00186007	0.0565842
GOTERM_BP_FAT	GO:0023051~regulation of signaling	551	18.5272	3.28925e-05	ENSG00000126070, ENSG00000198909, ENSG00000113448, ENSG00000197142, ENSG00000137726, ENSG00000137727, ENSG00000136492, ENSG00000147010, ENSG00000117262, ENSG00000124313, ENSG00000141646, ENSG00000127928, ENSG00000121210, ENSG00000152910, ENSG00000080298, ENSG00000183783, ENSG00000171132, ENSG00000186153, ENSG00000166444, ENSG00000198722, ENSG00000100281, ENSG00000101938, ENSG00000146376, ENSG0000…	2498	2945	15419	1.15486	0.257536	0.00801582	0.0664858
KEGG_PATHWAY	hsa04360:Axon guidance	39	1.31137	3.29076e-05	ENSG00000148948, ENSG00000074527, ENSG00000097007, ENSG00000163995, ENSG00000120910, ENSG00000158092, ENSG00000182168, ENSG00000136040, ENSG00000154928, ENSG00000156687, ENSG00000187122, ENSG00000149269, ENSG00000133216, ENSG00000134318, ENSG00000065320, ENSG00000187323, ENSG00000100030, ENSG00000077264, ENSG00000099204, ENSG00000196935, ENSG00000101096, ENSG00000173210, ENSG00000067900, ENSG0000…	1025	125	6422	1.95479	0.00943277	0.00118399	0.0436918
GOTERM_BP_FAT	GO:0048812~neuron projection morphogenesis	119	4.00134	3.51452e-05	ENSG00000171055, ENSG00000162761, ENSG00000074527, ENSG00000185345, ENSG00000182168, ENSG00000170382, ENSG00000156687, ENSG00000149269, ENSG00000187164, ENSG00000132561, ENSG00000204217, ENSG00000141646, ENSG00000150625, ENSG00000140937, ENSG00000066248, ENSG00000162946, ENSG00000141837, ENSG00000157851, ENSG00000162849, ENSG00000198513, ENSG00000103528, ENSG00000101144, ENSG00000171533, ENSG0000…	2498	515	15419	1.42628	0.272524	0.00833806	0.0710377
GOTERM_BP_FAT	GO:0070838~divalent metal ion transport	97	3.2616	3.5334e-05	ENSG00000138798, ENSG00000006116, ENSG00000107736, ENSG00000138448, ENSG00000110218, ENSG00000113448, ENSG00000183023, ENSG00000089250, ENSG00000100678, ENSG00000184588, ENSG00000197043, ENSG00000186439, ENSG00000176273, ENSG00000143183, ENSG00000184544, ENSG00000154118, ENSG00000139151, ENSG00000036828, ENSG00000017260, ENSG00000109689, ENSG00000183454, ENSG00000166473, ENSG00000150625, ENSG0000…	2498	402	15419	1.48939	0.273767	0.00816862	0.0714192
GOTERM_MF_FAT	GO:0022824~transmitter-gated ion channel activity	16	0.537996	3.75149e-05	ENSG00000152208, ENSG00000145888, ENSG00000149403, ENSG00000155511, ENSG00000101958, ENSG00000273079, ENSG00000120899, ENSG00000125675, ENSG00000151834, ENSG00000163288, ENSG00000171189, ENSG00000182771, ENSG00000174343, ENSG00000183454, ENSG00000152578, ENSG00000198785	2274	32	14309	3.14622	0.0826337	0.00210141	0.065529
GOTERM_MF_FAT	GO:0022835~transmitter-gated channel activity	16	0.537996	3.75149e-05	ENSG00000152208, ENSG00000145888, ENSG00000149403, ENSG00000155511, ENSG00000101958, ENSG00000273079, ENSG00000120899, ENSG00000125675, ENSG00000151834, ENSG00000163288, ENSG00000171189, ENSG00000182771, ENSG00000174343, ENSG00000183454, ENSG00000152578, ENSG00000198785	2274	32	14309	3.14622	0.0826337	0.00210141	0.065529
GOTERM_BP_FAT	GO:0006812~cation transport	198	6.6577	3.84128e-05	ENSG00000107736, ENSG00000080493, ENSG00000168079, ENSG00000184156, ENSG00000113448, ENSG00000100678, ENSG00000170289, ENSG00000184544, ENSG00000163681, ENSG00000154118, ENSG00000187527, ENSG00000165995, ENSG00000075142, ENSG00000151577, ENSG00000171132, ENSG00000146477, ENSG00000047457, ENSG00000182674, ENSG00000152818, ENSG00000197943, ENSG00000141837, ENSG00000186038, ENSG00000165091, ENSG0000…	2498	938	15419	1.30295	0.29373	0.00865625	0.0776399
GOTERM_CC_FAT	GO:1902495~transmembrane transporter complex	82	2.75723	3.95334e-05	ENSG00000152208, ENSG00000006116, ENSG00000135643, ENSG00000161681, ENSG00000113448, ENSG00000184156, ENSG00000089250, ENSG00000145864, ENSG00000184588, ENSG00000047617, ENSG00000174469, ENSG00000156113, ENSG00000150672, ENSG00000170289, ENSG00000186439, ENSG00000185774, ENSG00000151834, ENSG00000163288, ENSG00000183454, ENSG00000152578, ENSG00000165995, ENSG00000174453, ENSG00000151067, ENSG0000…	2302	314	13585	1.54113	0.0422527	0.00331536	0.0631434
INTERPRO	IPR018979:FERM, N-terminal	15	0.504371	3.99895e-05	ENSG00000172159, ENSG00000152767, ENSG00000079819, ENSG00000088179, ENSG00000095203, ENSG00000159023, ENSG00000151474, ENSG00000170324, ENSG00000129595, ENSG00000171877, ENSG00000114541, ENSG00000163629, ENSG00000152104, ENSG00000139926, ENSG00000088367	2761	28	16821	3.26376	0.113869	0.00752719	0.0720447
GOTERM_BP_FAT	GO:0032409~regulation of transporter activity	55	1.84936	4.23326e-05	ENSG00000006116, ENSG00000161681, ENSG00000113448, ENSG00000089250, ENSG00000184588, ENSG00000186439, ENSG00000154118, ENSG00000198373, ENSG00000163681, ENSG00000109689, ENSG00000118507, ENSG00000148175, ENSG00000165995, ENSG00000075142, ENSG00000132170, ENSG00000151577, ENSG00000171132, ENSG00000153721, ENSG00000130038, ENSG00000152818, ENSG00000197943, ENSG00000145349, ENSG00000143786, ENSG0000…	2498	197	15419	1.7233	0.318354	0.00930389	0.0855594
GOTERM_BP_FAT	GO:0051056~regulation of small GTPase mediated signal transduction	74	2.48823	4.49673e-05	ENSG00000138193, ENSG00000113319, ENSG00000134215, ENSG00000137727, ENSG00000124198, ENSG00000119522, ENSG00000072422, ENSG00000155903, ENSG00000124313, ENSG00000156011, ENSG00000163947, ENSG00000145819, ENSG00000128805, ENSG00000105738, ENSG00000174373, ENSG00000005884, ENSG00000118193, ENSG00000107263, ENSG00000066248, ENSG00000139725, ENSG00000157168, ENSG00000036257, ENSG00000146376, ENSG0000…	2498	289	15419	1.58051	0.334421	0.00964599	0.0908823
GOTERM_BP_FAT	GO:0072511~divalent inorganic cation transport	97	3.2616	4.79539e-05	ENSG00000138798, ENSG00000006116, ENSG00000107736, ENSG00000138448, ENSG00000110218, ENSG00000113448, ENSG00000183023, ENSG00000089250, ENSG00000100678, ENSG00000184588, ENSG00000197043, ENSG00000186439, ENSG00000176273, ENSG00000143183, ENSG00000184544, ENSG00000154118, ENSG00000139151, ENSG00000036828, ENSG00000017260, ENSG00000109689, ENSG00000183454, ENSG00000166473, ENSG00000150625, ENSG0000…	2498	405	15419	1.47836	0.352176	0.0100454	0.0969155
GOTERM_BP_FAT	GO:0010975~regulation of neuron projection development	95	3.19435	5.39629e-05	ENSG00000152208, ENSG00000185345, ENSG00000154310, ENSG00000145868, ENSG00000144724, ENSG00000161681, ENSG00000116473, ENSG00000168038, ENSG00000187122, ENSG00000197892, ENSG00000171862, ENSG00000187164, ENSG00000065320, ENSG00000204217, ENSG00000187323, ENSG00000135407, ENSG00000107864, ENSG00000169032, ENSG00000072832, ENSG00000005884, ENSG00000116044, ENSG00000107263, ENSG00000066248, ENSG0000…	2498	396	15419	1.48079	0.386478	0.0110418	0.109054
GOTERM_BP_FAT	GO:0007215~glutamate receptor signaling pathway	26	0.874243	5.53975e-05	ENSG00000006116, ENSG00000083067, ENSG00000152208, ENSG00000149403, ENSG00000161681, ENSG00000103942, ENSG00000125675, ENSG00000179603, ENSG00000171189, ENSG00000182771, ENSG00000183454, ENSG00000152578, ENSG00000196277, ENSG00000112038, ENSG00000155511, ENSG00000273079, ENSG00000120899, ENSG00000182621, ENSG00000156052, ENSG00000143786, ENSG00000168959, ENSG00000198822, ENSG00000158445, ENSG0000…	2498	70	15419	2.29266	0.394395	0.0110832	0.111951
GOTERM_BP_FAT	GO:0010646~regulation of cell communication	541	18.191	6.26227e-05	ENSG00000126070, ENSG00000198909, ENSG00000113448, ENSG00000197142, ENSG00000137727, ENSG00000136492, ENSG00000147010, ENSG00000117262, ENSG00000124313, ENSG00000127928, ENSG00000141646, ENSG00000121210, ENSG00000152910, ENSG00000080298, ENSG00000183783, ENSG00000171132, ENSG00000186153, ENSG00000166444, ENSG00000198722, ENSG00000100281, ENSG00000101938, ENSG00000146376, ENSG00000141837, ENSG0000…	2498	2901	15419	1.1511	0.432742	0.0122492	0.126544
GOTERM_MF_FAT	GO:0060589~nucleoside-triphosphatase regulator activity	78	2.62273	6.59079e-05	ENSG00000138698, ENSG00000111785, ENSG00000067208, ENSG00000137727, ENSG00000134215, ENSG00000136770, ENSG00000109680, ENSG00000155903, ENSG00000131374, ENSG00000242247, ENSG00000121957, ENSG00000145819, ENSG00000128805, ENSG00000105738, ENSG00000182732, ENSG00000115839, ENSG00000174373, ENSG00000011454, ENSG00000152689, ENSG00000152061, ENSG00000204634, ENSG00000146376, ENSG00000170946, ENSG0000…	2274	318	14309	1.54343	0.140605	0.00360129	0.115097
GOTERM_BP_FAT	GO:0007399~nervous system development	399	13.4163	6.99019e-05	ENSG00000074527, ENSG00000102385, ENSG00000170382, ENSG00000156687, ENSG00000170485, ENSG00000166833, ENSG00000127928, ENSG00000141646, ENSG00000006451, ENSG00000169126, ENSG00000198722, ENSG00000139767, ENSG00000101938, ENSG00000141837, ENSG00000165091, ENSG00000198513, ENSG00000157423, ENSG00000156052, ENSG00000128573, ENSG00000130638, ENSG00000116641, ENSG00000163697, ENSG00000173482, ENSG0000…	2498	2080	15419	1.18406	0.468921	0.0133745	0.141243
KEGG_PATHWAY	hsa04024:cAMP signaling pathway	53	1.78211	7.18404e-05	ENSG00000138193, ENSG00000118260, ENSG00000075651, ENSG00000116473, ENSG00000113448, ENSG00000184588, ENSG00000134215, ENSG00000170289, ENSG00000149269, ENSG00000134318, ENSG00000142875, ENSG00000100030, ENSG00000170820, ENSG00000196917, ENSG00000183454, ENSG00000067900, ENSG00000152578, ENSG00000169032, ENSG00000117020, ENSG00000151067, ENSG00000155511, ENSG00000152495, ENSG00000164270, ENSG0000…	1025	195	6422	1.70289	0.0204782	0.00229634	0.0953607
INTERPRO	IPR014352:FERM/acyl-CoA-binding protein, 3-helical bundle	20	0.672495	7.47483e-05	ENSG00000172159, ENSG00000152767, ENSG00000079819, ENSG00000088179, ENSG00000095203, ENSG00000159023, ENSG00000151474, ENSG00000101311, ENSG00000120899, ENSG00000169933, ENSG00000073712, ENSG00000054690, ENSG00000170324, ENSG00000129595, ENSG00000171877, ENSG00000114541, ENSG00000163629, ENSG00000152104, ENSG00000139926, ENSG00000088367	2761	47	16821	2.59249	0.20226	0.0132045	0.134626
GOTERM_BP_FAT	GO:1904062~regulation of cation transmembrane transport	56	1.88299	7.89151e-05	ENSG00000113448, ENSG00000183023, ENSG00000080709, ENSG00000089250, ENSG00000184588, ENSG00000186439, ENSG00000184544, ENSG00000185774, ENSG00000154118, ENSG00000198373, ENSG00000163681, ENSG00000109689, ENSG00000118507, ENSG00000148175, ENSG00000165995, ENSG00000075142, ENSG00000151577, ENSG00000171132, ENSG00000153721, ENSG00000151067, ENSG00000130038, ENSG00000152818, ENSG00000197943, ENSG0000…	2498	206	15419	1.67797	0.510537	0.0147741	0.159441
[truncated: 526 more rows]

## Sheet: S11
Supplemental Table S11: Correlations of tRFs with mRNAs in BLCA, LUAD and KIRC-ccA per sex
mRNA (Gene Name|Entrez ID)	tRNA fragment	Spearman Correlation Coefficient	P-value	FDR	Wiring
[truncated: 54,298 more rows]

## Sheet: S12
Supplemental Table S12: DAVID analysis on the mRNAs of the CW (commonly wired) and DW (differentially-wired) tRF--mRNA correlations between male and female patients
[truncated: 227 more rows]
